# Supplementary material for: Balanced basis sets of split valence, triple zeta valence and quadruple zeta valence quality for H to Rn: Design and assessment of accuracy
Source: Royal Society of Chemistry journal article supplement (doi:10.1039/b508541a), 2005-01-01
Supplement: b508541a_bases.pdf [file b508541a_bases.pdf]

```

=====
def2-SV(P)
=====
*
h def2-SV(P)
# h      (4s) / [2s]      {31}
*
  3 s
  13.010701000      0.19682158000E-01
  1.9622572000     0.13796524000
  0.44453796000     0.47831935000
  1 s
  0.12194962000     1.00000000000
*
*
he def2-SV(P)
# he     (4s1p) / [2s1p]   {31/1}
*
  3 s
  38.354936737      0.23814288905E-01
  5.7689081479      0.15490906777
  1.2399407035      0.46998096633
  1 s
  0.29757815953     1.00000000000
  1 p
  1.00000000000     1.00000000000
*
*
li def2-SV(P)
# li     (7s3p) / [3s2p]   {511/21}
*
  5 s
  266.27785516      0.64920150325E-02
  40.069783447      0.47747863215E-01
  9.0559944389      0.20268796111
  2.4503009051      0.48606574817
  0.72209571855     0.43626977955
  1 s
  0.52810884721E-01  1.00000000000
  1 s
  0.20960948798E-01  1.00000000000
  2 p
  1.45000000000      0.25860000000
  0.30000000000      1.00000000000
  1 p
  0.82000000000E-01  1.00000000000
*
*
be def2-SV(P)
# be     (7s4p) / [3s2p]   {511/31}
*
  5 s
  515.18616125      0.55615307983E-02
  77.511037595      0.41190068062E-01
  17.552481693      0.17913378108
  4.8028940596      0.44736716455
  1.4516214316      0.42009581920
  1 s
  0.13281633620     1.00000000000
  1 s

```

```

0.45837372213E-01  1.0000000000
  3 p
  3.6316917145      -0.29033998305E-01
0.71695694366      -0.16877854032
0.19541932860      -0.51403419628
  1 p
0.60515465890E-01  1.0000000000
*
*
b def2-SV(P)
# b      (7s4p1d) / [3s2p1d]      {511/31/1}
*
  5 s
  839.31830086      -0.55929201074E-02
  126.26464843      -0.41565520771E-01
  28.620600763      -0.18299816983
  7.8793722710      -0.46540391866
  2.4088857172      -0.44173884791
  1 s
0.25105109036      1.0000000000
  1 s
0.83648866069E-01  1.0000000000
  3 p
  6.0332223619      -0.35603672456E-01
  1.2499157866      -0.19895775769
  0.33871676350      -0.50850202618
  1 p
0.96415632351E-01  1.0000000000
  1 d
0.50000000000      1.0000000000
*
*
c def2-SV(P)
# c      (7s4p1d) / [3s2p1d]      {511/31/1}
*
  5 s
  1238.4016938      0.54568832082E-02
  186.29004992      0.40638409211E-01
  42.251176346      0.18025593888
  11.676557932      0.46315121755
  3.5930506482      0.44087173314
  1 s
0.40245147363      1.0000000000
  1 s
0.13090182668      1.0000000000
  3 p
  9.4680970621      0.38387871728E-01
  2.0103545142      0.21117025112
  0.54771004707      0.51328172114
  1 p
0.15268613795      1.0000000000
  1 d
0.80000000000      1.0000000000
*
*
n def2-SV(P)
# n      (7s4p1d) / [3s2p1d]      {511/31/1}
*
  5 s
  1712.8415853      -0.53934125305E-02

```

|                                    |                    |
|------------------------------------|--------------------|
| 257.64812677                       | -0.40221581118E-01 |
| 58.458245853                       | -0.17931144990     |
| 16.198367905                       | -0.46376317823     |
| 5.0052600809                       | -0.44171422662     |
| 1 s                                |                    |
| 0.58731856571                      | 1.0000000000       |
| 1 s                                |                    |
| 0.18764592253                      | 1.0000000000       |
| 3 p                                |                    |
| 13.571470233                       | -0.40072398852E-01 |
| 2.9257372874                       | -0.21807045028     |
| 0.79927750754                      | -0.51294466049     |
| 1 p                                |                    |
| 0.21954348034                      | 1.0000000000       |
| 1 d                                |                    |
| 1.0000000000                       | 1.0000000000       |
| *                                  |                    |
| *                                  |                    |
| o def2-SV(P)                       |                    |
| # o (7s4p1d) / [3s2p1d] {511/31/1} |                    |
| *                                  |                    |
| 5 s                                |                    |
| 2266.1767785                       | -0.53431809926E-02 |
| 340.87010191                       | -0.39890039230E-01 |
| 77.363135167                       | -0.17853911985     |
| 21.479644940                       | -0.46427684959     |
| 6.6589433124                       | -0.44309745172     |
| 1 s                                |                    |
| 0.80975975668                      | 1.0000000000       |
| 1 s                                |                    |
| 0.25530772234                      | 1.0000000000       |
| 3 p                                |                    |
| 17.721504317                       | 0.43394573193E-01  |
| 3.8635505440                       | 0.23094120765      |
| 1.0480920883                       | 0.51375311064      |
| 1 p                                |                    |
| 0.27641544411                      | 1.0000000000       |
| 1 d                                |                    |
| 1.2000000000                       | 1.0000000000       |
| *                                  |                    |
| *                                  |                    |
| f def2-SV(P)                       |                    |
| # f (7s4p1d) / [3s2p1d] {511/31/1} |                    |
| *                                  |                    |
| 5 s                                |                    |
| 2894.8325990                       | -0.53408255515E-02 |
| 435.41939120                       | -0.39904258866E-01 |
| 98.843328866                       | -0.17912768038     |
| 27.485198001                       | -0.46758090825     |
| 8.5405498171                       | -0.44653131020     |
| 1 s                                |                    |
| 1.0654578038                       | 1.0000000000       |
| 1 s                                |                    |
| 0.33247346748                      | 1.0000000000       |
| 3 p                                |                    |
| 22.696633924                       | -0.45212874436E-01 |
| 4.9872339257                       | -0.23754317067     |
| 1.3491613954                       | -0.51287353587     |
| 1 p                                |                    |
| 0.34829881977                      | 1.0000000000       |

```

1 d
1.4000000000      1.0000000000
*
*
ne def2-SV(P)
# ne      (7s4p1d) / [3s2p1d]      {511/31/1}
*
5 s
3598.9736625     -0.53259297003E-02
541.32073112     -0.39817417969E-01
122.90450062     -0.17914358188
34.216617022     -0.46893582977
10.650584124     -0.44782537577
1 s
1.3545953960      1.0000000000
1 s
0.41919362639     1.0000000000
3 p
28.424053785     -0.46031944795E-01
6.2822510953     -0.23993183041
1.6978715079     -0.50871724964
1 p
0.43300700172     1.0000000000
1 d
1.8880000000      1.0000000000
*
*
na def2-SV(P)
# na      (10s6p1d) / [4s2p1d]      {5311/51/1}
*
5 s
4098.2003908     -0.58535911879E-02
616.49374031     -0.43647161872E-01
139.96644001     -0.19431465884
39.073441051     -0.48685065731
11.929847205     -0.41881705137
3 s
20.659966030      0.85949689854E-01
1.9838860978     -0.56359144041
0.64836323942     -0.51954009048
1 s
0.52443967404E-01  1.0000000000
1 s
0.28048160742E-01  1.0000000000
5 p
75.401862017      0.15435362532E-01
17.274818978      0.99738293184E-01
5.1842347425      0.31209593966
1.6601211973      0.49295674807
0.51232528958      0.32420398318
1 p
0.52000000000E-01  1.0000000000
1 d
0.13100000000      0.0000000000
*
*
mg def2-SV(P)
# mg      (10s7p1d) / [4s3p1d]      {5311/511/1}
*
5 s

```

```

4953.8339196      -0.57778967498E-02
745.18044154     -0.43124761082E-01
169.21604972     -0.19268216987
47.300672019     -0.48641439116
14.461336973     -0.42550894077
 3 s
24.768174789     0.87956969984E-01
2.4940945349     -0.55165058128
0.87807584533    -0.53443294833
 1 s
0.87212782497E-01 1.0000000000
 1 s
0.33599293780E-01 1.0000000000
 5 p
98.053010494     -0.14480564601E-01
22.586932277     -0.95495750787E-01
6.8391509842     -0.30787672651
2.2332843818     -0.49936292886
0.71606599387    -0.31503476213
 1 p
0.18914796195     1.0000000000
 1 p
0.53768755187E-01 1.0000000000
 1 d
0.10100000000     1.0000000000
*
*
al def2-SV(P)
# al      (10s7p1d) / [4s3p1d]      {5311/511/1}
*
 5 s
5887.5727030     0.13483347987E-02
885.61225996     0.10071576809E-01
201.13604899     0.45132454056E-01
56.284974674     0.11461268043
17.229551243     0.10159608943
 3 s
29.340249922     0.69347454208E-01
3.0439630420     -0.42528117679
1.1285539518     -0.41449832210
 1 s
0.14234175160     1.0000000000
 1 s
0.54400192313E-01 1.0000000000
 5 p
145.11918809     0.63963373134E-02
33.717894833     0.44189359965E-01
10.369863083     0.15581575993
3.5135616036     0.28635286951
1.1980050273     0.22921423248
 1 p
0.26583005913     1.0000000000
 1 p
0.71003361994E-01 1.0000000000
 1 d
0.30000000000     1.0000000000
*
*
si def2-SV(P)
# si      (10s7p1d) / [4s3p1d]      {5311/511/1}

```

\*

5 s  
6903.7118686 0.13373962995E-02  
1038.4346419 0.99966546241E-02  
235.87581480 0.44910165101E-01  
66.069385169 0.11463638540  
20.247945761 0.10280063858

3 s  
34.353481730 0.70837285010E-01  
3.6370788192 -0.43028836252  
1.4002048599 -0.41382774969

1 s  
0.20484414805 1.0000000000

1 s  
0.77994095468E-01 1.0000000000

5 p  
179.83907373 0.61916656462E-02  
41.907258846 0.43399431982E-01  
12.955294367 0.15632019351  
4.4383267393 0.29419996982  
1.5462247904 0.23536823814

1 p  
0.35607612302 1.0000000000

1 p  
0.10008513762 1.0000000000

1 d  
0.35000000000 1.0000000000

\*

\*

p def2-SV(P)

# p (10s7p1d) / [4s3p1d] {5311/511/1}

\*

5 s  
8002.4795106 0.57503489302E-02  
1203.6813590 0.43007628959E-01  
273.44227031 0.19363986252  
76.655541517 0.49651693399  
23.516927435 0.44983262479

3 s  
39.791683439 0.95188129789E-01  
4.2770343323 -0.57649840368  
1.6940256888 -0.54239583865

1 s  
0.27567674644 1.0000000000

1 s  
0.10495590099 1.0000000000

5 p  
219.50755823 0.92100565257E-02  
51.274155030 0.65409765745E-01  
15.921595892 0.24033730279  
5.5069913481 0.46318321788  
1.9537719426 0.37392563382

1 p  
0.47803397932 1.0000000000

1 p  
0.13657952621 1.0000000000

1 d  
0.45000000000 1.0000000000

\*

\*

```

s def2-SV(P)
# s      (10s7p1d) / [4s3p1d]      {5311/511/1}
*
  5 s
  9184.9303010      -0.22294387756E-02
  1381.5105503      -0.16683029937E-01
  313.87147580      -0.75262436116E-01
  88.053870623      -0.19376827038
  27.039914905      -0.17718020803
  3 s
  45.648731303      -0.10736062573
  4.9664522326      0.65066293018
  2.0116242047      0.59712155354
  1 s
  0.35661077013      1.0000000000
  1 s
  0.13507221477      1.0000000000
  5 p
  261.98233439      -0.92729929822E-02
  61.306894736      -0.66547669241E-01
  19.103729887      -0.24828595903
  6.6567720378      -0.48703847402
  2.3959635161      -0.39337850312
  1 p
  0.61776161679      1.0000000000
  1 p
  0.16993376871      1.0000000000
  1 d
  0.55000000000      1.0000000000
*
*
c1 def2-SV(P)
# c1      (10s7p1d) / [4s3p1d]      {5311/511/1}
*
  5 s
  10449.827566      0.19708362484E-02
  1571.7365221      0.14754727977E-01
  357.12065523      0.66679112875E-01
  100.25185935      0.17228924084
  30.812727554      0.15883786100
  3 s
  51.923789434      -0.10009298909
  5.7045760975      0.60841752753
  2.3508376809      0.54352153355
  1 s
  0.44605124672      1.0000000000
  1 s
  0.16848856190      1.0000000000
  5 p
  307.66790569      -0.87801484118E-02
  72.102015515      -0.63563355471E-01
  22.532680262      -0.24016428276
  7.8991765444      -0.47798866557
  2.8767268321      -0.38515850005
  1 p
  0.77459363955      1.0000000000
  1 p
  0.21037699698      1.0000000000
  1 d
  0.65000000000      1.0000000000

```

```

*
*
ar def2-SV(P)
# ar      (10s7p1d) / [4s3p1d]      {5311/511/1}
*
  5 s
11797.119765      0.20214479973E-02
1774.3522753     0.15139852688E-01
403.18875733     0.68525400873E-01
113.24933999     0.17762929207
34.835298193     0.16496495001
  3 s
58.614775042     -0.10343394000
6.4922045078     0.63133365899
2.7117014403     0.54887572301
  1 s
0.54412974538    1.00000000000
  1 s
0.20517411136    1.00000000000
  5 p
356.28707256     -0.87321783271E-02
83.593132866     -0.63680317444E-01
26.186704029     -0.24311906886
9.2257275925     -0.48956069653
3.3922754954     -0.39229190040
  1 p
0.94740534010    1.00000000000
  1 p
0.25659135062    1.00000000000
  1 d
0.69600000000    1.00000000000
*
*
k def2-SV(P)
# k      (14s9p2d) / [5s3p2d]      {63311/531/11}
*
  6 s
31478.746764     0.39838653994E-02
4726.8876066     0.30501759762E-01
1075.4345353     0.15073752622
303.39811023     0.51912939801
98.327112831     1.0366957005
33.636222177     0.76398963199
  3 s
65.639209962     -0.28242617106
7.3162592218     1.6914935860
2.8902580135     1.2965331953
  3 s
4.5459748965     -0.76343555273E-02
0.70404124062     0.25635718960E-01
0.28266888959     0.16606859208E-01
  1 s
0.29058164020E-01 1.00000000000
  1 s
0.12111638157E-01 1.00000000000
  5 p
361.22492154     0.20906479823E-01
84.670222166     0.15043641740
26.469088236     0.55440061077
9.2658077615     1.0409009991

```



|                                          |                    |
|------------------------------------------|--------------------|
| 3.3423388293                             | 0.67825341194      |
| 3 p                                      |                    |
| 1.5100876104                             | 0.75248191146      |
| 0.56568375163                            | 1.3708585031       |
| 0.20817008495                            | 0.66047633079      |
| 1 p                                      |                    |
| 0.41737000000E-01                        | 1.0000000000       |
| 1 d                                      |                    |
| 0.35300000000                            | 1.0000000000       |
| 1 d                                      |                    |
| 0.98000000000E-01                        | 1.0000000000       |
| *                                        |                    |
| *                                        |                    |
| ca def2-SV(P)                            |                    |
| # ca (14s9p4d) / [5s3p2d] {63311/531/31} |                    |
| *                                        |                    |
| 6 s                                      |                    |
| 35138.713929                             | 0.39482520740E-02  |
| 5276.4111348                             | 0.30234243552E-01  |
| 1200.4692589                             | 0.14952019681      |
| 338.71810542                             | 0.51597345713      |
| 109.85385922                             | 1.0339510296       |
| 37.608880299                             | 0.76937933526      |
| 3 s                                      |                    |
| 73.107977555                             | -0.28268525011     |
| 8.2407705688                             | 1.6796092142       |
| 3.2959812993                             | 1.2803766016       |
| 3 s                                      |                    |
| 5.2341800914                             | -0.76868604561E-02 |
| 0.84187220515                            | 0.25382375978E-01  |
| 0.36510294029                            | 0.16512171511E-01  |
| 1 s                                      |                    |
| 0.51222402884E-01                        | 1.0000000000       |
| 1 s                                      |                    |
| 0.19825111408E-01                        | 1.0000000000       |
| 5 p                                      |                    |
| 413.11313893                             | 0.20327135354E-01  |
| 96.935786224                             | 0.14730276362      |
| 30.372154659                             | 0.54887167322      |
| 10.684776830                             | 1.0440659818       |
| 3.8821258350                             | 0.68653490684      |
| 3 p                                      |                    |
| 1.7993016295                             | 0.75410246871      |
| 0.69189056530                            | 1.3409296599       |
| 0.26364024096                            | 0.56391989435      |
| 1 p                                      |                    |
| 0.74979000000E-01                        | 1.0000000000       |
| 3 d                                      |                    |
| 5.4979093879                             | 0.73770011433E-01  |
| 1.3177128032                             | 0.26052853169      |
| 0.32188682649                            | 0.45233836380      |
| 1 d                                      |                    |
| 0.70528614919E-01                        | 1.0000000000       |
| *                                        |                    |
| *                                        |                    |
| sc def2-SV(P)                            |                    |
| # sc (14s9p5d) / [5s3p2d] {63311/531/41} |                    |
| *                                        |                    |
| 6 s                                      |                    |
| 38956.081804                             | 0.39293205858E-02  |

|                                          |                    |
|------------------------------------------|--------------------|
| 5849.5733637                             | 0.30093221229E-01  |
| 1330.8813154                             | 0.14890370950      |
| 375.55534165                             | 0.51464282906      |
| 121.87261370                             | 1.0337708070       |
| 41.760243729                             | 0.77436851627      |
| 3 s                                      |                    |
| 81.060633953                             | -0.28318552316     |
| 9.2059823972                             | 1.6770806984       |
| 3.7063215732                             | 1.2594733678       |
| 3 s                                      |                    |
| 5.9888909988                             | -0.77821367493E-02 |
| 0.97363432378                            | 0.25499692745E-01  |
| 0.42041019223                            | 0.16191560820E-01  |
| 1 s                                      |                    |
| 0.59440551913E-01                        | 1.0000000000       |
| 1 s                                      |                    |
| 0.22897806303E-01                        | 1.0000000000       |
| 5 p                                      |                    |
| 466.31481262                             | 0.19984300385E-01  |
| 109.51217097                             | 0.14561043072      |
| 34.375921827                             | 0.54687466223      |
| 12.142096955                             | 1.0479006012       |
| 4.4336767669                             | 0.68894890327      |
| 3 p                                      |                    |
| 2.0971291866                             | 0.75619214724      |
| 0.80977606956                            | 1.3178212235       |
| 0.30834046588                            | 0.54312268173      |
| 1 p                                      |                    |
| 0.89748000000E-01                        | 1.0000000000       |
| 4 d                                      |                    |
| 19.240334928                             | 0.27039082144E-01  |
| 5.1178995899                             | 0.13803684743      |
| 1.6554278827                             | 0.34869086403      |
| 0.54016355610                            | 0.48594185717      |
| 1 d                                      |                    |
| 0.16211214518                            | 0.343744449689     |
| *                                        |                    |
| *                                        |                    |
| ti def2-SV(P)                            |                    |
| # ti (14s9p5d) / [5s3p2d] {63311/531/41} |                    |
| *                                        |                    |
| 6 s                                      |                    |
| 42961.512185                             | 0.39127635355E-02  |
| 6450.9759169                             | 0.29969820489E-01  |
| 1467.7210915                             | 0.14836352707      |
| 414.20997355                             | 0.51347285324      |
| 134.48715840                             | 1.0335365483       |
| 46.122209796                             | 0.77854233930      |
| 3 s                                      |                    |
| 89.447762543                             | -0.28385401259     |
| 10.223346060                             | 1.6772785333       |
| 4.1353774271                             | 1.2411928456       |
| 3 s                                      |                    |
| 6.7896181452                             | -0.78399994518E-02 |
| 1.1106730691                             | 0.25495493019E-01  |
| 0.47565975578                            | 0.16061172892E-01  |
| 1 s                                      |                    |
| 0.65986956934E-01                        | 1.0000000000       |
| 1 s                                      |                    |
| 0.25210342250E-01                        | 1.0000000000       |

```

5 p
522.03684782      0.19754179642E-01
122.68649489      0.14460677619
38.572903611      0.54669004165
13.672169319      1.0531647540
5.0118529359      0.69111213363
3 p
2.4131928282      0.75803437136
0.93252270050      1.3036241399
0.35429058390      0.53638653300
1 p
0.10156100000      1.00000000000
4 d
23.465125957      0.26536380115E-01
6.3332593832      0.13796453963
2.0766489946      0.35312644228
0.69027361954      0.48647124166
1 d
0.21088738554      0.33026314258
*
*
v def2-SV(P)
# v      (14s9p5d) / [5s3p2d]      {63311/531/41}
*
6 s
47160.376060      0.14498688908E-02
7081.4110871      0.11106435251E-01
1611.1621223      0.55005423585E-01
454.72940551      0.19060252591
147.71321208      0.38435022957
50.699538950      0.29095546792
3 s
98.262492669      -0.10942337856
11.294293099      0.64539490399
4.5853360105      0.47117880777
3 s
7.6359689588      -0.22454949054
1.2539836689      0.72594852764
0.53271935387      0.45560582748
1 s
0.72246239566E-01      1.00000000000
1 s
0.27358087448E-01      1.00000000000
5 p
580.55044988      0.97315110917E-02
136.52341127      0.71531241137E-01
42.983958820      0.27197688414
15.282798763      0.52618988893
5.6202495154      0.34452533498
3 p
2.7485386415      0.34040396496
1.0618550073      0.57983996120
0.40235518645      0.23911643083
1 p
0.11124800000      1.00000000000
4 d
27.358434017      0.26641927050E-01
7.4540604253      0.13995311726
2.4633917847      0.35751066639
0.82480925277      0.48488354148

```

```

1 d
0.25257904742      0.32332844995
*
*
cr def2-SV(P)
# cr      (14s9p5d) / [5s3p2d]      {63311/531/41}
*
6 s
51528.086349      0.14405823106E-02
7737.2103487      0.11036202287E-01
1760.3748470      0.54676651806E-01
496.87706544      0.18965038103
161.46520598      0.38295412850
55.466352268      0.29090050668
3 s
107.54732999      -0.10932281100
12.408671897      0.64472599471
5.0423628826      0.46262712560
3 s
8.5461640165      -0.22711013286
1.3900441221      0.73301527591
0.56066602876      0.44225565433
1 s
0.71483705972E-01  1.00000000000
1 s
0.28250687604E-01  1.00000000000
5 p
640.48536096      0.96126715203E-02
150.69711194      0.70889834655E-01
47.503755296      0.27065258990
16.934120165      0.52437343414
6.2409680590      0.34107994714
3 p
3.0885463206      0.33973986903
1.1791047769      0.57272062927
0.43369774432      0.24582728206
1 p
0.12067500000      1.00000000000
4 d
27.559479426      0.30612488044E-01
7.4687020327      0.15593270944
2.4345903574      0.36984421276
0.78244754808      0.47071118077
1 d
0.21995774311      0.33941649889
*
*
mn def2-SV(P)
# mn      (14s9p5d) / [5s3p2d]      {63311/531/41}
*
6 s
56137.009037      0.14321304702E-02
8429.2063943      0.10972509162E-01
1917.8277233      0.54382468712E-01
541.36230198      0.18884335129
176.00069142      0.38198025054
60.500477010      0.29156772596
3 s
117.17282882      -0.10933661328
13.596973368      0.64305039431

```

|                                          |                   |
|------------------------------------------|-------------------|
| 5.5483996341                             | 0.45848970584     |
| 3 s                                      |                   |
| 9.4662853530                             | -0.22538977259    |
| 1.5595006070                             | 0.72307758657     |
| 0.65230205868                            | 0.45300721536     |
| 1 s                                      |                   |
| 0.84003734475E-01                        | 1.0000000000      |
| 1 s                                      |                   |
| 0.31256098581E-01                        | 1.0000000000      |
| 5 p                                      |                   |
| 706.00497535                             | 0.95055518167E-02 |
| 166.19728820                             | 0.70356271142E-01 |
| 52.452061906                             | 0.27005556982     |
| 18.746932862                             | 0.52574344602     |
| 6.9282991622                             | 0.34254033223     |
| 3 p                                      |                   |
| 3.4772204938                             | 0.33994073736     |
| 1.3406906449                             | 0.57203836254     |
| 0.50498803038                            | 0.23847605831     |
| 1 p                                      |                   |
| 0.12765000000                            | 1.0000000000      |
| 4 d                                      |                   |
| 35.423264935                             | 0.26985304111E-01 |
| 9.7814221451                             | 0.14383458648     |
| 3.2673488767                             | 0.36418958377     |
| 1.1026472189                             | 0.48152670661     |
| 1 d                                      |                   |
| 0.33743205934                            | 0.31458754360     |
| *                                        |                   |
| *                                        |                   |
| fe def2-SV(P)                            |                   |
| # fe (14s9p5d) / [5s3p2d] {63311/531/41} |                   |
| *                                        |                   |
| 6 s                                      |                   |
| 60923.640643                             | 0.14302254466E-02 |
| 9147.8893982                             | 0.10958790038E-01 |
| 2081.3505927                             | 0.54332554248E-01 |
| 587.55977067                             | 0.18884995009     |
| 191.09043990                             | 0.38253069946     |
| 65.732730112                             | 0.29308335984     |
| 3 s                                      |                   |
| 127.25891928                             | -0.10964564925    |
| 14.830913010                             | 0.64387631332     |
| 6.0653307408                             | 0.45472347323     |
| 3 s                                      |                   |
| 10.449943710                             | -0.22539639952    |
| 1.7245228003                             | 0.72164398156     |
| 0.71772177325                            | 0.44985492922     |
| 1 s                                      |                   |
| 0.91449828308E-01                        | 1.0000000000      |
| 1 s                                      |                   |
| 0.33706691021E-01                        | 1.0000000000      |
| 5 p                                      |                   |
| 773.43750995                             | 0.94325735144E-02 |
| 182.15149714                             | 0.70029620575E-01 |
| 57.547272758                             | 0.26993651996     |
| 20.614988935                             | 0.52700011047     |
| 7.6348557890                             | 0.34284148028     |
| 3 p                                      |                   |
| 3.8719327990                             | 0.33974402988     |

|                                          |                   |
|------------------------------------------|-------------------|
| 1.4924724132                             | 0.56842594005     |
| 0.56061284958                            | 0.23649365839     |
| 1 p                                      |                   |
| 0.13491500000                            | 1.00000000000     |
| 4 d                                      |                   |
| 38.968133419                             | 0.27879664382E-01 |
| 10.800067078                             | 0.14858319982     |
| 3.6136457999                             | 0.36905479496     |
| 1.2129967888                             | 0.47745100883     |
| 1 d                                      |                   |
| 0.36524393170                            | 0.31418142304     |
| *                                        |                   |
| *                                        |                   |
| co def2-SV(P)                            |                   |
| # co (14s9p5d) / [5s3p2d] {63311/531/41} |                   |
| *                                        |                   |
| 6 s                                      |                   |
| 65902.208257                             | 0.14284614936E-02 |
| 9895.3896027                             | 0.10946072783E-01 |
| 2251.4305789                             | 0.54285953890E-01 |
| 635.61097084                             | 0.18885179079     |
| 206.78820681                             | 0.38301634994     |
| 71.179242971                             | 0.29443551266     |
| 3 s                                      |                   |
| 137.77268040                             | -0.10990221736    |
| 16.118079243                             | 0.64455537395     |
| 6.6030327710                             | 0.45116787924     |
| 3 s                                      |                   |
| 11.479915788                             | -0.22593846910    |
| 1.8956426324                             | 0.72231409008     |
| 0.78466232067                            | 0.44903812296     |
| 1 s                                      |                   |
| 0.98425774432E-01                        | 1.00000000000     |
| 1 s                                      |                   |
| 0.35945741932E-01                        | 1.00000000000     |
| 5 p                                      |                   |
| 843.64358575                             | 0.93866097254E-02 |
| 198.76386994                             | 0.69880208716E-01 |
| 62.854963098                             | 0.27037070345     |
| 22.562842280                             | 0.52904786880     |
| 8.3713209127                             | 0.34357029579     |
| 3 p                                      |                   |
| 4.2858719800                             | 0.34027999036     |
| 1.6508041817                             | 0.56693392384     |
| 0.61834231096                            | 0.23617979783     |
| 1 p                                      |                   |
| 0.14130800000                            | 1.00000000000     |
| 4 d                                      |                   |
| 42.927867612                             | 0.28487788365E-01 |
| 11.942533053                             | 0.15206951283     |
| 4.0046495664                             | 0.37310913999     |
| 1.3413193804                             | 0.47549837676     |
| 1 d                                      |                   |
| 0.40015009743                            | 0.31346831424     |
| *                                        |                   |
| *                                        |                   |
| ni def2-SV(P)                            |                   |
| # ni (14s9p5d) / [5s3p2d] {63311/531/41} |                   |
| *                                        |                   |
| 6 s                                      |                   |

|                                          |                   |
|------------------------------------------|-------------------|
| 71074.803211                             | 0.14260386729E-02 |
| 10672.020941                             | 0.10928236994E-01 |
| 2428.1389007                             | 0.54212626938E-01 |
| 685.53595148                             | 0.18874768902     |
| 223.10072863                             | 0.38324616985     |
| 76.842014042                             | 0.29550637144     |
| 3 s                                      |                   |
| 148.71122016                             | -0.11014443059    |
| 17.459154987                             | 0.64521426988     |
| 7.1625280665                             | 0.44797838103     |
| 3 s                                      |                   |
| 12.556137125                             | -0.22645403224    |
| 2.0735740488                             | 0.72320959286     |
| 0.85382640602                            | 0.44868026476     |
| 1 s                                      |                   |
| 0.10536766271                            | 1.0000000000      |
| 1 s                                      |                   |
| 0.38134087688E-01                        | 1.0000000000      |
| 5 p                                      |                   |
| 916.73608662                             | 0.93439635610E-02 |
| 216.06139913                             | 0.69737374902E-01 |
| 68.383914817                             | 0.27073495012     |
| 24.593843952                             | 0.53078301549     |
| 9.1392960204                             | 0.34410229438     |
| 3 p                                      |                   |
| 4.7193371746                             | 0.34076082016     |
| 1.8161849234                             | 0.56580169611     |
| 0.67840750720                            | 0.23616717361     |
| 1 p                                      |                   |
| 0.14658800000                            | 1.0000000000      |
| 4 d                                      |                   |
| 47.093832108                             | 0.28982316948E-01 |
| 13.146463975                             | 0.15494995950     |
| 4.4170548925                             | 0.37633115111     |
| 1.4771565078                             | 0.47365096014     |
| 1 d                                      |                   |
| 0.43735921792                            | 0.31247837833     |
| *                                        |                   |
| *                                        |                   |
| cu def2-SV(P)                            |                   |
| # cu (14s9p5d) / [5s3p2d] {63311/531/41} |                   |
| *                                        |                   |
| 6 s                                      |                   |
| 76381.348056                             | 0.14336079896E-02 |
| 11468.777499                             | 0.10986749865E-01 |
| 2609.4246495                             | 0.54513652465E-01 |
| 736.75033098                             | 0.18990128258     |
| 239.82419958                             | 0.38581959211     |
| 82.656829252                             | 0.29790607498     |
| 3 s                                      |                   |
| 160.13544196                             | -0.11146778567    |
| 18.834177695                             | 0.65349301031     |
| 7.7176595741                             | 0.44770534421     |
| 3 s                                      |                   |
| 13.710846717                             | -0.22870911122    |
| 2.2349895670                             | 0.73464423031     |
| 0.87818360069                            | 0.43273070874     |
| 1 s                                      |                   |
| 0.87187458064E-01                        | 1.0000000000      |
| 1 s                                      |                   |

```

0.32969114665E-01  1.0000000000
  5 p
991.24075782      0.93878498798E-02
233.69376116      0.70208282458E-01
74.020930927      0.27323522220
26.664967447      0.53580792728
9.9192087478      0.34575794906
  3 p
5.1519553926      0.34229108083
1.9638205828      0.56456592484
0.71560097037     0.24078584318
  1 p
0.15506500000     1.00000000000
  4 d
47.335049590      0.32375547758E-01
13.161666077      0.16810218684
4.3693777244      0.38477707982
1.4132925109      0.46147880178
  1 d
0.38878001452     0.32388873258
*
*
zn def2-SV(P)
# zn      (14s9p5d) / [5s3p2d]      {63311/531/41}
*
  6 s
82000.711629      0.14210764000E-02
12312.471777      0.10891499487E-01
2801.3944193      0.54057188059E-01
790.99424302      0.18847463904
257.56551079      0.38346549346
88.814933400      0.29723794197
  3 s
171.86353716      -0.11051849523
20.302534785      0.64607716984
8.3464123068      0.44220117322
  3 s
14.847536940      -0.22705309278
2.4495029507      0.72433217935
0.99845821824     0.44836495592
  1 s
0.11891307937     1.00000000000
  1 s
0.42297428760E-01  1.00000000000
  5 p
1071.5185372      0.92767797235E-02
252.69712152      0.69541149434E-01
80.100829126      0.27156772564
28.903393172      0.53401355573
10.768899879      0.34501323446
  3 p
5.6446212530      0.34129600164
2.1678291347      0.56390521973
0.80540898341     0.23676109735
  1 p
0.16245500000     1.00000000000
  4 d
56.088939191      0.29588869140E-01
15.751908917      0.15872571404
5.3115812367      0.37976229159

```



```

1.7737904917      0.46898959172
 1 d
0.51975583665      0.30907149078
*
*
ga def2-SV(P)
# ga      (14s10p6d) / [5s4p3d]      {63311/5311/411}
*
 6 s
87842.126296      0.14271588798E-02
13189.496402      0.10938894097E-01
3000.9482141      0.54308200127E-01
847.38425966      0.18951055983
276.00980642      0.38615185918
95.216672071      0.30051082719
 3 s
184.00703968      -0.111244461963
21.827051433      0.64831322918
9.0026963761      0.44358383594
 3 s
16.033176938      -0.23014299555
2.6707724878      0.72946861516
1.1252834170      0.46214976951
 1 s
0.15967608829      1.00000000000
 1 s
0.57643044753E-01  1.00000000000
 5 p
1167.2665844      0.90974021307E-02
275.38062789      0.68456273343E-01
87.375073070      0.26922293888
31.597254670      0.53507897882
11.824122798      0.35279062760
 3 p
6.2881845133      0.33938244530
2.5199853240      0.56871947608
1.0169726306      0.27717694939
 1 p
0.24748373604      1.00000000000
 1 p
0.66685294163E-01  1.00000000000
 4 d
65.354237674      0.27370146382E-01
18.504656747      0.15099463976
6.3179620632      0.37485328545
2.1641389426      0.47510606851
 1 d
0.66693092754      0.29843287401
 1 d
0.20700000000      1.00000000000
*
*
ge def2-SV(P)
# ge      (14s10p6d) / [5s4p3d]      {63311/5311/411}
*
 6 s
93889.836642      0.14233976060E-02
14097.497528      0.10910795654E-01
3207.5477309      0.54183705943E-01
905.76727269      0.18922820349

```

|                                             |                   |
|---------------------------------------------|-------------------|
| 295.11014693                                | 0.38612847001     |
| 101.84713141                                | 0.30164050736     |
| 3 s                                         |                   |
| 196.56719662                                | -0.11118770940    |
| 23.405292522                                | 0.64616007369     |
| 9.6839116702                                | 0.44188904568     |
| 3 s                                         |                   |
| 17.269736544                                | -0.23027421375    |
| 2.8964622160                                | 0.73017169398     |
| 1.2553621412                                | 0.46197222255     |
| 1 s                                         |                   |
| 0.20213081492                               | 1.0000000000      |
| 1 s                                         |                   |
| 0.73867910982E-01                           | 1.0000000000      |
| 5 p                                         |                   |
| 1259.2085995                                | 0.90115464252E-02 |
| 297.15626382                                | 0.67986841689E-01 |
| 94.353387522                                | 0.26853856488     |
| 34.176329677                                | 0.53659649219     |
| 12.816139615                                | 0.35633514961     |
| 3 p                                         |                   |
| 6.8471029784                                | 0.33900693119     |
| 2.7717363939                                | 0.56809365264     |
| 1.1458418175                                | 0.27246539884     |
| 1 p                                         |                   |
| 0.30679631536                               | 1.0000000000      |
| 1 p                                         |                   |
| 0.89283644115E-01                           | 1.0000000000      |
| 4 d                                         |                   |
| 74.782168177                                | 0.25755860205E-01 |
| 21.310849759                                | 0.14536816132     |
| 7.3464792363                                | 0.37134209859     |
| 2.5656271395                                | 0.48002998436     |
| 1 d                                         |                   |
| 0.81981773070                               | 0.28978790744     |
| 1 d                                         |                   |
| 0.24600000000                               | 1.0000000000      |
| *                                           |                   |
| *                                           |                   |
| as def2-SV(P)                               |                   |
| # as (14s10p6d) / [5s4p3d] {63311/5311/411} |                   |
| *                                           |                   |
| 6 s                                         |                   |
| 100146.52554                                | 0.14258349617E-02 |
| 15036.861711                                | 0.10930176963E-01 |
| 3421.2902833                                | 0.54294174610E-01 |
| 966.16965717                                | 0.18976078153     |
| 314.87394026                                | 0.38775195453     |
| 108.70823790                                | 0.30402812040     |
| 3 s                                         |                   |
| 209.54238950                                | -0.11162094204    |
| 25.038221139                                | 0.64697607762     |
| 10.390964343                                | 0.44223608673     |
| 3 s                                         |                   |
| 18.555090093                                | -0.22994190569    |
| 3.1281217449                                | 0.73319107613     |
| 1.3884885073                                | 0.45533653943     |
| 1 s                                         |                   |
| 0.24714362141                               | 1.0000000000      |
| 1 s                                         |                   |

```

0.91429428670E-01  1.0000000000
  5 p
1355.6443507      0.89182507898E-02
319.99929270     0.67454750717E-01
101.67734092     0.26759772110
36.886323845     0.53776844520
13.861115909     0.35992570244
  3 p
  7.4260666912   0.34036849637
  3.0316247187   0.57030149334
  1.2783078340   0.26606170238
  1 p
0.37568503356    1.0000000000
  1 p
0.11394805454    1.0000000000
  4 d
  84.445514539   0.24518402724E-01
  24.190416102   0.14107454677
  8.4045015119   0.36875228915
  2.9808970748   0.48409561362
  1 d
0.97909243359   0.28250268781
  1 d
0.29300000000   1.0000000000
*
*
se def2-SV(P)
# se      (14s10p6d) / [5s4p3d]      {63311/5311/411}
*
  6 s
106612.20027     0.14274889113E-02
16007.604701     0.10943525114E-01
3642.1699707     0.54374171596E-01
1028.5912993     0.19018092947
335.30298888     0.38913021696
115.80129154     0.30620207088
  3 s
222.93325020    -0.11198808009
26.726257934    0.64752124207
11.124501923    0.44241976651
  3 s
19.888520061    -0.22857227762
3.3668473803    0.73591359951
1.5249277839    0.44330199577
  1 s
0.29630037912   1.0000000000
  1 s
0.11009288974   1.0000000000
  5 p
1455.9068120     0.88203597043E-02
343.75101831     0.66875851967E-01
109.29554964     0.26640578080
39.707711022     0.53834928422
14.950185232     0.36303281993
  3 p
  8.0208962094   0.34153807025
  3.2934649756   0.57257906583
  1.4058602438   0.25549813222
  1 p
0.45076123226   1.0000000000

```

```

1 p
0.13353413325      1.0000000000
4 d
94.494024044      0.23490101098E-01
27.188185260      0.13747735767
9.5091567352      0.36649929124
3.4170516853      0.48750989884
1 d
1.1479590083      0.27657943383
1 d
0.33800000000     1.0000000000
*
*
br def2-SV(P)
# br      (14s10p6d) / [5s4p3d]      {63311/5311/411}
*
6 s
113286.38776      0.14283037779E-02
17009.626303      0.10950417496E-01
3870.1842567      0.54421006604E-01
1093.0357227      0.19047907695
356.39721797      0.39024642737
123.12539643      0.30814432514
3 s
236.74084007      -0.11228065671
28.468661070      0.64775962312
11.883443722      0.44235575986
3 s
21.269633312      -0.22642576323
3.6129226841      0.73823712008
1.6626648969      0.42683868694
1 s
0.34823793232      1.0000000000
1 s
0.13019031394      1.0000000000
5 p
1560.2801881      0.87166669072E-02
368.47859205      0.66243637420E-01
117.22978849      0.26495610385
42.648909248      0.53839160587
16.087225096      0.36579387888
3 p
8.6352810058      0.34248787366
3.5613665502      0.57500678213
1.5292626609      0.24330394172
1 p
0.53064294848      1.0000000000
1 p
0.15702758965      1.0000000000
4 d
104.85518642      0.22650147581E-01
30.281143688      0.13455483230
10.651394267      0.36474454537
3.8699456233      0.49044587056
1 d
1.3240876762      0.27137289040
1 d
0.38900000000     1.0000000000
*
*

```

kr def2-SV(P)  
# kr (14s10p6d) / [5s4p3d] {63311/5311/411}  
\*

6 s  
120165.64875 0.14294234496E-02  
18042.500169 0.10959597020E-01  
4105.1800388 0.54479647470E-01  
1159.4447248 0.19081239122  
378.13810346 0.39140445949  
130.67610045 0.31007346689  
3 s  
250.96373353 -0.11258604011  
30.265930380 0.64816322524  
12.668110757 0.44240238994  
3 s  
22.697940101 -0.22391964908  
3.8673017398 0.74060953026  
1.8013706671 0.40803658445  
1 s  
0.40308639136 1.0000000000  
1 s  
0.15170527749 1.0000000000  
5 p  
1668.5736623 0.86215009803E-02  
394.13862798 0.65665506884E-01  
125.46644854 0.26366576697  
45.704992729 0.53867658574  
17.270133229 0.36865167502  
3 p  
9.2699487770 0.34346189015  
3.8364617719 0.57784776196  
1.6467163312 0.23075615197  
1 p  
0.61479686489 1.0000000000  
1 p  
0.18319467414 1.0000000000  
4 d  
115.55868603 0.21945485333E-01  
33.477985864 0.13211212879  
11.834450207 0.36333306964  
4.3408254894 0.49300484446  
1 d  
1.5079273157 0.26676858913  
1 d  
0.44300000000 1.0000000000

\*  
\*  
rb def2-SV(P)  
# rb (7s6p2d) / [5s3p2d] {31111/411/11}  
\*

3 s  
4.6687885071 0.29008526793  
2.9442428420 -0.67740090428  
0.58171262989 0.45712389487  
1 s  
0.45147933555 1.0000000000  
1 s  
0.21604923532 1.0000000000  
1 s  
0.32088816526E-01 1.0000000000

```

1 s
0.13833878175E-01 1.0000000000
4 p
5.5234179480 0.51234729472E-01
3.4120149646 -0.17337025646
0.76899021792 0.43339683188
0.33088071786 0.55354332721
1 p
0.13423268441 1.0000000000
1 p
0.20642679613E-01 1.0000000000
1 d
0.22600000000 1.0000000000
1 d
0.27432280711E-01 1.0000000000
*
rb def2-ecp
*
ncore = 28 lmax = 3
# coefficient r^n exponent
f -12.3169000 2 3.8431140
s-f 89.5001980 2 5.0365510
0.4937610 2 1.9708490
12.3169000 2 3.8431140
p-f 58.5689740 2 4.2583410
0.4317910 2 1.4707090
12.3169000 2 3.8431140
d-f 26.2248980 2 3.0231270
0.9628390 2 0.6503830
12.3169000 2 3.8431140
*
*
sr def2-SV(P)
# sr (6s6p5d) / [4s3p2d] {3111/411/41}
*
3 s
5.9276428767 0.19698765364
3.0691274814 -0.64852205985
0.70675488028 0.62064729022
1 s
0.33824024280 1.0000000000
1 s
0.61768869200E-01 1.0000000000
1 s
0.25767593093E-01 1.0000000000
4 p
2.4324720000 -0.37145059848
1.6642340000 0.37856824234
0.59455471858 0.59874487803
0.26152621998 0.35314019512
1 p
0.10258814042 1.0000000000
1 p
0.33223404030E-01 1.0000000000
4 d
3.6180810000 -0.75010000000E-02

```

```

0.99665600000    0.10809800000
0.39073500000    0.27854000000
0.12277000000    0.47731800000
  1 d
0.36655000000E-01 0.44818300000
*
sr def2-ecp
*
  ncore =    28      lmax =    3
#   coefficient   r^n      exponent
f
  -15.8059920     2        4.6339750
s-f
  135.4794300     2        7.4000740
  17.5344630     2        3.6063790
  15.8059920     2        4.6339750
p-f
  88.3597090     2        6.4848680
  15.3943720     2        3.2880530
  15.8059920     2        4.6339750
d-f
  29.8889870     2        4.6228410
  6.6594140     2        2.2469040
  15.8059920     2        4.6339750
*
*
y def2-SV(P)
# y   (7s6p5d) / [5s3p2d]   {31111/411/41}
*
  3 s
  5.1329580000    -1.3864845457
  4.2401920000    1.9459581166
  1.2982800000    0.44182603154
  1 s
  0.82904954347    1.0000000000
  1 s
  0.34752758911    1.0000000000
  1 s
  0.68418878574E-01 1.0000000000
  1 s
  0.27323992904E-01 1.0000000000
  4 p
  2.7279200000    -0.37249884912
  1.9790500000    0.32572065996
  0.79980886805    0.50094655502
  0.38409397354    0.44385929493
  1 p
  0.16173582264    1.0000000000
  1 p
  0.30000000000E-01 1.0000000000
  4 d
  3.9030833060    -0.98209792625E-02
  1.1363234302    0.19183629664
  0.45617043877    0.40597788539
  0.17470950748    0.43861485518
  1 d
  0.61978796638E-01 1.0000000000
*
y def2-ecp
*
```

```

ncore = 28          lmax = 3
#      coefficient  r^n      exponent
f      -19.1221981  2        6.5842120
      -2.4363754  2        3.2921060
s-f    135.1538441  2        7.4880494
      15.5524413  2        3.7440247
      19.1221981  2        6.5842120
      2.4363754  2        3.2921060
p-f    87.7849917  2        6.4453772
      11.5640660  2        3.2226886
      19.1221981  2        6.5842120
      2.4363754  2        3.2921060
d-f    29.7010007  2        4.6584472
      5.5399685  2        2.3292236
      19.1221981  2        6.5842120
      2.4363754  2        3.2921060

```

\*  
\*

```

zr def2-SV(P)
# zr (7s6p5d) / [5s3p2d] {31111/411/41}

```

\*

```

3 s
5.8737890000      0.54255558714
4.2872700000     -0.95241333244
1.4641370000     -0.13703926411
1 s
0.83727682345    0.88521584390
1 s
0.36849806511    1.00000000000
1 s
0.77806859124E-01 1.00000000000
1 s
0.30273088330E-01 1.00000000000
4 p
2.8742240000     -0.46624086918
2.1199010000     0.45883133891
0.78845821105    0.58853912475
0.36332579847    0.35822232244
1 p
0.14951762021    1.00000000000
1 p
0.30000000000E-01 1.00000000000
4 d
4.2898623878     -0.12212868080E-01
1.3615557498     0.19692423520
0.56937550689    0.42057831659
0.22674948677    0.42757027999
1 d
0.83011031631E-01 1.00000000000

```

\*

```

zr def2-ecp
#      coefficient  r^n      exponent
f      -21.0937760  2        7.5400000

```



|     |             |   |           |
|-----|-------------|---|-----------|
|     | -3.0806943  | 2 | 3.7700000 |
| s-f | 150.2675911 | 2 | 8.2000000 |
|     | 18.9762165  | 2 | 4.0897278 |
|     | 21.0937760  | 2 | 7.5400000 |
|     | 3.0806943   | 2 | 3.7700000 |
| p-f | 99.6221237  | 2 | 7.1100000 |
|     | 14.1687333  | 2 | 3.5967980 |
|     | 21.0937760  | 2 | 7.5400000 |
|     | 3.0806943   | 2 | 3.7700000 |
| d-f | 35.0451235  | 2 | 5.3500000 |
|     | 6.1112595   | 2 | 2.4918215 |
|     | 21.0937760  | 2 | 7.5400000 |
|     | 3.0806943   | 2 | 3.7700000 |

\*

\*

nb def2-SV(P)

# nb (7s6p5d) / [5s3p2d] {31111/411/41}

\*

|                   |                    |  |
|-------------------|--------------------|--|
| 3 s               |                    |  |
| 6.5663010000      | -0.94917907866     |  |
| 4.5864380000      | 1.5736372883       |  |
| 3.7537700000      | 0.36380422981      |  |
| 1 s               |                    |  |
| 0.84187717437     | 1.0000000000       |  |
| 1 s               |                    |  |
| 0.38160666177     | 1.0000000000       |  |
| 1 s               |                    |  |
| 0.85819911368E-01 | 1.0000000000       |  |
| 1 s               |                    |  |
| 0.32702330370E-01 | 1.0000000000       |  |
| 4 p               |                    |  |
| 3.0700630000      | -0.51025115881     |  |
| 2.2379640000      | 0.53570598017      |  |
| 0.80801969671     | 0.63102216351      |  |
| 0.35783343432     | 0.30205908942      |  |
| 1 p               |                    |  |
| 0.13820085283     | 1.0000000000       |  |
| 1 p               |                    |  |
| 0.36000000000E-01 | 1.0000000000       |  |
| 4 d               |                    |  |
| 4.6170975867      | -0.13574476955E-01 |  |
| 1.5663438480      | 0.20374310496      |  |
| 0.66952425826     | 0.42997453105      |  |
| 0.27140946867     | 0.41799754848      |  |
| 1 d               |                    |  |
| 0.10054426592     | 1.0000000000       |  |

\*

nb def2-ecp

\*

| #   | ncore = | coefficient | r^n | lmax = | exponent  |
|-----|---------|-------------|-----|--------|-----------|
|     | 28      |             |     | 3      |           |
| f   |         | -22.9295500 | 2   |        | 8.4900000 |
|     |         | -3.6663099  | 2   |        | 4.2500000 |
| s-f |         | 165.1791435 | 2   |        | 8.9000000 |
|     |         | 21.9929744  | 2   |        | 4.4300000 |

|     |             |   |           |
|-----|-------------|---|-----------|
|     | 22.9295500  | 2 | 8.4900000 |
|     | 3.6663099   | 2 | 4.2500000 |
| p-f | 111.7944145 | 2 | 7.7700000 |
|     | 16.6334833  | 2 | 3.9600000 |
|     | 22.9295500  | 2 | 8.4900000 |
|     | 3.6663099   | 2 | 4.2500000 |
| d-f | 38.1122488  | 2 | 6.0500000 |
|     | 8.0391673   | 2 | 2.8400000 |
|     | 22.9295500  | 2 | 8.4900000 |
|     | 3.6663099   | 2 | 4.2500000 |

\*

\*

mo def2-SV(P)

# mo (7s6p5d) / [5s3p2d] {31111/411/41}

\*

|                   |                    |  |
|-------------------|--------------------|--|
| 3 s               |                    |  |
| 7.2033800000      | -0.89310617237     |  |
| 5.0522950000      | 1.6074095756       |  |
| 2.9135330000      | 0.27804186088      |  |
| 1 s               |                    |  |
| 0.97858218681     | 1.0000000000       |  |
| 1 s               |                    |  |
| 0.44369153753     | 1.0000000000       |  |
| 1 s               |                    |  |
| 0.92150090705E-01 | 1.0000000000       |  |
| 1 s               |                    |  |
| 0.34802246935E-01 | 1.0000000000       |  |
| 4 p               |                    |  |
| 3.1518660000      | -0.71873040872     |  |
| 2.4534820000      | 0.76442887870      |  |
| 0.85030192180     | 0.64808585640      |  |
| 0.36918237179     | 0.26792115234      |  |
| 1 p               |                    |  |
| 0.13490627460     | 1.0000000000       |  |
| 1 p               |                    |  |
| 0.38200000000E-01 | 1.0000000000       |  |
| 4 d               |                    |  |
| 5.0044445497      | -0.21587364862E-01 |  |
| 1.7736823324      | 0.20958680086      |  |
| 0.76950591696     | 0.43730880599      |  |
| 0.31530878939     | 0.41123927009      |  |
| 1 d               |                    |  |
| 0.11754374390     | 1.0000000000       |  |

\*

mo def2-ecp

\*

|         |             |        |           |
|---------|-------------|--------|-----------|
| ncore = | 28          | lmax = | 3         |
| #       | coefficient | r^n    | exponent  |
| f       | -24.8051771 | 2      | 9.4500000 |
|         | -4.1537815  | 2      | 4.7200000 |
| s-f     | 180.1031085 | 2      | 9.7145938 |
|         | 24.9972279  | 2      | 4.6805004 |
|         | 24.8051771  | 2      | 9.4500000 |
|         | 4.1537815   | 2      | 4.7200000 |
| p-f     | 123.7727523 | 2      | 8.1421366 |

```

19.5302280    2    4.6259863
24.8051771    2    9.4500000
4.1537815     2    4.7200000
d-f
48.3750223    2    6.6184148
8.8920527     2    3.2487516
24.8051771    2    9.4500000
4.1537815     2    4.7200000
*
*
tc def2-SV(P)
# tc      (7s6p5d) / [5s3p2d]      {31111/411/41}
*
3 s
7.4344020000    -1.1436289973
5.5513270000    1.8752000559
3.0230860000    0.23952854431
1 s
1.0647443990    1.0000000000
1 s
0.48127808497    1.0000000000
1 s
0.98299016952E-01    1.0000000000
1 s
0.36659977936E-01    1.0000000000
4 p
3.4490050000    -0.72277510434
2.6927370000    0.76458962802
0.94427370692    0.64533225171
0.41348148619    0.27195668811
1 p
0.15488152305    1.0000000000
1 p
0.40300000000E-01    1.0000000000
4 d
5.0906268699    -0.32176405405E-01
2.0156178510    0.21280802536
0.88113887240    0.44403309175
0.36427094833    0.40796933085
1 d
0.13678402297    1.0000000000
*
tc def2-ecp
*
ncore =      28          lmax =      3
# coefficient    r^n          exponent
f
-26.5624475     2          10.4000000
-4.5856805      2          5.2000000
s-f
195.1591659     2          10.4223462
28.0926033      2          5.0365160
26.5624475      2          10.4000000
4.5856805        2          5.2000000
p-f
135.2845662     2          8.9504494
21.8065043      2          4.8544394
26.5624475      2          10.4000000
4.5856805        2          5.2000000
d-f

```

|  |            |   |            |
|--|------------|---|------------|
|  | 54.3297294 | 2 | 6.9456968  |
|  | 11.1550679 | 2 | 3.9705849  |
|  | 26.5624475 | 2 | 10.4000000 |
|  | 4.5856805  | 2 | 5.2000000  |

\*  
\*

```

ru def2-SV(P)
# ru      (7s6p5d) / [5s3p2d]      {31111/411/41}
*
  3 s
  7.9365700000      -1.1772083350
  5.9842450000      1.6197059592
  4.8822200000      0.51065807556
  1 s
  1.1031002163      1.0000000000
  1 s
  0.49818875261     1.0000000000
  1 s
  0.10678711393     1.0000000000
  1 s
  0.39191775872E-01 1.0000000000
  4 p
  3.7546090000     -0.70777873563
  2.9165710000     0.74954391484
  1.0322209568     0.64660609645
  0.45249553774    0.27029086816
  1 p
  0.16987042198    1.0000000000
  1 p
  0.430000000000E-01 1.0000000000
  4 d
  5.7341846619     -0.35266111560E-01
  2.2483686294     0.21802502222
  0.98376978359    0.44709565013
  0.40379445583    0.40371732508
  1 d
  0.14978618173    1.0000000000
*
ru def2-ecp
*
  ncore =      28          lmax =      3
#      coefficient      r^n          exponent
f
  -28.3406163      2          11.3600000
  -4.9446292       2          5.6800000
s-f
  209.8229712      2          11.1052693
  30.6547264       2          5.4147454
  28.3406163       2          11.3600000
  4.9446292        2          5.6800000
p-f
  146.3361823      2          9.7712707
  24.1278772       2          5.0739908
  28.3406163       2          11.3600000
  4.9446292        2          5.6800000
d-f
  67.5158967       2          7.6714231
  9.8701041        2          4.1365647
  28.3406163       2          11.3600000
  4.9446292        2          5.6800000

```

```

*
*
rh def2-SV(P)
# rh      (7s6p5d) / [5s3p2d]      {31111/411/41}
*
  3 s
  7.9177440000      1.4014042010
  6.8412070000      -1.7975072656
  2.9598400000      -0.16225754497
  1 s
  1.3166643441      0.87495110714
  1 s
  0.56907152172      1.0000000000
  1 s
  0.10059695193      1.0000000000
  1 s
  0.37071460798E-01  1.0000000000
  4 p
  4.1360790000      -0.55183328018
  2.9462810000      0.61370533515
  1.0792431924      0.64005434538
  0.46611217769      0.25958050755
  1 p
  0.17453169991      1.0000000000
  1 p
  0.41000000000E-01  1.0000000000
  4 d
  6.8847131641      -0.15962387985E-01
  2.3837304391      0.23047555829
  1.0184384022      0.44075804028
  0.39957494644      0.39567661996
  1 d
  0.13951120264      1.0000000000
*
rh def2-ecp
*
  ncore =    28      lmax =    3
#      coefficient  r^n      exponent
f
      -30.0934557    2      12.3100000
      -5.2184819    2      6.1600000
s-f
      225.3477535    2      11.7200000
      32.8231890     2      5.8200000
      30.0934557     2      12.3100000
      5.2184819      2      6.1600000
p-f
      158.7094116    2      10.4200000
      26.4441005     2      5.4500000
      30.0934557     2      12.3100000
      5.2184819      2      6.1600000
d-f
      62.7586257     2      8.8200000
      10.9787195     2      3.8700000
      30.0934557     2      12.3100000
      5.2184819      2      6.1600000
*
*
pd def2-SV(P)
# pd      (7s6p5d) / [5s3p2d]      {31111/411/41}

```

```

*
  3 s
  8.4756400000      1.2392391076
  7.1657170000     -1.6563109970
  3.1821100000     -0.13178619060
  1 s
  1.3973644196      1.0000000000
  1 s
  0.60532955868     1.0000000000
  1 s
  0.10229514209     1.0000000000
  1 s
  0.37338972881E-01  1.0000000000
  4 p
  4.2460970000     -0.82324104973
  3.3925940000      0.87084659933
  1.1975891264      0.63512225791
  0.52673750585     0.27225338752
  1 p
  0.20607094098     1.0000000000
  1 p
  0.37000000000E-01  1.0000000000
  4 d
  7.3613290985     -0.17199885828E-01
  2.6291037258      0.23313745275
  1.1292744634      0.44536385867
  0.44471659896     0.39293650406
  1 d
  0.15544893836     1.0000000000
*
pd def2-ecp
*
ncore =      28      lmax =      3
#      coefficient  r^n      exponent
f      -31.9295543   2      13.2700000
      -5.3982169    2      6.6300000
s-f    240.2290403    2      12.4300000
      35.1719435    2      6.1707594
      31.9295543    2      13.2700000
      5.3982169    2      6.6300000
p-f    170.4172760    2      11.0800000
      28.4721329    2      5.8295541
      31.9295543    2      13.2700000
      5.3982169    2      6.6300000
d-f    69.0138449     2      9.5100000
      11.7508616    2      4.1397811
      31.9295543    2      13.2700000
      5.3982169    2      6.6300000
*
*
ag def2-SV(P)
# ag      (7s6p5d) / [5s3p2d]      {31111/411/41}
*
  3 s
  9.0884420000     -1.9808918797
  7.5407310000     2.7554513347

```

```

2.7940050000      0.22715408381
 1 s
1.4918135849      1.00000000000
 1 s
0.63579159445     1.00000000000
 1 s
0.10368414161     1.00000000000
 1 s
0.37460004363E-01 1.00000000000
 4 p
4.4512400000     -0.99352103771
3.6752630000      1.0500525237
1.2610620905      0.64747532537
0.54212477498     0.25621550723
 1 p
0.20221617026     1.00000000000
 1 p
0.41200000000E-01 1.00000000000
 4 d
7.7956672292     -0.17042912377E-01
2.8926510238      0.23446154803
1.2474273203      0.44765877533
0.49313817671     0.39064954560
 1 d
0.17285032603     1.00000000000
*
ag def2-ecp
*
  ncore =    28      lmax =    3
#      coefficient  r^n      exponent
f
      -33.6899201    2      14.2200000
      -5.5311202    2      7.1100000
s-f
      255.1393645    2      13.1300000
      36.8661215     2      6.5100000
      33.6899201     2      14.2200000
      5.5311202      2      7.1100000
p-f
      182.1818687    2      11.7400000
      30.3577515     2      6.2000000
      33.6899201     2      14.2200000
      5.5311202      2      7.1100000
d-f
      73.7192609     2      10.2100000
      12.5021171     2      4.3800000
      33.6899201     2      14.2200000
      5.5311202      2      7.1100000
*
*
cd def2-SV(P)
# cd      (7s6p5d) / [5s3p2d]      {31111/411/41}
*
  3 s
9.7270110000     -1.7930075316
7.8375230000      2.6110318971
5.0891940000      0.10748428949
 1 s
1.4981738327      1.00000000000
 1 s

```

```

0.67281383129      1.0000000000
 1 s
0.13297424875      1.0000000000
 1 s
0.46915090488E-01  1.0000000000
 4 p
 4.7427160000      -1.0411923051
 3.9366550000      1.1003682332
 1.3569243142      0.65366639411
0.58791569541      0.24632369113
 1 p
0.21371239619      1.0000000000
 1 p
0.51600000000E-01  1.0000000000
 4 d
 7.8631040859      -0.21376239365E-01
 3.2935059133      0.22596399568
 1.4503676025      0.45294402972
0.59373316766      0.39218971958
 1 d
0.21760141520      1.0000000000
*
cd def2-ecp
*
  ncore =      28          lmax =      3
#   coefficient   r^n      exponent
f
  -35.4766256     2          15.1847957
  -5.6176768     2          7.5923978
s-f
  270.0094832    2          13.8358689
  38.7673080     2          6.8572704
  35.4766256     2          15.1847957
  5.6176768     2          7.5923978
p-f
  193.8296294    2          12.4049710
  31.8965252     2          6.5677995
  35.4766256     2          15.1847957
  5.6176768     2          7.5923978
d-f
  79.1936470     2          10.8969253
  13.2308267     2          4.6411649
  35.4766256     2          15.1847957
  5.6176768     2          7.5923978
*
*
in def2-SV(P)
# in      (10s7p6d) / [4s4p2d]      {6211/4111/51}
*
  6 s
  283.52297445    0.70132141424E-03
  23.324282101    -0.90887432418E-01
  16.868026844    0.28096825177
  6.7866498137    -0.70697832452
  1.6782596016    0.98671644913
0.78396870439    0.62568576302
  2 s
  1.8276654775    -0.34151640249
0.83753492534    -0.59696724334
  1 s

```



```

0.16643068973      1.0000000000
 1 s
0.61143742809E-01  1.0000000000
 4 p
14.699191826      0.92248042349E-01
 8.8709038051     -0.32437029300
 1.1342905889     0.61162217018
0.52667652433     0.17609640386
 1 p
 2.3284433667     1.0000000000
 1 p
0.16859144934     1.0000000000
 1 p
0.50070381081E-01 1.0000000000
 5 d
31.378655926      0.54007004722E-02
18.290046326     -0.11208558948E-01
 3.2551894590     0.30384519161
 1.3874842584     0.54078109979
0.54248962672     0.38232680038
 1 d
0.18000000000     1.0000000000
*
in def2-ecp
*
  ncore =    28          lmax =    3
#   coefficient   r^n      exponent
f
    -13.7280780    2         12.5390560
    -18.2068660    2         12.5525610
s-f
    281.1223500    2         15.3928220
    61.9014700    2          8.0558640
    13.7280780    2         12.5390560
    18.2068660    2         12.5525610
p-f
    67.4621540    2         13.9286720
   134.9492500    2         13.3472340
    14.7461400    2          7.6141320
    29.6392620    2          7.3183650
    13.7280780    2         12.5390560
    18.2068660    2         12.5525610
d-f
    35.4932540    2         14.0347150
    53.1787730    2         14.5116160
     9.1772810    2          5.5505500
    12.3924100    2          5.0594150
    13.7280780    2         12.5390560
    18.2068660    2         12.5525610
*
*
sn def2-SV(P)
# sn      (10s7p6d) / [4s4p2d]      {6211/4111/51}
*
  6 s
375.95156177      0.15224884228E-02
23.661818008     -0.16776065030
19.946281315     0.33989090393
 6.8240270454    -0.84441791529
 1.8771488722     0.92646952846

```

```

0.82033199226      0.53091094490
  2 s
10.341549887      -0.90331119154E-02
1.3672524155      0.22980877714
  1 s
0.18314843823      1.00000000000
  1 s
0.69547226146E-01  1.00000000000
  4 p
21.293597748      0.37103218279E-01
8.8171842499      -0.32351709661
1.2347028371      0.83846760898
0.57869142617      0.23294977050
  1 p
2.5084050284      1.00000000000
  1 p
0.21298577719      1.00000000000
  1 p
0.67364584657E-01  1.00000000000
  5 d
39.693023177      0.39185734275E-02
20.852179275      -0.68210073667E-02
3.6907832774      0.27938420495
1.5849404530      0.52607409874
0.62772693365      0.36149465348
  1 d
0.20500000000      1.00000000000
*
sn def2-ecp
*
  ncore =    28      lmax =    3
#      coefficient  r^n      exponent
f
      -12.5763330   2      12.2823480
      -16.5959440   2      12.2721500
s-f
      279.9886820   2      17.4204140
      62.3778100   2      7.6311550
      12.5763330   2      12.2823480
      16.5959440   2      12.2721500
p-f
      66.1625230   2      16.1310240
      132.1743960   2      15.6280770
      16.3394170   2      7.3256080
      32.4889590   2      6.9425190
      12.5763330   2      12.2823480
      16.5959440   2      12.2721500
d-f
      36.3874410   2      15.5149760
      54.5078410   2      15.1881600
      8.6968230    2      5.4560240
      12.8402080   2      5.3631050
      12.5763330   2      12.2823480
      16.5959440   2      12.2721500
*
*
sb def2-SV(P)
# sb      (10s7p6d) / [4s4p2d]      {6211/4111/51}
*
  6 s

```

|                   |                    |
|-------------------|--------------------|
| 372.76139166      | 0.15878057239E-02  |
| 22.689478596      | -0.15027605583     |
| 18.391547037      | 0.35915813039      |
| 7.6406271414      | -0.74805091065     |
| 1.9052000235      | 0.92017581656      |
| 0.93007107773     | 0.46754079597      |
| 2 s               |                    |
| 10.584496987      | -0.14845336778E-01 |
| 1.4680242769      | 0.35289492025      |
| 1 s               |                    |
| 0.21621190032     | 1.0000000000       |
| 1 s               |                    |
| 0.83546307041E-01 | 1.0000000000       |
| 4 p               |                    |
| 15.926550950      | 0.13206950012      |
| 10.052739237      | -0.41511149340     |
| 1.2682183726      | 0.74197972626      |
| 0.57196620929     | 0.15580772750      |
| 1 p               |                    |
| 2.6190751238      | 1.0000000000       |
| 1 p               |                    |
| 0.25183282652     | 1.0000000000       |
| 1 p               |                    |
| 0.83389127684E-01 | 1.0000000000       |
| 5 d               |                    |
| 45.485063360      | 0.32556415807E-02  |
| 18.504059617      | -0.54952972010E-02 |
| 3.9156032308      | 0.27988806353      |
| 1.7142196009      | 0.51273377761      |
| 0.69675478242     | 0.33288802736      |
| 1 d               |                    |
| 0.23060000000     | 1.0000000000       |

\*

sb def2-ecp

\*

| #   | ncore = 28 | lmax = 3 | coefficient | r^n | exponent   |
|-----|------------|----------|-------------|-----|------------|
| f   |            |          | -15.3668010 | 2   | 14.4449780 |
|     |            |          | -20.2961380 | 2   | 14.4492950 |
| s-f |            |          | 281.0715810 | 2   | 16.3308650 |
|     |            |          | 61.7166040  | 2   | 8.5565420  |
|     |            |          | 15.3668010  | 2   | 14.4449780 |
|     |            |          | 20.2961380  | 2   | 14.4492950 |
| p-f |            |          | 67.4573800  | 2   | 14.4703370 |
|     |            |          | 134.9335030 | 2   | 13.8161940 |
|     |            |          | 14.7163440  | 2   | 8.4249240  |
|     |            |          | 29.5185120  | 2   | 8.0927280  |
|     |            |          | 15.3668010  | 2   | 14.4449780 |
|     |            |          | 20.2961380  | 2   | 14.4492950 |
| d-f |            |          | 35.4478150  | 2   | 14.8863310 |
|     |            |          | 53.1434660  | 2   | 15.1463190 |
|     |            |          | 9.1792230   | 2   | 5.9082670  |
|     |            |          | 13.2402530  | 2   | 5.5943220  |
|     |            |          | 15.3668010  | 2   | 14.4449780 |
|     |            |          | 20.2961380  | 2   | 14.4492950 |

\*

```

*
te def2-SV(P)
# te      (10s7p6d) / [4s4p2d]      {6211/4111/51}
*
  6 s
396.47954659      0.26307731203E-02
21.919773309     -0.13203517066
18.061271390     0.36203197834
8.1403463241     -0.75591120276
2.0705998798     0.79192928400
0.97715185085    0.40558342540
  2 s
11.263563841     -0.15212984183E-01
1.6122696062     0.35202140517
  1 s
0.25095401705    1.00000000000
  1 s
0.97478452576E-01 1.00000000000
  4 p
17.479502221     0.11517799182
10.433943171     -0.41205302672
1.3623024763     0.78760578076
0.59239616258    0.15283299018
  1 p
2.7961737670     1.00000000000
  1 p
0.29766401026    1.00000000000
  1 p
0.96151090240E-01 1.00000000000
  5 d
50.821835991     0.33763474774E-02
18.884095378     -0.35221408938E-02
4.2527304630     0.28254216065
1.8757557092     0.52039372916
0.77069282849    0.32213541689
  1 d
0.25000000000    1.00000000000
*
te def2-ecp
*
  ncore =      28      lmax =      3
#      coefficient      r^n      exponent
f
      -15.7454500      2      15.2061680
      -20.7424480      2      15.2017020
s-f
      281.0458430      2      16.8144730
      61.6206560      2      8.7935260
      15.7454500      2      15.2061680
      20.7424480      2      15.2017020
p-f
      67.4494640      2      14.8778010
      134.9043040      2      14.2697310
      14.6895470      2      8.7244350
      29.4150630      2      8.2915150
      15.7454500      2      15.2061680
      20.7424480      2      15.2017020
d-f
      35.4320570      2      15.2050080
      53.1356870      2      15.2258480

```

```

          9.0698020    2          6.0717690
          13.1223040    2          5.8047600
          15.7454500    2          15.2061680
          20.7424480    2          15.2017020
*
*
i def2-SV(P)
# i      (10s7p6d) / [4s4p2d]      {6211/4111/51}
*
  6 s
445.90489176      0.20037290389E-02
23.336842412     -0.14989397324
19.583446104      0.36436474913
8.5112089186     -0.75538138199
2.1996161861      0.82816359356
1.0668970454      0.42161048110
  2 s
11.720547572     -0.16160234511E-01
1.7625986449      0.35271525193
  1 s
0.28697476318      1.00000000000
  1 s
0.11227609607      1.00000000000
  4 p
20.499027254      0.77159335656E-01
10.558754576     -0.38370372780
1.5015895485      0.83554174719
0.64597173095      0.16787259488
  1 p
3.0288656771      1.00000000000
  1 p
0.34506591841      1.00000000000
  1 p
0.11134513813      1.00000000000
  5 d
51.235354920      0.40345130346E-02
15.616239482     -0.50768108881E-02
4.5266002139      0.29151065356
2.0529808766      0.51145783605
0.87640281623      0.31232025297
  1 d
0.30900000000      1.00000000000
*
i def2-ecp
*
  ncore =    28          lmax =    3
#      coefficient      r^n          exponent
f
      -21.8420400      2          19.4586090
      -28.4681910      2          19.3492600
      -0.2437130      2          4.8237670
      -0.3208040      2          4.8843150
s-f
      49.9942930      2          40.0158350
      281.0253170      2          17.4297470
      61.5733260      2          9.0054840
      21.8420400      2          19.4586090
      28.4681910      2          19.3492600
      0.2437130      2          4.8237670
      0.3208040      2          4.8843150

```

```

p-f
    67.4428410    2    15.3554660
    134.8811370   2    14.9718330
    14.6750510    2    8.9601640
    29.3756660    2    8.2590960
    21.8420400    2    19.4586090
    28.4681910    2    19.3492600
    0.2437130     2    4.8237670
    0.3208040     2    4.8843150

d-f
    35.4395290    2    15.0689080
    53.1760570    2    14.5553220
    9.0671950     2    6.7186470
    13.2069370    2    6.4563930
    0.0893350     2    1.1917790
    0.0523800     2    1.2911570
    21.8420400    2    19.4586090
    28.4681910    2    19.3492600
    0.2437130     2    4.8237670
    0.3208040     2    4.8843150

```

\*

\*

```

xe def2-SV(P)
# xe (11s10p8d2f) / [6s5p3d2f] {521111/34111/611/11}

```

\*

```

5 s
6420.2481656    0.25092173886E-03
983.54530664    0.16251948178E-02
219.43881364    0.46037106451E-02
23.012587807    -0.14698707182
18.048324490    0.57524870348
2 s
11.752550163    0.66038420156
6.2390917199    0.38470524721
1 s
2.6257211320    1.0000000000
1 s
1.2905042943    1.0000000000
1 s
0.36204185060    1.0000000000
1 s
0.14069888091    1.0000000000
3 p
193.81432545    0.95394802497E-03
21.725228086    0.57393353332E-01
9.8891605641    -0.27974266640
4 p
13.960683826    -0.50950157807E-01
4.0928947097    0.36669211800
2.2546815460    0.72619456861
1.1546596184    0.35555871740
1 p
0.52321923128    1.0000000000
1 p
0.21945569800    1.0000000000
1 p
0.86158996836E-01 1.0000000000
6 d
135.60300038    0.81873543290E-03
38.727062692    0.60897654151E-02

```

```

15.377328089      -0.92782985596E-02
5.2602537686      0.22890785589
2.6590627424      0.44434407051
1.2938205124      0.36029482992
 1 d
0.58050830139      1.0000000000
 1 d
0.18000000000      1.0000000000
 1 f
0.49652793000      1.0000000000
 1 f
2.50000000000      1.0000000000
*
xe def2-ecp
*
  ncore =    28          lmax =    3
#   coefficient   r^n      exponent
f
  -23.0892950     2         20.8815570
  -30.0744750     2         20.7834430
   -0.2882270     2          5.2533890
   -0.3869240     2          5.3611880
s-f
   49.9979620     2         40.0051840
  281.0133030     2         17.8122140
   61.5382550     2          9.3041500
   23.0892950     2         20.8815570
   30.0744750     2         20.7834430
    0.2882270     2          5.2533890
    0.3869240     2          5.3611880
p-f
   67.4391420     2         15.7017720
  134.8747110     2         15.2586080
   14.6633000     2          9.2921840
   29.3547300     2          8.5590030
   23.0892950     2         20.8815570
   30.0744750     2         20.7834430
    0.2882270     2          5.2533890
    0.3869240     2          5.3611880
d-f
   35.4369080     2         15.1856000
   53.1957720     2         14.2845000
    9.0462320     2          7.1218890
   13.2236810     2          6.9919630
    0.0848530     2          0.6239460
    0.0441550     2          0.6472840
   23.0892950     2         20.8815570
   30.0744750     2         20.7834430
    0.2882270     2          5.2533890
    0.3869240     2          5.3611880
*
*
cs def2-SV(P)
# cs      (7s6p2d) / [5s3p2d]      {31111/411/11}
*
  3 s
5.8778113443      0.12859994983
4.3631538286      -0.34632569725
1.8048475155      0.69930637051
 1 s

```

```

0.37485237136      1.0000000000
 1 s
0.16384858778      1.0000000000
 1 s
0.27230462048E-01  1.0000000000
 1 s
0.11991533212E-01  1.0000000000
 4 p
 4.2751856154      0.45723074174E-01
 1.9656663360      -0.25019961976
0.47689195212      0.55660850066
0.21529749588      0.58218553406
 1 p
0.91450850296E-01  1.0000000000
 1 p
0.17592078473E-01  1.0000000000
 1 d
0.13300000000      1.0000000000
 1 d
0.33216214821E-01  1.0000000000
*
cs def2-ecp
*
ncore =    46          lmax =    3
# coefficient  r^n      exponent
f          -28.8843090    2          3.1232690
s-f          84.5477300    2          4.0797500
           16.6541730    2          2.4174060
           28.8843090    2          3.1232690
p-f          157.0490590    2          5.5140800
           26.4233070    2          2.1603160
           28.8843090    2          3.1232690
d-f          13.1727530    2          1.8074100
           3.3428330    2          0.8581820
           28.8843090    2          3.1232690
*
*
ba def2-SV(P)
# ba      (6s6p5d) / [4s3p2d]      {3111/411/41}
*
 3 s
 2.3961900000      -5.9554766710
 2.2433050000      6.6805648241
0.71740200000      -0.57055347037
 1 s
0.27420073547      1.0000000000
 1 s
0.40933264188E-01  1.0000000000
 1 s
0.18060156423E-01  1.0000000000
 4 p
 2.9267420000      0.79815276764
 2.5207180000      -1.0707548832
0.67578180854      0.34940781448
0.31985844531      0.65041110673
 1 p

```



```

0.13221792446      1.0000000000
  1 p
0.33039565349E-01  1.0000000000
  4 d
0.96631500000     -0.90893800000
0.89382800000     0.94724000000
0.27319500000     0.32205700000
0.10389100000     0.47326000000
  1 d
0.35578000000E-01  0.36597700000
*
ba def2-ecp
*
  ncore =      46      lmax =      3
#      coefficient  r^n      exponent
f      -33.4731740    2      3.5894650
s-f      427.8458160    2      9.5269860
      204.4175300    2      4.4875100
      33.4731740    2      3.5894650
p-f      293.6058640    2      8.3159300
      294.1933160    2      4.2922170
      33.4731740    2      3.5894650
d-f      112.5504020    2      5.9161080
      181.7826210    2      2.8748420
      33.4731740    2      3.5894650
*
*
la def2-SV(P)
# la      (7s6p5d) / [6s3p2d]      {211111/411/41}
*
  2 s
  5.0873990000     -0.44173707857
  4.2709780000     0.85812489720
  1 s
  2.1823803999     1.00000000000
  1 s
0.48954926461     1.00000000000
  1 s
0.23292032550     1.00000000000
  1 s
0.55595529876E-01  1.00000000000
  1 s
0.22795184937E-01  1.00000000000
  4 p
  3.0251610000     -0.28580266655
  2.3820950000     0.51718364644
0.67246658081     -0.44823115995
0.32519427171     -0.58864843930
  1 p
0.13635489374     1.00000000000
  1 p
0.25100000000E-01  1.00000000000
  4 d
  1.2667182018     -0.17445579381
0.89049882672     0.25137236211
0.32947291040     0.44604068240

```

```

0.13398788830      0.44878277154
  1 d
0.51275503081E-01  1.0000000000
*
la def2-ecp
*
  ncore =    46      lmax =    3
#   coefficient   r^n      exponent
f
  -36.0100160     2        4.0286000
s-f
  91.9321770     2        3.3099000
  -3.7887640     2        1.6550000
  36.0100160     2        4.0286000
p-f
  63.7594860     2        2.8368000
  -0.6479580     2        1.4184000
  36.0100160     2        4.0286000
d-f
  36.1161730     2        2.0213000
  0.2191140     2        1.0107000
  36.0100160     2        4.0286000
*
*
hf def2-SV(P)
# hf      (7s6p5d) / [6s3p2d]      {211111/411/41}
*
  2 s
  14.592485000    -0.80196298812
  11.547491000    1.5261602829
  1 s
  4.9112973928    1.0000000000
  1 s
  0.79665469409    1.0000000000
  1 s
  0.34234072894    1.0000000000
  1 s
  0.98109197714E-01  1.0000000000
  1 s
  0.36190984443E-01  1.0000000000
  4 p
  6.7265310000    0.65076205466
  5.9599790000    -0.83713508620
  1.0921117054    0.50570506286
  0.49702823217    0.51965388691
  1 p
  0.20258973792    1.0000000000
  1 p
  0.33600000000E-01  1.0000000000
  4 d
  3.9820623229    -0.42446023944E-01
  1.3077987772    0.18409232564
  0.53272310298    0.41484423516
  0.20564954488    0.44224303497
  1 d
  0.73099858787E-01  1.0000000000
*
hf def2-ecp
*
  ncore =    60      lmax =    3

```

```

#      coefficient  r^n      exponent
f      10.0467225   2        1.7857698
s-f    1499.2847107  2        14.7699590
      40.2821014    2        7.3849794
      -10.0467225  2        1.7857698
p-f    397.7330053   2        9.8494895
      19.3164059   2        4.9247445
      -10.0467225  2        1.7857698
d-f    101.3298053   2        6.0967564
      5.8734382    2        3.0483782
      -10.0467225  2        1.7857698
*
*
ta def2-SV(P)
# ta      (7s6p5d) / [6s3p2d]      {211111/411/41}
*
  2 s
  14.400000000  0.99343296745
  12.000000000 -1.6510077975
  1 s
  5.0701477302  1.0000000000
  1 s
  0.86033356487 1.0000000000
  1 s
  0.37158938894 1.0000000000
  1 s
  0.10745336254 1.0000000000
  1 s
  0.39142776556E-01 1.0000000000
  4 p
  7.4188720000  0.26979695152
  5.6984100000 -0.46968874449
  1.1777211960  0.50905100155
  0.54478533555  0.52298161137
  1 p
  0.22309270117  1.0000000000
  1 p
  0.43100000000E-01 1.0000000000
  4 d
  3.9738796278 -0.52799310714E-01
  1.4528884813  0.18558319471
  0.61042908544  0.42959071631
  0.24216276510  0.43497228232
  1 d
  0.87909318337E-01 1.0000000000
*
*
ta def2-ecp
*
  ncore = 60      lmax = 3
#      coefficient  r^n      exponent
f      12.0179609   2        2.0178811
s-f    1345.8806470  2        14.5464077
      36.7668062    2        7.2732038
      -12.0179609   2        2.0178811

```

```

p-f      378.4253015   2      9.9355653
         22.2930909   2      4.9677824
        -12.0179609   2      2.0178811
d-f      104.8839557   2      6.3473769
         8.7558481    2      3.1736885
        -12.0179609   2      2.0178811
*
*
w def2-SV(P)
# w      (7s6p5d) / [6s3p2d]      {211111/411/41}
*
  2 s
 15.000000000      -0.53315505392
 12.000000000      1.0014141748
  1 s
 5.2610967725     1.0000000000
  1 s
0.92785370307     1.0000000000
  1 s
0.40334458241     1.0000000000
  1 s
0.11585976646     1.0000000000
  1 s
0.41800474073E-01 1.0000000000
  4 p
 7.2496570000     0.45857265530
 6.0848760000     -0.66720686321
 1.2523777812     0.52090351989
0.58569208922     0.51885687511
  1 p
0.24106964301     1.0000000000
  1 p
0.40300000000E-01 1.0000000000
  4 d
 4.0131231332     -0.63416491808E-01
 1.6237452450     0.18452733732
0.69187452392     0.44121676843
0.27865835325     0.43158409241
  1 d
0.10225296446     1.0000000000
*
w def2-ecp
*
  ncore =    60      lmax =    3
#      coefficient  r^n      exponent
f
      14.1525795    2      2.2588885
s-f
1192.3958823      2      14.3228564
 32.5229332       2      7.1614281
-14.1525795       2      2.2588885
p-f
 359.0319671      2      10.0216411
 24.0303802       2      5.0108204
-14.1525795       2      2.2588885
d-f
 108.3013490      2      6.5979974
 10.9825283       2      3.2989987

```

```

-14.1525795      2      2.2588885
*
*
re def2-SV(P)
# re      (7s6p5d) / [6s3p2d]      {211111/411/41}
*
  2 s
 14.781862000      -1.1395193885
 12.324075000      1.9371421121
  1 s
  5.5098597284      1.0000000000
  1 s
 0.98874104687      1.0000000000
  1 s
 0.42833312030      1.0000000000
  1 s
 0.12296804533      1.0000000000
  1 s
 0.43949851581E-01  1.0000000000
  4 p
  7.4040050000      0.54510937865
  6.3502060000      -0.76096056536
  1.3311713455      0.53252276765
 0.62659600547      0.51483045040
  1 p
 0.25922718696      1.0000000000
  1 p
 0.483000000000E-01  1.0000000000
  4 d
  4.0616274916      -0.76667295205E-01
  1.8487943286      0.18067495215
 0.78702048429      0.45160766937
 0.32069843172      0.43261236266
  1 d
 0.11892742980      1.0000000000
*
re def2-ecp
*
  ncore =      60      lmax =      3
#      coefficient      r^n      exponent
f
      16.4498523      2      2.5086506
s-f
      1038.9515723      2      14.0993051
      29.5617383      2      7.0496525
      -16.4498523      2      2.5086506
p-f
      339.5435096      2      10.1077169
      24.9136965      2      5.0538583
      -16.4498523      2      2.5086506
d-f
      111.6996527      2      6.8486179
      12.6243293      2      3.4243090
      -16.4498523      2      2.5086506
*
*
os def2-SV(P)
# os      (7s6p5d) / [6s3p2d]      {211111/411/41}
*
  2 s

```

```

15.286736000      -1.0647114485
12.700638000      1.8433193269
 1 s
5.7094832504      1.0000000000
 1 s
1.0689228744      1.0000000000
 1 s
0.46783543749     1.0000000000
 1 s
0.13253456992     1.0000000000
 1 s
0.47101982911E-01 1.0000000000
 4 p
7.9362790000      0.33899369659
6.3036410000      -0.56379438345
1.4351579676      0.52360040577
0.68442749722     0.52445339821
 1 p
0.28347394974     1.0000000000
 1 p
0.58100000000E-01 1.0000000000
 4 d
3.5808150000      -0.42773932262
3.1961650000      0.44501403992
1.0550226354      0.43689459722
0.41588406618     0.48220605799
 1 d
0.14653507868     1.0000000000
*
os def2-ecp
*
  ncore =      60          lmax =      3
#      coefficient      r^n          exponent
f
      18.9094570      2          2.7670751
s-f
      885.4057191      2          13.8757539
      25.9670401      2          6.9378769
      -18.9094570      2          2.7670751
p-f
      320.0839019      2          10.1937926
      26.1487649      2          5.0968962
      -18.9094570      2          2.7670751
d-f
      115.0448431      2          7.0992385
      13.6225746      2          3.5496192
      -18.9094570      2          2.7670751
*
*
ir def2-SV(P)
# ir      (7s6p5d) / [6s3p2d]      {2111111/411/41}
*
  2 s
15.293709000      -1.6731899791
13.573682000      2.3934378976
 1 s
5.8213436542      1.0000000000
 1 s
1.1520364268      1.0000000000
 1 s

```

```

0.51104895338      1.0000000000
 1 s
0.14084043578      1.0000000000
 1 s
0.49828673085E-01  1.0000000000
 4 p
 8.6697960000      0.21469187346
 6.2456140000      -0.44863071815
 1.5657036153      0.50653393257
0.75577412863      0.54052273352
 1 p
0.31306011113      1.0000000000
 1 p
0.54800000000E-01  1.0000000000
 4 d
 3.6994850000      -0.54840155965
 3.3617430000      0.56835425804
 1.1177053710      0.44304381513
0.44322534858      0.47078394930
 1 d
0.15641305125      1.0000000000
*
ir def2-ecp
*
  ncore =    60          lmax =    3
#   coefficient  r^n      exponent
f
      21.5310311      2          3.0340719
s-f
      732.2691998      2          13.6522026
      26.4847209      2          6.8261013
      -21.5310311      2          3.0340719
p-f
      299.4894736      2          10.2798684
      26.4662335      2          5.1399341
      -21.5310311      2          3.0340719
d-f
      124.4575945      2          7.3498590
      14.0359952      2          3.6749295
      -21.5310311      2          3.0340719
*
*
pt def2-SV(P)
# pt      (7s6p5d) / [6s3p2d]      {211111/411/41}
*
  2 s
 16.559563000      -0.53808800717
 13.892440000      0.91402161377
 1 s
 5.8531044732      1.0000000000
 1 s
 1.2498640609      1.0000000000
 1 s
0.55606439459      1.0000000000
 1 s
0.13793093812      1.0000000000
 1 s
0.48989034059E-01  1.0000000000
 4 p
 8.1000000000      0.72955608128

```

```

7.20000000000 -0.95441807252
1.5588402917 0.57140490320
0.73230402180 0.49508234268
1 p
0.30270484669 1.00000000000
1 p
0.50000000000E-01 1.00000000000
4 d
4.6299536825 -0.87774450596E-01
2.1980241252 0.21158360681
0.93629991261 0.46533857641
0.37160028160 0.41129165525
1 d
0.13155928617 1.00000000000
*
pt def2-ecp
*
ncore = 60 lmax = 3
# coefficient r^n exponent
f
24.3143757 2 3.3095686
s-f
579.2238609 2 13.4286513
29.6694906 2 6.7143256
-24.3143757 2 3.3095686
p-f
280.8607742 2 10.3659442
26.7453820 2 5.1829721
-24.3143757 2 3.3095686
d-f
120.3964443 2 7.6004795
15.8109206 2 3.8002397
-24.3143757 2 3.3095686
*
*
au def2-SV(P)
# au (7s6p5d) / [6s3p2d] {211111/411/41}
*
2 s
20.115299000 -0.15910719389
12.193477000 0.79105526778
1 s
6.0735294368 1.00000000000
1 s
1.3174451569 1.00000000000
1 s
0.58596768244 1.00000000000
1 s
0.13875427354 1.00000000000
1 s
0.48876985527E-01 1.00000000000
4 p
8.6096650000 0.50053018599
7.3353260000 -0.72681584494
1.6575296365 0.57315511417
0.78159310216 0.49579068859
1 p
0.32384840661 1.00000000000
1 p
0.54000000000E-01 1.00000000000

```



```

4 d
4.1439490000 -0.37099566643
3.5682570000 0.40197233762
1.2345757130 0.46001988624
0.48190232338 0.46152130958
1 d
0.16490636769 1.00000000000
*
au def2-ecp
*
ncore = 60 lmax = 3
# coefficient r^n exponent
f
30.4900889 2 4.7898200
5.1710738 2 2.3949100
s-f
426.8466792 2 13.2051000
37.0070829 2 6.6025500
-30.4900889 2 4.7898200
-5.1710738 2 2.3949100
p-f
261.1995804 2 10.4520200
26.9624960 2 5.2260100
-30.4900889 2 4.7898200
-5.1710738 2 2.3949100
d-f
124.7906656 2 7.8511000
16.3007257 2 3.9255500
-30.4900889 2 4.7898200
-5.1710738 2 2.3949100
*
*
hg def2-SV(P)
# hg (7s6p5d) / [6s3p2d] {211111/411/41}
*
2 s
26.842049000 -0.26845096483E-01
10.320909000 0.81771278143
1 s
6.3656242291 1.00000000000
1 s
1.3898932095 1.00000000000
1 s
0.63706742699 1.00000000000
1 s
0.16047725098 1.00000000000
1 s
0.56410423453E-01 1.00000000000
4 p
9.7729900000 0.21210940502
7.1690950000 -0.44026342153
1.7559567931 0.58406314464
0.83145670425 0.49359746203
1 p
0.34494917659 1.00000000000
1 p
0.70000000000E-01 1.00000000000
4 d
4.2800000000 -0.32033414305
3.4800000000 0.37748470203

```

```

1.2535869926      0.48342275878
0.50841366863    0.43493523158
  l  d
0.18501599388    1.00000000000
*
hg def2-ecp
*
  ncore =      60      lmax =      3
#      coefficient  r^n      exponent
f
      30.3649964      2      3.8857911
s-f
      275.7372117      2      12.9815487
      49.0892125      2      6.4907744
      -30.3649964      2      3.8857911
p-f
      241.5400740      2      10.5380958
      27.3965908      2      5.2690479
      -30.3649964      2      3.8857911
d-f
      127.8670076      2      8.1017205
      16.6083115      2      4.0508603
      -30.3649964      2      3.8857911
*
*
t1 def2-SV(P)
# t1      (10s7p6d) / [4s4p2d]      {6211/4111/51}
*
  6  s
45.356924655      0.50938157397E-02
20.278843336      -0.14805704314
14.420612394      0.36768453564
6.2161909754      -0.66820394623
1.5002511178      0.96232806743
0.76330879305      0.33175999361
  2  s
7.8193195283      -0.18828631537E-01
1.3176904042      0.32093431467
  1  s
0.17643545481      1.00000000000
  1  s
0.65296835238E-01  1.00000000000
  4  p
9.0323058024      0.22738839085
7.5356419671      -0.35117975889
1.0521421998      0.25690085604
0.50303932656      0.84549942764E-01
  1  p
2.0067660913      1.00000000000
  1  p
0.16675605056      1.00000000000
  1  p
0.48596401464E-01  1.00000000000
  5  d
9.4421940760      0.58250776986E-01
7.4410003381      -0.11789199301
1.9831617772      0.34232057636
0.91671748567      0.47557282350
0.39647207885      0.30528029435
  1  d

```

```

0.15500000000      1.0000000000
*
t1 def2-ecp
*
ncore =      60      lmax =      3
# coefficient  r^n      exponent
f
      15.8254880      2      5.6263990
      21.1040210      2      5.5489520
      2.9151270      2      2.8749460
      3.8969030      2      2.8214510
s-f
      281.2846630      2      12.1678050
      62.4342510      2      8.2949090
      -15.8254880      2      5.6263990
      -21.1040210      2      5.5489520
      -2.9151270      2      2.8749460
      -3.8969030      2      2.8214510
p-f
      4.6334080      2      7.1514920
      9.3417560      2      5.1728650
      72.2992530      2      9.8910720
      144.5580370      2      9.0033910
      -15.8254880      2      5.6263990
      -21.1040210      2      5.5489520
      -2.9151270      2      2.8749460
      -3.8969030      2      2.8214510
d-f
      35.9430390      2      7.1302180
      53.9095930      2      6.9269060
      10.3819390      2      5.4175700
      15.5838220      2      5.1386810
      -15.8254880      2      5.6263990
      -21.1040210      2      5.5489520
      -2.9151270      2      2.8749460
      -3.8969030      2      2.8214510
*
*
pb def2-SV(P)
# pb      (10s7p6d) / [4s4p2d]      {6211/4111/51}
*
      6 s
      55.727520333      0.29681153058E-02
      20.302912827      -0.14352634362
      14.558628750      0.37554188507
      6.5370530973      -0.67253099800
      1.5933900686      0.95887533909
      0.83051419711      0.32593632538
      2 s
      8.0719473648      -0.20412061217E-01
      1.4165737490      0.32865829049
      1 s
      0.20418933370      1.0000000000
      1 s
      0.77159007761E-01      1.0000000000
      4 p
      9.5531412199      0.20542943990
      7.5327685129      -0.36407590058
      1.1185539567      0.32217481686
      0.53739855255      0.96677743015E-01

```

```

1 p
2.1359869828      1.0000000000
1 p
0.20027494801    1.0000000000
1 p
0.63408011513E-01  1.0000000000
5 d
13.494505735     0.11571042371E-01
7.0609770411    -0.66746645076E-01
2.1581835375     0.33978760942
1.0148541418     0.48523039273
0.44632672920    0.29682924018
1 d
0.17500000000    1.0000000000
*
pb def2-ecp
*
ncore = 60      lmax = 3
# coefficient r^n exponent
f
12.2098920     2      3.8875120
16.1902910     2      3.8119630
s-f
281.2854990    2      12.2963030
62.5202170     2      8.6326340
-12.2098920    2      3.8875120
-16.1902910    2      3.8119630
p-f
72.2768970     2      10.2417900
144.5910830    2      8.9241760
4.7586930      2      6.5813420
9.9406210      2      6.2554030
-12.2098920    2      3.8875120
-16.1902910    2      3.8119630
d-f
35.8485070     2      7.7543360
53.7243420     2      7.7202810
10.1152560     2      4.9702640
14.8337310     2      4.5637890
-12.2098920    2      3.8875120
-16.1902910    2      3.8119630
*
*
bi def2-SV(P)
# bi (10s7p6d) / [4s4p2d] {6211/4111/51}
*
6 s
175.19632102    0.80278879028E-03
19.820147783    -0.14624461250
14.960110102    0.37435719885
6.7065785571    -0.68476017748
1.7391967524    0.90967322081
0.94504730591    0.38695797807
2 s
8.4636832909    -0.20037183144E-01
1.5317838545    0.31054408682
1 s
0.23405391503    1.0000000000
1 s
0.90268814613E-01  1.0000000000

```

```

4 p
10.672046293      0.14391258793
7.1992185915     -0.37994608603
1.5359697528     0.53268032065
0.72201275727    0.23037698678
1 p
2.8508661858     1.00000000000
1 p
0.23769418731    1.00000000000
1 p
0.78768140453E-01 1.00000000000
5 d
15.834273510     0.85062993231E-02
7.0956896087    -0.65954380016E-01
2.3363137007     0.33707163406
1.1208861366     0.49128719933
0.50309487376    0.29095930644
1 d
0.20000000000    1.00000000000
*
bi def2-ecp
*
ncore =      60          lmax =      3
#      coefficient      r^n          exponent
f
      13.7133830      2          4.2145460
      18.1943080      2          4.1334000
s-f
      283.2642270      2          13.0430900
      62.4719590      2          8.2216820
      -13.7133830      2          4.2145460
      -18.1943080      2          4.1334000
p-f
      72.0014990      2          10.4677770
      144.0022770      2          9.1189010
      5.0079450      2          6.7547910
      9.9915500      2          6.2525920
      -13.7133830      2          4.2145460
      -18.1943080      2          4.1334000
d-f
      36.3962590      2          8.0814740
      54.5976640      2          7.8905950
      9.9842940      2          4.9555560
      14.9814850      2          4.7045590
      -13.7133830      2          4.2145460
      -18.1943080      2          4.1334000
*
*
po def2-SV(P)
# po      (10s7p6d) / [4s4p2d]      {6211/4111/51}
*
6 s
278.13783916     0.91690497839E-03
19.659291105     -0.14713009283
15.016229647     0.38790413631
7.1149978720     -0.67059966298
1.7879214122     0.91212928327
0.94021655206    0.29153755200
2 s
8.7584161749     -0.21561417525E-01

```

```

1.6503945866      0.31638990001
 1 s
0.26329582133      1.00000000000
 1 s
0.10190654304      1.00000000000
 4 p
10.445945973       0.23631841405
 8.0293101888      -0.45017818996
 1.3588798023       0.44160334658
0.66829182929       0.14575285544
 1 p
 2.4460635387       1.00000000000
 1 p
0.27242942777       1.00000000000
 1 p
0.88796031338E-01   1.00000000000
 5 d
18.292670150        0.72030963652E-02
 7.1695578539       -0.66160544754E-01
 2.5029225180        0.34363449378
 1.2115945443        0.50529101033
0.54713334240       0.28301155453
 1 d
0.21500000000       1.00000000000

```

\*

po def2-ecp

\*

```

ncore = 60          lmax = 3
#      coefficient   r^n      exponent
f
      17.4282950      2          5.0132700
      23.3803530      2          4.9846400
      0.1633920       2          1.3267600
      0.3245660       2          1.5287580
s-f
      283.2447060      2          13.2772270
      62.3964610       2          8.3995180
      -17.4282950      2          5.0132700
      -23.3803530      2          4.9846400
      -0.1633920       2          1.3267600
      -0.3245660       2          1.5287580
p-f
      71.9917160       2          10.6656820
      143.9718710      2          9.2837530
      4.9496150        2          6.8727490
      9.7404990         2          6.3261500
      -17.4282950      2          5.0132700
      -23.3803530      2          4.9846400
      -0.1633920       2          1.3267600
      -0.3245660       2          1.5287580
d-f
      36.3783830       2          8.2148660
      54.5627150       2          8.0086960
      9.8894990         2          5.0552270
      14.6938770       2          4.7825530
      -17.4282950      2          5.0132700
      -23.3803530      2          4.9846400
      -0.1633920       2          1.3267600
      -0.3245660       2          1.5287580

```

\*

```

*
at def2-SV(P)
# at      (10s7p6d) / [4s4p2d]      {6211/4111/51}
*
  6 s
303.23376176      0.63504969788E-03
20.289449240     -0.13823165350
15.383783126      0.38333193283
7.4702184232     -0.66837560338
1.8731608346      0.91545877992
0.97426847543     0.25559567998
  2 s
8.9610112498     -0.23092977605E-01
1.7804284294      0.31690635939
  1 s
0.29269461143      1.0000000000
  1 s
0.11395353119      1.0000000000
  4 p
10.722023134      0.26194870008
8.4823338656     -0.46607228264
1.3474291294      0.42119853309
0.62824011467     0.10643224457
  1 p
2.4814896839      1.0000000000
  1 p
0.31036518470      1.0000000000
  1 p
0.10144862043      1.0000000000
  5 d
20.799819604      0.65227965381E-02
7.1664616770     -0.67780885217E-01
2.6934397048      0.33954991335
1.3175112423      0.50899559178
0.59997066293     0.27526771759
  1 d
0.23500000000      1.0000000000
*
at def2-ecp
*
  ncore =      60      lmax =      3
#      coefficient      r^n      exponent
f
      19.8701980      2      5.8121630
      26.4164520      2      5.7537150
      0.9949700      2      2.5134720
      1.4907010      2      2.5362610
s-f
      49.9571580      2      30.2008320
      283.2103710      2      13.6123060
      62.2810520      2      8.5293400
      -19.8701980      2      5.8121630
      -26.4164520      2      5.7537150
      -0.9949700      2      2.5134720
      -1.4907010      2      2.5362610
p-f
      71.9823710      2      10.8540650
      143.9035320      2      9.4682290
      4.8717590      2      7.0311140
      8.9830590      2      6.1438580

```

|               |                           |                    |                       |
|---------------|---------------------------|--------------------|-----------------------|
|               | -19.8701980               | 2                  | 5.8121630             |
|               | -26.4164520               | 2                  | 5.7537150             |
|               | -0.9949700                | 2                  | 2.5134720             |
|               | -1.4907010                | 2                  | 2.5362610             |
| d-f           |                           |                    |                       |
|               | 36.3632370                | 2                  | 8.3135150             |
|               | 54.5489700                | 2                  | 7.9989650             |
|               | 9.7762850                 | 2                  | 5.1799660             |
|               | 14.2647550                | 2                  | 4.9422260             |
|               | -19.8701980               | 2                  | 5.8121630             |
|               | -26.4164520               | 2                  | 5.7537150             |
|               | -0.9949700                | 2                  | 2.5134720             |
|               | -1.4907010                | 2                  | 2.5362610             |
| *             |                           |                    |                       |
| *             |                           |                    |                       |
| rn def2-SV(P) |                           |                    |                       |
| # rn          | (11s10p8d2f) / [6s5p3d2f] |                    | {521111/34111/611/11} |
| *             |                           |                    |                       |
|               | 5 s                       |                    |                       |
|               | 5187.7442468              | 0.16097034848E-03  |                       |
|               | 768.14491207              | 0.10508214789E-02  |                       |
|               | 159.35182065              | 0.27375438093E-02  |                       |
|               | 21.863432724              | -0.55045904905     |                       |
|               | 18.388689978              | 0.78321373922      |                       |
|               | 2 s                       |                    |                       |
|               | 24.816226448              | -0.82636797204E-01 |                       |
|               | 7.2923301677              | 1.0926256000       |                       |
|               | 1 s                       |                    |                       |
|               | 2.0850437166              | 1.0000000000       |                       |
|               | 1 s                       |                    |                       |
|               | 1.0915245945              | 1.0000000000       |                       |
|               | 1 s                       |                    |                       |
|               | 0.34915708428             | 1.0000000000       |                       |
|               | 1 s                       |                    |                       |
|               | 0.13648422952             | 1.0000000000       |                       |
|               | 3 p                       |                    |                       |
|               | 194.68918723              | 0.26265814046E-03  |                       |
|               | 11.210013525              | 0.19952302621      |                       |
|               | 7.5298316489              | -0.45994479561     |                       |
|               | 4 p                       |                    |                       |
|               | 9.0845000304              | -0.23093917426     |                       |
|               | 6.2631489717              | 0.39747614192      |                       |
|               | 2.2545193734              | 0.83026693838      |                       |
|               | 1.1180666918              | 0.51467013112      |                       |
|               | 1 p                       |                    |                       |
|               | 0.47444492594             | 1.0000000000       |                       |
|               | 1 p                       |                    |                       |
|               | 0.20172354616             | 1.0000000000       |                       |
|               | 1 p                       |                    |                       |
|               | 0.79503144392E-01         | 1.0000000000       |                       |
|               | 6 d                       |                    |                       |
|               | 75.302723665              | 0.73590238429E-03  |                       |
|               | 17.965913830              | 0.89490827389E-02  |                       |
|               | 7.3741298033              | -0.76641663693E-01 |                       |
|               | 3.2296258578              | 0.22975404602      |                       |
|               | 1.7937840508              | 0.43991495311      |                       |
|               | 0.94633319732             | 0.35259395198      |                       |
|               | 1 d                       |                    |                       |
|               | 0.46860482223             | 1.0000000000       |                       |
|               | 1 d                       |                    |                       |



```

0.200000000000      1.000000000000
  1 f
0.418060000000      1.000000000000
  1 f
2.100000000000      1.000000000000
*
rn def2-ecp
*
  ncore =    60      lmax =    3
#      coefficient  r^n      exponent
f
      21.7972900    2        6.3485710
      28.9468050    2        6.2959490
      1.4473650    2        2.8821180
      2.1779640    2        2.9080480
s-f
      49.9655510    2        30.1512420
      283.0700000    2        14.5212410
      62.0028700    2        8.0520380
      -21.7972900   2        6.3485710
      -28.9468050   2        6.2959490
      -1.4473650    2        2.8821180
      -2.1779640    2        2.9080480
p-f
      71.9691190    2        11.0099420
      143.8605590    2        9.6176250
      4.7147610     2        7.3360080
      9.0130650     2        6.4062530
      -21.7972900   2        6.3485710
      -28.9468050   2        6.2959490
      -1.4473650    2        2.8821180
      -2.1779640    2        2.9080480
d-f
      36.3683650    2        8.3692200
      54.5517610    2        8.1169750
      9.6344870     2        5.3536560
      14.3879020    2        5.0972120
      -21.7972900   2        6.3485710
      -28.9468050   2        6.2959490
      -1.4473650    2        2.8821180
      -2.1779640    2        2.9080480
*
=====
def2-SVP
=====
*
h def2-SVP
# h      (4s1p) / [2s1p]      {31/1}
*
  3 s
  13.010701000      0.19682158000E-01
  1.9622572000      0.13796524000
  0.44453796000      0.47831935000
  1 s
  0.12194962000      1.00000000000
  1 p
  0.80000000000      1.00000000000
*
*
he def2-SVP

```

```

# he      (4s1p) / [2s1p]      {31/1}
*
  3 s
 38.354936737      0.23814288905E-01
 5.7689081479      0.15490906777
 1.2399407035      0.46998096633
  1 s
0.29757815953      1.00000000000
  1 p
 1.00000000000      1.00000000000
*
*
li def2-SVP
# li      (7s3p) / [3s2p]      {511/21}
*
  5 s
 266.27785516      0.64920150325E-02
 40.069783447      0.47747863215E-01
 9.0559944389      0.20268796111
 2.4503009051      0.48606574817
 0.72209571855      0.43626977955
  1 s
0.52810884721E-01  1.00000000000
  1 s
0.20960948798E-01  1.00000000000
  2 p
 1.45000000000      0.25860000000
 0.30000000000      1.00000000000
  1 p
0.82000000000E-01  1.00000000000
*
*
be def2-SVP
# be      (7s4p) / [3s2p]      {511/31}
*
  5 s
 515.18616125      0.55615307983E-02
 77.511037595      0.41190068062E-01
 17.552481693      0.17913378108
 4.8028940596      0.44736716455
 1.4516214316      0.42009581920
  1 s
0.13281633620      1.00000000000
  1 s
0.45837372213E-01  1.00000000000
  3 p
 3.6316917145      -0.29033998305E-01
 0.71695694366      -0.16877854032
 0.19541932860      -0.51403419628
  1 p
0.60515465890E-01  1.00000000000
*
*
b def2-SVP
# b      (7s4p1d) / [3s2p1d]    {511/31/1}
*
  5 s
 839.31830086      -0.55929201074E-02
 126.26464843      -0.41565520771E-01
 28.620600763      -0.18299816983

```

```

7.8793722710      -0.46540391866
2.4088857172      -0.44173884791
 1 s
0.25105109036      1.00000000000
 1 s
0.83648866069E-01  1.00000000000
 3 p
 6.0332223619      -0.35603672456E-01
 1.2499157866      -0.19895775769
0.33871676350      -0.50850202618
 1 p
0.96415632351E-01  1.00000000000
 1 d
0.50000000000      1.00000000000
*
*
c def2-SVP
# c      (7s4p1d) / [3s2p1d]      {511/31/1}
*
 5 s
1238.4016938      0.54568832082E-02
186.29004992      0.40638409211E-01
42.251176346      0.18025593888
11.676557932      0.46315121755
 3.5930506482      0.44087173314
 1 s
0.40245147363      1.00000000000
 1 s
0.13090182668      1.00000000000
 3 p
 9.4680970621      0.38387871728E-01
 2.0103545142      0.21117025112
0.54771004707      0.51328172114
 1 p
0.15268613795      1.00000000000
 1 d
0.80000000000      1.00000000000
*
*
n def2-SVP
# n      (7s4p1d) / [3s2p1d]      {511/31/1}
*
 5 s
1712.8415853      -0.53934125305E-02
257.64812677      -0.40221581118E-01
58.458245853      -0.17931144990
16.198367905      -0.46376317823
 5.0052600809      -0.44171422662
 1 s
0.58731856571      1.00000000000
 1 s
0.18764592253      1.00000000000
 3 p
13.571470233      -0.40072398852E-01
 2.9257372874      -0.21807045028
0.79927750754      -0.51294466049
 1 p
0.21954348034      1.00000000000
 1 d
1.00000000000      1.00000000000

```

```

*
*
o def2-SVP
# o      (7s4p1d) / [3s2p1d]      {511/31/1}
*
  5 s
  2266.1767785      -0.53431809926E-02
  340.87010191     -0.39890039230E-01
  77.363135167     -0.17853911985
  21.479644940     -0.46427684959
  6.6589433124     -0.44309745172
  1 s
  0.80975975668     1.0000000000
  1 s
  0.25530772234     1.0000000000
  3 p
  17.721504317      0.43394573193E-01
  3.8635505440      0.23094120765
  1.0480920883      0.51375311064
  1 p
  0.27641544411     1.0000000000
  1 d
  1.2000000000      1.0000000000
*
*
f def2-SVP
# f      (7s4p1d) / [3s2p1d]      {511/31/1}
*
  5 s
  2894.8325990      -0.53408255515E-02
  435.41939120      -0.39904258866E-01
  98.843328866      -0.17912768038
  27.485198001      -0.46758090825
  8.5405498171      -0.44653131020
  1 s
  1.0654578038      1.0000000000
  1 s
  0.33247346748     1.0000000000
  3 p
  22.696633924      -0.45212874436E-01
  4.9872339257      -0.23754317067
  1.3491613954      -0.51287353587
  1 p
  0.34829881977     1.0000000000
  1 d
  1.4000000000      1.0000000000
*
*
ne def2-SVP
# ne     (7s4p1d) / [3s2p1d]      {511/31/1}
*
  5 s
  3598.9736625      -0.53259297003E-02
  541.32073112      -0.39817417969E-01
  122.90450062      -0.17914358188
  34.216617022      -0.46893582977
  10.650584124      -0.44782537577
  1 s
  1.3545953960      1.0000000000
  1 s

```

```

0.41919362639      1.0000000000
  3 p
28.424053785      -0.46031944795E-01
6.2822510953      -0.23993183041
1.6978715079      -0.50871724964
  1 p
0.43300700172      1.0000000000
  1 d
1.88800000000      1.0000000000
*
*
na def2-SVP
# na      (10s6p1d) / [4s2p1d]      {5311/51/1}
*
  5 s
4098.2003908      -0.58535911879E-02
616.49374031      -0.43647161872E-01
139.96644001      -0.19431465884
39.073441051      -0.48685065731
11.929847205      -0.41881705137
  3 s
20.659966030      0.85949689854E-01
1.9838860978      -0.56359144041
0.64836323942      -0.51954009048
  1 s
0.52443967404E-01  1.0000000000
  1 s
0.28048160742E-01  1.0000000000
  5 p
75.401862017      0.15435362532E-01
17.274818978      0.99738293184E-01
5.1842347425      0.31209593966
1.6601211973      0.49295674807
0.51232528958      0.32420398318
  1 p
0.52000000000E-01  1.0000000000
  1 d
0.13100000000      0.0000000000
*
*
mg def2-SVP
# mg      (10s7p1d) / [4s3p1d]      {5311/511/1}
*
  5 s
4953.8339196      -0.57778967498E-02
745.18044154      -0.43124761082E-01
169.21604972      -0.19268216987
47.300672019      -0.48641439116
14.461336973      -0.42550894077
  3 s
24.768174789      0.87956969984E-01
2.4940945349      -0.55165058128
0.87807584533      -0.53443294833
  1 s
0.87212782497E-01  1.0000000000
  1 s
0.33599293780E-01  1.0000000000
  5 p
98.053010494      -0.14480564601E-01
22.586932277      -0.95495750787E-01

```

```

6.8391509842      -0.30787672651
2.2332843818      -0.49936292886
0.71606599387     -0.31503476213
 1 p
0.18914796195     1.00000000000
 1 p
0.53768755187E-01 1.00000000000
 1 d
0.10100000000     1.00000000000
*
*
al def2-SVP
# al      (10s7p1d) / [4s3p1d]      {5311/511/1}
*
 5 s
5887.5727030      0.13483347987E-02
885.61225996      0.10071576809E-01
201.13604899      0.45132454056E-01
56.284974674      0.11461268043
17.229551243      0.10159608943
 3 s
29.340249922      0.69347454208E-01
3.0439630420     -0.42528117679
1.1285539518     -0.41449832210
 1 s
0.14234175160     1.00000000000
 1 s
0.54400192313E-01 1.00000000000
 5 p
145.11918809      0.63963373134E-02
33.717894833      0.44189359965E-01
10.369863083      0.15581575993
3.5135616036      0.28635286951
1.1980050273      0.22921423248
 1 p
0.26583005913     1.00000000000
 1 p
0.71003361994E-01 1.00000000000
 1 d
0.30000000000     1.00000000000
*
*
si def2-SVP
# si      (10s7p1d) / [4s3p1d]      {5311/511/1}
*
 5 s
6903.7118686      0.13373962995E-02
1038.4346419      0.99966546241E-02
235.87581480      0.44910165101E-01
66.069385169      0.11463638540
20.247945761      0.10280063858
 3 s
34.353481730      0.70837285010E-01
3.6370788192     -0.43028836252
1.4002048599     -0.41382774969
 1 s
0.20484414805     1.00000000000
 1 s
0.77994095468E-01 1.00000000000
 5 p

```

|                                       |                    |
|---------------------------------------|--------------------|
| 179.83907373                          | 0.61916656462E-02  |
| 41.907258846                          | 0.43399431982E-01  |
| 12.955294367                          | 0.15632019351      |
| 4.4383267393                          | 0.29419996982      |
| 1.5462247904                          | 0.23536823814      |
| 1 p                                   |                    |
| 0.35607612302                         | 1.0000000000       |
| 1 p                                   |                    |
| 0.10008513762                         | 1.0000000000       |
| 1 d                                   |                    |
| 0.35000000000                         | 1.0000000000       |
| *                                     |                    |
| *                                     |                    |
| p def2-SVP                            |                    |
| # p (10s7p1d) / [4s3p1d] {5311/511/1} |                    |
| *                                     |                    |
| 5 s                                   |                    |
| 8002.4795106                          | 0.57503489302E-02  |
| 1203.6813590                          | 0.43007628959E-01  |
| 273.44227031                          | 0.19363986252      |
| 76.655541517                          | 0.49651693399      |
| 23.516927435                          | 0.44983262479      |
| 3 s                                   |                    |
| 39.791683439                          | 0.95188129789E-01  |
| 4.2770343323                          | -0.57649840368     |
| 1.6940256888                          | -0.54239583865     |
| 1 s                                   |                    |
| 0.27567674644                         | 1.0000000000       |
| 1 s                                   |                    |
| 0.10495590099                         | 1.0000000000       |
| 5 p                                   |                    |
| 219.50755823                          | 0.92100565257E-02  |
| 51.274155030                          | 0.65409765745E-01  |
| 15.921595892                          | 0.24033730279      |
| 5.5069913481                          | 0.46318321788      |
| 1.9537719426                          | 0.37392563382      |
| 1 p                                   |                    |
| 0.47803397932                         | 1.0000000000       |
| 1 p                                   |                    |
| 0.13657952621                         | 1.0000000000       |
| 1 d                                   |                    |
| 0.45000000000                         | 1.0000000000       |
| *                                     |                    |
| *                                     |                    |
| s def2-SVP                            |                    |
| # s (10s7p1d) / [4s3p1d] {5311/511/1} |                    |
| *                                     |                    |
| 5 s                                   |                    |
| 9184.9303010                          | -0.22294387756E-02 |
| 1381.5105503                          | -0.16683029937E-01 |
| 313.87147580                          | -0.75262436116E-01 |
| 88.053870623                          | -0.19376827038     |
| 27.039914905                          | -0.17718020803     |
| 3 s                                   |                    |
| 45.648731303                          | -0.10736062573     |
| 4.9664522326                          | 0.65066293018      |
| 2.0116242047                          | 0.59712155354      |
| 1 s                                   |                    |
| 0.35661077013                         | 1.0000000000       |
| 1 s                                   |                    |

```

0.13507221477      1.0000000000
  5 p
261.98233439      -0.92729929822E-02
61.306894736      -0.66547669241E-01
19.103729887      -0.24828595903
6.6567720378      -0.48703847402
2.3959635161      -0.39337850312
  1 p
0.61776161679      1.0000000000
  1 p
0.16993376871      1.0000000000
  1 d
0.55000000000      1.0000000000
*
*
cl def2-SVP
# cl      (10s7p1d) / [4s3p1d]      {5311/511/1}
*
  5 s
10449.827566      0.19708362484E-02
1571.7365221      0.14754727977E-01
357.12065523      0.66679112875E-01
100.25185935      0.17228924084
30.812727554      0.15883786100
  3 s
51.923789434      -0.10009298909
5.7045760975      0.60841752753
2.3508376809      0.54352153355
  1 s
0.44605124672      1.0000000000
  1 s
0.16848856190      1.0000000000
  5 p
307.66790569      -0.87801484118E-02
72.102015515      -0.63563355471E-01
22.532680262      -0.24016428276
7.8991765444      -0.47798866557
2.8767268321      -0.38515850005
  1 p
0.77459363955      1.0000000000
  1 p
0.21037699698      1.0000000000
  1 d
0.65000000000      1.0000000000
*
*
ar def2-SVP
# ar      (10s7p1d) / [4s3p1d]      {5311/511/1}
*
  5 s
11797.119765      0.20214479973E-02
1774.3522753      0.15139852688E-01
403.18875733      0.68525400873E-01
113.24933999      0.17762929207
34.835298193      0.16496495001
  3 s
58.614775042      -0.10343394000
6.4922045078      0.63133365899
2.7117014403      0.54887572301
  1 s

```



```

0.54412974538      1.0000000000
  1 s
0.20517411136      1.0000000000
  5 p
356.28707256      -0.87321783271E-02
83.593132866      -0.63680317444E-01
26.186704029      -0.24311906886
9.2257275925      -0.48956069653
3.3922754954      -0.39229190040
  1 p
0.94740534010      1.0000000000
  1 p
0.25659135062      1.0000000000
  1 d
0.69600000000      1.0000000000
*
*
k def2-SVP
# k      (14s9p2d) / [5s3p2d]      {63311/531/11}
*
  6 s
31478.746764      0.39838653994E-02
4726.8876066      0.30501759762E-01
1075.4345353      0.15073752622
303.39811023      0.51912939801
98.327112831      1.0366957005
33.636222177      0.76398963199
  3 s
65.639209962      -0.28242617106
7.3162592218      1.6914935860
2.8902580135      1.2965331953
  3 s
4.5459748965      -0.76343555273E-02
0.70404124062      0.25635718960E-01
0.28266888959      0.16606859208E-01
  1 s
0.29058164020E-01  1.0000000000
  1 s
0.12111638157E-01  1.0000000000
  5 p
361.22492154      0.20906479823E-01
84.670222166      0.15043641740
26.469088236      0.55440061077
9.2658077615      1.0409009991
3.3423388293      0.67825341194
  3 p
1.5100876104      0.75248191146
0.56568375163      1.3708585031
0.20817008495      0.66047633079
  1 p
0.41737000000E-01  1.0000000000
  1 d
0.35300000000      1.0000000000
  1 d
0.98000000000E-01  1.0000000000
*
*
ca def2-SVP
# ca      (14s9p4d) / [5s3p2d]      {63311/531/31}
*

```

```

6 s
35138.713929      0.39482520740E-02
5276.4111348     0.30234243552E-01
1200.4692589     0.14952019681
338.71810542    0.51597345713
109.85385922    1.0339510296
37.608880299    0.76937933526
3 s
73.107977555    -0.28268525011
8.2407705688    1.6796092142
3.2959812993    1.2803766016
3 s
5.2341800914    -0.76868604561E-02
0.84187220515    0.25382375978E-01
0.36510294029    0.16512171511E-01
1 s
0.51222402884E-01  1.0000000000
1 s
0.19825111408E-01  1.0000000000
5 p
413.11313893    0.20327135354E-01
96.935786224    0.14730276362
30.372154659    0.54887167322
10.684776830    1.0440659818
3.8821258350    0.68653490684
3 p
1.7993016295    0.75410246871
0.69189056530    1.3409296599
0.26364024096    0.56391989435
1 p
0.74979000000E-01  1.0000000000
3 d
5.4979093879    0.73770011433E-01
1.3177128032    0.26052853169
0.32188682649    0.45233836380
1 d
0.70528614919E-01  1.0000000000
*
*
sc def2-SVP
# sc      (14s9p5d1f) / [5s3p2d1f]      {63311/531/41/1}
*
6 s
38956.081804    0.39293205858E-02
5849.5733637    0.30093221229E-01
1330.8813154    0.14890370950
375.55534165    0.51464282906
121.87261370    1.0337708070
41.760243729    0.77436851627
3 s
81.060633953    -0.28318552316
9.2059823972    1.6770806984
3.7063215732    1.2594733678
3 s
5.9888909988    -0.77821367493E-02
0.97363432378    0.25499692745E-01
0.42041019223    0.16191560820E-01
1 s
0.59440551913E-01  1.0000000000
1 s

```

```

0.22897806303E-01  1.0000000000
  5 p
466.31481262      0.19984300385E-01
109.51217097      0.14561043072
34.375921827      0.54687466223
12.142096955      1.0479006012
4.4336767669      0.68894890327
  3 p
2.0971291866      0.75619214724
0.80977606956      1.3178212235
0.30834046588      0.54312268173
  1 p
0.89748000000E-01  1.0000000000
  4 d
19.240334928      0.27039082144E-01
5.1178995899      0.13803684743
1.6554278827      0.34869086403
0.54016355610      0.48594185717
  1 d
0.16211214518      0.34374449689
  1 f
0.34500000000      1.0000000000
*
*
ti def2-SVP
# ti      (14s9p5d1f) / [5s3p2d1f]      {63311/531/41/1}
*
  6 s
42961.512185      0.39127635355E-02
6450.9759169      0.29969820489E-01
1467.7210915      0.14836352707
414.20997355      0.51347285324
134.48715840      1.0335365483
46.122209796      0.77854233930
  3 s
89.447762543      -0.28385401259
10.223346060      1.6772785333
4.1353774271      1.2411928456
  3 s
6.7896181452      -0.78399994518E-02
1.1106730691      0.25495493019E-01
0.47565975578      0.16061172892E-01
  1 s
0.65986956934E-01  1.0000000000
  1 s
0.25210342250E-01  1.0000000000
  5 p
522.03684782      0.19754179642E-01
122.68649489      0.14460677619
38.572903611      0.54669004165
13.672169319      1.0531647540
5.0118529359      0.69111213363
  3 p
2.4131928282      0.75803437136
0.93252270050      1.3036241399
0.35429058390      0.53638653300
  1 p
0.10156100000      1.0000000000
  4 d
23.465125957      0.26536380115E-01

```

```

6.3332593832      0.13796453963
2.0766489946      0.35312644228
0.69027361954     0.48647124166
  1 d
0.21088738554     0.33026314258
  1 f
0.56200000000     1.00000000000
*
*
v def2-SVP
# v      (14s9p5d1f) / [5s3p2d1f]      {63311/531/41/1}
*
  6 s
47160.376060      0.14498688908E-02
7081.4110871      0.11106435251E-01
1611.1621223      0.55005423585E-01
454.72940551      0.19060252591
147.71321208      0.38435022957
50.699538950      0.29095546792
  3 s
98.262492669      -0.10942337856
11.294293099      0.64539490399
4.5853360105      0.47117880777
  3 s
7.6359689588      -0.22454949054
1.2539836689      0.72594852764
0.53271935387     0.45560582748
  1 s
0.72246239566E-01  1.00000000000
  1 s
0.27358087448E-01  1.00000000000
  5 p
580.55044988      0.97315110917E-02
136.52341127      0.71531241137E-01
42.983958820      0.27197688414
15.282798763      0.52618988893
5.6202495154      0.34452533498
  3 p
2.7485386415      0.34040396496
1.0618550073      0.57983996120
0.40235518645     0.23911643083
  1 p
0.11124800000     1.00000000000
  4 d
27.358434017      0.26641927050E-01
7.4540604253      0.13995311726
2.4633917847      0.35751066639
0.82480925277     0.48488354148
  1 d
0.25257904742     0.32332844995
  1 f
0.83100000000     1.00000000000
*
*
cr def2-SVP
# cr      (14s9p5d1f) / [5s3p2d1f]      {63311/531/41/1}
*
  6 s
51528.086349      0.14405823106E-02
7737.2103487      0.11036202287E-01

```

|                                                |                   |
|------------------------------------------------|-------------------|
| 1760.3748470                                   | 0.54676651806E-01 |
| 496.87706544                                   | 0.18965038103     |
| 161.46520598                                   | 0.38295412850     |
| 55.466352268                                   | 0.29090050668     |
| 3 s                                            |                   |
| 107.54732999                                   | -0.10932281100    |
| 12.408671897                                   | 0.64472599471     |
| 5.0423628826                                   | 0.46262712560     |
| 3 s                                            |                   |
| 8.5461640165                                   | -0.22711013286    |
| 1.3900441221                                   | 0.73301527591     |
| 0.56066602876                                  | 0.44225565433     |
| 1 s                                            |                   |
| 0.71483705972E-01                              | 1.0000000000      |
| 1 s                                            |                   |
| 0.28250687604E-01                              | 1.0000000000      |
| 5 p                                            |                   |
| 640.48536096                                   | 0.96126715203E-02 |
| 150.69711194                                   | 0.70889834655E-01 |
| 47.503755296                                   | 0.27065258990     |
| 16.934120165                                   | 0.52437343414     |
| 6.2409680590                                   | 0.34107994714     |
| 3 p                                            |                   |
| 3.0885463206                                   | 0.33973986903     |
| 1.1791047769                                   | 0.57272062927     |
| 0.43369774432                                  | 0.24582728206     |
| 1 p                                            |                   |
| 0.12067500000                                  | 1.0000000000      |
| 4 d                                            |                   |
| 27.559479426                                   | 0.30612488044E-01 |
| 7.4687020327                                   | 0.15593270944     |
| 2.4345903574                                   | 0.36984421276     |
| 0.78244754808                                  | 0.47071118077     |
| 1 d                                            |                   |
| 0.21995774311                                  | 0.33941649889     |
| 1 f                                            |                   |
| 1.1470000000                                   | 1.0000000000      |
| *                                              |                   |
| *                                              |                   |
| mn def2-SVP                                    |                   |
| # mn (14s9p5d1f) / [5s3p2d1f] {63311/531/41/1} |                   |
| *                                              |                   |
| 6 s                                            |                   |
| 56137.009037                                   | 0.14321304702E-02 |
| 8429.2063943                                   | 0.10972509162E-01 |
| 1917.8277233                                   | 0.54382468712E-01 |
| 541.36230198                                   | 0.18884335129     |
| 176.00069142                                   | 0.38198025054     |
| 60.500477010                                   | 0.29156772596     |
| 3 s                                            |                   |
| 117.17282882                                   | -0.10933661328    |
| 13.596973368                                   | 0.64305039431     |
| 5.5483996341                                   | 0.45848970584     |
| 3 s                                            |                   |
| 9.4662853530                                   | -0.22538977259    |
| 1.5595006070                                   | 0.72307758657     |
| 0.65230205868                                  | 0.45300721536     |
| 1 s                                            |                   |
| 0.84003734475E-01                              | 1.0000000000      |
| 1 s                                            |                   |

```

0.31256098581E-01  1.0000000000
  5 p
706.00497535      0.95055518167E-02
166.19728820      0.70356271142E-01
52.452061906      0.27005556982
18.746932862      0.52574344602
6.9282991622      0.34254033223
  3 p
3.4772204938      0.33994073736
1.3406906449      0.57203836254
0.50498803038     0.23847605831
  1 p
0.12765000000     1.0000000000
  4 d
35.423264935      0.26985304111E-01
9.7814221451      0.14383458648
3.2673488767      0.36418958377
1.1026472189      0.48152670661
  1 d
0.33743205934     0.31458754360
  1 f
1.3260000000      1.0000000000
*
*
fe def2-SVP
# fe      (14s9p5d1f) / [5s3p2d1f]      {63311/531/41/1}
*
  6 s
60923.640643      0.14302254466E-02
9147.8893982      0.10958790038E-01
2081.3505927      0.54332554248E-01
587.55977067      0.18884995009
191.09043990      0.38253069946
65.732730112      0.29308335984
  3 s
127.25891928      -0.10964564925
14.830913010      0.64387631332
6.0653307408      0.45472347323
  3 s
10.449943710      -0.22539639952
1.7245228003      0.72164398156
0.71772177325     0.44985492922
  1 s
0.91449828308E-01  1.0000000000
  1 s
0.33706691021E-01  1.0000000000
  5 p
773.43750995      0.94325735144E-02
182.15149714      0.70029620575E-01
57.547272758      0.26993651996
20.614988935      0.52700011047
7.6348557890      0.34284148028
  3 p
3.8719327990      0.33974402988
1.4924724132      0.56842594005
0.56061284958     0.23649365839
  1 p
0.13491500000     1.0000000000
  4 d
38.968133419      0.27879664382E-01

```

```

10.800067078      0.14858319982
3.6136457999     0.36905479496
1.2129967888     0.47745100883
1 d
0.36524393170    0.31418142304
1 f
1.5980000000     1.0000000000
*
*
co def2-SVP
# co      (14s9p5d1f) / [5s3p2d1f]      {63311/531/41/1}
*
6 s
65902.208257     0.14284614936E-02
9895.3896027     0.10946072783E-01
2251.4305789     0.54285953890E-01
635.61097084     0.18885179079
206.78820681     0.38301634994
71.179242971     0.29443551266
3 s
137.77268040     -0.10990221736
16.118079243     0.64455537395
6.6030327710     0.45116787924
3 s
11.479915788     -0.22593846910
1.8956426324     0.72231409008
0.78466232067    0.44903812296
1 s
0.98425774432E-01  1.0000000000
1 s
0.35945741932E-01  1.0000000000
5 p
843.64358575     0.93866097254E-02
198.76386994     0.69880208716E-01
62.854963098     0.27037070345
22.562842280     0.52904786880
8.3713209127     0.34357029579
3 p
4.2858719800     0.34027999036
1.6508041817     0.56693392384
0.61834231096    0.23617979783
1 p
0.14130800000    1.0000000000
4 d
42.927867612     0.28487788365E-01
11.942533053     0.15206951283
4.0046495664     0.37310913999
1.3413193804     0.47549837676
1 d
0.40015009743    0.31346831424
1 f
1.9030000000     1.0000000000
*
*
ni def2-SVP
# ni      (14s9p5d1f) / [5s3p2d1f]      {63311/531/41/1}
*
6 s
71074.803211     0.14260386729E-02
10672.020941     0.10928236994E-01

```

|                                                |                   |
|------------------------------------------------|-------------------|
| 2428.1389007                                   | 0.54212626938E-01 |
| 685.53595148                                   | 0.18874768902     |
| 223.10072863                                   | 0.38324616985     |
| 76.842014042                                   | 0.29550637144     |
| 3 s                                            |                   |
| 148.71122016                                   | -0.11014443059    |
| 17.459154987                                   | 0.64521426988     |
| 7.1625280665                                   | 0.44797838103     |
| 3 s                                            |                   |
| 12.556137125                                   | -0.22645403224    |
| 2.0735740488                                   | 0.72320959286     |
| 0.85382640602                                  | 0.44868026476     |
| 1 s                                            |                   |
| 0.10536766271                                  | 1.0000000000      |
| 1 s                                            |                   |
| 0.38134087688E-01                              | 1.0000000000      |
| 5 p                                            |                   |
| 916.73608662                                   | 0.93439635610E-02 |
| 216.06139913                                   | 0.69737374902E-01 |
| 68.383914817                                   | 0.27073495012     |
| 24.593843952                                   | 0.53078301549     |
| 9.1392960204                                   | 0.34410229438     |
| 3 p                                            |                   |
| 4.7193371746                                   | 0.34076082016     |
| 1.8161849234                                   | 0.56580169611     |
| 0.67840750720                                  | 0.23616717361     |
| 1 p                                            |                   |
| 0.14658800000                                  | 1.0000000000      |
| 4 d                                            |                   |
| 47.093832108                                   | 0.28982316948E-01 |
| 13.146463975                                   | 0.15494995950     |
| 4.4170548925                                   | 0.37633115111     |
| 1.4771565078                                   | 0.47365096014     |
| 1 d                                            |                   |
| 0.43735921792                                  | 0.31247837833     |
| 1 f                                            |                   |
| 2.1740000000                                   | 1.0000000000      |
| *                                              |                   |
| *                                              |                   |
| cu def2-SVP                                    |                   |
| # cu (14s9p5d1f) / [5s3p2d1f] {63311/531/41/1} |                   |
| *                                              |                   |
| 6 s                                            |                   |
| 76381.348056                                   | 0.14336079896E-02 |
| 11468.777499                                   | 0.10986749865E-01 |
| 2609.4246495                                   | 0.54513652465E-01 |
| 736.75033098                                   | 0.18990128258     |
| 239.82419958                                   | 0.38581959211     |
| 82.656829252                                   | 0.29790607498     |
| 3 s                                            |                   |
| 160.13544196                                   | -0.11146778567    |
| 18.834177695                                   | 0.65349301031     |
| 7.7176595741                                   | 0.44770534421     |
| 3 s                                            |                   |
| 13.710846717                                   | -0.22870911122    |
| 2.2349895670                                   | 0.73464423031     |
| 0.87818360069                                  | 0.43273070874     |
| 1 s                                            |                   |
| 0.87187458064E-01                              | 1.0000000000      |
| 1 s                                            |                   |



```

0.32969114665E-01  1.0000000000
  5 p
991.24075782      0.93878498798E-02
233.69376116      0.70208282458E-01
74.020930927      0.27323522220
26.664967447      0.53580792728
9.9192087478      0.34575794906
  3 p
5.1519553926      0.34229108083
1.9638205828      0.56456592484
0.71560097037      0.24078584318
  1 p
0.15506500000      1.00000000000
  4 d
47.335049590      0.32375547758E-01
13.161666077      0.16810218684
4.3693777244      0.38477707982
1.4132925109      0.46147880178
  1 d
0.38878001452      0.32388873258
  1 f
2.23300000000      1.00000000000
*
*
zn def2-SVP
# zn      (14s9p5d1f) / [5s3p2d1f]      {63311/531/41/1}
*
  6 s
82000.711629      0.14210764000E-02
12312.471777      0.10891499487E-01
2801.3944193      0.54057188059E-01
790.99424302      0.18847463904
257.56551079      0.38346549346
88.814933400      0.29723794197
  3 s
171.86353716      -0.11051849523
20.302534785      0.64607716984
8.3464123068      0.44220117322
  3 s
14.847536940      -0.22705309278
2.4495029507      0.72433217935
0.99845821824      0.44836495592
  1 s
0.11891307937      1.00000000000
  1 s
0.42297428760E-01  1.00000000000
  5 p
1071.5185372      0.92767797235E-02
252.69712152      0.69541149434E-01
80.100829126      0.27156772564
28.903393172      0.53401355573
10.768899879      0.34501323446
  3 p
5.6446212530      0.34129600164
2.1678291347      0.56390521973
0.80540898341      0.23676109735
  1 p
0.16245500000      1.00000000000
  4 d
56.088939191      0.29588869140E-01

```

```

15.751908917      0.15872571404
5.3115812367      0.37976229159
1.7737904917      0.46898959172
 1 d
0.51975583665     0.30907149078
 1 f
2.6140000000      1.0000000000
*
*
ga def2-SVP
# ga      (14s10p6d) / [5s4p3d]      {63311/5311/411}
*
 6 s
87842.126296      0.14271588798E-02
13189.496402      0.10938894097E-01
3000.9482141      0.54308200127E-01
847.38425966      0.18951055983
276.00980642      0.38615185918
95.216672071      0.30051082719
 3 s
184.00703968      -0.11124461963
21.827051433      0.64831322918
9.0026963761      0.44358383594
 3 s
16.033176938      -0.23014299555
2.6707724878      0.72946861516
1.1252834170      0.46214976951
 1 s
0.15967608829     1.0000000000
 1 s
0.57643044753E-01 1.0000000000
 5 p
1167.2665844      0.90974021307E-02
275.38062789      0.68456273343E-01
87.375073070      0.26922293888
31.597254670      0.53507897882
11.824122798      0.35279062760
 3 p
6.2881845133      0.33938244530
2.5199853240      0.56871947608
1.0169726306      0.27717694939
 1 p
0.24748373604     1.0000000000
 1 p
0.66685294163E-01 1.0000000000
 4 d
65.354237674      0.27370146382E-01
18.504656747      0.15099463976
6.3179620632      0.37485328545
2.1641389426      0.47510606851
 1 d
0.66693092754     0.29843287401
 1 d
0.20700000000     1.0000000000
*
*
ge def2-SVP
# ge      (14s10p6d) / [5s4p3d]      {63311/5311/411}
*
 6 s

```

|                                             |                   |
|---------------------------------------------|-------------------|
| 93889.836642                                | 0.14233976060E-02 |
| 14097.497528                                | 0.10910795654E-01 |
| 3207.5477309                                | 0.54183705943E-01 |
| 905.76727269                                | 0.18922820349     |
| 295.11014693                                | 0.38612847001     |
| 101.84713141                                | 0.30164050736     |
| 3 s                                         |                   |
| 196.56719662                                | -0.11118770940    |
| 23.405292522                                | 0.64616007369     |
| 9.6839116702                                | 0.44188904568     |
| 3 s                                         |                   |
| 17.269736544                                | -0.23027421375    |
| 2.8964622160                                | 0.73017169398     |
| 1.2553621412                                | 0.46197222255     |
| 1 s                                         |                   |
| 0.20213081492                               | 1.0000000000      |
| 1 s                                         |                   |
| 0.73867910982E-01                           | 1.0000000000      |
| 5 p                                         |                   |
| 1259.2085995                                | 0.90115464252E-02 |
| 297.15626382                                | 0.67986841689E-01 |
| 94.353387522                                | 0.26853856488     |
| 34.176329677                                | 0.53659649219     |
| 12.816139615                                | 0.35633514961     |
| 3 p                                         |                   |
| 6.8471029784                                | 0.33900693119     |
| 2.7717363939                                | 0.56809365264     |
| 1.1458418175                                | 0.27246539884     |
| 1 p                                         |                   |
| 0.30679631536                               | 1.0000000000      |
| 1 p                                         |                   |
| 0.89283644115E-01                           | 1.0000000000      |
| 4 d                                         |                   |
| 74.782168177                                | 0.25755860205E-01 |
| 21.310849759                                | 0.14536816132     |
| 7.3464792363                                | 0.37134209859     |
| 2.5656271395                                | 0.48002998436     |
| 1 d                                         |                   |
| 0.81981773070                               | 0.28978790744     |
| 1 d                                         |                   |
| 0.24600000000                               | 1.0000000000      |
| *                                           |                   |
| *                                           |                   |
| as def2-SVP                                 |                   |
| # as (14s10p6d) / [5s4p3d] {63311/5311/411} |                   |
| *                                           |                   |
| 6 s                                         |                   |
| 100146.52554                                | 0.14258349617E-02 |
| 15036.861711                                | 0.10930176963E-01 |
| 3421.2902833                                | 0.54294174610E-01 |
| 966.16965717                                | 0.18976078153     |
| 314.87394026                                | 0.38775195453     |
| 108.70823790                                | 0.30402812040     |
| 3 s                                         |                   |
| 209.54238950                                | -0.11162094204    |
| 25.038221139                                | 0.64697607762     |
| 10.390964343                                | 0.44223608673     |
| 3 s                                         |                   |
| 18.555090093                                | -0.22994190569    |
| 3.1281217449                                | 0.73319107613     |

|                                             |                   |
|---------------------------------------------|-------------------|
| 1.3884885073                                | 0.45533653943     |
| 1 s                                         |                   |
| 0.24714362141                               | 1.0000000000      |
| 1 s                                         |                   |
| 0.91429428670E-01                           | 1.0000000000      |
| 5 p                                         |                   |
| 1355.6443507                                | 0.89182507898E-02 |
| 319.99929270                                | 0.67454750717E-01 |
| 101.67734092                                | 0.26759772110     |
| 36.886323845                                | 0.53776844520     |
| 13.861115909                                | 0.35992570244     |
| 3 p                                         |                   |
| 7.4260666912                                | 0.34036849637     |
| 3.0316247187                                | 0.57030149334     |
| 1.2783078340                                | 0.26606170238     |
| 1 p                                         |                   |
| 0.37568503356                               | 1.0000000000      |
| 1 p                                         |                   |
| 0.11394805454                               | 1.0000000000      |
| 4 d                                         |                   |
| 84.445514539                                | 0.24518402724E-01 |
| 24.190416102                                | 0.14107454677     |
| 8.4045015119                                | 0.36875228915     |
| 2.9808970748                                | 0.48409561362     |
| 1 d                                         |                   |
| 0.97909243359                               | 0.28250268781     |
| 1 d                                         |                   |
| 0.29300000000                               | 1.0000000000      |
| *                                           |                   |
| *                                           |                   |
| se def2-SVP                                 |                   |
| # se (14s10p6d) / [5s4p3d] {63311/5311/411} |                   |
| *                                           |                   |
| 6 s                                         |                   |
| 106612.20027                                | 0.14274889113E-02 |
| 16007.604701                                | 0.10943525114E-01 |
| 3642.1699707                                | 0.54374171596E-01 |
| 1028.5912993                                | 0.19018092947     |
| 335.30298888                                | 0.38913021696     |
| 115.80129154                                | 0.30620207088     |
| 3 s                                         |                   |
| 222.93325020                                | -0.11198808009    |
| 26.726257934                                | 0.64752124207     |
| 11.124501923                                | 0.44241976651     |
| 3 s                                         |                   |
| 19.888520061                                | -0.22857227762    |
| 3.3668473803                                | 0.73591359951     |
| 1.5249277839                                | 0.44330199577     |
| 1 s                                         |                   |
| 0.29630037912                               | 1.0000000000      |
| 1 s                                         |                   |
| 0.11009288974                               | 1.0000000000      |
| 5 p                                         |                   |
| 1455.9068120                                | 0.88203597043E-02 |
| 343.75101831                                | 0.66875851967E-01 |
| 109.29554964                                | 0.26640578080     |
| 39.707711022                                | 0.53834928422     |
| 14.950185232                                | 0.36303281993     |
| 3 p                                         |                   |
| 8.0208962094                                | 0.34153807025     |

|                                             |                   |
|---------------------------------------------|-------------------|
| 3.2934649756                                | 0.57257906583     |
| 1.4058602438                                | 0.25549813222     |
| 1 p                                         |                   |
| 0.45076123226                               | 1.0000000000      |
| 1 p                                         |                   |
| 0.13353413325                               | 1.0000000000      |
| 4 d                                         |                   |
| 94.494024044                                | 0.23490101098E-01 |
| 27.188185260                                | 0.13747735767     |
| 9.5091567352                                | 0.36649929124     |
| 3.4170516853                                | 0.48750989884     |
| 1 d                                         |                   |
| 1.1479590083                                | 0.27657943383     |
| 1 d                                         |                   |
| 0.33800000000                               | 1.0000000000      |
| *                                           |                   |
| *                                           |                   |
| br def2-SVP                                 |                   |
| # br (14s10p6d) / [5s4p3d] {63311/5311/411} |                   |
| *                                           |                   |
| 6 s                                         |                   |
| 113286.38776                                | 0.14283037779E-02 |
| 17009.626303                                | 0.10950417496E-01 |
| 3870.1842567                                | 0.54421006604E-01 |
| 1093.0357227                                | 0.19047907695     |
| 356.39721797                                | 0.39024642737     |
| 123.12539643                                | 0.30814432514     |
| 3 s                                         |                   |
| 236.74084007                                | -0.11228065671    |
| 28.468661070                                | 0.64775962312     |
| 11.883443722                                | 0.44235575986     |
| 3 s                                         |                   |
| 21.269633312                                | -0.22642576323    |
| 3.6129226841                                | 0.73823712008     |
| 1.6626648969                                | 0.42683868694     |
| 1 s                                         |                   |
| 0.34823793232                               | 1.0000000000      |
| 1 s                                         |                   |
| 0.13019031394                               | 1.0000000000      |
| 5 p                                         |                   |
| 1560.2801881                                | 0.87166669072E-02 |
| 368.47859205                                | 0.66243637420E-01 |
| 117.22978849                                | 0.26495610385     |
| 42.648909248                                | 0.53839160587     |
| 16.087225096                                | 0.36579387888     |
| 3 p                                         |                   |
| 8.6352810058                                | 0.34248787366     |
| 3.5613665502                                | 0.57500678213     |
| 1.5292626609                                | 0.24330394172     |
| 1 p                                         |                   |
| 0.53064294848                               | 1.0000000000      |
| 1 p                                         |                   |
| 0.15702758965                               | 1.0000000000      |
| 4 d                                         |                   |
| 104.85518642                                | 0.22650147581E-01 |
| 30.281143688                                | 0.13455483230     |
| 10.651394267                                | 0.36474454537     |
| 3.8699456233                                | 0.49044587056     |
| 1 d                                         |                   |
| 1.3240876762                                | 0.27137289040     |

```

1 d
0.389000000000      1.000000000000
*
*
kr def2-SVP
# kr      (14s10p6d) / [5s4p3d]      {63311/5311/411}
*
6 s
120165.64875      0.14294234496E-02
18042.500169      0.10959597020E-01
4105.1800388      0.54479647470E-01
1159.4447248      0.19081239122
378.13810346      0.391404445949
130.67610045      0.31007346689
3 s
250.96373353      -0.11258604011
30.265930380      0.64816322524
12.668110757      0.44240238994
3 s
22.697940101      -0.22391964908
3.8673017398      0.74060953026
1.8013706671      0.40803658445
1 s
0.40308639136      1.000000000000
1 s
0.15170527749      1.000000000000
5 p
1668.5736623      0.86215009803E-02
394.13862798      0.65665506884E-01
125.46644854      0.26366576697
45.704992729      0.53867658574
17.270133229      0.36865167502
3 p
9.2699487770      0.34346189015
3.8364617719      0.57784776196
1.6467163312      0.23075615197
1 p
0.61479686489      1.000000000000
1 p
0.18319467414      1.000000000000
4 d
115.55868603      0.21945485333E-01
33.477985864      0.13211212879
11.834450207      0.36333306964
4.3408254894      0.49300484446
1 d
1.5079273157      0.26676858913
1 d
0.443000000000      1.000000000000
*
*
rb def2-SVP
# rb      (7s6p2d) / [5s3p2d]      {31111/411/11}
*
3 s
4.6687885071      0.29008526793
2.9442428420      -0.67740090428
0.58171262989      0.45712389487
1 s
0.45147933555      1.000000000000

```

```

1 s
0.21604923532      1.0000000000
1 s
0.32088816526E-01  1.0000000000
1 s
0.13833878175E-01  1.0000000000
4 p
5.5234179480      0.51234729472E-01
3.4120149646      -0.17337025646
0.76899021792     0.43339683188
0.33088071786     0.55354332721
1 p
0.13423268441     1.0000000000
1 p
0.20642679613E-01  1.0000000000
1 d
0.22600000000     1.0000000000
1 d
0.27432280711E-01  1.0000000000
*
rb def2-ecp
*
ncore =      28      lmax =      3
# coefficient  r^n      exponent
f
-12.3169000    2      3.8431140
s-f
89.5001980    2      5.0365510
0.4937610     2      1.9708490
12.3169000    2      3.8431140
p-f
58.5689740    2      4.2583410
0.4317910     2      1.4707090
12.3169000    2      3.8431140
d-f
26.2248980    2      3.0231270
0.9628390     2      0.6503830
12.3169000    2      3.8431140
*
*
sr def2-SVP
# sr (6s6p5d) / [4s3p2d] {3111/411/41}
*
3 s
5.9276428767     0.19698765364
3.0691274814     -0.64852205985
0.70675488028    0.62064729022
1 s
0.33824024280    1.0000000000
1 s
0.61768869200E-01  1.0000000000
1 s
0.25767593093E-01  1.0000000000
4 p
2.4324720000     -0.37145059848
1.6642340000     0.37856824234
0.59455471858    0.59874487803
0.26152621998    0.35314019512
1 p
0.10258814042    1.0000000000

```

```

1 p
0.33223404030E-01 1.0000000000
4 d
3.6180810000 -0.75010000000E-02
0.99665600000 0.10809800000
0.39073500000 0.27854000000
0.12277000000 0.47731800000
1 d
0.36655000000E-01 0.44818300000
*
sr def2-ecp
*
ncore = 28 lmax = 3
# coefficient r^n exponent
f -15.8059920 2 4.6339750
s-f 135.4794300 2 7.4000740
17.5344630 2 3.6063790
15.8059920 2 4.6339750
p-f 88.3597090 2 6.4848680
15.3943720 2 3.2880530
15.8059920 2 4.6339750
d-f 29.8889870 2 4.6228410
6.6594140 2 2.2469040
15.8059920 2 4.6339750
*
*
y def2-SVP
# y (7s6p5d1f) / [5s3p2d1f] {31111/411/41/1}
*
3 s
5.1329580000 -1.3864845457
4.2401920000 1.9459581166
1.2982800000 0.44182603154
1 s
0.82904954347 1.0000000000
1 s
0.34752758911 1.0000000000
1 s
0.68418878574E-01 1.0000000000
1 s
0.27323992904E-01 1.0000000000
4 p
2.7279200000 -0.37249884912
1.9790500000 0.32572065996
0.79980886805 0.50094655502
0.38409397354 0.44385929493
1 p
0.16173582264 1.0000000000
1 p
0.30000000000E-01 1.0000000000
4 d
3.9030833060 -0.98209792625E-02
1.1363234302 0.19183629664
0.45617043877 0.40597788539
0.17470950748 0.43861485518
1 d

```



```

0.61978796638E-01  1.0000000000
 1 f
0.26515000000  1.0000000000
*
y def2-ecp
*
  ncore = 28          lmax = 3
# coefficient  r^n      exponent
f
  -19.1221981  2          6.5842120
  -2.4363754  2          3.2921060
s-f
  135.1538441  2          7.4880494
  15.5524413  2          3.7440247
  19.1221981  2          6.5842120
  2.4363754  2          3.2921060
p-f
  87.7849917  2          6.4453772
  11.5640660  2          3.2226886
  19.1221981  2          6.5842120
  2.4363754  2          3.2921060
d-f
  29.7010007  2          4.6584472
  5.5399685  2          2.3292236
  19.1221981  2          6.5842120
  2.4363754  2          3.2921060
*
*
zr def2-SVP
# zr (7s6p5d1f) / [5s3p2d1f] {31111/411/41/1}
*
  3 s
  5.8737890000  0.54255558714
  4.2872700000  -0.95241333244
  1.4641370000  -0.13703926411
  1 s
  0.83727682345  0.88521584390
  1 s
  0.36849806511  1.00000000000
  1 s
  0.77806859124E-01  1.00000000000
  1 s
  0.30273088330E-01  1.00000000000
  4 p
  2.8742240000  -0.46624086918
  2.1199010000  0.45883133891
  0.78845821105  0.58853912475
  0.36332579847  0.35822232244
  1 p
  0.14951762021  1.00000000000
  1 p
  0.30000000000E-01  1.00000000000
  4 d
  4.2898623878  -0.12212868080E-01
  1.3615557498  0.19692423520
  0.56937550689  0.42057831659
  0.22674948677  0.42757027999
  1 d
  0.83011031631E-01  1.00000000000
  1 f

```

```

0.39261000000      1.0000000000
*
zr def2-ecp
*
ncore =      28      lmax =      3
# coefficient  r^n      exponent
f      -21.0937760    2      7.5400000
      -3.0806943    2      3.7700000
s-f      150.2675911    2      8.2000000
      18.9762165    2      4.0897278
      21.0937760    2      7.5400000
      3.0806943    2      3.7700000
p-f      99.6221237    2      7.1100000
      14.1687333    2      3.5967980
      21.0937760    2      7.5400000
      3.0806943    2      3.7700000
d-f      35.0451235    2      5.3500000
      6.1112595    2      2.4918215
      21.0937760    2      7.5400000
      3.0806943    2      3.7700000
*
*
nb def2-SVP
# nb      (7s6p5d1f) / [5s3p2d1f]      {31111/411/41/1}
*
3 s
6.5663010000      -0.94917907866
4.5864380000      1.5736372883
3.7537700000      0.36380422981
1 s
0.84187717437      1.0000000000
1 s
0.38160666177      1.0000000000
1 s
0.85819911368E-01  1.0000000000
1 s
0.32702330370E-01  1.0000000000
4 p
3.0700630000      -0.51025115881
2.2379640000      0.53570598017
0.80801969671      0.63102216351
0.35783343432      0.30205908942
1 p
0.13820085283      1.0000000000
1 p
0.36000000000E-01  1.0000000000
4 d
4.6170975867      -0.13574476955E-01
1.5663438480      0.20374310496
0.66952425826      0.42997453105
0.27140946867      0.41799754848
1 d
0.10054426592      1.0000000000
1 f
0.52270000000      1.0000000000
*

```

```

nb def2-ecp
*
  ncore =    28          lmax =    3
#   coefficient      r^n      exponent
f
  -22.9295500      2      8.4900000
  -3.6663099      2      4.2500000
s-f
  165.1791435      2      8.9000000
  21.9929744      2      4.4300000
  22.9295500      2      8.4900000
  3.6663099      2      4.2500000
p-f
  111.7944145      2      7.7700000
  16.6334833      2      3.9600000
  22.9295500      2      8.4900000
  3.6663099      2      4.2500000
d-f
  38.1122488      2      6.0500000
  8.0391673      2      2.8400000
  22.9295500      2      8.4900000
  3.6663099      2      4.2500000
*
*
mo def2-SVP
# mo      (7s6p5d1f) / [5s3p2d1f]      {31111/411/41/1}
*
  3 s
  7.2033800000      -0.89310617237
  5.0522950000      1.6074095756
  2.9135330000      0.27804186088
  1 s
  0.97858218681      1.0000000000
  1 s
  0.44369153753      1.0000000000
  1 s
  0.92150090705E-01      1.0000000000
  1 s
  0.34802246935E-01      1.0000000000
  4 p
  3.1518660000      -0.71873040872
  2.4534820000      0.76442887870
  0.85030192180      0.64808585640
  0.36918237179      0.26792115234
  1 p
  0.13490627460      1.0000000000
  1 p
  0.38200000000E-01      1.0000000000
  4 d
  5.0044445497      -0.21587364862E-01
  1.7736823324      0.20958680086
  0.76950591696      0.43730880599
  0.31530878939      0.41123927009
  1 d
  0.11754374390      1.0000000000
  1 f
  0.65545000000      1.0000000000
*
mo def2-ecp
*

```

```

ncore = 28          lmax = 3
#      coefficient  r^n      exponent
f      -24.8051771  2        9.4500000
      -4.1537815   2        4.7200000
s-f    180.1031085  2        9.7145938
      24.9972279   2        4.6805004
      24.8051771   2        9.4500000
      4.1537815    2        4.7200000
p-f    123.7727523  2        8.1421366
      19.5302280   2        4.6259863
      24.8051771   2        9.4500000
      4.1537815    2        4.7200000
d-f    48.3750223   2        6.6184148
      8.8920527    2        3.2487516
      24.8051771   2        9.4500000
      4.1537815    2        4.7200000
*
*
tc def2-SVP
# tc      (7s6p5d1f) / [5s3p2d1f]      {31111/411/41/1}
*
  3 s
  7.4344020000      -1.1436289973
  5.5513270000       1.8752000559
  3.0230860000       0.23952854431
  1 s
  1.0647443990       1.0000000000
  1 s
  0.48127808497      1.0000000000
  1 s
  0.98299016952E-01  1.0000000000
  1 s
  0.36659977936E-01  1.0000000000
  4 p
  3.4490050000      -0.72277510434
  2.6927370000       0.76458962802
  0.94427370692      0.64533225171
  0.41348148619      0.27195668811
  1 p
  0.15488152305      1.0000000000
  1 p
  0.40300000000E-01  1.0000000000
  4 d
  5.0906268699      -0.32176405405E-01
  2.0156178510       0.21280802536
  0.88113887240      0.44403309175
  0.36427094833      0.40796933085
  1 d
  0.13678402297      1.0000000000
  1 f
  0.79085000000      1.0000000000
*
tc def2-ecp
*
ncore = 28          lmax = 3
#      coefficient  r^n      exponent

```

```

f
      -26.5624475    2    10.4000000
      -4.5856805    2    5.2000000
s-f
      195.1591659    2    10.4223462
      28.0926033    2    5.0365160
      26.5624475    2    10.4000000
      4.5856805    2    5.2000000
p-f
      135.2845662    2    8.9504494
      21.8065043    2    4.8544394
      26.5624475    2    10.4000000
      4.5856805    2    5.2000000
d-f
      54.3297294    2    6.9456968
      11.1550679    2    3.9705849
      26.5624475    2    10.4000000
      4.5856805    2    5.2000000
*
*
ru def2-SVP
# ru      (7s6p5d1f) / [5s3p2d1f]      {31111/411/41/1}
*
  3 s
  7.9365700000    -1.1772083350
  5.9842450000    1.6197059592
  4.8822200000    0.51065807556
  1 s
  1.1031002163    1.0000000000
  1 s
  0.49818875261    1.0000000000
  1 s
  0.10678711393    1.0000000000
  1 s
  0.39191775872E-01  1.0000000000
  4 p
  3.7546090000    -0.70777873563
  2.9165710000    0.74954391484
  1.0322209568    0.64660609645
  0.45249553774    0.27029086816
  1 p
  0.16987042198    1.0000000000
  1 p
  0.430000000000E-01  1.0000000000
  4 d
  5.7341846619    -0.35266111560E-01
  2.2483686294    0.21802502222
  0.98376978359    0.44709565013
  0.40379445583    0.40371732508
  1 d
  0.14978618173    1.0000000000
  1 f
  0.94314000000    1.0000000000
*
ru def2-ecp
*
  ncore =    28      lmax =    3
#      coefficient  r^n      exponent
f
      -28.3406163    2    11.3600000

```

```

-4.9446292      2      5.6800000
s-f
209.8229712    2      11.1052693
30.6547264     2      5.4147454
28.3406163     2      11.3600000
4.9446292      2      5.6800000
p-f
146.3361823    2      9.7712707
24.1278772     2      5.0739908
28.3406163     2      11.3600000
4.9446292      2      5.6800000
d-f
67.5158967     2      7.6714231
9.8701041      2      4.1365647
28.3406163     2      11.3600000
4.9446292      2      5.6800000
*
*
rh def2-SVP
# rh      (7s6p5d1f) / [5s3p2d1f]      {31111/411/41/1}
*
  3 s
  7.9177440000      1.4014042010
  6.8412070000      -1.7975072656
  2.9598400000      -0.16225754497
  1 s
  1.3166643441      0.87495110714
  1 s
  0.56907152172     1.00000000000
  1 s
  0.10059695193     1.00000000000
  1 s
  0.37071460798E-01 1.00000000000
  4 p
  4.1360790000      -0.55183328018
  2.9462810000      0.61370533515
  1.0792431924      0.64005434538
  0.46611217769     0.25958050755
  1 p
  0.17453169991     1.00000000000
  1 p
  0.41000000000E-01 1.00000000000
  4 d
  6.8847131641      -0.15962387985E-01
  2.3837304391      0.23047555829
  1.0184384022      0.44075804028
  0.39957494644     0.39567661996
  1 d
  0.13951120264     1.00000000000
  1 f
  1.0949900000      1.00000000000
*
rh def2-ecp
*
ncore =      28      lmax =      3
# coefficient  r^n      exponent
f
-30.0934557    2      12.3100000
-5.2184819     2      6.1600000
s-f

```

|             |                         |                    |                  |
|-------------|-------------------------|--------------------|------------------|
|             | 225.3477535             | 2                  | 11.7200000       |
|             | 32.8231890              | 2                  | 5.8200000        |
|             | 30.0934557              | 2                  | 12.3100000       |
|             | 5.2184819               | 2                  | 6.1600000        |
| p-f         |                         |                    |                  |
|             | 158.7094116             | 2                  | 10.4200000       |
|             | 26.4441005              | 2                  | 5.4500000        |
|             | 30.0934557              | 2                  | 12.3100000       |
|             | 5.2184819               | 2                  | 6.1600000        |
| d-f         |                         |                    |                  |
|             | 62.7586257              | 2                  | 8.8200000        |
|             | 10.9787195              | 2                  | 3.8700000        |
|             | 30.0934557              | 2                  | 12.3100000       |
|             | 5.2184819               | 2                  | 6.1600000        |
| *           |                         |                    |                  |
| *           |                         |                    |                  |
| pd def2-SVP |                         |                    |                  |
| # pd        | (7s6p5d1f) / [5s3p2d1f] |                    | {31111/411/41/1} |
| *           |                         |                    |                  |
| 3 s         |                         |                    |                  |
|             | 8.4756400000            | 1.2392391076       |                  |
|             | 7.1657170000            | -1.6563109970      |                  |
|             | 3.1821100000            | -0.13178619060     |                  |
| 1 s         |                         |                    |                  |
|             | 1.3973644196            | 1.0000000000       |                  |
| 1 s         |                         |                    |                  |
|             | 0.60532955868           | 1.0000000000       |                  |
| 1 s         |                         |                    |                  |
|             | 0.10229514209           | 1.0000000000       |                  |
| 1 s         |                         |                    |                  |
|             | 0.37338972881E-01       | 1.0000000000       |                  |
| 4 p         |                         |                    |                  |
|             | 4.2460970000            | -0.82324104973     |                  |
|             | 3.3925940000            | 0.87084659933      |                  |
|             | 1.1975891264            | 0.63512225791      |                  |
|             | 0.52673750585           | 0.27225338752      |                  |
| 1 p         |                         |                    |                  |
|             | 0.20607094098           | 1.0000000000       |                  |
| 1 p         |                         |                    |                  |
|             | 0.37000000000E-01       | 1.0000000000       |                  |
| 4 d         |                         |                    |                  |
|             | 7.3613290985            | -0.17199885828E-01 |                  |
|             | 2.6291037258            | 0.23313745275      |                  |
|             | 1.1292744634            | 0.44536385867      |                  |
|             | 0.44471659896           | 0.39293650406      |                  |
| 1 d         |                         |                    |                  |
|             | 0.15544893836           | 1.0000000000       |                  |
| 1 f         |                         |                    |                  |
|             | 1.2462900000            | 1.0000000000       |                  |
| *           |                         |                    |                  |
| pd def2-ecp |                         |                    |                  |
| *           |                         |                    |                  |
| ncore =     | 28                      | lmax =             | 3                |
| #           | coefficient             | r^n                | exponent         |
| f           |                         |                    |                  |
|             | -31.9295543             | 2                  | 13.2700000       |
|             | -5.3982169              | 2                  | 6.6300000        |
| s-f         |                         |                    |                  |
|             | 240.2290403             | 2                  | 12.4300000       |
|             | 35.1719435              | 2                  | 6.1707594        |

|             |                         |                    |                  |
|-------------|-------------------------|--------------------|------------------|
|             | 31.9295543              | 2                  | 13.2700000       |
|             | 5.3982169               | 2                  | 6.6300000        |
| p-f         | 170.4172760             | 2                  | 11.0800000       |
|             | 28.4721329              | 2                  | 5.8295541        |
|             | 31.9295543              | 2                  | 13.2700000       |
|             | 5.3982169               | 2                  | 6.6300000        |
| d-f         | 69.0138449              | 2                  | 9.5100000        |
|             | 11.7508616              | 2                  | 4.1397811        |
|             | 31.9295543              | 2                  | 13.2700000       |
|             | 5.3982169               | 2                  | 6.6300000        |
| *           |                         |                    |                  |
| *           |                         |                    |                  |
| ag def2-SVP |                         |                    |                  |
| # ag        | (7s6p5d1f) / [5s3p2d1f] |                    | {31111/411/41/1} |
| *           |                         |                    |                  |
|             | 3 s                     |                    |                  |
|             | 9.0884420000            | -1.9808918797      |                  |
|             | 7.5407310000            | 2.7554513347       |                  |
|             | 2.7940050000            | 0.22715408381      |                  |
|             | 1 s                     |                    |                  |
|             | 1.4918135849            | 1.0000000000       |                  |
|             | 1 s                     |                    |                  |
|             | 0.63579159445           | 1.0000000000       |                  |
|             | 1 s                     |                    |                  |
|             | 0.10368414161           | 1.0000000000       |                  |
|             | 1 s                     |                    |                  |
|             | 0.37460004363E-01       | 1.0000000000       |                  |
|             | 4 p                     |                    |                  |
|             | 4.4512400000            | -0.99352103771     |                  |
|             | 3.6752630000            | 1.0500525237       |                  |
|             | 1.2610620905            | 0.64747532537      |                  |
|             | 0.54212477498           | 0.25621550723      |                  |
|             | 1 p                     |                    |                  |
|             | 0.20221617026           | 1.0000000000       |                  |
|             | 1 p                     |                    |                  |
|             | 0.41200000000E-01       | 1.0000000000       |                  |
|             | 4 d                     |                    |                  |
|             | 7.7956672292            | -0.17042912377E-01 |                  |
|             | 2.8926510238            | 0.23446154803      |                  |
|             | 1.2474273203            | 0.44765877533      |                  |
|             | 0.49313817671           | 0.39064954560      |                  |
|             | 1 d                     |                    |                  |
|             | 0.17285032603           | 1.0000000000       |                  |
|             | 1 f                     |                    |                  |
|             | 1.3971100000            | 1.0000000000       |                  |
| *           |                         |                    |                  |
| ag def2-ecp |                         |                    |                  |
| *           |                         |                    |                  |
|             | ncore = 28              | lmax = 3           |                  |
| #           | coefficient             | r^n                | exponent         |
| f           |                         |                    |                  |
|             | -33.6899201             | 2                  | 14.2200000       |
|             | -5.5311202              | 2                  | 7.1100000        |
| s-f         | 255.1393645             | 2                  | 13.1300000       |
|             | 36.8661215              | 2                  | 6.5100000        |
|             | 33.6899201              | 2                  | 14.2200000       |
|             | 5.5311202               | 2                  | 7.1100000        |



```

p-f
    182.1818687    2    11.7400000
    30.3577515    2    6.2000000
    33.6899201    2    14.2200000
    5.5311202     2    7.1100000
d-f
    73.7192609    2    10.2100000
    12.5021171    2    4.3800000
    33.6899201    2    14.2200000
    5.5311202     2    7.1100000
*
*
cd def2-SVP
# cd      (7s6p5d1f) / [5s3p2d1f]      {31111/411/41/1}
*
  3 s
  9.7270110000    -1.7930075316
  7.8375230000     2.6110318971
  5.0891940000     0.10748428949
  1 s
  1.4981738327     1.0000000000
  1 s
  0.67281383129     1.0000000000
  1 s
  0.13297424875     1.0000000000
  1 s
  0.46915090488E-01  1.0000000000
  4 p
  4.7427160000    -1.0411923051
  3.9366550000     1.1003682332
  1.3569243142     0.65366639411
  0.58791569541     0.24632369113
  1 p
  0.21371239619     1.0000000000
  1 p
  0.51600000000E-01  1.0000000000
  4 d
  7.8631040859    -0.21376239365E-01
  3.2935059133     0.22596399568
  1.4503676025     0.45294402972
  0.59373316766     0.39218971958
  1 d
  0.21760141520     1.0000000000
  1 f
  1.5981300000     1.0000000000
*
cd def2-ecp
*
  ncore =    28      lmax =    3
#      coefficient      r^n      exponent
f
    -35.4766256     2      15.1847957
    -5.6176768     2      7.5923978
s-f
    270.0094832     2      13.8358689
    38.7673080     2      6.8572704
    35.4766256     2      15.1847957
    5.6176768     2      7.5923978
p-f
    193.8296294     2      12.4049710

```

```

31.8965252      2      6.5677995
35.4766256      2      15.1847957
5.6176768       2      7.5923978
d-f
79.1936470      2      10.8969253
13.2308267      2      4.6411649
35.4766256      2      15.1847957
5.6176768       2      7.5923978
*
*
in def2-SVP
# in      (10s7p6d) / [4s4p2d]      {6211/4111/51}
*
  6 s
283.52297445    0.70132141424E-03
23.324282101   -0.90887432418E-01
16.868026844    0.28096825177
6.7866498137   -0.70697832452
1.6782596016    0.98671644913
0.78396870439   0.62568576302
  2 s
1.8276654775   -0.34151640249
0.83753492534   -0.59696724334
  1 s
0.16643068973    1.0000000000
  1 s
0.61143742809E-01  1.0000000000
  4 p
14.699191826    0.92248042349E-01
8.8709038051   -0.32437029300
1.1342905889    0.61162217018
0.52667652433   0.17609640386
  1 p
2.3284433667    1.0000000000
  1 p
0.16859144934    1.0000000000
  1 p
0.50070381081E-01  1.0000000000
  5 d
31.378655926    0.54007004722E-02
18.290046326   -0.11208558948E-01
3.2551894590    0.30384519161
1.3874842584    0.54078109979
0.54248962672   0.38232680038
  1 d
0.18000000000    1.0000000000
*
in def2-ecp
*
  ncore =      28      lmax =      3
#      coefficient      r^n      exponent
f
      -13.7280780      2      12.5390560
      -18.2068660      2      12.5525610
s-f
      281.1223500      2      15.3928220
      61.9014700      2      8.0558640
      13.7280780      2      12.5390560
      18.2068660      2      12.5525610
p-f

```

|             |                      |                    |                |
|-------------|----------------------|--------------------|----------------|
|             | 67.4621540           | 2                  | 13.9286720     |
|             | 134.9492500          | 2                  | 13.3472340     |
|             | 14.7461400           | 2                  | 7.6141320      |
|             | 29.6392620           | 2                  | 7.3183650      |
|             | 13.7280780           | 2                  | 12.5390560     |
|             | 18.2068660           | 2                  | 12.5525610     |
| d-f         |                      |                    |                |
|             | 35.4932540           | 2                  | 14.0347150     |
|             | 53.1787730           | 2                  | 14.5116160     |
|             | 9.1772810            | 2                  | 5.5505500      |
|             | 12.3924100           | 2                  | 5.0594150      |
|             | 13.7280780           | 2                  | 12.5390560     |
|             | 18.2068660           | 2                  | 12.5525610     |
| *           |                      |                    |                |
| *           |                      |                    |                |
| sn def2-SVP |                      |                    |                |
| # sn        | (10s7p6d) / [4s4p2d] |                    | {6211/4111/51} |
| *           |                      |                    |                |
|             | 6 s                  |                    |                |
|             | 375.95156177         | 0.15224884228E-02  |                |
|             | 23.661818008         | -0.16776065030     |                |
|             | 19.946281315         | 0.33989090393      |                |
|             | 6.8240270454         | -0.84441791529     |                |
|             | 1.8771488722         | 0.92646952846      |                |
|             | 0.82033199226        | 0.53091094490      |                |
|             | 2 s                  |                    |                |
|             | 10.341549887         | -0.90331119154E-02 |                |
|             | 1.3672524155         | 0.22980877714      |                |
|             | 1 s                  |                    |                |
|             | 0.18314843823        | 1.0000000000       |                |
|             | 1 s                  |                    |                |
|             | 0.69547226146E-01    | 1.0000000000       |                |
|             | 4 p                  |                    |                |
|             | 21.293597748         | 0.37103218279E-01  |                |
|             | 8.8171842499         | -0.32351709661     |                |
|             | 1.2347028371         | 0.83846760898      |                |
|             | 0.57869142617        | 0.23294977050      |                |
|             | 1 p                  |                    |                |
|             | 2.5084050284         | 1.0000000000       |                |
|             | 1 p                  |                    |                |
|             | 0.21298577719        | 1.0000000000       |                |
|             | 1 p                  |                    |                |
|             | 0.67364584657E-01    | 1.0000000000       |                |
|             | 5 d                  |                    |                |
|             | 39.693023177         | 0.39185734275E-02  |                |
|             | 20.852179275         | -0.68210073667E-02 |                |
|             | 3.6907832774         | 0.27938420495      |                |
|             | 1.5849404530         | 0.52607409874      |                |
|             | 0.62772693365        | 0.36149465348      |                |
|             | 1 d                  |                    |                |
|             | 0.20500000000        | 1.0000000000       |                |
| *           |                      |                    |                |
| sn def2-ecp |                      |                    |                |
| *           |                      |                    |                |
|             | ncore = 28           | lmax = 3           |                |
| #           | coefficient          | r^n                | exponent       |
| f           |                      |                    |                |
|             | -12.5763330          | 2                  | 12.2823480     |
|             | -16.5959440          | 2                  | 12.2721500     |
| s-f         |                      |                    |                |

|     |             |   |            |
|-----|-------------|---|------------|
|     | 279.9886820 | 2 | 17.4204140 |
|     | 62.3778100  | 2 | 7.6311550  |
|     | 12.5763330  | 2 | 12.2823480 |
|     | 16.5959440  | 2 | 12.2721500 |
| p-f |             |   |            |
|     | 66.1625230  | 2 | 16.1310240 |
|     | 132.1743960 | 2 | 15.6280770 |
|     | 16.3394170  | 2 | 7.3256080  |
|     | 32.4889590  | 2 | 6.9425190  |
|     | 12.5763330  | 2 | 12.2823480 |
|     | 16.5959440  | 2 | 12.2721500 |
| d-f |             |   |            |
|     | 36.3874410  | 2 | 15.5149760 |
|     | 54.5078410  | 2 | 15.1881600 |
|     | 8.6968230   | 2 | 5.4560240  |
|     | 12.8402080  | 2 | 5.3631050  |
|     | 12.5763330  | 2 | 12.2823480 |
|     | 16.5959440  | 2 | 12.2721500 |

\*  
\*

sb def2-SVP

# sb (10s7p6d) / [4s4p2d] {6211/4111/51}

\*

|                   |   |                    |  |
|-------------------|---|--------------------|--|
| 6                 | s |                    |  |
| 372.76139166      |   | 0.15878057239E-02  |  |
| 22.689478596      |   | -0.15027605583     |  |
| 18.391547037      |   | 0.35915813039      |  |
| 7.6406271414      |   | -0.74805091065     |  |
| 1.9052000235      |   | 0.92017581656      |  |
| 0.93007107773     |   | 0.46754079597      |  |
| 2                 | s |                    |  |
| 10.584496987      |   | -0.14845336778E-01 |  |
| 1.4680242769      |   | 0.35289492025      |  |
| 1                 | s |                    |  |
| 0.21621190032     |   | 1.0000000000       |  |
| 1                 | s |                    |  |
| 0.83546307041E-01 |   | 1.0000000000       |  |
| 4                 | p |                    |  |
| 15.926550950      |   | 0.13206950012      |  |
| 10.052739237      |   | -0.41511149340     |  |
| 1.2682183726      |   | 0.74197972626      |  |
| 0.57196620929     |   | 0.15580772750      |  |
| 1                 | p |                    |  |
| 2.6190751238      |   | 1.0000000000       |  |
| 1                 | p |                    |  |
| 0.25183282652     |   | 1.0000000000       |  |
| 1                 | p |                    |  |
| 0.83389127684E-01 |   | 1.0000000000       |  |
| 5                 | d |                    |  |
| 45.485063360      |   | 0.32556415807E-02  |  |
| 18.504059617      |   | -0.54952972010E-02 |  |
| 3.9156032308      |   | 0.27988806353      |  |
| 1.7142196009      |   | 0.51273377761      |  |
| 0.69675478242     |   | 0.33288802736      |  |
| 1                 | d |                    |  |
| 0.23060000000     |   | 1.0000000000       |  |

\*

sb def2-ecp

\*

ncore = 28 lmax = 3

| #   | coefficient       | r^n                  | exponent       |
|-----|-------------------|----------------------|----------------|
| f   | -15.3668010       | 2                    | 14.4449780     |
|     | -20.2961380       | 2                    | 14.4492950     |
| s-f | 281.0715810       | 2                    | 16.3308650     |
|     | 61.7166040        | 2                    | 8.5565420      |
|     | 15.3668010        | 2                    | 14.4449780     |
|     | 20.2961380        | 2                    | 14.4492950     |
| p-f | 67.4573800        | 2                    | 14.4703370     |
|     | 134.9335030       | 2                    | 13.8161940     |
|     | 14.7163440        | 2                    | 8.4249240      |
|     | 29.5185120        | 2                    | 8.0927280      |
|     | 15.3668010        | 2                    | 14.4449780     |
|     | 20.2961380        | 2                    | 14.4492950     |
| d-f | 35.4478150        | 2                    | 14.8863310     |
|     | 53.1434660        | 2                    | 15.1463190     |
|     | 9.1792230         | 2                    | 5.9082670      |
|     | 13.2402530        | 2                    | 5.5943220      |
|     | 15.3668010        | 2                    | 14.4449780     |
|     | 20.2961380        | 2                    | 14.4492950     |
| *   |                   |                      |                |
| *   |                   |                      |                |
| te  | def2-SVP          |                      |                |
| #   | te                | (10s7p6d) / [4s4p2d] | {6211/4111/51} |
| *   |                   |                      |                |
|     | 6 s               |                      |                |
|     | 396.47954659      | 0.26307731203E-02    |                |
|     | 21.919773309      | -0.13203517066       |                |
|     | 18.061271390      | 0.36203197834        |                |
|     | 8.1403463241      | -0.75591120276       |                |
|     | 2.0705998798      | 0.79192928400        |                |
|     | 0.97715185085     | 0.40558342540        |                |
|     | 2 s               |                      |                |
|     | 11.263563841      | -0.15212984183E-01   |                |
|     | 1.6122696062      | 0.35202140517        |                |
|     | 1 s               |                      |                |
|     | 0.25095401705     | 1.0000000000         |                |
|     | 1 s               |                      |                |
|     | 0.97478452576E-01 | 1.0000000000         |                |
|     | 4 p               |                      |                |
|     | 17.479502221      | 0.11517799182        |                |
|     | 10.433943171      | -0.41205302672       |                |
|     | 1.3623024763      | 0.78760578076        |                |
|     | 0.59239616258     | 0.15283299018        |                |
|     | 1 p               |                      |                |
|     | 2.7961737670      | 1.0000000000         |                |
|     | 1 p               |                      |                |
|     | 0.29766401026     | 1.0000000000         |                |
|     | 1 p               |                      |                |
|     | 0.96151090240E-01 | 1.0000000000         |                |
|     | 5 d               |                      |                |
|     | 50.821835991      | 0.33763474774E-02    |                |
|     | 18.884095378      | -0.35221408938E-02   |                |
|     | 4.2527304630      | 0.28254216065        |                |
|     | 1.8757557092      | 0.52039372916        |                |
|     | 0.77069282849     | 0.32213541689        |                |
|     | 1 d               |                      |                |

```

0.250000000000      1.000000000000
*
te def2-ecp
*
ncore =      28          lmax =      3
# coefficient      r^n          exponent
f
      -15.7454500      2          15.2061680
      -20.7424480      2          15.2017020
s-f
      281.0458430      2          16.8144730
      61.6206560      2           8.7935260
      15.7454500      2          15.2061680
      20.7424480      2          15.2017020
p-f
      67.4494640      2          14.8778010
      134.9043040      2          14.2697310
      14.6895470      2           8.7244350
      29.4150630      2           8.2915150
      15.7454500      2          15.2061680
      20.7424480      2          15.2017020
d-f
      35.4320570      2          15.2050080
      53.1356870      2          15.2258480
      9.0698020      2           6.0717690
      13.1223040      2           5.8047600
      15.7454500      2          15.2061680
      20.7424480      2          15.2017020
*
*
i def2-SVP
# i      (10s7p6d) / [4s4p2d]      {6211/4111/51}
*
  6 s
445.90489176      0.20037290389E-02
23.336842412      -0.14989397324
19.583446104      0.36436474913
8.5112089186      -0.75538138199
2.1996161861      0.82816359356
1.0668970454      0.42161048110
  2 s
11.720547572      -0.16160234511E-01
1.7625986449      0.35271525193
  1 s
0.28697476318      1.00000000000
  1 s
0.11227609607      1.00000000000
  4 p
20.499027254      0.77159335656E-01
10.558754576      -0.38370372780
1.5015895485      0.83554174719
0.64597173095      0.16787259488
  1 p
3.0288656771      1.00000000000
  1 p
0.34506591841      1.00000000000
  1 p
0.11134513813      1.00000000000
  5 d
51.235354920      0.40345130346E-02

```

```

15.616239482      -0.50768108881E-02
4.5266002139      0.29151065356
2.0529808766      0.51145783605
0.87640281623     0.31232025297
  1 d
0.30900000000     1.00000000000
*
i def2-ecp
*
  ncore =    28      lmax =    3
#   coefficient   r^n      exponent
f
  -21.8420400     2        19.4586090
  -28.4681910     2        19.3492600
   -0.2437130     2         4.8237670
   -0.3208040     2         4.8843150
s-f
  49.9942930     2        40.0158350
 281.0253170     2        17.4297470
  61.5733260     2         9.0054840
  21.8420400     2        19.4586090
  28.4681910     2        19.3492600
   0.2437130     2         4.8237670
   0.3208040     2         4.8843150
p-f
  67.4428410     2        15.3554660
134.8811370     2        14.9718330
  14.6750510     2         8.9601640
  29.3756660     2         8.2590960
  21.8420400     2        19.4586090
  28.4681910     2        19.3492600
   0.2437130     2         4.8237670
   0.3208040     2         4.8843150
d-f
  35.4395290     2        15.0689080
  53.1760570     2        14.5553220
   9.0671950     2         6.7186470
  13.2069370     2         6.4563930
   0.0893350     2         1.1917790
   0.0523800     2         1.2911570
  21.8420400     2        19.4586090
  28.4681910     2        19.3492600
   0.2437130     2         4.8237670
   0.3208040     2         4.8843150
*
*
xe def2-SVP
# xe   (11s10p8d2f) / [6s5p3d2f]   {521111/34111/611/11}
*
  5 s
6420.2481656     0.25092173886E-03
983.54530664     0.16251948178E-02
219.43881364     0.46037106451E-02
23.012587807     -0.14698707182
18.048324490     0.57524870348
  2 s
11.752550163     0.66038420156
6.2390917199     0.38470524721
  1 s
2.6257211320     1.00000000000

```

```

1 s
1.2905042943      1.0000000000
1 s
0.36204185060    1.0000000000
1 s
0.14069888091    1.0000000000
3 p
193.81432545     0.95394802497E-03
21.725228086     0.57393353332E-01
9.8891605641     -0.27974266640
4 p
13.960683826     -0.50950157807E-01
4.0928947097     0.36669211800
2.2546815460     0.72619456861
1.1546596184     0.35555871740
1 p
0.52321923128    1.0000000000
1 p
0.21945569800    1.0000000000
1 p
0.86158996836E-01 1.0000000000
6 d
135.60300038     0.81873543290E-03
38.727062692     0.60897654151E-02
15.377328089     -0.92782985596E-02
5.2602537686     0.22890785589
2.6590627424     0.44434407051
1.2938205124     0.36029482992
1 d
0.58050830139    1.0000000000
1 d
0.18000000000    1.0000000000
1 f
0.49652793000    1.0000000000
1 f
2.50000000000    1.0000000000
*
xe def2-ecp
*
ncore = 28      lmax = 3
#      coefficient  r^n      exponent
f
      -23.0892950    2        20.8815570
      -30.0744750    2        20.7834430
      -0.2882270    2         5.2533890
      -0.3869240    2         5.3611880
s-f
      49.9979620    2         40.0051840
      281.0133030   2         17.8122140
      61.5382550    2          9.3041500
      23.0892950    2        20.8815570
      30.0744750    2        20.7834430
      0.2882270    2         5.2533890
      0.3869240    2         5.3611880
p-f
      67.4391420    2        15.7017720
      134.8747110   2        15.2586080
      14.6633000    2          9.2921840
      29.3547300    2         8.5590030
      23.0892950    2        20.8815570

```



|     |            |   |            |
|-----|------------|---|------------|
|     | 30.0744750 | 2 | 20.7834430 |
|     | 0.2882270  | 2 | 5.2533890  |
|     | 0.3869240  | 2 | 5.3611880  |
| d-f |            |   |            |
|     | 35.4369080 | 2 | 15.1856000 |
|     | 53.1957720 | 2 | 14.2845000 |
|     | 9.0462320  | 2 | 7.1218890  |
|     | 13.2236810 | 2 | 6.9919630  |
|     | 0.0848530  | 2 | 0.6239460  |
|     | 0.0441550  | 2 | 0.6472840  |
|     | 23.0892950 | 2 | 20.8815570 |
|     | 30.0744750 | 2 | 20.7834430 |
|     | 0.2882270  | 2 | 5.2533890  |
|     | 0.3869240  | 2 | 5.3611880  |

\*

\*

cs def2-SVP

# cs (7s6p2d) / [5s3p2d] {31111/411/11}

\*

|                   |   |                   |  |
|-------------------|---|-------------------|--|
| 3                 | s |                   |  |
| 5.8778113443      |   | 0.12859994983     |  |
| 4.3631538286      |   | -0.34632569725    |  |
| 1.8048475155      |   | 0.69930637051     |  |
| 1                 | s |                   |  |
| 0.37485237136     |   | 1.0000000000      |  |
| 1                 | s |                   |  |
| 0.16384858778     |   | 1.0000000000      |  |
| 1                 | s |                   |  |
| 0.27230462048E-01 |   | 1.0000000000      |  |
| 1                 | s |                   |  |
| 0.11991533212E-01 |   | 1.0000000000      |  |
| 4                 | p |                   |  |
| 4.2751856154      |   | 0.45723074174E-01 |  |
| 1.9656663360      |   | -0.25019961976    |  |
| 0.47689195212     |   | 0.55660850066     |  |
| 0.21529749588     |   | 0.58218553406     |  |
| 1                 | p |                   |  |
| 0.91450850296E-01 |   | 1.0000000000      |  |
| 1                 | p |                   |  |
| 0.17592078473E-01 |   | 1.0000000000      |  |
| 1                 | d |                   |  |
| 0.13300000000     |   | 1.0000000000      |  |
| 1                 | d |                   |  |
| 0.33216214821E-01 |   | 1.0000000000      |  |

\*

cs def2-ecp

\*

|         |             |        |           |
|---------|-------------|--------|-----------|
| ncore = | 46          | lmax = | 3         |
| #       | coefficient | r^n    | exponent  |
| f       | -28.8843090 | 2      | 3.1232690 |
| s-f     |             |        |           |
|         | 84.5477300  | 2      | 4.0797500 |
|         | 16.6541730  | 2      | 2.4174060 |
|         | 28.8843090  | 2      | 3.1232690 |
| p-f     |             |        |           |
|         | 157.0490590 | 2      | 5.5140800 |
|         | 26.4233070  | 2      | 2.1603160 |
|         | 28.8843090  | 2      | 3.1232690 |
| d-f     |             |        |           |

```

13.1727530    2    1.8074100
3.3428330    2    0.8581820
28.8843090   2    3.1232690
*
*
ba def2-SVP
# ba      (6s6p5d) / [4s3p2d]      {3111/411/41}
*
  3 s
  2.3961900000    -5.9554766710
  2.2433050000     6.6805648241
  0.717402000000  -0.57055347037
  1 s
  0.27420073547    1.0000000000
  1 s
  0.40933264188E-01  1.0000000000
  1 s
  0.18060156423E-01  1.0000000000
  4 p
  2.9267420000     0.79815276764
  2.5207180000    -1.0707548832
  0.67578180854    0.34940781448
  0.31985844531    0.65041110673
  1 p
  0.13221792446    1.0000000000
  1 p
  0.33039565349E-01  1.0000000000
  4 d
  0.966315000000   -0.90893800000
  0.893828000000    0.94724000000
  0.273195000000    0.32205700000
  0.103891000000    0.47326000000
  1 d
  0.35578000000E-01  0.36597700000
*
ba def2-ecp
*
  ncore =    46      lmax =    3
#      coefficient  r^n      exponent
f
  -33.4731740      2      3.5894650
s-f
  427.8458160      2      9.5269860
  204.4175300      2      4.4875100
  33.4731740      2      3.5894650
p-f
  293.6058640      2      8.3159300
  294.1933160      2      4.2922170
  33.4731740      2      3.5894650
d-f
  112.5504020      2      5.9161080
  181.7826210      2      2.8748420
  33.4731740      2      3.5894650
*
*
la def2-SVP
# la      (7s6p5d1f) / [6s3p2d1f]  {211111/411/41/1}
*
  2 s
  5.0873990000    -0.44173707857

```

```

4.2709780000      0.85812489720
 1 s
2.1823803999      1.00000000000
 1 s
0.48954926461     1.00000000000
 1 s
0.23292032550     1.00000000000
 1 s
0.55595529876E-01 1.00000000000
 1 s
0.22795184937E-01 1.00000000000
 4 p
3.0251610000     -0.28580266655
2.3820950000      0.51718364644
0.67246658081    -0.44823115995
0.32519427171    -0.58864843930
 1 p
0.13635489374     1.00000000000
 1 p
0.25100000000E-01 1.00000000000
 4 d
1.2667182018     -0.17445579381
0.89049882672     0.25137236211
0.32947291040     0.44604068240
0.13398788830     0.44878277154
 1 d
0.51275503081E-01 1.00000000000
 1 f
0.25683000000     1.00000000000
*
la def2-ecp
*
  ncore =      46          lmax =      3
#      coefficient      r^n      exponent
f
s-f      -36.0100160      2      4.0286000
          91.9321770      2      3.3099000
          -3.7887640      2      1.6550000
          36.0100160      2      4.0286000
p-f
          63.7594860      2      2.8368000
          -0.6479580      2      1.4184000
          36.0100160      2      4.0286000
d-f
          36.1161730      2      2.0213000
          0.2191140      2      1.0107000
          36.0100160      2      4.0286000
*
*
hf def2-SVP
# hf      (7s6p5d1f) / [6s3p2d1f]      {211111/411/41/1}
*
  2 s
14.592485000     -0.80196298812
11.547491000     1.5261602829
 1 s
4.9112973928     1.00000000000
 1 s
0.79665469409     1.00000000000

```

```

1 s
0.34234072894      1.0000000000
1 s
0.98109197714E-01  1.0000000000
1 s
0.36190984443E-01  1.0000000000
4 p
6.7265310000      0.65076205466
5.9599790000     -0.83713508620
1.0921117054      0.50570506286
0.49702823217     0.51965388691
1 p
0.20258973792     1.0000000000
1 p
0.336000000000E-01  1.0000000000
4 d
3.9820623229     -0.42446023944E-01
1.3077987772      0.18409232564
0.53272310298     0.41484423516
0.20564954488     0.44224303497
1 d
0.73099858787E-01  1.0000000000
1 f
0.31547000000     1.0000000000
*
hf def2-ecp
*
ncore =      60      lmax =      3
#      coefficient  r^n      exponent
f
      10.0467225    2        1.7857698
s-f
      1499.2847107  2        14.7699590
      40.2821014   2        7.3849794
      -10.0467225  2        1.7857698
p-f
      397.7330053   2        9.8494895
      19.3164059   2        4.9247445
      -10.0467225  2        1.7857698
d-f
      101.3298053   2        6.0967564
      5.8734382    2        3.0483782
      -10.0467225  2        1.7857698
*
*
ta def2-SVP
# ta      (7s6p5d1f) / [6s3p2d1f]      {211111/411/41/1}
*
2 s
14.400000000      0.99343296745
12.000000000     -1.6510077975
1 s
5.0701477302      1.0000000000
1 s
0.86033356487     1.0000000000
1 s
0.37158938894     1.0000000000
1 s
0.10745336254     1.0000000000
1 s

```

```

0.39142776556E-01  1.0000000000
  4 p
  7.4188720000      0.26979695152
  5.6984100000     -0.46968874449
  1.1777211960     0.50905100155
  0.54478533555    0.52298161137
  1 p
  0.22309270117    1.00000000000
  1 p
  0.43100000000E-01 1.00000000000
  4 d
  3.9738796278    -0.52799310714E-01
  1.4528884813    0.18558319471
  0.61042908544    0.42959071631
  0.24216276510    0.43497228232
  1 d
  0.87909318337E-01 1.00000000000
  1 f
  0.37386000000    1.00000000000
*
ta def2-ecp
*
  ncore =      60          lmax =      3
#      coefficient  r^n      exponent
f
      12.0179609      2          2.0178811
s-f
      1345.8806470      2          14.5464077
      36.7668062      2          7.2732038
      -12.0179609      2          2.0178811
p-f
      378.4253015      2          9.9355653
      22.2930909      2          4.9677824
      -12.0179609      2          2.0178811
d-f
      104.8839557      2          6.3473769
      8.7558481      2          3.1736885
      -12.0179609      2          2.0178811
*
*
w def2-SVP
# w      (7s6p5d1f) / [6s3p2d1f]      {211111/411/41/1}
*
  2 s
  15.000000000      -0.53315505392
  12.000000000      1.0014141748
  1 s
  5.2610967725      1.00000000000
  1 s
  0.92785370307      1.00000000000
  1 s
  0.40334458241      1.00000000000
  1 s
  0.11585976646      1.00000000000
  1 s
  0.41800474073E-01 1.00000000000
  4 p
  7.2496570000      0.45857265530
  6.0848760000     -0.66720686321
  1.2523777812      0.52090351989

```

```

0.58569208922      0.51885687511
 1 p
0.24106964301      1.00000000000
 1 p
0.403000000000E-01  1.00000000000
 4 d
 4.0131231332      -0.63416491808E-01
 1.6237452450      0.18452733732
0.69187452392      0.44121676843
0.27865835325      0.43158409241
 1 d
0.10225296446      1.00000000000
 1 f
0.43199000000      1.00000000000
*
w def2-ecp
*
  ncore =      60      lmax =      3
#      coefficient      r^n      exponent
f
      14.1525795      2      2.2588885
s-f
1192.3958823      2      14.3228564
 32.5229332      2      7.1614281
 -14.1525795      2      2.2588885
p-f
 359.0319671      2      10.0216411
 24.0303802      2      5.0108204
 -14.1525795      2      2.2588885
d-f
 108.3013490      2      6.5979974
 10.9825283      2      3.2989987
 -14.1525795      2      2.2588885
*
*
re def2-SVP
# re      (7s6p5d1f) / [6s3p2d1f]      {211111/411/41/1}
*
 2 s
14.781862000      -1.1395193885
12.324075000      1.9371421121
 1 s
 5.5098597284      1.00000000000
 1 s
0.98874104687      1.00000000000
 1 s
0.42833312030      1.00000000000
 1 s
0.12296804533      1.00000000000
 1 s
0.43949851581E-01  1.00000000000
 4 p
 7.4040050000      0.54510937865
 6.3502060000      -0.76096056536
 1.3311713455      0.53252276765
0.62659600547      0.51483045040
 1 p
0.25922718696      1.00000000000
 1 p
0.483000000000E-01  1.00000000000

```

```

4 d
4.0616274916      -0.76667295205E-01
1.8487943286      0.18067495215
0.78702048429     0.45160766937
0.32069843172     0.43261236266
1 d
0.11892742980     1.00000000000
1 f
0.48989000000     1.00000000000
*
re def2-ecp
*
ncore =      60      lmax =      3
#      coefficient  r^n      exponent
f
      16.4498523    2      2.5086506
s-f
      1038.9515723  2      14.0993051
      29.5617383   2      7.0496525
      -16.4498523  2      2.5086506
p-f
      339.5435096   2      10.1077169
      24.9136965   2      5.0538583
      -16.4498523  2      2.5086506
d-f
      111.6996527   2      6.8486179
      12.6243293   2      3.4243090
      -16.4498523  2      2.5086506
*
*
os def2-SVP
# os      (7s6p5d1f) / [6s3p2d1f]      {211111/411/41/1}
*
2 s
15.286736000      -1.0647114485
12.700638000      1.8433193269
1 s
5.7094832504      1.00000000000
1 s
1.0689228744      1.00000000000
1 s
0.46783543749     1.00000000000
1 s
0.13253456992     1.00000000000
1 s
0.47101982911E-01 1.00000000000
4 p
7.9362790000      0.33899369659
6.3036410000      -0.56379438345
1.4351579676      0.52360040577
0.68442749722     0.52445339821
1 p
0.28347394974     1.00000000000
1 p
0.58100000000E-01 1.00000000000
4 d
3.5808150000      -0.42773932262
3.1961650000      0.44501403992
1.0550226354      0.43689459722
0.41588406618     0.48220605799

```

```

1 d
0.14653507868      1.0000000000
1 f
0.55065000000     1.0000000000
*
os def2-ecp
*
ncore =      60      lmax =      3
# coefficient  r^n      exponent
f
      18.9094570      2      2.7670751
s-f
      885.4057191      2      13.8757539
      25.9670401      2      6.9378769
      -18.9094570      2      2.7670751
p-f
      320.0839019      2      10.1937926
      26.1487649      2      5.0968962
      -18.9094570      2      2.7670751
d-f
      115.0448431      2      7.0992385
      13.6225746      2      3.5496192
      -18.9094570      2      2.7670751
*
*
ir def2-SVP
# ir      (7s6p5d1f) / [6s3p2d1f]      {211111/411/41/1}
*
2 s
15.293709000      -1.6731899791
13.573682000      2.3934378976
1 s
5.8213436542      1.0000000000
1 s
1.1520364268      1.0000000000
1 s
0.51104895338      1.0000000000
1 s
0.14084043578      1.0000000000
1 s
0.49828673085E-01  1.0000000000
4 p
8.6697960000      0.21469187346
6.2456140000      -0.44863071815
1.5657036153      0.50653393257
0.75577412863      0.54052273352
1 p
0.31306011113      1.0000000000
1 p
0.54800000000E-01  1.0000000000
4 d
3.6994850000      -0.54840155965
3.3617430000      0.56835425804
1.1177053710      0.44304381513
0.44322534858      0.47078394930
1 d
0.15641305125      1.0000000000
1 f
0.61008000000      1.0000000000
*

```



```

ir def2-ecp
*
  ncore =    60          lmax =    3
#   coefficient      r^n      exponent
f
      21.5310311      2          3.0340719
s-f
      732.2691998      2          13.6522026
      26.4847209      2          6.8261013
      -21.5310311      2          3.0340719
p-f
      299.4894736      2          10.2798684
      26.4662335      2          5.1399341
      -21.5310311      2          3.0340719
d-f
      124.4575945      2          7.3498590
      14.0359952      2          3.6749295
      -21.5310311      2          3.0340719
*
*
pt def2-SVP
# pt      (7s6p5d1f) / [6s3p2d1f]      {211111/411/41/1}
*
  2 s
  16.559563000      -0.53808800717
  13.892440000      0.91402161377
  1 s
  5.8531044732      1.00000000000
  1 s
  1.2498640609      1.00000000000
  1 s
  0.55606439459      1.00000000000
  1 s
  0.13793093812      1.00000000000
  1 s
  0.48989034059E-01  1.00000000000
  4 p
  8.1000000000      0.72955608128
  7.2000000000      -0.95441807252
  1.5588402917      0.57140490320
  0.73230402180      0.49508234268
  1 p
  0.30270484669      1.00000000000
  1 p
  0.50000000000E-01  1.00000000000
  4 d
  4.6299536825      -0.87774450596E-01
  2.1980241252      0.21158360681
  0.93629991261      0.46533857641
  0.37160028160      0.41129165525
  1 d
  0.13155928617      1.00000000000
  1 f
  0.66813000000      1.00000000000
*
pt def2-ecp
*
  ncore =    60          lmax =    3
#   coefficient      r^n      exponent
f

```

|     |                   |                         |                   |
|-----|-------------------|-------------------------|-------------------|
|     | 24.3143757        | 2                       | 3.3095686         |
| s-f | 579.2238609       | 2                       | 13.4286513        |
|     | 29.6694906        | 2                       | 6.7143256         |
|     | -24.3143757       | 2                       | 3.3095686         |
| p-f | 280.8607742       | 2                       | 10.3659442        |
|     | 26.7453820        | 2                       | 5.1829721         |
|     | -24.3143757       | 2                       | 3.3095686         |
| d-f | 120.3964443       | 2                       | 7.6004795         |
|     | 15.8109206        | 2                       | 3.8002397         |
|     | -24.3143757       | 2                       | 3.3095686         |
| *   |                   |                         |                   |
| *   |                   |                         |                   |
| au  | def2-SVP          |                         |                   |
| #   | au                | (7s6p5d1f) / [6s3p2d1f] | {211111/411/41/1} |
| *   |                   |                         |                   |
|     | 2 s               |                         |                   |
|     | 20.115299000      | -0.15910719389          |                   |
|     | 12.193477000      | 0.79105526778           |                   |
|     | 1 s               |                         |                   |
|     | 6.0735294368      | 1.0000000000            |                   |
|     | 1 s               |                         |                   |
|     | 1.3174451569      | 1.0000000000            |                   |
|     | 1 s               |                         |                   |
|     | 0.58596768244     | 1.0000000000            |                   |
|     | 1 s               |                         |                   |
|     | 0.13875427354     | 1.0000000000            |                   |
|     | 1 s               |                         |                   |
|     | 0.48876985527E-01 | 1.0000000000            |                   |
|     | 4 p               |                         |                   |
|     | 8.6096650000      | 0.50053018599           |                   |
|     | 7.3353260000      | -0.72681584494          |                   |
|     | 1.6575296365      | 0.57315511417           |                   |
|     | 0.78159310216     | 0.49579068859           |                   |
|     | 1 p               |                         |                   |
|     | 0.32384840661     | 1.0000000000            |                   |
|     | 1 p               |                         |                   |
|     | 0.54000000000E-01 | 1.0000000000            |                   |
|     | 4 d               |                         |                   |
|     | 4.1439490000      | -0.37099566643          |                   |
|     | 3.5682570000      | 0.40197233762           |                   |
|     | 1.2345757130      | 0.46001988624           |                   |
|     | 0.48190232338     | 0.46152130958           |                   |
|     | 1 d               |                         |                   |
|     | 0.16490636769     | 1.0000000000            |                   |
|     | 1 f               |                         |                   |
|     | 0.72482000000     | 1.0000000000            |                   |
| *   |                   |                         |                   |
| au  | def2-ecp          |                         |                   |
| *   |                   |                         |                   |
|     | ncore =           | 60                      | lmax = 3          |
| #   | coefficient       | r^n                     | exponent          |
| f   |                   |                         |                   |
|     | 30.4900889        | 2                       | 4.7898200         |
|     | 5.1710738         | 2                       | 2.3949100         |
| s-f | 426.8466792       | 2                       | 13.2051000        |
|     | 37.0070829        | 2                       | 6.6025500         |

```

-30.4900889    2    4.7898200
-5.1710738    2    2.3949100
p-f
261.1995804    2    10.4520200
26.9624960    2    5.2260100
-30.4900889    2    4.7898200
-5.1710738    2    2.3949100
d-f
124.7906656    2    7.8511000
16.3007257    2    3.9255500
-30.4900889    2    4.7898200
-5.1710738    2    2.3949100
*
*
hg def2-SVP
# hg      (7s6p5d1f) / [6s3p2d1f]      {211111/411/41/1}
*
  2 s
26.842049000   -0.26845096483E-01
10.320909000   0.81771278143
  1 s
6.3656242291   1.0000000000
  1 s
1.3898932095   1.0000000000
  1 s
0.63706742699   1.0000000000
  1 s
0.16047725098   1.0000000000
  1 s
0.56410423453E-01 1.0000000000
  4 p
9.7729900000    0.21210940502
7.1690950000   -0.44026342153
1.7559567931    0.58406314464
0.83145670425    0.49359746203
  1 p
0.34494917659   1.0000000000
  1 p
0.70000000000E-01 1.0000000000
  4 d
4.2800000000   -0.32033414305
3.4800000000    0.37748470203
1.2535869926    0.48342275878
0.50841366863    0.43493523158
  1 d
0.18501599388   1.0000000000
  1 f
0.79569000000   1.0000000000
*
hg def2-ecp
*
ncore =      60      lmax =      3
#      coefficient  r^n      exponent
f
30.3649964    2      3.8857911
s-f
275.7372117   2      12.9815487
49.0892125    2      6.4907744
-30.3649964   2      3.8857911
p-f

```

```

                241.5400740    2           10.5380958
                27.3965908    2           5.2690479
                -30.3649964    2           3.8857911
d-f
                127.8670076    2           8.1017205
                16.6083115    2           4.0508603
                -30.3649964    2           3.8857911
*
*
t1 def2-SVP
# t1      (10s7p6d) / [4s4p2d]      {6211/4111/51}
*
    6 s
    45.356924655      0.50938157397E-02
    20.278843336      -0.14805704314
    14.420612394      0.36768453564
    6.2161909754      -0.66820394623
    1.5002511178      0.96232806743
    0.76330879305      0.33175999361
    2 s
    7.8193195283      -0.18828631537E-01
    1.3176904042      0.32093431467
    1 s
    0.17643545481      1.0000000000
    1 s
    0.65296835238E-01  1.0000000000
    4 p
    9.0323058024      0.22738839085
    7.5356419671      -0.35117975889
    1.0521421998      0.25690085604
    0.50303932656      0.84549942764E-01
    1 p
    2.0067660913      1.0000000000
    1 p
    0.16675605056      1.0000000000
    1 p
    0.48596401464E-01  1.0000000000
    5 d
    9.4421940760      0.58250776986E-01
    7.4410003381      -0.11789199301
    1.9831617772      0.34232057636
    0.91671748567      0.47557282350
    0.39647207885      0.30528029435
    1 d
    0.15500000000      1.0000000000
*
t1 def2-ecp
*
    ncore =    60          lmax =    3
#      coefficient      r^n          exponent
f
    15.8254880      2          5.6263990
    21.1040210      2          5.5489520
    2.9151270      2          2.8749460
    3.8969030      2          2.8214510
s-f
    281.2846630      2          12.1678050
    62.4342510      2          8.2949090
    -15.8254880      2          5.6263990
    -21.1040210      2          5.5489520

```

|     |             |   |           |
|-----|-------------|---|-----------|
|     | -2.9151270  | 2 | 2.8749460 |
|     | -3.8969030  | 2 | 2.8214510 |
| p-f |             |   |           |
|     | 4.6334080   | 2 | 7.1514920 |
|     | 9.3417560   | 2 | 5.1728650 |
|     | 72.2992530  | 2 | 9.8910720 |
|     | 144.5580370 | 2 | 9.0033910 |
|     | -15.8254880 | 2 | 5.6263990 |
|     | -21.1040210 | 2 | 5.5489520 |
|     | -2.9151270  | 2 | 2.8749460 |
|     | -3.8969030  | 2 | 2.8214510 |
| d-f |             |   |           |
|     | 35.9430390  | 2 | 7.1302180 |
|     | 53.9095930  | 2 | 6.9269060 |
|     | 10.3819390  | 2 | 5.4175700 |
|     | 15.5838220  | 2 | 5.1386810 |
|     | -15.8254880 | 2 | 5.6263990 |
|     | -21.1040210 | 2 | 5.5489520 |
|     | -2.9151270  | 2 | 2.8749460 |
|     | -3.8969030  | 2 | 2.8214510 |

\*

\*

pb def2-SVP

# pb (10s7p6d) / [4s4p2d] {6211/4111/51}

\*

|                   |                    |  |
|-------------------|--------------------|--|
| 6 s               |                    |  |
| 55.727520333      | 0.29681153058E-02  |  |
| 20.302912827      | -0.14352634362     |  |
| 14.558628750      | 0.37554188507      |  |
| 6.5370530973      | -0.67253099800     |  |
| 1.5933900686      | 0.95887533909      |  |
| 0.83051419711     | 0.32593632538      |  |
| 2 s               |                    |  |
| 8.0719473648      | -0.20412061217E-01 |  |
| 1.4165737490      | 0.32865829049      |  |
| 1 s               |                    |  |
| 0.20418933370     | 1.0000000000       |  |
| 1 s               |                    |  |
| 0.77159007761E-01 | 1.0000000000       |  |
| 4 p               |                    |  |
| 9.5531412199      | 0.20542943990      |  |
| 7.5327685129      | -0.36407590058     |  |
| 1.1185539567      | 0.32217481686      |  |
| 0.53739855255     | 0.96677743015E-01  |  |
| 1 p               |                    |  |
| 2.1359869828      | 1.0000000000       |  |
| 1 p               |                    |  |
| 0.20027494801     | 1.0000000000       |  |
| 1 p               |                    |  |
| 0.63408011513E-01 | 1.0000000000       |  |
| 5 d               |                    |  |
| 13.494505735      | 0.11571042371E-01  |  |
| 7.0609770411      | -0.66746645076E-01 |  |
| 2.1581835375      | 0.33978760942      |  |
| 1.0148541418      | 0.48523039273      |  |
| 0.44632672920     | 0.29682924018      |  |
| 1 d               |                    |  |
| 0.17500000000     | 1.0000000000       |  |

\*

pb def2-ecp

```

*
ncore = 60          lmax = 3
# coefficient      r^n      exponent
f
    12.2098920     2        3.8875120
    16.1902910     2        3.8119630
s-f
    281.2854990    2        12.2963030
    62.5202170     2        8.6326340
    -12.2098920    2        3.8875120
    -16.1902910    2        3.8119630
p-f
    72.2768970     2        10.2417900
    144.5910830    2        8.9241760
    4.7586930      2        6.5813420
    9.9406210      2        6.2554030
    -12.2098920    2        3.8875120
    -16.1902910    2        3.8119630
d-f
    35.8485070     2        7.7543360
    53.7243420     2        7.7202810
    10.1152560     2        4.9702640
    14.8337310     2        4.5637890
    -12.2098920    2        3.8875120
    -16.1902910    2        3.8119630
*
*
bi def2-SVP
# bi      (10s7p6d) / [4s4p2d]      {6211/4111/51}
*
  6 s
  175.19632102      0.80278879028E-03
  19.820147783      -0.14624461250
  14.960110102      0.37435719885
  6.7065785571      -0.68476017748
  1.7391967524      0.90967322081
  0.94504730591     0.38695797807
  2 s
  8.4636832909      -0.20037183144E-01
  1.5317838545      0.31054408682
  1 s
  0.23405391503     1.0000000000
  1 s
  0.90268814613E-01 1.0000000000
  4 p
  10.672046293      0.14391258793
  7.1992185915      -0.37994608603
  1.5359697528      0.53268032065
  0.72201275727     0.23037698678
  1 p
  2.8508661858      1.0000000000
  1 p
  0.23769418731     1.0000000000
  1 p
  0.78768140453E-01 1.0000000000
  5 d
  15.834273510      0.85062993231E-02
  7.0956896087      -0.65954380016E-01
  2.3363137007      0.33707163406
  1.1208861366      0.49128719933

```

```

0.50309487376      0.29095930644
  1 d
0.20000000000      1.00000000000
*
bi def2-ecp
*
  ncore =      60          lmax =      3
#   coefficient      r^n          exponent
f
      13.7133830      2          4.2145460
      18.1943080      2          4.1334000
s-f
      283.2642270      2          13.0430900
      62.4719590      2          8.2216820
      -13.7133830      2          4.2145460
      -18.1943080      2          4.1334000
p-f
      72.0014990      2          10.4677770
      144.0022770      2          9.1189010
      5.0079450      2          6.7547910
      9.9915500      2          6.2525920
      -13.7133830      2          4.2145460
      -18.1943080      2          4.1334000
d-f
      36.3962590      2          8.0814740
      54.5976640      2          7.8905950
      9.9842940      2          4.9555560
      14.9814850      2          4.7045590
      -13.7133830      2          4.2145460
      -18.1943080      2          4.1334000
*
*
po def2-SVP
# po      (10s7p6d) / [4s4p2d]      {6211/4111/51}
*
  6 s
278.13783916      0.91690497839E-03
19.659291105      -0.14713009283
15.016229647      0.38790413631
7.1149978720      -0.67059966298
1.7879214122      0.91212928327
0.94021655206      0.29153755200
  2 s
8.7584161749      -0.21561417525E-01
1.6503945866      0.31638990001
  1 s
0.26329582133      1.00000000000
  1 s
0.10190654304      1.00000000000
  4 p
10.445945973      0.23631841405
8.0293101888      -0.45017818996
1.3588798023      0.44160334658
0.66829182929      0.14575285544
  1 p
2.4460635387      1.00000000000
  1 p
0.27242942777      1.00000000000
  1 p
0.88796031338E-01  1.00000000000

```

```

5 d
18.292670150      0.72030963652E-02
7.1695578539     -0.66160544754E-01
2.5029225180     0.343634449378
1.2115945443     0.50529101033
0.54713334240    0.28301155453
1 d
0.21500000000    1.00000000000
*
po def2-ecp
*
ncore = 60          lmax = 3
#      coefficient  r^n      exponent
f
      17.4282950    2         5.0132700
      23.3803530    2         4.9846400
      0.1633920     2         1.3267600
      0.3245660     2         1.5287580
s-f
      283.2447060    2         13.2772270
      62.3964610    2         8.3995180
      -17.4282950   2         5.0132700
      -23.3803530   2         4.9846400
      -0.1633920    2         1.3267600
      -0.3245660    2         1.5287580
p-f
      71.9917160     2         10.6656820
      143.9718710    2         9.2837530
      4.9496150      2         6.8727490
      9.7404990      2         6.3261500
      -17.4282950   2         5.0132700
      -23.3803530   2         4.9846400
      -0.1633920    2         1.3267600
      -0.3245660    2         1.5287580
d-f
      36.3783830     2         8.2148660
      54.5627150     2         8.0086960
      9.8894990      2         5.0552270
      14.6938770     2         4.7825530
      -17.4282950   2         5.0132700
      -23.3803530   2         4.9846400
      -0.1633920    2         1.3267600
      -0.3245660    2         1.5287580
*
*
at def2-SVP
# at      (10s7p6d) / [4s4p2d]      {6211/4111/51}
*
6 s
303.23376176     0.63504969788E-03
20.289449240     -0.13823165350
15.383783126     0.38333193283
7.4702184232     -0.66837560338
1.8731608346     0.91545877992
0.97426847543    0.25559567998
2 s
8.9610112498     -0.23092977605E-01
1.7804284294     0.31690635939
1 s
0.29269461143    1.00000000000

```



```

1 s
0.11395353119      1.0000000000
4 p
10.722023134      0.26194870008
8.4823338656     -0.46607228264
1.3474291294      0.42119853309
0.62824011467     0.10643224457
1 p
2.4814896839      1.0000000000
1 p
0.31036518470      1.0000000000
1 p
0.10144862043      1.0000000000
5 d
20.799819604      0.65227965381E-02
7.1664616770     -0.67780885217E-01
2.6934397048      0.33954991335
1.3175112423      0.50899559178
0.59997066293     0.27526771759
1 d
0.23500000000     1.0000000000
*
at def2-ecp
*
ncore =      60      lmax =      3
# coefficient  r^n      exponent
f
      19.8701980      2      5.8121630
      26.4164520      2      5.7537150
      0.9949700      2      2.5134720
      1.4907010      2      2.5362610
s-f
      49.9571580      2      30.2008320
      283.2103710      2      13.6123060
      62.2810520      2      8.5293400
      -19.8701980      2      5.8121630
      -26.4164520      2      5.7537150
      -0.9949700      2      2.5134720
      -1.4907010      2      2.5362610
p-f
      71.9823710      2      10.8540650
      143.9035320      2      9.4682290
      4.8717590      2      7.0311140
      8.9830590      2      6.1438580
      -19.8701980      2      5.8121630
      -26.4164520      2      5.7537150
      -0.9949700      2      2.5134720
      -1.4907010      2      2.5362610
d-f
      36.3632370      2      8.3135150
      54.5489700      2      7.9989650
      9.7762850      2      5.1799660
      14.2647550      2      4.9422260
      -19.8701980      2      5.8121630
      -26.4164520      2      5.7537150
      -0.9949700      2      2.5134720
      -1.4907010      2      2.5362610
*
*
rn def2-SVP

```

# rn (11s10p8d2f) / [6s5p3d2f] {521111/34111/611/11}

\*  
5 s  
5187.7442468 0.16097034848E-03  
768.14491207 0.10508214789E-02  
159.35182065 0.27375438093E-02  
21.863432724 -0.55045904905  
18.388689978 0.78321373922  
2 s  
24.816226448 -0.82636797204E-01  
7.2923301677 1.0926256000  
1 s  
2.0850437166 1.0000000000  
1 s  
1.0915245945 1.0000000000  
1 s  
0.34915708428 1.0000000000  
1 s  
0.13648422952 1.0000000000  
3 p  
194.68918723 0.26265814046E-03  
11.210013525 0.19952302621  
7.5298316489 -0.45994479561  
4 p  
9.0845000304 -0.23093917426  
6.2631489717 0.39747614192  
2.2545193734 0.83026693838  
1.1180666918 0.51467013112  
1 p  
0.47444492594 1.0000000000  
1 p  
0.20172354616 1.0000000000  
1 p  
0.79503144392E-01 1.0000000000  
6 d  
75.302723665 0.73590238429E-03  
17.965913830 0.89490827389E-02  
7.3741298033 -0.76641663693E-01  
3.2296258578 0.22975404602  
1.7937840508 0.43991495311  
0.94633319732 0.35259395198  
1 d  
0.46860482223 1.0000000000  
1 d  
0.20000000000 1.0000000000  
1 f  
0.41806000000 1.0000000000  
1 f  
2.1000000000 1.0000000000

\*  
rn def2-ecp  
\*

| # | ncore = 60  | lmax = 3 |           |
|---|-------------|----------|-----------|
| f | coefficient | r^n      | exponent  |
|   | 21.7972900  | 2        | 6.3485710 |
|   | 28.9468050  | 2        | 6.2959490 |
|   | 1.4473650   | 2        | 2.8821180 |
|   | 2.1779640   | 2        | 2.9080480 |

s-f

|     |             |   |            |
|-----|-------------|---|------------|
|     | 49.9655510  | 2 | 30.1512420 |
|     | 283.0700000 | 2 | 14.5212410 |
|     | 62.0028700  | 2 | 8.0520380  |
|     | -21.7972900 | 2 | 6.3485710  |
|     | -28.9468050 | 2 | 6.2959490  |
|     | -1.4473650  | 2 | 2.8821180  |
|     | -2.1779640  | 2 | 2.9080480  |
| p-f |             |   |            |
|     | 71.9691190  | 2 | 11.0099420 |
|     | 143.8605590 | 2 | 9.6176250  |
|     | 4.7147610   | 2 | 7.3360080  |
|     | 9.0130650   | 2 | 6.4062530  |
|     | -21.7972900 | 2 | 6.3485710  |
|     | -28.9468050 | 2 | 6.2959490  |
|     | -1.4473650  | 2 | 2.8821180  |
|     | -2.1779640  | 2 | 2.9080480  |
| d-f |             |   |            |
|     | 36.3683650  | 2 | 8.3692200  |
|     | 54.5517610  | 2 | 8.1169750  |
|     | 9.6344870   | 2 | 5.3536560  |
|     | 14.3879020  | 2 | 5.0972120  |
|     | -21.7972900 | 2 | 6.3485710  |
|     | -28.9468050 | 2 | 6.2959490  |
|     | -1.4473650  | 2 | 2.8821180  |
|     | -2.1779640  | 2 | 2.9080480  |

\*

=====  
def2-TZVP  
=====

\*

h def2-TZVP

# h (5s1p) / [3s1p] {311/1}

\*

|               |   |                   |  |
|---------------|---|-------------------|--|
| 3             | s |                   |  |
| 34.061341000  |   | 0.60251978000E-02 |  |
| 5.1235746000  |   | 0.45021094000E-01 |  |
| 1.1646626000  |   | 0.20189726000     |  |
| 1             | s |                   |  |
| 0.32723041000 |   | 1.00000000000     |  |
| 1             | s |                   |  |
| 0.10307241000 |   | 1.00000000000     |  |
| 1             | p |                   |  |
| 0.80000000000 |   | 1.00000000000     |  |

\*

\*

he def2-TZVP

# he (5s1p) / [3s1p] {311/1}

\*

|               |   |                   |  |
|---------------|---|-------------------|--|
| 3             | s |                   |  |
| 98.078321616  |   | 0.75803064967E-02 |  |
| 14.764404247  |   | 0.54848620937E-01 |  |
| 3.3185831473  |   | 0.22074382186     |  |
| 1             | s |                   |  |
| 0.87413869551 |   | 1.00000000000     |  |
| 1             | s |                   |  |
| 0.24459897208 |   | 1.00000000000     |  |
| 1             | p |                   |  |
| 1.00000000000 |   | 1.00000000000     |  |

\*

\*

```

li def2-TZVP
# li      (11s3p) / [5s3p]      {62111/111}
*
  6 s
6269.2628010      0.20540968826E-03
940.31612431     0.15916554089E-02
214.22107528     0.82869829707E-02
60.759840184     0.33856374249E-01
19.915152032     0.11103225876
7.3171509797     0.27449383329
  2 s
2.9724674216     0.23792456411
1.2639852314     0.30765411924
  1 s
0.51427489953    1.00000000000
  1 s
0.77030885901E-01 1.00000000000
  1 s
0.28938896433E-01 1.00000000000
  1 p
0.40000000000    1.00000000000
  1 p
0.60000000000E-01 1.00000000000
  1 p
3.32700000000    1.00000000000
*
*
be def2-TZVP
# be      (11s4p1d) / [5s3p1d]  {62111/121/1}
*
  6 s
4700.2365626     0.23584389316E-03
704.82845622     0.18243791019E-02
160.43110478     0.93966148224E-02
45.425347336     0.36908924159E-01
14.798334125     0.10897561281
5.3512452537     0.21694284551
  2 s
2.1542044819     0.44695408857
0.93363744400    0.20866985771
  1 s
0.18791432989    1.00000000000
  1 s
0.74648267947E-01 1.00000000000
  1 s
0.32650484598E-01 1.00000000000
  1 p
3.6316917145     -0.29033998305E-01
  2 p
0.71695694366    -0.16877854032
0.19541932860    -0.51403419628
  1 p
0.60515465890E-01 1.00000000000
  1 d
0.18000000000    0.00000000000
*
*
b def2-TZVP
# b      (11s6p2d1f) / [5s3p2d1f]  {62111/411/11/1}
*

```

```

6 s
8564.8660687      0.22837198155E-03
1284.1516263     0.17682576447E-02
292.27871604     0.91407080516E-02
82.775469176     0.36342638989E-01
27.017939269     0.11063458441
9.8149619660     0.23367344321
2 s
3.9318559059     0.41818777978
1.6595599712     0.22325473798
1 s
0.35762965239    1.00000000000
1 s
0.14246277496    1.00000000000
1 s
0.60560594768E-01 1.00000000000
4 p
22.453875803     0.50265575179E-02
5.1045058330     0.32801738965E-01
1.4986081344     0.13151230768
0.50927831315    0.33197167769
1 p
0.18147077798    0.47314319570
1 p
0.64621893904E-01 0.25802783943
1 d
0.66100000000    1.00000000000
1 d
0.19900000000    1.00000000000
1 f
0.49000000000    1.00000000000
*
*
c def2-TZVP
# c      (11s6p2d1f) / [5s3p2d1f]      {62111/411/11/1}
*
6 s
13575.349682     0.22245814352E-03
2035.2333680     0.17232738252E-02
463.22562359     0.89255715314E-02
131.20019598     0.35727984502E-01
42.853015891     0.11076259931
15.584185766     0.24295627626
2 s
6.2067138508     0.41440263448
2.5764896527     0.23744968655
1 s
0.57696339419    1.00000000000
1 s
0.22972831358    1.00000000000
1 s
0.95164440028E-01 1.00000000000
4 p
34.697232244     0.53333657805E-02
7.9582622826     0.35864109092E-01
2.3780826883     0.14215873329
0.81433208183    0.34270471845
1 p
0.28887547253    0.46445822433
1 p

```

```

0.10056823671      0.24955789874
  1 d
1.0970000000      1.0000000000
  1 d
0.3180000000      1.0000000000
  1 f
0.7610000000      1.0000000000
*
*
n def2-TZVP
# n      (11s6p2d1f) / [5s3p2d1f]      {62111/411/11/1}
*
  6 s
19730.800647      0.21887984991E-03
2957.8958745      0.16960708803E-02
673.22133595      0.87954603538E-02
190.68249494      0.35359382605E-01
62.295441898      0.11095789217
22.654161182      0.24982972552
  2 s
  8.9791477428      0.40623896148
  3.6863002370      0.24338217176
  1 s
0.84660076805      1.0000000000
  1 s
0.33647133771      1.0000000000
  1 s
0.13647653675      1.0000000000
  4 p
  49.200380510      0.55552416751E-02
  11.346790537      0.38052379723E-01
  3.4273972411      0.14953671029
  1.1785525134      0.34949305230
  1 p
0.41642204972      0.45843153697
  1 p
0.14260826011      0.24428771672
  1 d
  1.6540000000      1.0000000000
  1 d
0.46900000000      1.0000000000
  1 f
  1.0930000000      1.0000000000
*
*
o def2-TZVP
# o      (11s6p2d1f) / [5s3p2d1f]      {62111/411/11/1}
*
  6 s
27032.382631      0.21726302465E-03
4052.3871392      0.16838662199E-02
922.32722710      0.87395616265E-02
261.24070989      0.35239968808E-01
85.354641351      0.11153519115
31.035035245      0.25588953961
  2 s
  12.260860728      0.39768730901
  4.9987076005      0.24627849430
  1 s
  1.1703108158      1.0000000000

```

```

1 s
0.46474740994      1.0000000000
1 s
0.18504536357      1.0000000000
4 p
63.274954801       0.60685103418E-02
14.627049379       0.41912575824E-01
4.4501223456       0.16153841088
1.5275799647       0.35706951311
1 p
0.52935117943      0.44794207502
1 p
0.17478421270      0.24446069663
1 d
2.3140000000       1.0000000000
1 d
0.64500000000     1.0000000000
1 f
1.4280000000       1.0000000000
*
*
f def2-TZVP
# f      (11s6p2d1f) / [5s3p2d1f]      {62111/411/11/1}
*
6 s
35479.100441       0.21545014888E-03
5318.4728983       0.16700686527E-02
1210.4810975       0.86733211476E-02
342.85518140       0.35049933175E-01
112.01943181       0.11165320133
40.714740248       0.25988506647
2 s
16.039678111       0.39422966880
6.5038186740       0.24998238551
1 s
1.5440477509       1.0000000000
1 s
0.61223452862      1.0000000000
1 s
0.24027979698      1.0000000000
4 p
80.233900483       0.63685999134E-02
18.594010743       0.44303143530E-01
5.6867902653       0.16867248708
1.9511006294       0.36166346255
1 p
0.66970211298      0.44202901491
1 p
0.21651300410      0.24319875730
1 d
3.1070000000       1.0000000000
1 d
0.85500000000     1.0000000000
1 f
1.9170000000       1.0000000000
*
*
ne def2-TZVP
# ne     (11s6p2d1f) / [5s3p2d1f]     {62111/411/11/1}
*

```

```

6 s
45069.464022      0.21687155182E-03
6755.9768656     0.16812736757E-02
1537.6502864     0.87356062782E-02
435.51697667    0.35361266922E-01
142.28655638    0.11321521454
51.692153804    0.26654653104
 2 s
20.315870490    0.39631959951
8.2021942646    0.25582811251
 1 s
1.9681276278    1.0000000000
 1 s
0.77904756001   1.0000000000
 1 s
0.30229502043   1.0000000000
 4 p
99.782996032    0.65569234163E-02
23.176124101    0.45888009138E-01
7.1163945872    0.17331287812
2.4418711435    0.36475267512
 1 p
0.83389605766   0.43831075171
 1 p
0.26607311301   0.24160029835
 1 d
4.0140000000    1.0000000000
 1 d
1.0960000000    1.0000000000
 1 f
2.5440000000    1.0000000000
*
*
na def2-TZVP
# na      (14s8p3d) / [5s4p3d]      {73211/5111/111}
*
 7 s
26041.109927    0.61806342811E-03
3906.1268548    0.47748604414E-02
888.97454993    0.24471684829E-01
251.45497961    0.94755394977E-01
81.650143512    0.26867496920
28.904158401    0.47925475440
10.625782932    0.33248591469
 3 s
53.769410179    0.19527731872E-01
16.308243025    0.92648010794E-01
2.3730384125    -0.39938670172
 2 s
0.95730772603    1.6428595391
0.40806460959    0.55692596966
 1 s
0.49967582329E-01  1.0000000000
 1 s
0.19268616250E-01  1.0000000000
 5 p
138.07979989    0.57951891929E-02
32.232700393    0.41620846251E-01
9.9816075360    0.16281916885
3.4822033928    0.36011784647

```



|                   |               |
|-------------------|---------------|
| 1.2299134620      | 0.44858979889 |
| 1 p               |               |
| 0.41743959423     | 0.23040759559 |
| 1 p               |               |
| 0.30000000000E-01 | 1.0000000000  |
| 1 p               |               |
| 0.91000000000E-01 | 1.0000000000  |
| 1 d               |               |
| 2.6090000000      | 1.0000000000  |
| 1 d               |               |
| 0.4300000000      | 0.0000000000  |
| 1 d               |               |
| 0.1000000000      | 0.0000000000  |

\*  
\*  
mg def2-TZVP  
# mg (14s8p3d) / [5s4p3d] {73211/5111/111}  
\*

|                   |                   |
|-------------------|-------------------|
| 7 s               |                   |
| 31438.349555      | 0.60912311326E-03 |
| 4715.5153354      | 0.47066196465E-02 |
| 1073.1629247      | 0.24135820657E-01 |
| 303.57238768      | 0.93628959834E-01 |
| 98.626251042      | 0.26646742093     |
| 34.943808417      | 0.47890929917     |
| 12.859785199      | 0.33698490286     |
| 3 s               |                   |
| 64.876913004      | 0.19180889307E-01 |
| 19.725520777      | 0.90913704392E-01 |
| 2.8951804339      | -0.39563756125    |
| 2 s               |                   |
| 1.1960454710      | 1.6827603373      |
| 0.54329451156     | 0.52141091954     |
| 1 s               |                   |
| 0.10099104092     | 1.0000000000      |
| 1 s               |                   |
| 0.36865728085E-01 | 1.0000000000      |
| 5 p               |                   |
| 179.87189612      | 0.53799549018E-02 |
| 42.120069376      | 0.39318014098E-01 |
| 13.120503032      | 0.15740129476     |
| 4.6257503609      | 0.35919094128     |
| 1.6695211016      | 0.45533379310     |
| 1 p               |                   |
| 0.58551012105     | 0.21986432910     |
| 1 p               |                   |
| 0.18914796195     | 1.0000000000      |
| 1 p               |                   |
| 0.53768755187E-01 | 1.0000000000      |
| 1 d               |                   |
| 3.4440000000      | 1.0000000000      |
| 1 d               |                   |
| 0.2900000000      | 1.0000000000      |
| 1 d               |                   |
| 0.70000000000E-01 | 1.0000000000      |

\*  
\*  
al def2-TZVP  
# al (14s9p3d1f) / [5s5p2d1f] {73211/51111/21/1}  
\*

```

7 s
37792.550772      0.57047888709E-03
5668.0682165     0.44093016538E-02
1289.8582841     0.22630967411E-01
364.86596028     0.88025644295E-01
118.57631515     0.25223701612
42.024867605     0.45960547169
15.499501629     0.33277886014
3 s
75.208026598     0.19250560190E-01
23.031408972     0.87906743952E-01
3.6348797649     -0.34246704535
2 s
1.6065049957     1.5106266058
0.76103394581    0.58071016470
1 s
0.16556708849    1.0000000000
1 s
0.60041577113E-01 1.0000000000
5 p
452.52303192     0.23110812466E-02
107.08195049     0.18568641823E-01
34.131021255     0.87216237035E-01
12.587037428     0.26902101523
4.9811919704     0.52128324272
1 p
2.0070350900     0.60271687494
1 p
0.80083714374    1.0000000000
1 p
0.20178927472    1.0000000000
1 p
0.57895550392E-01 1.0000000000
2 d
1.5700000000     0.20000000000
0.3330000000     1.0000000000
1 d
0.1110000000     1.0000000000
1 f
0.2440000000     1.0000000000
*
*
si def2-TZVP
# si      (14s9p3d1f) / [5s5p2d1f]      {73211/51111/21/1}
*
7 s
44773.358078     0.55914765868E-03
6717.1992104     0.43206040189E-02
1528.8960325     0.22187096460E-01
432.54746585     0.86489249116E-01
140.61505226     0.24939889716
49.857636724     0.46017197366
18.434974885     0.34250236575
3 s
86.533886111     0.21300063007E-01
26.624606846     0.94676139318E-01
4.4953057159     -0.32616264859
2 s
2.1035045710     1.3980803850
1.0106094922     0.63865786699

```

|                                                 |                   |
|-------------------------------------------------|-------------------|
| 1 s                                             |                   |
| 0.23701751489                                   | 1.0000000000      |
| 1 s                                             |                   |
| 0.85703405362E-01                               | 1.0000000000      |
| 5 p                                             |                   |
| 394.47503628                                    | 0.26285693959E-02 |
| 93.137683104                                    | 0.20556257749E-01 |
| 29.519608742                                    | 0.92070262801E-01 |
| 10.781663791                                    | 0.25565889739     |
| 4.1626574778                                    | 0.42111707185     |
| 1 p                                             |                   |
| 1.6247972989                                    | 0.34401746318     |
| 1 p                                             |                   |
| 0.54306660493                                   | 1.0000000000      |
| 1 p                                             |                   |
| 0.20582073956                                   | 1.0000000000      |
| 1 p                                             |                   |
| 0.70053487306E-01                               | 1.0000000000      |
| 2 d                                             |                   |
| 2.3030000000                                    | 0.2000000000      |
| 0.4760000000                                    | 1.0000000000      |
| 1 d                                             |                   |
| 0.1600000000                                    | 1.0000000000      |
| 1 f                                             |                   |
| 0.3360000000                                    | 1.0000000000      |
| *                                               |                   |
| *                                               |                   |
| p def2-TZVP                                     |                   |
| # p (14s9p3d1f) / [5s5p2d1f] {73211/51111/21/1} |                   |
| *                                               |                   |
| 7 s                                             |                   |
| 52426.999233                                    | 0.55207164100E-03 |
| 7863.2660552                                    | 0.42678595308E-02 |
| 1789.5227333                                    | 0.21931529186E-01 |
| 506.27300165                                    | 0.85667168373E-01 |
| 164.60698546                                    | 0.24840686605     |
| 58.391918722                                    | 0.46336753971     |
| 21.643663201                                    | 0.35350558156     |
| 3 s                                             |                   |
| 99.013837620                                    | 0.21895679958E-01 |
| 30.550439817                                    | 0.95650470295E-01 |
| 5.4537087661                                    | -0.29454270186    |
| 2 s                                             |                   |
| 2.6503362563                                    | 1.3294381200      |
| 1.2726688867                                    | 0.66109396473     |
| 1 s                                             |                   |
| 0.31645005203                                   | 1.0000000000      |
| 1 s                                             |                   |
| 0.11417466938                                   | 1.0000000000      |
| 5 p                                             |                   |
| 472.27219248                                    | 0.25710623052E-02 |
| 111.58882756                                    | 0.20250297999E-01 |
| 35.445936418                                    | 0.91580716787E-01 |
| 12.990776875                                    | 0.25749454014     |
| 5.0486221658                                    | 0.42862899758     |
| 1 p                                             |                   |
| 1.9934049566                                    | 0.34359817849     |
| 1 p                                             |                   |
| 0.66527284430                                   | 1.0000000000      |
| 1 p                                             |                   |

```

0.25516832128      1.0000000000
  1 p
0.90357762251E-01  1.0000000000
  2 d
  3.1200000000      0.2000000000
0.648000000000     1.0000000000
  1 d
0.218000000000     1.0000000000
  1 f
0.452000000000     1.0000000000
*
*
s def2-TZVP
# s      (14s9p3d1f) / [5s5p2d1f]      {73211/51111/21/1}
*
  7 s
  60700.928104      0.54695944225E-03
  9102.6106854      0.42297224557E-02
  2071.4166009      0.21747824159E-01
  586.02476821      0.85100053589E-01
  190.55395021      0.24799128459
  67.630384260      0.46703640406
  25.127306905      0.36434587550
  3 s
  112.57463010      0.21670040240E-01
  34.795554217      0.93602301760E-01
  6.5115556215      -0.26068001422
  2 s
  3.2399032261      1.2842089435
  1.5477160881      0.66036416584
  1 s
0.40541030112      1.0000000000
  1 s
0.14550651059      1.0000000000
  5 p
  564.36716027      0.24796796317E-02
  133.42624379      0.19677930250E-01
  42.468271189      0.89980008258E-01
  15.616527580      0.25705880575
  6.1093988469      0.43515167292
  1 p
  2.4404160198      0.34883240595
  1 p
0.83882201296      1.0000000000
  1 p
0.31288746900      1.0000000000
  1 p
0.10770109004      1.0000000000
  2 d
  3.7560000000      0.2000000000
0.812000000000     1.0000000000
  1 d
0.273000000000     1.0000000000
  1 f
0.557000000000     1.0000000000
*
*
cl def2-TZVP
# cl      (14s9p3d1f) / [5s5p2d1f]      {73211/51111/21/1}
*

```

```

7 s
69507.990945      0.54314897497E-03
10426.156880     0.41990463961E-02
2373.2334061     0.21592141679E-01
671.56420071     0.84598850094E-01
218.41999790     0.24757249724
77.572249714     0.47016930228
28.888815277     0.37436370716
3 s
127.10527185     0.25182166603E-01
39.339582961     0.10786112456
7.6740679989    -0.27408821574
2 s
3.8745627630     1.3213875014
1.8385832573     0.68636955368
1 s
0.50229057542     1.0000000000
1 s
0.17962723420     1.0000000000
5 p
666.50423284     0.23632663836E-02
157.64241690     0.18879300374E-01
50.262520978     0.87206341273E-01
18.536078105     0.25285612970
7.2940532777     0.43507154820
1 p
2.9433248995     0.35026513165
1 p
1.0404970818     1.0000000000
1 p
0.38456415080     1.0000000000
1 p
0.13069642732     1.0000000000
2 d
4.6100000000     0.20000000000
1.0110000000     1.0000000000
1 d
0.33900000000     1.0000000000
1 f
0.70600000000     1.0000000000
*
*
ar def2-TZVP
# ar      (14s9p3d1f) / [5s5p2d1f]      {73211/51111/21/1}
*
7 s
79111.422998     0.51029325002E-03
11864.746009     0.39463036981E-02
2700.1642973     0.20307073910E-01
763.95943485     0.79691825214E-01
248.45150561     0.23420623836
88.283581000     0.44833849481
32.948607069     0.36408167400
3 s
142.55358000     0.26387407001E-01
44.163688009     0.11226433999
8.9524995000    -0.26178922001
2 s
4.5546920941     1.3002484998
2.1444079001     0.67197237009

```

|                                             |                    |
|---------------------------------------------|--------------------|
| 1 s                                         |                    |
| 0.60708777004                               | 1.0000000000       |
| 1 s                                         |                    |
| 0.21651431999                               | 1.0000000000       |
| 5 p                                         |                    |
| 776.77541998                                | 0.22028005003E-02  |
| 183.80107018                                | 0.17694180008E-01  |
| 58.694003175                                | 0.82431293717E-01  |
| 21.701591695                                | 0.24207278863      |
| 8.5821489635                                | 0.42263558251      |
| 1 p                                         |                    |
| 3.4922679161                                | 0.34151806086      |
| 1 p                                         |                    |
| 1.2637426998                                | 1.0000000000       |
| 1 p                                         |                    |
| 0.46607870005                               | 1.0000000000       |
| 1 p                                         |                    |
| 0.15766003000                               | 1.0000000000       |
| 2 d                                         |                    |
| 5.5510000000                                | 0.20000000000      |
| 1.2350000000                                | 1.0000000000       |
| 1 d                                         |                    |
| 0.41200000000                               | 1.0000000000       |
| 1 f                                         |                    |
| 0.89000000000                               | 1.0000000000       |
| *                                           |                    |
| *                                           |                    |
| k def2-TZVP                                 |                    |
| # k (17s11p3d) / [6s4p3d] {842111/6311/111} |                    |
| *                                           |                    |
| 8 s                                         |                    |
| 153976.18325                                | 0.23662636107E-03  |
| 23082.497672                                | 0.18342929137E-02  |
| 5253.2344745                                | 0.95310527769E-02  |
| 1486.9550133                                | 0.38638406980E-01  |
| 484.06333726                                | 0.12480768502      |
| 173.56653980                                | 0.29278861009      |
| 67.116381464                                | 0.40633425860      |
| 26.339502054                                | 0.20077215860      |
| 4 s                                         |                    |
| 172.87693567                                | -0.24200960936E-01 |
| 53.058649063                                | -0.11553095040     |
| 7.9212753964                                | 0.57455545175      |
| 3.2108880472                                | 0.57023185107      |
| 2 s                                         |                    |
| 4.5662070895                                | -0.22615763466     |
| 0.70209907282                               | 0.75528392045      |
| 1 s                                         |                    |
| 0.28258942635                               | 1.0000000000       |
| 1 s                                         |                    |
| 0.35805824617E-01                           | 1.0000000000       |
| 1 s                                         |                    |
| 0.15819213245E-01                           | 1.0000000000       |
| 6 p                                         |                    |
| 728.18449873                                | 0.26150689792E-02  |
| 172.13265061                                | 0.20673630835E-01  |
| 54.829847075                                | 0.93205603870E-01  |
| 20.166266494                                | 0.25436518210      |
| 7.8610728806                                | 0.39131132810      |
| 3.1105213132                                | 0.22481345943      |

```

3 p
11.757337492 -0.25777289217E-01
1.5139617411 0.57359428604
0.58328591795 1.0798320002
1 p
0.21570478076 1.0000000000
1 p
0.41737000000E-01 1.0000000000
1 d
0.93000000000 1.0000000000
1 d
0.18000000000 1.0000000000
1 d
0.54000000000E-01 1.0000000000
*
*
ca def2-TZVP
# ca (17s12p4d) / [6s5p3d] {842111/63111/211}
*
8 s
172517.32685 0.23317502546E-03
25861.519275 0.18076521980E-02
5885.6618668 0.93943844255E-02
1665.9730031 0.38108409009E-01
542.36718148 0.12331203853
194.57803492 0.29004470954
75.303597636 0.40587151157
29.574062589 0.20398410743
4 s
191.20074660 -0.24419759759E-01
58.840299883 -0.11547027448
8.9642540845 0.56356636717
3.6856960541 0.56709682704
2 s
5.2464289726 -0.22825334325
0.84862621528 0.72625219172
1 s
0.36743300538 1.0000000000
1 s
0.66821582613E-01 1.0000000000
1 s
0.26759730445E-01 1.0000000000
6 p
836.97262058 0.25258346092E-02
197.93040142 0.20076506686E-01
63.135558054 0.91302987366E-01
23.282687170 0.25247029915
9.1176444932 0.39426326344
3.6336120139 0.23011559492
3 p
13.494163120 -0.26495021951E-01
1.8139259790 0.55088108210
0.71981826006 1.0280616620
1 p
0.27629576992 1.0000000000
1 p
0.74979000000E-01 1.0000000000
1 p
0.26927000000E-01 1.0000000000
2 d

```

```

5.4979093879      0.73770011433E-01
1.3177128032      0.26052853169
  1 d
0.32188682649     0.45233836380
  1 d
0.70528614919E-01  1.00000000000
*
*
sc def2-TZVP
# sc      (17s11p7d1f) / [6s4p4d1f]      {842111/6311/4111/1}
*
  8 s
191612.91874      0.23076475942E-03
28723.850363      0.17890329946E-02
6537.0116490      0.92990401140E-02
1850.3097171      0.37739438011E-01
602.38855156      0.12227148359
216.17324766      0.28814821470
83.712517880      0.40517543099
32.908707189      0.20566019623
  4 s
211.34393234      -0.24527991462E-01
65.128920139      -0.11570158142
10.034311535      0.55995283317
4.1596884597      0.56087765073
  2 s
6.0009041613      -0.22840494325
0.98255784150      0.71948970378
  1 s
0.42483192773      1.00000000000
  1 s
0.77185462096E-01  1.00000000000
  1 s
0.30147219702E-01  1.00000000000
  6 p
947.34122823      0.24737208744E-02
224.09699732      0.19742967060E-01
71.560334882      0.90357147549E-01
26.444824490      0.25201602503
10.393798285      0.39675535929
4.1606304559      0.23208624517
  3 p
15.565737135      -0.27129423974E-01
2.1121544865      0.55109256629
0.84184709021      1.0090635806
  1 p
0.32297542652      1.00000000000
  1 p
0.89748000000E-01  1.00000000000
  4 d
30.989390993      0.11902837431E-01
8.6905465069      0.67655856850E-01
2.9520256337      0.21332539722
1.0761910745      0.38391075578
  1 d
0.38338915095      0.43354716259
  1 d
0.12534686113      0.24509263822
  1 d
0.41000000000E-01  0.00000000000

```



```

1 f
0.34500000000 1.0000000000
*
*
ti def2-TZVP
# ti (17s11p7d1f) / [6s4p4d1f] {842111/6311/4111/1}
*
8 s
211575.69025 0.23318151011E-03
31714.945058 0.18079690851E-02
7217.5476543 0.93984311352E-02
2042.9394247 0.38156853618E-01
665.12896208 0.12374757197
238.74942264 0.29208551143
92.508691001 0.41226800855
36.403919209 0.21090534061
4 s
232.72624607 -0.24920140738E-01
71.791209711 -0.11746490087
11.158534615 0.56503342318
4.6548135416 0.56211101812
2 s
6.8034629174 -0.23011425503
1.1201076403 0.72103186735
1 s
0.48080118839 1.0000000000
1 s
0.85157274977E-01 1.0000000000
1 s
0.32657477046E-01 1.0000000000
6 p
1063.1474732 0.24690839320E-02
251.56507061 0.19773345523E-01
80.408554854 0.90987976672E-01
29.768193269 0.25559900413
11.736830556 0.40489386764
4.7142375230 0.23693402558
3 p
17.796803704 -0.27878639615E-01
2.4272698680 0.55672914668
0.96823445537 1.0055447350
1 p
0.37056694165 1.0000000000
1 p
0.10156100000 1.0000000000
4 d
37.713384723 0.11513835092E-01
10.692931184 0.67246343996E-01
3.6728446990 0.21484207775
1.3588590303 0.38890892779
1 d
0.49213295253 0.43040835243
1 d
0.16330520653 0.23253305465
1 d
0.54000000000E-01 0.0000000000
1 f
0.56200000000 1.0000000000
*
*

```

```
v def2-TZVP
# v      (17s11p7d1f) / [6s4p4d1f]      {842111/6311/4111/1}
*
```

```
  8 s
232340.65058      0.23072410092E-03
34828.841170     0.17888178962E-02
7926.5448691    0.92992490131E-02
2243.7733046    0.37761463347E-01
730.59322944    0.12255909662
262.32219631    0.28963508811
101.70403805    0.41004702955
40.064784617    0.21113610858
  4 s
255.24014968    -0.24458116338E-01
78.804646961    -0.11527205366
12.340598946    0.55174749453
5.1742019219    0.54504528489
  2 s
7.6513894469    -0.22967638286
1.2639759898    0.71683769077
  1 s
0.53861761721    1.0000000000
  1 s
0.92719296124E-01  1.0000000000
  1 s
0.34998055176E-01  1.0000000000
  6 p
1184.2369151    0.24449826729E-02
280.23075192    0.19643454466E-01
89.643627137    0.90796949190E-01
33.242411253    0.25650768222
13.144514452    0.40815393750
5.2948534140    0.23860378268
  3 p
20.175586851    -0.28241489023E-01
2.7605865197    0.55574635619
1.1008900902    0.99319919270
  1 p
0.42013310739    1.0000000000
  1 p
0.11124800000    1.0000000000
  4 d
43.861134864    0.11487174238E-01
12.516021891    0.68247153977E-01
4.3313854957    0.21837784195
1.6138855773    0.39245212296
  1 d
0.58749573961    0.42634466786
  1 d
0.19515723011    0.22646562601
  1 d
0.65000000000E-01  0.0000000000
  1 f
0.83100000000    1.0000000000
```

```
*
```

```
cr def2-TZVP
# cr      (17s11p7d1f) / [6s4p4d1f]      {842111/6311/4111/1}
*
```

```
  8 s
```

|                                |                      |
|--------------------------------|----------------------|
| 254477.80704                   | 0.23386945693E-03    |
| 38131.797054                   | 0.18142601800E-02    |
| 8675.2930607                   | 0.94363925721E-02    |
| 2455.0099848                   | 0.38343639367E-01    |
| 799.16217787                   | 0.12459194837        |
| 286.90021489                   | 0.29489696029        |
| 111.25413232                   | 0.41846149607        |
| 43.864152636                   | 0.21633763420        |
| 4 s                            |                      |
| 279.32669173                   | -0.23450908111E-01   |
| 86.274732376                   | -0.11080370027       |
| 13.555756113                   | 0.53028965842        |
| 5.6978112751                   | 0.51603516947        |
| 2 s                            |                      |
| 8.5636582615                   | -0.38109545675       |
| 1.3988296768                   | 1.1991591436         |
| 1 s                            |                      |
| 0.57288171116                  | 1.0000000000         |
| 1 s                            |                      |
| 0.90096171317E-01              | 1.0000000000         |
| 1 s                            |                      |
| 0.34125885135E-01              | 1.0000000000         |
| 6 p                            |                      |
| 1306.4398864                   | 0.24277326185E-02    |
| 309.25311441                   | 0.19544041017E-01    |
| 98.996273963                   | 0.90651794553E-01    |
| 36.756916451                   | 0.25699279154        |
| 14.566657077                   | 0.40935504891        |
| 5.8739937432                   | 0.23729388849        |
| 3 p                            |                      |
| 22.890999695                   | -0.28166026613E-01   |
| 3.0855001822                   | 0.56034120148        |
| 1.2132329118                   | 0.98119019650        |
| 1 p                            |                      |
| 0.44931680699                  | 1.0000000000         |
| 1 p                            |                      |
| 0.12067500000                  | 1.0000000000         |
| 4 d                            |                      |
| 43.720074476                   | 0.13622964026E-01    |
| 12.391242652                   | 0.78935180133E-01    |
| 4.2639442006                   | 0.23833840000        |
| 1.5525221790                   | 0.39526851122        |
| 1 d                            |                      |
| 0.53761929485                  | 0.41061717056        |
| 1 d                            |                      |
| 0.16493173074                  | 0.24440410795        |
| 1 d                            |                      |
| 0.51000000000E-01              | 0.0000000000         |
| 1 f                            |                      |
| 1.1470000000                   | 1.0000000000         |
| *                              |                      |
| *                              |                      |
| mn def2-TZVP                   |                      |
| # mn (17s11p7d1f) / [6s4p4d1f] | {842111/6311/4111/1} |
| *                              |                      |
| 8 s                            |                      |
| 277185.00153                   | 0.22838385133E-03    |
| 41550.769890                   | 0.17707650375E-02    |
| 9455.9700152                   | 0.92077209994E-02    |
| 2676.5206482                   | 0.37415971825E-01    |

|                                |                      |
|--------------------------------|----------------------|
| 871.46687530                   | 0.12164861426        |
| 312.98306420                   | 0.28824392499        |
| 121.44454051                   | 0.41041600847        |
| 47.922598829                   | 0.21372375145        |
| 4 s                            |                      |
| 303.66723163                   | -0.24589926140E-01   |
| 93.881403187                   | -0.11602608038       |
| 14.879421214                   | 0.55112059677        |
| 6.2865200745                   | 0.53707560756        |
| 2 s                            |                      |
| 9.4858591337                   | -0.22889262695       |
| 1.5698706158                   | 0.71196169587        |
| 1 s                            |                      |
| 0.65903213608                  | 1.0000000000         |
| 1 s                            |                      |
| 0.10686292371                  | 1.0000000000         |
| 1 s                            |                      |
| 0.39267435433E-01              | 1.0000000000         |
| 6 p                            |                      |
| 1444.7978182                   | 0.23994136455E-02    |
| 342.06551197                   | 0.19369286864E-01    |
| 109.58400891                   | 0.90236108988E-01    |
| 40.747988173                   | 0.25745467851        |
| 16.188626566                   | 0.41272351958        |
| 6.5484505964                   | 0.24087700007        |
| 3 p                            |                      |
| 25.357086437                   | -0.28707174058E-01   |
| 3.4830168782                   | 0.55208100712        |
| 1.3858800906                   | 0.97226901379        |
| 1 p                            |                      |
| 0.52555094893                  | 1.0000000000         |
| 1 p                            |                      |
| 0.12765000000                  | 1.0000000000         |
| 4 d                            |                      |
| 56.563189119                   | 0.11543245295E-01    |
| 16.278734711                   | 0.70299845987E-01    |
| 5.6964273914                   | 0.22450770821        |
| 2.1411147942                   | 0.39703065434        |
| 1 d                            |                      |
| 0.78291801938                  | 0.41941039165        |
| 1 d                            |                      |
| 0.25952311214                  | 0.21887261673        |
| 1 d                            |                      |
| 0.86000000000E-01              | 0.0000000000         |
| 1 f                            |                      |
| 1.3260000000                   | 1.0000000000         |
| *                              |                      |
| *                              |                      |
| fe def2-TZVP                   |                      |
| # fe (17s11p7d1f) / [6s4p4d1f] | {842111/6311/4111/1} |
| *                              |                      |
| 8 s                            |                      |
| 300784.84637                   | 0.22806273096E-03    |
| 45088.970557                   | 0.17681788761E-02    |
| 10262.516317                   | 0.91927083490E-02    |
| 2905.2897293                   | 0.37355495807E-01    |
| 946.11487137                   | 0.12151108426        |
| 339.87832894                   | 0.28818881468        |
| 131.94425588                   | 0.41126612677        |
| 52.111494077                   | 0.21518583573        |

```

4 s
329.48839267      -0.24745216477E-01
101.92332739      -0.11683089050
16.240462745      0.55293621136
6.8840675801      0.53601640182
2 s
10.470693782      -0.22912708577
1.7360039648      0.71159319984
1 s
0.72577288979      1.00000000000
1 s
0.11595528203      1.00000000000
1 s
0.41968227746E-01  1.00000000000
6 p
1585.3959970      0.23793960179E-02
375.38006499      0.19253154755E-01
120.31816501      0.90021836536E-01
44.788749031      0.25798172356
17.829278584      0.41492649744
7.2247153786      0.24207474784
3 p
28.143219756      -0.29041755152E-01
3.8743241412      0.55312260343
1.5410752281      0.96771136842
1 p
0.58285615250      1.00000000000
1 p
0.13491500000      1.00000000000
4 d
61.996675034      0.11971972255E-01
17.873732552      0.73210135410E-01
6.2744782934      0.23103094314
2.3552337175      0.39910706494
1 d
0.85432239901      0.41391589765
1 d
0.27869254413      0.21909269782
1 d
0.91000000000E-01  0.00000000000
1 f
1.59800000000      1.00000000000
*
*
co def2-TZVP
# co      (17s11p7d1f) / [6s4p4d1f]      {842111/6311/4111/1}
*
8 s
325817.01553      0.22568462484E-03
48839.636453      0.17499397533E-02
11114.937307      0.91003134097E-02
3146.1603642      0.36996256837E-01
1024.4378465      0.12044269621
368.02508816      0.28598731649
142.91229205      0.40908312004
56.482649209      0.21500145739
4 s
356.40298318      -0.24767059678E-01
110.31165215      -0.11702139134
17.659634834      0.55215522200

```

|                                |                      |
|--------------------------------|----------------------|
| 7.5059030479                   | 0.53246877060        |
| 2 s                            |                      |
| 11.501807176                   | -0.22942470077       |
| 1.9081994606                   | 0.71180933514        |
| 1 s                            |                      |
| 0.79396696891                  | 1.00000000000        |
| 1 s                            |                      |
| 0.12444448829                  | 1.00000000000        |
| 1 s                            |                      |
| 0.44444645379E-01              | 1.00000000000        |
| 6 p                            |                      |
| 1731.1369144                   | 0.23905767685E-02    |
| 409.91750438                   | 0.19382999967E-01    |
| 131.45648578                   | 0.90905448509E-01    |
| 48.987439714                   | 0.26146681577        |
| 19.537078992                   | 0.42157264570        |
| 7.9287281634                   | 0.24571813557        |
| 3 p                            |                      |
| 31.076017584                   | -0.29438069973E-01   |
| 4.2835180697                   | 0.55615568168        |
| 1.7022921563                   | 0.96772195064        |
| 1 p                            |                      |
| 0.64202908602                  | 1.00000000000        |
| 1 p                            |                      |
| 0.14130800000                  | 1.00000000000        |
| 4 d                            |                      |
| 68.140745239                   | 0.11983845360E-01    |
| 19.685241019                   | 0.73688540475E-01    |
| 6.9322128825                   | 0.23085496779        |
| 2.6025125694                   | 0.39281059225        |
| 1 d                            |                      |
| 0.94016837302                  | 0.40203412228        |
| 1 d                            |                      |
| 0.30381457794                  | 0.21415606743        |
| 1 d                            |                      |
| 0.98000000000E-01              | 0.00000000000        |
| 1 f                            |                      |
| 1.90300000000                  | 1.00000000000        |
| *                              |                      |
| *                              |                      |
| ni def2-TZVP                   |                      |
| # ni (17s11p7d1f) / [6s4p4d1f] | {842111/6311/4111/1} |
| *                              |                      |
| 8 s                            |                      |
| 351535.72935                   | 0.22529386884E-03    |
| 52695.809283                   | 0.17468616223E-02    |
| 11992.468293                   | 0.90849992136E-02    |
| 3394.5776689                   | 0.36940748447E-01    |
| 1105.3594585                   | 0.12032819950        |
| 397.14677769                   | 0.28596715057        |
| 154.27542974                   | 0.40983020196        |
| 61.018723780                   | 0.21620642851        |
| 4 s                            |                      |
| 384.45559739                   | -0.24651279268E-01   |
| 119.04879199                   | -0.11658505277       |
| 19.137012223                   | 0.54864126676        |
| 8.1526718562                   | 0.52640051122        |
| 2 s                            |                      |
| 12.579408642                   | -0.22797884293       |
| 2.0870866081                   | 0.70703738215        |

|                                |                      |  |
|--------------------------------|----------------------|--|
| 1 s                            |                      |  |
| 0.86432568555                  | 1.0000000000         |  |
| 1 s                            |                      |  |
| 0.13283169217                  | 1.0000000000         |  |
| 1 s                            |                      |  |
| 0.46845327726E-01              | 1.0000000000         |  |
| 6 p                            |                      |  |
| 1883.0907486                   | 0.23748258443E-02    |  |
| 445.95155320                   | 0.19289457172E-01    |  |
| 143.08430815                   | 0.90718211507E-01    |  |
| 53.372920722                   | 0.26181414117        |  |
| 21.321919357                   | 0.42309149832        |  |
| 8.6643561994                   | 0.24641686015        |  |
| 3 p                            |                      |  |
| 34.144255211                   | -0.29677129163E-01   |  |
| 4.7122455921                   | 0.55616824096        |  |
| 1.8709231845                   | 0.96357766460        |  |
| 1 p                            |                      |  |
| 0.70370016267                  | 1.0000000000         |  |
| 1 p                            |                      |  |
| 0.14658800000                  | 1.0000000000         |  |
| 4 d                            |                      |  |
| 74.591603465                   | 0.12077454672E-01    |  |
| 21.590632752                   | 0.74637262154E-01    |  |
| 7.6246142580                   | 0.23236775502        |  |
| 2.8632206762                   | 0.39042651680        |  |
| 1 d                            |                      |  |
| 1.0311063388                   | 0.39509498921        |  |
| 1 d                            |                      |  |
| 0.33060760691                  | 0.21138769167        |  |
| 1 d                            |                      |  |
| 0.10600000000                  | 0.0000000000         |  |
| 1 f                            |                      |  |
| 2.1740000000                   | 1.0000000000         |  |
| *                              |                      |  |
| *                              |                      |  |
| cu def2-TZVP                   |                      |  |
| # cu (17s11p7d1f) / [6s4p4d1f] | {842111/6311/4111/1} |  |
| *                              |                      |  |
| 8 s                            |                      |  |
| 377518.79923                   | 0.22811766128E-03    |  |
| 56589.984311                   | 0.17688035931E-02    |  |
| 12878.711706                   | 0.91993460227E-02    |  |
| 3645.3752143                   | 0.37411016434E-01    |  |
| 1187.0072945                   | 0.12189873737        |  |
| 426.46421902                   | 0.28983900714        |  |
| 165.70660164                   | 0.41531872174        |  |
| 65.598942707                   | 0.21905799287        |  |
| 4 s                            |                      |  |
| 414.41265811                   | -0.24682525053E-01   |  |
| 128.32056039                   | -0.11716827406       |  |
| 20.622089750                   | 0.55301315941        |  |
| 8.7821226045                   | 0.52242718609        |  |
| 2 s                            |                      |  |
| 13.741372006                   | -0.22736061821       |  |
| 2.2431246833                   | 0.71761210873        |  |
| 1 s                            |                      |  |
| 0.89370549079                  | 1.0000000000         |  |
| 1 s                            |                      |  |
| 0.10836699534                  | 1.0000000000         |  |

```

1 s
0.38806178058E-01 1.0000000000
6 p
2034.7596692 0.23524822298E-02
481.90468106 0.19134070751E-01
154.67482963 0.90171105278E-01
57.740576969 0.26063284735
23.099052811 0.42093485770
9.3882478591 0.24344615121
3 p
37.596171210 -0.28991094530E-01
5.1240690810 0.54919083831
2.0119996085 0.93793330488
1 p
0.73860686002 1.0000000000
1 p
0.15506500000 1.0000000000
4 d
74.129460637 0.14363216676E-01
21.359842587 0.86628177096E-01
7.4995240537 0.25631430541
2.7601394169 0.40374062368
1 d
0.95362061236 0.39427042447
1 d
0.28420862520 0.23091146816
1 d
0.85000000000E-01 0.0000000000
1 f
2.23300000000 1.0000000000
*
*
zn def2-TZVP
# zn (17s12p7d1f) / [6s5p4d1f] {842111/63111/4111/1}
*
8 s
405924.31028 0.22442017483E-03
60846.955735 0.17402086626E-02
13847.343092 0.90513339565E-02
3919.6158551 0.36817341445E-01
1276.3594167 0.12004850256
458.67254435 0.28576057621
178.28725246 0.41087462062
70.612192837 0.21816962456
4 s
443.88077950 -0.24934274984E-01
137.55875267 -0.11817955766
22.268083479 0.55367318468
9.5217310606 0.52628934936
2 s
14.874114065 -0.22929955254
2.4647517612 0.71135484742
1 s
1.0113272238 1.0000000000
1 s
0.14919852089 1.0000000000
1 s
0.51441872981E-01 1.0000000000
6 p
2205.3508534 0.23356240448E-02

```



|                                                      |                    |
|------------------------------------------------------|--------------------|
| 522.35300699                                         | 0.19031022634E-01  |
| 167.73055542                                         | 0.89955758675E-01  |
| 62.670045373                                         | 0.26113248631      |
| 25.109749456                                         | 0.42348448173      |
| 10.225142681                                         | 0.24618926885      |
| 3 p                                                  |                    |
| 40.713442521                                         | -0.30029667592E-01 |
| 5.6247090696                                         | 0.55575254864      |
| 2.2279949116                                         | 0.95581013442      |
| 1 p                                                  |                    |
| 0.83354741691                                        | 1.0000000000       |
| 1 p                                                  |                    |
| 0.16245500000                                        | 1.0000000000       |
| 1 p                                                  |                    |
| 0.47769000000E-01                                    | 1.0000000000       |
| 4 d                                                  |                    |
| 88.554315311                                         | 0.12728170015E-01  |
| 25.721525557                                         | 0.79394499843E-01  |
| 9.1278367624                                         | 0.24491506805      |
| 3.4312364064                                         | 0.40390526479      |
| 1 d                                                  |                    |
| 1.2308920645                                         | 0.40158491145      |
| 1 d                                                  |                    |
| 0.39031845112                                        | 0.21579805034      |
| 1 d                                                  |                    |
| 0.12400000000                                        | 0.0000000000       |
| 1 f                                                  |                    |
| 2.6140000000                                         | 1.0000000000       |
| *                                                    |                    |
| *                                                    |                    |
| ga def2-TZVP                                         |                    |
| # ga (17s12p8d1f) / [6s5p4d1f] {842111/63111/5111/1} |                    |
| *                                                    |                    |
| 8 s                                                  |                    |
| 435548.66254                                         | 0.23646329650E-03  |
| 65289.589031                                         | 0.18335271776E-02  |
| 14858.784256                                         | 0.95371863081E-02  |
| 4205.9734729                                         | 0.38803412468E-01  |
| 1369.6416431                                         | 0.12661604848      |
| 492.30348905                                         | 0.30175310292      |
| 191.41923233                                         | 0.43543934218      |
| 75.840558665                                         | 0.23282363780      |
| 4 s                                                  |                    |
| 474.30810613                                         | -0.26743707958E-01 |
| 147.10297560                                         | -0.12654657542     |
| 23.982599435                                         | 0.58840346839      |
| 10.298230094                                         | 0.56324271589      |
| 2 s                                                  |                    |
| 16.050381430                                         | -0.24516439508     |
| 2.6988468784                                         | 0.74578049593      |
| 1 s                                                  |                    |
| 1.1428588736                                         | 1.0000000000       |
| 1 s                                                  |                    |
| 0.20217652251                                        | 1.0000000000       |
| 1 s                                                  |                    |
| 0.71980152032E-01                                    | 1.0000000000       |
| 6 p                                                  |                    |
| 2432.0171070                                         | 0.22434065928E-02  |
| 576.12049582                                         | 0.18342265336E-01  |
| 185.11584354                                         | 0.87279697167E-01  |

|                                |                       |
|--------------------------------|-----------------------|
| 69.246572556                   | 0.25684868351         |
| 27.818107777                   | 0.42398378107         |
| 11.420229938                   | 0.25701340043         |
| 3 p                            |                       |
| 42.819661530                   | -0.19326519119E-01    |
| 6.3885901000                   | 0.31571386917         |
| 2.6698993326                   | 0.57617792822         |
| 1 p                            |                       |
| 1.0781783834                   | 1.0000000000          |
| 1 p                            |                       |
| 0.22796559371                  | 1.0000000000          |
| 1 p                            |                       |
| 0.62836234833E-01              | 1.0000000000          |
| 5 d                            |                       |
| 103.92331829                   | 0.11464613652E-01     |
| 30.371094389                   | 0.73625747383E-01     |
| 10.872078097                   | 0.23505107382         |
| 4.1549137954                   | 0.40318563513         |
| 1.5345659145                   | 0.40824748152         |
| 1 d                            |                       |
| 0.51114263830                  | 0.20502439263         |
| 1 d                            |                       |
| 0.30622000000                  | 1.0000000000          |
| 1 d                            |                       |
| 0.11391309000                  | 1.0000000000          |
| 1 f                            |                       |
| 0.30996095000                  | 1.0000000000          |
| *                              |                       |
| *                              |                       |
| ge def2-TZVP                   |                       |
| # ge (17s12p8d1f) / [6s5p4d1f] | {842111/63111/5111/1} |
| *                              |                       |
| 8 s                            |                       |
| 466115.00592                   | 0.22487264660E-03     |
| 69875.420762                   | 0.17435426729E-02     |
| 15903.276716                   | 0.90691482206E-02     |
| 4501.8233453                   | 0.36906174685E-01     |
| 1466.0570924                   | 0.12050167907         |
| 527.07841728                   | 0.28748641703         |
| 205.00395074                   | 0.41622321885         |
| 81.251596065                   | 0.22397845695         |
| 4 s                            |                       |
| 505.74661282                   | -0.25184609291E-01    |
| 156.96593744                   | -0.11898929721        |
| 25.761448176                   | 0.54930135870         |
| 11.106654687                   | 0.52939309129         |
| 2 s                            |                       |
| 17.272059104                   | -0.22854595728        |
| 2.9438289048                   | 0.68377930317         |
| 1 s                            |                       |
| 1.2839164916                   | 1.0000000000          |
| 1 s                            |                       |
| 0.25873337445                  | 1.0000000000          |
| 1 s                            |                       |
| 0.93524913177E-01              | 1.0000000000          |
| 6 p                            |                       |
| 2633.9346241                   | 0.22143925310E-02     |
| 624.00161628                   | 0.18140899141E-01     |
| 200.58528404                   | 0.86632184922E-01     |
| 75.097081525                   | 0.25649020592         |

|                                |                       |
|--------------------------------|-----------------------|
| 30.214388474                   | 0.42658611262         |
| 12.440087567                   | 0.26200527313         |
| 3 p                            |                       |
| 45.981316002                   | -0.20321767678E-01    |
| 6.9945654416                   | 0.32013744527         |
| 2.9686001327                   | 0.59051014555         |
| 1 p                            |                       |
| 1.2320988495                   | 1.0000000000          |
| 1 p                            |                       |
| 0.28981614974                  | 1.0000000000          |
| 1 p                            |                       |
| 0.85564606447E-01              | 1.0000000000          |
| 5 d                            |                       |
| 119.44887581                   | 0.10586544521E-01     |
| 35.062915293                   | 0.69601280945E-01     |
| 12.636924529                   | 0.22807035287         |
| 4.8888672922                   | 0.40301067220         |
| 1.8453195392                   | 0.41304847015         |
| 1 d                            |                       |
| 0.63571158892                  | 0.19639209740         |
| 1 d                            |                       |
| 0.35492132000                  | 1.0000000000          |
| 1 d                            |                       |
| 0.13155709000                  | 1.0000000000          |
| 1 f                            |                       |
| 0.36210645000                  | 1.0000000000          |
| *                              |                       |
| *                              |                       |
| as def2-TZVP                   |                       |
| # as (17s13p8d1f) / [6s5p4d1f] | {842111/64111/5111/1} |
| *                              |                       |
| 8 s                            |                       |
| 498032.42158                   | 0.22740196900E-03     |
| 74656.868743                   | 0.17632816413E-02     |
| 16990.960004                   | 0.91728040381E-02     |
| 4809.6200321                   | 0.37337829344E-01     |
| 1566.2887055                   | 0.12199536117         |
| 563.21360499                   | 0.29137475324         |
| 219.11179978                   | 0.42326351479         |
| 86.866061030                   | 0.22921464278         |
| 4 s                            |                       |
| 538.19512479                   | -0.25254197297E-01    |
| 167.14850224                   | -0.11915461115        |
| 27.605517159                   | 0.54628495980         |
| 11.947858521                   | 0.53001520976         |
| 2 s                            |                       |
| 18.538023133                   | -0.23479188136        |
| 3.2018985739                   | 0.69167053428         |
| 1 s                            |                       |
| 1.4356522077                   | 1.0000000000          |
| 1 s                            |                       |
| 0.31837805200                  | 1.0000000000          |
| 1 s                            |                       |
| 0.11622632186                  | 1.0000000000          |
| 6 p                            |                       |
| 2678.9421546                   | 0.23318955287E-02     |
| 634.61765840                   | 0.19042149977E-01     |
| 203.93967606                   | 0.90229744913E-01     |
| 76.323890369                   | 0.26169037693         |
| 30.664124943                   | 0.41857168155         |

```

12.505056732      0.23447830190
 4 p
49.256229549     -0.21235539870E-01
7.7274891466     0.30470206668
3.5410493476     0.52888373107
1.6985585501     0.37272250955
 1 p
0.76848071044    1.00000000000
 1 p
0.30050823260    1.00000000000
 1 p
0.98190639437E-01 1.00000000000
 5 d
135.33289305     0.99291144106E-02
39.860212744     0.66568843496E-01
14.446428359     0.22275768307
5.6432900356     0.40309224382
2.1668188623     0.41671667946
 1 d
0.76514970569    0.18935502288
 1 d
0.42434653000    1.00000000000
 1 d
0.16331527000    1.00000000000
 1 f
0.43271941000    1.00000000000
*
*
se def2-TZVP
# se      (17s13p8d1f) / [6s5p4d1f]      {842111/64111/5111/1}
*
 8 s
531071.66696     0.24108973168E-03
79603.044117     0.18696431441E-02
18115.844240     0.97271616536E-02
5127.8923194     0.39604793031E-01
1669.9130839     0.12948855136
600.57534527     0.30959437289
233.70021247     0.45115769216
92.672443932     0.24579189033
 4 s
571.57513675     -0.26895707881E-01
177.63686375     -0.12670989353
29.517767052     0.57699001719
12.824399795     0.56369075408
 2 s
19.848235841     -0.25132415534
3.4744018486     0.72905416980
 1 s
1.5988910849     1.00000000000
 1 s
0.38333469387     1.00000000000
 1 s
0.14049742459     1.00000000000
 6 p
2815.3500566     0.25569026854E-02
666.92558298     0.20874026901E-01
214.34213188     0.98772096250E-01
80.246687942     0.28471821221
32.251081288     0.45003584934

```

|                                |                       |  |
|--------------------------------|-----------------------|--|
| 13.106432562                   | 0.24416091055         |  |
| 4 p                            |                       |  |
| 53.366108516                   | -0.21558456273E-01    |  |
| 8.1827777195                   | 0.32662310638         |  |
| 3.6239945672                   | 0.57740499319         |  |
| 1.6341591401                   | 0.34301320826         |  |
| 1 p                            |                       |  |
| 0.58418320228                  | 1.0000000000          |  |
| 1 p                            |                       |  |
| 0.23966269279                  | 1.0000000000          |  |
| 1 p                            |                       |  |
| 0.88785134803E-01              | 1.0000000000          |  |
| 5 d                            |                       |  |
| 151.82910279                   | 0.93970276988E-02     |  |
| 44.839992523                   | 0.64086503991E-01     |  |
| 16.328999510                   | 0.21834238004         |  |
| 6.4305057612                   | 0.40314789649         |  |
| 2.5048025169                   | 0.41966491490         |  |
| 1 d                            |                       |  |
| 0.90271148434                  | 0.18366663432         |  |
| 1 d                            |                       |  |
| 0.47683613000                  | 1.0000000000          |  |
| 1 d                            |                       |  |
| 0.18535160000                  | 1.0000000000          |  |
| 1 f                            |                       |  |
| 0.48866905000                  | 1.0000000000          |  |
| *                              |                       |  |
| *                              |                       |  |
| br def2-TZVP                   |                       |  |
| # br (17s13p8d1f) / [6s5p4d1f] | {842111/64111/5111/1} |  |
| *                              |                       |  |
| 8 s                            |                       |  |
| 565073.25256                   | 0.23660314690E-03     |  |
| 84701.723179                   | 0.18348332508E-02     |  |
| 19276.271900                   | 0.95465849860E-02     |  |
| 5456.4284576                   | 0.38877142153E-01     |  |
| 1776.9503500                   | 0.12718314231         |  |
| 639.19398276                   | 0.30437662191         |  |
| 248.78823961                   | 0.44490940497         |  |
| 98.678305494                   | 0.24381643058         |  |
| 4 s                            |                       |  |
| 606.07824568                   | -0.26527158709E-01    |  |
| 188.45598484                   | -0.12484584809        |  |
| 31.497144506                   | 0.56468683559         |  |
| 13.736008320                   | 0.55555268564         |  |
| 2 s                            |                       |  |
| 21.203212766                   | -0.24940920493        |  |
| 3.7616420178                   | 0.71213119743         |  |
| 1 s                            |                       |  |
| 1.7735933962                   | 1.0000000000          |  |
| 1 s                            |                       |  |
| 0.45197413664                  | 1.0000000000          |  |
| 1 s                            |                       |  |
| 0.16613377099                  | 1.0000000000          |  |
| 6 p                            |                       |  |
| 3019.6955723                   | 0.24971049798E-02     |  |
| 715.35481126                   | 0.20419267596E-01     |  |
| 229.98328751                   | 0.96897148309E-01     |  |
| 86.167844615                   | 0.28053901252         |  |
| 34.667870802                   | 0.44606390473         |  |

|                                |                       |  |
|--------------------------------|-----------------------|--|
| 14.113870307                   | 0.24410073923         |  |
| 4 p                            |                       |  |
| 57.085653082                   | -0.21855950710E-01    |  |
| 8.8193845840                   | 0.32707075320         |  |
| 3.9340302872                   | 0.57855229520         |  |
| 1.7998830384                   | 0.33570987698         |  |
| 1 p                            |                       |  |
| 0.66899410512                  | 1.0000000000          |  |
| 1 p                            |                       |  |
| 0.27136238231                  | 1.0000000000          |  |
| 1 p                            |                       |  |
| 0.10083790243                  | 1.0000000000          |  |
| 5 d                            |                       |  |
| 168.85370257                   | 0.89663981988E-02     |  |
| 49.977949919                   | 0.62062059316E-01     |  |
| 18.274913338                   | 0.21474732384         |  |
| 7.2455694631                   | 0.40335336746         |  |
| 2.8562315025                   | 0.42208813080         |  |
| 1 d                            |                       |  |
| 1.0459621144                   | 0.17874813267         |  |
| 1 d                            |                       |  |
| 0.56865655000                  | 1.0000000000          |  |
| 1 d                            |                       |  |
| 0.22031490000                  | 1.0000000000          |  |
| 1 f                            |                       |  |
| 0.57083312000                  | 1.0000000000          |  |
| *                              |                       |  |
| *                              |                       |  |
| kr def2-TZVP                   |                       |  |
| # kr (17s13p8d1f) / [6s5p4d1f] | {842111/64111/5111/1} |  |
| *                              |                       |  |
| 8 s                            |                       |  |
| 600250.97575                   | 0.23740610399E-03     |  |
| 89976.650781                   | 0.18410240539E-02     |  |
| 20476.814225                   | 0.95795580699E-02     |  |
| 5796.1554078                   | 0.39020650488E-01     |  |
| 1887.5913196                   | 0.12772645628         |  |
| 679.11458519                   | 0.30596521300         |  |
| 264.38244511                   | 0.44857474437         |  |
| 104.88368574                   | 0.24722957327         |  |
| 4 s                            |                       |  |
| 641.47370764                   | -0.26745279805E-01    |  |
| 199.57524820                   | -0.12571122567        |  |
| 33.545462954                   | 0.56483736390         |  |
| 14.683955144                   | 0.55972765539         |  |
| 2 s                            |                       |  |
| 22.603101860                   | -0.25298771800        |  |
| 4.0650682991                   | 0.70992159965         |  |
| 1 s                            |                       |  |
| 1.9611027060                   | 1.0000000000          |  |
| 1 s                            |                       |  |
| 0.52465147979                  | 1.0000000000          |  |
| 1 s                            |                       |  |
| 0.19332399511                  | 1.0000000000          |  |
| 6 p                            |                       |  |
| 3232.9589614                   | 0.24885607974E-02     |  |
| 765.96442694                   | 0.20379007428E-01     |  |
| 246.33940810                   | 0.96977188584E-01     |  |
| 92.365283041                   | 0.28199960954         |  |
| 37.199509551                   | 0.45116254358         |  |

|                                            |                    |
|--------------------------------------------|--------------------|
| 15.172166534                               | 0.24917131496      |
| 4 p                                        |                    |
| 60.931321698                               | -0.22173603519E-01 |
| 9.4792600646                               | 0.32838462778      |
| 4.2564686326                               | 0.58124997120      |
| 1.9729313762                               | 0.32863541783      |
| 1 p                                        |                    |
| 0.76337108716                              | 1.0000000000       |
| 1 p                                        |                    |
| 0.30943625526                              | 1.0000000000       |
| 1 p                                        |                    |
| 0.11569704458                              | 1.0000000000       |
| 5 d                                        |                    |
| 186.41760904                               | 0.86120284601E-02  |
| 55.274124345                               | 0.60394406304E-01  |
| 20.283219120                               | 0.21181331869      |
| 8.0884536976                               | 0.40366293413      |
| 3.2214033853                               | 0.42402860686      |
| 1 d                                        |                    |
| 1.1952170102                               | 0.17441742274      |
| 1 d                                        |                    |
| 0.64800000000                              | 1.0000000000       |
| 1 d                                        |                    |
| 0.25100000000                              | 1.0000000000       |
| 1 f                                        |                    |
| 0.62800000000                              | 1.0000000000       |
| *                                          |                    |
| *                                          |                    |
| rb def2-TZVP                               |                    |
| # rb (7s7p3d) / [6s4p3d] {211111/4111/111} |                    |
| *                                          |                    |
| 2 s                                        |                    |
| 7.4744618040                               | 0.26997866363      |
| 6.7296180594                               | -0.42629251814     |
| 1 s                                        |                    |
| 2.7816640004                               | 1.0000000000       |
| 1 s                                        |                    |
| 0.53452175148                              | 1.0000000000       |
| 1 s                                        |                    |
| 0.22368793034                              | 1.0000000000       |
| 1 s                                        |                    |
| 0.32410407052E-01                          | 1.0000000000       |
| 1 s                                        |                    |
| 0.14171047424E-01                          | 1.0000000000       |
| 4 p                                        |                    |
| 5.6720643194                               | 0.48114224135E-01  |
| 3.3320183956                               | -0.18485131426     |
| 0.80150054910                              | 0.42811864954      |
| 0.36302220227                              | 0.58673165411      |
| 1 p                                        |                    |
| 0.15733924392                              | 1.0000000000       |
| 1 p                                        |                    |
| 0.40000000000E-01                          | 1.0000000000       |
| 1 p                                        |                    |
| 0.16000000000E-01                          | 1.0000000000       |
| 1 d                                        |                    |
| 0.25907866956                              | 0.76806746340E-01  |
| 1 d                                        |                    |
| 0.42507438045E-01                          | 0.37846160487      |
| 1 d                                        |                    |

```

0.11909276840E-01  1.0000000000
*
rb def2-ecp
*
  ncore =    28          lmax =    3
#   coefficient  r^n      exponent
f      -12.3169000    2        3.8431140
s-f      89.5001980    2        5.0365510
         0.4937610    2        1.9708490
         12.3169000    2        3.8431140
p-f      58.5689740    2        4.2583410
         0.4317910    2        1.4707090
         12.3169000    2        3.8431140
d-f      26.2248980    2        3.0231270
         0.9628390    2        0.6503830
         12.3169000    2        3.8431140
*
*
sr def2-TZVP
# sr      (7s7p5d) / [6s4p3d]      {211111/4111/311}
*
  2  s
  10.000000000    -0.18530550262
  8.5000000000    0.33970355376
  1  s
  3.0057048856    1.0000000000
  1  s
  0.61161287650    1.0000000000
  1  s
  0.27393841217    1.0000000000
  1  s
  0.57435564563E-01  1.0000000000
  1  s
  0.23338198665E-01  1.0000000000
  4  p
  7.5883077869    0.33731690287E-01
  3.6731307392    -0.20523185005
  0.90496618455    0.49209972665
  0.43310256408    0.62105296512
  1  p
  0.20222168964    1.0000000000
  1  p
  0.72000000000E-01  1.0000000000
  1  p
  0.25000000000E-01  1.0000000000
  3  d
  3.6180810000    -0.75010000000E-02
  0.99665600000    0.10809800000
  0.39073500000    0.27854000000
  1  d
  0.12277000000    1.0000000000
  1  d
  0.36655000000E-01  1.0000000000
*
sr def2-ecp
*

```



```

ncore = 28          lmax = 3
# coefficient      r^n      exponent
f
-15.8059920      2          4.6339750
s-f
135.4794300     2          7.4000740
17.5344630      2          3.6063790
15.8059920      2          4.6339750
p-f
88.3597090      2          6.4848680
15.3943720      2          3.2880530
15.8059920      2          4.6339750
d-f
29.8889870      2          4.6228410
6.6594140       2          2.2469040
15.8059920      2          4.6339750
*
*
y def2-TZVP
# y      (7s7p5d1f) / [6s4p3d1f]      {211111/4111/311/1}
*
2 s
10.000000000    -0.17487686796
8.500000000     0.34152345084
1 s
3.3653905454    1.00000000000
1 s
0.68860679385    1.00000000000
1 s
0.31191502936    1.00000000000
1 s
0.70326042567E-01  1.00000000000
1 s
0.27733859327E-01  1.00000000000
4 p
8.0554093616     0.36410978939E-01
4.0163458751    -0.20872572547
1.0232915404     0.48956929335
0.49843561636    0.60611943833
1 p
0.23307661842    1.00000000000
1 p
0.80000000000E-01  1.00000000000
1 p
0.27000000000E-01  1.00000000000
3 d
3.9030833060    -0.98209792625E-02
1.1363234302     0.19183629664
0.45617043877    0.40597788539
1 d
0.17470950748    1.00000000000
1 d
0.61978796638E-01  1.00000000000
1 f
0.26515000000    1.00000000000
*
y def2-ecp
*
ncore = 28          lmax = 3
# coefficient      r^n      exponent

```

```

f
    -19.1221981    2    6.5842120
    -2.4363754    2    3.2921060
s-f
    135.1538441    2    7.4880494
    15.5524413    2    3.7440247
    19.1221981    2    6.5842120
    2.4363754    2    3.2921060
p-f
    87.7849917    2    6.4453772
    11.5640660    2    3.2226886
    19.1221981    2    6.5842120
    2.4363754    2    3.2921060
d-f
    29.7010007    2    4.6584472
    5.5399685    2    2.3292236
    19.1221981    2    6.5842120
    2.4363754    2    3.2921060
*
*
zr def2-TZVP
# zr      (7s7p5d1f) / [6s4p3d1f]      {211111/4111/311/1}
*
    2 s
    11.0000000000    -0.19075595257
    9.5000000000    0.33895588754
    1 s
    3.6383667759    1.0000000000
    1 s
    0.76822026698    1.0000000000
    1 s
    0.34036824036    1.0000000000
    1 s
    0.75261298085E-01    1.0000000000
    1 s
    0.30131404705E-01    1.0000000000
    4 p
    8.6066305543    0.40404260236E-01
    4.4400979958    -0.21187745201
    1.1281026946    0.49164266891
    0.54346076310    0.57303370658
    1 p
    0.25022406048    1.0000000000
    1 p
    0.85000000000E-01    1.0000000000
    1 p
    0.29000000000E-01    1.0000000000
    3 d
    4.5567957795    -0.96190569023E-02
    1.2904939797    0.20569990155
    0.51646987222    0.41831381851
    1 d
    0.19349797794    1.0000000000
    1 d
    0.67309809967E-01    1.0000000000
    1 f
    0.39261000000    1.0000000000
*
zr def2-ecp
*

```

```

ncore = 28          lmax = 3
# coefficient      r^n      exponent
f
  -21.0937760      2          7.5400000
  -3.0806943      2          3.7700000
s-f
  150.2675911     2          8.2000000
  18.9762165     2          4.0897278
  21.0937760     2          7.5400000
  3.0806943      2          3.7700000
p-f
  99.6221237     2          7.1100000
  14.1687333     2          3.5967980
  21.0937760     2          7.5400000
  3.0806943      2          3.7700000
d-f
  35.0451235     2          5.3500000
  6.1112595     2          2.4918215
  21.0937760     2          7.5400000
  3.0806943      2          3.7700000
*
*
nb def2-TZVP
# nb      (7s7p5d1f) / [6s4p3d1f]      {211111/4111/311/1}
*
  2 s
  12.000000000    -0.20219507530
  10.500000000    0.33640105939
  1 s
  3.9276062854    1.00000000000
  1 s
  0.85976543258    1.00000000000
  1 s
  0.39074087505    1.00000000000
  1 s
  0.86387259879E-01  1.00000000000
  1 s
  0.32906200326E-01  1.00000000000
  4 p
  9.2056285646     0.43347689874E-01
  4.8679632125    -0.21302479233
  1.2442155792     0.48102127136
  0.60390590312    0.53917858960
  1 p
  0.27967675553    1.00000000000
  1 p
  0.90000000000E-01  1.00000000000
  1 p
  0.30000000000E-01  1.00000000000
  3 d
  4.6170975867    -0.13574476955E-01
  1.5663438480     0.20374310496
  0.66952425826    0.42997453105
  1 d
  0.27140946867    1.00000000000
  1 d
  0.10054426592    1.00000000000
  1 f
  0.52270000000    1.00000000000
*

```

nb def2-ecp

```
*
# ncore = 28          lmax = 3
# coefficient r^n      exponent
f      -22.9295500    2          8.4900000
      -3.6663099     2          4.2500000
s-f    165.1791435    2          8.9000000
      21.9929744     2          4.4300000
      22.9295500     2          8.4900000
      3.6663099      2          4.2500000
p-f    111.7944145    2          7.7700000
      16.6334833     2          3.9600000
      22.9295500     2          8.4900000
      3.6663099      2          4.2500000
d-f    38.1122488     2          6.0500000
      8.0391673      2          2.8400000
      22.9295500     2          8.4900000
      3.6663099      2          4.2500000
*
*
```

mo def2-TZVP

```
# mo      (7s7p5d1f) / [6s4p3d1f]      {211111/4111/311/1}
```

```
*
*
2 s
14.000000000    -0.22490043406
12.500000000    0.33151248555
1 s
4.0921501803    1.00000000000
1 s
0.97053602586    1.00000000000
1 s
0.44217620170    1.00000000000
1 s
0.92915024334E-01  1.00000000000
1 s
0.35016314389E-01  1.00000000000
4 p
8.8931117915    0.69994449475E-01
5.4689112270    -0.23547141883
1.3548473007    0.46315460007
0.65494867461    0.48820184710
1 p
0.30428197472    1.00000000000
1 p
0.10000000000    1.00000000000
1 p
0.33000000000E-01  1.00000000000
3 d
5.0044445497    -0.21587364862E-01
1.7736823324    0.20958680086
0.76950591696    0.43730880599
1 d
0.31530878939    1.00000000000
1 d
0.11754374390    1.00000000000
1 f
```

```

0.65545000000      1.0000000000
*
mo def2-ecp
*
  ncore =      28          lmax =      3
#   coefficient   r^n      exponent
f      -24.8051771      2      9.4500000
      -4.1537815      2      4.7200000
s-f      180.1031085      2      9.7145938
      24.9972279      2      4.6805004
      24.8051771      2      9.4500000
      4.1537815      2      4.7200000
p-f      123.7727523      2      8.1421366
      19.5302280      2      4.6259863
      24.8051771      2      9.4500000
      4.1537815      2      4.7200000
d-f      48.3750223      2      6.6184148
      8.8920527      2      3.2487516
      24.8051771      2      9.4500000
      4.1537815      2      4.7200000
*
*
tc def2-TZVP
# tc      (7s7p5d1f) / [6s4p3d1f]      {211111/4111/311/1}
*
  2 s
  15.000000000      -0.19945408941
  12.910581694      0.33689922245
  1 s
  4.4493321158      1.0000000000
  1 s
  1.0548409451      1.0000000000
  1 s
  0.47909677246      1.0000000000
  1 s
  0.99124162989E-01      1.0000000000
  1 s
  0.36882799789E-01      1.0000000000
  4 p
  10.027138011      0.61481602710E-01
  5.8463419741      -0.23600729385
  1.4968345491      0.47746483995
  0.72934632066      0.50731543496
  1 p
  0.33913558879      1.0000000000
  1 p
  0.11000000000      1.0000000000
  1 p
  0.35000000000E-01      1.0000000000
  3 d
  5.0906268699      -0.32176405405E-01
  2.0156178510      0.21280802536
  0.88113887240      0.44403309175
  1 d
  0.36427094833      1.0000000000
  1 d

```

```

0.13678402297      1.0000000000
 1 f
0.79085000000     1.0000000000
*
tc def2-ecp
*
  ncore =      28          lmax =      3
#   coefficient   r^n      exponent
f
    -26.5624475    2        10.4000000
    -4.5856805    2         5.2000000
s-f
    195.1591659    2        10.4223462
    28.0926033    2         5.0365160
    26.5624475    2        10.4000000
    4.5856805     2         5.2000000
p-f
    135.2845662    2         8.9504494
    21.8065043    2         4.8544394
    26.5624475    2        10.4000000
    4.5856805     2         5.2000000
d-f
    54.3297294    2         6.9456968
    11.1550679    2         3.9705849
    26.5624475    2        10.4000000
    4.5856805     2         5.2000000
*
*
ru def2-TZVP
# ru   (7s7p5d1f) / [6s4p3d1f]   {211111/4111/311/1}
*
  2 s
16.000000000     -0.20634002919
13.910581694     0.33550437725
  1 s
4.7967971407     1.00000000000
  1 s
1.1555425594     1.00000000000
  1 s
0.52455741182     1.00000000000
  1 s
0.10734572646     1.00000000000
  1 s
0.39432760192E-01 1.00000000000
  4 p
11.187208671     0.53225073263E-01
 6.2477688734    -0.22731662050
 1.6279472859     0.47869486056
0.79326493538     0.50213311567
  1 p
0.36707276865     1.00000000000
  1 p
0.11500000000     1.00000000000
  1 p
0.37000000000E-01 1.00000000000
  3 d
 5.7341846619    -0.35266111560E-01
 2.2483686294     0.21802502222
0.98376978359     0.44709565013
  1 d

```

```

0.40379445583      1.0000000000
  1 d
0.14978618173      1.0000000000
  1 f
0.94314000000      1.0000000000
*
ru def2-ecp
*
  ncore =    28      lmax =    3
#      coefficient  r^n      exponent
f
      -28.3406163    2      11.3600000
      -4.9446292    2      5.6800000
s-f
      209.8229712    2      11.1052693
      30.6547264    2      5.4147454
      28.3406163    2      11.3600000
      4.9446292    2      5.6800000
p-f
      146.3361823    2      9.7712707
      24.1278772    2      5.0739908
      28.3406163    2      11.3600000
      4.9446292    2      5.6800000
d-f
      67.5158967    2      7.6714231
      9.8701041    2      4.1365647
      28.3406163    2      11.3600000
      4.9446292    2      5.6800000
*
*
rh def2-TZVP
# rh      (7s7p6d1f) / [6s4p3d1f]      {211111/4111/411/1}
*
  2 s
  17.000000000      -0.16690803139
  13.910581694      0.34235001652
  1 s
  5.2481265288      1.0000000000
  1 s
  1.2262575928      1.0000000000
  1 s
  0.53930216349      1.0000000000
  1 s
  0.10130730377      1.0000000000
  1 s
  0.37124139005E-01  1.0000000000
  4 p
  11.767103631      0.59494859388E-01
  6.7485133083      -0.23735853477
  1.7502679834      0.49019334303
  0.84321166133      0.50623933751
  1 p
  0.38295544759      1.0000000000
  1 p
  0.11500000000      1.0000000000
  1 p
  0.37000000000E-01  1.0000000000
  4 d
  19.857830136      0.66960778187E-02
  10.061378139      -0.21981738213E-01

```

```

2.2619546477      0.37918706236
0.97098845035      0.67289976592
  1 d
0.38391195297      1.0000000000
  1 d
0.13537026904      1.0000000000
  1 f
1.0949900000      1.0000000000
*
rh def2-ecp
*
  ncore =      28      lmax =      3
#      coefficient      r^n      exponent
f
      -30.0934557      2      12.3100000
      -5.2184819      2      6.1600000
s-f
      225.3477535      2      11.7200000
      32.8231890      2      5.8200000
      30.0934557      2      12.3100000
      5.2184819      2      6.1600000
p-f
      158.7094116      2      10.4200000
      26.4441005      2      5.4500000
      30.0934557      2      12.3100000
      5.2184819      2      6.1600000
d-f
      62.7586257      2      8.8200000
      10.9787195      2      3.8700000
      30.0934557      2      12.3100000
      5.2184819      2      6.1600000
*
*
pd def2-TZVP
# pd      (7s7p6d1f) / [6s4p3d1f]      {211111/4111/411/1}
*
  2 s
18.000000000      -0.16605388598
14.662134308      0.34899955055
  1 s
5.6388709265      1.0000000000
  1 s
1.3198953252      1.0000000000
  1 s
0.57817908509      1.0000000000
  1 s
0.10352166239      1.0000000000
  1 s
0.37548442674E-01      1.0000000000
  4 p
12.552899300      0.61728998206E-01
7.2444496380      -0.24178626753
1.8905941078      0.49453200915
0.90737168760      0.50454362626
  1 p
0.40877210813      1.0000000000
  1 p
0.11500000000      1.0000000000
  1 p
0.37000000000E-01      1.0000000000

```



```

4 d
22.357457575      0.39559479546E-02
10.682526382     -0.14039011601E-01
2.4858232550      0.24219476776
1.0735333903      0.42580283281
1 d
0.42613842853     1.00000000000
1 d
0.15046355385     1.00000000000
1 f
1.2462900000      1.00000000000
*
pd def2-ecp
*
ncore = 28          lmax = 3
# coefficient      r^n      exponent
f
-31.9295543       2        13.2700000
-5.3982169        2        6.6300000
s-f
240.2290403       2        12.4300000
35.1719435        2        6.1707594
31.9295543       2        13.2700000
5.3982169         2        6.6300000
p-f
170.4172760       2        11.0800000
28.4721329        2        5.8295541
31.9295543       2        13.2700000
5.3982169         2        6.6300000
d-f
69.0138449        2        9.5100000
11.7508616        2        4.1397811
31.9295543       2        13.2700000
5.3982169         2        6.6300000
*
*
ag def2-TZVP
# ag (7s7p6d1f) / [6s4p3d1f] {211111/4111/411/1}
*
2 s
19.000000000      -0.16600104141
15.428199933      0.35665095918
1 s
6.0553507268      1.00000000000
1 s
1.4162368935      1.00000000000
1 s
0.61758635858     1.00000000000
1 s
0.10474197431     1.00000000000
1 s
0.37685106264E-01 1.00000000000
4 p
13.188180180      0.66928737147E-01
7.7952789138      -0.24735235409
2.0351571912      0.49154280216
0.98093914842     0.49741609006
1 p
0.44451179958     1.00000000000
1 p

```

```

0.130000000000      1.0000000000
  1 p
0.412000000000E-01  1.0000000000
  4 d
 25.784397351      0.35645063082E-02
 11.396636755      -0.12984262784E-01
  2.7345581361      0.24108826548
  1.1873583605      0.42412330744
  1 d
0.47316910566      1.0000000000
  1 d
0.16746017986      1.0000000000
  1 f
  1.3971100000      1.0000000000
*
ag def2-ecp
*
  ncore =    28      lmax =    3
#      coefficient  r^n      exponent
f
      -33.6899201    2      14.2200000
      -5.5311202    2      7.1100000
s-f
      255.1393645    2      13.1300000
      36.8661215    2      6.5100000
      33.6899201    2      14.2200000
      5.5311202     2      7.1100000
p-f
      182.1818687    2      11.7400000
      30.3577515    2      6.2000000
      33.6899201    2      14.2200000
      5.5311202     2      7.1100000
d-f
      73.7192609     2      10.2100000
      12.5021171     2      4.3800000
      33.6899201     2      14.2200000
      5.5311202     2      7.1100000
*
*
cd def2-TZVP
# cd      (7s7p6d1f) / [6s4p3d1f]      {211111/4111/411/1}
*
  2 s
 20.0000000000      -0.17401196927
 16.309051661      0.37137277194
  1 s
  6.4512709901      1.0000000000
  1 s
  1.5350047390      1.0000000000
  1 s
0.68983631523      1.0000000000
  1 s
0.13475720977      1.0000000000
  1 s
0.47416874527E-01  1.0000000000
  4 p
 14.000681404      0.69333062793E-01
  8.3094019872      -0.25420103681
  2.2020058122      0.49200980368
  1.0779246137      0.49702118131

```

```

1 p
0.50111879846      1.0000000000
1 p
0.160000000000    1.0000000000
1 p
0.516000000000E-01  1.0000000000
4 d
30.380789793      0.32545123835E-02
11.474551578      -0.14212074843E-01
3.0507394903      0.24961756436
1.3622028524      0.44905635176
1 d
0.56399409888     1.0000000000
1 d
0.20916686535     1.0000000000
1 f
1.5981300000      1.0000000000
*
cd def2-ecp
*
ncore = 28          lmax = 3
# coefficient      r^n          exponent
f
-35.4766256       2            15.1847957
-5.6176768        2            7.5923978
s-f
270.0094832       2            13.8358689
38.7673080        2            6.8572704
35.4766256        2            15.1847957
5.6176768         2            7.5923978
p-f
193.8296294       2            12.4049710
31.8965252        2            6.5677995
35.4766256        2            15.1847957
5.6176768         2            7.5923978
d-f
79.1936470        2            10.8969253
13.2308267        2            4.6411649
35.4766256        2            15.1847957
5.6176768         2            7.5923978
*
*
in def2-TZVP
# in (10s9p8d2f) / [6s5p3d2f] {421111/33111/611/11}
*
4 s
847.79276774      0.12432052471E-03
72.041054824      0.23600367607E-02
41.061316522      -0.85588299453E-02
12.407609713      0.62952032489
2 s
11.640316941      1.5543429200
6.3695642727      0.67492488361
1 s
1.7063236353      1.0000000000
1 s
0.78666967936     1.0000000000
1 s
0.16965196873     1.0000000000
1 s

```

```

0.62074858667E-01  1.0000000000
  3 p
268.28136685      0.11542193636E-03
14.781553782     0.77779830292E-01
8.8041476194     -0.28332389472
  3 p
2.3717277227     0.47896111744
1.1927065422     0.48293819961
0.58352812041    0.16843883728
  1 p
0.23280968310    1.0000000000
  1 p
0.88674065208E-01 1.0000000000
  1 p
0.33598828267E-01 1.0000000000
  6 d
94.282575063     0.43652729696E-03
19.716431102     0.63918753088
19.600106824     -0.64663115577
3.5643186737     0.21187579614
1.7017801400     0.42129321741
0.76456615531    0.38418127707
  1 d
0.31826765584    1.0000000000
  1 d
0.10000000000    1.0000000000
  1 f
0.26415991000    1.0000000000
  1 f
0.90000000000    1.0000000000
*
in def2-ecp
*
  ncore =    28          lmax =    3
#   coefficient  r^n      exponent
f
   -13.7280780    2        12.5390560
   -18.2068660    2        12.5525610
s-f
   281.1223500    2        15.3928220
   61.9014700    2         8.0558640
   13.7280780    2        12.5390560
   18.2068660    2        12.5525610
p-f
   67.4621540    2        13.9286720
  134.9492500    2        13.3472340
   14.7461400    2         7.6141320
   29.6392620    2         7.3183650
   13.7280780    2        12.5390560
   18.2068660    2        12.5525610
d-f
   35.4932540    2        14.0347150
   53.1787730    2        14.5116160
    9.1772810    2         5.5505500
   12.3924100    2         5.0594150
   13.7280780    2        12.5390560
   18.2068660    2        12.5525610
*
*
sn def2-TZVP

```

# sn (10s9p8d2f) / [6s5p3d2f] {421111/331111/611/11}

```

*
  4 s
1577.0715931      0.17042767713E-03
235.26601078     0.81467057272E-03
38.206330645     -0.39057904293E-02
13.097031765     0.53245922343
  2 s
11.681492759     1.5435287275
5.9647604361     0.76421510041
  1 s
1.8891070740     1.0000000000
  1 s
0.88514080630     1.0000000000
  1 s
0.20500105152     1.0000000000
  1 s
0.76748551032E-01 1.0000000000
  3 p
221.55767496     0.31125177983E-03
21.084021433     0.31108097016E-01
8.7600138521     -0.27571560918
  3 p
2.5912909722     0.45912328666
1.3426801157     0.49682867217
0.67732735829     0.18962377821
  1 p
0.29418756752     1.0000000000
  1 p
0.11863762052     1.0000000000
  1 p
0.46215750632E-01 1.0000000000
  6 d
108.33210154     0.46561853277E-03
23.703936630     0.54063163067E-01
22.339843906     -0.58928768877E-01
4.0874834028     0.19588500896
1.9737354146     0.42301799185
0.90158257692     0.39252716176
  1 d
0.38237153649     1.0000000000
  1 d
0.12000000000     1.0000000000
  1 f
0.29392848500     1.0000000000
  1 f
1.00000000000     1.0000000000

```

\*  
sn def2-ecp

```

*
ncore = 28      lmax = 3
#      coefficient  r^n      exponent
f      -12.5763330   2        12.2823480
      -16.5959440   2        12.2721500
s-f    279.9886820   2        17.4204140
      62.3778100   2         7.6311550
      12.5763330   2        12.2823480
      16.5959440   2        12.2721500

```

|     |             |   |            |
|-----|-------------|---|------------|
| p-f | 66.1625230  | 2 | 16.1310240 |
|     | 132.1743960 | 2 | 15.6280770 |
|     | 16.3394170  | 2 | 7.3256080  |
|     | 32.4889590  | 2 | 6.9425190  |
|     | 12.5763330  | 2 | 12.2823480 |
|     | 16.5959440  | 2 | 12.2721500 |
| d-f | 36.3874410  | 2 | 15.5149760 |
|     | 54.5078410  | 2 | 15.1881600 |
|     | 8.6968230   | 2 | 5.4560240  |
|     | 12.8402080  | 2 | 5.3631050  |
|     | 12.5763330  | 2 | 12.2823480 |
|     | 16.5959440  | 2 | 12.2721500 |

\*

\*

sb def2-TZVP

# sb (10s9p8d2f) / [6s5p3d2f] {421111/33111/611/11}

\*

|                   |                    |  |
|-------------------|--------------------|--|
| 4 s               |                    |  |
| 1612.4199933      | 0.28540380783E-03  |  |
| 238.84452097      | 0.13393778746E-02  |  |
| 23.998118809      | -0.49388154574E-01 |  |
| 15.193124213      | 0.43392227254      |  |
| 2 s               |                    |  |
| 11.736409733      | 0.92125519965      |  |
| 6.5259774794      | 0.79235280226      |  |
| 1 s               |                    |  |
| 2.0247451872      | 1.0000000000       |  |
| 1 s               |                    |  |
| 0.97113418587     | 1.0000000000       |  |
| 1 s               |                    |  |
| 0.24254333998     | 1.0000000000       |  |
| 1 s               |                    |  |
| 0.92206608177E-01 | 1.0000000000       |  |
| 3 p               |                    |  |
| 215.68393354      | 0.26051823221E-03  |  |
| 16.374479088      | 0.73728000195E-01  |  |
| 9.7216283345      | -0.27230028128     |  |
| 3 p               |                    |  |
| 2.7982643154      | 0.46472692374      |  |
| 1.4711045033      | 0.50364242075      |  |
| 0.75165385301     | 0.18706666294      |  |
| 1 p               |                    |  |
| 0.33168699849     | 1.0000000000       |  |
| 1 p               |                    |  |
| 0.13931606366     | 1.0000000000       |  |
| 1 p               |                    |  |
| 0.56399307526E-01 | 1.0000000000       |  |
| 6 d               |                    |  |
| 115.90312253      | 0.53140915051E-03  |  |
| 30.474233720      | 0.59411139166E-02  |  |
| 18.228418239      | -0.10563706947E-01 |  |
| 4.3291456646      | 0.20348177341      |  |
| 2.1294818496      | 0.42748378928      |  |
| 0.99682636692     | 0.38539560809      |  |
| 1 d               |                    |  |
| 0.43347239863     | 1.0000000000       |  |
| 1 d               |                    |  |
| 0.14000000000     | 1.0000000000       |  |

```

1 f
0.32369706000      1.0000000000
1 f
1.10000000000      1.00000000000
*
sb def2-ecp
*
ncore =      28      lmax =      3
#      coefficient      r^n      exponent
f
      -15.3668010      2      14.4449780
      -20.2961380      2      14.4492950
s-f
      281.0715810      2      16.3308650
      61.7166040      2      8.5565420
      15.3668010      2      14.4449780
      20.2961380      2      14.4492950
p-f
      67.4573800      2      14.4703370
      134.9335030      2      13.8161940
      14.7163440      2      8.4249240
      29.5185120      2      8.0927280
      15.3668010      2      14.4449780
      20.2961380      2      14.4492950
d-f
      35.4478150      2      14.8863310
      53.1434660      2      15.1463190
      9.1792230      2      5.9082670
      13.2402530      2      5.5943220
      15.3668010      2      14.4449780
      20.2961380      2      14.4492950
*
*
te def2-TZVP
# te      (11s9p8d2f) / [6s5p3d2f]      {521111/33111/611/11}
*
5 s
6213.2001650      0.17392073280E-03
920.89640017      0.11933589842E-02
199.28042708      0.36256556777E-02
24.774233098      -0.59791033012E-01
14.838199169      0.95943203263
2 s
12.278761954      0.75942429936
6.3807845532      0.35331689542
1 s
2.2228405205      1.00000000000
1 s
1.0776043442      1.00000000000
1 s
0.28136649025      1.00000000000
1 s
0.10781573341      1.00000000000
3 p
204.29400852      0.40605406751E-03
18.208759358      0.60255451613E-01
9.9211024302      -0.27491671277
3 p
3.1441528685      0.43154849974
1.7220884031      0.55403079110

```

```

0.89098945714      0.24087311227
 1 p
0.39804719568      1.00000000000
 1 p
0.16538785242      1.00000000000
 1 p
0.65082695586E-01  1.00000000000
 6 d
121.51055249       0.63490629024E-03
32.968794396       0.61811936324E-02
19.249862451       -0.88929825218E-02
4.7198407254       0.20159884764
2.3428061416       0.42976049013
1.1135379412       0.38247126751
 1 d
0.49200061510      1.00000000000
 1 d
0.16000000000      1.00000000000
 1 f
0.38255757000      1.00000000000
 1 f
1.85000000000      1.00000000000
*
te def2-ecp
*
  ncore =    28          lmax =    3
#   coefficient   r^n      exponent
f
  -15.7454500     2         15.2061680
  -20.7424480     2         15.2017020
s-f
  281.0458430     2         16.8144730
   61.6206560     2          8.7935260
   15.7454500     2         15.2061680
   20.7424480     2         15.2017020
p-f
   67.4494640     2         14.8778010
  134.9043040     2         14.2697310
   14.6895470     2          8.7244350
   29.4150630     2          8.2915150
   15.7454500     2         15.2061680
   20.7424480     2         15.2017020
d-f
   35.4320570     2         15.2050080
   53.1356870     2         15.2258480
    9.0698020     2          6.0717690
   13.1223040     2          5.8047600
   15.7454500     2         15.2061680
   20.7424480     2         15.2017020
*
*
i def2-TZVP
# i      (11s10p8d2f) / [6s5p3d2f]      {521111/34111/611/11}
*
  5 s
5899.5791533       0.24188269271E-03
898.54238765       0.15474041742E-02
200.37237912       0.42836684457E-02
31.418053840       -0.39417936275E-01
15.645987838       0.96086691992

```



|                   |             |                    |            |
|-------------------|-------------|--------------------|------------|
| 2                 | s           |                    |            |
| 11.815741857      |             | 0.75961524091      |            |
| 6.4614458287      |             | 0.42495501835      |            |
| 1                 | s           |                    |            |
| 2.3838067579      |             | 1.0000000000       |            |
| 1                 | s           |                    |            |
| 1.1712089662      |             | 1.0000000000       |            |
| 1                 | s           |                    |            |
| 0.32115875757     |             | 1.0000000000       |            |
| 1                 | s           |                    |            |
| 0.12387919364     |             | 1.0000000000       |            |
| 3                 | p           |                    |            |
| 197.30030547      |             | 0.73951226905E-03  |            |
| 20.061411349      |             | 0.66168450008E-01  |            |
| 9.7631460485      |             | -0.28554662348     |            |
| 4                 | p           |                    |            |
| 12.984316904      |             | -0.49096186164E-01 |            |
| 3.6199503008      |             | 0.38914432482      |            |
| 2.0232273090      |             | 0.65610817262      |            |
| 1.0367490559      |             | 0.31803551647      |            |
| 1                 | p           |                    |            |
| 0.45937816000     |             | 1.0000000000       |            |
| 1                 | p           |                    |            |
| 0.19116532928     |             | 1.0000000000       |            |
| 1                 | p           |                    |            |
| 0.74878813023E-01 |             | 1.0000000000       |            |
| 6                 | d           |                    |            |
| 119.12671745      |             | 0.82596039573E-03  |            |
| 33.404240134      |             | 0.68377675770E-02  |            |
| 17.805918203      |             | -0.10308158997E-01 |            |
| 4.8990510353      |             | 0.22670457658      |            |
| 2.4516753106      |             | 0.44180113937      |            |
| 1.1820693432      |             | 0.36775472225      |            |
| 1                 | d           |                    |            |
| 0.52923110068     |             | 1.0000000000       |            |
| 1                 | d           |                    |            |
| 0.17000000000     |             | 1.0000000000       |            |
| 1                 | f           |                    |            |
| 0.44141808000     |             | 1.0000000000       |            |
| 1                 | f           |                    |            |
| 2.18000000000     |             | 1.0000000000       |            |
| *                 |             |                    |            |
| i                 | def2-ecp    |                    |            |
| *                 |             |                    |            |
| n                 | core =      | 28                 | lmax = 3   |
| #                 | coefficient | r^n                | exponent   |
| f                 |             |                    |            |
|                   | -21.8420400 | 2                  | 19.4586090 |
|                   | -28.4681910 | 2                  | 19.3492600 |
|                   | -0.2437130  | 2                  | 4.8237670  |
|                   | -0.3208040  | 2                  | 4.8843150  |
| s-f               |             |                    |            |
|                   | 49.9942930  | 2                  | 40.0158350 |
|                   | 281.0253170 | 2                  | 17.4297470 |
|                   | 61.5733260  | 2                  | 9.0054840  |
|                   | 21.8420400  | 2                  | 19.4586090 |
|                   | 28.4681910  | 2                  | 19.3492600 |
|                   | 0.2437130   | 2                  | 4.8237670  |
|                   | 0.3208040   | 2                  | 4.8843150  |
| p-f               |             |                    |            |

|                   |                           |   |                         |
|-------------------|---------------------------|---|-------------------------|
|                   | 67.4428410                | 2 | 15.3554660              |
|                   | 134.8811370               | 2 | 14.9718330              |
|                   | 14.6750510                | 2 | 8.9601640               |
|                   | 29.3756660                | 2 | 8.2590960               |
|                   | 21.8420400                | 2 | 19.4586090              |
|                   | 28.4681910                | 2 | 19.3492600              |
|                   | 0.2437130                 | 2 | 4.8237670               |
|                   | 0.3208040                 | 2 | 4.8843150               |
| d-f               |                           |   |                         |
|                   | 35.4395290                | 2 | 15.0689080              |
|                   | 53.1760570                | 2 | 14.5553220              |
|                   | 9.0671950                 | 2 | 6.7186470               |
|                   | 13.2069370                | 2 | 6.4563930               |
|                   | 0.0893350                 | 2 | 1.1917790               |
|                   | 0.0523800                 | 2 | 1.2911570               |
|                   | 21.8420400                | 2 | 19.4586090              |
|                   | 28.4681910                | 2 | 19.3492600              |
|                   | 0.2437130                 | 2 | 4.8237670               |
|                   | 0.3208040                 | 2 | 4.8843150               |
| *                 |                           |   |                         |
| *                 |                           |   |                         |
| xe def2-TZVP      |                           |   |                         |
| # xe              | (11s10p8d2f) / [6s5p3d2f] |   | {5211111/341111/611/11} |
| *                 |                           |   |                         |
| 5 s               |                           |   |                         |
| 6420.2481656      | 0.25092173886E-03         |   |                         |
| 983.54530664      | 0.16251948178E-02         |   |                         |
| 219.43881364      | 0.46037106451E-02         |   |                         |
| 23.012587807      | -0.14698707182            |   |                         |
| 18.048324490      | 0.57524870348             |   |                         |
| 2 s               |                           |   |                         |
| 11.752550163      | 0.66038420156             |   |                         |
| 6.2390917199      | 0.38470524721             |   |                         |
| 1 s               |                           |   |                         |
| 2.6257211320      | 1.0000000000              |   |                         |
| 1 s               |                           |   |                         |
| 1.2905042943      | 1.0000000000              |   |                         |
| 1 s               |                           |   |                         |
| 0.36204185060     | 1.0000000000              |   |                         |
| 1 s               |                           |   |                         |
| 0.14069888091     | 1.0000000000              |   |                         |
| 3 p               |                           |   |                         |
| 193.81432545      | 0.95394802497E-03         |   |                         |
| 21.725228086      | 0.57393353332E-01         |   |                         |
| 9.8891605641      | -0.27974266640            |   |                         |
| 4 p               |                           |   |                         |
| 13.960683826      | -0.50950157807E-01        |   |                         |
| 4.0928947097      | 0.36669211800             |   |                         |
| 2.2546815460      | 0.72619456861             |   |                         |
| 1.1546596184      | 0.35555871740             |   |                         |
| 1 p               |                           |   |                         |
| 0.52321923128     | 1.0000000000              |   |                         |
| 1 p               |                           |   |                         |
| 0.21945569800     | 1.0000000000              |   |                         |
| 1 p               |                           |   |                         |
| 0.86158996836E-01 | 1.0000000000              |   |                         |
| 6 d               |                           |   |                         |
| 135.60300038      | 0.81873543290E-03         |   |                         |
| 38.727062692      | 0.60897654151E-02         |   |                         |
| 15.377328089      | -0.92782985596E-02        |   |                         |

```

5.2602537686      0.22890785589
2.6590627424      0.44434407051
1.2938205124      0.36029482992
  1 d
0.58050830139     1.00000000000
  1 d
0.18000000000     1.00000000000
  1 f
0.49652793000     1.00000000000
  1 f
2.50000000000     1.00000000000
*
xe def2-ecp
*
  ncore =    28          lmax =    3
#   coefficient   r^n      exponent
f
  -23.0892950     2         20.8815570
  -30.0744750     2         20.7834430
   -0.2882270     2          5.2533890
   -0.3869240     2          5.3611880
s-f
  49.9979620     2         40.0051840
 281.0133030     2         17.8122140
  61.5382550     2          9.3041500
  23.0892950     2         20.8815570
  30.0744750     2         20.7834430
   0.2882270     2          5.2533890
   0.3869240     2          5.3611880
p-f
  67.4391420     2         15.7017720
 134.8747110     2         15.2586080
  14.6633000     2          9.2921840
  29.3547300     2          8.5590030
  23.0892950     2         20.8815570
  30.0744750     2         20.7834430
   0.2882270     2          5.2533890
   0.3869240     2          5.3611880
d-f
  35.4369080     2         15.1856000
  53.1957720     2         14.2845000
   9.0462320     2          7.1218890
  13.2236810     2          6.9919630
   0.0848530     2          0.6239460
   0.0441550     2          0.6472840
  23.0892950     2         20.8815570
  30.0744750     2         20.7834430
   0.2882270     2          5.2533890
   0.3869240     2          5.3611880
*
*
cs def2-TZVP
# cs      (7s6p3d) / [5s3p3d]      {31111/411/111}
*
  3 s
  5.8778113443     0.12859994983
  4.3631538286    -0.34632569725
  1.8048475155     0.69930637051
  1 s
0.37485237136     1.00000000000

```

```

1 s
0.16384858778      1.0000000000
1 s
0.27230462048E-01  1.0000000000
1 s
0.11991533212E-01  1.0000000000
4 p
4.2751856154      0.45723074174E-01
1.9656663360     -0.25019961976
0.47689195212     0.55660850066
0.21529749588     0.58218553406
1 p
0.91450850296E-01  1.0000000000
1 p
0.17592078473E-01  1.0000000000
1 d
0.27941471548     0.15040680034
1 d
0.62419809739E-01  0.36150912942
1 d
0.15987870156E-01  1.0000000000
*
cs def2-ecp
*
ncore =      46          lmax =      3
# coefficient  r^n      exponent
f
s-f
-28.8843090    2          3.1232690
84.5477300    2          4.0797500
16.6541730    2          2.4174060
28.8843090    2          3.1232690
p-f
157.0490590   2          5.5140800
26.4233070    2          2.1603160
28.8843090    2          3.1232690
d-f
13.1727530    2          1.8074100
3.3428330     2          0.8581820
28.8843090    2          3.1232690
*
*
ba def2-TZVP
# ba (7s7p5d1f) / [6s4p3d1f] {211111/4111/311/1}
*
2 s
6.0000000000    -0.56587174838
4.9822082226    0.97514768535
1 s
2.1451943914    1.0000000000
1 s
0.41486174100   1.0000000000
1 s
0.19214757016   1.0000000000
1 s
0.48465890337E-01  1.0000000000
1 s
0.20138298948E-01  1.0000000000
4 p
5.5000000000    -0.44586312998

```

```

4.9017938336      0.67755479813
2.6142685062     -0.46010554954
0.47903394983    0.68749608021
  1 p
0.19415138747    1.00000000000
  1 p
0.34917622027E-01  1.00000000000
  1 p
0.16320065666E-01  1.00000000000
  3 d
0.96631500000    -0.90893800000
0.89382800000    0.94724000000
0.27319500000    0.32205700000
  1 d
0.10389100000    1.00000000000
  1 d
0.35578000000E-01  1.00000000000
  1 f
0.65760000000    0.00000000000
*
ba def2-ecp
*
  ncore =      46          lmax =      3
#      coefficient      r^n      exponent
f
      -33.4731740      2          3.5894650
s-f
      427.8458160      2          9.5269860
      204.4175300      2          4.4875100
      33.4731740      2          3.5894650
p-f
      293.6058640      2          8.3159300
      294.1933160      2          4.2922170
      33.4731740      2          3.5894650
d-f
      112.5504020      2          5.9161080
      181.7826210      2          2.8748420
      33.4731740      2          3.5894650
*
*
la def2-TZVP
# la      (7s7p5d1f) / [6s4p3d1f]      {211111/4111/311/1}
*
  2 s
5.0873990000     -0.44174952534
4.2709780000     0.85812466843
  1 s
2.1823656045     1.00000000000
  1 s
0.48966533785     1.00000000000
  1 s
0.23301675348     1.00000000000
  1 s
0.55719523051E-01  1.00000000000
  1 s
0.22854708808E-01  1.00000000000
  4 p
6.0000000000     -0.11397960924E-01
3.6808191615     0.14675038550
2.3265462081     -0.35581819167

```

```

0.64342629633      0.45834955229
  1 p
0.33584281962      1.00000000000
  1 p
0.16519051916      1.00000000000
  1 p
0.35400000000E-01  1.00000000000
  3 d
  1.2675288018     -0.17569274035
0.89395340284      0.25139922933
0.33095767339      0.44603267053
  1 d
0.13461377501      1.00000000000
  1 d
0.51441629839E-01  1.00000000000
  1 f
0.25683000000      1.00000000000
*
la def2-ecp
*
  ncore =    46      lmax =    3
#      coefficient  r^n      exponent
f
s-f      -36.0100160    2      4.0286000
          91.9321770    2      3.3099000
          -3.7887640    2      1.6550000
          36.0100160    2      4.0286000
p-f
          63.7594860    2      2.8368000
          -0.6479580    2      1.4184000
          36.0100160    2      4.0286000
d-f
          36.1161730    2      2.0213000
          0.2191140    2      1.0107000
          36.0100160    2      4.0286000
*
*
hf def2-TZVP
# hf      (9s7p5d1f) / [6s4p3d1f]      {411111/4111/311/1}
*
  4 s
24.000000000      0.19369448644
16.000000000      -3.5064630782
14.400000000      4.3082581000
10.304504667      -0.91045809742
  1 s
  3.8426510824      1.00000000000
  1 s
0.93296029049      1.00000000000
  1 s
0.42615320942      1.00000000000
  1 s
0.93366560195E-01  1.00000000000
  1 s
0.35532895141E-01  1.00000000000
  4 p
17.000000000      -0.30316491880E-01
11.738072097      0.10139279686
  4.9203967161      -0.28227924657

```

```

1.1251726138      0.52032008501
 1 p
0.54220114055      1.00000000000
 1 p
0.25659447877      1.00000000000
 1 p
0.650000000000E-01  1.00000000000
 3 d
 3.9820623229      -0.42446023944E-01
 1.3077987772      0.18409232564
0.53272310298      0.41484423516
 1 d
0.20564954488      1.00000000000
 1 d
0.73099858787E-01  1.00000000000
 1 f
0.31547000000      1.00000000000
*
hf def2-ecp
*
  ncore =    60      lmax =    3
#      coefficient  r^n      exponent
f
      10.0467225    2      1.7857698
s-f
      1499.2847107  2      14.7699590
      40.2821014    2      7.3849794
      -10.0467225   2      1.7857698
p-f
      397.7330053    2      9.8494895
      19.3164059    2      4.9247445
      -10.0467225   2      1.7857698
d-f
      101.3298053    2      6.0967564
      5.8734382     2      3.0483782
      -10.0467225   2      1.7857698
*
*
ta def2-TZVP
# ta      (9s7p5d1f) / [6s4p3d1f]      {411111/4111/311/1}
*
 4 s
24.473650944      0.20590322488
18.721372549      -0.74670795514
11.500000000      3.4071363897
10.350000000      -2.8175487609
 1 s
 3.8436180089      1.00000000000
 1 s
 1.0202266016      1.00000000000
 1 s
0.46774781869      1.00000000000
 1 s
0.10323186670      1.00000000000
 1 s
0.38674461203E-01  1.00000000000
 4 p
17.000000000      -0.32577305616E-01
12.008186536      0.10336287365
 5.0278760583      -0.28526521696

```

```

1.1937124184      0.51790141155
 1 p
0.57889707053      1.00000000000
 1 p
0.27225198801      1.00000000000
 1 p
0.650000000000E-01  1.00000000000
 3 d
 3.9738796278      -0.52799310714E-01
 1.4528884813      0.18558319471
0.61042908544      0.42959071631
 1 d
0.24216276510      1.00000000000
 1 d
0.87909318337E-01  1.00000000000
 1 f
0.37386000000      1.00000000000
*
ta def2-ecp
*
  ncore =    60          lmax =    3
#      coefficient      r^n      exponent
f
      12.0179609      2          2.0178811
s-f
      1345.8806470      2          14.5464077
      36.7668062      2          7.2732038
      -12.0179609      2          2.0178811
p-f
      378.4253015      2          9.9355653
      22.2930909      2          4.9677824
      -12.0179609      2          2.0178811
d-f
      104.8839557      2          6.3473769
      8.7558481      2          3.1736885
      -12.0179609      2          2.0178811
*
*
w def2-TZVP
# w      (8s7p6d1f) / [6s4p3d1f]      {311111/4111/411/1}
*
 3 s
30.000000000      0.32246483410
27.000000000      -0.46692257214
13.078045684      0.42699563776
 1 s
 4.8100449717      1.00000000000
 1 s
0.98497804263      1.00000000000
 1 s
0.44910485344      1.00000000000
 1 s
0.11448352920      1.00000000000
 1 s
0.41720421956E-01  1.00000000000
 4 p
17.000000000      -0.37817768433E-01
12.431973432      0.10905673845
 5.1586217658      -0.29399955020
 1.2801454812      0.51560726697

```



```

1 p
0.62856790898      1.0000000000
1 p
0.29380423553      1.0000000000
1 p
0.650000000000E-01  1.0000000000
4 d
7.4064737315      0.86993963018E-01
5.9026268603      -0.17667540011
1.2984756750      0.55145697030
0.57153508541     0.95313596535
1 d
0.23845526606     1.0000000000
1 d
0.91144267331E-01  1.0000000000
1 f
0.43199000000     1.0000000000
*
w def2-ecp
*
ncore = 60          lmax = 3
# coefficient      r^n          exponent
f
14.1525795        2            2.2588885
s-f
1192.3958823      2            14.3228564
32.5229332        2            7.1614281
-14.1525795       2            2.2588885
p-f
359.0319671       2            10.0216411
24.0303802        2            5.0108204
-14.1525795       2            2.2588885
d-f
108.3013490       2            6.5979974
10.9825283        2            3.2989987
-14.1525795       2            2.2588885
*
*
re def2-TZVP
# re (8s7p6d1f) / [6s4p3d1f] {311111/4111/411/1}
*
3 s
30.000000000      0.31780717811
27.000000000      -0.46492321332
13.078045684      0.45723641305
1 s
5.0352712861     1.0000000000
1 s
1.0482706438     1.0000000000
1 s
0.47708773413    1.0000000000
1 s
0.12225857255    1.0000000000
1 s
0.44007400609E-01 1.0000000000
4 p
18.000000000     -0.26890962397E-01
12.318606250     0.99711498502E-01
5.3719234505     -0.29289398145
1.3506646748     0.51466301434

```

```

1 p
0.66212816808      1.0000000000
1 p
0.31071385193      1.0000000000
1 p
0.700000000000E-01  1.0000000000
4 d
7.7352877672      0.83901798556E-01
6.0949443610      -0.17722258734
1.3871105497      0.55238259692
0.62324027854      0.91980111239
1 d
0.26517328547      1.0000000000
1 d
0.10321096849      1.0000000000
1 f
0.48989000000      1.0000000000
*
re def2-ecp
*
ncore =      60      lmax =      3
#      coefficient      r^n      exponent
f
      16.4498523      2      2.5086506
s-f
      1038.9515723      2      14.0993051
      29.5617383      2      7.0496525
      -16.4498523      2      2.5086506
p-f
      339.5435096      2      10.1077169
      24.9136965      2      5.0538583
      -16.4498523      2      2.5086506
d-f
      111.6996527      2      6.8486179
      12.6243293      2      3.4243090
      -16.4498523      2      2.5086506
*
*
os def2-TZVP
# os      (8s7p6d1f) / [6s4p3d1f]      {311111/4111/411/1}
*
3 s
30.000000000      0.32213004804
27.000000000      -0.47922918137
13.524730005      0.47465946837
1 s
5.2402883472      1.0000000000
1 s
1.1306661245      1.0000000000
1 s
0.51689966917      1.0000000000
1 s
0.13222953545      1.0000000000
1 s
0.47220318801E-01  1.0000000000
4 p
15.500000000      0.16016463376
14.000000000      -0.23201520402
5.5458290420      0.29772587274
1.4139502215      -0.54253238176

```

```

1 p
0.68136686765      1.0000000000
1 p
0.30911452647      1.0000000000
1 p
0.520000000000E-01  1.0000000000
4 d
8.2945059487      0.69648222110E-01
6.3060397430      -0.16444229630
1.4890109110      0.55154541033
0.67315390607      0.88461370291
1 d
0.28590805222      1.0000000000
1 d
0.11058012051      1.0000000000
1 f
0.55065000000      1.0000000000
*
os def2-ecp
*
ncore = 60          lmax = 3
# coefficient      r^n      exponent
f
      18.9094570      2          2.7670751
s-f
      885.4057191      2          13.8757539
      25.9670401      2          6.9378769
      -18.9094570      2          2.7670751
p-f
      320.0839019      2          10.1937926
      26.1487649      2          5.0968962
      -18.9094570      2          2.7670751
d-f
      115.0448431      2          7.0992385
      13.6225746      2          3.5496192
      -18.9094570      2          2.7670751
*
*
ir def2-TZVP
# ir      (8s7p6d1f) / [6s4p3d1f]      {311111/4111/411/1}
*
3 s
30.000000000      0.30797903228
27.000000000      -0.46726361781
13.961973911      0.47161003146
1 s
5.3956977802      1.0000000000
1 s
1.2149128721      1.0000000000
1 s
0.55885743756      1.0000000000
1 s
0.14097974313      1.0000000000
1 s
0.50021924989E-01  1.0000000000
4 p
15.902664143      -0.16290720099
14.415830698      0.23483212987
5.7597608991      -0.30305337176
1.5008913108      0.55512982069

```

```

1 p
0.72348035957      1.0000000000
1 p
0.32785980328      1.0000000000
1 p
0.560000000000E-01  1.0000000000
4 d
8.6321692504      0.75000099949E-01
6.5898192302     -0.17326965173
1.5808379663      0.55065196913
0.71827834905      0.85273641436
1 d
0.30571851998      1.0000000000
1 d
0.11827071879      1.0000000000
1 f
0.61008000000      1.0000000000
*
ir def2-ecp
*
ncore =      60      lmax =      3
#      coefficient      r^n      exponent
f
      21.5310311      2      3.0340719
s-f
      732.2691998      2      13.6522026
      26.4847209      2      6.8261013
      -21.5310311      2      3.0340719
p-f
      299.4894736      2      10.2798684
      26.4662335      2      5.1399341
      -21.5310311      2      3.0340719
d-f
      124.4575945      2      7.3498590
      14.0359952      2      3.6749295
      -21.5310311      2      3.0340719
*
*
pt def2-TZVP
# pt      (8s7p6d1f) / [6s4p3d1f]      {311111/4111/411/1}
*
3 s
30.000000000      0.27148263900
27.000000000      -0.42226758774
14.408318564      0.44361581995
1 s
5.5335788010      1.0000000000
1 s
1.2986438223      1.0000000000
1 s
0.58759393108      1.0000000000
1 s
0.13845587261      1.0000000000
1 s
0.49204459888E-01  1.0000000000
4 p
15.500000000      -0.15672718629
14.000000000      0.23853412989
6.1161212339      -0.31041379733
1.5715586385      0.56473525089

```

```

1 p
0.75132510781      1.0000000000
1 p
0.33306466812      1.0000000000
1 p
0.570000000000E-01  1.0000000000
4 d
8.3207937611      0.62945798646E-01
7.4207226520      -0.90271847072E-01
1.6570410639      0.16812526416
0.73943569960      0.25045416970
1 d
0.30510856008      1.0000000000
1 d
0.11350405268      1.0000000000
1 f
0.66813000000      1.0000000000
*
pt def2-ecp
*
ncore = 60          lmax = 3
# coefficient      r^n          exponent
f
      24.3143757      2          3.3095686
s-f
      579.2238609      2          13.4286513
      29.6694906      2          6.7143256
      -24.3143757      2          3.3095686
p-f
      280.8607742      2          10.3659442
      26.7453820      2          5.1829721
      -24.3143757      2          3.3095686
d-f
      120.3964443      2          7.6004795
      15.8109206      2          3.8002397
      -24.3143757      2          3.3095686
*
*
au def2-TZVP
# au      (8s7p6d1f) / [6s4p3d1f]      {311111/4111/411/1}
*
3 s
30.000000000      0.20749231108
27.000000000      -0.33267893394
14.746824331      0.38302817958
1 s
5.6017248938      1.0000000000
1 s
1.3874162443      1.0000000000
1 s
0.62923031957      1.0000000000
1 s
0.14027517613      1.0000000000
1 s
0.49379413761E-01  1.0000000000
4 p
15.500000000      0.15001711880
14.000000000      -0.23609813183
6.4227368205      0.31458896948
1.6595601681      -0.57279670446

```

```

1 p
0.79402913993      1.0000000000
1 p
0.35125155397      1.0000000000
1 p
0.450000000000E-01  1.0000000000
4 d
9.5524098656      0.40145559502E-01
7.2698886937      -0.93690906606E-01
1.7746496789      0.31746282317
0.79960541055      0.46795192483
1 d
0.33252279372      1.0000000000
1 d
0.12445133105      1.0000000000
1 f
0.72482000000      1.0000000000
*
au def2-ecp
*
ncore = 60          lmax = 3
# coefficient      r^n          exponent
f
30.4900889        2            4.7898200
5.1710738         2            2.3949100
s-f
426.8466792       2            13.2051000
37.0070829        2            6.6025500
-30.4900889       2            4.7898200
-5.1710738        2            2.3949100
p-f
261.1995804       2            10.4520200
26.9624960        2            5.2260100
-30.4900889       2            4.7898200
-5.1710738        2            2.3949100
d-f
124.7906656       2            7.8511000
16.3007257        2            3.9255500
-30.4900889       2            4.7898200
-5.1710738        2            2.3949100
*
*
hg def2-TZVP
# hg (8s8p6d1f) / [6s5p3d1f] {311111/41111/411/1}
*
3 s
48.013786990      0.58008164912E-02
21.239875095      -0.17328165235
15.876100879      0.36416685034
1 s
5.5180531820      1.0000000000
1 s
1.5099145479      1.0000000000
1 s
0.70683482159     1.0000000000
1 s
0.16266265576     1.0000000000
1 s
0.56960589112E-01 1.0000000000
4 p

```

```

17.500000000    -0.86457187331E-01
15.252594855    0.15327318234
6.4404715169    -0.30274955249
1.8180159920    0.54361285026
 1 p
0.90067981801    1.0000000000
 1 p
0.41304540122    1.0000000000
 1 p
0.11845702655    1.0000000000
 1 p
0.36087619349E-01  1.0000000000
 4 d
10.028197701    0.39922353165E-01
7.5920661493    -0.94774230522E-01
1.9144256118    0.31164157463
0.88641552102    0.45567078406
 1 d
0.38154235320    1.0000000000
 1 d
0.14880740086    1.0000000000
 1 f
0.79569000000    1.0000000000
*
hg def2-ecp
*
  ncore =    60          lmax =    3
#      coefficient      r^n      exponent
f
      30.3649964        2          3.8857911
s-f
      275.7372117        2          12.9815487
      49.0892125         2           6.4907744
      -30.3649964        2          3.8857911
p-f
      241.5400740        2          10.5380958
      27.3965908         2           5.2690479
      -30.3649964        2          3.8857911
d-f
      127.8670076        2           8.1017205
      16.6083115         2           4.0508603
      -30.3649964        2          3.8857911
*
*
t1 def2-TZVP
# t1      (10s9p8d2f) / [6s5p3d2f]      {421111/33111/611/11}
*
 4 s
729.65038145    0.13672829828E-03
46.665548707    0.60443439951E-02
20.970448726    -0.20022066697
14.149588677    0.40801678488
 2 s
20.730134285    -0.71861135918E-01
6.1527631309    0.98057508445
 1 s
1.5757324480    1.0000000000
 1 s
0.74980169458    1.0000000000
 1 s

```

|                   |                    |
|-------------------|--------------------|
| 0.19536816194     | 1.0000000000       |
| 1 s               |                    |
| 0.70878767298E-01 | 1.0000000000       |
| 3 p               |                    |
| 15.383852616      | 0.61717949180      |
| 14.814929544      | -0.72859235151     |
| 6.7261253658      | 0.40438195364      |
| 3 p               |                    |
| 1.9626182149      | 0.43157661160      |
| 1.0331857851      | 0.39230403853      |
| 0.53837445996     | 0.14007406820      |
| 1 p               |                    |
| 0.24446611676     | 1.0000000000       |
| 1 p               |                    |
| 0.90785377260E-01 | 1.0000000000       |
| 1 p               |                    |
| 0.33401321498E-01 | 1.0000000000       |
| 6 d               |                    |
| 57.606819928      | 0.16054811114E-03  |
| 9.7368866667      | 0.24456562496E-01  |
| 6.9256201679      | -0.69914775031E-01 |
| 2.1396230731      | 0.19496269490      |
| 1.0836187110      | 0.29731629705      |
| 0.52356298209     | 0.23728708102      |
| 1 d               |                    |
| 0.23842309375     | 1.0000000000       |
| 1 d               |                    |
| 0.95000000000E-01 | 1.0000000000       |
| 1 f               |                    |
| 0.28435000000     | 1.0000000000       |
| 1 f               |                    |
| 0.95000000000     | 1.0000000000       |

\*

tl def2-ecp

\*

| #   | ncore = 60 | coefficient | lmax = 3 | r^n | exponent   |
|-----|------------|-------------|----------|-----|------------|
| f   |            | 15.8254880  | 2        |     | 5.6263990  |
|     |            | 21.1040210  | 2        |     | 5.5489520  |
|     |            | 2.9151270   | 2        |     | 2.8749460  |
|     |            | 3.8969030   | 2        |     | 2.8214510  |
| s-f |            | 281.2846630 | 2        |     | 12.1678050 |
|     |            | 62.4342510  | 2        |     | 8.2949090  |
|     |            | -15.8254880 | 2        |     | 5.6263990  |
|     |            | -21.1040210 | 2        |     | 5.5489520  |
|     |            | -2.9151270  | 2        |     | 2.8749460  |
|     |            | -3.8969030  | 2        |     | 2.8214510  |
| p-f |            | 4.6334080   | 2        |     | 7.1514920  |
|     |            | 9.3417560   | 2        |     | 5.1728650  |
|     |            | 72.2992530  | 2        |     | 9.8910720  |
|     |            | 144.5580370 | 2        |     | 9.0033910  |
|     |            | -15.8254880 | 2        |     | 5.6263990  |
|     |            | -21.1040210 | 2        |     | 5.5489520  |
|     |            | -2.9151270  | 2        |     | 2.8749460  |
|     |            | -3.8969030  | 2        |     | 2.8214510  |
| d-f |            | 35.9430390  | 2        |     | 7.1302180  |



|             |   |           |
|-------------|---|-----------|
| 53.9095930  | 2 | 6.9269060 |
| 10.3819390  | 2 | 5.4175700 |
| 15.5838220  | 2 | 5.1386810 |
| -15.8254880 | 2 | 5.6263990 |
| -21.1040210 | 2 | 5.5489520 |
| -2.9151270  | 2 | 2.8749460 |
| -3.8969030  | 2 | 2.8214510 |

\*  
\*

pb def2-TZVP

# pb (10s9p8d2f) / [6s5p3d2f] {421111/331111/611/11}

\*

|                   |                    |  |
|-------------------|--------------------|--|
| 4 s               |                    |  |
| 591.61124370      | 0.22126521076E-03  |  |
| 46.757232559      | 0.56961959130E-02  |  |
| 20.746462696      | -0.21374063831     |  |
| 14.610796419      | 0.40502620616      |  |
| 2 s               |                    |  |
| 20.222637612      | -0.83541883299E-01 |  |
| 6.4767324865      | 0.97910892388      |  |
| 1 s               |                    |  |
| 1.6600600927      | 1.0000000000       |  |
| 1 s               |                    |  |
| 0.80431655001     | 1.0000000000       |  |
| 1 s               |                    |  |
| 0.22627039020     | 1.0000000000       |  |
| 1 s               |                    |  |
| 0.84014530665E-01 | 1.0000000000       |  |
| 3 p               |                    |  |
| 15.189102118      | 0.61952303583      |  |
| 14.693144415      | -0.72498497086     |  |
| 6.8705890048      | 0.37680007984      |  |
| 3 p               |                    |  |
| 2.2021426123      | 0.40196284806      |  |
| 1.2209125119      | 0.46058131862      |  |
| 0.63367559815     | 0.19367655397      |  |
| 1 p               |                    |  |
| 0.28202837058     | 1.0000000000       |  |
| 1 p               |                    |  |
| 0.11333375666     | 1.0000000000       |  |
| 1 p               |                    |  |
| 0.43948707430E-01 | 1.0000000000       |  |
| 6 d               |                    |  |
| 61.315369628      | 0.33870800787E-03  |  |
| 12.372195840      | 0.13788683942E-01  |  |
| 6.9254944983      | -0.75979608103E-01 |  |
| 2.3319539939      | 0.28113784298      |  |
| 1.2108730003      | 0.44474512269      |  |
| 0.60090478506     | 0.35326874351      |  |
| 1 d               |                    |  |
| 0.28135869813     | 1.0000000000       |  |
| 1 d               |                    |  |
| 0.11500000000     | 1.0000000000       |  |
| 1 f               |                    |  |
| 0.28962000000     | 1.0000000000       |  |
| 1 f               |                    |  |
| 1.0000000000      | 1.0000000000       |  |

\*

pb def2-ecp

\*

```

ncore = 60          lmax = 3
#      coefficient  r^n    exponent
f
      12.2098920    2      3.8875120
      16.1902910    2      3.8119630
s-f
      281.2854990   2      12.2963030
      62.5202170   2      8.6326340
      -12.2098920   2      3.8875120
      -16.1902910   2      3.8119630
p-f
      72.2768970    2      10.2417900
      144.5910830   2      8.9241760
      4.7586930     2      6.5813420
      9.9406210     2      6.2554030
      -12.2098920   2      3.8875120
      -16.1902910   2      3.8119630
d-f
      35.8485070    2      7.7543360
      53.7243420    2      7.7202810
      10.1152560    2      4.9702640
      14.8337310    2      4.5637890
      -12.2098920   2      3.8875120
      -16.1902910   2      3.8119630
*
*
bi def2-TZVP
# bi      (10s9p8d2f) / [6s5p3d2f]      {4211111/331111/611/11}
*
  4 s
  716.41435310      0.31254307133E-03
  83.806059047      0.17624768946E-02
  21.116962853      -0.21910983437
  15.491448187      0.40411224931
  2 s
  23.239855029      -0.68255758685E-01
  6.6474255000      0.97888046471
  1 s
  1.7617744005      1.0000000000
  1 s
  0.87252866000     1.0000000000
  1 s
  0.25618895997     1.0000000000
  1 s
  0.97073913006E-01 1.0000000000
  3 p
  15.249644669      0.74560356000
  14.846176053      -0.85578637338
  7.0636826784      0.40149159592
  3 p
  2.5881255616      0.35542729633
  1.5020208499      0.63976991890
  0.76732724388     0.32332773839
  1 p
  0.32797648982     1.0000000000
  1 p
  0.13820335991     1.0000000000
  1 p
  0.55137330969E-01 1.0000000000
  6 d

```

```

66.404481948      0.38102878348E-03
13.858426961      0.10746152442E-01
7.0654519000     -0.71947646845E-01
2.5252144035      0.26195974989
1.3419585000      0.42594750000
0.68340941000     0.33680325627
  1 d
0.32934755420     1.00000000000
  1 d
0.14000000000     1.00000000000
  1 f
0.31271000000     1.00000000000
  1 f
1.05000000000     1.00000000000
*
bi def2-ecp
*
  ncore =      60      lmax =      3
#      coefficient      r^n      exponent
f
      13.7133830      2      4.2145460
      18.1943080      2      4.1334000
s-f
      283.2642270      2      13.0430900
      62.4719590      2      8.2216820
      -13.7133830      2      4.2145460
      -18.1943080      2      4.1334000
p-f
      72.0014990      2      10.4677770
      144.0022770      2      9.1189010
      5.0079450      2      6.7547910
      9.9915500      2      6.2525920
      -13.7133830      2      4.2145460
      -18.1943080      2      4.1334000
d-f
      36.3962590      2      8.0814740
      54.5976640      2      7.8905950
      9.9842940      2      4.9555560
      14.9814850      2      4.7045590
      -13.7133830      2      4.2145460
      -18.1943080      2      4.1334000
*
*
po def2-TZVP
# po      (11s10p8d2f) / [6s5p3d2f]      {521111/34111/611/11}
*
  5 s
6744.8211765      0.76891556363E-04
744.41892532      0.71284827354E-03
131.04029309      0.22057583958E-02
19.662021030     -0.64364713744
16.623025609      0.91997150546
  2 s
23.094002965     -0.70404410177E-01
6.9707398381      0.97886540086
  1 s
1.8497377593      1.00000000000
  1 s
0.93082999263      1.00000000000
  1 s

```

|                   |                    |
|-------------------|--------------------|
| 0.28673026462     | 1.0000000000       |
| 1 s               |                    |
| 0.10979212169     | 1.0000000000       |
| 3 p               |                    |
| 253.99024497      | 0.83876362116E-04  |
| 9.8712718748      | 0.24572710458      |
| 7.4489893496      | -0.44297763661     |
| 4 p               |                    |
| 8.9027395407      | -0.13798250445     |
| 5.7414667465      | 0.26304005326      |
| 1.9896329823      | 0.66225846161      |
| 0.94703210822     | 0.39547051892      |
| 1 p               |                    |
| 0.37071136280     | 1.0000000000       |
| 1 p               |                    |
| 0.15554706086     | 1.0000000000       |
| 1 p               |                    |
| 0.61173720818E-01 | 1.0000000000       |
| 6 d               |                    |
| 67.943077046      | 0.48919125336E-03  |
| 14.914219894      | 0.10157120776E-01  |
| 7.2973948305      | -0.69943263066E-01 |
| 2.6826784400      | 0.26244730680      |
| 1.4374143009      | 0.42702361494      |
| 0.73903797417     | 0.32502435477      |
| 1 d               |                    |
| 0.35838153281     | 1.0000000000       |
| 1 d               |                    |
| 0.15000000000     | 1.0000000000       |
| 1 f               |                    |
| 0.33275000000     | 1.0000000000       |
| 1 f               |                    |
| 1.40000000000     | 1.0000000000       |

\*

po def2-ecp

\*

| #   | ncore = 60 | lmax = 3 | coefficient | r^n | exponent   |
|-----|------------|----------|-------------|-----|------------|
| f   |            |          | 17.4282950  | 2   | 5.0132700  |
|     |            |          | 23.3803530  | 2   | 4.9846400  |
|     |            |          | 0.1633920   | 2   | 1.3267600  |
|     |            |          | 0.3245660   | 2   | 1.5287580  |
| s-f |            |          | 283.2447060 | 2   | 13.2772270 |
|     |            |          | 62.3964610  | 2   | 8.3995180  |
|     |            |          | -17.4282950 | 2   | 5.0132700  |
|     |            |          | -23.3803530 | 2   | 4.9846400  |
|     |            |          | -0.1633920  | 2   | 1.3267600  |
|     |            |          | -0.3245660  | 2   | 1.5287580  |
| p-f |            |          | 71.9917160  | 2   | 10.6656820 |
|     |            |          | 143.9718710 | 2   | 9.2837530  |
|     |            |          | 4.9496150   | 2   | 6.8727490  |
|     |            |          | 9.7404990   | 2   | 6.3261500  |
|     |            |          | -17.4282950 | 2   | 5.0132700  |
|     |            |          | -23.3803530 | 2   | 4.9846400  |
|     |            |          | -0.1633920  | 2   | 1.3267600  |
|     |            |          | -0.3245660  | 2   | 1.5287580  |
| d-f |            |          |             |     |            |

|             |   |           |
|-------------|---|-----------|
| 36.3783830  | 2 | 8.2148660 |
| 54.5627150  | 2 | 8.0086960 |
| 9.8894990   | 2 | 5.0552270 |
| 14.6938770  | 2 | 4.7825530 |
| -17.4282950 | 2 | 5.0132700 |
| -23.3803530 | 2 | 4.9846400 |
| -0.1633920  | 2 | 1.3267600 |
| -0.3245660  | 2 | 1.5287580 |

\*

\*

at def2-TZVP

# at (11s10p8d2f) / [6s5p3d2f] {521111/34111/611/11}

\*

|                   |                    |
|-------------------|--------------------|
| 5 s               |                    |
| 3635.9809356      | 0.12571463494E-03  |
| 537.64129823      | 0.75950883820E-03  |
| 91.600030756      | 0.25790982348E-02  |
| 20.200005804      | -0.54772187699     |
| 16.893873824      | 0.78417507786      |
| 2 s               |                    |
| 18.177216938      | -0.13023627002     |
| 7.2317852082      | 0.96473566747      |
| 1 s               |                    |
| 1.9496199739      | 1.0000000000       |
| 1 s               |                    |
| 0.99226695236     | 1.0000000000       |
| 1 s               |                    |
| 0.31957178881     | 1.0000000000       |
| 1 s               |                    |
| 0.12342539809     | 1.0000000000       |
| 3 p               |                    |
| 216.81518928      | 0.16975297090E-03  |
| 10.592298115      | 0.22683755793      |
| 7.4596585430      | -0.47336848377     |
| 4 p               |                    |
| 8.9484156471      | -0.15012953475     |
| 5.9694592464      | 0.27048141788      |
| 2.1099088209      | 0.63671217722      |
| 1.0236370373      | 0.38057472615      |
| 1 p               |                    |
| 0.42186356565     | 1.0000000000       |
| 1 p               |                    |
| 0.17757132268     | 1.0000000000       |
| 1 p               |                    |
| 0.69670886939E-01 | 1.0000000000       |
| 6 d               |                    |
| 70.619633393      | 0.59974022914E-03  |
| 16.212096478      | 0.93445952839E-02  |
| 7.3607401479      | -0.70748413897E-01 |
| 2.9309052592      | 0.24037366077      |
| 1.6085414823      | 0.41841372624      |
| 0.84194162715     | 0.32832651044      |
| 1 d               |                    |
| 0.41335677957     | 1.0000000000       |
| 1 d               |                    |
| 0.17400000000     | 1.0000000000       |
| 1 f               |                    |
| 0.37408000000     | 1.0000000000       |
| 1 f               |                    |
| 1.80000000000     | 1.0000000000       |

```

*
at def2-ecp
*
ncore = 60          lmax = 3
# coefficient      r^n      exponent
f
    19.8701980     2         5.8121630
    26.4164520     2         5.7537150
    0.9949700      2         2.5134720
    1.4907010      2         2.5362610
s-f
    49.9571580     2         30.2008320
    283.2103710    2         13.6123060
    62.2810520     2         8.5293400
    -19.8701980    2         5.8121630
    -26.4164520    2         5.7537150
    -0.9949700     2         2.5134720
    -1.4907010     2         2.5362610
p-f
    71.9823710     2         10.8540650
    143.9035320    2         9.4682290
    4.8717590      2         7.0311140
    8.9830590      2         6.1438580
    -19.8701980    2         5.8121630
    -26.4164520    2         5.7537150
    -0.9949700     2         2.5134720
    -1.4907010     2         2.5362610
d-f
    36.3632370     2         8.3135150
    54.5489700     2         7.9989650
    9.7762850      2         5.1799660
    14.2647550     2         4.9422260
    -19.8701980    2         5.8121630
    -26.4164520    2         5.7537150
    -0.9949700     2         2.5134720
    -1.4907010     2         2.5362610
*
*
rn def2-TZVP
# rn      (11s10p8d2f) / [6s5p3d2f]      {521111/34111/611/11}
*
  5 s
5187.7442468      0.16097034848E-03
768.14491207      0.10508214789E-02
159.35182065      0.27375438093E-02
21.863432724      -0.55045904905
18.388689978      0.78321373922
  2 s
24.816226448      -0.82636797204E-01
7.2923301677      1.0926256000
  1 s
2.0850437166      1.0000000000
  1 s
1.0915245945      1.0000000000
  1 s
0.34915708428      1.0000000000
  1 s
0.13648422952      1.0000000000
  3 p
194.68918723      0.26265814046E-03

```

|                            |                    |            |
|----------------------------|--------------------|------------|
| 11.210013525               | 0.19952302621      |            |
| 7.5298316489               | -0.45994479561     |            |
| 4 p                        |                    |            |
| 9.0845000304               | -0.23093917426     |            |
| 6.2631489717               | 0.39747614192      |            |
| 2.2545193734               | 0.83026693838      |            |
| 1.1180666918               | 0.51467013112      |            |
| 1 p                        |                    |            |
| 0.47444492594              | 1.00000000000      |            |
| 1 p                        |                    |            |
| 0.20172354616              | 1.00000000000      |            |
| 1 p                        |                    |            |
| 0.79503144392E-01          | 1.00000000000      |            |
| 6 d                        |                    |            |
| 75.302723665               | 0.73590238429E-03  |            |
| 17.965913830               | 0.89490827389E-02  |            |
| 7.3741298033               | -0.76641663693E-01 |            |
| 3.2296258578               | 0.22975404602      |            |
| 1.7937840508               | 0.43991495311      |            |
| 0.94633319732              | 0.35259395198      |            |
| 1 d                        |                    |            |
| 0.46860482223              | 1.00000000000      |            |
| 1 d                        |                    |            |
| 0.20000000000              | 1.00000000000      |            |
| 1 f                        |                    |            |
| 0.41806000000              | 1.00000000000      |            |
| 1 f                        |                    |            |
| 2.10000000000              | 1.00000000000      |            |
| *                          |                    |            |
| rn def2-ecp                |                    |            |
| *                          |                    |            |
| ncore = 60                 | lmax = 3           |            |
| # coefficient r^n exponent |                    |            |
| f                          |                    |            |
| 21.7972900                 | 2                  | 6.3485710  |
| 28.9468050                 | 2                  | 6.2959490  |
| 1.4473650                  | 2                  | 2.8821180  |
| 2.1779640                  | 2                  | 2.9080480  |
| s-f                        |                    |            |
| 49.9655510                 | 2                  | 30.1512420 |
| 283.0700000                | 2                  | 14.5212410 |
| 62.0028700                 | 2                  | 8.0520380  |
| -21.7972900                | 2                  | 6.3485710  |
| -28.9468050                | 2                  | 6.2959490  |
| -1.4473650                 | 2                  | 2.8821180  |
| -2.1779640                 | 2                  | 2.9080480  |
| p-f                        |                    |            |
| 71.9691190                 | 2                  | 11.0099420 |
| 143.8605590                | 2                  | 9.6176250  |
| 4.7147610                  | 2                  | 7.3360080  |
| 9.0130650                  | 2                  | 6.4062530  |
| -21.7972900                | 2                  | 6.3485710  |
| -28.9468050                | 2                  | 6.2959490  |
| -1.4473650                 | 2                  | 2.8821180  |
| -2.1779640                 | 2                  | 2.9080480  |
| d-f                        |                    |            |
| 36.3683650                 | 2                  | 8.3692200  |
| 54.5517610                 | 2                  | 8.1169750  |
| 9.6344870                  | 2                  | 5.3536560  |
| 14.3879020                 | 2                  | 5.0972120  |

|             |   |           |
|-------------|---|-----------|
| -21.7972900 | 2 | 6.3485710 |
| -28.9468050 | 2 | 6.2959490 |
| -1.4473650  | 2 | 2.8821180 |
| -2.1779640  | 2 | 2.9080480 |

\*

\$end

=====  
def2-TZVPP  
=====

\*

h def2-TZVPP

# h (5s2p1d) / [3s2p1d] {311/11/1}

\*

|               |                   |  |
|---------------|-------------------|--|
| 3 s           |                   |  |
| 34.061341000  | 0.60251978000E-02 |  |
| 5.1235746000  | 0.45021094000E-01 |  |
| 1.1646626000  | 0.20189726000     |  |
| 1 s           |                   |  |
| 0.32723041000 | 1.00000000000     |  |
| 1 s           |                   |  |
| 0.10307241000 | 1.00000000000     |  |
| 1 p           |                   |  |
| 1.40700000000 | 1.00000000000     |  |
| 1 p           |                   |  |
| 0.38800000000 | 1.00000000000     |  |
| 1 d           |                   |  |
| 1.05700000000 | 1.00000000000     |  |

\*

\*

he def2-TZVPP

# he (5s2p1d) / [3s2p1d] {311/11/1}

\*

|               |                   |  |
|---------------|-------------------|--|
| 3 s           |                   |  |
| 98.078321616  | 0.75803064967E-02 |  |
| 14.764404247  | 0.54848620937E-01 |  |
| 3.3185831473  | 0.22074382186     |  |
| 1 s           |                   |  |
| 0.87413869551 | 1.00000000000     |  |
| 1 s           |                   |  |
| 0.24459897208 | 1.00000000000     |  |
| 1 p           |                   |  |
| 3.04400000000 | 1.00000000000     |  |
| 1 p           |                   |  |
| 0.75800000000 | 1.00000000000     |  |
| 1 d           |                   |  |
| 1.96500000000 | 1.00000000000     |  |

\*

\*

li def2-TZVPP

# li (11s3p1d) / [5s3p1d] {62111/111/1}

\*

|              |                   |  |
|--------------|-------------------|--|
| 6 s          |                   |  |
| 6269.2628010 | 0.20540968826E-03 |  |
| 940.31612431 | 0.15916554089E-02 |  |
| 214.22107528 | 0.82869829707E-02 |  |
| 60.759840184 | 0.33856374249E-01 |  |
| 19.915152032 | 0.11103225876     |  |
| 7.3171509797 | 0.27449383329     |  |
| 2 s          |                   |  |
| 2.9724674216 | 0.23792456411     |  |



```

1.2639852314      0.30765411924
 1 s
0.51427489953    1.00000000000
 1 s
0.77030885901E-01 1.00000000000
 1 s
0.28938896433E-01 1.00000000000
 1 p
0.40000000000    1.00000000000
 1 p
0.60000000000E-01 1.00000000000
 1 p
 3.3270000000    1.00000000000
 1 d
0.13190000000    1.00000000000
*
*
be def2-TZVPP
# be      (11s4p1d) / [5s3p1d]      {62111/121/1}
*
 6 s
4700.2365626     0.23584389316E-03
704.82845622    0.18243791019E-02
160.43110478    0.93966148224E-02
45.425347336    0.36908924159E-01
14.798334125    0.10897561281
5.3512452537    0.21694284551
 2 s
2.1542044819    0.44695408857
0.93363744400    0.20866985771
 1 s
0.18791432989    1.00000000000
 1 s
0.74648267947E-01 1.00000000000
 1 s
0.32650484598E-01 1.00000000000
 1 p
 3.6316917145    -0.29033998305E-01
 2 p
0.71695694366    -0.16877854032
0.19541932860    -0.51403419628
 1 p
0.60515465890E-01 1.00000000000
 1 d
0.18000000000    0.00000000000
*
*
b def2-TZVPP
# b      (11s6p2d1f) / [5s3p2d1f]    {62111/411/11/1}
*
 6 s
8564.8660687    0.22837198155E-03
1284.1516263    0.17682576447E-02
292.27871604    0.91407080516E-02
82.775469176    0.36342638989E-01
27.017939269    0.11063458441
9.8149619660    0.23367344321
 2 s
3.9318559059    0.41818777978
1.6595599712    0.22325473798

```

```

1 s
0.35762965239      1.0000000000
1 s
0.14246277496      1.0000000000
1 s
0.60560594768E-01  1.0000000000
4 p
22.453875803      0.50265575179E-02
5.1045058330      0.32801738965E-01
1.4986081344      0.13151230768
0.50927831315      0.33197167769
1 p
0.18147077798      0.47314319570
1 p
0.64621893904E-01  0.25802783943
1 d
0.66100000000      1.0000000000
1 d
0.19900000000      1.0000000000
1 f
0.49000000000      1.0000000000
*
*
c def2-TZVPP
# c      (11s6p2d1f) / [5s3p2d1f]      {62111/411/11/1}
*
6 s
13575.349682      0.22245814352E-03
2035.2333680      0.17232738252E-02
463.22562359      0.89255715314E-02
131.20019598      0.35727984502E-01
42.853015891      0.11076259931
15.584185766      0.24295627626
2 s
6.2067138508      0.41440263448
2.5764896527      0.23744968655
1 s
0.57696339419      1.0000000000
1 s
0.22972831358      1.0000000000
1 s
0.95164440028E-01  1.0000000000
4 p
34.697232244      0.53333657805E-02
7.9582622826      0.35864109092E-01
2.3780826883      0.14215873329
0.81433208183      0.34270471845
1 p
0.28887547253      0.46445822433
1 p
0.10056823671      0.24955789874
1 d
1.09700000000      1.0000000000
1 d
0.31800000000      1.0000000000
1 f
0.76100000000      1.0000000000
*
*
n def2-TZVPP

```

# n (11s6p2d1f) / [5s3p2d1f] {62111/411/11/1}

\*

|               |                   |
|---------------|-------------------|
| 6 s           |                   |
| 19730.800647  | 0.21887984991E-03 |
| 2957.8958745  | 0.16960708803E-02 |
| 673.22133595  | 0.87954603538E-02 |
| 190.68249494  | 0.35359382605E-01 |
| 62.295441898  | 0.11095789217     |
| 22.654161182  | 0.24982972552     |
| 2 s           |                   |
| 8.9791477428  | 0.40623896148     |
| 3.6863002370  | 0.24338217176     |
| 1 s           |                   |
| 0.84660076805 | 1.0000000000      |
| 1 s           |                   |
| 0.33647133771 | 1.0000000000      |
| 1 s           |                   |
| 0.13647653675 | 1.0000000000      |
| 4 p           |                   |
| 49.200380510  | 0.55552416751E-02 |
| 11.346790537  | 0.38052379723E-01 |
| 3.4273972411  | 0.14953671029     |
| 1.1785525134  | 0.34949305230     |
| 1 p           |                   |
| 0.41642204972 | 0.45843153697     |
| 1 p           |                   |
| 0.14260826011 | 0.24428771672     |
| 1 d           |                   |
| 1.6540000000  | 1.0000000000      |
| 1 d           |                   |
| 0.4690000000  | 1.0000000000      |
| 1 f           |                   |
| 1.0930000000  | 1.0000000000      |

\*

\*

o def2-TZVPP

# o (11s6p2d1f) / [5s3p2d1f] {62111/411/11/1}

\*

|               |                   |
|---------------|-------------------|
| 6 s           |                   |
| 27032.382631  | 0.21726302465E-03 |
| 4052.3871392  | 0.16838662199E-02 |
| 922.32722710  | 0.87395616265E-02 |
| 261.24070989  | 0.35239968808E-01 |
| 85.354641351  | 0.11153519115     |
| 31.035035245  | 0.25588953961     |
| 2 s           |                   |
| 12.260860728  | 0.39768730901     |
| 4.9987076005  | 0.24627849430     |
| 1 s           |                   |
| 1.1703108158  | 1.0000000000      |
| 1 s           |                   |
| 0.46474740994 | 1.0000000000      |
| 1 s           |                   |
| 0.18504536357 | 1.0000000000      |
| 4 p           |                   |
| 63.274954801  | 0.60685103418E-02 |
| 14.627049379  | 0.41912575824E-01 |
| 4.4501223456  | 0.16153841088     |
| 1.5275799647  | 0.35706951311     |
| 1 p           |                   |

|                               |                   |
|-------------------------------|-------------------|
| 0.52935117943                 | 0.44794207502     |
| 1 p                           |                   |
| 0.17478421270                 | 0.24446069663     |
| 1 d                           |                   |
| 2.3140000000                  | 1.0000000000      |
| 1 d                           |                   |
| 0.6450000000                  | 1.0000000000      |
| 1 f                           |                   |
| 1.4280000000                  | 1.0000000000      |
| *                             |                   |
| *                             |                   |
| f def2-TZVPP                  |                   |
| # f (11s6p2d1f) / [5s3p2d1f]  | {62111/411/11/1}  |
| *                             |                   |
| 6 s                           |                   |
| 35479.100441                  | 0.21545014888E-03 |
| 5318.4728983                  | 0.16700686527E-02 |
| 1210.4810975                  | 0.86733211476E-02 |
| 342.85518140                  | 0.35049933175E-01 |
| 112.01943181                  | 0.11165320133     |
| 40.714740248                  | 0.25988506647     |
| 2 s                           |                   |
| 16.039678111                  | 0.39422966880     |
| 6.5038186740                  | 0.24998238551     |
| 1 s                           |                   |
| 1.5440477509                  | 1.0000000000      |
| 1 s                           |                   |
| 0.61223452862                 | 1.0000000000      |
| 1 s                           |                   |
| 0.24027979698                 | 1.0000000000      |
| 4 p                           |                   |
| 80.233900483                  | 0.63685999134E-02 |
| 18.594010743                  | 0.44303143530E-01 |
| 5.6867902653                  | 0.16867248708     |
| 1.9511006294                  | 0.36166346255     |
| 1 p                           |                   |
| 0.66970211298                 | 0.44202901491     |
| 1 p                           |                   |
| 0.21651300410                 | 0.24319875730     |
| 1 d                           |                   |
| 3.1070000000                  | 1.0000000000      |
| 1 d                           |                   |
| 0.8550000000                  | 1.0000000000      |
| 1 f                           |                   |
| 1.9170000000                  | 1.0000000000      |
| *                             |                   |
| *                             |                   |
| ne def2-TZVPP                 |                   |
| # ne (11s6p2d1f) / [5s3p2d1f] | {62111/411/11/1}  |
| *                             |                   |
| 6 s                           |                   |
| 45069.464022                  | 0.21687155182E-03 |
| 6755.9768656                  | 0.16812736757E-02 |
| 1537.6502864                  | 0.87356062782E-02 |
| 435.51697667                  | 0.35361266922E-01 |
| 142.28655638                  | 0.11321521454     |
| 51.692153804                  | 0.26654653104     |
| 2 s                           |                   |
| 20.315870490                  | 0.39631959951     |
| 8.2021942646                  | 0.25582811251     |

```

1 s
1.9681276278      1.0000000000
1 s
0.77904756001    1.0000000000
1 s
0.30229502043    1.0000000000
4 p
99.782996032     0.65569234163E-02
23.176124101     0.45888009138E-01
7.1163945872     0.17331287812
2.4418711435     0.36475267512
1 p
0.83389605766    0.43831075171
1 p
0.26607311301    0.24160029835
1 d
4.0140000000     1.0000000000
1 d
1.0960000000     1.0000000000
1 f
2.5440000000     1.0000000000
*
*
na def2-TZVPP
# na      (14s8p3d) / [5s4p3d]      {73211/5111/111}
*
7 s
26041.109927     0.61806342811E-03
3906.1268548     0.47748604414E-02
888.97454993     0.24471684829E-01
251.45497961     0.94755394977E-01
81.650143512     0.26867496920
28.904158401     0.47925475440
10.625782932     0.33248591469
3 s
53.769410179     0.19527731872E-01
16.308243025     0.92648010794E-01
2.3730384125     -0.39938670172
2 s
0.95730772603    1.6428595391
0.40806460959    0.55692596966
1 s
0.49967582329E-01  1.0000000000
1 s
0.19268616250E-01  1.0000000000
5 p
138.07979989     0.57951891929E-02
32.232700393     0.41620846251E-01
9.9816075360     0.16281916885
3.4822033928     0.36011784647
1.2299134620     0.44858979889
1 p
0.41743959423    0.23040759559
1 p
0.30000000000E-01  1.0000000000
1 p
0.91000000000E-01  1.0000000000
1 d
2.6090000000     1.0000000000
1 d

```

```

0.430000000000      0.0000000000
 1 d
0.100000000000      0.0000000000
*
*
mg def2-TZVPP
# mg      (14s8p3d) / [5s4p3d]      {73211/5111/111}
*
 7 s
31438.349555      0.60912311326E-03
4715.5153354      0.47066196465E-02
1073.1629247      0.24135820657E-01
303.57238768      0.93628959834E-01
98.626251042      0.26646742093
34.943808417      0.47890929917
12.859785199      0.33698490286
 3 s
64.876913004      0.19180889307E-01
19.725520777      0.90913704392E-01
2.8951804339      -0.39563756125
 2 s
1.1960454710      1.6827603373
0.54329451156      0.52141091954
 1 s
0.10099104092      1.0000000000
 1 s
0.36865728085E-01  1.0000000000
 5 p
179.87189612      0.53799549018E-02
42.120069376      0.39318014098E-01
13.120503032      0.15740129476
4.6257503609      0.35919094128
1.6695211016      0.45533379310
 1 p
0.58551012105      0.21986432910
 1 p
0.18914796195      1.0000000000
 1 p
0.53768755187E-01  1.0000000000
 1 d
3.4440000000      1.0000000000
 1 d
0.290000000000      1.0000000000
 1 d
0.70000000000E-01  1.0000000000
*
*
al def2-TZVPP
# al      (14s9p3d1f) / [5s5p3d1f]      {73211/51111/111/1}
*
 7 s
37792.550772      0.57047888709E-03
5668.0682165      0.44093016538E-02
1289.8582841      0.22630967411E-01
364.86596028      0.88025644295E-01
118.57631515      0.25223701612
42.024867605      0.45960547169
15.499501629      0.33277886014
 3 s
75.208026598      0.19250560190E-01

```

```

23.031408972      0.87906743952E-01
3.6348797649     -0.34246704535
 2 s
1.6065049957      1.5106266058
0.76103394581     0.58071016470
 1 s
0.16556708849      1.00000000000
 1 s
0.60041577113E-01  1.00000000000
 5 p
452.52303192      0.23110812466E-02
107.08195049      0.18568641823E-01
34.131021255      0.87216237035E-01
12.587037428      0.26902101523
4.9811919704      0.52128324272
 1 p
2.0070350900      0.60271687494
 1 p
0.80083714374      1.00000000000
 1 p
0.20178927472      1.00000000000
 1 p
0.57895550392E-01  1.00000000000
 1 d
1.57000000000      1.00000000000
 1 d
0.33300000000      1.00000000000
 1 d
0.11100000000      1.00000000000
 1 f
0.24400000000      1.00000000000
*
*
si def2-TZVPP
# si      (14s9p3d1f) / [5s5p3d1f]      {73211/51111/111/1}
*
 7 s
44773.358078      0.55914765868E-03
6717.1992104      0.43206040189E-02
1528.8960325      0.22187096460E-01
432.54746585      0.86489249116E-01
140.61505226      0.24939889716
49.857636724      0.46017197366
18.434974885      0.34250236575
 3 s
86.533886111      0.21300063007E-01
26.624606846      0.94676139318E-01
4.4953057159     -0.32616264859
 2 s
2.1035045710      1.3980803850
1.0106094922      0.63865786699
 1 s
0.23701751489      1.00000000000
 1 s
0.85703405362E-01  1.00000000000
 5 p
394.47503628      0.26285693959E-02
93.137683104      0.20556257749E-01
29.519608742      0.92070262801E-01
10.781663791      0.25565889739

```

|                                                  |                   |
|--------------------------------------------------|-------------------|
| 4.1626574778                                     | 0.42111707185     |
| 1 p                                              |                   |
| 1.6247972989                                     | 0.34401746318     |
| 1 p                                              |                   |
| 0.54306660493                                    | 1.0000000000      |
| 1 p                                              |                   |
| 0.20582073956                                    | 1.0000000000      |
| 1 p                                              |                   |
| 0.70053487306E-01                                | 1.0000000000      |
| 1 d                                              |                   |
| 2.3030000000                                     | 1.0000000000      |
| 1 d                                              |                   |
| 0.47600000000                                    | 1.0000000000      |
| 1 d                                              |                   |
| 0.16000000000                                    | 1.0000000000      |
| 1 f                                              |                   |
| 0.33600000000                                    | 1.0000000000      |
| *                                                |                   |
| *                                                |                   |
| p def2-TZVPP                                     |                   |
| # p (14s9p3d1f) / [5s5p3d1f] {73211/51111/111/1} |                   |
| *                                                |                   |
| 7 s                                              |                   |
| 52426.999233                                     | 0.55207164100E-03 |
| 7863.2660552                                     | 0.42678595308E-02 |
| 1789.5227333                                     | 0.21931529186E-01 |
| 506.27300165                                     | 0.85667168373E-01 |
| 164.60698546                                     | 0.24840686605     |
| 58.391918722                                     | 0.46336753971     |
| 21.643663201                                     | 0.35350558156     |
| 3 s                                              |                   |
| 99.013837620                                     | 0.21895679958E-01 |
| 30.550439817                                     | 0.95650470295E-01 |
| 5.4537087661                                     | -0.29454270186    |
| 2 s                                              |                   |
| 2.6503362563                                     | 1.3294381200      |
| 1.2726688867                                     | 0.66109396473     |
| 1 s                                              |                   |
| 0.31645005203                                    | 1.0000000000      |
| 1 s                                              |                   |
| 0.11417466938                                    | 1.0000000000      |
| 5 p                                              |                   |
| 472.27219248                                     | 0.25710623052E-02 |
| 111.58882756                                     | 0.20250297999E-01 |
| 35.445936418                                     | 0.91580716787E-01 |
| 12.990776875                                     | 0.25749454014     |
| 5.0486221658                                     | 0.42862899758     |
| 1 p                                              |                   |
| 1.9934049566                                     | 0.34359817849     |
| 1 p                                              |                   |
| 0.66527284430                                    | 1.0000000000      |
| 1 p                                              |                   |
| 0.25516832128                                    | 1.0000000000      |
| 1 p                                              |                   |
| 0.90357762251E-01                                | 1.0000000000      |
| 1 d                                              |                   |
| 3.1200000000                                     | 1.0000000000      |
| 1 d                                              |                   |
| 0.64800000000                                    | 1.0000000000      |
| 1 d                                              |                   |



```

0.21800000000      1.0000000000
  1 f
0.45200000000      1.0000000000
*
*
s def2-TZVPP
# s      (14s9p3d1f) / [5s5p3d1f]      {73211/51111/111/1}
*
  7 s
60700.928104      0.54695944225E-03
9102.6106854      0.42297224557E-02
2071.4166009      0.21747824159E-01
586.02476821      0.85100053589E-01
190.55395021      0.24799128459
67.630384260      0.46703640406
25.127306905      0.36434587550
  3 s
112.57463010      0.21670040240E-01
34.795554217      0.93602301760E-01
6.5115556215      -0.26068001422
  2 s
3.2399032261      1.2842089435
1.5477160881      0.66036416584
  1 s
0.40541030112      1.0000000000
  1 s
0.14550651059      1.0000000000
  5 p
564.36716027      0.24796796317E-02
133.42624379      0.19677930250E-01
42.468271189      0.89980008258E-01
15.616527580      0.25705880575
6.1093988469      0.43515167292
  1 p
2.4404160198      0.34883240595
  1 p
0.83882201296      1.0000000000
  1 p
0.31288746900      1.0000000000
  1 p
0.10770109004      1.0000000000
  1 d
3.75600000000      1.0000000000
  1 d
0.81200000000      1.0000000000
  1 d
0.27300000000      1.0000000000
  1 f
0.55700000000      1.0000000000
*
*
c1 def2-TZVPP
# c1      (14s9p3d1f) / [5s5p3d1f]      {73211/51111/111/1}
*
  7 s
69507.990945      0.54314897497E-03
10426.156880      0.41990463961E-02
2373.2334061      0.21592141679E-01
671.56420071      0.84598850094E-01
218.41999790      0.24757249724

```

|                                                   |                   |
|---------------------------------------------------|-------------------|
| 77.572249714                                      | 0.47016930228     |
| 28.888815277                                      | 0.37436370716     |
| 3 s                                               |                   |
| 127.10527185                                      | 0.25182166603E-01 |
| 39.339582961                                      | 0.10786112456     |
| 7.6740679989                                      | -0.27408821574    |
| 2 s                                               |                   |
| 3.8745627630                                      | 1.3213875014      |
| 1.8385832573                                      | 0.68636955368     |
| 1 s                                               |                   |
| 0.50229057542                                     | 1.0000000000      |
| 1 s                                               |                   |
| 0.17962723420                                     | 1.0000000000      |
| 5 p                                               |                   |
| 666.50423284                                      | 0.23632663836E-02 |
| 157.64241690                                      | 0.18879300374E-01 |
| 50.262520978                                      | 0.87206341273E-01 |
| 18.536078105                                      | 0.25285612970     |
| 7.2940532777                                      | 0.43507154820     |
| 1 p                                               |                   |
| 2.9433248995                                      | 0.35026513165     |
| 1 p                                               |                   |
| 1.0404970818                                      | 1.0000000000      |
| 1 p                                               |                   |
| 0.38456415080                                     | 1.0000000000      |
| 1 p                                               |                   |
| 0.13069642732                                     | 1.0000000000      |
| 1 d                                               |                   |
| 4.6100000000                                      | 1.0000000000      |
| 1 d                                               |                   |
| 1.0110000000                                      | 1.0000000000      |
| 1 d                                               |                   |
| 0.33900000000                                     | 1.0000000000      |
| 1 f                                               |                   |
| 0.70600000000                                     | 1.0000000000      |
| *                                                 |                   |
| *                                                 |                   |
| ar def2-TZVPP                                     |                   |
| # ar (14s9p3d1f) / [5s5p3d1f] {73211/51111/111/1} |                   |
| *                                                 |                   |
| 7 s                                               |                   |
| 79111.422998                                      | 0.51029325002E-03 |
| 11864.746009                                      | 0.39463036981E-02 |
| 2700.1642973                                      | 0.20307073910E-01 |
| 763.95943485                                      | 0.79691825214E-01 |
| 248.45150561                                      | 0.23420623836     |
| 88.283581000                                      | 0.44833849481     |
| 32.948607069                                      | 0.36408167400     |
| 3 s                                               |                   |
| 142.55358000                                      | 0.26387407001E-01 |
| 44.163688009                                      | 0.11226433999     |
| 8.9524995000                                      | -0.26178922001    |
| 2 s                                               |                   |
| 4.5546920941                                      | 1.3002484998      |
| 2.1444079001                                      | 0.67197237009     |
| 1 s                                               |                   |
| 0.60708777004                                     | 1.0000000000      |
| 1 s                                               |                   |
| 0.21651431999                                     | 1.0000000000      |
| 5 p                                               |                   |

|                                             |                    |
|---------------------------------------------|--------------------|
| 776.77541998                                | 0.22028005003E-02  |
| 183.80107018                                | 0.17694180008E-01  |
| 58.694003175                                | 0.82431293717E-01  |
| 21.701591695                                | 0.24207278863      |
| 8.5821489635                                | 0.42263558251      |
| 1 p                                         |                    |
| 3.4922679161                                | 0.34151806086      |
| 1 p                                         |                    |
| 1.2637426998                                | 1.0000000000       |
| 1 p                                         |                    |
| 0.46607870005                               | 1.0000000000       |
| 1 p                                         |                    |
| 0.15766003000                               | 1.0000000000       |
| 1 d                                         |                    |
| 5.55100000000                               | 1.0000000000       |
| 1 d                                         |                    |
| 1.23500000000                               | 1.0000000000       |
| 1 d                                         |                    |
| 0.41200000000                               | 1.0000000000       |
| 1 f                                         |                    |
| 0.89000000000                               | 1.0000000000       |
| *                                           |                    |
| *                                           |                    |
| k def2-TZVPP                                |                    |
| # k (17s11p3d) / [6s4p3d] {842111/6311/111} |                    |
| *                                           |                    |
| 8 s                                         |                    |
| 153976.18325                                | 0.23662636107E-03  |
| 23082.497672                                | 0.18342929137E-02  |
| 5253.2344745                                | 0.95310527769E-02  |
| 1486.9550133                                | 0.38638406980E-01  |
| 484.06333726                                | 0.12480768502      |
| 173.56653980                                | 0.29278861009      |
| 67.116381464                                | 0.40633425860      |
| 26.339502054                                | 0.20077215860      |
| 4 s                                         |                    |
| 172.87693567                                | -0.24200960936E-01 |
| 53.058649063                                | -0.11553095040     |
| 7.9212753964                                | 0.57455545175      |
| 3.2108880472                                | 0.57023185107      |
| 2 s                                         |                    |
| 4.5662070895                                | -0.22615763466     |
| 0.70209907282                               | 0.75528392045      |
| 1 s                                         |                    |
| 0.28258942635                               | 1.0000000000       |
| 1 s                                         |                    |
| 0.35805824617E-01                           | 1.0000000000       |
| 1 s                                         |                    |
| 0.15819213245E-01                           | 1.0000000000       |
| 6 p                                         |                    |
| 728.18449873                                | 0.26150689792E-02  |
| 172.13265061                                | 0.20673630835E-01  |
| 54.829847075                                | 0.93205603870E-01  |
| 20.166266494                                | 0.25436518210      |
| 7.8610728806                                | 0.39131132810      |
| 3.1105213132                                | 0.22481345943      |
| 3 p                                         |                    |
| 11.757337492                                | -0.25777289217E-01 |
| 1.5139617411                                | 0.57359428604      |
| 0.58328591795                               | 1.0798320002       |

```

1 p
0.21570478076      1.0000000000
1 p
0.41737000000E-01  1.0000000000
1 d
0.93000000000      1.0000000000
1 d
0.18000000000      1.0000000000
1 d
0.54000000000E-01  1.0000000000
*
*
ca def2-TZVPP
# ca      (17s12p4d) / [6s5p3d]      {842111/63111/211}
*
8 s
172517.32685      0.23317502546E-03
25861.519275      0.18076521980E-02
5885.6618668      0.93943844255E-02
1665.9730031      0.38108409009E-01
542.36718148      0.12331203853
194.57803492      0.29004470954
75.303597636      0.40587151157
29.574062589      0.20398410743
4 s
191.20074660      -0.24419759759E-01
58.840299883      -0.11547027448
8.9642540845      0.56356636717
3.6856960541      0.56709682704
2 s
5.2464289726      -0.22825334325
0.84862621528      0.72625219172
1 s
0.36743300538      1.0000000000
1 s
0.66821582613E-01  1.0000000000
1 s
0.26759730445E-01  1.0000000000
6 p
836.97262058      0.25258346092E-02
197.93040142      0.20076506686E-01
63.135558054      0.91302987366E-01
23.282687170      0.25247029915
9.1176444932      0.39426326344
3.6336120139      0.23011559492
3 p
13.494163120      -0.26495021951E-01
1.8139259790      0.55088108210
0.71981826006      1.0280616620
1 p
0.27629576992      1.0000000000
1 p
0.74979000000E-01  1.0000000000
1 p
0.26927000000E-01  1.0000000000
2 d
5.4979093879      0.73770011433E-01
1.3177128032      0.26052853169
1 d
0.32188682649      0.45233836380

```

```

1 d
0.70528614919E-01 1.0000000000
*
*
sc def2-TZVPP
# sc (17s12p7d2f1g) / [6s5p4d2f1g] {842111/63111/4111/11/1}
*
8 s
191612.91874 0.23076475942E-03
28723.850363 0.17890329946E-02
6537.0116490 0.92990401140E-02
1850.3097171 0.37739438011E-01
602.38855156 0.12227148359
216.17324766 0.28814821470
83.712517880 0.40517543099
32.908707189 0.20566019623
4 s
211.34393234 -0.24527991462E-01
65.128920139 -0.11570158142
10.034311535 0.55995283317
4.1596884597 0.56087765073
2 s
6.0009041613 -0.22840494325
0.98255784150 0.71948970378
1 s
0.42483192773 1.0000000000
1 s
0.77185462096E-01 1.0000000000
1 s
0.30147219702E-01 1.0000000000
6 p
947.34122823 0.24737208744E-02
224.09699732 0.19742967060E-01
71.560334882 0.90357147549E-01
26.444824490 0.25201602503
10.393798285 0.39675535929
4.1606304559 0.23208624517
3 p
15.565737135 -0.27129423974E-01
2.1121544865 0.55109256629
0.84184709021 1.0090635806
1 p
0.32297542652 1.0000000000
1 p
0.12390000000 1.0000000000
1 p
0.47530000000E-01 1.0000000000
4 d
30.989390993 0.11902837431E-01
8.6905465069 0.67655856850E-01
2.9520256337 0.21332539722
1.0761910745 0.38391075578
1 d
0.38338915095 0.43354716259
1 d
0.12534686113 0.24509263822
1 d
0.41000000000E-01 0.0000000000
1 f
0.44200000000 1.0000000000

```

```

1 f
0.11000000000 1.0000000000
1 g
0.24700000000 1.0000000000
*
*
ti def2-TZVPP
# ti (17s12p7d2f1g) / [6s5p4d2f1g] {842111/63111/4111/11/1}
*
8 s
211575.69025 0.23318151011E-03
31714.945058 0.18079690851E-02
7217.5476543 0.93984311352E-02
2042.9394247 0.38156853618E-01
665.12896208 0.12374757197
238.74942264 0.29208551143
92.508691001 0.41226800855
36.403919209 0.21090534061
4 s
232.72624607 -0.24920140738E-01
71.791209711 -0.11746490087
11.158534615 0.56503342318
4.6548135416 0.56211101812
2 s
6.8034629174 -0.23011425503
1.1201076403 0.72103186735
1 s
0.48080118839 1.0000000000
1 s
0.85157274977E-01 1.0000000000
1 s
0.32657477046E-01 1.0000000000
6 p
1063.1474732 0.24690839320E-02
251.56507061 0.19773345523E-01
80.408554854 0.90987976672E-01
29.768193269 0.25559900413
11.736830556 0.40489386764
4.7142375230 0.23693402558
3 p
17.796803704 -0.27878639615E-01
2.4272698680 0.55672914668
0.96823445537 1.0055447350
1 p
0.37056694165 1.0000000000
1 p
0.14180000000 1.0000000000
1 p
0.54270000000E-01 1.0000000000
4 d
37.713384723 0.11513835092E-01
10.692931184 0.67246343996E-01
3.6728446990 0.21484207775
1.3588590303 0.38890892779
1 d
0.49213295253 0.43040835243
1 d
0.16330520653 0.23253305465
1 d
0.54000000000E-01 0.0000000000

```

```

1 f
0.25390000000 1.0000000000
1 f
1.0750000000 1.0000000000
1 g
0.63400000000 1.0000000000
*
*
v def2-TZVPP
# v (17s12p7d2f1g) / [6s5p4d2f1g] {842111/63111/4111/11/1}
*
8 s
232340.65058 0.23072410092E-03
34828.841170 0.17888178962E-02
7926.5448691 0.92992490131E-02
2243.7733046 0.37761463347E-01
730.59322944 0.12255909662
262.32219631 0.28963508811
101.70403805 0.41004702955
40.064784617 0.21113610858
4 s
255.24014968 -0.24458116338E-01
78.804646961 -0.11527205366
12.340598946 0.55174749453
5.1742019219 0.54504528489
2 s
7.6513894469 -0.22967638286
1.2639759898 0.71683769077
1 s
0.53861761721 1.0000000000
1 s
0.92719296124E-01 1.0000000000
1 s
0.34998055176E-01 1.0000000000
6 p
1184.2369151 0.24449826729E-02
280.23075192 0.19643454466E-01
89.643627137 0.90796949190E-01
33.242411253 0.25650768222
13.144514452 0.40815393750
5.2948534140 0.23860378268
3 p
20.175586851 -0.28241489023E-01
2.7605865197 0.55574635619
1.1008900902 0.99319919270
1 p
0.42013310739 1.0000000000
1 p
0.16030000000 1.0000000000
1 p
0.61190000000E-01 1.0000000000
4 d
43.861134864 0.11487174238E-01
12.516021891 0.68247153977E-01
4.3313854957 0.21837784195
1.6138855773 0.39245212296
1 d
0.58749573961 0.42634466786
1 d
0.19515723011 0.22646562601

```

```

1 d
0.650000000000E-01  0.0000000000
1 f
1.70800000000  1.0000000000
1 f
0.39800000000  1.0000000000
1 g
1.00900000000  1.0000000000
*
*
cr def2-TZVPP
# cr      (17s12p7d2f1g) / [6s5p4d2f1g]      {842111/63111/4111/11/1}
*
8 s
254477.80704      0.23386945693E-03
38131.797054      0.18142601800E-02
8675.2930607      0.94363925721E-02
2455.0099848      0.38343639367E-01
799.16217787      0.12459194837
286.90021489      0.29489696029
111.25413232      0.41846149607
43.864152636      0.21633763420
4 s
279.32669173      -0.23450908111E-01
86.274732376      -0.11080370027
13.555756113      0.53028965842
5.6978112751      0.51603516947
2 s
8.5636582615      -0.38109545675
1.3988296768      1.1991591436
1 s
0.57288171116      1.0000000000
1 s
0.90096171317E-01  1.0000000000
1 s
0.34125885135E-01  1.0000000000
6 p
1306.4398864      0.24277326185E-02
309.25311441      0.19544041017E-01
98.996273963      0.90651794553E-01
36.756916451      0.25699279154
14.566657077      0.40935504891
5.8739937432      0.23729388849
3 p
22.890999695      -0.28166026613E-01
3.0855001822      0.56034120148
1.2132329118      0.98119019650
1 p
0.44931680699      1.0000000000
1 p
0.16640000000      1.0000000000
1 p
0.61630000000E-01  1.0000000000
4 d
43.720074476      0.13622964026E-01
12.391242652      0.78935180133E-01
4.2639442006      0.23833840000
1.5525221790      0.39526851122
1 d
0.53761929485      0.41061717056

```



```

1 d
0.16493173074      0.24440410795
1 d
0.51000000000E-01  0.00000000000
1 f
2.3410000000      1.00000000000
1 f
0.54200000000     1.00000000000
1 g
1.3820000000      1.00000000000
*
*
mn def2-TZVPP
# mn      (17s12p7d2f1g) / [6s5p4d2f1g]      {842111/63111/4111/11/1}
*
8 s
277185.00153      0.22838385133E-03
41550.769890      0.17707650375E-02
9455.9700152      0.92077209994E-02
2676.5206482      0.37415971825E-01
871.46687530      0.12164861426
312.98306420      0.28824392499
121.44454051      0.41041600847
47.922598829      0.21372375145
4 s
303.66723163      -0.24589926140E-01
93.881403187      -0.11602608038
14.879421214      0.55112059677
6.2865200745      0.53707560756
2 s
9.4858591337      -0.22889262695
1.5698706158      0.71196169587
1 s
0.65903213608      1.00000000000
1 s
0.10686292371      1.00000000000
1 s
0.39267435433E-01  1.00000000000
6 p
1444.7978182      0.23994136455E-02
342.06551197      0.19369286864E-01
109.58400891      0.90236108988E-01
40.747988173      0.25745467851
16.188626566      0.41272351958
6.5484505964      0.24087700007
3 p
25.357086437      -0.28707174058E-01
3.4830168782      0.55208100712
1.3858800906      0.97226901379
1 p
0.52555094893      1.00000000000
1 p
0.19930000000      1.00000000000
1 p
0.75570000000E-01  1.00000000000
4 d
56.563189119      0.11543245295E-01
16.278734711      0.70299845987E-01
5.6964273914      0.22450770821
2.1411147942      0.39703065434

```

```

1 d
0.78291801938      0.41941039165
1 d
0.25952311214      0.21887261673
1 d
0.860000000000E-01  0.00000000000
1 f
2.97500000000      1.00000000000
1 f
0.720000000000      1.00000000000
1 g
1.75500000000      1.00000000000
*
*
fe def2-TZVPP
# fe      (17s12p7d2f1g) / [6s5p4d2f1g]      {842111/63111/4111/11/1}
*
8 s
300784.84637      0.22806273096E-03
45088.970557      0.17681788761E-02
10262.516317      0.91927083490E-02
2905.2897293      0.37355495807E-01
946.11487137      0.12151108426
339.87832894      0.28818881468
131.94425588      0.41126612677
52.111494077      0.21518583573
4 s
329.48839267      -0.24745216477E-01
101.92332739      -0.11683089050
16.240462745      0.55293621136
6.8840675801      0.53601640182
2 s
10.470693782      -0.22912708577
1.7360039648      0.71159319984
1 s
0.72577288979      1.00000000000
1 s
0.11595528203      1.00000000000
1 s
0.41968227746E-01  1.00000000000
6 p
1585.3959970      0.23793960179E-02
375.38006499      0.19253154755E-01
120.31816501      0.90021836536E-01
44.788749031      0.25798172356
17.829278584      0.41492649744
7.2247153786      0.24207474784
3 p
28.143219756      -0.29041755152E-01
3.8743241412      0.55312260343
1.5410752281      0.96771136842
1 p
0.58285615250      1.00000000000
1 p
0.22040000000      1.00000000000
1 p
0.833800000000E-01  1.00000000000
4 d
61.996675034      0.11971972255E-01
17.873732552      0.73210135410E-01

```

|                                    |                          |  |
|------------------------------------|--------------------------|--|
| 6.2744782934                       | 0.23103094314            |  |
| 2.3552337175                       | 0.39910706494            |  |
| 1 d                                |                          |  |
| 0.85432239901                      | 0.41391589765            |  |
| 1 d                                |                          |  |
| 0.27869254413                      | 0.21909269782            |  |
| 1 d                                |                          |  |
| 0.91000000000E-01                  | 0.00000000000            |  |
| 1 f                                |                          |  |
| 3.46500000000                      | 1.00000000000            |  |
| 1 f                                |                          |  |
| 0.84300000000                      | 1.00000000000            |  |
| 1 g                                |                          |  |
| 2.12800000000                      | 1.00000000000            |  |
| *                                  |                          |  |
| *                                  |                          |  |
| co def2-TZVPP                      |                          |  |
| # co (17s12p7d2f1g) / [6s5p4d2f1g] | {842111/63111/4111/11/1} |  |
| *                                  |                          |  |
| 8 s                                |                          |  |
| 325817.01553                       | 0.22568462484E-03        |  |
| 48839.636453                       | 0.17499397533E-02        |  |
| 11114.937307                       | 0.91003134097E-02        |  |
| 3146.1603642                       | 0.36996256837E-01        |  |
| 1024.4378465                       | 0.12044269621            |  |
| 368.02508816                       | 0.28598731649            |  |
| 142.91229205                       | 0.40908312004            |  |
| 56.482649209                       | 0.21500145739            |  |
| 4 s                                |                          |  |
| 356.40298318                       | -0.24767059678E-01       |  |
| 110.31165215                       | -0.11702139134           |  |
| 17.659634834                       | 0.55215522200            |  |
| 7.5059030479                       | 0.53246877060            |  |
| 2 s                                |                          |  |
| 11.501807176                       | -0.22942470077           |  |
| 1.9081994606                       | 0.71180933514            |  |
| 1 s                                |                          |  |
| 0.79396696891                      | 1.00000000000            |  |
| 1 s                                |                          |  |
| 0.124444448829                     | 1.00000000000            |  |
| 1 s                                |                          |  |
| 0.44444645379E-01                  | 1.00000000000            |  |
| 6 p                                |                          |  |
| 1731.1369144                       | 0.23905767685E-02        |  |
| 409.91750438                       | 0.19382999967E-01        |  |
| 131.45648578                       | 0.90905448509E-01        |  |
| 48.987439714                       | 0.26146681577            |  |
| 19.537078992                       | 0.42157264570            |  |
| 7.9287281634                       | 0.24571813557            |  |
| 3 p                                |                          |  |
| 31.076017584                       | -0.29438069973E-01       |  |
| 4.2835180697                       | 0.55615568168            |  |
| 1.7022921563                       | 0.96772195064            |  |
| 1 p                                |                          |  |
| 0.64202908602                      | 1.00000000000            |  |
| 1 p                                |                          |  |
| 0.24210000000                      | 1.00000000000            |  |
| 1 p                                |                          |  |
| 0.91320000000E-01                  | 1.00000000000            |  |
| 4 d                                |                          |  |

|                                    |                          |  |
|------------------------------------|--------------------------|--|
| 68.140745239                       | 0.11983845360E-01        |  |
| 19.685241019                       | 0.73688540475E-01        |  |
| 6.9322128825                       | 0.23085496779            |  |
| 2.6025125694                       | 0.39281059225            |  |
| 1 d                                |                          |  |
| 0.94016837302                      | 0.40203412228            |  |
| 1 d                                |                          |  |
| 0.30381457794                      | 0.21415606743            |  |
| 1 d                                |                          |  |
| 0.980000000000E-01                 | 0.00000000000            |  |
| 1 f                                |                          |  |
| 3.9550000000                       | 1.00000000000            |  |
| 1 f                                |                          |  |
| 0.965000000000                     | 1.00000000000            |  |
| 1 g                                |                          |  |
| 2.50000000000                      | 1.00000000000            |  |
| *                                  |                          |  |
| *                                  |                          |  |
| ni def2-TZVPP                      |                          |  |
| # ni (17s12p7d2f1g) / [6s5p4d2f1g] | {842111/63111/4111/11/1} |  |
| *                                  |                          |  |
| 8 s                                |                          |  |
| 351535.72935                       | 0.22529386884E-03        |  |
| 52695.809283                       | 0.17468616223E-02        |  |
| 11992.468293                       | 0.90849992136E-02        |  |
| 3394.5776689                       | 0.36940748447E-01        |  |
| 1105.3594585                       | 0.12032819950            |  |
| 397.14677769                       | 0.28596715057            |  |
| 154.27542974                       | 0.40983020196            |  |
| 61.018723780                       | 0.21620642851            |  |
| 4 s                                |                          |  |
| 384.45559739                       | -0.24651279268E-01       |  |
| 119.04879199                       | -0.11658505277           |  |
| 19.137012223                       | 0.54864126676            |  |
| 8.1526718562                       | 0.52640051122            |  |
| 2 s                                |                          |  |
| 12.579408642                       | -0.22797884293           |  |
| 2.0870866081                       | 0.70703738215            |  |
| 1 s                                |                          |  |
| 0.86432568555                      | 1.00000000000            |  |
| 1 s                                |                          |  |
| 0.13283169217                      | 1.00000000000            |  |
| 1 s                                |                          |  |
| 0.46845327726E-01                  | 1.00000000000            |  |
| 6 p                                |                          |  |
| 1883.0907486                       | 0.23748258443E-02        |  |
| 445.95155320                       | 0.19289457172E-01        |  |
| 143.08430815                       | 0.90718211507E-01        |  |
| 53.372920722                       | 0.26181414117            |  |
| 21.321919357                       | 0.42309149832            |  |
| 8.6643561994                       | 0.24641686015            |  |
| 3 p                                |                          |  |
| 34.144255211                       | -0.29677129163E-01       |  |
| 4.7122455921                       | 0.55616824096            |  |
| 1.8709231845                       | 0.96357766460            |  |
| 1 p                                |                          |  |
| 0.70370016267                      | 1.00000000000            |  |
| 1 p                                |                          |  |
| 0.264600000000                     | 1.00000000000            |  |
| 1 p                                |                          |  |

```

0.995500000000E-01  1.0000000000
  4 d
  74.591603465      0.12077454672E-01
  21.590632752      0.74637262154E-01
  7.6246142580      0.23236775502
  2.8632206762      0.39042651680
  1 d
  1.0311063388      0.39509498921
  1 d
0.33060760691      0.21138769167
  1 d
0.10600000000      0.00000000000
  1 f
  4.44600000000      1.00000000000
  1 f
  1.08700000000      1.00000000000
  1 g
  2.87200000000      1.00000000000
*
*
cu def2-TZVPP
# cu      (17s12p7d2f1g) / [6s5p4d2f1g]      {842111/63111/4111/11/1}
*
  8 s
  377518.79923      0.22811766128E-03
  56589.984311      0.17688035931E-02
  12878.711706      0.91993460227E-02
  3645.3752143      0.37411016434E-01
  1187.0072945      0.12189873737
  426.46421902      0.28983900714
  165.70660164      0.41531872174
  65.598942707      0.21905799287
  4 s
  414.41265811      -0.24682525053E-01
  128.32056039      -0.11716827406
  20.622089750      0.55301315941
  8.7821226045      0.52242718609
  2 s
  13.741372006      -0.22736061821
  2.2431246833      0.71761210873
  1 s
0.89370549079      1.00000000000
  1 s
0.10836699534      1.00000000000
  1 s
0.38806178058E-01  1.00000000000
  6 p
  2034.7596692      0.23524822298E-02
  481.90468106      0.19134070751E-01
  154.67482963      0.90171105278E-01
  57.740576969      0.26063284735
  23.099052811      0.42093485770
  9.3882478591      0.24344615121
  3 p
  37.596171210      -0.28991094530E-01
  5.1240690810      0.54919083831
  2.0119996085      0.93793330488
  1 p
0.73860686002      1.00000000000
  1 p

```

|                                    |                    |                          |
|------------------------------------|--------------------|--------------------------|
| 0.27110000000                      | 1.0000000000       |                          |
| 1 p                                |                    |                          |
| 0.99540000000E-01                  | 1.0000000000       |                          |
| 4 d                                |                    |                          |
| 74.129460637                       | 0.14363216676E-01  |                          |
| 21.359842587                       | 0.86628177096E-01  |                          |
| 7.4995240537                       | 0.25631430541      |                          |
| 2.7601394169                       | 0.40374062368      |                          |
| 1 d                                |                    |                          |
| 0.95362061236                      | 0.39427042447      |                          |
| 1 d                                |                    |                          |
| 0.28420862520                      | 0.23091146816      |                          |
| 1 d                                |                    |                          |
| 0.85000000000E-01                  | 0.0000000000       |                          |
| 1 f                                |                    |                          |
| 1.2090000000                       | 1.0000000000       |                          |
| 1 f                                |                    |                          |
| 4.9360000000                       | 1.0000000000       |                          |
| 1 g                                |                    |                          |
| 3.2450000000                       | 1.0000000000       |                          |
| *                                  |                    |                          |
| *                                  |                    |                          |
| zn def2-TZVPP                      |                    |                          |
| # zn (17s12p7d2f1g) / [6s5p4d2f1g] |                    | {842111/63111/4111/11/1} |
| *                                  |                    |                          |
| 8 s                                |                    |                          |
| 405924.31028                       | 0.22442017483E-03  |                          |
| 60846.955735                       | 0.17402086626E-02  |                          |
| 13847.343092                       | 0.90513339565E-02  |                          |
| 3919.6158551                       | 0.36817341445E-01  |                          |
| 1276.3594167                       | 0.12004850256      |                          |
| 458.67254435                       | 0.28576057621      |                          |
| 178.28725246                       | 0.41087462062      |                          |
| 70.612192837                       | 0.21816962456      |                          |
| 4 s                                |                    |                          |
| 443.88077950                       | -0.24934274984E-01 |                          |
| 137.55875267                       | -0.11817955766     |                          |
| 22.268083479                       | 0.55367318468      |                          |
| 9.5217310606                       | 0.52628934936      |                          |
| 2 s                                |                    |                          |
| 14.874114065                       | -0.22929955254     |                          |
| 2.4647517612                       | 0.71135484742      |                          |
| 1 s                                |                    |                          |
| 1.0113272238                       | 1.0000000000       |                          |
| 1 s                                |                    |                          |
| 0.14919852089                      | 1.0000000000       |                          |
| 1 s                                |                    |                          |
| 0.51441872981E-01                  | 1.0000000000       |                          |
| 6 p                                |                    |                          |
| 2205.3508534                       | 0.23356240448E-02  |                          |
| 522.35300699                       | 0.19031022634E-01  |                          |
| 167.73055542                       | 0.89955758675E-01  |                          |
| 62.670045373                       | 0.26113248631      |                          |
| 25.109749456                       | 0.42348448173      |                          |
| 10.225142681                       | 0.24618926885      |                          |
| 3 p                                |                    |                          |
| 40.713442521                       | -0.30029667592E-01 |                          |
| 5.6247090696                       | 0.55575254864      |                          |
| 2.2279949116                       | 0.95581013442      |                          |
| 1 p                                |                    |                          |

```

0.83354741691      1.0000000000
  1 p
0.16245500000     1.0000000000
  1 p
0.47769000000E-01 1.0000000000
  4 d
  88.554315311     0.12728170015E-01
  25.721525557     0.79394499843E-01
  9.1278367624     0.24491506805
  3.4312364064     0.40390526479
  1 d
  1.2308920645     0.40158491145
  1 d
0.39031845112     0.21579805034
  1 d
0.12400000000     0.0000000000
  1 f
  1.4330000000     1.0000000000
  1 f
  5.6940000000     1.0000000000
  1 g
  3.6170000000     1.0000000000
*
*
ga def2-TZVPP
# ga      (17s12p8d1f) / [6s5p4d1f]      {842111/63111/5111/1}
*
  8 s
  435548.66254     0.23646329650E-03
  65289.589031     0.18335271776E-02
  14858.784256     0.95371863081E-02
  4205.9734729     0.38803412468E-01
  1369.6416431     0.12661604848
  492.30348905     0.30175310292
  191.41923233     0.43543934218
  75.840558665     0.23282363780
  4 s
  474.30810613     -0.26743707958E-01
  147.10297560     -0.12654657542
  23.982599435     0.58840346839
  10.298230094     0.56324271589
  2 s
  16.050381430     -0.24516439508
  2.6988468784     0.74578049593
  1 s
  1.1428588736     1.0000000000
  1 s
0.20217652251     1.0000000000
  1 s
0.71980152032E-01 1.0000000000
  6 p
  2432.0171070     0.22434065928E-02
  576.12049582     0.18342265336E-01
  185.11584354     0.87279697167E-01
  69.246572556     0.25684868351
  27.818107777     0.42398378107
  11.420229938     0.25701340043
  3 p
  42.819661530     -0.19326519119E-01
  6.3885901000     0.31571386917

```

|                                |                       |
|--------------------------------|-----------------------|
| 2.6698993326                   | 0.57617792822         |
| 1 p                            |                       |
| 1.0781783834                   | 1.0000000000          |
| 1 p                            |                       |
| 0.22796559371                  | 1.0000000000          |
| 1 p                            |                       |
| 0.62836234833E-01              | 1.0000000000          |
| 5 d                            |                       |
| 103.92331829                   | 0.11464613652E-01     |
| 30.371094389                   | 0.73625747383E-01     |
| 10.872078097                   | 0.23505107382         |
| 4.1549137954                   | 0.40318563513         |
| 1.5345659145                   | 0.40824748152         |
| 1 d                            |                       |
| 0.51114263830                  | 0.20502439263         |
| 1 d                            |                       |
| 0.30622000000                  | 1.0000000000          |
| 1 d                            |                       |
| 0.11391309000                  | 1.0000000000          |
| 1 f                            |                       |
| 0.30996095000                  | 1.0000000000          |
| *                              |                       |
| *                              |                       |
| ge def2-TZVPP                  |                       |
| # ge (17s12p8d1f) / [6s5p4d1f] | {842111/63111/5111/1} |
| *                              |                       |
| 8 s                            |                       |
| 466115.00592                   | 0.22487264660E-03     |
| 69875.420762                   | 0.17435426729E-02     |
| 15903.276716                   | 0.90691482206E-02     |
| 4501.8233453                   | 0.36906174685E-01     |
| 1466.0570924                   | 0.12050167907         |
| 527.07841728                   | 0.28748641703         |
| 205.00395074                   | 0.41622321885         |
| 81.251596065                   | 0.22397845695         |
| 4 s                            |                       |
| 505.74661282                   | -0.25184609291E-01    |
| 156.96593744                   | -0.11898929721        |
| 25.761448176                   | 0.54930135870         |
| 11.106654687                   | 0.52939309129         |
| 2 s                            |                       |
| 17.272059104                   | -0.22854595728        |
| 2.9438289048                   | 0.68377930317         |
| 1 s                            |                       |
| 1.2839164916                   | 1.0000000000          |
| 1 s                            |                       |
| 0.25873337445                  | 1.0000000000          |
| 1 s                            |                       |
| 0.93524913177E-01              | 1.0000000000          |
| 6 p                            |                       |
| 2633.9346241                   | 0.22143925310E-02     |
| 624.00161628                   | 0.18140899141E-01     |
| 200.58528404                   | 0.86632184922E-01     |
| 75.097081525                   | 0.25649020592         |
| 30.214388474                   | 0.42658611262         |
| 12.440087567                   | 0.26200527313         |
| 3 p                            |                       |
| 45.981316002                   | -0.20321767678E-01    |
| 6.9945654416                   | 0.32013744527         |
| 2.9686001327                   | 0.59051014555         |



```

1 p
1.2320988495      1.0000000000
1 p
0.28981614974    1.0000000000
1 p
0.85564606447E-01  1.0000000000
5 d
119.44887581     0.10586544521E-01
35.062915293     0.69601280945E-01
12.636924529     0.22807035287
4.8888672922     0.40301067220
1.8453195392     0.41304847015
1 d
0.63571158892    0.19639209740
1 d
0.35492132000    1.0000000000
1 d
0.13155709000    1.0000000000
1 f
0.36210645000    1.0000000000
*
*
as def2-TZVPP
# as      (17s13p8d1f) / [6s5p4d1f]      {842111/64111/5111/1}
*
8 s
498032.42158     0.22740196900E-03
74656.868743     0.17632816413E-02
16990.960004     0.91728040381E-02
4809.6200321     0.37337829344E-01
1566.2887055     0.12199536117
563.21360499     0.29137475324
219.11179978     0.42326351479
86.866061030     0.22921464278
4 s
538.19512479     -0.25254197297E-01
167.14850224     -0.11915461115
27.605517159     0.54628495980
11.947858521     0.53001520976
2 s
18.538023133     -0.23479188136
3.2018985739     0.69167053428
1 s
1.4356522077     1.0000000000
1 s
0.31837805200    1.0000000000
1 s
0.11622632186    1.0000000000
6 p
2678.9421546     0.23318955287E-02
634.61765840     0.19042149977E-01
203.93967606     0.90229744913E-01
76.323890369     0.26169037693
30.664124943     0.41857168155
12.505056732     0.23447830190
4 p
49.256229549     -0.21235539870E-01
7.7274891466     0.30470206668
3.5410493476     0.52888373107
1.6985585501     0.37272250955

```

```

1 p
0.76848071044      1.0000000000
1 p
0.30050823260      1.0000000000
1 p
0.98190639437E-01  1.0000000000
5 d
135.33289305       0.99291144106E-02
39.860212744       0.66568843496E-01
14.446428359       0.22275768307
5.6432900356       0.40309224382
2.1668188623       0.41671667946
1 d
0.76514970569      0.18935502288
1 d
0.42434653000      1.0000000000
1 d
0.16331527000      1.0000000000
1 f
0.43271941000      1.0000000000
*
*
se def2-TZVPP
# se      (17s13p8d1f) / [6s5p4d1f]      {842111/64111/5111/1}
*
8 s
531071.66696       0.24108973168E-03
79603.044117       0.18696431441E-02
18115.844240       0.97271616536E-02
5127.8923194       0.39604793031E-01
1669.9130839       0.12948855136
600.57534527       0.30959437289
233.70021247       0.45115769216
92.672443932       0.24579189033
4 s
571.57513675       -0.26895707881E-01
177.63686375       -0.12670989353
29.517767052       0.57699001719
12.824399795       0.56369075408
2 s
19.848235841       -0.25132415534
3.4744018486       0.72905416980
1 s
1.5988910849       1.0000000000
1 s
0.38333469387      1.0000000000
1 s
0.14049742459      1.0000000000
6 p
2815.3500566       0.25569026854E-02
666.92558298       0.20874026901E-01
214.34213188       0.98772096250E-01
80.246687942       0.28471821221
32.251081288       0.45003584934
13.106432562       0.24416091055
4 p
53.366108516       -0.21558456273E-01
8.1827777195       0.32662310638
3.6239945672       0.57740499319
1.6341591401       0.34301320826

```

```

1 p
0.58418320228      1.0000000000
1 p
0.23966269279      1.0000000000
1 p
0.88785134803E-01  1.0000000000
5 d
151.82910279       0.93970276988E-02
44.839992523       0.64086503991E-01
16.328999510       0.21834238004
6.4305057612       0.40314789649
2.5048025169       0.41966491490
1 d
0.90271148434      0.18366663432
1 d
0.47683613000      1.0000000000
1 d
0.18535160000      1.0000000000
1 f
0.48866905000      1.0000000000
*
*
br def2-TZVPP
# br      (17s13p8d1f) / [6s5p4d1f]      {842111/64111/5111/1}
*
8 s
565073.25256       0.23660314690E-03
84701.723179       0.18348332508E-02
19276.271900       0.95465849860E-02
5456.4284576       0.38877142153E-01
1776.9503500       0.12718314231
639.19398276       0.30437662191
248.78823961       0.44490940497
98.678305494       0.24381643058
4 s
606.07824568       -0.26527158709E-01
188.45598484       -0.12484584809
31.497144506       0.56468683559
13.736008320       0.55555268564
2 s
21.203212766       -0.24940920493
3.7616420178       0.71213119743
1 s
1.7735933962       1.0000000000
1 s
0.45197413664       1.0000000000
1 s
0.16613377099       1.0000000000
6 p
3019.6955723       0.24971049798E-02
715.35481126       0.20419267596E-01
229.98328751       0.96897148309E-01
86.167844615       0.28053901252
34.667870802       0.44606390473
14.113870307       0.24410073923
4 p
57.085653082       -0.21855950710E-01
8.8193845840       0.32707075320
3.9340302872       0.57855229520
1.7998830384       0.33570987698

```

|                                |                       |  |
|--------------------------------|-----------------------|--|
| 1 p                            |                       |  |
| 0.66899410512                  | 1.0000000000          |  |
| 1 p                            |                       |  |
| 0.27136238231                  | 1.0000000000          |  |
| 1 p                            |                       |  |
| 0.10083790243                  | 1.0000000000          |  |
| 5 d                            |                       |  |
| 168.85370257                   | 0.89663981988E-02     |  |
| 49.977949919                   | 0.62062059316E-01     |  |
| 18.274913338                   | 0.21474732384         |  |
| 7.2455694631                   | 0.40335336746         |  |
| 2.8562315025                   | 0.42208813080         |  |
| 1 d                            |                       |  |
| 1.0459621144                   | 0.17874813267         |  |
| 1 d                            |                       |  |
| 0.56865655000                  | 1.0000000000          |  |
| 1 d                            |                       |  |
| 0.22031490000                  | 1.0000000000          |  |
| 1 f                            |                       |  |
| 0.57083312000                  | 1.0000000000          |  |
| *                              |                       |  |
| *                              |                       |  |
| kr def2-TZVPP                  |                       |  |
| # kr (17s13p8d1f) / [6s5p4d1f] | {842111/64111/5111/1} |  |
| *                              |                       |  |
| 8 s                            |                       |  |
| 600250.97575                   | 0.23740610399E-03     |  |
| 89976.650781                   | 0.18410240539E-02     |  |
| 20476.814225                   | 0.95795580699E-02     |  |
| 5796.1554078                   | 0.39020650488E-01     |  |
| 1887.5913196                   | 0.12772645628         |  |
| 679.11458519                   | 0.30596521300         |  |
| 264.38244511                   | 0.44857474437         |  |
| 104.88368574                   | 0.24722957327         |  |
| 4 s                            |                       |  |
| 641.47370764                   | -0.26745279805E-01    |  |
| 199.57524820                   | -0.12571122567        |  |
| 33.545462954                   | 0.56483736390         |  |
| 14.683955144                   | 0.55972765539         |  |
| 2 s                            |                       |  |
| 22.603101860                   | -0.25298771800        |  |
| 4.0650682991                   | 0.70992159965         |  |
| 1 s                            |                       |  |
| 1.9611027060                   | 1.0000000000          |  |
| 1 s                            |                       |  |
| 0.52465147979                  | 1.0000000000          |  |
| 1 s                            |                       |  |
| 0.19332399511                  | 1.0000000000          |  |
| 6 p                            |                       |  |
| 3232.9589614                   | 0.24885607974E-02     |  |
| 765.96442694                   | 0.20379007428E-01     |  |
| 246.33940810                   | 0.96977188584E-01     |  |
| 92.365283041                   | 0.28199960954         |  |
| 37.199509551                   | 0.45116254358         |  |
| 15.172166534                   | 0.24917131496         |  |
| 4 p                            |                       |  |
| 60.931321698                   | -0.22173603519E-01    |  |
| 9.4792600646                   | 0.32838462778         |  |
| 4.2564686326                   | 0.58124997120         |  |
| 1.9729313762                   | 0.32863541783         |  |

```

1 p
0.76337108716      1.0000000000
1 p
0.30943625526      1.0000000000
1 p
0.11569704458      1.0000000000
5 d
186.41760904       0.86120284601E-02
55.274124345       0.60394406304E-01
20.283219120       0.21181331869
8.0884536976       0.40366293413
3.2214033853       0.42402860686
1 d
1.1952170102       0.17441742274
1 d
0.64800000000      1.0000000000
1 d
0.25100000000      1.0000000000
1 f
0.62800000000      1.0000000000
*
*
rb def2-TZVPP
# rb      (7s7p3d1f) / [6s4p3d1f]      {211111/4111/111/1}
*
2 s
7.4744618040       0.26997866363
6.7296180594       -0.42629251814
1 s
2.7816640004       1.0000000000
1 s
0.53452175148      1.0000000000
1 s
0.22368793034      1.0000000000
1 s
0.32410407052E-01  1.0000000000
1 s
0.14171047424E-01  1.0000000000
4 p
5.6720643194       0.48114224135E-01
3.3320183956       -0.18485131426
0.80150054910      0.42811864954
0.36302220227      0.58673165411
1 p
0.15733924392      1.0000000000
1 p
0.40000000000E-01  1.0000000000
1 p
0.16000000000E-01  1.0000000000
1 d
0.25907866956      0.76806746340E-01
1 d
0.42507438045E-01  0.37846160487
1 d
0.11909276840E-01  1.0000000000
1 f
0.85245000000      0.0000000000
*
rb def2-ecp
*

```

```

ncore = 28          lmax = 3
# coefficient      r^n      exponent
f
-12.3169000      2          3.8431140
s-f
 89.5001980      2          5.0365510
 0.4937610       2          1.9708490
12.3169000       2          3.8431140
p-f
 58.5689740      2          4.2583410
 0.4317910       2          1.4707090
12.3169000       2          3.8431140
d-f
 26.2248980      2          3.0231270
 0.9628390       2          0.6503830
12.3169000       2          3.8431140
*
*
sr def2-TZVPP
# sr (7s7p5d1f) / [6s4p3d1f] {211111/4111/311/1}
*
 2 s
10.0000000000    -0.18530550262
 8.5000000000    0.33970355376
 1 s
 3.0057048856    1.00000000000
 1 s
 0.61161287650   1.00000000000
 1 s
 0.27393841217   1.00000000000
 1 s
 0.57435564563E-01 1.00000000000
 1 s
 0.23338198665E-01 1.00000000000
 4 p
 7.5883077869    0.33731690287E-01
 3.6731307392    -0.20523185005
 0.90496618455   0.49209972665
 0.43310256408   0.62105296512
 1 p
 0.20222168964   1.00000000000
 1 p
 0.72000000000E-01 1.00000000000
 1 p
 0.25000000000E-01 1.00000000000
 3 d
 3.6180810000    -0.75010000000E-02
 0.99665600000   0.10809800000
 0.39073500000   0.27854000000
 1 d
 0.12277000000   1.00000000000
 1 d
 0.36655000000E-01 1.00000000000
 1 f
 0.99540000000   0.00000000000
*
sr def2-ecp
*
ncore = 28          lmax = 3
# coefficient      r^n      exponent

```

|     |             |   |           |
|-----|-------------|---|-----------|
| f   | -15.8059920 | 2 | 4.6339750 |
| s-f | 135.4794300 | 2 | 7.4000740 |
|     | 17.5344630  | 2 | 3.6063790 |
|     | 15.8059920  | 2 | 4.6339750 |
| p-f | 88.3597090  | 2 | 6.4848680 |
|     | 15.3943720  | 2 | 3.2880530 |
|     | 15.8059920  | 2 | 4.6339750 |
| d-f | 29.8889870  | 2 | 4.6228410 |
|     | 6.6594140   | 2 | 2.2469040 |
|     | 15.8059920  | 2 | 4.6339750 |

\*

\*

y def2-TZVPP

# y (7s7p5d2f1g) / [6s4p3d2f1g] {211111/4111/311/11/1}

\*

|                   |                    |  |
|-------------------|--------------------|--|
| 2 s               |                    |  |
| 10.000000000      | -0.17487686796     |  |
| 8.500000000       | 0.34152345084      |  |
| 1 s               |                    |  |
| 3.3653905454      | 1.0000000000       |  |
| 1 s               |                    |  |
| 0.68860679385     | 1.0000000000       |  |
| 1 s               |                    |  |
| 0.31191502936     | 1.0000000000       |  |
| 1 s               |                    |  |
| 0.70326042567E-01 | 1.0000000000       |  |
| 1 s               |                    |  |
| 0.27733859327E-01 | 1.0000000000       |  |
| 4 p               |                    |  |
| 8.0554093616      | 0.36410978939E-01  |  |
| 4.0163458751      | -0.20872572547     |  |
| 1.0232915404      | 0.48956929335      |  |
| 0.49843561636     | 0.60611943833      |  |
| 1 p               |                    |  |
| 0.23307661842     | 1.0000000000       |  |
| 1 p               |                    |  |
| 0.80000000000E-01 | 1.0000000000       |  |
| 1 p               |                    |  |
| 0.27000000000E-01 | 1.0000000000       |  |
| 3 d               |                    |  |
| 3.9030833060      | -0.98209792625E-02 |  |
| 1.1363234302      | 0.19183629664      |  |
| 0.45617043877     | 0.40597788539      |  |
| 1 d               |                    |  |
| 0.17470950748     | 1.0000000000       |  |
| 1 d               |                    |  |
| 0.61978796638E-01 | 1.0000000000       |  |
| 1 f               |                    |  |
| 0.38611000000     | 1.0000000000       |  |
| 1 f               |                    |  |
| 0.10766000000     | 1.0000000000       |  |
| 1 g               |                    |  |
| 0.11149000000     | 1.0000000000       |  |

\*

y def2-ecp

\*

```

ncore = 28          lmax = 3
#      coefficient   r^n      exponent
f      -19.1221981   2          6.5842120
      -2.4363754    2          3.2921060
s-f    135.1538441   2          7.4880494
      15.5524413    2          3.7440247
      19.1221981    2          6.5842120
      2.4363754     2          3.2921060
p-f    87.7849917    2          6.4453772
      11.5640660    2          3.2226886
      19.1221981    2          6.5842120
      2.4363754     2          3.2921060
d-f    29.7010007    2          4.6584472
      5.5399685     2          2.3292236
      19.1221981    2          6.5842120
      2.4363754     2          3.2921060
*
*
zr def2-TZVPP
# zr      (7s7p5d2f1g) / [6s4p3d2f1g]      {211111/4111/311/11/1}
*
  2 s
  11.000000000    -0.19075595257
  9.5000000000    0.33895588754
  1 s
  3.6383667759    1.0000000000
  1 s
  0.76822026698    1.0000000000
  1 s
  0.34036824036    1.0000000000
  1 s
  0.75261298085E-01  1.0000000000
  1 s
  0.30131404705E-01  1.0000000000
  4 p
  8.6066305543     0.40404260236E-01
  4.4400979958    -0.21187745201
  1.1281026946     0.49164266891
  0.54346076310    0.57303370658
  1 p
  0.25022406048    1.0000000000
  1 p
  0.85000000000E-01  1.0000000000
  1 p
  0.29000000000E-01  1.0000000000
  3 d
  4.5567957795    -0.96190569023E-02
  1.2904939797     0.20569990155
  0.51646987222    0.41831381851
  1 d
  0.19349797794    1.0000000000
  1 d
  0.67309809967E-01  1.0000000000
  1 f
  0.65322000000    1.0000000000
  1 f

```



```

0.18293000000      1.0000000000
  1 g
0.28989000000      1.0000000000
*
zr def2-ecp
*
  ncore =    28          lmax =    3
#   coefficient   r^n      exponent
f
    -21.0937760     2        7.5400000
    -3.0806943     2        3.7700000
s-f
    150.2675911     2        8.2000000
    18.9762165     2        4.0897278
    21.0937760     2        7.5400000
    3.0806943     2        3.7700000
p-f
    99.6221237     2        7.1100000
    14.1687333     2        3.5967980
    21.0937760     2        7.5400000
    3.0806943     2        3.7700000
d-f
    35.0451235     2        5.3500000
    6.1112595     2        2.4918215
    21.0937760     2        7.5400000
    3.0806943     2        3.7700000
*
*
nb def2-TZVPP
# nb      (7s7p5d2f1g) / [6s4p3d2f1g]      {211111/4111/311/11/1}
*
  2 s
  12.000000000      -0.20219507530
  10.500000000      0.33640105939
  1 s
  3.9276062854      1.0000000000
  1 s
  0.85976543258      1.0000000000
  1 s
  0.39074087505      1.0000000000
  1 s
  0.86387259879E-01  1.0000000000
  1 s
  0.32906200326E-01  1.0000000000
  4 p
  9.2056285646      0.43347689874E-01
  4.8679632125      -0.21302479233
  1.2442155792      0.48102127136
  0.60390590312      0.53917858960
  1 p
  0.27967675553      1.0000000000
  1 p
  0.90000000000E-01  1.0000000000
  1 p
  0.30000000000E-01  1.0000000000
  3 d
  4.6170975867      -0.13574476955E-01
  1.5663438480      0.20374310496
  0.66952425826      0.42997453105
  1 d

```

```

0.27140946867      1.0000000000
  1 d
0.10054426592      1.0000000000
  1 f
0.91801000000      1.0000000000
  1 f
0.25820000000      1.0000000000
  1 g
0.46829000000      1.0000000000
*
nb def2-ecp
*
  ncore =      28          lmax =      3
#      coefficient      r^n      exponent
f
      -22.9295500      2          8.4900000
      -3.6663099      2          4.2500000
s-f
      165.1791435      2          8.9000000
      21.9929744      2          4.4300000
      22.9295500      2          8.4900000
      3.6663099      2          4.2500000
p-f
      111.7944145      2          7.7700000
      16.6334833      2          3.9600000
      22.9295500      2          8.4900000
      3.6663099      2          4.2500000
d-f
      38.1122488      2          6.0500000
      8.0391673      2          2.8400000
      22.9295500      2          8.4900000
      3.6663099      2          4.2500000
*
*
mo def2-TZVPP
# mo      (7s7p5d2f1g) / [6s4p3d2f1g]      {211111/4111/311/11/1}
*
  2 s
  14.000000000      -0.22490043406
  12.500000000      0.33151248555
  1 s
  4.0921501803      1.0000000000
  1 s
  0.97053602586      1.0000000000
  1 s
  0.44217620170      1.0000000000
  1 s
  0.92915024334E-01      1.0000000000
  1 s
  0.35016314389E-01      1.0000000000
  4 p
  8.8931117915      0.699944449475E-01
  5.4689112270      -0.23547141883
  1.3548473007      0.46315460007
  0.65494867461      0.48820184710
  1 p
  0.30428197472      1.0000000000
  1 p
  0.10000000000      1.0000000000
  1 p

```

```

0.330000000000E-01  1.0000000000
  3 d
  5.0044445497      -0.21587364862E-01
  1.7736823324      0.20958680086
0.76950591696      0.43730880599
  1 d
0.31530878939      1.0000000000
  1 d
0.11754374390      1.0000000000
  1 f
  1.1805100000      1.0000000000
  1 f
0.33348000000      1.0000000000
  1 g
0.64670000000      1.0000000000
*
mo def2-ecp
*
  ncore =    28          lmax =    3
#      coefficient      r^n      exponent
f
      -24.8051771      2          9.4500000
      -4.1537815      2          4.7200000
s-f
      180.1031085      2          9.7145938
      24.9972279      2          4.6805004
      24.8051771      2          9.4500000
      4.1537815      2          4.7200000
p-f
      123.7727523      2          8.1421366
      19.5302280      2          4.6259863
      24.8051771      2          9.4500000
      4.1537815      2          4.7200000
d-f
      48.3750223      2          6.6184148
      8.8920527      2          3.2487516
      24.8051771      2          9.4500000
      4.1537815      2          4.7200000
*
*
tc def2-TZVPP
# tc      (7s7p5d2f1g) / [6s4p3d2f1g]      {211111/4111/311/11/1}
*
  2 s
  15.000000000      -0.19945408941
  12.910581694      0.33689922245
  1 s
  4.4493321158      1.0000000000
  1 s
  1.0548409451      1.0000000000
  1 s
0.47909677246      1.0000000000
  1 s
0.99124162989E-01  1.0000000000
  1 s
0.36882799789E-01  1.0000000000
  4 p
  10.027138011      0.61481602710E-01
  5.8463419741      -0.23600729385
  1.4968345491      0.47746483995

```

```

0.72934632066      0.50731543496
 1 p
0.33913558879      1.00000000000
 1 p
0.11000000000      1.00000000000
 1 p
0.35000000000E-01  1.00000000000
 3 d
 5.0906268699      -0.32176405405E-01
 2.0156178510      0.21280802536
0.88113887240      0.44403309175
 1 d
0.36427094833      1.00000000000
 1 d
0.13678402297      1.00000000000
 1 f
 1.4406400000      1.00000000000
 1 f
0.40875000000      1.00000000000
 1 g
0.82510000000      1.00000000000
*
tc def2-ecp
*
  ncore =      28          lmax =      3
#   coefficient  r^n      exponent
f
  -26.5624475    2          10.4000000
  -4.5856805    2          5.2000000
s-f
  195.1591659   2          10.4223462
  28.0926033   2          5.0365160
  26.5624475    2          10.4000000
  4.5856805    2          5.2000000
p-f
  135.2845662   2          8.9504494
  21.8065043   2          4.8544394
  26.5624475    2          10.4000000
  4.5856805    2          5.2000000
d-f
  54.3297294    2          6.9456968
  11.1550679   2          3.9705849
  26.5624475    2          10.4000000
  4.5856805    2          5.2000000
*
*
ru def2-TZVPP
# ru      (7s7p5d2f1g) / [6s4p3d2f1g]      {211111/4111/311/11/1}
*
  2 s
  16.000000000    -0.20634002919
  13.910581694    0.33550437725
  1 s
  4.7967971407    1.00000000000
  1 s
  1.1555425594    1.00000000000
  1 s
  0.52455741182    1.00000000000
  1 s
  0.10734572646    1.00000000000

```

```

1 s
0.39432760192E-01 1.0000000000
4 p
11.187208671 0.53225073263E-01
6.2477688734 -0.22731662050
1.6279472859 0.47869486056
0.79326493538 0.50213311567
1 p
0.36707276865 1.0000000000
1 p
0.11500000000 1.0000000000
1 p
0.37000000000E-01 1.0000000000
3 d
5.7341846619 -0.35266111560E-01
2.2483686294 0.21802502222
0.98376978359 0.44709565013
1 d
0.40379445583 1.0000000000
1 d
0.14978618173 1.0000000000
1 f
1.7077900000 1.0000000000
1 f
0.48442000000 1.0000000000
1 g
1.0093000000 1.0000000000
*
ru def2-ecp
*
ncore = 28 lmax = 3
# coefficient r^n exponent
f
-28.3406163 2 11.3600000
-4.9446292 2 5.6800000
s-f
209.8229712 2 11.1052693
30.6547264 2 5.4147454
28.3406163 2 11.3600000
4.9446292 2 5.6800000
p-f
146.3361823 2 9.7712707
24.1278772 2 5.0739908
28.3406163 2 11.3600000
4.9446292 2 5.6800000
d-f
67.5158967 2 7.6714231
9.8701041 2 4.1365647
28.3406163 2 11.3600000
4.9446292 2 5.6800000
*
*
rh def2-TZVPP
# rh (7s7p6d2f1g) / [6s4p3d2f1g] {211111/4111/411/11/1}
*
2 s
17.000000000 -0.16690803139
13.910581694 0.34235001652
1 s
5.2481265288 1.0000000000

```

```

1 s
1.2262575928      1.0000000000
1 s
0.53930216349    1.0000000000
1 s
0.10130730377    1.0000000000
1 s
0.37124139005E-01  1.0000000000
4 p
11.767103631     0.59494859388E-01
6.7485133083     -0.23735853477
1.7502679834     0.49019334303
0.84321166133    0.50623933751
1 p
0.38295544759    1.0000000000
1 p
0.11500000000    1.0000000000
1 p
0.37000000000E-01  1.0000000000
4 d
19.857830136     0.66960778187E-02
10.061378139     -0.21981738213E-01
2.2619546477     0.37918706236
0.97098845035    0.67289976592
1 d
0.38391195297    1.0000000000
1 d
0.13537026904    1.0000000000
1 f
1.9750700000     1.0000000000
1 f
0.56009000000    1.0000000000
1 g
1.1935000000     1.0000000000
*
rh def2-ecp
*
ncore = 28      lmax = 3
#      coefficient  r^n      exponent
f
      -30.0934557   2        12.3100000
      -5.2184819   2         6.1600000
s-f
      225.3477535   2         11.7200000
      32.8231890    2         5.8200000
      30.0934557   2         12.3100000
      5.2184819    2         6.1600000
p-f
      158.7094116   2         10.4200000
      26.4441005    2         5.4500000
      30.0934557   2         12.3100000
      5.2184819    2         6.1600000
d-f
      62.7586257    2         8.8200000
      10.9787195    2         3.8700000
      30.0934557   2         12.3100000
      5.2184819    2         6.1600000
*
*
pd def2-TZVPP

```

# pd (7s7p6d2f1g) / [6s4p3d2f1g] {211111/4111/411/11/1}

```

*
  2 s
18.000000000 -0.16605388598
14.662134308 0.34899955055
  1 s
  5.6388709265 1.0000000000
  1 s
  1.3198953252 1.0000000000
  1 s
0.57817908509 1.0000000000
  1 s
0.10352166239 1.0000000000
  1 s
0.37548442674E-01 1.0000000000
  4 p
  12.552899300 0.61728998206E-01
  7.2444496380 -0.24178626753
  1.8905941078 0.49453200915
0.90737168760 0.50454362626
  1 p
0.40877210813 1.0000000000
  1 p
0.11500000000 1.0000000000
  1 p
0.37000000000E-01 1.0000000000
  4 d
  22.357457575 0.39559479546E-02
  10.682526382 -0.14039011601E-01
  2.4858232550 0.24219476776
  1.0735333903 0.42580283281
  1 d
0.42613842853 1.0000000000
  1 d
0.15046355385 1.0000000000
  1 f
  2.2424600000 1.0000000000
  1 f
0.63575000000 1.0000000000
  1 g
  1.3777000000 1.0000000000

```

\*  
pd def2-ecp

```

*
ncore = 28 lmax = 3
# coefficient r^n exponent
f
-31.9295543 2 13.2700000
-5.3982169 2 6.6300000
s-f
240.2290403 2 12.4300000
35.1719435 2 6.1707594
31.9295543 2 13.2700000
5.3982169 2 6.6300000
p-f
170.4172760 2 11.0800000
28.4721329 2 5.8295541
31.9295543 2 13.2700000
5.3982169 2 6.6300000
d-f

```

|            |   |            |
|------------|---|------------|
| 69.0138449 | 2 | 9.5100000  |
| 11.7508616 | 2 | 4.1397811  |
| 31.9295543 | 2 | 13.2700000 |
| 5.3982169  | 2 | 6.6300000  |

\*  
\*

ag def2-TZVPP

# ag (7s7p6d2f1g) / [6s4p3d2f1g] {211111/4111/411/11/1}

\*

|                   |                    |  |
|-------------------|--------------------|--|
| 2 s               |                    |  |
| 19.000000000      | -0.16600104141     |  |
| 15.428199933      | 0.35665095918      |  |
| 1 s               |                    |  |
| 6.0553507268      | 1.0000000000       |  |
| 1 s               |                    |  |
| 1.4162368935      | 1.0000000000       |  |
| 1 s               |                    |  |
| 0.61758635858     | 1.0000000000       |  |
| 1 s               |                    |  |
| 0.10474197431     | 1.0000000000       |  |
| 1 s               |                    |  |
| 0.37685106264E-01 | 1.0000000000       |  |
| 4 p               |                    |  |
| 13.188180180      | 0.66928737147E-01  |  |
| 7.7952789138      | -0.24735235409     |  |
| 2.0351571912      | 0.49154280216      |  |
| 0.98093914842     | 0.49741609006      |  |
| 1 p               |                    |  |
| 0.44451179958     | 1.0000000000       |  |
| 1 p               |                    |  |
| 0.13000000000     | 1.0000000000       |  |
| 1 p               |                    |  |
| 0.41200000000E-01 | 1.0000000000       |  |
| 4 d               |                    |  |
| 25.784397351      | 0.35645063082E-02  |  |
| 11.396636755      | -0.12984262784E-01 |  |
| 2.7345581361      | 0.24108826548      |  |
| 1.1873583605      | 0.42412330744      |  |
| 1 d               |                    |  |
| 0.47316910566     | 1.0000000000       |  |
| 1 d               |                    |  |
| 0.16746017986     | 1.0000000000       |  |
| 1 f               |                    |  |
| 2.5100300000      | 1.0000000000       |  |
| 1 f               |                    |  |
| 0.71142000000     | 1.0000000000       |  |
| 1 g               |                    |  |
| 1.5619000000      | 1.0000000000       |  |

\*

ag def2-ecp

\*

|         |             |        |            |
|---------|-------------|--------|------------|
| ncore = | 28          | lmax = | 3          |
| #       | coefficient | r^n    | exponent   |
| f       | -33.6899201 | 2      | 14.2200000 |
|         | -5.5311202  | 2      | 7.1100000  |
| s-f     | 255.1393645 | 2      | 13.1300000 |
|         | 36.8661215  | 2      | 6.5100000  |
|         | 33.6899201  | 2      | 14.2200000 |



|     |             |   |            |
|-----|-------------|---|------------|
|     | 5.5311202   | 2 | 7.1100000  |
| p-f | 182.1818687 | 2 | 11.7400000 |
|     | 30.3577515  | 2 | 6.2000000  |
|     | 33.6899201  | 2 | 14.2200000 |
|     | 5.5311202   | 2 | 7.1100000  |
| d-f | 73.7192609  | 2 | 10.2100000 |
|     | 12.5021171  | 2 | 4.3800000  |
|     | 33.6899201  | 2 | 14.2200000 |
|     | 5.5311202   | 2 | 7.1100000  |

\*

\*

cd def2-TZVPP

# cd (7s7p6d2f1g) / [6s4p3d2f1g] {211111/4111/411/11/1}

\*

|                   |                    |  |
|-------------------|--------------------|--|
| 2 s               |                    |  |
| 20.000000000      | -0.17401196927     |  |
| 16.309051661      | 0.37137277194      |  |
| 1 s               |                    |  |
| 6.4512709901      | 1.0000000000       |  |
| 1 s               |                    |  |
| 1.5350047390      | 1.0000000000       |  |
| 1 s               |                    |  |
| 0.68983631523     | 1.0000000000       |  |
| 1 s               |                    |  |
| 0.13475720977     | 1.0000000000       |  |
| 1 s               |                    |  |
| 0.47416874527E-01 | 1.0000000000       |  |
| 4 p               |                    |  |
| 14.000681404      | 0.69333062793E-01  |  |
| 8.3094019872      | -0.25420103681     |  |
| 2.2020058122      | 0.49200980368      |  |
| 1.0779246137      | 0.49702118131      |  |
| 1 p               |                    |  |
| 0.50111879846     | 1.0000000000       |  |
| 1 p               |                    |  |
| 0.16000000000     | 1.0000000000       |  |
| 1 p               |                    |  |
| 0.51600000000E-01 | 1.0000000000       |  |
| 4 d               |                    |  |
| 30.380789793      | 0.32545123835E-02  |  |
| 11.474551578      | -0.14212074843E-01 |  |
| 3.0507394903      | 0.24961756436      |  |
| 1.3622028524      | 0.44905635176      |  |
| 1 d               |                    |  |
| 0.56399409888     | 1.0000000000       |  |
| 1 d               |                    |  |
| 0.20916686535     | 1.0000000000       |  |
| 1 f               |                    |  |
| 2.8400100000      | 1.0000000000       |  |
| 1 f               |                    |  |
| 0.82048000000     | 1.0000000000       |  |
| 1 g               |                    |  |
| 1.7896000000      | 1.0000000000       |  |

\*

cd def2-ecp

\*

|               |     |          |   |
|---------------|-----|----------|---|
| ncore =       | 28  | lmax =   | 3 |
| # coefficient | r^n | exponent |   |

```

f
      -35.4766256    2      15.1847957
      -5.6176768    2      7.5923978
s-f
      270.0094832    2      13.8358689
      38.7673080     2      6.8572704
      35.4766256     2      15.1847957
      5.6176768      2      7.5923978
p-f
      193.8296294    2      12.4049710
      31.8965252     2      6.5677995
      35.4766256     2      15.1847957
      5.6176768      2      7.5923978
d-f
      79.1936470     2      10.8969253
      13.2308267     2      4.6411649
      35.4766256     2      15.1847957
      5.6176768      2      7.5923978
*
*
in def2-TZVPP
# in      (10s9p8d2f) / [6s5p3d2f]      {421111/33111/611/11}
*
  4 s
  847.79276774      0.12432052471E-03
  72.041054824      0.23600367607E-02
  41.061316522      -0.85588299453E-02
  12.407609713      0.62952032489
  2 s
  11.640316941      1.5543429200
  6.3695642727      0.67492488361
  1 s
  1.7063236353      1.0000000000
  1 s
  0.78666967936      1.0000000000
  1 s
  0.16965196873      1.0000000000
  1 s
  0.62074858667E-01  1.0000000000
  3 p
  268.28136685      0.11542193636E-03
  14.781553782      0.77779830292E-01
  8.8041476194      -0.28332389472
  3 p
  2.3717277227      0.47896111744
  1.1927065422      0.48293819961
  0.58352812041      0.16843883728
  1 p
  0.23280968310      1.0000000000
  1 p
  0.88674065208E-01  1.0000000000
  1 p
  0.33598828267E-01  1.0000000000
  6 d
  94.282575063      0.43652729696E-03
  19.716431102      0.63918753088
  19.600106824      -0.64663115577
  3.5643186737      0.21187579614
  1.7017801400      0.42129321741
  0.76456615531      0.38418127707

```

```

1 d
0.31826765584      1.0000000000
1 d
0.10000000000     1.0000000000
1 f
0.26415991000     1.0000000000
1 f
0.90000000000     1.0000000000
*
in def2-ecp
*
ncore =      28      lmax =      3
#      coefficient  r^n      exponent
f
      -13.7280780    2      12.5390560
      -18.2068660    2      12.5525610
s-f
      281.1223500    2      15.3928220
      61.9014700    2      8.0558640
      13.7280780    2      12.5390560
      18.2068660    2      12.5525610
p-f
      67.4621540    2      13.9286720
      134.9492500   2      13.3472340
      14.7461400    2      7.6141320
      29.6392620    2      7.3183650
      13.7280780    2      12.5390560
      18.2068660    2      12.5525610
d-f
      35.4932540    2      14.0347150
      53.1787730    2      14.5116160
      9.1772810     2      5.5505500
      12.3924100    2      5.0594150
      13.7280780    2      12.5390560
      18.2068660    2      12.5525610
*
*
sn def2-TZVPP
# sn      (10s9p8d2f) / [6s5p3d2f]      {421111/33111/611/11}
*
4 s
1577.0715931      0.17042767713E-03
235.26601078      0.81467057272E-03
38.206330645      -0.39057904293E-02
13.097031765      0.53245922343
2 s
11.681492759      1.5435287275
5.9647604361      0.76421510041
1 s
1.8891070740      1.0000000000
1 s
0.88514080630      1.0000000000
1 s
0.20500105152      1.0000000000
1 s
0.76748551032E-01  1.0000000000
3 p
221.55767496      0.31125177983E-03
21.084021433      0.31108097016E-01
8.7600138521      -0.27571560918

```

```

3 p
2.5912909722      0.45912328666
1.3426801157      0.49682867217
0.67732735829     0.18962377821
1 p
0.29418756752     1.00000000000
1 p
0.11863762052     1.00000000000
1 p
0.46215750632E-01 1.00000000000
6 d
108.33210154      0.46561853277E-03
23.703936630      0.54063163067E-01
22.339843906      -0.58928768877E-01
4.0874834028      0.19588500896
1.9737354146      0.42301799185
0.90158257692     0.39252716176
1 d
0.38237153649     1.00000000000
1 d
0.12000000000     1.00000000000
1 f
0.29392848500     1.00000000000
1 f
1.00000000000     1.00000000000
*
sn def2-ecp
*
ncore = 28          lmax = 3
# coefficient      r^n          exponent
f
-12.5763330       2            12.2823480
-16.5959440       2            12.2721500
s-f
279.9886820       2            17.4204140
62.3778100        2            7.6311550
12.5763330        2            12.2823480
16.5959440        2            12.2721500
p-f
66.1625230        2            16.1310240
132.1743960       2            15.6280770
16.3394170        2            7.3256080
32.4889590        2            6.9425190
12.5763330        2            12.2823480
16.5959440        2            12.2721500
d-f
36.3874410        2            15.5149760
54.5078410        2            15.1881600
8.6968230         2            5.4560240
12.8402080        2            5.3631050
12.5763330        2            12.2823480
16.5959440        2            12.2721500
*
*
sb def2-TZVPP
# sb (10s9p8d2f) / [6s5p3d2f] {421111/33111/611/11}
*
4 s
1612.4199933      0.28540380783E-03
238.84452097      0.13393778746E-02

```

|                   |                    |
|-------------------|--------------------|
| 23.998118809      | -0.49388154574E-01 |
| 15.193124213      | 0.43392227254      |
| 2 s               |                    |
| 11.736409733      | 0.92125519965      |
| 6.5259774794      | 0.79235280226      |
| 1 s               |                    |
| 2.0247451872      | 1.0000000000       |
| 1 s               |                    |
| 0.97113418587     | 1.0000000000       |
| 1 s               |                    |
| 0.24254333998     | 1.0000000000       |
| 1 s               |                    |
| 0.92206608177E-01 | 1.0000000000       |
| 3 p               |                    |
| 215.68393354      | 0.26051823221E-03  |
| 16.374479088      | 0.73728000195E-01  |
| 9.7216283345      | -0.27230028128     |
| 3 p               |                    |
| 2.7982643154      | 0.46472692374      |
| 1.4711045033      | 0.50364242075      |
| 0.75165385301     | 0.18706666294      |
| 1 p               |                    |
| 0.33168699849     | 1.0000000000       |
| 1 p               |                    |
| 0.13931606366     | 1.0000000000       |
| 1 p               |                    |
| 0.56399307526E-01 | 1.0000000000       |
| 6 d               |                    |
| 115.90312253      | 0.53140915051E-03  |
| 30.474233720      | 0.59411139166E-02  |
| 18.228418239      | -0.10563706947E-01 |
| 4.3291456646      | 0.20348177341      |
| 2.1294818496      | 0.42748378928      |
| 0.99682636692     | 0.38539560809      |
| 1 d               |                    |
| 0.43347239863     | 1.0000000000       |
| 1 d               |                    |
| 0.14000000000     | 1.0000000000       |
| 1 f               |                    |
| 0.32369706000     | 1.0000000000       |
| 1 f               |                    |
| 1.10000000000     | 1.0000000000       |

\*

sb def2-ecp

\*

| #   | ncore = 28 | lmax = 3 | coefficient | r^n | exponent   |
|-----|------------|----------|-------------|-----|------------|
| f   |            |          | -15.3668010 | 2   | 14.4449780 |
|     |            |          | -20.2961380 | 2   | 14.4492950 |
| s-f |            |          | 281.0715810 | 2   | 16.3308650 |
|     |            |          | 61.7166040  | 2   | 8.5565420  |
|     |            |          | 15.3668010  | 2   | 14.4449780 |
|     |            |          | 20.2961380  | 2   | 14.4492950 |
| p-f |            |          | 67.4573800  | 2   | 14.4703370 |
|     |            |          | 134.9335030 | 2   | 13.8161940 |
|     |            |          | 14.7163440  | 2   | 8.4249240  |
|     |            |          | 29.5185120  | 2   | 8.0927280  |

```

15.3668010      2      14.4449780
20.2961380      2      14.4492950
d-f
35.4478150      2      14.8863310
53.1434660      2      15.1463190
9.1792230       2      5.9082670
13.2402530      2      5.5943220
15.3668010      2      14.4449780
20.2961380      2      14.4492950
*
*
te def2-TZVPP
# te      (11s9p8d2f) / [6s5p3d2f]      {521111/33111/611/11}
*
5 s
6213.2001650    0.17392073280E-03
920.89640017    0.11933589842E-02
199.28042708    0.36256556777E-02
24.774233098    -0.59791033012E-01
14.838199169    0.95943203263
2 s
12.278761954    0.75942429936
6.3807845532    0.35331689542
1 s
2.2228405205    1.0000000000
1 s
1.0776043442    1.0000000000
1 s
0.28136649025    1.0000000000
1 s
0.10781573341    1.0000000000
3 p
204.29400852    0.40605406751E-03
18.208759358    0.60255451613E-01
9.9211024302    -0.27491671277
3 p
3.1441528685    0.43154849974
1.7220884031    0.55403079110
0.89098945714    0.24087311227
1 p
0.39804719568    1.0000000000
1 p
0.16538785242    1.0000000000
1 p
0.65082695586E-01 1.0000000000
6 d
121.51055249    0.63490629024E-03
32.968794396    0.61811936324E-02
19.249862451    -0.88929825218E-02
4.7198407254    0.20159884764
2.3428061416    0.42976049013
1.1135379412    0.38247126751
1 d
0.49200061510    1.0000000000
1 d
0.16000000000    1.0000000000
1 f
0.38255757000    1.0000000000
1 f
1.85000000000    1.0000000000

```

```

*
te def2-ecp
*
ncore = 28          lmax = 3
# coefficient      r^n      exponent
f
    -15.7454500    2        15.2061680
    -20.7424480    2        15.2017020
s-f
    281.0458430    2        16.8144730
    61.6206560    2        8.7935260
    15.7454500    2        15.2061680
    20.7424480    2        15.2017020
p-f
    67.4494640    2        14.8778010
    134.9043040   2        14.2697310
    14.6895470    2        8.7244350
    29.4150630    2        8.2915150
    15.7454500    2        15.2061680
    20.7424480    2        15.2017020
d-f
    35.4320570    2        15.2050080
    53.1356870    2        15.2258480
    9.0698020     2        6.0717690
    13.1223040    2        5.8047600
    15.7454500    2        15.2061680
    20.7424480    2        15.2017020
*
*
i def2-TZVPP
# i      (11s10p8d2f) / [6s5p3d2f]      {521111/34111/611/11}
*
5 s
5899.5791533      0.24188269271E-03
898.54238765      0.15474041742E-02
200.37237912      0.42836684457E-02
31.418053840      -0.39417936275E-01
15.645987838      0.96086691992
2 s
11.815741857      0.75961524091
6.4614458287      0.42495501835
1 s
2.3838067579      1.0000000000
1 s
1.1712089662      1.0000000000
1 s
0.32115875757      1.0000000000
1 s
0.12387919364      1.0000000000
3 p
197.30030547      0.73951226905E-03
20.061411349      0.66168450008E-01
9.7631460485      -0.28554662348
4 p
12.984316904      -0.49096186164E-01
3.6199503008      0.38914432482
2.0232273090      0.65610817262
1.0367490559      0.31803551647
1 p
0.45937816000      1.0000000000

```

```

1 p
0.19116532928      1.0000000000
1 p
0.74878813023E-01  1.0000000000
6 d
119.12671745      0.82596039573E-03
33.404240134      0.68377675770E-02
17.805918203      -0.10308158997E-01
4.8990510353      0.22670457658
2.4516753106      0.44180113937
1.1820693432      0.36775472225
1 d
0.52923110068      1.0000000000
1 d
0.17000000000      1.0000000000
1 f
0.44141808000      1.0000000000
1 f
2.18000000000      1.0000000000
*
i def2-ecp
*
ncore =      28      lmax =      3
#      coefficient      r^n      exponent
f
      -21.8420400      2      19.4586090
      -28.4681910      2      19.3492600
      -0.2437130      2      4.8237670
      -0.3208040      2      4.8843150
s-f
      49.9942930      2      40.0158350
      281.0253170      2      17.4297470
      61.5733260      2      9.0054840
      21.8420400      2      19.4586090
      28.4681910      2      19.3492600
      0.2437130      2      4.8237670
      0.3208040      2      4.8843150
p-f
      67.4428410      2      15.3554660
      134.8811370      2      14.9718330
      14.6750510      2      8.9601640
      29.3756660      2      8.2590960
      21.8420400      2      19.4586090
      28.4681910      2      19.3492600
      0.2437130      2      4.8237670
      0.3208040      2      4.8843150
d-f
      35.4395290      2      15.0689080
      53.1760570      2      14.5553220
      9.0671950      2      6.7186470
      13.2069370      2      6.4563930
      0.0893350      2      1.1917790
      0.0523800      2      1.2911570
      21.8420400      2      19.4586090
      28.4681910      2      19.3492600
      0.2437130      2      4.8237670
      0.3208040      2      4.8843150
*
*
xe def2-TZVPP

```



# xe (11s10p8d2f) / [6s5p3d2f] {521111/34111/611/11}

```
*
  5 s
  6420.2481656      0.25092173886E-03
  983.54530664     0.16251948178E-02
  219.43881364     0.46037106451E-02
  23.012587807    -0.14698707182
  18.048324490     0.57524870348
  2 s
  11.752550163     0.66038420156
  6.2390917199     0.38470524721
  1 s
  2.6257211320     1.0000000000
  1 s
  1.2905042943     1.0000000000
  1 s
  0.36204185060    1.0000000000
  1 s
  0.14069888091    1.0000000000
  3 p
  193.81432545     0.95394802497E-03
  21.725228086     0.57393353332E-01
  9.8891605641     -0.27974266640
  4 p
  13.960683826     -0.50950157807E-01
  4.0928947097     0.36669211800
  2.2546815460     0.72619456861
  1.1546596184     0.35555871740
  1 p
  0.52321923128    1.0000000000
  1 p
  0.21945569800    1.0000000000
  1 p
  0.86158996836E-01 1.0000000000
  6 d
  135.60300038     0.81873543290E-03
  38.727062692     0.60897654151E-02
  15.377328089     -0.92782985596E-02
  5.2602537686     0.22890785589
  2.6590627424     0.44434407051
  1.2938205124     0.36029482992
  1 d
  0.58050830139    1.0000000000
  1 d
  0.18000000000    1.0000000000
  1 f
  0.49652793000    1.0000000000
  1 f
  2.50000000000    1.0000000000
```

\*  
xe def2-ecp  
\*

```
ncore = 28          lmax = 3
# coefficient r^n    exponent
f          -23.0892950  2      20.8815570
           -30.0744750  2      20.7834430
           -0.2882270   2      5.2533890
           -0.3869240   2      5.3611880
```

s-f

|               |                         |                   |                   |
|---------------|-------------------------|-------------------|-------------------|
|               | 49.9979620              | 2                 | 40.0051840        |
|               | 281.0133030             | 2                 | 17.8122140        |
|               | 61.5382550              | 2                 | 9.3041500         |
|               | 23.0892950              | 2                 | 20.8815570        |
|               | 30.0744750              | 2                 | 20.7834430        |
|               | 0.2882270               | 2                 | 5.2533890         |
|               | 0.3869240               | 2                 | 5.3611880         |
| p-f           |                         |                   |                   |
|               | 67.4391420              | 2                 | 15.7017720        |
|               | 134.8747110             | 2                 | 15.2586080        |
|               | 14.6633000              | 2                 | 9.2921840         |
|               | 29.3547300              | 2                 | 8.5590030         |
|               | 23.0892950              | 2                 | 20.8815570        |
|               | 30.0744750              | 2                 | 20.7834430        |
|               | 0.2882270               | 2                 | 5.2533890         |
|               | 0.3869240               | 2                 | 5.3611880         |
| d-f           |                         |                   |                   |
|               | 35.4369080              | 2                 | 15.1856000        |
|               | 53.1957720              | 2                 | 14.2845000        |
|               | 9.0462320               | 2                 | 7.1218890         |
|               | 13.2236810              | 2                 | 6.9919630         |
|               | 0.0848530               | 2                 | 0.6239460         |
|               | 0.0441550               | 2                 | 0.6472840         |
|               | 23.0892950              | 2                 | 20.8815570        |
|               | 30.0744750              | 2                 | 20.7834430        |
|               | 0.2882270               | 2                 | 5.2533890         |
|               | 0.3869240               | 2                 | 5.3611880         |
| *             |                         |                   |                   |
| *             |                         |                   |                   |
| cs def2-TZVPP |                         |                   |                   |
| # cs          | (7s6p3d1f) / [5s3p3d1f] |                   | {31111/411/111/1} |
| *             |                         |                   |                   |
| 3 s           |                         |                   |                   |
|               | 5.8778113443            | 0.12859994983     |                   |
|               | 4.3631538286            | -0.34632569725    |                   |
|               | 1.8048475155            | 0.69930637051     |                   |
| 1 s           |                         |                   |                   |
|               | 0.37485237136           | 1.0000000000      |                   |
| 1 s           |                         |                   |                   |
|               | 0.16384858778           | 1.0000000000      |                   |
| 1 s           |                         |                   |                   |
|               | 0.27230462048E-01       | 1.0000000000      |                   |
| 1 s           |                         |                   |                   |
|               | 0.11991533212E-01       | 1.0000000000      |                   |
| 4 p           |                         |                   |                   |
|               | 4.2751856154            | 0.45723074174E-01 |                   |
|               | 1.9656663360            | -0.25019961976    |                   |
|               | 0.47689195212           | 0.55660850066     |                   |
|               | 0.21529749588           | 0.58218553406     |                   |
| 1 p           |                         |                   |                   |
|               | 0.91450850296E-01       | 1.0000000000      |                   |
| 1 p           |                         |                   |                   |
|               | 0.17592078473E-01       | 1.0000000000      |                   |
| 1 d           |                         |                   |                   |
|               | 0.27941471548           | 0.15040680034     |                   |
| 1 d           |                         |                   |                   |
|               | 0.62419809739E-01       | 0.36150912942     |                   |
| 1 d           |                         |                   |                   |
|               | 0.15987870156E-01       | 1.0000000000      |                   |
| 1 f           |                         |                   |                   |

```

0.58777000000      0.0000000000
*
cs def2-ecp
*
ncore =      46      lmax =      3
# coefficient r^n      exponent
f      -28.8843090      2      3.1232690
s-f      84.5477300      2      4.0797500
      16.6541730      2      2.4174060
      28.8843090      2      3.1232690
p-f      157.0490590      2      5.5140800
      26.4233070      2      2.1603160
      28.8843090      2      3.1232690
d-f      13.1727530      2      1.8074100
      3.3428330      2      0.8581820
      28.8843090      2      3.1232690
*
*
ba def2-TZVPP
# ba      (7s7p5d1f) / [6s4p3d1f]      {211111/4111/311/1}
*
2 s
6.0000000000      -0.56587174838
4.9822082226      0.97514768535
1 s
2.1451943914      1.0000000000
1 s
0.41486174100      1.0000000000
1 s
0.19214757016      1.0000000000
1 s
0.48465890337E-01      1.0000000000
1 s
0.20138298948E-01      1.0000000000
4 p
5.5000000000      -0.44586312998
4.9017938336      0.67755479813
2.6142685062      -0.46010554954
0.47903394983      0.68749608021
1 p
0.19415138747      1.0000000000
1 p
0.34917622027E-01      1.0000000000
1 p
0.16320065666E-01      1.0000000000
3 d
0.96631500000      -0.90893800000
0.89382800000      0.94724000000
0.27319500000      0.32205700000
1 d
0.10389100000      1.0000000000
1 d
0.35578000000E-01      1.0000000000
1 f
0.65760000000      0.0000000000
*

```

```

ba def2-ecp
*
  ncore =    46          lmax =    3
#      coefficient      r^n      exponent
f
  -33.4731740      2      3.5894650
s-f
  427.8458160      2      9.5269860
  204.4175300      2      4.4875100
  33.4731740      2      3.5894650
p-f
  293.6058640      2      8.3159300
  294.1933160      2      4.2922170
  33.4731740      2      3.5894650
d-f
  112.5504020      2      5.9161080
  181.7826210      2      2.8748420
  33.4731740      2      3.5894650
*
*
la def2-TZVPP
# la      (7s7p5d2f1g) / [6s4p3d2f1g]      {211111/4111/311/11/1}
*
  2 s
  5.0873990000      -0.44174952534
  4.2709780000      0.85812466843
  1 s
  2.1823656045      1.0000000000
  1 s
  0.48966533785      1.0000000000
  1 s
  0.23301675348      1.0000000000
  1 s
  0.55719523051E-01      1.0000000000
  1 s
  0.22854708808E-01      1.0000000000
  4 p
  6.0000000000      -0.11397960924E-01
  3.6808191615      0.14675038550
  2.3265462081      -0.35581819167
  0.64342629633      0.45834955229
  1 p
  0.33584281962      1.0000000000
  1 p
  0.16519051916      1.0000000000
  1 p
  0.35400000000E-01      1.0000000000
  3 d
  1.2675288018      -0.17569274035
  0.89395340284      0.25139922933
  0.33095767339      0.44603267053
  1 d
  0.13461377501      1.0000000000
  1 d
  0.51441629839E-01      1.0000000000
  1 f
  0.38941000000      1.0000000000
  1 f
  0.12043000000      1.0000000000
  1 g

```

```

0.17907000000      1.0000000000
*
la def2-ecp
*
ncore =      46      lmax =      3
# coefficient  r^n      exponent
f      -36.0100160    2      4.0286000
s-f      91.9321770    2      3.3099000
      -3.7887640    2      1.6550000
      36.0100160    2      4.0286000
p-f      63.7594860    2      2.8368000
      -0.6479580    2      1.4184000
      36.0100160    2      4.0286000
d-f      36.1161730    2      2.0213000
      0.2191140    2      1.0107000
      36.0100160    2      4.0286000
*
*
hf def2-TZVPP
# hf      (9s7p5d2f1g) / [6s4p3d2f1g]      {411111/4111/311/11/1}
*
4 s
24.000000000      0.19369448644
16.000000000      -3.5064630782
14.400000000      4.3082581000
10.304504667      -0.91045809742
1 s
3.8426510824      1.0000000000
1 s
0.93296029049      1.0000000000
1 s
0.42615320942      1.0000000000
1 s
0.93366560195E-01  1.0000000000
1 s
0.35532895141E-01  1.0000000000
4 p
17.000000000      -0.30316491880E-01
11.738072097      0.10139279686
4.9203967161      -0.28227924657
1.1251726138      0.52032008501
1 p
0.54220114055      1.0000000000
1 p
0.25659447877      1.0000000000
1 p
0.65000000000E-01  1.0000000000
3 d
3.9820623229      -0.42446023944E-01
1.3077987772      0.18409232564
0.53272310298      0.41484423516
1 d
0.20564954488      1.0000000000
1 d
0.73099858787E-01  1.0000000000
1 f

```

```

0.53104000000      1.0000000000
  1 f
0.16537000000      1.0000000000
  1 g
0.29036000000      1.0000000000
*
hf def2-ecp
*
  ncore =    60      lmax =    3
#      coefficient  r^n      exponent
f
      10.0467225    2        1.7857698
s-f
      1499.2847107  2        14.7699590
      40.2821014   2        7.3849794
      -10.0467225  2        1.7857698
p-f
      397.7330053   2        9.8494895
      19.3164059   2        4.9247445
      -10.0467225  2        1.7857698
d-f
      101.3298053   2        6.0967564
      5.8734382    2        3.0483782
      -10.0467225  2        1.7857698
*
*
ta def2-TZVPP
# ta      (9s7p5d2f1g) / [6s4p3d2f1g]      {4111111/4111/311/11/1}
*
  4 s
  24.473650944      0.20590322488
  18.721372549      -0.74670795514
  11.500000000      3.4071363897
  10.350000000      -2.8175487609
  1 s
  3.8436180089      1.0000000000
  1 s
  1.0202266016      1.0000000000
  1 s
  0.46774781869     1.0000000000
  1 s
  0.10323186670     1.0000000000
  1 s
  0.38674461203E-01 1.0000000000
  4 p
  17.000000000      -0.32577305616E-01
  12.008186536      0.10336287365
  5.0278760583      -0.28526521696
  1.1937124184      0.51790141155
  1 p
  0.57889707053     1.0000000000
  1 p
  0.27225198801     1.0000000000
  1 p
  0.65000000000E-01 1.0000000000
  3 d
  3.9738796278      -0.52799310714E-01
  1.4528884813      0.18558319471
  0.61042908544     0.42959071631
  1 d

```

```

0.24216276510      1.0000000000
  1 d
0.87909318337E-01  1.0000000000
  1 f
0.67066000000     1.0000000000
  1 f
0.21031000000     1.0000000000
  1 g
0.40165000000     1.0000000000
*
ta def2-ecp
*
  ncore =      60          lmax =      3
#      coefficient      r^n      exponent
f
      12.0179609      2          2.0178811
s-f
      1345.8806470      2          14.5464077
      36.7668062      2          7.2732038
      -12.0179609      2          2.0178811
p-f
      378.4253015      2          9.9355653
      22.2930909      2          4.9677824
      -12.0179609      2          2.0178811
d-f
      104.8839557      2          6.3473769
      8.7558481      2          3.1736885
      -12.0179609      2          2.0178811
*
*
w def2-TZVPP
# w      (8s7p6d2f1g) / [6s4p3d2f1g]      {311111/4111/411/11/1}
*
  3 s
  30.000000000      0.32246483410
  27.000000000      -0.46692257214
  13.078045684      0.42699563776
  1 s
  4.8100449717      1.0000000000
  1 s
0.98497804263      1.0000000000
  1 s
0.44910485344      1.0000000000
  1 s
0.11448352920      1.0000000000
  1 s
0.41720421956E-01  1.0000000000
  4 p
  17.000000000      -0.37817768433E-01
  12.431973432      0.10905673845
  5.1586217658      -0.29399955020
  1.2801454812      0.51560726697
  1 p
0.62856790898      1.0000000000
  1 p
0.29380423553      1.0000000000
  1 p
0.65000000000E-01  1.0000000000
  4 d
  7.4064737315      0.86993963018E-01

```

```

5.9026268603      -0.17667540011
1.2984756750      0.55145697030
0.57153508541    0.95313596535
 1 d
0.23845526606    1.00000000000
 1 d
0.91144267331E-01 1.00000000000
 1 f
0.80824000000    1.00000000000
 1 f
0.25524000000    1.00000000000
 1 g
0.51293000000    1.00000000000
*
w def2-ecp
*
  ncore =    60          lmax =    3
#   coefficient   r^n      exponent
f
      14.1525795     2         2.2588885
s-f
      1192.3958823   2         14.3228564
      32.5229332    2         7.1614281
      -14.1525795   2         2.2588885
p-f
      359.0319671    2         10.0216411
      24.0303802    2         5.0108204
      -14.1525795   2         2.2588885
d-f
      108.3013490    2         6.5979974
      10.9825283    2         3.2989987
      -14.1525795   2         2.2588885
*
*
re def2-TZVPP
# re      (8s7p6d2f1g) / [6s4p3d2f1g]      {311111/4111/411/11/1}
*
  3 s
30.000000000      0.31780717811
27.000000000     -0.46492321332
13.078045684      0.45723641305
 1 s
5.0352712861     1.00000000000
 1 s
1.0482706438     1.00000000000
 1 s
0.47708773413    1.00000000000
 1 s
0.12225857255    1.00000000000
 1 s
0.44007400609E-01 1.00000000000
 4 p
18.000000000     -0.26890962397E-01
12.318606250     0.99711498502E-01
5.3719234505     -0.29289398145
1.3506646748     0.51466301434
 1 p
0.66212816808    1.00000000000
 1 p
0.31071385193    1.00000000000

```



```

1 p
0.700000000000E-01  1.0000000000
4 d
7.7352877672      0.83901798556E-01
6.0949443610     -0.17722258734
1.3871105497      0.55238259692
0.62324027854     0.91980111239
1 d
0.26517328547     1.0000000000
1 d
0.10321096849     1.0000000000
1 f
0.94386000000     1.0000000000
1 f
0.30018000000     1.0000000000
1 g
0.62422000000     1.0000000000
*
re def2-ecp
*
ncore = 60          lmax = 3
# coefficient      r^n      exponent
f
      16.4498523    2          2.5086506
s-f
      1038.9515723  2          14.0993051
      29.5617383   2          7.0496525
      -16.4498523  2          2.5086506
p-f
      339.5435096   2          10.1077169
      24.9136965   2          5.0538583
      -16.4498523  2          2.5086506
d-f
      111.6996527   2          6.8486179
      12.6243293   2          3.4243090
      -16.4498523  2          2.5086506
*
*
os def2-TZVPP
# os      (8s7p6d2f1g) / [6s4p3d2f1g]      {311111/4111/411/11/1}
*
3 s
30.000000000      0.32213004804
27.000000000      -0.47922918137
13.524730005      0.47465946837
1 s
5.2402883472      1.0000000000
1 s
1.1306661245      1.0000000000
1 s
0.51689966917     1.0000000000
1 s
0.13222953545     1.0000000000
1 s
0.47220318801E-01 1.0000000000
4 p
15.500000000      0.16016463376
14.000000000      -0.23201520402
5.5458290420      0.29772587274
1.4139502215      -0.54253238176

```

```

1 p
0.68136686765      1.0000000000
1 p
0.30911452647      1.0000000000
1 p
0.520000000000E-01  1.0000000000
4 d
8.2945059487      0.69648222110E-01
6.3060397430      -0.16444229630
1.4890109110      0.55154541033
0.67315390607      0.88461370291
1 d
0.28590805222      1.0000000000
1 d
0.11058012051      1.0000000000
1 f
1.0672900000      1.0000000000
1 f
0.34222000000      1.0000000000
1 g
0.75489000000      1.0000000000
*
os def2-ecp
*
ncore =      60      lmax =      3
# coefficient r^n      exponent
f
      18.9094570      2      2.7670751
s-f
      885.4057191      2      13.8757539
      25.9670401      2      6.9378769
      -18.9094570      2      2.7670751
p-f
      320.0839019      2      10.1937926
      26.1487649      2      5.0968962
      -18.9094570      2      2.7670751
d-f
      115.0448431      2      7.0992385
      13.6225746      2      3.5496192
      -18.9094570      2      2.7670751
*
*
ir def2-TZVPP
# ir      (8s7p6d2f1g) / [6s4p3d2f1g]      {311111/4111/411/11/1}
*
3 s
30.000000000      0.30797903228
27.000000000      -0.46726361781
13.961973911      0.47161003146
1 s
5.3956977802      1.0000000000
1 s
1.2149128721      1.0000000000
1 s
0.55885743756      1.0000000000
1 s
0.14097974313      1.0000000000
1 s
0.50021924989E-01  1.0000000000
4 p

```

```

15.902664143      -0.16290720099
14.415830698      0.23483212987
5.7597608991     -0.30305337176
1.5008913108     0.55512982069
 1 p
0.72348035957     1.00000000000
 1 p
0.32785980328     1.00000000000
 1 p
0.560000000000E-01 1.00000000000
 4 d
 8.6321692504     0.75000099949E-01
 6.5898192302     -0.17326965173
 1.5808379663     0.55065196913
0.71827834905     0.85273641436
 1 d
0.30571851998     1.00000000000
 1 d
0.11827071879     1.00000000000
 1 f
 1.1885700000     1.00000000000
 1 f
0.38426000000     1.00000000000
 1 g
0.88556000000     1.00000000000
*
ir def2-ecp
*
  ncore =    60      lmax =    3
#      coefficient  r^n      exponent
f
      21.5310311    2        3.0340719
s-f
      732.2691998    2        13.6522026
      26.4847209    2         6.8261013
      -21.5310311    2         3.0340719
p-f
      299.4894736    2        10.2798684
      26.4662335    2         5.1399341
      -21.5310311    2         3.0340719
d-f
      124.4575945    2         7.3498590
      14.0359952    2         3.6749295
      -21.5310311    2         3.0340719
*
*
pt def2-TZVPP
# pt      (8s7p6d2f1g) / [6s4p3d2f1g]      {311111/4111/411/11/1}
*
 3 s
30.000000000     0.27148263900
27.000000000     -0.42226758774
14.408318564     0.44361581995
 1 s
 5.5335788010     1.00000000000
 1 s
 1.2986438223     1.00000000000
 1 s
0.58759393108     1.00000000000
 1 s

```

```

0.13845587261      1.0000000000
 1 s
0.49204459888E-01  1.0000000000
 4 p
15.500000000      -0.15672718629
14.000000000      0.23853412989
 6.1161212339     -0.31041379733
 1.5715586385     0.56473525089
 1 p
0.75132510781     1.0000000000
 1 p
0.33306466812     1.0000000000
 1 p
0.57000000000E-01  1.0000000000
 4 d
 8.3207937611     0.62945798646E-01
 7.4207226520     -0.90271847072E-01
 1.6570410639     0.16812526416
0.73943569960     0.25045416970
 1 d
0.30510856008     1.0000000000
 1 d
0.11350405268     1.0000000000
 1 f
 1.3077100000     1.0000000000
 1 f
0.42630000000     1.0000000000
 1 g
 1.0162300000     1.0000000000
*
pt def2-ecp
*
  ncore =      60          lmax =      3
#      coefficient  r^n      exponent
f
      24.3143757      2          3.3095686
s-f
      579.2238609      2          13.4286513
      29.6694906      2          6.7143256
      -24.3143757      2          3.3095686
p-f
      280.8607742      2          10.3659442
      26.7453820      2          5.1829721
      -24.3143757      2          3.3095686
d-f
      120.3964443      2          7.6004795
      15.8109206      2          3.8002397
      -24.3143757      2          3.3095686
*
*
au def2-TZVPP
# au      (8s7p6d2f1g) / [6s4p3d2f1g]      {311111/4111/411/11/1}
*
  3 s
30.000000000      0.20749231108
27.000000000      -0.33267893394
14.746824331      0.38302817958
 1 s
5.6017248938     1.0000000000
 1 s

```

```

1.3874162443      1.0000000000
 1 s
0.62923031957    1.0000000000
 1 s
0.14027517613    1.0000000000
 1 s
0.49379413761E-01  1.0000000000
 4 p
15.500000000     0.15001711880
14.000000000     -0.23609813183
 6.4227368205    0.31458896948
 1.6595601681    -0.57279670446
 1 p
0.79402913993    1.0000000000
 1 p
0.35125155397    1.0000000000
 1 p
0.45000000000E-01  1.0000000000
 4 d
 9.5524098656    0.40145559502E-01
 7.2698886937    -0.93690906606E-01
 1.7746496789    0.31746282317
0.79960541055    0.46795192483
 1 d
0.33252279372    1.0000000000
 1 d
0.12445133105    1.0000000000
 1 f
 1.4246900000    1.0000000000
 1 f
0.46834000000    1.0000000000
 1 g
 1.1469000000    1.0000000000
*
au def2-ecp
*
  ncore =      60      lmax =      3
#      coefficient  r^n      exponent
f
      30.4900889    2      4.7898200
      5.1710738    2      2.3949100
s-f
      426.8466792   2      13.2051000
      37.0070829   2      6.6025500
      -30.4900889   2      4.7898200
      -5.1710738    2      2.3949100
p-f
      261.1995804   2      10.4520200
      26.9624960    2      5.2260100
      -30.4900889   2      4.7898200
      -5.1710738    2      2.3949100
d-f
      124.7906656   2      7.8511000
      16.3007257    2      3.9255500
      -30.4900889   2      4.7898200
      -5.1710738    2      2.3949100
*
*
hg def2-TZVPP
# hg      (8s8p6d2f1g) / [6s5p3d2f1g]      {311111/41111/411/11/1}

```

```

*
  3 s
48.013786990      0.58008164912E-02
21.239875095     -0.17328165235
15.876100879      0.36416685034
  1 s
5.5180531820      1.00000000000
  1 s
1.5099145479      1.00000000000
  1 s
0.70683482159     1.00000000000
  1 s
0.16266265576     1.00000000000
  1 s
0.56960589112E-01 1.00000000000
  4 p
17.500000000      -0.86457187331E-01
15.252594855      0.15327318234
6.4404715169     -0.30274955249
1.8180159920      0.54361285026
  1 p
0.90067981801     1.00000000000
  1 p
0.41304540122     1.00000000000
  1 p
0.11845702655     1.00000000000
  1 p
0.36087619349E-01 1.00000000000
  4 d
10.028197701      0.39922353165E-01
7.5920661493     -0.94774230522E-01
1.9144256118      0.31164157463
0.88641552102     0.45567078406
  1 d
0.38154235320     1.00000000000
  1 d
0.14880740086     1.00000000000
  1 f
1.5521700000      1.00000000000
  1 f
0.52431000000     1.00000000000
  1 g
1.2895000000      1.00000000000

```

```

*
hg def2-ecp

```

```

*
  ncore =    60      lmax =    3
#      coefficient  r^n      exponent
f
      30.3649964    2        3.8857911
s-f
      275.7372117   2        12.9815487
      49.0892125    2        6.4907744
      -30.3649964   2        3.8857911
p-f
      241.5400740    2        10.5380958
      27.3965908    2        5.2690479
      -30.3649964   2        3.8857911
d-f
      127.8670076    2        8.1017205

```

|             |   |           |
|-------------|---|-----------|
| 16.6083115  | 2 | 4.0508603 |
| -30.3649964 | 2 | 3.8857911 |

\*

\*

t1 def2-TZVPP

# t1 (10s9p8d2f) / [6s5p3d2f] {421111/33111/611/11}

\*

|                   |   |                    |  |
|-------------------|---|--------------------|--|
| 4                 | s |                    |  |
| 729.65038145      |   | 0.13672829828E-03  |  |
| 46.665548707      |   | 0.60443439951E-02  |  |
| 20.970448726      |   | -0.20022066697     |  |
| 14.149588677      |   | 0.40801678488      |  |
| 2                 | s |                    |  |
| 20.730134285      |   | -0.71861135918E-01 |  |
| 6.1527631309      |   | 0.98057508445      |  |
| 1                 | s |                    |  |
| 1.5757324480      |   | 1.0000000000       |  |
| 1                 | s |                    |  |
| 0.74980169458     |   | 1.0000000000       |  |
| 1                 | s |                    |  |
| 0.19536816194     |   | 1.0000000000       |  |
| 1                 | s |                    |  |
| 0.70878767298E-01 |   | 1.0000000000       |  |
| 3                 | p |                    |  |
| 15.383852616      |   | 0.61717949180      |  |
| 14.814929544      |   | -0.72859235151     |  |
| 6.7261253658      |   | 0.40438195364      |  |
| 3                 | p |                    |  |
| 1.9626182149      |   | 0.43157661160      |  |
| 1.0331857851      |   | 0.39230403853      |  |
| 0.53837445996     |   | 0.14007406820      |  |
| 1                 | p |                    |  |
| 0.24446611676     |   | 1.0000000000       |  |
| 1                 | p |                    |  |
| 0.90785377260E-01 |   | 1.0000000000       |  |
| 1                 | p |                    |  |
| 0.33401321498E-01 |   | 1.0000000000       |  |
| 6                 | d |                    |  |
| 57.606819928      |   | 0.16054811114E-03  |  |
| 9.7368866667      |   | 0.24456562496E-01  |  |
| 6.9256201679      |   | -0.69914775031E-01 |  |
| 2.1396230731      |   | 0.19496269490      |  |
| 1.0836187110      |   | 0.29731629705      |  |
| 0.52356298209     |   | 0.23728708102      |  |
| 1                 | d |                    |  |
| 0.23842309375     |   | 1.0000000000       |  |
| 1                 | d |                    |  |
| 0.95000000000E-01 |   | 1.0000000000       |  |
| 1                 | f |                    |  |
| 0.28435000000     |   | 1.0000000000       |  |
| 1                 | f |                    |  |
| 0.95000000000     |   | 1.0000000000       |  |

\*

t1 def2-ecp

\*

|         |             |        |           |
|---------|-------------|--------|-----------|
| ncore = | 60          | lmax = | 3         |
| #       | coefficient | r^n    | exponent  |
| f       | 15.8254880  | 2      | 5.6263990 |
|         | 21.1040210  | 2      | 5.5489520 |

|     |             |   |            |
|-----|-------------|---|------------|
|     | 2.9151270   | 2 | 2.8749460  |
|     | 3.8969030   | 2 | 2.8214510  |
| s-f |             |   |            |
|     | 281.2846630 | 2 | 12.1678050 |
|     | 62.4342510  | 2 | 8.2949090  |
|     | -15.8254880 | 2 | 5.6263990  |
|     | -21.1040210 | 2 | 5.5489520  |
|     | -2.9151270  | 2 | 2.8749460  |
|     | -3.8969030  | 2 | 2.8214510  |
| p-f |             |   |            |
|     | 4.6334080   | 2 | 7.1514920  |
|     | 9.3417560   | 2 | 5.1728650  |
|     | 72.2992530  | 2 | 9.8910720  |
|     | 144.5580370 | 2 | 9.0033910  |
|     | -15.8254880 | 2 | 5.6263990  |
|     | -21.1040210 | 2 | 5.5489520  |
|     | -2.9151270  | 2 | 2.8749460  |
|     | -3.8969030  | 2 | 2.8214510  |
| d-f |             |   |            |
|     | 35.9430390  | 2 | 7.1302180  |
|     | 53.9095930  | 2 | 6.9269060  |
|     | 10.3819390  | 2 | 5.4175700  |
|     | 15.5838220  | 2 | 5.1386810  |
|     | -15.8254880 | 2 | 5.6263990  |
|     | -21.1040210 | 2 | 5.5489520  |
|     | -2.9151270  | 2 | 2.8749460  |
|     | -3.8969030  | 2 | 2.8214510  |

\*

\*

pb def2-TZVPP

# pb (10s9p8d2f) / [6s5p3d2f] {421111/331111/611/11}

\*

|                   |   |                    |
|-------------------|---|--------------------|
| 4                 | s |                    |
| 591.61124370      |   | 0.22126521076E-03  |
| 46.757232559      |   | 0.56961959130E-02  |
| 20.746462696      |   | -0.21374063831     |
| 14.610796419      |   | 0.40502620616      |
| 2                 | s |                    |
| 20.222637612      |   | -0.83541883299E-01 |
| 6.4767324865      |   | 0.97910892388      |
| 1                 | s |                    |
| 1.6600600927      |   | 1.0000000000       |
| 1                 | s |                    |
| 0.80431655001     |   | 1.0000000000       |
| 1                 | s |                    |
| 0.22627039020     |   | 1.0000000000       |
| 1                 | s |                    |
| 0.84014530665E-01 |   | 1.0000000000       |
| 3                 | p |                    |
| 15.189102118      |   | 0.61952303583      |
| 14.693144415      |   | -0.72498497086     |
| 6.8705890048      |   | 0.37680007984      |
| 3                 | p |                    |
| 2.2021426123      |   | 0.40196284806      |
| 1.2209125119      |   | 0.46058131862      |
| 0.63367559815     |   | 0.19367655397      |
| 1                 | p |                    |
| 0.28202837058     |   | 1.0000000000       |
| 1                 | p |                    |
| 0.11333375666     |   | 1.0000000000       |



```

1 p
0.43948707430E-01 1.0000000000
6 d
61.315369628 0.33870800787E-03
12.372195840 0.13788683942E-01
6.9254944983 -0.75979608103E-01
2.3319539939 0.28113784298
1.2108730003 0.44474512269
0.60090478506 0.35326874351
1 d
0.28135869813 1.0000000000
1 d
0.11500000000 1.0000000000
1 f
0.28962000000 1.0000000000
1 f
1.00000000000 1.0000000000
*
pb def2-ecp
*
ncore = 60 lmax = 3
# coefficient r^n exponent
f
12.2098920 2 3.8875120
16.1902910 2 3.8119630
s-f
281.2854990 2 12.2963030
62.5202170 2 8.6326340
-12.2098920 2 3.8875120
-16.1902910 2 3.8119630
p-f
72.2768970 2 10.2417900
144.5910830 2 8.9241760
4.7586930 2 6.5813420
9.9406210 2 6.2554030
-12.2098920 2 3.8875120
-16.1902910 2 3.8119630
d-f
35.8485070 2 7.7543360
53.7243420 2 7.7202810
10.1152560 2 4.9702640
14.8337310 2 4.5637890
-12.2098920 2 3.8875120
-16.1902910 2 3.8119630
*
*
bi def2-TZVPP
# bi (10s9p8d2f) / [6s5p3d2f] {421111/33111/611/11}
*
4 s
716.41435310 0.31254307133E-03
83.806059047 0.17624768946E-02
21.116962853 -0.21910983437
15.491448187 0.40411224931
2 s
23.239855029 -0.68255758685E-01
6.6474255000 0.97888046471
1 s
1.7617744005 1.0000000000
1 s

```

|                   |                    |
|-------------------|--------------------|
| 0.87252866000     | 1.0000000000       |
| 1 s               |                    |
| 0.25618895997     | 1.0000000000       |
| 1 s               |                    |
| 0.97073913006E-01 | 1.0000000000       |
| 3 p               |                    |
| 15.249644669      | 0.74560356000      |
| 14.846176053      | -0.85578637338     |
| 7.0636826784      | 0.40149159592      |
| 3 p               |                    |
| 2.5881255616      | 0.35542729633      |
| 1.5020208499      | 0.63976991890      |
| 0.76732724388     | 0.32332773839      |
| 1 p               |                    |
| 0.32797648982     | 1.0000000000       |
| 1 p               |                    |
| 0.13820335991     | 1.0000000000       |
| 1 p               |                    |
| 0.55137330969E-01 | 1.0000000000       |
| 6 d               |                    |
| 66.404481948      | 0.38102878348E-03  |
| 13.858426961      | 0.10746152442E-01  |
| 7.0654519000      | -0.71947646845E-01 |
| 2.5252144035      | 0.26195974989      |
| 1.3419585000      | 0.42594750000      |
| 0.68340941000     | 0.33680325627      |
| 1 d               |                    |
| 0.32934755420     | 1.0000000000       |
| 1 d               |                    |
| 0.14000000000     | 1.0000000000       |
| 1 f               |                    |
| 0.31271000000     | 1.0000000000       |
| 1 f               |                    |
| 1.05000000000     | 1.0000000000       |

\*

bi def2-ecp

\*

| #   | ncore = 60 | lmax = 3 | coefficient | r^n | exponent   |
|-----|------------|----------|-------------|-----|------------|
| f   |            |          | 13.7133830  | 2   | 4.2145460  |
|     |            |          | 18.1943080  | 2   | 4.1334000  |
| s-f |            |          | 283.2642270 | 2   | 13.0430900 |
|     |            |          | 62.4719590  | 2   | 8.2216820  |
|     |            |          | -13.7133830 | 2   | 4.2145460  |
|     |            |          | -18.1943080 | 2   | 4.1334000  |
| p-f |            |          | 72.0014990  | 2   | 10.4677770 |
|     |            |          | 144.0022770 | 2   | 9.1189010  |
|     |            |          | 5.0079450   | 2   | 6.7547910  |
|     |            |          | 9.9915500   | 2   | 6.2525920  |
|     |            |          | -13.7133830 | 2   | 4.2145460  |
|     |            |          | -18.1943080 | 2   | 4.1334000  |
| d-f |            |          | 36.3962590  | 2   | 8.0814740  |
|     |            |          | 54.5976640  | 2   | 7.8905950  |
|     |            |          | 9.9842940   | 2   | 4.9555560  |
|     |            |          | 14.9814850  | 2   | 4.7045590  |
|     |            |          | -13.7133830 | 2   | 4.2145460  |

```

-18.1943080      2      4.1334000
*
*
po def2-TZVPP
# po      (11s10p8d2f) / [6s5p3d2f]      {521111/34111/611/11}
*
  5 s
6744.8211765      0.76891556363E-04
744.41892532      0.71284827354E-03
131.04029309      0.22057583958E-02
19.662021030      -0.64364713744
16.623025609      0.91997150546
  2 s
23.094002965      -0.70404410177E-01
6.9707398381      0.97886540086
  1 s
1.8497377593      1.0000000000
  1 s
0.93082999263      1.0000000000
  1 s
0.28673026462      1.0000000000
  1 s
0.10979212169      1.0000000000
  3 p
253.99024497      0.83876362116E-04
9.8712718748      0.24572710458
7.4489893496      -0.44297763661
  4 p
8.9027395407      -0.13798250445
5.7414667465      0.26304005326
1.9896329823      0.66225846161
0.94703210822      0.39547051892
  1 p
0.37071136280      1.0000000000
  1 p
0.15554706086      1.0000000000
  1 p
0.61173720818E-01  1.0000000000
  6 d
67.943077046      0.48919125336E-03
14.914219894      0.10157120776E-01
7.2973948305      -0.69943263066E-01
2.6826784400      0.26244730680
1.4374143009      0.42702361494
0.73903797417      0.32502435477
  1 d
0.35838153281      1.0000000000
  1 d
0.15000000000      1.0000000000
  1 f
0.33275000000      1.0000000000
  1 f
1.40000000000      1.0000000000
*
po def2-ecp
*
ncore =      60      lmax =      3
#      coefficient      r^n      exponent
f
      17.4282950      2      5.0132700

```

|               |                           |                   |                         |
|---------------|---------------------------|-------------------|-------------------------|
|               | 23.3803530                | 2                 | 4.9846400               |
|               | 0.1633920                 | 2                 | 1.3267600               |
|               | 0.3245660                 | 2                 | 1.5287580               |
| s-f           |                           |                   |                         |
|               | 283.2447060               | 2                 | 13.2772270              |
|               | 62.3964610                | 2                 | 8.3995180               |
|               | -17.4282950               | 2                 | 5.0132700               |
|               | -23.3803530               | 2                 | 4.9846400               |
|               | -0.1633920                | 2                 | 1.3267600               |
|               | -0.3245660                | 2                 | 1.5287580               |
| p-f           |                           |                   |                         |
|               | 71.9917160                | 2                 | 10.6656820              |
|               | 143.9718710               | 2                 | 9.2837530               |
|               | 4.9496150                 | 2                 | 6.8727490               |
|               | 9.7404990                 | 2                 | 6.3261500               |
|               | -17.4282950               | 2                 | 5.0132700               |
|               | -23.3803530               | 2                 | 4.9846400               |
|               | -0.1633920                | 2                 | 1.3267600               |
|               | -0.3245660                | 2                 | 1.5287580               |
| d-f           |                           |                   |                         |
|               | 36.3783830                | 2                 | 8.2148660               |
|               | 54.5627150                | 2                 | 8.0086960               |
|               | 9.8894990                 | 2                 | 5.0552270               |
|               | 14.6938770                | 2                 | 4.7825530               |
|               | -17.4282950               | 2                 | 5.0132700               |
|               | -23.3803530               | 2                 | 4.9846400               |
|               | -0.1633920                | 2                 | 1.3267600               |
|               | -0.3245660                | 2                 | 1.5287580               |
| *             |                           |                   |                         |
| *             |                           |                   |                         |
| at def2-TZVPP |                           |                   |                         |
| # at          | (11s10p8d2f) / [6s5p3d2f] |                   | {5211111/341111/611/11} |
| *             |                           |                   |                         |
| 5 s           |                           |                   |                         |
|               | 3635.9809356              | 0.12571463494E-03 |                         |
|               | 537.64129823              | 0.75950883820E-03 |                         |
|               | 91.600030756              | 0.25790982348E-02 |                         |
|               | 20.200005804              | -0.54772187699    |                         |
|               | 16.893873824              | 0.78417507786     |                         |
| 2 s           |                           |                   |                         |
|               | 18.177216938              | -0.13023627002    |                         |
|               | 7.2317852082              | 0.96473566747     |                         |
| 1 s           |                           |                   |                         |
|               | 1.9496199739              | 1.0000000000      |                         |
| 1 s           |                           |                   |                         |
|               | 0.99226695236             | 1.0000000000      |                         |
| 1 s           |                           |                   |                         |
|               | 0.31957178881             | 1.0000000000      |                         |
| 1 s           |                           |                   |                         |
|               | 0.12342539809             | 1.0000000000      |                         |
| 3 p           |                           |                   |                         |
|               | 216.81518928              | 0.16975297090E-03 |                         |
|               | 10.592298115              | 0.22683755793     |                         |
|               | 7.4596585430              | -0.47336848377    |                         |
| 4 p           |                           |                   |                         |
|               | 8.9484156471              | -0.15012953475    |                         |
|               | 5.9694592464              | 0.27048141788     |                         |
|               | 2.1099088209              | 0.63671217722     |                         |
|               | 1.0236370373              | 0.38057472615     |                         |
| 1 p           |                           |                   |                         |

```

0.42186356565      1.0000000000
 1 p
0.17757132268      1.0000000000
 1 p
0.69670886939E-01  1.0000000000
 6 d
 70.619633393      0.59974022914E-03
 16.212096478      0.93445952839E-02
 7.3607401479      -0.70748413897E-01
 2.9309052592      0.24037366077
 1.6085414823      0.41841372624
0.84194162715      0.32832651044
 1 d
0.41335677957      1.0000000000
 1 d
0.17400000000      1.0000000000
 1 f
0.37408000000      1.0000000000
 1 f
 1.80000000000      1.0000000000
*
at def2-ecp
*
ncore =    60          lmax =    3
#      coefficient    r^n      exponent
f
      19.8701980      2          5.8121630
      26.4164520      2          5.7537150
      0.9949700      2          2.5134720
      1.4907010      2          2.5362610
s-f
      49.9571580      2          30.2008320
      283.2103710     2          13.6123060
      62.2810520      2          8.5293400
      -19.8701980     2          5.8121630
      -26.4164520     2          5.7537150
      -0.9949700      2          2.5134720
      -1.4907010      2          2.5362610
p-f
      71.9823710      2          10.8540650
      143.9035320     2          9.4682290
      4.8717590       2          7.0311140
      8.9830590       2          6.1438580
      -19.8701980     2          5.8121630
      -26.4164520     2          5.7537150
      -0.9949700      2          2.5134720
      -1.4907010      2          2.5362610
d-f
      36.3632370      2          8.3135150
      54.5489700      2          7.9989650
      9.7762850       2          5.1799660
      14.2647550      2          4.9422260
      -19.8701980     2          5.8121630
      -26.4164520     2          5.7537150
      -0.9949700      2          2.5134720
      -1.4907010      2          2.5362610
*
*
rn def2-TZVPP
# rn      (11s10p8d2f) / [6s5p3d2f]      {521111/34111/611/11}

```

```

*
  5 s
5187.7442468      0.16097034848E-03
768.14491207     0.10508214789E-02
159.35182065     0.27375438093E-02
21.863432724    -0.55045904905
18.388689978     0.78321373922
  2 s
24.816226448    -0.82636797204E-01
7.2923301677     1.0926256000
  1 s
2.0850437166     1.0000000000
  1 s
1.0915245945     1.0000000000
  1 s
0.34915708428    1.0000000000
  1 s
0.13648422952    1.0000000000
  3 p
194.68918723     0.26265814046E-03
11.210013525     0.19952302621
7.5298316489    -0.45994479561
  4 p
9.0845000304    -0.23093917426
6.2631489717     0.39747614192
2.2545193734     0.83026693838
1.1180666918     0.51467013112
  1 p
0.47444492594    1.0000000000
  1 p
0.20172354616    1.0000000000
  1 p
0.79503144392E-01 1.0000000000
  6 d
75.302723665     0.73590238429E-03
17.965913830     0.89490827389E-02
7.3741298033    -0.76641663693E-01
3.2296258578     0.22975404602
1.7937840508     0.43991495311
0.94633319732    0.35259395198
  1 d
0.46860482223    1.0000000000
  1 d
0.20000000000    1.0000000000
  1 f
0.41806000000    1.0000000000
  1 f
2.10000000000    1.0000000000

```

```

*
rn def2-ecp
*
ncore =      60          lmax =      3
#      coefficient      r^n      exponent
f
      21.7972900        2          6.3485710
      28.9468050        2          6.2959490
      1.4473650         2          2.8821180
      2.1779640         2          2.9080480
s-f
      49.9655510        2          30.1512420

```

|     |             |   |            |
|-----|-------------|---|------------|
|     | 283.0700000 | 2 | 14.5212410 |
|     | 62.0028700  | 2 | 8.0520380  |
|     | -21.7972900 | 2 | 6.3485710  |
|     | -28.9468050 | 2 | 6.2959490  |
|     | -1.4473650  | 2 | 2.8821180  |
|     | -2.1779640  | 2 | 2.9080480  |
| p-f |             |   |            |
|     | 71.9691190  | 2 | 11.0099420 |
|     | 143.8605590 | 2 | 9.6176250  |
|     | 4.7147610   | 2 | 7.3360080  |
|     | 9.0130650   | 2 | 6.4062530  |
|     | -21.7972900 | 2 | 6.3485710  |
|     | -28.9468050 | 2 | 6.2959490  |
|     | -1.4473650  | 2 | 2.8821180  |
|     | -2.1779640  | 2 | 2.9080480  |
| d-f |             |   |            |
|     | 36.3683650  | 2 | 8.3692200  |
|     | 54.5517610  | 2 | 8.1169750  |
|     | 9.6344870   | 2 | 5.3536560  |
|     | 14.3879020  | 2 | 5.0972120  |
|     | -21.7972900 | 2 | 6.3485710  |
|     | -28.9468050 | 2 | 6.2959490  |
|     | -1.4473650  | 2 | 2.8821180  |
|     | -2.1779640  | 2 | 2.9080480  |

\*

=====  
def2-QZVP  
=====

\*

h def2-QZVP

# h (7s3p2d1f) / [4s3p2d1f] {4111/111/11/1}

\*

|                   |   |                   |  |
|-------------------|---|-------------------|--|
| 4                 | s |                   |  |
| 190.69169000      |   | 0.70815167000E-03 |  |
| 28.605532000      |   | 0.54678827000E-02 |  |
| 6.5095943000      |   | 0.27966605000E-01 |  |
| 1.8412455000      |   | 0.10764538000     |  |
| 1                 | s |                   |  |
| 0.59853725000     |   | 1.00000000000     |  |
| 1                 | s |                   |  |
| 0.21397624000     |   | 1.00000000000     |  |
| 1                 | s |                   |  |
| 0.80316286000E-01 |   | 1.00000000000     |  |
| 1                 | p |                   |  |
| 2.29200000000     |   | 1.00000000000     |  |
| 1                 | p |                   |  |
| 0.83800000000     |   | 1.00000000000     |  |
| 1                 | p |                   |  |
| 0.29200000000     |   | 1.00000000000     |  |
| 1                 | d |                   |  |
| 2.06200000000     |   | 1.00000000000     |  |
| 1                 | d |                   |  |
| 0.66200000000     |   | 1.00000000000     |  |
| 1                 | f |                   |  |
| 1.39700000000     |   | 1.00000000000     |  |

\*

\*

he def2-QZVP

# he (8s3p2d1f) / [4s3p2d1f] {5111/111/11/1}

\*

```

5 s
1144.6470809      0.35861578618E-03
171.64596667     0.27725434466E-02
39.066056254     0.14241892216E-01
11.051401989     0.55457352277E-01
3.5725574473     0.16170511810
1 s
1.2429415962     0.33177883833
1 s
0.44807668730   0.42014033068
1 s
0.16411579128   0.18652273014
1 p
5.9940000000     1.0000000000
1 p
1.7450000000     1.0000000000
1 p
0.56000000000   1.0000000000
1 d
4.2990000000     1.0000000000
1 d
1.2230000000     1.0000000000
1 f
2.6800000000     1.0000000000
*
*
li def2-QZVP
# li      (15s6p2d1f) / [6s4p2d1f]      {921111/3111/11/1}
*
9 s
14853.977085     0.42711388815E-04
2225.2236477     0.33235310800E-03
504.88739008     0.17518436649E-02
142.45847548     0.73477995850E-02
46.315599580     0.25899837683E-01
16.655335474     0.76670682431E-01
6.4331186199     0.18276075765
2.6027043858     0.32655434038
1.0897245405     0.37000429828
2 s
4.4236595971     0.11120987921
1.2356394990     0.79987335862
1 s
0.46067470602    1.0000000000
1 s
0.96617166955E-01 1.0000000000
1 s
0.45915452296E-01 1.0000000000
1 s
0.21140048730E-01 1.0000000000
3 p
3.2605109206     0.86504749023E-02
0.65003043115    0.47614123736E-01
0.16941671073    0.21001138000
1 p
0.55732343767E-01 1.0000000000
1 p
0.20489959241E-01 1.0000000000
1 p
3.3270000000     1.0000000000

```



```

1 d
0.230000000000      1.000000000000
1 d
0.757000000000E-01  1.000000000000
1 f
0.135000000000      1.000000000000
*
*
be def2-QZVP
# be      (15s7p2d1f) / [7s4p2d1f]      {8211111/4111/11/1}
*
8 s
29646.704407        0.37943320869E-04
4428.7614354        0.29605352634E-03
1005.4701332        0.15572477356E-02
284.15339578        0.65323195769E-02
92.504356461        0.23116861005E-01
33.311016058        0.69458515249E-01
12.911553314        0.17014371331
5.2665497361        0.31682711374
2 s
22.995386380        0.81791122747E-01
6.6236354176        0.80000038023
1 s
2.2289595003        1.000000000000
1 s
0.95302433451        1.000000000000
1 s
0.24651602436        1.000000000000
1 s
0.10153895315        1.000000000000
1 s
0.41551374604E-01   1.000000000000
4 p
14.099789445        0.38508871145E-02
3.1803188482        0.24152380771E-01
0.90489220496        0.97926925156E-01
0.30411585508        0.29470380030
1 p
0.11302606657        1.000000000000
1 p
0.42831733691E-01   1.000000000000
1 p
6.40000000000        1.000000000000
1 d
0.360000000000      1.000000000000
1 d
0.900000000000E-01  1.000000000000
1 f
0.290000000000      1.000000000000
*
*
b def2-QZVP
# b      (15s8p3d2f1g) / [7s4p3d2f1g]      {8211111/5111/111/11/1}
*
8 s
46447.667056        0.38388681014E-04
6957.6889042        0.29836770197E-03
1583.4428403        0.15645478806E-02
448.46601009        0.65476770742E-02

```

|                                  |                         |
|----------------------------------|-------------------------|
| 146.28639262                     | 0.23139008388E-01       |
| 52.784386084                     | 0.69615799357E-01       |
| 20.519396170                     | 0.17119636876           |
| 8.4185659258                     | 0.31913191837           |
| 2 s                              |                         |
| 36.510018312                     | 0.78990617244E-01       |
| 10.541854005                     | 0.78926384265           |
| 1 s                              |                         |
| 3.6004091387                     | 1.0000000000            |
| 1 s                              |                         |
| 1.5617023749                     | 1.0000000000            |
| 1 s                              |                         |
| 0.44997370775                    | 1.0000000000            |
| 1 s                              |                         |
| 0.18075230237                    | 1.0000000000            |
| 1 s                              |                         |
| 0.71596696319E-01                | 1.0000000000            |
| 5 p                              |                         |
| 72.240462760                     | 0.86539170411E-03       |
| 16.807707208                     | 0.68762067365E-02       |
| 5.2259410747                     | 0.30976687148E-01       |
| 1.8508350671                     | 0.10432357913           |
| 0.72206782663                    | 0.26164137577           |
| 1 p                              |                         |
| 0.29491018056                    | 1.0000000000            |
| 1 p                              |                         |
| 0.12201141839                    | 1.0000000000            |
| 1 p                              |                         |
| 0.49865393625E-01                | 1.0000000000            |
| 1 d                              |                         |
| 1.1100000000                     | 1.0000000000            |
| 1 d                              |                         |
| 0.4020000000                     | 1.0000000000            |
| 1 d                              |                         |
| 0.1450000000                     | 1.0000000000            |
| 1 f                              |                         |
| 0.8820000000                     | 1.0000000000            |
| 1 f                              |                         |
| 0.3110000000                     | 1.0000000000            |
| 1 g                              |                         |
| 0.6730000000                     | 1.0000000000            |
| *                                |                         |
| *                                |                         |
| c def2-QZVP                      |                         |
| # c (15s8p3d2f1g) / [7s4p3d2f1g] | {8211111/5111/111/11/1} |
| *                                |                         |
| 8 s                              |                         |
| 67025.071029                     | 0.38736308501E-04       |
| 10039.986538                     | 0.30107917575E-03       |
| 2284.9316911                     | 0.15787918095E-02       |
| 647.14122130                     | 0.66087087195E-02       |
| 211.09472335                     | 0.23367123250E-01       |
| 76.177643862                     | 0.70420716898E-01       |
| 29.633839163                     | 0.17360344953           |
| 12.187785081                     | 0.32292305648           |
| 2 s                              |                         |
| 53.026006299                     | 0.74897404492E-01       |
| 15.258502776                     | 0.76136220983           |
| 1 s                              |                         |
| 5.2403957464                     | 1.0000000000            |

|                                  |                         |  |
|----------------------------------|-------------------------|--|
| 1 s                              |                         |  |
| 2.2905022379                     | 1.0000000000            |  |
| 1 s                              |                         |  |
| 0.69673283006                    | 1.0000000000            |  |
| 1 s                              |                         |  |
| 0.27599337363                    | 1.0000000000            |  |
| 1 s                              |                         |  |
| 0.10739884389                    | 1.0000000000            |  |
| 5 p                              |                         |  |
| 105.12555082                     | 0.84647553844E-03       |  |
| 24.884461066                     | 0.66274038534E-02       |  |
| 7.8637230826                     | 0.30120390419E-01       |  |
| 2.8407001835                     | 0.99951435476E-01       |  |
| 1.1227137335                     | 0.23826299282           |  |
| 1 p                              |                         |  |
| 0.46050725555                    | 1.0000000000            |  |
| 1 p                              |                         |  |
| 0.18937530913                    | 1.0000000000            |  |
| 1 p                              |                         |  |
| 0.75983791611E-01                | 1.0000000000            |  |
| 1 d                              |                         |  |
| 1.8480000000                     | 1.0000000000            |  |
| 1 d                              |                         |  |
| 0.64900000000                    | 1.0000000000            |  |
| 1 d                              |                         |  |
| 0.22800000000                    | 1.0000000000            |  |
| 1 f                              |                         |  |
| 1.4190000000                     | 1.0000000000            |  |
| 1 f                              |                         |  |
| 0.48500000000                    | 1.0000000000            |  |
| 1 g                              |                         |  |
| 1.0110000000                     | 1.0000000000            |  |
| *                                |                         |  |
| *                                |                         |  |
| n def2-QZVP                      |                         |  |
| # n (15s8p3d2f1g) / [7s4p3d2f1g] | {8211111/5111/111/11/1} |  |
| *                                |                         |  |
| 8 s                              |                         |  |
| 90726.889210                     | 0.39257887368E-04       |  |
| 13590.528801                     | 0.30513316455E-03       |  |
| 3092.9883781                     | 0.16000560446E-02       |  |
| 875.99876362                     | 0.66982937306E-02       |  |
| 285.74469982                     | 0.23690078765E-01       |  |
| 103.11913417                     | 0.71455405268E-01       |  |
| 40.128556777                     | 0.17632774876           |  |
| 16.528095704                     | 0.32677592815           |  |
| 2 s                              |                         |  |
| 69.390960983                     | 0.80052094386E-01       |  |
| 20.428200596                     | 0.78268063538           |  |
| 1 s                              |                         |  |
| 7.1292587972                     | 1.0000000000            |  |
| 1 s                              |                         |  |
| 3.1324304893                     | 1.0000000000            |  |
| 1 s                              |                         |  |
| 0.98755778723                    | 1.0000000000            |  |
| 1 s                              |                         |  |
| 0.38765721307                    | 1.0000000000            |  |
| 1 s                              |                         |  |
| 0.14909883075                    | 1.0000000000            |  |
| 5 p                              |                         |  |

|                                  |                          |  |
|----------------------------------|--------------------------|--|
| 150.05742670                     | -0.86216165986E-03       |  |
| 35.491599483                     | -0.68571273236E-02       |  |
| 11.247864223                     | -0.31795688855E-01       |  |
| 4.0900305195                     | -0.10537396822           |  |
| 1.6220573146                     | -0.24519708041           |  |
| 1 p                              |                          |  |
| 0.66442261530                    | 1.0000000000             |  |
| 1 p                              |                          |  |
| 0.27099770070                    | 1.0000000000             |  |
| 1 p                              |                          |  |
| 0.10688749984                    | 1.0000000000             |  |
| 1 d                              |                          |  |
| 2.8370000000                     | 1.0000000000             |  |
| 1 d                              |                          |  |
| 0.96800000000                    | 1.0000000000             |  |
| 1 d                              |                          |  |
| 0.33500000000                    | 1.0000000000             |  |
| 1 f                              |                          |  |
| 2.0270000000                     | 1.0000000000             |  |
| 1 f                              |                          |  |
| 0.68500000000                    | 1.0000000000             |  |
| 1 g                              |                          |  |
| 1.4270000000                     | 1.0000000000             |  |
| *                                |                          |  |
| *                                |                          |  |
| o def2-QZVP                      |                          |  |
| # o (15s8p3d2f1g) / [7s4p3d2f1g] | {82111111/5111/111/11/1} |  |
| *                                |                          |  |
| 8 s                              |                          |  |
| 116506.46908                     | 0.40383857939E-04        |  |
| 17504.349724                     | 0.31255139004E-03        |  |
| 3993.4513230                     | 0.16341473495E-02        |  |
| 1133.0063186                     | 0.68283224757E-02        |  |
| 369.99569594                     | 0.24124410221E-01        |  |
| 133.62074349                     | 0.72730206154E-01        |  |
| 52.035643649                     | 0.17934429892            |  |
| 21.461939313                     | 0.33059588895            |  |
| 2 s                              |                          |  |
| 89.835051252                     | 0.96468652996E-01        |  |
| 26.428010844                     | 0.94117481120            |  |
| 1 s                              |                          |  |
| 9.2822824649                     | 1.0000000000             |  |
| 1 s                              |                          |  |
| 4.0947728533                     | 1.0000000000             |  |
| 1 s                              |                          |  |
| 1.3255349078                     | 1.0000000000             |  |
| 1 s                              |                          |  |
| 0.51877230787                    | 1.0000000000             |  |
| 1 s                              |                          |  |
| 0.19772676454                    | 1.0000000000             |  |
| 5 p                              |                          |  |
| 191.15255810                     | 0.25115697705E-02        |  |
| 45.233356739                     | 0.20039240864E-01        |  |
| 14.353465922                     | 0.93609064762E-01        |  |
| 5.2422371832                     | 0.30618127124            |  |
| 2.0792418599                     | 0.67810501439            |  |
| 1 p                              |                          |  |
| 0.84282371424                    | 1.0000000000             |  |
| 1 p                              |                          |  |
| 0.33617694891                    | 1.0000000000             |  |

```

1 p
0.12863997974      1.00000000000
1 d
3.77500000000     1.00000000000
1 d
1.30000000000     1.00000000000
1 d
0.44400000000     1.00000000000
1 f
2.66600000000     1.00000000000
1 f
0.85900000000     1.00000000000
1 g
1.84600000000     1.00000000000
*
*
f def2-QZVP
# f      (15s8p3d2f1g) / [7s4p3d2f1g]      {82111111/5111/111/11/1}
*
8 s
132535.97345      0.47387482743E-04
19758.112588      0.37070120897E-03
4485.1996947      0.19450784713E-02
1273.8151020      0.80573291994E-02
418.93831236      0.27992880781E-01
152.55721985      0.82735120175E-01
59.821524823      0.19854169012
24.819076932      0.34860632233
2 s
100.74446673      0.10505068816
30.103728290      0.94068472434
1 s
10.814283272      1.00000000000
1 s
4.8172886770      1.00000000000
1 s
1.6559334213      1.00000000000
1 s
0.64893519582      1.00000000000
1 s
0.24778104545      1.00000000000
5 p
240.96654114      0.30389933451E-02
57.020699781      0.24357738582E-01
18.126952120      0.11442925768
6.6457404621      0.37064659853
2.6375722892      0.79791551766
1 p
1.0638217200      1.00000000000
1 p
0.41932562750      1.00000000000
1 p
0.15747588299      1.00000000000
1 d
5.01400000000     1.00000000000
1 d
1.72500000000     1.00000000000
1 d
0.58600000000     1.00000000000
1 f

```

```

3.5620000000      1.0000000000
 1 f
1.1480000000      1.0000000000
 1 g
2.3760000000      1.0000000000
*
*
ne def2-QZVP
# ne      (15s9p3d2f1g) / [7s4p3d2f1g]      {82111111/6111/111/11/1}
*
 8 s
160676.27955      0.47387482743E-04
23953.195039      0.37070120897E-03
5437.5063711      0.19450784713E-02
1544.2741024      0.80573291994E-02
507.88814269      0.27992880781E-01
184.94847750      0.82735120175E-01
72.522952039      0.19854169012
30.088713575      0.34860632233
 2 s
120.68434940      0.10400597014
36.074294857      0.91999988986
 1 s
13.052091210      1.0000000000
 1 s
5.7974783353      1.0000000000
 1 s
2.0478626895      1.0000000000
 1 s
0.80214571994      1.0000000000
 1 s
0.30548672205      1.0000000000
 6 p
498.43397466      0.43118261050E-03
118.14109217      0.36206397703E-02
38.032529735      0.18245344081E-01
14.183731950      0.65133035572E-01
5.7864190721      0.16708915089
2.4599622160      0.29268019613
 1 p
1.0421999498      1.0000000000
 1 p
0.42987748916      1.0000000000
 1 p
0.16889708453      1.0000000000
 1 d
6.4710000000      1.0000000000
 1 d
2.2130000000      1.0000000000
 1 d
0.74700000000      1.0000000000
 1 f
4.6570000000      1.0000000000
 1 f
1.5240000000      1.0000000000
 1 g
2.9830000000      1.0000000000
*
*
na def2-QZVP

```

```

# na      (20s12p3d1f) / [9s5p3d1f]      {(10)31111111/81111/111/1}
*
10 s
379852.20081      0.20671384468E-04
56886.006378      0.16070466617E-03
12942.701838      0.84462905848E-03
3664.3017904      0.35519026029E-02
1194.7417499      0.12754034468E-01
430.98192917      0.39895462742E-01
167.83169424      0.10720154498
69.306669040      0.23339516913
29.951170886      0.36333077287
13.380791097      0.30544770974
3 s
121.74011283      0.36142427284E-01
37.044143387      0.28820961687
13.995422624      0.79337384869
1 s
5.9827797428      1.0000000000
1 s
2.4830455118      1.0000000000
1 s
1.0452506187      1.0000000000
1 s
0.43875640383      1.0000000000
1 s
0.65595633185E-01      1.0000000000
1 s
0.30561925072E-01      1.0000000000
1 s
0.15509064018E-01      1.0000000000
8 p
690.77627017      0.37478518415E-03
163.82806121      0.31775441030E-02
52.876460769      0.16333581338E-01
19.812270493      0.59754902585E-01
8.1320378784      0.15879328812
3.4969068377      0.29049363260
1.5117244146      0.36368131139
0.64479294912      0.28195867334
1 p
0.26145823312      1.0000000000
1 p
0.11704726116      1.0000000000
1 p
0.40494747666E-01      1.0000000000
1 p
0.15666707355E-01      1.0000000000
1 d
2.9000000000      1.0000000000
1 d
0.2300000000      1.0000000000
1 d
0.75700000000E-01      1.0000000000
1 f
0.1350000000      1.0000000000
*
*
mg def2-QZVP
# mg      (20s12p4d1f) / [9s5p4d1f]      {(10)31111111/81111/1111/1}

```

\*

|                   |                   |
|-------------------|-------------------|
| 10 s              |                   |
| 605967.78753      | 0.14430176617E-04 |
| 90569.094692      | 0.11249871807E-03 |
| 20574.252844      | 0.59264972450E-03 |
| 5818.6284865      | 0.24988770424E-02 |
| 1895.6296075      | 0.90230775141E-02 |
| 683.45941021      | 0.28579919806E-01 |
| 266.18219762      | 0.79064453923E-01 |
| 110.11220010      | 0.18269337814     |
| 47.777041234      | 0.32157193967     |
| 21.542166149      | 0.35028259389     |
| 3 s               |                   |
| 174.12136378      | 0.22931111278E-01 |
| 53.484972498      | 0.19151777552     |
| 20.500213307      | 0.61155711055     |
| 1 s               |                   |
| 9.8056826922      | 1.0000000000      |
| 1 s               |                   |
| 3.5402989348      | 1.0000000000      |
| 1 s               |                   |
| 1.5450850046      | 1.0000000000      |
| 1 s               |                   |
| 0.66540195432     | 1.0000000000      |
| 1 s               |                   |
| 0.14355439071     | 1.0000000000      |
| 1 s               |                   |
| 0.66624673468E-01 | 1.0000000000      |
| 1 s               |                   |
| 0.29772648266E-01 | 1.0000000000      |
| 8 p               |                   |
| 893.20460829      | 0.34958267428E-03 |
| 211.78258286      | 0.29811890111E-02 |
| 68.443200537      | 0.15517845758E-01 |
| 25.727265349      | 0.57578659557E-01 |
| 10.606634281      | 0.15610307853     |
| 4.5934126484      | 0.29230912580     |
| 2.0100469807      | 0.37219024072     |
| 0.87384841536     | 0.27578088891     |
| 1 p               |                   |
| 0.35615076666     | 1.0000000000      |
| 1 p               |                   |
| 0.18995954356     | 1.0000000000      |
| 1 p               |                   |
| 0.74580135669E-01 | 1.0000000000      |
| 1 p               |                   |
| 0.29221641309E-01 | 1.0000000000      |
| 1 d               |                   |
| 3.8100000000      | 1.0000000000      |
| 1 d               |                   |
| 0.6500000000      | 1.0000000000      |
| 1 d               |                   |
| 0.2000000000      | 1.0000000000      |
| 1 d               |                   |
| 0.52000000000E-01 | 1.0000000000      |
| 1 f               |                   |
| 0.1600000000      | 1.0000000000      |

\*

\*

al def2-QZVP



# a1 (20s14p4d2f1g) / [9s6p4d2f1g] {(10)  
31111111/821111/1111/11/1}

\*

|                   |                   |
|-------------------|-------------------|
| 10 s              |                   |
| 754550.78265      | 0.13421335886E-04 |
| 112999.38922      | 0.10433210786E-03 |
| 25715.831759      | 0.54841772080E-03 |
| 7283.6030283      | 0.23089081391E-02 |
| 2376.0008796      | 0.83309974593E-02 |
| 857.65468087      | 0.26417963653E-01 |
| 334.38922598      | 0.73443646426E-01 |
| 138.48504731      | 0.17184039139     |
| 60.150368808      | 0.31041980030     |
| 27.127610860      | 0.35669190596     |
| 3 s               |                   |
| 225.36500065      | 0.21522039783E-01 |
| 69.341968124      | 0.18531780493     |
| 26.619335712      | 0.63533181245     |
| 1 s               |                   |
| 12.349420671      | 1.0000000000      |
| 1 s               |                   |
| 4.5878785994      | 1.0000000000      |
| 1 s               |                   |
| 2.0571338103      | 1.0000000000      |
| 1 s               |                   |
| 0.90864549395     | 1.0000000000      |
| 1 s               |                   |
| 0.24226988038     | 1.0000000000      |
| 1 s               |                   |
| 0.11248136869     | 1.0000000000      |
| 1 s               |                   |
| 0.48156492817E-01 | 1.0000000000      |
| 8 p               |                   |
| 1489.6119522      | 0.20177122443E-03 |
| 353.01399267      | 0.17508109203E-02 |
| 114.40764069      | 0.94424704664E-02 |
| 43.312186111      | 0.36868004006E-01 |
| 18.027322216      | 0.10892874007     |
| 7.9675432403      | 0.23265901004     |
| 3.6090399541      | 0.34643587076     |
| 1.6456081630      | 0.33440809866     |
| 2 p               |                   |
| 34.731187489      | 0.17823073020E-01 |
| 1.2553083630      | -0.59991263926    |
| 1 p               |                   |
| 0.73635534282     | 1.0000000000      |
| 1 p               |                   |
| 0.24686465559     | 1.0000000000      |
| 1 p               |                   |
| 0.94821971828E-01 | 1.0000000000      |
| 1 p               |                   |
| 0.36214165654E-01 | 1.0000000000      |
| 1 d               |                   |
| 1.9700000000      | 1.0000000000      |
| 1 d               |                   |
| 0.4370000000      | 1.0000000000      |
| 1 d               |                   |
| 0.1950000000      | 1.0000000000      |
| 1 d               |                   |
| 0.8000000000E-01  | 1.0000000000      |

```

1 f
0.15400000000 1.0000000000
1 f
0.40100000000 1.0000000000
1 g
0.35700000000 1.0000000000
*
*
si def2-QZVP
# si (20s14p4d2f1g) / [9s6p4d2f1g] {(10)}
31111111/821111/1111/11/1}
*
10 s
918070.69565 0.12658787192E-04
137485.25386 0.98408387461E-04
31287.772714 0.51731398244E-03
8861.6105697 0.21785441933E-02
2890.6943156 0.78656853716E-02
1043.4063979 0.24987553674E-01
406.80160276 0.69761818844E-01
168.48360207 0.16473362733
73.185628823 0.30285602647
32.998485420 0.36007260439
3 s
278.78751325 0.20185463814E-01
85.910228722 0.17720406747
32.992604031 0.63587860906
1 s
15.033693254 1.0000000000
1 s
5.7257514773 1.0000000000
1 s
2.6146521029 1.0000000000
1 s
1.1757833152 1.0000000000
1 s
0.35432330868 1.0000000000
1 s
0.16248335806 1.0000000000
1 s
0.68332457181E-01 1.0000000000
8 p
1775.8850516 0.20186971126E-03
420.83786849 0.17544314655E-02
136.42290243 0.95039532290E-02
51.700991737 0.37325741590E-01
21.559456002 0.11085396329
9.5559200095 0.23756407046
4.3529819473 0.35295783750
2.0096964381 0.32885931947
2 p
46.418153780 0.25858819154E-01
1.9076417796 -0.59874865899
1 p
0.92337221587 1.0000000000
1 p
0.34515720370 1.0000000000
1 p
0.13656834761 1.0000000000
1 p

```

```

0.52987060586E-01  1.0000000000
  1 d
  2.6450000000    1.0000000000
  1 d
0.608000000000    1.0000000000
  1 d
0.272000000000    1.0000000000
  1 d
0.113000000000    1.0000000000
  1 f
0.212000000000    1.0000000000
  1 f
0.541000000000    1.0000000000
  1 g
0.461000000000    1.0000000000
*
*
p def2-QZVP
# p      (20s14p4d2f1g) / [9s6p4d2f1g]      {(10)
31111111/821111/1111/11/1}
*
  10 s
  1090561.7138     0.12142449664E-04
  163316.39461     0.94395292614E-04
  37166.607451     0.49622262177E-03
  10526.880945     0.20900040747E-02
  3433.9976028     0.75489230025E-02
  1239.5360480     0.24010423937E-01
  483.27456199     0.67231473697E-01
  200.16911586     0.15978669881
  86.960394829     0.29735906782
  39.211283369     0.36187171850
  3 s
  336.75883662     0.19154721050E-01
  103.72179793     0.17134079100
  39.771861240     0.63689655985
  1 s
  17.888612952     1.0000000000
  1 s
  6.9644556879     1.0000000000
  1 s
  3.2198092087     1.0000000000
  1 s
  1.4669943979     1.0000000000
  1 s
0.47765437532     1.0000000000
  1 s
0.21637789241     1.0000000000
  1 s
0.90235894336E-01  1.0000000000
  8 p
  2019.6711374     0.21359172406E-03
  478.60125090     0.18568771399E-02
  155.14942504     0.10070690115E-01
  58.816356575     0.39605153679E-01
  24.544512785     0.11736067844
  10.883571061     0.24950540642
  4.9624791285     0.36421287984
  2.3002912343     0.31764127123
  2 p

```

|                                   |                   |
|-----------------------------------|-------------------|
| 59.371345016                      | 0.39432918004     |
| 3.0694590986                      | -6.3522960431     |
| 1 p                               |                   |
| 1.0634401739                      | 1.0000000000      |
| 1 p                               |                   |
| 0.45022152161                     | 1.0000000000      |
| 1 p                               |                   |
| 0.18267271344                     | 1.0000000000      |
| 1 p                               |                   |
| 0.71610333771E-01                 | 1.0000000000      |
| 1 d                               |                   |
| 3.3430000000                      | 1.0000000000      |
| 1 d                               |                   |
| 0.8070000000                      | 1.0000000000      |
| 1 d                               |                   |
| 0.3650000000                      | 1.0000000000      |
| 1 d                               |                   |
| 0.1540000000                      | 1.0000000000      |
| 1 f                               |                   |
| 0.2800000000                      | 1.0000000000      |
| 1 f                               |                   |
| 0.7030000000                      | 1.0000000000      |
| 1 g                               |                   |
| 0.5970000000                      | 1.0000000000      |
| *                                 |                   |
| *                                 |                   |
| s def2-QZVP                       |                   |
| # s (20s14p4d2f1g) / [9s6p4d2f1g] | {(10)}            |
| 31111111/821111/1111/11/1}        |                   |
| *                                 |                   |
| 10 s                              |                   |
| 1273410.9023                      | 0.11767088246E-04 |
| 190697.83007                      | 0.91478610166E-04 |
| 43397.885330                      | 0.48090078640E-03 |
| 12291.809677                      | 0.20257193592E-02 |
| 4009.7420824                      | 0.73190096406E-02 |
| 1447.3531030                      | 0.23300499900E-01 |
| 564.30102913                      | 0.65386213610E-01 |
| 233.74506243                      | 0.15614449910     |
| 101.56402814                      | 0.29318563787     |
| 45.805907187                      | 0.36287914289     |
| 3 s                               |                   |
| 394.27281503                      | 0.18753305081E-01 |
| 121.72249591                      | 0.16870726663     |
| 46.754125963                      | 0.63806830653     |
| 1 s                               |                   |
| 20.923008254                      | 1.0000000000      |
| 1 s                               |                   |
| 8.2685567800                      | 1.0000000000      |
| 1 s                               |                   |
| 3.8629345671                      | 1.0000000000      |
| 1 s                               |                   |
| 1.7794684781                      | 1.0000000000      |
| 1 s                               |                   |
| 0.61064260103                     | 1.0000000000      |
| 1 s                               |                   |
| 0.27412269445                     | 1.0000000000      |
| 1 s                               |                   |
| 0.11325939107                     | 1.0000000000      |
| 8 p                               |                   |

|                                    |                    |
|------------------------------------|--------------------|
| 2189.8930459                       | 0.23912552864E-03  |
| 518.94596592                       | 0.20772032158E-02  |
| 168.19560151                       | 0.11242420571E-01  |
| 63.745282788                       | 0.44069933941E-01  |
| 26.597033077                       | 0.12918778608      |
| 11.774251449                       | 0.26910820167      |
| 5.3534379024                       | 0.37855928620      |
| 2.4701911802                       | 0.29692134655      |
| 2 p                                |                    |
| 82.120288349                       | -0.39420318847E-01 |
| 4.9523532869                       | 0.64048403090      |
| 1 p                                |                    |
| 1.0828262029                       | 1.0000000000       |
| 1 p                                |                    |
| 0.49271277356                      | 1.0000000000       |
| 1 p                                |                    |
| 0.20483450942                      | 1.0000000000       |
| 1 p                                |                    |
| 0.80743615716E-01                  | 1.0000000000       |
| 1 d                                |                    |
| 4.1590000000                       | 1.0000000000       |
| 1 d                                |                    |
| 1.0190000000                       | 1.0000000000       |
| 1 d                                |                    |
| 0.4640000000                       | 1.0000000000       |
| 1 d                                |                    |
| 0.1940000000                       | 1.0000000000       |
| 1 f                                |                    |
| 0.3350000000                       | 1.0000000000       |
| 1 f                                |                    |
| 0.8690000000                       | 1.0000000000       |
| 1 g                                |                    |
| 0.6830000000                       | 1.0000000000       |
| *                                  |                    |
| *                                  |                    |
| c1 def2-QZVP                       |                    |
| # c1 (20s14p4d2f1g) / [9s6p4d2f1g] | {(10)}             |
| 31111111/821111/1111/11/1}         |                    |
| *                                  |                    |
| 10 s                               |                    |
| 1467459.0095                       | 0.11478257194E-04  |
| 219756.16433                       | 0.89234299775E-04  |
| 50010.770301                       | 0.46911086186E-03  |
| 14164.823918                       | 0.19762446133E-02  |
| 4620.746525                        | 0.71419937783E-02  |
| 1667.8991635                       | 0.22753219445E-01  |
| 650.29199265                       | 0.63959782953E-01  |
| 269.38037376                       | 0.15331059238      |
| 117.06752106                       | 0.28986952417      |
| 52.811766843                       | 0.36348071452      |
| 3 s                                |                    |
| 461.42769988                       | 0.18019457578E-01  |
| 142.12665355                       | 0.16489442314      |
| 54.437838768                       | 0.63891587584      |
| 1 s                                |                    |
| 24.160770219                       | 1.0000000000       |
| 1 s                                |                    |
| 9.7083540306                       | 1.0000000000       |
| 1 s                                |                    |
| 4.5640696733                       | 1.0000000000       |

|                                    |                    |  |
|------------------------------------|--------------------|--|
| 1 s                                |                    |  |
| 2.1194744832                       | 1.0000000000       |  |
| 1 s                                |                    |  |
| 0.75722365394                      | 1.0000000000       |  |
| 1 s                                |                    |  |
| 0.33747224597                      | 1.0000000000       |  |
| 1 s                                |                    |  |
| 0.13860775149                      | 1.0000000000       |  |
| 8 p                                |                    |  |
| 2501.9457890                       | 0.24242618410E-03  |  |
| 592.88059285                       | 0.21079961749E-02  |  |
| 192.18089186                       | 0.11432693869E-01  |  |
| 72.875710488                       | 0.44956698060E-01  |  |
| 30.436358370                       | 0.13197476145      |  |
| 13.490178902                       | 0.27493639225      |  |
| 6.1478071413                       | 0.38347236372      |  |
| 2.8450944820                       | 0.28871943885      |  |
| 2 p                                |                    |  |
| 105.39397936                       | -0.34311760144E-01 |  |
| 6.7369738513                       | 0.64060818902      |  |
| 1 p                                |                    |  |
| 1.2421095772                       | 1.0000000000       |  |
| 1 p                                |                    |  |
| 0.55669714254                      | 1.0000000000       |  |
| 1 p                                |                    |  |
| 0.23387801464                      | 1.0000000000       |  |
| 1 p                                |                    |  |
| 0.93164490890E-01                  | 1.0000000000       |  |
| 1 d                                |                    |  |
| 5.1910000000                       | 1.0000000000       |  |
| 1 d                                |                    |  |
| 1.2760000000                       | 1.0000000000       |  |
| 1 d                                |                    |  |
| 0.5830000000                       | 1.0000000000       |  |
| 1 d                                |                    |  |
| 0.2430000000                       | 1.0000000000       |  |
| 1 f                                |                    |  |
| 0.4230000000                       | 1.0000000000       |  |
| 1 f                                |                    |  |
| 1.0890000000                       | 1.0000000000       |  |
| 1 g                                |                    |  |
| 0.8270000000                       | 1.0000000000       |  |
| *                                  |                    |  |
| *                                  |                    |  |
| ar def2-QZVP                       |                    |  |
| # ar (20s14p4d2f1g) / [9s6p4d2f1g] | {(10)              |  |
| 31111111/821111/1111/11/1}         |                    |  |
| *                                  |                    |  |
| 10 s                               |                    |  |
| 1673421.9494                       | 0.11245990413E-04  |  |
| 250601.75373                       | 0.87428115798E-04  |  |
| 57030.912120                       | 0.45961641275E-03  |  |
| 16153.303915                       | 0.19363890742E-02  |  |
| 5269.4109288                       | 0.69994046497E-02  |  |
| 1902.0315541                       | 0.22312068196E-01  |  |
| 741.57677159                       | 0.62808077697E-01  |  |
| 307.20901906                       | 0.15101140997      |  |
| 133.52786203                       | 0.28713661177      |  |
| 60.253381291                       | 0.36385490107      |  |
| 3 s                                |                    |  |

|                                                               |                    |
|---------------------------------------------------------------|--------------------|
| 522.02426206                                                  | 0.18071323116E-01  |
| 161.51290469                                                  | 0.16449219884      |
| 62.126369433                                                  | 0.63897334899      |
| 1 s                                                           |                    |
| 27.590930012                                                  | 1.0000000000       |
| 1 s                                                           |                    |
| 11.175528881                                                  | 1.0000000000       |
| 1 s                                                           |                    |
| 5.2959065137                                                  | 1.0000000000       |
| 1 s                                                           |                    |
| 2.4782798895                                                  | 1.0000000000       |
| 1 s                                                           |                    |
| 0.91262095059                                                 | 1.0000000000       |
| 1 s                                                           |                    |
| 0.40426067549                                                 | 1.0000000000       |
| 1 s                                                           |                    |
| 0.16562886306                                                 | 1.0000000000       |
| 8 p                                                           |                    |
| 2868.4504581                                                  | 0.24010435121E-03  |
| 679.71869590                                                  | 0.20904788665E-02  |
| 220.36758824                                                  | 0.11369316839E-01  |
| 83.620439734                                                  | 0.44901977398E-01  |
| 34.964322657                                                  | 0.13237156770      |
| 15.525131784                                                  | 0.27709277600      |
| 7.0992979806                                                  | 0.38613979646      |
| 3.3021336602                                                  | 0.28492925372      |
| 2 p                                                           |                    |
| 128.78765667                                                  | -0.30509457751E-01 |
| 8.4357867977                                                  | 0.64101621070      |
| 1 p                                                           |                    |
| 1.4618661855                                                  | 1.0000000000       |
| 1 p                                                           |                    |
| 0.64658010096                                                 | 1.0000000000       |
| 1 p                                                           |                    |
| 0.27229295755                                                 | 1.0000000000       |
| 1 p                                                           |                    |
| 0.10905182449                                                 | 1.0000000000       |
| 1 d                                                           |                    |
| 6.3150000000                                                  | 1.0000000000       |
| 1 d                                                           |                    |
| 1.5620000000                                                  | 1.0000000000       |
| 1 d                                                           |                    |
| 0.7150000000                                                  | 1.0000000000       |
| 1 d                                                           |                    |
| 0.2970000000                                                  | 1.0000000000       |
| 1 f                                                           |                    |
| 0.5430000000                                                  | 1.0000000000       |
| 1 f                                                           |                    |
| 1.3250000000                                                  | 1.0000000000       |
| 1 g                                                           |                    |
| 1.0070000000                                                  | 1.0000000000       |
| *                                                             |                    |
| *                                                             |                    |
| k def2-QZVP                                                   |                    |
| # k (24s18p4d1f) / [11s6p4d1f] {(11)4111111111/951111/1111/1} |                    |
| *                                                             |                    |
| 11 s                                                          |                    |
| 2022075.1391                                                  | 0.10144874011E-04  |
| 303044.65568                                                  | 0.78783500963E-04  |
| 69013.938490                                                  | 0.41380919674E-03  |

|                   |                    |
|-------------------|--------------------|
| 19559.244615      | 0.17427571893E-02  |
| 6383.8934901      | 0.63004086126E-02  |
| 2305.3502858      | 0.20125347032E-01  |
| 899.14418101      | 0.56966060520E-01  |
| 372.59500133      | 0.13882654093      |
| 161.97635247      | 0.27132285414      |
| 73.085553853      | 0.36383620662      |
| 33.595644762      | 0.24724464776      |
| 4 s               |                    |
| 685.49855365      | 0.44367463797E-02  |
| 211.66163373      | 0.42502718169E-01  |
| 80.851405131      | 0.18467742018      |
| 35.108667236      | 0.29353173891      |
| 1 s               |                    |
| 14.409437283      | 1.0000000000       |
| 1 s               |                    |
| 6.8697147262      | 1.0000000000       |
| 1 s               |                    |
| 3.2121883687      | 1.0000000000       |
| 1 s               |                    |
| 1.2610484365      | 1.0000000000       |
| 1 s               |                    |
| 0.61438946301     | 1.0000000000       |
| 1 s               |                    |
| 0.27264370973     | 1.0000000000       |
| 1 s               |                    |
| 0.77173005207E-01 | 1.0000000000       |
| 1 s               |                    |
| 0.40918397569E-01 | 1.0000000000       |
| 1 s               |                    |
| 0.17055762425E-01 | 1.0000000000       |
| 9 p               |                    |
| 3469.6649718      | 0.21340225970E-03  |
| 822.02356107      | 0.18637844836E-02  |
| 266.58406636      | 0.10211431546E-01  |
| 101.28048161      | 0.40799604728E-01  |
| 42.429490761      | 0.12257473393      |
| 18.912083912      | 0.26405833679      |
| 8.7017779030      | 0.38227164575      |
| 4.0854567599      | 0.29998812383      |
| 1.8667286060      | 0.78007265591E-01  |
| 5 p               |                    |
| 27.544639057      | -0.58222994163E-02 |
| 9.2098893609      | -0.26787531329E-01 |
| 1.7232877425      | 0.30666847665      |
| 0.77969303735     | 0.66927944165      |
| 0.34379047862     | 0.60376468615      |
| 1 p               |                    |
| 0.14346681918     | 1.0000000000       |
| 1 p               |                    |
| 0.68000000000E-01 | 1.0000000000       |
| 1 p               |                    |
| 0.32000000000E-01 | 1.0000000000       |
| 1 p               |                    |
| 0.15300000000E-01 | 1.0000000000       |
| 1 d               |                    |
| 1.7000000000      | 1.0000000000       |
| 1 d               |                    |
| 0.5100000000      | 1.0000000000       |
| 1 d               |                    |



```

0.180000000000      1.000000000000
  1 d
0.540000000000E-01  1.000000000000
  1 f
0.267000000000      1.000000000000
*
*
ca def2-QZVP
# ca      (24s18p6d1f) / [11s6p4d1f]      {(11)4111111111/951111/3111/1}
*
  11 s
2433075.4304      0.91625196182E-05
364160.43015      0.71271617974E-04
82898.747637      0.37433706369E-03
23499.730540      0.15762862250E-02
7671.2245985      0.57026102580E-02
2770.2330687      0.18255738108E-01
1080.6807550      0.51906421035E-01
448.04894531      0.12791238579
194.92007727      0.25586635231
88.039793338      0.36028678275
40.645696719      0.26838462020
  4 s
779.53331918      -0.18403005509E-01
241.18856300      -0.17649440544
92.403869324      -0.77662799584
39.786090342      -1.3352155444
  1 s
18.195864278      1.000000000000
  1 s
8.3321457067      1.000000000000
  1 s
3.9190196209      1.000000000000
  1 s
1.6667099493      1.000000000000
  1 s
0.80891084908      1.000000000000
  1 s
0.36174199934      1.000000000000
  1 s
0.82379874526E-01  1.000000000000
  1 s
0.47947864375E-01  1.000000000000
  1 s
0.22308112408E-01  1.000000000000
  9 p
4064.2232796      0.19780891021E-03
962.91550624      0.17307465902E-02
312.34501046      0.95298721105E-02
118.76056036      0.38387459783E-01
49.816153133      0.11679256218
22.259679401      0.25637225097
10.286094124      0.37986193747
4.8606982416      0.30805760637
2.2525682942      0.85755999942E-01
  5 p
31.467555443      -0.42441487483E-02
10.657589056      -0.19579425947E-01
2.050555426      0.21237507422
0.94362089228      0.46277871121

```

```

0.42709067504      0.39177495728
 1 p
0.17788187209      1.00000000000
 1 p
0.860000000000E-01  1.00000000000
 1 p
0.415000000000E-01  1.00000000000
 1 p
0.200000000000E-01  1.00000000000
 3 d
16.924012098      0.35543971560E-01
4.4655403330      0.18133698335
1.4347576200      0.48002060116
 1 d
0.46552376784      1.00000000000
 1 d
0.14097711082      1.00000000000
 1 d
0.41467009281E-01  1.00000000000
 1 f
0.32100000000      1.00000000000
*
*
sc def2-QZVP
# sc      (24s18p9d3f1g) / [11s6p5d3f1g]      {(11)
4111111111/951111/51111/111/1}
*
 11 s
2855231.1264      0.84862794535E-05
427433.34221      0.65998092974E-04
97233.218545      0.34740968058E-03
27496.222846      0.14694099525E-02
8948.7324409      0.53410667286E-02
3221.0397292      0.17200652511E-01
1252.0534077      0.49287065332E-01
517.26093376      0.12273534550
224.33127242      0.24910183844
101.10551671      0.35884366997
46.684957855      0.27782811319
 4 s
947.75965484      0.36123019249E-02
293.07262846      0.35616224567E-01
111.70230657      0.16664064248
47.756215212      0.32531051399
 1 s
21.121984009      1.00000000000
 1 s
9.7765922198      1.00000000000
 1 s
4.5982699340      1.00000000000
 1 s
1.9928487767      1.00000000000
 1 s
0.95939954457      1.00000000000
 1 s
0.42566790070      1.00000000000
 1 s
0.98132196006E-01  1.00000000000
 1 s
0.56894222237E-01  1.00000000000

```

```

1 s
0.25369907195E-01 1.0000000000
9 p
4611.4680242 0.19180655992E-03
1092.4666458 0.16801897753E-02
354.41923265 0.92763338425E-02
134.83390286 0.37537202735E-01
56.610873926 0.11493045217
25.336605518 0.25446811084
11.741313238 0.37993352765
5.5697268625 0.30948776388
2.5949954062 0.86972259257E-01
5 p
35.951198081 -0.55780446917E-02
12.301020232 -0.25933825208E-01
2.3876557755 0.27489094204
1.1031823600 0.59208047142
0.50008479496 0.49113471853
1 p
0.20796508799 1.0000000000
1 p
0.10100000000 1.0000000000
1 p
0.48000000000E-01 1.0000000000
1 p
0.23000000000E-01 1.0000000000
5 d
73.531179748 0.22506354976E-02
21.764759639 0.16377610133E-01
7.9233701690 0.63330446952E-01
3.1847889778 0.17056208548
1.3427790019 0.30119020299
1 d
0.56149574983 1.0000000000
1 d
0.22764073650 1.0000000000
1 d
0.85211221793E-01 1.0000000000
1 d
0.35000000000E-01 1.0000000000
1 f
1.4810000000 1.0000000000
1 f
0.34500000000 1.0000000000
1 f
0.11000000000 1.0000000000
1 g
0.24700000000 1.0000000000
*
*
ti def2-QZVP
# ti (24s18p9d3f1g) / [11s6p5d3f1g] {(11)}
4111111111/951111/51111/111/1}
*
11 s
3070548.8651 0.86954016630E-05
460777.88643 0.67452737727E-04
104901.22889 0.35477293028E-03
29695.861199 0.14977525588E-02
9678.8892688 0.54309912055E-02

```

|                   |                    |
|-------------------|--------------------|
| 3490.1877912      | 0.17439360524E-01  |
| 1359.2217621      | 0.49835634640E-01  |
| 562.42721208      | 0.12379633943      |
| 244.22296250      | 0.25057490943      |
| 110.16668710      | 0.35934609007      |
| 50.881903357      | 0.27594242664      |
| 4 s               |                    |
| 965.95430789      | 0.41773927781E-02  |
| 299.27072059      | 0.40277148567E-01  |
| 114.83772939      | 0.17898686817      |
| 49.477578954      | 0.31783043543      |
| 1 s               |                    |
| 22.982839977      | 1.0000000000       |
| 1 s               |                    |
| 10.518305037      | 1.0000000000       |
| 1 s               |                    |
| 4.9774390567      | 1.0000000000       |
| 1 s               |                    |
| 2.1339846838      | 1.0000000000       |
| 1 s               |                    |
| 1.0342457284      | 1.0000000000       |
| 1 s               |                    |
| 0.46199774995     | 1.0000000000       |
| 1 s               |                    |
| 0.10621264194     | 1.0000000000       |
| 1 s               |                    |
| 0.54340347374E-01 | 1.0000000000       |
| 1 s               |                    |
| 0.25110217385E-01 | 1.0000000000       |
| 9 p               |                    |
| 5169.6755427      | 0.18802523596E-03  |
| 1225.0961638      | 0.16473458826E-02  |
| 397.60051934      | 0.91104554321E-02  |
| 151.36154684      | 0.36987450926E-01  |
| 63.613321773      | 0.11376329624      |
| 28.514560307      | 0.25345208574      |
| 13.248003298      | 0.38019402704      |
| 6.3048807760      | 0.30989136346      |
| 2.9493525821      | 0.87418944007E-01  |
| 5 p               |                    |
| 40.738772213      | -0.73233793267E-02 |
| 14.062358461      | -0.34282591082E-01 |
| 2.7460680961      | 0.35655009250      |
| 1.2713688141      | 0.76112035427      |
| 0.57610015545     | 0.62716743237      |
| 1 p               |                    |
| 0.23981820724     | 1.0000000000       |
| 1 p               |                    |
| 0.11000000000     | 1.0000000000       |
| 1 p               |                    |
| 0.50000000000E-01 | 1.0000000000       |
| 1 p               |                    |
| 0.23000000000E-01 | 1.0000000000       |
| 5 d               |                    |
| 89.589880075      | 0.21223030030E-02  |
| 26.591412960      | 0.15911819913E-01  |
| 9.7739715702      | 0.62875243121E-01  |
| 3.9625083655      | 0.17144170807      |
| 1.6890532654      | 0.30565506624      |
| 1 d               |                    |

```

0.71539771469      1.0000000000
  1 d
0.29366677748      1.0000000000
  1 d
0.11079094851      1.0000000000
  1 d
0.45000000000E-01  1.0000000000
  1 f
  2.0930000000      1.0000000000
  1 f
0.56200000000      1.0000000000
  1 f
0.19100000000      1.0000000000
  1 g
0.63400000000      1.0000000000
*
*
v def2-QZVP
# v      (24s18p9d3f1g) / [11s6p5d3f1g]      {(11)}
4111111111/951111/51111/111/1}
*
  11 s
  3360380.0382      0.87027840678E-05
  502646.73178      0.67786024965E-04
  114247.22867      0.35699229090E-03
  32321.972630      0.15075507352E-02
  10532.947271      0.54664377528E-02
  3798.3004439      0.17547310839E-01
  1479.6094715      0.50106594778E-01
  612.57405507      0.12431296066
  266.22103326      0.25117026883
  120.21980126      0.35926015903
  55.591180848      0.27505075685
  4 s
  1082.4768635      0.39326847695E-02
  334.94462061      0.38298477998E-01
  128.31559026      0.17259908827
  55.311589616      0.31287423870
  1 s
  25.108383036      1.0000000000
  1 s
  11.667553242      1.0000000000
  1 s
  5.5372073270      1.0000000000
  1 s
  2.3781007618      1.0000000000
  1 s
  1.1506947329      1.0000000000
  1 s
0.51283991040      1.0000000000
  1 s
0.11625711449      1.0000000000
  1 s
0.58272785598E-01  1.0000000000
  1 s
0.26662312245E-01  1.0000000000
  9 p
  5782.8035005      0.18344743045E-03
  1369.9392282      0.16095217453E-02
  444.53147129      0.89242268749E-02

```

|                                     |                    |
|-------------------------------------|--------------------|
| 169.25617556                        | 0.36375182379E-01  |
| 71.168730031                        | 0.11246803294      |
| 31.933358374                        | 0.25226107794      |
| 14.865336779                        | 0.38039695005      |
| 7.0921740091                        | 0.31068797325      |
| 3.3281157846                        | 0.88141200458E-01  |
| 5 p                                 |                    |
| 45.842906017                        | -0.56661391945E-02 |
| 15.940339016                        | -0.26718979445E-01 |
| 3.1257155025                        | 0.27354632707      |
| 1.4485867558                        | 0.57972883053      |
| 0.65577902825                       | 0.476011110515     |
| 1 p                                 |                    |
| 0.27311626644                       | 1.0000000000       |
| 1 p                                 |                    |
| 0.12200000000                       | 1.0000000000       |
| 1 p                                 |                    |
| 0.55000000000E-01                   | 1.0000000000       |
| 1 p                                 |                    |
| 0.25000000000E-01                   | 1.0000000000       |
| 5 d                                 |                    |
| 103.95047414                        | 0.21007158819E-02  |
| 30.901688665                        | 0.16015244877E-01  |
| 11.420321145                        | 0.64127456940E-01  |
| 4.6573272292                        | 0.17488905695      |
| 1.9963682623                        | 0.31003778048      |
| 1 d                                 |                    |
| 0.84967249531                       | 1.0000000000       |
| 1 d                                 |                    |
| 0.34953221876                       | 1.0000000000       |
| 1 d                                 |                    |
| 0.13165588233                       | 1.0000000000       |
| 1 d                                 |                    |
| 0.52000000000E-01                   | 1.0000000000       |
| 1 f                                 |                    |
| 2.9330000000                        | 1.0000000000       |
| 1 f                                 |                    |
| 0.8310000000                        | 1.0000000000       |
| 1 f                                 |                    |
| 0.2570000000                        | 1.0000000000       |
| 1 g                                 |                    |
| 1.0090000000                        | 1.0000000000       |
| *                                   |                    |
| *                                   |                    |
| cr def2-QZVP                        |                    |
| # cr (24s18p9d3f1g) / [11s6p5d3f1g] | {(11)}             |
| 4111111111/951111/51111/111/1}      |                    |
| *                                   |                    |
| 11 s                                |                    |
| 3637838.6820                        | 0.87693297699E-05  |
| 544864.46100                        | 0.68169050223E-04  |
| 123997.55079                        | 0.35844590272E-03  |
| 35116.733166                        | 0.15117006948E-02  |
| 11455.702298                        | 0.54731929774E-02  |
| 4135.9906712                        | 0.17539430107E-01  |
| 1613.2513581                        | 0.50004870927E-01  |
| 668.77932380                        | 0.12393518958      |
| 291.01365155                        | 0.25039606407      |
| 131.57328167                        | 0.35870470429      |
| 60.924567928                        | 0.27581148880      |

|                   |   |                    |
|-------------------|---|--------------------|
| 4                 | s |                    |
| 1196.2899601      |   | 0.77368642037E-02  |
| 369.76947592      |   | 0.75837835399E-01  |
| 141.54426084      |   | 0.34435148637      |
| 60.999228765      |   | 0.63249297923      |
| 1                 | s |                    |
| 27.599113358      |   | 1.0000000000       |
| 1                 | s |                    |
| 12.882112056      |   | 1.0000000000       |
| 1                 | s |                    |
| 6.1247513721      |   | 1.0000000000       |
| 1                 | s |                    |
| 2.6332895309      |   | 1.0000000000       |
| 1                 | s |                    |
| 1.2708482289      |   | 1.0000000000       |
| 1                 | s |                    |
| 0.56483575923     |   | 1.0000000000       |
| 1                 | s |                    |
| 0.12596808943     |   | 1.0000000000       |
| 1                 | s |                    |
| 0.62045607277E-01 |   | 1.0000000000       |
| 1                 | s |                    |
| 0.28144312720E-01 |   | 1.0000000000       |
| 9                 | p |                    |
| 6395.8781792      |   | 0.18104788151E-03  |
| 1515.1701574      |   | 0.15893658935E-02  |
| 491.70538681      |   | 0.88258739429E-02  |
| 187.28416675      |   | 0.36068946983E-01  |
| 78.800346444      |   | 0.11189649648      |
| 35.396291693      |   | 0.25202239843      |
| 16.509278879      |   | 0.38082266430      |
| 7.8947396863      |   | 0.31035222437      |
| 3.7136414465      |   | 0.87980310362E-01  |
| 5                 | p |                    |
| 51.259312534      |   | -0.60542038165E-02 |
| 17.934932523      |   | -0.28761764001E-01 |
| 3.5257174218      |   | 0.29087768170      |
| 1.6339163906      |   | 0.61267525056      |
| 0.73852413834     |   | 0.50126035018      |
| 1                 | p |                    |
| 0.30752368193     |   | 1.0000000000       |
| 1                 | p |                    |
| 0.13500000000     |   | 1.0000000000       |
| 1                 | p |                    |
| 0.59000000000E-01 |   | 1.0000000000       |
| 1                 | p |                    |
| 0.26000000000E-01 |   | 1.0000000000       |
| 5                 | d |                    |
| 118.24986288      |   | 0.21012757435E-02  |
| 35.193935700      |   | 0.16212269500E-01  |
| 13.057816022      |   | 0.65581852668E-01  |
| 5.3485602844      |   | 0.17849601449      |
| 2.3004233713      |   | 0.31376763016      |
| 1                 | d |                    |
| 0.98114328305     |   | 1.0000000000       |
| 1                 | d |                    |
| 0.40334183206     |   | 1.0000000000       |
| 1                 | d |                    |
| 0.15135589551     |   | 1.0000000000       |
| 1                 | d |                    |

```

0.600000000000E-01  1.0000000000
  1 f
3.7330000000  1.0000000000
  1 f
1.1470000000  1.0000000000
  1 f
0.3660000000  1.0000000000
  1 g
1.3820000000  1.0000000000
*
*
mn def2-QZVP
# mn      (24s18p10d3f1g) / [11s6p5d3f1g]      {(11)}
4111111111/951111/61111/111/1}
*
  11 s
4289357.6441      0.79360554972E-05
636361.00285     0.62542986761E-04
143637.27569     0.33226388724E-03
40406.345432     0.14130009568E-02
13104.363417     0.51560918319E-02
4705.0664255     0.16659574919E-01
1825.7125432     0.47908083403E-01
753.33816229     0.11994903752
326.47253285     0.24550296959
147.10300670     0.35822739571
67.987226869     0.28295764442
  4 s
1300.7266717     0.76025154141E-02
402.72027544     0.74365109808E-01
154.38971348     0.33780474819
66.443384613     0.62779331746
  1 s
30.975316006     1.0000000000
  1 s
14.222980890     1.0000000000
  1 s
6.7598265074     1.0000000000
  1 s
2.9087083287     1.0000000000
  1 s
1.3966507792     1.0000000000
  1 s
0.61792624091     1.0000000000
  1 s
0.13439483715     1.0000000000
  1 s
0.65195053803E-01  1.0000000000
  1 s
0.29415713624E-01  1.0000000000
  9 p
6483.2629658     0.20479778890E-03
1556.7134859     0.17525750185E-02
509.73925460     0.95798802458E-02
195.28408089     0.38681362983E-01
82.542547525     0.11832401588
37.212076731     0.26168459627
17.425804462     0.38400628821
8.3691376962     0.29704166759
3.9409000444     0.78263290323E-01

```



```

5 p
57.202741010 -0.47749099800E-02
20.090935947 -0.22989729915E-01
3.9357553763 0.23197065881
1.8181984012 0.48435204043
0.81881535281 0.39159479004
1 p
0.34038359193 1.0000000000
1 p
0.15000000000 1.0000000000
1 p
0.63000000000E-01 1.0000000000
1 p
0.27000000000E-01 1.0000000000
6 d
200.40254535 0.89549560240E-03
59.898225773 0.76257630942E-02
22.810570167 0.34523224226E-01
9.5874142097 0.10552676975
4.2933710910 0.22575377683
1.9537618373 0.32766533667
1 d
0.87378873598 1.0000000000
1 d
0.37597748904 1.0000000000
1 d
0.14811547592 1.0000000000
1 d
0.60000000000E-01 1.0000000000
1 f
4.3530000000 1.0000000000
1 f
1.3260000000 1.0000000000
1 f
0.40800000000 1.0000000000
1 g
1.7550000000 1.0000000000
*
*
fe def2-QZVP
# fe (24s18p10d3f1g) / [11s6p5d3f1g] {(11)}
4111111111/951111/61111/111/1}
*
11 s
4313154.4338 0.86712290122E-05
645875.08253 0.67423150519E-04
146981.87698 0.35448747955E-03
41630.615044 0.14948285557E-02
13580.620109 0.54136698440E-02
4902.0620613 0.17362460824E-01
1911.2900837 0.49566574059E-01
791.99837852 0.12309089705
344.54799181 0.24936705764
155.78722730 0.35858414677
72.179380315 0.27738221642
4 s
1417.9125091 0.74871631942E-02
439.23184195 0.73337584435E-01
168.51006820 0.33383143870
72.776269412 0.62022524641

```

|                   |                    |
|-------------------|--------------------|
| 1 s               |                    |
| 32.752961774      | 1.0000000000       |
| 1 s               |                    |
| 15.434336101      | 1.0000000000       |
| 1 s               |                    |
| 7.3639318205      | 1.0000000000       |
| 1 s               |                    |
| 3.1698832880      | 1.0000000000       |
| 1 s               |                    |
| 1.5243708395      | 1.0000000000       |
| 1 s               |                    |
| 0.67496281152     | 1.0000000000       |
| 1 s               |                    |
| 0.14718566032     | 1.0000000000       |
| 1 s               |                    |
| 0.70082216629E-01 | 1.0000000000       |
| 1 s               |                    |
| 0.31208269419E-01 | 1.0000000000       |
| 9 p               |                    |
| 7709.0587627      | 0.17711229843E-03  |
| 1826.4666323      | 0.15560056795E-02  |
| 592.84368362      | 0.86629536960E-02  |
| 225.93763245      | 0.35565954156E-01  |
| 95.164758890      | 0.11098847278      |
| 42.823132375      | 0.25177796624      |
| 20.036286581      | 0.38166911079      |
| 9.6159346283      | 0.30963598261      |
| 4.5393538787      | 0.87558276626E-01  |
| 5 p               |                    |
| 62.997519003      | -0.50910388724E-02 |
| 22.262748731      | -0.24540463235E-01 |
| 4.3900064942      | 0.24345605487      |
| 2.0328913928      | 0.50781898425      |
| 0.91592621576     | 0.41214895672      |
| 1 p               |                    |
| 0.38036653507     | 1.0000000000       |
| 1 p               |                    |
| 0.16000000000     | 1.0000000000       |
| 1 p               |                    |
| 0.67000000000E-01 | 1.0000000000       |
| 1 p               |                    |
| 0.28000000000E-01 | 1.0000000000       |
| 6 d               |                    |
| 218.33430163      | 0.93700006628E-03  |
| 65.256292616      | 0.80008769378E-02  |
| 24.866944817      | 0.36305286587E-01  |
| 10.473399301      | 0.11057189871      |
| 4.6947005007      | 0.23219588596      |
| 2.1315982534      | 0.32922859685      |
| 1 d               |                    |
| 0.94748004605     | 1.0000000000       |
| 1 d               |                    |
| 0.40346488831     | 1.0000000000       |
| 1 d               |                    |
| 0.15687414728     | 1.0000000000       |
| 1 d               |                    |
| 0.62000000000E-01 | 1.0000000000       |
| 1 f               |                    |
| 5.1030000000      | 1.0000000000       |
| 1 f               |                    |

```

1.5980000000      1.0000000000
 1 f
0.5050000000      1.0000000000
 1 g
2.1280000000      1.0000000000
*
*
co def2-QZVP
# co      (24s18p10d3f1g) / [11s6p5d3f1g]      {(11)
4111111111/951111/61111/111/1}
*
 11 s
4658206.5032      0.86609506454E-05
697560.87453      0.67336300186E-04
158759.87124      0.35399044899E-03
44969.099379      0.14926384309E-02
14670.714247      0.54053095095E-02
5295.8947250      0.17335233605E-01
2065.0581167      0.49486641301E-01
855.90627750      0.12289351961
372.48747255      0.24903230028
168.50576608      0.35838320259
78.128761566      0.27777974150
 4 s
1534.5149885      0.74464372833E-02
475.52976096      0.72993601986E-01
182.54836839      0.33243104986
78.916467177      0.61900490005
 1 s
35.500865522      1.0000000000
 1 s
16.790414486      1.0000000000
 1 s
8.0240232510      1.0000000000
 1 s
3.4571682964      1.0000000000
 1 s
1.6599835391      1.0000000000
 1 s
0.73380022453      1.0000000000
 1 s
0.15878613103      1.0000000000
 1 s
0.74535659476E-01  1.0000000000
 1 s
0.32867351695E-01  1.0000000000
 9 p
8425.4331352      0.17491775490E-03
1995.8758452      0.15378901702E-02
647.76765681      0.85752453448E-02
246.88261214      0.35295266911E-01
104.00952246      0.11050007672
46.827478138      0.25160924538
21.934444535      0.38209003019
10.540499528      0.30947119879
4.9820419385      0.87436873012E-01
 5 p
69.270787130      -0.61172424428E-02
24.583977935      -0.29655043898E-01
4.8562258878      0.29163333190

```

|                                      |                   |
|--------------------------------------|-------------------|
| 2.2480916102                         | 0.60629408335     |
| 1.0114285977                         | 0.49057440018     |
| 1 p                                  |                   |
| 0.41919905455                        | 1.0000000000      |
| 1 p                                  |                   |
| 0.17500000000                        | 1.0000000000      |
| 1 p                                  |                   |
| 0.73000000000E-01                    | 1.0000000000      |
| 1 p                                  |                   |
| 0.30000000000E-01                    | 1.0000000000      |
| 6 d                                  |                   |
| 237.58450966                         | 0.97593282671E-03 |
| 71.086896302                         | 0.83432571945E-02 |
| 27.119080683                         | 0.37958471100E-01 |
| 11.448239054                         | 0.11522936171     |
| 5.1391806672                         | 0.23843467913     |
| 2.3323492099                         | 0.33205699955     |
| 1 d                                  |                   |
| 1.0338662062                         | 0.33276836067     |
| 1 d                                  |                   |
| 0.43785146294                        | 0.22769290932     |
| 1 d                                  |                   |
| 0.16895004948                        | 0.74634129160E-01 |
| 1 d                                  |                   |
| 0.66000000000E-01                    | 1.0000000000      |
| 1 f                                  |                   |
| 5.9750000000                         | 1.0000000000      |
| 1 f                                  |                   |
| 1.9030000000                         | 1.0000000000      |
| 1 f                                  |                   |
| 0.59400000000                        | 1.0000000000      |
| 1 g                                  |                   |
| 2.5000000000                         | 1.0000000000      |
| *                                    |                   |
| *                                    |                   |
| ni def2-QZVP                         |                   |
| # ni (24s18p10d3f1g) / [11s6p5d3f1g] | {(11)}            |
| 4111111111/951111/61111/111/1}       |                   |
| *                                    |                   |
| 11 s                                 |                   |
| 5037649.9532                         | 0.86072778771E-05 |
| 754246.39418                         | 0.66935354750E-04 |
| 171644.16010                         | 0.35190801168E-03 |
| 48617.230286                         | 0.14839082715E-02 |
| 15860.961795                         | 0.53736344264E-02 |
| 5726.0018653                         | 0.17233376287E-01 |
| 2232.9547317                         | 0.49211476915E-01 |
| 925.49649101                         | 0.12232504536     |
| 402.75336913                         | 0.24829251588     |
| 182.19422856                         | 0.35825476194     |
| 84.494109788                         | 0.27881865553     |
| 4 s                                  |                   |
| 1678.0564586                         | 0.82462870895E-02 |
| 519.21358326                         | 0.81505940361E-01 |
| 198.95881607                         | 0.37495727651     |
| 85.901180703                         | 0.70841743832     |
| 1 s                                  |                   |
| 38.435760123                         | 1.0000000000      |
| 1 s                                  |                   |
| 18.252349351                         | 1.0000000000      |

|                   |                    |
|-------------------|--------------------|
| 1 s               |                    |
| 8.7283616939      | 1.0000000000       |
| 1 s               |                    |
| 3.7616245662      | 1.0000000000       |
| 1 s               |                    |
| 1.8028217338      | 1.0000000000       |
| 1 s               |                    |
| 0.79507140513     | 1.0000000000       |
| 1 s               |                    |
| 0.17031720284     | 1.0000000000       |
| 1 s               |                    |
| 0.78971236177E-01 | 1.0000000000       |
| 1 s               |                    |
| 0.34503486750E-01 | 1.0000000000       |
| 9 p               |                    |
| 9156.5701453      | 0.17346418360E-03  |
| 2169.0239526      | 0.15257220493E-02  |
| 703.98918991      | 0.85163281036E-02  |
| 268.36293215      | 0.35117466952E-01  |
| 113.10288796      | 0.11020275383      |
| 50.955539222      | 0.25162601670      |
| 23.896708209      | 0.38246389853      |
| 11.498241522      | 0.30907230267      |
| 5.4410908056      | 0.87194377415E-01  |
| 5 p               |                    |
| 75.938560736      | -0.74635546629E-02 |
| 27.037350184      | -0.36453401627E-01 |
| 5.3404687432      | 0.35633549406      |
| 2.4700181361      | 0.73774121992      |
| 1.1095029064      | 0.59439383024      |
| 1 p               |                    |
| 0.45899767101     | 1.0000000000       |
| 1 p               |                    |
| 0.18700000000     | 1.0000000000       |
| 1 p               |                    |
| 0.76200000000E-01 | 1.0000000000       |
| 1 p               |                    |
| 0.31000000000E-01 | 1.0000000000       |
| 6 d               |                    |
| 258.11131142      | 0.23726274275E-02  |
| 77.254891371      | 0.20330132784E-01  |
| 29.500240033      | 0.92748486665E-01  |
| 12.477446945      | 0.28082284560      |
| 5.6070455111      | 0.57392657880      |
| 2.5427744163      | 0.78766058527      |
| 1 d               |                    |
| 1.1238296774      | 0.77868790423      |
| 1 d               |                    |
| 0.47361171459     | 0.52932234348      |
| 1 d               |                    |
| 0.18161858319     | 0.17478168242      |
| 1 d               |                    |
| 0.71000000000E-01 | 1.0000000000       |
| 1 f               |                    |
| 6.7580000000      | 1.0000000000       |
| 1 f               |                    |
| 2.1740000000      | 1.0000000000       |
| 1 f               |                    |
| 0.6810000000      | 1.0000000000       |
| 1 g               |                    |

```

2.8720000000      1.0000000000
*
*
cu def2-QZVP
# cu      (24s18p10d3f1g) / [11s6p5d3f1g]      {(11)}
4111111111/951111/61111/111/1}
*
11 s
5056467.8898      0.93501916365E-05
759457.83835      0.72323443222E-04
173524.88497      0.37813833845E-03
49327.259988      0.15870129862E-02
16144.149930      0.57220685294E-02
5844.5964680      0.18268390048E-01
2284.6812739      0.51893720863E-01
948.88232514      0.12796192366
413.66215455      0.25629891036
187.38942059      0.36064416138
86.872771648      0.26833664660
4 s
1744.0598287      0.88587079141E-02
540.93295513      0.86522785813E-01
207.99736224      0.38932285258
90.475793036      0.69777199902
1 s
38.869687699      1.0000000000
1 s
18.974829147      1.0000000000
1 s
9.0953644635      1.0000000000
1 s
3.8330020174      1.0000000000
1 s
1.8198891499      1.0000000000
1 s
0.79068098393      1.0000000000
1 s
0.14914142106      1.0000000000
1 s
0.72448090592E-01  1.0000000000
1 s
0.30959925368E-01  1.0000000000
9 p
9720.4614555      0.17828803512E-03
2302.7557452      0.15678108633E-02
747.48498314      0.87470094509E-02
285.00132623      0.36044549301E-01
120.15121609      0.11287209053
54.145261156      0.25647377341
25.406033563      0.38512918379
12.224331465      0.30316512356
5.7638720668      0.81677218969E-01
5 p
83.210837217      -0.63530359993E-02
29.694779129      -0.31383834666E-01
5.8248516206      0.30930039753
2.6746181180      0.63583925938
1.1841836775      0.50946045967
1 p
0.48043583535      1.0000000000

```

```

1 p
0.18700000000 1.0000000000
1 p
0.76200000000E-01 1.0000000000
1 p
0.31000000000E-01 1.0000000000
6 d
249.54025080 0.12432881244E-02
74.683914534 0.10456901995E-01
28.392717116 0.46451241249E-01
11.955968430 0.13541359729
5.3210744624 0.25852899978
2.3661189459 0.33168127635
1 d
1.0131863994 1.0000000000
1 d
0.40710035940 1.0000000000
1 d
0.14742541032 1.0000000000
1 d
0.71000000000E-01 1.0000000000
1 f
6.9620000000 1.0000000000
1 f
2.2330000000 1.0000000000
1 f
0.70400000000 1.0000000000
1 g
3.2450000000 1.0000000000
*
*
zn def2-QZVP
# zn (24s18p10d3f1g) / [11s6p5d3f1g] {(11)}
4111111111/951111/61111/111/1}
*
11 s
5742307.1507 0.86864381562E-05
861450.78790 0.67364668570E-04
196346.05866 0.35349715135E-03
55682.870737 0.14884153943E-02
18183.902394 0.53840916617E-02
6569.6448019 0.17252738209E-01
2563.5613276 0.49238679132E-01
1063.1147176 0.12235812174
462.89771078 0.24835390245
209.52821049 0.35830632832
97.240787991 0.27880259960
4 s
1929.2689992 0.83077002177E-02
598.07122307 0.81882590163E-01
229.69667336 0.37588060221
99.416819228 0.71067260445
1 s
44.241101421 1.0000000000
1 s
21.194367113 1.0000000000
1 s
10.158731597 1.0000000000
1 s
4.3746176158 1.0000000000

```

|                   |                    |
|-------------------|--------------------|
| 1 s               |                    |
| 2.0901489071      | 1.0000000000       |
| 1 s               |                    |
| 0.91869136437     | 1.0000000000       |
| 1 s               |                    |
| 0.19278660606     | 1.0000000000       |
| 1 s               |                    |
| 0.87329915171E-01 | 1.0000000000       |
| 1 s               |                    |
| 0.37552217126E-01 | 1.0000000000       |
| 9 p               |                    |
| 10690.445107      | 0.17142867222E-03  |
| 2532.3159340      | 0.15088012830E-02  |
| 821.94295003      | 0.84368777910E-02  |
| 313.42757800      | 0.34898103208E-01  |
| 132.18314247      | 0.10993617353      |
| 59.620554387      | 0.25207277070      |
| 28.019488868      | 0.38325657524      |
| 13.511704850      | 0.30787091255      |
| 6.4053711253      | 0.86411696761E-01  |
| 5 p               |                    |
| 89.981131918      | -0.96262847843E-02 |
| 32.241767106      | -0.47509407258E-01 |
| 6.3809448581      | 0.45834100431      |
| 2.9477928353      | 0.94473799128      |
| 1.3200854955      | 0.75923464871      |
| 1 p               |                    |
| 0.54424674445     | 1.0000000000       |
| 1 p               |                    |
| 0.25799971797     | 1.0000000000       |
| 1 p               |                    |
| 0.92863192359E-01 | 1.0000000000       |
| 1 p               |                    |
| 0.34059341410E-01 | 1.0000000000       |
| 6 d               |                    |
| 305.22298937      | 0.27359792434E-02  |
| 91.468273202      | 0.23585229776E-01  |
| 34.986985968      | 0.10858422440      |
| 14.849415187      | 0.32843594226      |
| 6.6858545707      | 0.66180235634      |
| 3.0309412620      | 0.89165339320      |
| 1 d               |                    |
| 1.3355050671      | 1.0000000000       |
| 1 d               |                    |
| 0.55883176392     | 1.0000000000       |
| 1 d               |                    |
| 0.21180799287     | 1.0000000000       |
| 1 d               |                    |
| 0.83000000000E-01 | 1.0000000000       |
| 1 f               |                    |
| 8.0200000000      | 1.0000000000       |
| 1 f               |                    |
| 2.6140000000      | 1.0000000000       |
| 1 f               |                    |
| 0.83600000000     | 1.0000000000       |
| 1 g               |                    |
| 3.6170000000      | 1.0000000000       |

\*

\*

ga def2-QZVP



# ga (24s19p10d2f1g) / [11s7p4d2f1g] {(11)  
4111111111/9241111/7111/11/1}

\*

|                   |                    |
|-------------------|--------------------|
| 11 s              |                    |
| 6623802.0274      | 0.79091326051E-05  |
| 987904.07075      | 0.61835727406E-04  |
| 224132.05899      | 0.32636322451E-03  |
| 63315.192943      | 0.13810365049E-02  |
| 20611.312702      | 0.50153772104E-02  |
| 7429.1672482      | 0.16130936803E-01  |
| 2894.2071720      | 0.46240827188E-01  |
| 1198.9915786      | 0.11579099571      |
| 521.82003812      | 0.23834840794      |
| 236.27549237      | 0.35374255971      |
| 109.98395671      | 0.29055721918      |
| 4 s               |                    |
| 2101.2587253      | 0.83039611523E-02  |
| 650.97022519      | 0.82254127688E-01  |
| 250.22438356      | 0.38021717478      |
| 108.17616625      | 0.74503594690      |
| 1 s               |                    |
| 51.057486710      | 1.0000000000       |
| 1 s               |                    |
| 23.647474527      | 1.0000000000       |
| 1 s               |                    |
| 11.361701144      | 1.0000000000       |
| 1 s               |                    |
| 5.0178135897      | 1.0000000000       |
| 1 s               |                    |
| 2.4102674998      | 1.0000000000       |
| 1 s               |                    |
| 1.0741046685      | 1.0000000000       |
| 1 s               |                    |
| 0.25745075831     | 1.0000000000       |
| 1 s               |                    |
| 0.12175227548     | 1.0000000000       |
| 1 s               |                    |
| 0.52360599017E-01 | 1.0000000000       |
| 9 p               |                    |
| 14711.750483      | 0.11130990649E-03  |
| 3482.1451716      | 0.98495921142E-03  |
| 1130.2186655      | 0.55854182058E-02  |
| 431.54093448      | 0.23682413047E-01  |
| 182.41723648      | 0.78211587173E-01  |
| 82.706753603      | 0.19503829929      |
| 39.228128772      | 0.34131988495      |
| 19.201979939      | 0.35718665135      |
| 9.5056966689      | 0.16395955052      |
| 2 p               |                    |
| 92.615613022      | -0.85848284169E-01 |
| 33.750148165      | -0.39435019538     |
| 4 p               |                    |
| 7.3482283015      | 0.37941606569      |
| 3.7813384844      | 0.71306291866      |
| 2.3145183128      | 0.43210001481      |
| 0.80346859715     | 0.25838122797      |
| 1 p               |                    |
| 1.5423710087      | 1.0000000000       |
| 1 p               |                    |
| 0.32910239639     | 1.0000000000       |

```

1 p
0.11834088831      1.0000000000
1 p
0.41627877699E-01  1.0000000000
7 d
363.49565218      0.87402299276E-03
109.01749589      0.76751934098E-02
41.866430715      0.36388975341E-01
17.879279894      0.11325183017
8.1201893671      0.23770881294
3.7360611356      0.33306060389
1.6826812549      0.33130613756
1 d
0.72655790500     0.21895437571
1 d
0.28498585079     1.0000000000
1 d
0.11200000000     1.0000000000
1 f
0.18100000000     1.0000000000
1 f
0.47100000000     1.0000000000
1 g
0.40320000000     1.0000000000
*
*
ge def2-QZVP
# ge      (24s19p10d2f1g) / [11s7p4d2f1g]      {(11)
4111111111/9241111/7111/11/1}
*
11 s
7233056.0346      0.76638751457E-05
1082886.1731      0.59603601369E-04
246481.46959      0.31319088031E-03
69862.426955      0.13194051561E-02
22815.809662      0.47736099191E-02
8246.5369297      0.15319250467E-01
3219.9367257      0.43900870673E-01
1336.5743706      0.11028573632
582.87737501      0.22912630489
264.59511360      0.34779259246
123.77823320      0.29968722223
4 s
2311.1055804      0.75033084731E-02
716.27089868      0.74778386626E-01
275.45330910      0.35092882302
118.93292565      0.72055989686
1 s
58.435699085      1.0000000000
1 s
26.261575973      1.0000000000
1 s
12.664880671      1.0000000000
1 s
5.7269548505      1.0000000000
1 s
2.7555023203      1.0000000000
1 s
1.2432886754      1.0000000000
1 s

```

```

0.33107183846      1.0000000000
 1 s
0.15964081368      1.0000000000
 1 s
0.68463178923E-01  1.0000000000
 9 p
16555.711074       0.10199370391E-03
3914.9903745       0.90504190546E-03
1269.4766518       0.51558490762E-02
484.35437789       0.22010335708E-01
204.64985822       0.73434798827E-01
92.791032094       0.18608955294
44.055060255       0.33330981945
21.601319931       0.36229776246
10.732169233       0.17765186263
 2 p
100.88933962      -0.11146182144
36.640254741      -0.52324324314
 4 p
 8.0343224115     0.31484763263
 4.5613438333     0.38737744790
 3.1794882223     0.50034353638
0.92612041457     0.22656707948
 1 p
 1.7977040907     1.0000000000
 1 p
0.41386865432     1.0000000000
 1 p
0.15830798709     1.0000000000
 1 p
0.57877035911E-01 1.0000000000
 7 d
 420.99565921     0.78212192196E-03
126.36209818       0.69560123831E-02
48.661473548       0.33712188323E-01
20.880325527       0.10717291194
9.5418229355       0.23161030141
4.4353653868       0.33390954301
2.0285421942       0.33720676378
 1 d
0.89484935267     0.21702473265
 1 d
0.35786074334     1.0000000000
 1 d
0.14000000000     1.0000000000
 1 f
0.54920000000     1.0000000000
 1 f
0.21900000000     1.0000000000
 1 g
0.46810000000     1.0000000000
*
*
as def2-QZVP
# as      (24s20p10d2f1g) / [11s7p4d2f1g]      {(11)4111111111/(10)
511111/7111/11/1}
*
 11 s
 8217482.6198     0.70590618422E-05
1230500.3720     0.54880889611E-04

```

|                   |                    |
|-------------------|--------------------|
| 280225.86648      | 0.28809164698E-03  |
| 79482.509415      | 0.12129779464E-02  |
| 25963.783351      | 0.43914559880E-02  |
| 9381.4010193      | 0.14125362961E-01  |
| 3660.4911972      | 0.40657915618E-01  |
| 1518.2356024      | 0.10300382633      |
| 661.80098920      | 0.21730077101      |
| 300.58642127      | 0.33995751412      |
| 141.11137296      | 0.31088634077      |
| 4 s               |                    |
| 2577.0870580      | 0.70752991980E-02  |
| 798.07872277      | 0.71383615256E-01  |
| 306.57574948      | 0.34287024634      |
| 132.27558802      | 0.74361403413      |
| 1 s               |                    |
| 67.448702235      | 1.0000000000       |
| 1 s               |                    |
| 29.209180441      | 1.0000000000       |
| 1 s               |                    |
| 14.156509326      | 1.0000000000       |
| 1 s               |                    |
| 6.5561506682      | 1.0000000000       |
| 1 s               |                    |
| 3.1392847238      | 1.0000000000       |
| 1 s               |                    |
| 1.4294631050      | 1.0000000000       |
| 1 s               |                    |
| 0.41103390885     | 1.0000000000       |
| 1 s               |                    |
| 0.20032453310     | 1.0000000000       |
| 1 s               |                    |
| 0.85669928850E-01 | 1.0000000000       |
| 10 p              |                    |
| 25198.504278      | 0.54758168372E-04  |
| 5972.5601381      | 0.48572462452E-03  |
| 1941.9123183      | 0.27908085625E-02  |
| 743.59381104      | 0.12201505962E-01  |
| 315.63828052      | 0.42666285138E-01  |
| 143.96878925      | 0.11870919141      |
| 69.068683164      | 0.24909407023      |
| 34.254305629      | 0.36061356903      |
| 17.371746759      | 0.29392241832      |
| 8.7634555628      | 0.97829057366E-01  |
| 5 p               |                    |
| 228.49024582      | -0.24900140765E-02 |
| 86.313555488      | -0.19482515843E-01 |
| 36.751366267      | -0.61495071038E-01 |
| 8.5365149464      | 0.47258065062      |
| 4.1935128599      | 1.0236065079       |
| 1 p               |                    |
| 2.0464980417      | 1.0000000000       |
| 1 p               |                    |
| 0.98000000000     | 1.0000000000       |
| 1 p               |                    |
| 0.40534340618     | 1.0000000000       |
| 1 p               |                    |
| 0.16655070471     | 1.0000000000       |
| 1 p               |                    |
| 0.65981706123E-01 | 1.0000000000       |
| 7 d               |                    |

```

479.32599612      0.71722800196E-03
143.96064855      0.64419223046E-02
55.548909224      0.31776498964E-01
23.927581006      0.10276249168
10.988194172      0.22710952843
5.1489356262      0.33477474118
2.3836810892      0.34175986071
  1 d
1.0688204667      0.21462891644
  1 d
0.43305693742      1.0000000000
  1 d
0.17000000000      1.0000000000
  1 f
0.26400000000      1.0000000000
  1 f
0.64400000000      1.0000000000
  1 g
0.54650000000      1.0000000000
*
*
se def2-QZVP
# se      (24s20p10d2f1g) / [11s7p4d2f1g]      {(11)4111111111/(10)
511111/7111/11/1}
*
  11 s
9520446.7743      0.63309690150E-05
1424984.0802      0.49267697990E-04
324127.57682      0.25920249744E-03
91774.876950      0.10943145743E-02
29932.725725      0.39706139067E-02
10804.617905      0.12801187916E-01
4214.0134779      0.36980379417E-01
1747.8116633      0.94461349896E-01
762.12160878      0.20274705434
346.45604141      0.32878956424
163.11569304      0.32300252609
  4 s
2614.5153067      0.79113928518E-02
818.68552756      0.77187739408E-01
318.63398991      0.35672061949
139.04844125      0.75846750004
  1 s
78.348734788      1.0000000000
  1 s
31.704290663      1.0000000000
  1 s
15.505859269      1.0000000000
  1 s
7.3227423625      1.0000000000
  1 s
3.4969483549      1.0000000000
  1 s
1.6121546085      1.0000000000
  1 s
0.49587158541      1.0000000000
  1 s
0.24092138175      1.0000000000
  1 s
0.10231739397      1.0000000000

```

```

10 p
25360.215615      0.60531790911E-04
5993.7896610     0.53987774437E-03
1943.0741755     0.31130456170E-02
742.35316156    0.13599674694E-01
314.62114597    0.47298958377E-01
143.34748044    0.12981487726
68.673617552    0.26569982215
34.013554117    0.36723195311
17.198099621    0.27478356345
8.5830329629    0.79256169683E-01
 5 p
236.58209146    -0.12271649354E-02
90.576183214    -0.92584627774E-02
39.086689301    -0.28428728384E-01
9.3084344018    0.21201102192
4.6169923084    0.47117589805
 1 p
2.2653477506    1.0000000000
 1 p
1.0800000000    1.0000000000
 1 p
0.47939328581   1.0000000000
 1 p
0.19619983845   1.0000000000
 1 p
0.76256339275E-01 1.0000000000
 7 d
539.48700124    0.66722955533E-03
162.13394435    0.60399330928E-02
62.661795641    0.30238666507E-01
27.077272889    0.99267892065E-01
12.483003929    0.22358036310
5.8864623136    0.33574682762
2.7519131105    0.34554856483
 1 d
1.2500769617    0.21216654622
 1 d
0.51172841843   1.0000000000
 1 d
0.2000000000    1.0000000000
 1 f
0.2840000000    1.0000000000
 1 f
0.7097000000    1.0000000000
 1 g
0.5730000000    1.0000000000
*
*
br def2-QZVP
# br      (24s20p10d2f1g) / [11s7p4d2f1g]      {(11)4111111111/(10)
511111/7111/11/1}
*
11 s
10629044.264    0.59322104325E-05
1591918.2739    0.46118980689E-04
362333.98437    0.24244612378E-03
102643.11141    0.10231422748E-02
33489.846668    0.37121984175E-02
12091.247190    0.11978107933E-01

```

|                   |                    |
|-------------------|--------------------|
| 4716.1908789      | 0.34682692842E-01  |
| 1956.1598080      | 0.89068331264E-01  |
| 853.08595848      | 0.19330124567      |
| 387.96633666      | 0.32071144956      |
| 182.85156613      | 0.32996797574      |
| 4 s               |                    |
| 3240.4086421      | 0.65905194070E-02  |
| 1000.4631935      | 0.68439609656E-01  |
| 383.37301682      | 0.34495478668      |
| 166.03929698      | 0.82315542085      |
| 1 s               |                    |
| 87.919906994      | 1.0000000000       |
| 1 s               |                    |
| 35.675840068      | 1.0000000000       |
| 1 s               |                    |
| 17.543657842      | 1.0000000000       |
| 1 s               |                    |
| 8.4473660433      | 1.0000000000       |
| 1 s               |                    |
| 3.9666180616      | 1.0000000000       |
| 1 s               |                    |
| 1.8356815987      | 1.0000000000       |
| 1 s               |                    |
| 0.59084778776     | 1.0000000000       |
| 1 s               |                    |
| 0.28863218421     | 1.0000000000       |
| 1 s               |                    |
| 0.12153380537     | 1.0000000000       |
| 10 p              |                    |
| 26566.476579      | 0.62073657410E-04  |
| 6290.5088566      | 0.55131636217E-03  |
| 2043.3178410      | 0.31680110980E-02  |
| 781.67221007      | 0.13816597290E-01  |
| 331.51078945      | 0.48018539681E-01  |
| 151.09198667      | 0.13162015183      |
| 72.395278166      | 0.26860052203      |
| 35.869510844      | 0.36827391093      |
| 18.139906191      | 0.27108612944      |
| 9.0466688944      | 0.76215338633E-01  |
| 5 p               |                    |
| 253.71822146      | -0.13729169381E-02 |
| 97.250818058      | -0.10393811185E-01 |
| 42.034897960      | -0.32204214612E-01 |
| 9.9685673555      | 0.24224770086      |
| 4.9395854745      | 0.53557868398      |
| 1 p               |                    |
| 2.4382845475      | 1.0000000000       |
| 1 p               |                    |
| 1.1800000000      | 1.0000000000       |
| 1 p               |                    |
| 0.51047564965     | 1.0000000000       |
| 1 p               |                    |
| 0.21215851928     | 1.0000000000       |
| 1 p               |                    |
| 0.83943604990E-01 | 1.0000000000       |
| 7 d               |                    |
| 601.44434484      | 0.62783723765E-03  |
| 180.85718640      | 0.57205157153E-02  |
| 69.986806340      | 0.29002521527E-01  |
| 30.324710300      | 0.96446989766E-01  |

|                                      |                       |
|--------------------------------------|-----------------------|
| 14.027909238                         | 0.22065825870         |
| 6.6511702082                         | 0.33657642375         |
| 3.1354168338                         | 0.34872040582         |
| 1 d                                  |                       |
| 1.4393591843                         | 0.20984536473         |
| 1 d                                  |                       |
| 0.59350441438                        | 1.0000000000          |
| 1 d                                  |                       |
| 0.23000000000                        | 1.0000000000          |
| 1 f                                  |                       |
| 0.34070000000                        | 1.0000000000          |
| 1 f                                  |                       |
| 0.82570000000                        | 1.0000000000          |
| 1 g                                  |                       |
| 0.64910000000                        | 1.0000000000          |
| *                                    |                       |
| *                                    |                       |
| kr def2-QZVP                         |                       |
| # kr (24s20p10d2f1g) / [11s7p4d2f1g] | {(11)4111111111/(10)} |
| 511111/7111/11/1}                    |                       |
| *                                    |                       |
| 11 s                                 |                       |
| 11713823.008                         | 0.56915790360E-05     |
| 1755253.3979                         | 0.44214471278E-04     |
| 399717.41924                         | 0.23227813842E-03     |
| 113285.79260                         | 0.97973661050E-03     |
| 36977.205293                         | 0.35537627541E-02     |
| 13355.036580                         | 0.11468673282E-01     |
| 5210.9012988                         | 0.33241627469E-01     |
| 2162.1137020                         | 0.85620725674E-01     |
| 943.29291023                         | 0.18708766876         |
| 429.20724331                         | 0.31497583326         |
| 202.40720840                         | 0.33406191042         |
| 4 s                                  |                       |
| 3260.4985521                         | 0.73091509287E-02     |
| 1011.1069716                         | 0.74040355445E-01     |
| 392.44359273                         | 0.35414962222         |
| 173.21702132                         | 0.80188286115         |
| 1 s                                  |                       |
| 96.619988467                         | 1.0000000000          |
| 1 s                                  |                       |
| 38.158284867                         | 1.0000000000          |
| 1 s                                  |                       |
| 18.959517570                         | 1.0000000000          |
| 1 s                                  |                       |
| 9.2505996199                         | 1.0000000000          |
| 1 s                                  |                       |
| 4.3486517621                         | 1.0000000000          |
| 1 s                                  |                       |
| 2.0380324209                         | 1.0000000000          |
| 1 s                                  |                       |
| 0.69110152540                        | 1.0000000000          |
| 1 s                                  |                       |
| 0.33506065143                        | 1.0000000000          |
| 1 s                                  |                       |
| 0.14074441124                        | 1.0000000000          |
| 10 p                                 |                       |
| 28609.335767                         | 0.60526369543E-04     |
| 6773.1236364                         | 0.53786288403E-03     |
| 2199.8011079                         | 0.30935356550E-02     |



|                                                     |                    |
|-----------------------------------------------------|--------------------|
| 841.50201590                                        | 0.13514318412E-01  |
| 356.92110288                                        | 0.47090086910E-01  |
| 162.71174351                                        | 0.12960370449      |
| 78.004264994                                        | 0.26607435646      |
| 38.682579997                                        | 0.36775851233      |
| 19.589158685                                        | 0.27406903542      |
| 9.7990863417                                        | 0.78773352304E-01  |
| 5 p                                                 |                    |
| 261.37786869                                        | -0.16397212361E-02 |
| 100.09932146                                        | -0.12034797573E-01 |
| 44.012139363                                        | -0.34891485263E-01 |
| 10.854010739                                        | 0.25212650561      |
| 5.4351930182                                        | 0.57400781830      |
| 1 p                                                 |                    |
| 2.7062805542                                        | 1.0000000000       |
| 1 p                                                 |                    |
| 1.3195633408                                        | 1.0000000000       |
| 1 p                                                 |                    |
| 0.58004455967                                       | 1.0000000000       |
| 1 p                                                 |                    |
| 0.24329976264                                       | 1.0000000000       |
| 1 p                                                 |                    |
| 0.96823725087E-01                                   | 1.0000000000       |
| 7 d                                                 |                    |
| 665.35057386                                        | 0.59588702935E-03  |
| 200.17995366                                        | 0.54594260457E-02  |
| 77.545085570                                        | 0.27980992479E-01  |
| 33.677854345                                        | 0.94119165910E-01  |
| 15.624928334                                        | 0.21825215619      |
| 7.4427867423                                        | 0.33739971242      |
| 3.5336073535                                        | 0.35141418853      |
| 1 d                                                 |                    |
| 1.6363725142                                        | 0.20756718931      |
| 1 d                                                 |                    |
| 0.67845684728                                       | 1.0000000000       |
| 1 d                                                 |                    |
| 0.27000000000                                       | 1.0000000000       |
| 1 f                                                 |                    |
| 0.41300000000                                       | 1.0000000000       |
| 1 f                                                 |                    |
| 0.95570000000                                       | 1.0000000000       |
| 1 g                                                 |                    |
| 0.73950000000                                       | 1.0000000000       |
| *                                                   |                    |
| *                                                   |                    |
| rb def2-QZVP                                        |                    |
| # rb (8s8p5d1f) / [7s5p4d1f] {2111111/41111/2111/1} |                    |
| *                                                   |                    |
| 2 s                                                 |                    |
| 7.4744618040                                        | 0.26999390986      |
| 6.7296180594                                        | -0.42624989529     |
| 1 s                                                 |                    |
| 2.7822883445                                        | 1.0000000000       |
| 1 s                                                 |                    |
| 0.53494544647                                       | 1.0000000000       |
| 1 s                                                 |                    |
| 0.22522959349                                       | 1.0000000000       |
| 1 s                                                 |                    |
| 0.50765580412E-01                                   | 1.0000000000       |
| 1 s                                                 |                    |

```

0.26940281781E-01  1.0000000000
  1 s
0.13051395489E-01  1.0000000000
  4 p
  5.9998960731      0.54568549670E-01
  3.2040784712      -0.26447792498
0.86991979950      0.50033505958
0.44104169728      0.75243449327
  1 p
0.22139898232      1.0000000000
  1 p
0.10679039696      1.0000000000
  1 p
0.33292658822E-01  1.0000000000
  1 p
0.12847003750E-01  1.0000000000
  2 d
  4.6530655240      -0.11653388661E-02
0.44914033653      0.15584297068
  1 d
0.10089577190      0.48262396029
  1 d
0.27432280711E-01  1.0000000000
  1 d
0.95353625581E-02  1.0000000000
  1 f
0.85245000000      0.00000000000
*
rb def2-ecp
*
  ncore =      28          lmax =      3
#      coefficient      r^n          exponent
f
      -12.3169000      2          3.8431140
s-f
      89.5001980      2          5.0365510
      0.4937610      2          1.9708490
      12.3169000      2          3.8431140
p-f
      58.5689740      2          4.2583410
      0.4317910      2          1.4707090
      12.3169000      2          3.8431140
d-f
      26.2248980      2          3.0231270
      0.9628390      2          0.6503830
      12.3169000      2          3.8431140
*
*
sr def2-QZVP
# sr      (8s8p5d1f) / [7s5p4d1f]      {2111111/41111/2111/1}
*
  2 s
  11.000000000      -0.26157031021
  9.90000000000      0.36446668395
  1 s
  2.8771178206      1.0000000000
  1 s
0.63364987829      1.0000000000
  1 s
0.28588739731      1.0000000000

```

```

1 s
0.61938540840E-01 1.0000000000
1 s
0.31237518881E-01 1.0000000000
1 s
0.16266139051E-01 1.0000000000
4 p
7.6233499793 0.71548409039E-01
3.6643075442 -0.44232262175
0.97809648234 0.55690782709
0.77815253363 0.63437348922
1 p
0.40666316828 1.0000000000
1 p
0.18725455934 1.0000000000
1 p
0.56304594427E-01 1.0000000000
1 p
0.21826701680E-01 1.0000000000
2 d
4.3003648126 -0.43567751655E-02
0.84876551534 0.13176477946
1 d
0.29200562252 0.27410245307
1 d
0.94733990946E-01 1.0000000000
1 d
0.30479894317E-01 1.0000000000
1 f
0.99540000000 0.0000000000
*
sr def2-ecp
*
ncore = 28 lmax = 3
# coefficient r^n exponent
f -15.8059920 2 4.6339750
s-f 135.4794300 2 7.4000740
17.5344630 2 3.6063790
15.8059920 2 4.6339750
p-f 88.3597090 2 6.4848680
15.3943720 2 3.2880530
15.8059920 2 4.6339750
d-f 29.8889870 2 4.6228410
6.6594140 2 2.2469040
15.8059920 2 4.6339750
*
*
y def2-QZVP
# y (8s8p7d3f1g) / [7s5p4d3f1g] {2111111/41111/4111/111/1}
*
2 s
12.000000000 -0.27445870024
10.800000000 0.37995468727
1 s
3.1007372195 1.0000000000
1 s

```

|                   |                    |
|-------------------|--------------------|
| 0.74155427570     | 1.0000000000       |
| 1 s               |                    |
| 0.34176775775     | 1.0000000000       |
| 1 s               |                    |
| 0.79428797018E-01 | 1.0000000000       |
| 1 s               |                    |
| 0.43308336524E-01 | 1.0000000000       |
| 1 s               |                    |
| 0.21593224872E-01 | 1.0000000000       |
| 4 p               |                    |
| 8.0336135138      | 0.73041700172E-01  |
| 4.0181723477      | -0.41610436192     |
| 1.1052105890      | 0.55451897342      |
| 0.83219316692     | 0.62307196069      |
| 1 p               |                    |
| 0.44762676666     | 1.0000000000       |
| 1 p               |                    |
| 0.20523347112     | 1.0000000000       |
| 1 p               |                    |
| 0.55045561759E-01 | 1.0000000000       |
| 1 p               |                    |
| 0.22603027453E-01 | 1.0000000000       |
| 4 d               |                    |
| 13.755105347      | 0.23830583863E-02  |
| 3.9629908552      | -0.25068021047E-01 |
| 1.3427449755      | 0.22348991872      |
| 0.62579248108     | 0.55237929771      |
| 1 d               |                    |
| 0.27632363958     | 1.0000000000       |
| 1 d               |                    |
| 0.11706987754     | 1.0000000000       |
| 1 d               |                    |
| 0.46601501035E-01 | 1.0000000000       |
| 1 f               |                    |
| 0.76291000000     | 1.0000000000       |
| 1 f               |                    |
| 0.26515000000     | 1.0000000000       |
| 1 f               |                    |
| 0.92150000000E-01 | 1.0000000000       |
| 1 g               |                    |
| 0.11149000000     | 1.0000000000       |

\*

y def2-ecp

\*

| #   | ncore = 28  | lmax = 3 | exponent  |
|-----|-------------|----------|-----------|
| f   | coefficient | r^n      |           |
|     | -19.1221981 | 2        | 6.5842120 |
|     | -2.4363754  | 2        | 3.2921060 |
| s-f | 135.1538441 | 2        | 7.4880494 |
|     | 15.5524413  | 2        | 3.7440247 |
|     | 19.1221981  | 2        | 6.5842120 |
|     | 2.4363754   | 2        | 3.2921060 |
| p-f | 87.7849917  | 2        | 6.4453772 |
|     | 11.5640660  | 2        | 3.2226886 |
|     | 19.1221981  | 2        | 6.5842120 |
|     | 2.4363754   | 2        | 3.2921060 |
| d-f |             |          |           |

|            |   |           |
|------------|---|-----------|
| 29.7010007 | 2 | 4.6584472 |
| 5.5399685  | 2 | 2.3292236 |
| 19.1221981 | 2 | 6.5842120 |
| 2.4363754  | 2 | 3.2921060 |

\*  
\*

zr def2-QZVP

# zr (8s8p7d3f1g) / [7s5p4d3f1g] {2111111/41111/4111/111/1}

\*

|                   |                    |  |
|-------------------|--------------------|--|
| 2 s               |                    |  |
| 13.000000000      | 0.30219052022      |  |
| 11.750000000      | -0.41145056914     |  |
| 1 s               |                    |  |
| 3.3679085035      | 1.0000000000       |  |
| 1 s               |                    |  |
| 0.83813257389     | 1.0000000000       |  |
| 1 s               |                    |  |
| 0.39094081796     | 1.0000000000       |  |
| 1 s               |                    |  |
| 0.12165103956     | 1.0000000000       |  |
| 1 s               |                    |  |
| 0.68995924030E-01 | 1.0000000000       |  |
| 1 s               |                    |  |
| 0.28131941438E-01 | 1.0000000000       |  |
| 4 p               |                    |  |
| 8.6639962104      | 0.73773984271E-01  |  |
| 4.4109566148      | -0.40022747074     |  |
| 1.2360133871      | 0.54947233625      |  |
| 0.87445820593     | 0.61937721413      |  |
| 1 p               |                    |  |
| 0.47713887642     | 1.0000000000       |  |
| 1 p               |                    |  |
| 0.21764845261     | 1.0000000000       |  |
| 1 p               |                    |  |
| 0.57837163627E-01 | 1.0000000000       |  |
| 1 p               |                    |  |
| 0.20242456645E-01 | 1.0000000000       |  |
| 4 d               |                    |  |
| 14.106535710      | 0.29285547494E-02  |  |
| 5.0597471810      | -0.19680100129E-01 |  |
| 1.4340490314      | 0.24763912308      |  |
| 0.65933129072     | 0.53572735030      |  |
| 1 d               |                    |  |
| 0.28894952351     | 1.0000000000       |  |
| 1 d               |                    |  |
| 0.12160731860     | 1.0000000000       |  |
| 1 d               |                    |  |
| 0.48470078407E-01 | 1.0000000000       |  |
| 1 f               |                    |  |
| 1.1417100000      | 1.0000000000       |  |
| 1 f               |                    |  |
| 0.3926100000      | 1.0000000000       |  |
| 1 f               |                    |  |
| 0.1350100000      | 1.0000000000       |  |
| 1 g               |                    |  |
| 0.28989000000     | 1.0000000000       |  |

\*

zr def2-ecp

\*

ncore = 28 lmax = 3

| #            | coefficient                 | r^n                | exponent                    |
|--------------|-----------------------------|--------------------|-----------------------------|
| f            | -21.0937760                 | 2                  | 7.5400000                   |
|              | -3.0806943                  | 2                  | 3.7700000                   |
| s-f          | 150.2675911                 | 2                  | 8.2000000                   |
|              | 18.9762165                  | 2                  | 4.0897278                   |
|              | 21.0937760                  | 2                  | 7.5400000                   |
|              | 3.0806943                   | 2                  | 3.7700000                   |
| p-f          | 99.6221237                  | 2                  | 7.1100000                   |
|              | 14.1687333                  | 2                  | 3.5967980                   |
|              | 21.0937760                  | 2                  | 7.5400000                   |
|              | 3.0806943                   | 2                  | 3.7700000                   |
| d-f          | 35.0451235                  | 2                  | 5.3500000                   |
|              | 6.1112595                   | 2                  | 2.4918215                   |
|              | 21.0937760                  | 2                  | 7.5400000                   |
|              | 3.0806943                   | 2                  | 3.7700000                   |
| *            |                             |                    |                             |
| *            |                             |                    |                             |
| nb def2-QZVP |                             |                    |                             |
| # nb         | (8s8p7d3f1g) / [7s5p4d3f1g] |                    | {21111111/41111/4111/111/1} |
| *            |                             |                    |                             |
| 2 s          | 13.500000000                | -0.32410606901     |                             |
|              | 12.200000000                | 0.44773333772      |                             |
| 1 s          | 3.7169274051                | 1.0000000000       |                             |
| 1 s          | 0.90652488058               | 1.0000000000       |                             |
| 1 s          | 0.41577606051               | 1.0000000000       |                             |
| 1 s          | 0.11042511303               | 1.0000000000       |                             |
| 1 s          | 0.62821821279E-01           | 1.0000000000       |                             |
| 1 s          | 0.28016289999E-01           | 1.0000000000       |                             |
| 4 p          | 9.3098091725                | 0.73705483583E-01  |                             |
|              | 4.8178682975                | -0.38234456657     |                             |
|              | 1.3632838380                | 0.54987821838      |                             |
|              | 0.90647526151               | 0.61931035808      |                             |
| 1 p          | 0.50089563075               | 1.0000000000       |                             |
| 1 p          | 0.22793279437               | 1.0000000000       |                             |
| 1 p          | 0.60000000000E-01           | 1.0000000000       |                             |
| 1 p          | 0.20600000000E-01           | 1.0000000000       |                             |
| 4 d          | 17.364404474                | 0.26413526976E-02  |                             |
|              | 5.3680385855                | -0.20806369564E-01 |                             |
|              | 1.6586089067                | 0.24555637053      |                             |
|              | 0.78121461396               | 0.53651499644      |                             |
| 1 d          | 0.34874234803               | 1.0000000000       |                             |
| 1 d          |                             |                    |                             |

```

0.14844540532      1.0000000000
  1 d
0.59334919015E-01  1.0000000000
  1 f
1.5360500000      1.0000000000
  1 f
0.5227000000      1.0000000000
  1 f
0.1778700000      1.0000000000
  1 g
0.4682900000      1.0000000000
*
nb def2-ecp
*
  ncore =      28      lmax =      3
#      coefficient  r^n      exponent
f      -22.9295500   2      8.4900000
      -3.6663099   2      4.2500000
s-f    165.1791435   2      8.9000000
      21.9929744   2      4.4300000
      22.9295500   2      8.4900000
      3.6663099   2      4.2500000
p-f    111.7944145   2      7.7700000
      16.6334833   2      3.9600000
      22.9295500   2      8.4900000
      3.6663099   2      4.2500000
d-f    38.1122488   2      6.0500000
      8.0391673   2      2.8400000
      22.9295500   2      8.4900000
      3.6663099   2      4.2500000
*
*
mo def2-QZVP
# mo      (9s8p7d3f1g) / [7s5p4d3f1g]      {3111111/41111/4111/111/1}
*
  3 s
15.000000000      0.57082903143E-01
13.500000000      -0.66824799324
12.571764111      0.75521146249
  1 s
4.1304342348      1.0000000000
  1 s
0.96478113331      1.0000000000
  1 s
0.43736648981      1.0000000000
  1 s
0.11318605514      1.0000000000
  1 s
0.57579423658E-01  1.0000000000
  1 s
0.27018151462E-01  1.0000000000
  4 p
9.1087343439      0.10192125262
5.3495476626      -0.38460279534
1.4870196599      0.53457134734
0.90585473836      0.61724117143

```

```

1 p
0.50141240214      1.0000000000
1 p
0.23286318145      1.0000000000
1 p
0.620000000000E-01  1.0000000000
1 p
0.210000000000E-01  1.0000000000
4 d
17.215377137      0.30147475909E-02
5.8496916871      -0.28923836319E-01
1.8232967249      0.25398642015
0.86970233105      0.52725603860
1 d
0.39461697588      1.0000000000
1 d
0.17084141240      1.0000000000
1 d
0.69272819629E-01  1.0000000000
1 f
1.9462500000      1.0000000000
1 f
0.65545000000      1.0000000000
1 f
0.22074000000      1.0000000000
1 g
0.64670000000      1.0000000000
*
mo def2-ecp
*
ncore = 28          lmax = 3
# coefficient      r^n      exponent
f
-24.8051771      2          9.4500000
-4.1537815      2          4.7200000
s-f
180.1031085      2          9.7145938
24.9972279      2          4.6805004
24.8051771      2          9.4500000
4.1537815      2          4.7200000
p-f
123.7727523      2          8.1421366
19.5302280      2          4.6259863
24.8051771      2          9.4500000
4.1537815      2          4.7200000
d-f
48.3750223      2          6.6184148
8.8920527      2          3.2487516
24.8051771      2          9.4500000
4.1537815      2          4.7200000
*
*
tc def2-QZVP
# tc      (9s8p7d3f1g) / [7s5p4d3f1g]      {3111111/41111/4111/111/1}
*
3 s
15.000000000      -0.31349221639
13.500000000      0.44793618799
7.1022525122      0.20051786822E-01
1 s

```



|                   |                    |
|-------------------|--------------------|
| 4.4415995038      | 1.0000000000       |
| 1 s               |                    |
| 1.0660127848      | 1.0000000000       |
| 1 s               |                    |
| 0.48568559673     | 1.0000000000       |
| 1 s               |                    |
| 0.12654965451     | 1.0000000000       |
| 1 s               |                    |
| 0.66997954399E-01 | 1.0000000000       |
| 1 s               |                    |
| 0.29822104753E-01 | 1.0000000000       |
| 4 p               |                    |
| 10.298029968      | 0.83867175334E-01  |
| 5.7213792785      | -0.36246957884     |
| 1.6296063991      | 0.53649463822      |
| 0.97528623230     | 0.61837212480      |
| 1 p               |                    |
| 0.53997625690     | 1.0000000000       |
| 1 p               |                    |
| 0.25172025379     | 1.0000000000       |
| 1 p               |                    |
| 0.64000000000E-01 | 1.0000000000       |
| 1 p               |                    |
| 0.21500000000E-01 | 1.0000000000       |
| 4 d               |                    |
| 18.617708386      | 0.27056783609E-02  |
| 5.8369803972      | -0.35968645824E-01 |
| 2.0921979438      | 0.21334851537      |
| 1.0148117201      | 0.45713971996      |
| 1 d               |                    |
| 0.46154215497     | 1.0000000000       |
| 1 d               |                    |
| 0.19795071041     | 1.0000000000       |
| 1 d               |                    |
| 0.78619872304E-01 | 1.0000000000       |
| 1 f               |                    |
| 2.3724000000      | 1.0000000000       |
| 1 f               |                    |
| 0.79080000000     | 1.0000000000       |
| 1 f               |                    |
| 0.26360000000     | 1.0000000000       |
| 1 g               |                    |
| 0.82510000000     | 1.0000000000       |

\*

tc def2-ecp

\*

| #   | ncore = 28 | coefficient | r^n | lmax = 3 | exponent   |
|-----|------------|-------------|-----|----------|------------|
| f   |            | -26.5624475 | 2   |          | 10.4000000 |
|     |            | -4.5856805  | 2   |          | 5.2000000  |
| s-f |            | 195.1591659 | 2   |          | 10.4223462 |
|     |            | 28.0926033  | 2   |          | 5.0365160  |
|     |            | 26.5624475  | 2   |          | 10.4000000 |
|     |            | 4.5856805   | 2   |          | 5.2000000  |
| p-f |            | 135.2845662 | 2   |          | 8.9504494  |
|     |            | 21.8065043  | 2   |          | 4.8544394  |
|     |            | 26.5624475  | 2   |          | 10.4000000 |

```

          4.5856805      2          5.2000000
d-f      54.3297294      2          6.9456968
          11.1550679      2          3.9705849
          26.5624475      2         10.4000000
          4.5856805      2          5.2000000
*
*
ru def2-QZVP
# ru      (9s8p7d3f1g) / [7s5p4d3f1g]      {3111111/41111/4111/111/1}
*
      3 s
      15.000000000      0.40205707045
      13.500000000     -0.59417167365
      7.2130868530      0.12541032854
      1 s
      4.5405901225      1.00000000000
      1 s
      1.1904973723      1.00000000000
      1 s
      0.54307531590      1.00000000000
      1 s
      0.13700563039      1.00000000000
      1 s
      0.73396375028E-01  1.00000000000
      1 s
      0.31250715458E-01  1.00000000000
      4 p
      11.388100061      0.55871461629E-01
      6.1591005666     -0.25808446847
      1.7320431063      0.42924265341
      1.0194857402      0.43313353048
      1 p
      0.58131419111      1.00000000000
      1 p
      0.27290530268      1.00000000000
      1 p
      0.66000000000E-01  1.00000000000
      1 p
      0.22000000000E-01  1.00000000000
      4 d
      18.598247778      0.31556859652E-02
      6.7883773752     -0.34551060293E-01
      2.2470797667      0.217085666158
      1.0884195428      0.42834135307
      1 d
      0.49787892886      1.00000000000
      1 d
      0.21481968266      1.00000000000
      1 d
      0.85666751170E-01  1.00000000000
      1 f
      2.8246600000      1.00000000000
      1 f
      0.94314000000      1.00000000000
      1 f
      0.31491000000      1.00000000000
      1 g
      1.00930000000      1.00000000000
*

```

ru def2-ecp

```
*
# ncore = 28          lmax = 3
# coefficient      r^n      exponent
f      -28.3406163    2          11.3600000
      -4.9446292     2          5.6800000
s-f    209.8229712    2          11.1052693
      30.6547264     2          5.4147454
      28.3406163     2          11.3600000
      4.9446292     2          5.6800000
p-f    146.3361823    2          9.7712707
      24.1278772     2          5.0739908
      28.3406163     2          11.3600000
      4.9446292     2          5.6800000
d-f    67.5158967     2          7.6714231
      9.8701041     2          4.1365647
      28.3406163     2          11.3600000
      4.9446292     2          5.6800000
```

\*  
\*

rh def2-QZVP

```
# rh      (9s8p7d3f1g) / [7s5p4d3f1g]      {31111111/41111/4111/111/1}
```

\*

```
3 s
15.000000000    0.50258059140
13.500000000    -0.76433277918
7.4051116103   0.31145290674
1 s
4.5131696431   1.00000000000
1 s
1.3235977422   1.00000000000
1 s
0.60954144541   1.00000000000
1 s
0.18907192773   1.00000000000
1 s
0.89080450794E-01  1.00000000000
1 s
0.34131567514E-01  1.00000000000
4 p
11.839425278    0.59787418531E-01
6.6953652636    -0.24743454054
1.8333616287    0.42987003231
1.0267931770    0.42547313311
1 p
0.58071767020    1.00000000000
1 p
0.27907753269    1.00000000000
1 p
0.67108954625E-01  1.00000000000
1 p
0.22101542156E-01  1.00000000000
4 d
26.341167176    0.20623159685E-02
7.8709462705    -0.17239329053E-01
2.5989970939    0.17284839402
```

```

1.2613435752      0.36282102279
 1 d
0.57578407979    1.00000000000
 1 d
0.24725174897    1.00000000000
 1 d
0.97531210324E-01 1.00000000000
 1 f
 3.2739100000    1.00000000000
 1 f
 1.0949900000    1.00000000000
 1 f
0.36623000000    1.00000000000
 1 g
 1.1935000000    1.00000000000
*
rh def2-ecp
*
  ncore =      28      lmax =      3
#      coefficient  r^n      exponent
f
      -30.0934557    2      12.3100000
      -5.2184819    2      6.1600000
s-f
      225.3477535    2      11.7200000
      32.8231890    2      5.8200000
      30.0934557    2      12.3100000
      5.2184819    2      6.1600000
p-f
      158.7094116    2      10.4200000
      26.4441005    2      5.4500000
      30.0934557    2      12.3100000
      5.2184819    2      6.1600000
d-f
      62.7586257    2      8.8200000
      10.9787195    2      3.8700000
      30.0934557    2      12.3100000
      5.2184819    2      6.1600000
*
*
pd def2-QZVP
# pd      (9s8p7d3f1g) / [7s5p4d3f1g]      {3111111/41111/4111/111/1}
*
  3 s
15.262399331      0.44145727454
13.721983176      -0.70293005979
 4.8448286268      0.36095390108
 1 s
 8.7309326588      1.00000000000
 1 s
 1.4357564094      1.00000000000
 1 s
0.66088433720      1.00000000000
 1 s
0.20897212790      1.00000000000
 1 s
0.91936735872E-01 1.00000000000
 1 s
0.34733479706E-01 1.00000000000
 4 p

```

```

12.585237008      0.60002003747E-01
7.2058104839     -0.24022183118
1.9558705640      0.43424940067
1.0534418618      0.42084436088
  1 p
0.59809389552      1.00000000000
  1 p
0.30362411297      1.00000000000
  1 p
0.880000000000E-01  1.00000000000
  1 p
0.300000000000E-01  1.00000000000
  4 d
28.840985892      0.21131470308E-02
8.4584163440     -0.17913194955E-01
2.8648941754      0.17165507663
1.3966488847      0.36149251150
  1 d
0.63921677230      1.00000000000
  1 d
0.27502319836      1.00000000000
  1 d
0.10829940074      1.00000000000
  1 f
3.72000000000      1.00000000000
  1 f
1.24629000000      1.00000000000
  1 f
0.41754000000      1.00000000000
  1 g
1.37770000000      1.00000000000
*
pd def2-ecp
*
  ncore =      28          lmax =      3
# coefficient  r^n      exponent
f
  -31.9295543    2      13.2700000
  -5.3982169    2      6.6300000
s-f
  240.2290403    2      12.4300000
  35.1719435    2      6.1707594
  31.9295543    2      13.2700000
  5.3982169    2      6.6300000
p-f
  170.4172760    2      11.0800000
  28.4721329    2      5.8295541
  31.9295543    2      13.2700000
  5.3982169    2      6.6300000
d-f
  69.0138449    2      9.5100000
  11.7508616    2      4.1397811
  31.9295543    2      13.2700000
  5.3982169    2      6.6300000
*
*
ag def2-QZVP
# ag (10s8p7d3f1g) / [7s5p4d3f1g] {4111111/41111/4111/111/1}
*
  4 s

```

|                   |                    |
|-------------------|--------------------|
| 256.50898381      | 0.73215128094E-03  |
| 19.000000000      | -0.14706983774     |
| 14.129749737      | 0.47914881797      |
| 9.4840599768      | -0.26930801705     |
| 1 s               |                    |
| 5.5812682897      | 1.0000000000       |
| 1 s               |                    |
| 1.4763753299      | 1.0000000000       |
| 1 s               |                    |
| 0.66184584335     | 1.0000000000       |
| 1 s               |                    |
| 0.15382171742     | 1.0000000000       |
| 1 s               |                    |
| 0.79534248689E-01 | 1.0000000000       |
| 1 s               |                    |
| 0.32408624506E-01 | 1.0000000000       |
| 4 p               |                    |
| 13.350389537      | 0.62479151672E-01  |
| 7.7163302467      | -0.24398688175     |
| 2.0864535219      | 0.45439758415      |
| 1.0577805733      | 0.47607485340      |
| 1 p               |                    |
| 0.52564427657     | 1.0000000000       |
| 1 p               |                    |
| 0.23694908895     | 1.0000000000       |
| 1 p               |                    |
| 0.66457980332E-01 | 1.0000000000       |
| 1 p               |                    |
| 0.21864839286E-01 | 1.0000000000       |
| 4 d               |                    |
| 32.147961274      | 0.34564677092E-02  |
| 9.0323725307      | -0.28135297216E-01 |
| 3.1673540854      | 0.26999486025      |
| 1.5519381135      | 0.57666767772      |
| 1 d               |                    |
| 0.71310284000     | 1.0000000000       |
| 1 d               |                    |
| 0.30749741551     | 1.0000000000       |
| 1 d               |                    |
| 0.12094304210     | 1.0000000000       |
| 1 f               |                    |
| 4.1631100000      | 1.0000000000       |
| 1 f               |                    |
| 1.3971100000      | 1.0000000000       |
| 1 f               |                    |
| 0.46886000000     | 1.0000000000       |
| 1 g               |                    |
| 1.5619000000      | 1.0000000000       |
| *                 |                    |
| ag def2-ecp       |                    |
| *                 |                    |
| ncore = 28        | lmax = 3           |
| # coefficient r^n | exponent           |
| f                 |                    |
| -33.6899201       | 2 14.2200000       |
| -5.5311202        | 2 7.1100000        |
| s-f               |                    |
| 255.1393645       | 2 13.1300000       |
| 36.8661215        | 2 6.5100000        |
| 33.6899201        | 2 14.2200000       |

|     |             |   |            |
|-----|-------------|---|------------|
|     | 5.5311202   | 2 | 7.1100000  |
| p-f | 182.1818687 | 2 | 11.7400000 |
|     | 30.3577515  | 2 | 6.2000000  |
|     | 33.6899201  | 2 | 14.2200000 |
|     | 5.5311202   | 2 | 7.1100000  |
| d-f | 73.7192609  | 2 | 10.2100000 |
|     | 12.5021171  | 2 | 4.3800000  |
|     | 33.6899201  | 2 | 14.2200000 |
|     | 5.5311202   | 2 | 7.1100000  |

\*  
\*

```
cd def2-QZVP
# cd (10s8p7d3f1g) / [7s5p4d3f1g] {4111111/41111/4111/111/1}
```

\*

```
4 s
269.30016289 0.62688949336E-03
18.554269093 -0.43456616075
16.729943183 0.66043072415
11.768546646 -0.11793513277
1 s
6.1816604427 1.0000000000
1 s
1.5775743989 1.0000000000
1 s
0.71857981187 1.0000000000
1 s
0.16433138409 1.0000000000
1 s
0.76794158768E-01 1.0000000000
1 s
0.34377199848E-01 1.0000000000
4 p
14.107678180 0.70307291426E-01
8.2750040714 -0.26474818030
2.2507338323 0.47494851120
1.1914970238 0.46327020832
1 p
0.66041257699 1.0000000000
1 p
0.33804403770 1.0000000000
1 p
0.96004037879E-01 1.0000000000
1 p
0.33681030012E-01 1.0000000000
4 d
35.689192548 0.44455913982E-02
9.3407971610 -0.39185351747E-01
3.5922659140 0.31235972097
1.7980676976 0.71163739606
1 d
0.84830057791 1.0000000000
1 d
0.37846492753 1.0000000000
1 d
0.15420101631 1.0000000000
1 f
4.7689900000 1.0000000000
1 f
```

```

1.5981300000      1.0000000000
 1 f
0.5355500000      1.0000000000
 1 g
1.7896000000      1.0000000000
*
cd def2-ecp
*
  ncore =    28      lmax =    3
#      coefficient   r^n      exponent
f
      -35.4766256    2      15.1847957
      -5.6176768    2      7.5923978
s-f
      270.0094832    2      13.8358689
      38.7673080     2      6.8572704
      35.4766256     2      15.1847957
      5.6176768      2      7.5923978
p-f
      193.8296294    2      12.4049710
      31.8965252     2      6.5677995
      35.4766256     2      15.1847957
      5.6176768      2      7.5923978
d-f
      79.1936470     2      10.8969253
      13.2308267     2      4.6411649
      35.4766256     2      15.1847957
      5.6176768      2      7.5923978
*
*
in def2-QZVP
# in      (17s14p11d4f1g) / [7s6p4d4f1g]      {9131111/731111/8111/1111/1}
*
  9 s
8931.8400000      0.190000000000E-04
1352.2200000      0.131000000000E-03
303.393000000     0.478000000000E-03
45.122900000     0.117080000000E-01
28.182200000     -0.873300000000E-01
17.604800000     0.259577000000
6.94058000000   -0.628471000000
4.33377000000   -0.158718000000
1.98684000000   0.674404000000
 1 s
1.0438672413     1.000000000000
 3 s
20.245544208     0.29650296199E-01
11.072298416    -0.14745372687
2.4929238916    0.53232061960
 1 s
0.532444484157     1.000000000000
 1 s
0.21211307407     1.000000000000
 1 s
0.95475196519E-01  1.000000000000
 1 s
0.42357644919E-01  1.000000000000
 7 p
129.23300000     0.279000000000E-03
29.628400000    -0.617100000000E-02

```



|                   |                    |
|-------------------|--------------------|
| 18.521100000      | 0.46912000000E-01  |
| 8.2853600000      | -0.23990400000     |
| 2.4993900000      | 0.42981100000      |
| 1.3221600000      | 0.48610100000      |
| 0.68870700000     | 0.22203700000      |
| 3 p               |                    |
| 13.248633034      | -0.18203004609E-01 |
| 3.0240161259      | 0.31476939453      |
| 1.0805448379      | 0.71919648136      |
| 1 p               |                    |
| 0.33353581509     | 1.0000000000       |
| 1 p               |                    |
| 0.15403760449     | 1.0000000000       |
| 1 p               |                    |
| 0.65770424632E-01 | 1.0000000000       |
| 1 p               |                    |
| 0.27642180293E-01 | 1.0000000000       |
| 8 d               |                    |
| 131.81131820      | 0.22281463414E-03  |
| 37.030875816      | 0.19331306797E-02  |
| 11.378665218      | -0.17870304080E-01 |
| 6.4488212086      | 0.22953424346E-01  |
| 3.4878752216      | 0.17536747821      |
| 1.9912337572      | 0.29288830616      |
| 1.1306610212      | 0.31018960851      |
| 0.63074842914     | 0.24247651565      |
| 1 d               |                    |
| 0.33856463907     | 1.0000000000       |
| 1 d               |                    |
| 0.17026198815     | 1.0000000000       |
| 1 d               |                    |
| 0.69200000000E-01 | 1.0000000000       |
| 1 f               |                    |
| 0.39210000000     | 1.0000000000       |
| 1 f               |                    |
| 0.15600000000     | 1.0000000000       |
| 1 f               |                    |
| 1.3983200000      | 1.0000000000       |
| 1 f               |                    |
| 4.1949600000      | 1.0000000000       |
| 1 g               |                    |
| 0.34190000000     | 1.0000000000       |

\*

in def2-ecp

\*

| #   | ncore = 28 | lmax = 3 | coefficient | r^n | exponent   |
|-----|------------|----------|-------------|-----|------------|
| f   |            |          | -13.7280780 | 2   | 12.5390560 |
|     |            |          | -18.2068660 | 2   | 12.5525610 |
| s-f |            |          | 281.1223500 | 2   | 15.3928220 |
|     |            |          | 61.9014700  | 2   | 8.0558640  |
|     |            |          | 13.7280780  | 2   | 12.5390560 |
|     |            |          | 18.2068660  | 2   | 12.5525610 |
| p-f |            |          | 67.4621540  | 2   | 13.9286720 |
|     |            |          | 134.9492500 | 2   | 13.3472340 |
|     |            |          | 14.7461400  | 2   | 7.6141320  |
|     |            |          | 29.6392620  | 2   | 7.3183650  |

|     |            |   |            |
|-----|------------|---|------------|
|     | 13.7280780 | 2 | 12.5390560 |
|     | 18.2068660 | 2 | 12.5525610 |
| d-f | 35.4932540 | 2 | 14.0347150 |
|     | 53.1787730 | 2 | 14.5116160 |
|     | 9.1772810  | 2 | 5.5505500  |
|     | 12.3924100 | 2 | 5.0594150  |
|     | 13.7280780 | 2 | 12.5390560 |
|     | 18.2068660 | 2 | 12.5525610 |

\*

\*

sn def2-QZVP

# sn (17s14p11d4f1g) / [7s6p4d4f1g] {9131111/731111/8111/1111/1}

\*

|                   |                     |  |
|-------------------|---------------------|--|
| 9 s               |                     |  |
| 11606.900000      | 0.290000000000E-04  |  |
| 1754.8000000      | 0.206000000000E-03  |  |
| 397.17800000      | 0.807000000000E-03  |  |
| 90.299000000      | 0.247100000000E-02  |  |
| 31.489000000      | -0.400250000000E-01 |  |
| 19.668500000      | 0.16315200000       |  |
| 7.0675900000      | -0.55698300000      |  |
| 4.4149000000      | -0.16993200000      |  |
| 2.1635600000      | 0.65102800000       |  |
| 1 s               |                     |  |
| 1.1440977736      | 1.0000000000        |  |
| 3 s               |                     |  |
| 20.197961274      | 0.22393937317E-01   |  |
| 10.880108426      | -0.14330764814      |  |
| 2.7745387028      | 0.53278527074       |  |
| 1 s               |                     |  |
| 0.58550056279     | 1.0000000000        |  |
| 1 s               |                     |  |
| 0.25317089836     | 1.0000000000        |  |
| 1 s               |                     |  |
| 0.11599461634     | 1.0000000000        |  |
| 1 s               |                     |  |
| 0.52233584109E-01 | 1.0000000000        |  |
| 7 p               |                     |  |
| 195.49500000      | 0.258000000000E-03  |  |
| 18.256300000      | 0.443410000000E-01  |  |
| 11.409400000      | -0.10914200000      |  |
| 6.9056700000      | -0.13860600000      |  |
| 2.9820600000      | 0.34374300000       |  |
| 1.6084300000      | 0.51827100000       |  |
| 0.83176700000     | 0.27870600000       |  |
| 3 p               |                     |  |
| 13.304065745      | -0.20694775410E-01  |  |
| 3.4193503621      | 0.33654593033       |  |
| 1.2382899573      | 0.71397757129       |  |
| 1 p               |                     |  |
| 0.39265300321     | 1.0000000000        |  |
| 1 p               |                     |  |
| 0.19313059747     | 1.0000000000        |  |
| 1 p               |                     |  |
| 0.86443518729E-01 | 1.0000000000        |  |
| 1 p               |                     |  |
| 0.37350684674E-01 | 1.0000000000        |  |
| 8 d               |                     |  |
| 143.82134199      | 0.26165602862E-03   |  |

```

41.039940764      0.21562117321E-02
11.508999207     -0.24771286642E-01
8.4312612820     0.29022163379E-01
4.0180001346     0.16171344601
2.3122021836     0.29213521578
1.3168562511     0.32241037254
0.73729126651    0.24629433031
  1 d
0.40109472811    1.00000000000
  1 d
0.20593354535    1.00000000000
  1 d
0.86600000000E-01 1.00000000000
  1 f
0.43150000000    1.00000000000
  1 f
0.17720000000    1.00000000000
  1 f
1.59154000000    1.00000000000
  1 f
4.7988893935     1.00000000000
  1 g
0.37740000000    1.00000000000
*
sn def2-ecp
*
  ncore =    28      lmax =    3
#      coefficient  r^n      exponent
f
      -12.5763330   2        12.2823480
      -16.5959440   2        12.2721500
s-f
      279.9886820   2        17.4204140
      62.3778100   2        7.6311550
      12.5763330   2        12.2823480
      16.5959440   2        12.2721500
p-f
      66.1625230   2        16.1310240
      132.1743960   2        15.6280770
      16.3394170   2        7.3256080
      32.4889590   2        6.9425190
      12.5763330   2        12.2823480
      16.5959440   2        12.2721500
d-f
      36.3874410   2        15.5149760
      54.5078410   2        15.1881600
      8.6968230    2        5.4560240
      12.8402080   2        5.3631050
      12.5763330   2        12.2823480
      16.5959440   2        12.2721500
*
*
sb def2-QZVP
# sb      (17s14p11d4f1g) / [7s6p4d4f1g]      {9131111/731111/8111/1111/1}
*
  9 s
12339.316555     0.38545231046E-04
1854.7043271     0.27702166404E-03
418.44441772     0.11161923778E-02
96.965111109     0.28828055377E-02

```

|                   |                    |
|-------------------|--------------------|
| 28.537960267      | -0.60556405021E-01 |
| 17.862907144      | 0.27988835315      |
| 8.4541754812      | -0.54748479396     |
| 5.2813981306      | -0.30336289748     |
| 2.3194618632      | 0.68093278701      |
| 1 s               |                    |
| 1.2167512076      | 1.0000000000       |
| 3 s               |                    |
| 25.336266601      | 0.22414355064E-01  |
| 12.477043309      | -0.14737811818     |
| 3.0723142741      | 0.53278468779      |
| 1 s               |                    |
| 0.60174774699     | 1.0000000000       |
| 1 s               |                    |
| 0.28323936354     | 1.0000000000       |
| 1 s               |                    |
| 0.13221765728     | 1.0000000000       |
| 1 s               |                    |
| 0.60986718951E-01 | 1.0000000000       |
| 7 p               |                    |
| 162.89300000      | 0.37500000000E-03  |
| 30.399600000      | -0.47980000000E-02 |
| 19.000400000      | 0.54731000000E-01  |
| 9.3225600000      | -0.25528400000     |
| 3.0166800000      | 0.34537700000      |
| 1.8621900000      | 0.40483300000      |
| 1.1033100000      | 0.32592200000      |
| 3 p               |                    |
| 12.665326113      | -0.20694788562E-01 |
| 3.3473442879      | 0.26878411014      |
| 1.1722158971      | 0.72590523998      |
| 1 p               |                    |
| 0.58886745483     | 1.0000000000       |
| 1 p               |                    |
| 0.25014249608     | 1.0000000000       |
| 1 p               |                    |
| 0.11120161090     | 1.0000000000       |
| 1 p               |                    |
| 0.48206685448E-01 | 1.0000000000       |
| 8 d               |                    |
| 142.61790051      | 0.34691704136E-03  |
| 40.920334292      | 0.27417583490E-02  |
| 10.854520545      | -0.33847404142E-01 |
| 8.3926457719      | 0.42753986065E-01  |
| 4.1806878019      | 0.16545099365      |
| 2.5346474124      | 0.26821979719      |
| 1.5175455555      | 0.31482077294      |
| 0.86799625994     | 0.25485913704      |
| 1 d               |                    |
| 0.47323070711     | 1.0000000000       |
| 1 d               |                    |
| 0.24111763234     | 1.0000000000       |
| 1 d               |                    |
| 0.10080000000     | 1.0000000000       |
| 1 f               |                    |
| 0.48490000000     | 1.0000000000       |
| 1 f               |                    |
| 0.20490000000     | 1.0000000000       |
| 1 f               |                    |
| 1.7880600000      | 1.0000000000       |

```

1 f
5.6265581363      1.0000000000
1 g
0.42340000000    1.0000000000
*
sb def2-ecp
*
ncore =      28      lmax =      3
#      coefficient  r^n      exponent
f
      -15.3668010    2      14.4449780
      -20.2961380    2      14.4492950
s-f
      281.0715810    2      16.3308650
      61.7166040    2      8.5565420
      15.3668010    2      14.4449780
      20.2961380    2      14.4492950
p-f
      67.4573800    2      14.4703370
      134.9335030    2      13.8161940
      14.7163440    2      8.4249240
      29.5185120    2      8.0927280
      15.3668010    2      14.4449780
      20.2961380    2      14.4492950
d-f
      35.4478150    2      14.8863310
      53.1434660    2      15.1463190
      9.1792230     2      5.9082670
      13.2402530    2      5.5943220
      15.3668010    2      14.4449780
      20.2961380    2      14.4492950
*
*
te def2-QZVP
# te      (17s14p11d4f1g) / [7s6p4d4f1g]      {9131111/731111/8111/1111/1}
*
9 s
15746.300000      0.540000000000E-04
2369.2500000      0.398000000000E-03
535.86000000      0.166200000000E-02
141.88500000      0.363600000000E-02
27.819700000      -0.584270000000E-01
17.387900000      0.366520000000
10.865600000      -0.397589000000
6.5688500000      -0.519175000000
2.4013900000      0.687652000000
1 s
1.2865441585      1.0000000000
3 s
29.383253023      0.30079778033E-01
15.946408003      -0.13631630929
3.6679902632      0.53467574034
1 s
0.63533594694      1.0000000000
1 s
0.29807786206      1.0000000000
1 s
0.14061248688      1.0000000000
1 s
0.65660655893E-01  1.0000000000

```

```

7 p
750.22200000      0.520000000000E-04
163.96100000      0.410000000000E-03
16.922700000      0.833870000000E-01
10.575500000      -0.26821200000
5.7046200000      -0.229320000000E-01
2.9802200000      0.49554800000
1.5197000000      0.51452200000
3 p
13.925457258      -0.21336842159E-01
4.2323766654      0.22433961554
1.4547630727      0.73198528158
1 p
0.75528783692      1.00000000000
1 p
0.31829451168      1.00000000000
1 p
0.13721830923      1.00000000000
1 p
0.57099171462E-01  1.00000000000
8 d
146.30727119      0.43816018982E-03
42.243859354      0.33559305599E-02
9.9155377745      -0.11157186771
8.9949643607      0.13269569633
4.1376628430      0.21574044755
2.3659339431      0.32583679541
1.3736141857      0.30685918052
0.79846379228      0.19445241192
1 d
0.45685175394      1.00000000000
1 d
0.25022747959      1.00000000000
1 d
0.11560000000      1.00000000000
1 f
0.51840000000      1.00000000000
1 f
0.21350000000      1.00000000000
1 f
1.9347800000      1.00000000000
1 f
5.8043400000      1.00000000000
1 g
0.42940000000      1.00000000000
*
te def2-ecp
*
ncore = 28      lmax = 3
#      coefficient      r^n      exponent
f
      -15.7454500      2      15.2061680
      -20.7424480      2      15.2017020
s-f
      281.0458430      2      16.8144730
      61.6206560      2      8.7935260
      15.7454500      2      15.2061680
      20.7424480      2      15.2017020
p-f
      67.4494640      2      14.8778010

```

|     |                   |                                |                              |
|-----|-------------------|--------------------------------|------------------------------|
|     | 134.9043040       | 2                              | 14.2697310                   |
|     | 14.6895470        | 2                              | 8.7244350                    |
|     | 29.4150630        | 2                              | 8.2915150                    |
|     | 15.7454500        | 2                              | 15.2061680                   |
|     | 20.7424480        | 2                              | 15.2017020                   |
| d-f |                   |                                |                              |
|     | 35.4320570        | 2                              | 15.2050080                   |
|     | 53.1356870        | 2                              | 15.2258480                   |
|     | 9.0698020         | 2                              | 6.0717690                    |
|     | 13.1223040        | 2                              | 5.8047600                    |
|     | 15.7454500        | 2                              | 15.2061680                   |
|     | 20.7424480        | 2                              | 15.2017020                   |
| *   |                   |                                |                              |
| *   |                   |                                |                              |
| i   | def2-QZVP         |                                |                              |
| #   | i                 | (17s14p11d4f1g) / [7s6p4d4f1g] | {9131111/731111/8111/1111/1} |
| *   |                   |                                |                              |
|     | 9                 | s                              |                              |
|     | 16788.400000      | 0.410000000000E-04             |                              |
|     | 2526.6400000      | 0.303000000000E-03             |                              |
|     | 571.98400000      | 0.124700000000E-02             |                              |
|     | 150.43400000      | 0.265900000000E-02             |                              |
|     | 29.540500000      | -0.531900000000E-01            |                              |
|     | 18.457100000      | 0.34009600000                  |                              |
|     | 11.528600000      | -0.35235500000                 |                              |
|     | 7.0828900000      | -0.54138500000                 |                              |
|     | 2.5040500000      | 0.71574900000                  |                              |
|     | 1                 | s                              |                              |
|     | 1.3540144781      | 1.0000000000                   |                              |
|     | 3                 | s                              |                              |
|     | 25.058617933      | 0.40897754402E-01              |                              |
|     | 15.621979372      | -0.14269668187                 |                              |
|     | 3.3536325162      | 0.52916319279                  |                              |
|     | 1                 | s                              |                              |
|     | 0.67430472704     | 1.0000000000                   |                              |
|     | 1                 | s                              |                              |
|     | 0.32727136949     | 1.0000000000                   |                              |
|     | 1                 | s                              |                              |
|     | 0.15749364119     | 1.0000000000                   |                              |
|     | 1                 | s                              |                              |
|     | 0.74377727841E-01 | 1.0000000000                   |                              |
|     | 7                 | p                              |                              |
|     | 656.27400000      | 0.91000000000E-04              |                              |
|     | 149.23200000      | 0.61300000000E-03              |                              |
|     | 19.015300000      | 0.59923000000E-01              |                              |
|     | 10.737800000      | -0.24925800000                 |                              |
|     | 6.4420800000      | -0.43750000000E-02             |                              |
|     | 3.0920300000      | 0.51399900000                  |                              |
|     | 1.5787400000      | 0.50721300000                  |                              |
|     | 3                 | p                              |                              |
|     | 15.660511893      | -0.22143803592E-01             |                              |
|     | 4.9250669812      | 0.23518064355                  |                              |
|     | 1.6692319982      | 0.73153925548                  |                              |
|     | 1                 | p                              |                              |
|     | 0.77817898176     | 1.0000000000                   |                              |
|     | 1                 | p                              |                              |
|     | 0.35608843716     | 1.0000000000                   |                              |
|     | 1                 | p                              |                              |
|     | 0.15493242649     | 1.0000000000                   |                              |
|     | 1                 | p                              |                              |

```

0.64666212492E-01  1.0000000000
  8 d
318.22407776      0.10951692560E-03
95.810227352     0.91919139268E-03
35.322295259     0.47916935207E-02
13.107447819     -0.16280459996E-01
6.2949152988     0.90889609141E-01
3.6826101201     0.27483543784
2.0858950647     0.36067901632
1.1644342344     0.28384002219
  1 d
0.63180613129    1.0000000000
  1 d
0.32215084697    1.0000000000
  1 d
0.13490000000    1.0000000000
  1 f
0.58780000000    1.0000000000
  1 f
0.25000000000    1.0000000000
  1 f
2.17800000000    1.0000000000
  1 f
6.4253613600     1.0000000000
  1 g
0.47390000000    1.0000000000

```

```

*
i def2-ecp
*

```

```

ncore = 28      lmax = 3
#      coefficient  r^n      exponent
f
      -21.8420400   2      19.4586090
      -28.4681910   2      19.3492600
      -0.2437130    2      4.8237670
      -0.3208040    2      4.8843150
s-f
      49.9942930    2      40.0158350
      281.0253170   2      17.4297470
      61.5733260    2      9.0054840
      21.8420400    2      19.4586090
      28.4681910    2      19.3492600
      0.2437130     2      4.8237670
      0.3208040     2      4.8843150
p-f
      67.4428410    2      15.3554660
      134.8811370   2      14.9718330
      14.6750510    2      8.9601640
      29.3756660    2      8.2590960
      21.8420400    2      19.4586090
      28.4681910    2      19.3492600
      0.2437130     2      4.8237670
      0.3208040     2      4.8843150
d-f
      35.4395290     2      15.0689080
      53.1760570     2      14.5553220
      9.0671950      2      6.7186470
      13.2069370     2      6.4563930
      0.0893350      2      1.1917790
      0.0523800      2      1.2911570

```



|            |   |            |
|------------|---|------------|
| 21.8420400 | 2 | 19.4586090 |
| 28.4681910 | 2 | 19.3492600 |
| 0.2437130  | 2 | 4.8237670  |
| 0.3208040  | 2 | 4.8843150  |

\*  
\*

xe def2-QZVP

# xe (17s14p11d4f1g) / [7s6p4d4f1g] {9131111/731111/8111/1111/1}

\*

|                   |                     |
|-------------------|---------------------|
| 9 s               |                     |
| 18774.300000      | 0.680000000000E-04  |
| 2824.8100000      | 0.501000000000E-03  |
| 640.08800000      | 0.209700000000E-02  |
| 172.61600000      | 0.449300000000E-02  |
| 29.516900000      | -0.471510000000E-01 |
| 18.444800000      | 0.374033000000      |
| 11.523800000      | -0.512826000000     |
| 6.6189000000      | -0.478624000000     |
| 2.9955200000      | 0.596471000000      |
| 1 s               |                     |
| 1.6532586536      | 1.000000000000      |
| 3 s               |                     |
| 27.052171835      | 0.11189611954       |
| 20.940622415      | -0.24055422724      |
| 6.0024591071      | 0.51452076187       |
| 1 s               |                     |
| 0.87553889270     | 1.000000000000      |
| 1 s               |                     |
| 0.41033616654     | 1.000000000000      |
| 1 s               |                     |
| 0.19493585779     | 1.000000000000      |
| 1 s               |                     |
| 0.90171093041E-01 | 1.000000000000      |
| 7 p               |                     |
| 613.33100000      | 0.138000000000E-03  |
| 141.71000000      | 0.853000000000E-03  |
| 20.310600000      | 0.550240000000E-01  |
| 11.033100000      | -0.252988000000     |
| 6.8951300000      | 0.974600000000E-02  |
| 3.2416600000      | 0.526797000000      |
| 1.6653500000      | 0.501832000000      |
| 3 p               |                     |
| 18.388908413      | -0.24514446229E-01  |
| 6.1139045431      | 0.25265669670       |
| 1.8729815691      | 0.72938328969       |
| 1 p               |                     |
| 0.82004665991     | 1.000000000000      |
| 1 p               |                     |
| 0.39552648254     | 1.000000000000      |
| 1 p               |                     |
| 0.17445509815     | 1.000000000000      |
| 1 p               |                     |
| 0.73389992663E-01 | 1.000000000000      |
| 8 d               |                     |
| 315.66106865      | 0.14235585191E-03   |
| 95.553873651      | 0.11707875751E-02   |
| 35.451236301      | 0.58783160362E-02   |
| 13.153211283      | -0.16764226287E-01  |
| 6.3847329564      | 0.11558421625       |
| 3.6968166410      | 0.30375919653       |

```

2.0976070364      0.36037726827
1.1951246616      0.24813434400
  1 d
0.68431725339      1.00000000000
  1 d
0.37710480204      1.00000000000
  1 d
0.16760000000      1.00000000000
  1 f
0.66190000000      1.00000000000
  1 f
0.29790000000      1.00000000000
  1 f
2.43230000000      1.00000000000
  1 f
7.2077391789      1.00000000000
  1 g
0.52780000000      1.00000000000
*
xe def2-ecp
*
  ncore =      28      lmax =      3
#      coefficient      r^n      exponent
f
      -23.0892950      2      20.8815570
      -30.0744750      2      20.7834430
      -0.2882270      2      5.2533890
      -0.3869240      2      5.3611880
s-f
      49.9979620      2      40.0051840
      281.0133030      2      17.8122140
      61.5382550      2      9.3041500
      23.0892950      2      20.8815570
      30.0744750      2      20.7834430
      0.2882270      2      5.2533890
      0.3869240      2      5.3611880
p-f
      67.4391420      2      15.7017720
      134.8747110      2      15.2586080
      14.6633000      2      9.2921840
      29.3547300      2      8.5590030
      23.0892950      2      20.8815570
      30.0744750      2      20.7834430
      0.2882270      2      5.2533890
      0.3869240      2      5.3611880
d-f
      35.4369080      2      15.1856000
      53.1957720      2      14.2845000
      9.0462320      2      7.1218890
      13.2236810      2      6.9919630
      0.0848530      2      0.6239460
      0.0441550      2      0.6472840
      23.0892950      2      20.8815570
      30.0744750      2      20.7834430
      0.2882270      2      5.2533890
      0.3869240      2      5.3611880
*
*
cs def2-QZVP
# cs      (8s7p5d1f) / [6s5p3d1f]      {311111/31111/311/1}

```

```

*
  3 s
  5.8684829520      0.12906631816
  4.3741038860     -0.34380446158
  1.7951201473      0.69937346606
  1 s
  0.37816941125     1.00000000000
  1 s
  0.16624693130     1.00000000000
  1 s
  0.27763176052E-01  1.00000000000
  1 s
  0.16113005842E-01  1.00000000000
  1 s
  0.10996108743E-01  1.00000000000
  3 p
  4.2749775718      0.45595316685E-01
  1.9639316240     -0.25031125651
  0.47666322385     0.55660114378
  1 p
  0.21736718772     1.00000000000
  1 p
  0.97276293828E-01  1.00000000000
  1 p
  0.26770518041E-01  1.00000000000
  1 p
  0.10845412222E-01  1.00000000000
  3 d
  2.0091044335     -0.34453182058E-02
  0.35778351451     0.22686596025
  0.11070568254     0.47180885981
  1 d
  0.33216214821E-01  1.00000000000
  1 d
  0.11409380652E-01  1.00000000000
  1 f
  0.58777000000     0.00000000000
*
cs def2-ecp
*
  ncore =      46          lmax =      3
#      coefficient      r^n      exponent
f      -28.8843090      2      3.1232690
s-f      84.5477300      2      4.0797500
      16.6541730      2      2.4174060
      28.8843090      2      3.1232690
p-f      157.0490590      2      5.5140800
      26.4233070      2      2.1603160
      28.8843090      2      3.1232690
d-f      13.1727530      2      1.8074100
      3.3428330      2      0.8581820
      28.8843090      2      3.1232690
*
*
ba def2-QZVP
# ba      (8s8p5d1f) / [7s5p3d1f]      {2111111/41111/311/1}

```

```

*
  2 s
  5.7000000000      1.3292982002
  5.2043612469     -1.7367497134
  1 s
  2.1475437282      1.0000000000
  1 s
  0.41033660537     1.0000000000
  1 s
  0.18393532770     1.0000000000
  1 s
  0.72521216545E-01  1.0000000000
  1 s
  0.34526334903E-01  1.0000000000
  1 s
  0.16157891872E-01  1.0000000000
  4 p
  5.6000000000      0.51385026013
  5.1104879274     -0.70529238864
  2.5006544803      0.42822329830
  0.51947995345     -0.57125984472
  1 p
  0.24536994841     1.0000000000
  1 p
  0.11256056700     1.0000000000
  1 p
  0.34917622027E-01  1.0000000000
  1 p
  0.16320065666E-01  1.0000000000
  3 d
  2.7000000000      0.14372069824
  2.3460740881     -0.19565347309
  0.39553542609     0.29963058552
  1 d
  0.12967935859     1.0000000000
  1 d
  0.40463066544E-01  1.0000000000
  1 f
  0.65760000000     0.0000000000

```

```

*
ba def2-ecp
*
ncore =      46          lmax =      3
#      coefficient      r^n      exponent
f      -33.4731740      2          3.5894650
s-f      427.8458160      2          9.5269860
          204.4175300      2          4.4875100
          33.4731740      2          3.5894650
p-f      293.6058640      2          8.3159300
          294.1933160      2          4.2922170
          33.4731740      2          3.5894650
d-f      112.5504020      2          5.9161080
          181.7826210      2          2.8748420
          33.4731740      2          3.5894650

```

```

*
*
```

```

la def2-QZVP
# la      (9s8p6d3f1g) / [7s5p4d3f1g]      {3111111/41111/3111/111/1}
*

```

```

  3 s
26.077272000      0.23198684846E-02
 5.7127838000    -0.29787719611
 4.4057848000    0.70022722515
  1 s
 2.1315325829    1.00000000000
  1 s
0.49385808956    1.00000000000
  1 s
0.23595687888    1.00000000000
  1 s
0.63593489661E-01 1.00000000000
  1 s
0.31545394754E-01 1.00000000000
  1 s
0.15777655296E-01 1.00000000000
  4 p
 6.0000000000    -0.11397960924E-01
 3.6808191615    0.14675038550
 2.3265462081    -0.35581819167
0.64342629633    0.45834955229
  1 p
0.33584281962    1.00000000000
  1 p
0.16519051916    1.00000000000
  1 p
0.56715971797E-01 1.00000000000
  1 p
0.22100824776E-01 1.00000000000
  3 d
 1.2000000000    -0.35803482414
 1.0239524401    0.40483734122
0.37508490282    0.37649639849
  1 d
0.17161940245    1.00000000000
  1 d
0.78780423402E-01 1.00000000000
  1 d
0.35000047794E-01 1.00000000000
  1 f
0.65580000000    1.00000000000
  1 f
0.25683000000    1.00000000000
  1 f
0.10058000000    1.00000000000
  1 g
0.17907000000    1.00000000000
*

```

```

la def2-ecp

```

```

*
  ncore =    46          lmax =    3
#   coefficient   r^n      exponent
f
  -36.0100160     2         4.0286000
s-f
   91.9321770     2         3.3099000
  -3.7887640     2         1.6550000

```

|      |                              |                    |                             |
|------|------------------------------|--------------------|-----------------------------|
|      | 36.0100160                   | 2                  | 4.0286000                   |
| p-f  | 63.7594860                   | 2                  | 2.8368000                   |
|      | -0.6479580                   | 2                  | 1.4184000                   |
|      | 36.0100160                   | 2                  | 4.0286000                   |
| d-f  | 36.1161730                   | 2                  | 2.0213000                   |
|      | 0.2191140                    | 2                  | 1.0107000                   |
|      | 36.0100160                   | 2                  | 4.0286000                   |
| *    |                              |                    |                             |
| *    |                              |                    |                             |
| hf   | def2-QZVP                    |                    |                             |
| # hf | (10s8p6d3f1g) / [7s5p4d3f1g] |                    | {41111111/41111/3111/111/1} |
| *    |                              |                    |                             |
|      | 4 s                          |                    |                             |
|      | 24.000000000                 | 0.19369448644      |                             |
|      | 16.000000000                 | -3.5064630782      |                             |
|      | 14.400000000                 | 4.3082581000       |                             |
|      | 10.304504667                 | -0.91045809742     |                             |
|      | 1 s                          |                    |                             |
|      | 3.8372797792                 | 1.0000000000       |                             |
|      | 1 s                          |                    |                             |
|      | 0.94649028050                | 1.0000000000       |                             |
|      | 1 s                          |                    |                             |
|      | 0.44397931299                | 1.0000000000       |                             |
|      | 1 s                          |                    |                             |
|      | 0.13656009445                | 1.0000000000       |                             |
|      | 1 s                          |                    |                             |
|      | 0.66549732509E-01            | 1.0000000000       |                             |
|      | 1 s                          |                    |                             |
|      | 0.28719110054E-01            | 1.0000000000       |                             |
|      | 4 p                          |                    |                             |
|      | 17.000000000                 | -0.30316491880E-01 |                             |
|      | 11.738072097                 | 0.10139279686      |                             |
|      | 4.9203967161                 | -0.28227924657     |                             |
|      | 1.1251726138                 | 0.52032008501      |                             |
|      | 1 p                          |                    |                             |
|      | 0.54220114055                | 1.0000000000       |                             |
|      | 1 p                          |                    |                             |
|      | 0.25659447877                | 1.0000000000       |                             |
|      | 1 p                          |                    |                             |
|      | 0.10000000000                | 1.0000000000       |                             |
|      | 1 p                          |                    |                             |
|      | 0.41700000000E-01            | 1.0000000000       |                             |
|      | 3 d                          |                    |                             |
|      | 6.9644775309                 | 0.90606952386E-01  |                             |
|      | 5.7275227587                 | -0.16459899714     |                             |
|      | 1.1503305416                 | 0.51375718250      |                             |
|      | 1 d                          |                    |                             |
|      | 0.47559482991                | 0.97807169690      |                             |
|      | 1 d                          |                    |                             |
|      | 0.18774414759                | 1.0000000000       |                             |
|      | 1 d                          |                    |                             |
|      | 0.68439488104E-01            | 1.0000000000       |                             |
|      | 1 f                          |                    |                             |
|      | 0.80387000000                | 1.0000000000       |                             |
|      | 1 f                          |                    |                             |
|      | 0.31547000000                | 1.0000000000       |                             |
|      | 1 f                          |                    |                             |
|      | 0.12380000000                | 1.0000000000       |                             |

```

1 g
0.29036000000 1.0000000000
*
hf def2-ecp
*
ncore = 60 lmax = 3
# coefficient r^n exponent
f
10.0467225 2 1.7857698
s-f
1499.2847107 2 14.7699590
40.2821014 2 7.3849794
-10.0467225 2 1.7857698
p-f
397.7330053 2 9.8494895
19.3164059 2 4.9247445
-10.0467225 2 1.7857698
d-f
101.3298053 2 6.0967564
5.8734382 2 3.0483782
-10.0467225 2 1.7857698
*
*
ta def2-QZVP
# ta (10s8p6d3f1g) / [7s5p4d3f1g] {4111111/41111/3111/111/1}
*
4 s
24.473650944 0.20537515818
18.721372549 -0.74477445680
11.500000000 3.4067771001
10.350000000 -2.8222400335
1 s
3.8125414615 1.0000000000
1 s
1.0507430630 1.0000000000
1 s
0.49732275755 1.0000000000
1 s
0.15602650970 1.0000000000
1 s
0.75056442354E-01 1.0000000000
1 s
0.31632668803E-01 1.0000000000
4 p
17.000000000 -0.32577305616E-01
12.008186536 0.10336287365
5.0278760583 -0.28526521696
1.1937124184 0.51790141155
1 p
0.57889707053 1.0000000000
1 p
0.27225198801 1.0000000000
1 p
0.10000000000 1.0000000000
1 p
0.41700000000E-01 1.0000000000
3 d
7.1419762952 0.88606814221E-01
5.7696869171 -0.17156962221
1.2199483941 0.53547693505

```

```

1 d
0.52366034246      1.0000000000
1 d
0.21384808767      1.0000000000
1 d
0.80254256735E-01  1.0000000000
1 f
0.95070000000      1.0000000000
1 f
0.37386000000      1.0000000000
1 f
0.14702000000      1.0000000000
1 g
0.40165000000      1.0000000000
*
ta def2-ecp
*
ncore =      60      lmax =      3
#      coefficient  r^n      exponent
f
      12.0179609      2      2.0178811
s-f
      1345.8806470      2      14.5464077
      36.7668062      2      7.2732038
      -12.0179609      2      2.0178811
p-f
      378.4253015      2      9.9355653
      22.2930909      2      4.9677824
      -12.0179609      2      2.0178811
d-f
      104.8839557      2      6.3473769
      8.7558481      2      3.1736885
      -12.0179609      2      2.0178811
*
*
w def2-QZVP
# w      (10s8p6d3f1g) / [7s5p4d3f1g]      {4111111/41111/3111/111/1}
*
4 s
22.106487883      0.66320504570
18.958062620      -1.5576189160
13.128699049      2.1416485467
10.149417378      -1.1823364947
1 s
4.0160322414      1.0000000000
1 s
1.1234496158      1.0000000000
1 s
0.53500662821      1.0000000000
1 s
0.17127449658      1.0000000000
1 s
0.80452897876E-01  1.0000000000
1 s
0.33669872229E-01  1.0000000000
4 p
17.000000000      -0.37817768433E-01
12.431973432      0.10905673845
5.1586217658      -0.29399955020
1.2801454812      0.51560726697

```



```

1 p
0.62856790898      1.0000000000
1 p
0.29380423553      1.0000000000
1 p
0.10000000000      1.0000000000
1 p
0.41700000000E-01  1.0000000000
3 d
7.4064737315      0.86993963018E-01
5.9026268603      -0.17667540011
1.2984756750      0.55145697030
1 d
0.57153508541      1.0000000000
1 d
0.23845526606      1.0000000000
1 d
0.91144267331E-01  1.0000000000
1 f
1.0962400000      1.0000000000
1 f
0.43199000000      1.0000000000
1 f
0.17023000000      1.0000000000
1 g
0.51293000000      1.0000000000
*
w def2-ecp
*
ncore = 60          lmax = 3
# coefficient      r^n      exponent
f
14.1525795        2          2.2588885
s-f
1192.3958823      2          14.3228564
32.5229332        2          7.1614281
-14.1525795       2          2.2588885
p-f
359.0319671       2          10.0216411
24.0303802        2          5.0108204
-14.1525795       2          2.2588885
d-f
108.3013490       2          6.5979974
10.9825283        2          3.2989987
-14.1525795       2          2.2588885
*
*
re def2-QZVP
# re (10s8p6d3f1g) / [7s5p4d3f1g] {4111111/41111/3111/111/1}
*
4 s
24.000000000      0.26968047163
18.204262749      -1.3559378623
14.048192487      1.9003709759
9.5166786954      -0.75626964015
1 s
4.1714667981      1.0000000000
1 s
1.1944213976      1.0000000000
1 s

```

```

0.56755447797      1.0000000000
 1 s
0.17533854868      1.0000000000
 1 s
0.82014250464E-01  1.0000000000
 1 s
0.34607892740E-01  1.0000000000
 4 p
18.000000000      -0.26890962397E-01
12.318606250      0.99711498502E-01
 5.3719234505     -0.29289398145
 1.3506646748      0.51466301434
 1 p
0.66212816808      1.0000000000
 1 p
0.31071385193      1.0000000000
 1 p
0.10800000000      1.0000000000
 1 p
0.45000000000E-01  1.0000000000
 3 d
 7.7352877672     0.83901798556E-01
 6.0949443610     -0.17722258734
 1.3871105497     0.55238259692
 1 d
0.62324027854      1.0000000000
 1 d
0.26517328547      1.0000000000
 1 d
0.10321096849      1.0000000000
 1 f
 1.2406000000      1.0000000000
 1 f
0.48989000000      1.0000000000
 1 f
0.19345000000      1.0000000000
 1 g
0.62422000000      1.0000000000
*
re def2-ecp
*
  ncore =      60      lmax =      3
#      coefficient  r^n      exponent
f      16.4498523    2      2.5086506
s-f    1038.9515723   2      14.0993051
      29.5617383    2      7.0496525
      -16.4498523   2      2.5086506
p-f    339.5435096    2      10.1077169
      24.9136965    2      5.0538583
      -16.4498523   2      2.5086506
d-f    111.6996527    2      6.8486179
      12.6243293    2      3.4243090
      -16.4498523   2      2.5086506
*
*
os def2-QZVP

```

# os (10s8p6d3f1g) / [7s5p4d3f1g] {4111111/41111/3111/111/1}

```
*
  4 s
24.000000000 0.24559132972
18.204262749 -1.3020204925
14.048192487 1.9114896000
9.5166786954 -0.83098846799
  1 s
4.2529406042 1.0000000000
  1 s
1.2999583502 1.0000000000
  1 s
0.61756850127 1.0000000000
  1 s
0.18785305474 1.0000000000
  1 s
0.87865523960E-01 1.0000000000
  1 s
0.37004242944E-01 1.0000000000
  4 p
15.500000000 0.16016463376
14.000000000 -0.23201520402
5.5458290420 0.29772587274
1.4139502215 -0.54253238176
  1 p
0.68136686765 1.0000000000
  1 p
0.30911452647 1.0000000000
  1 p
0.90000000000E-01 1.0000000000
  1 p
0.33000000000E-01 1.0000000000
  3 d
8.5557226523 0.55081304746E-01
6.1927250845 -0.15041777374
1.4916733698 0.55087247584
  1 d
0.67423241512 1.0000000000
  1 d
0.28635737076 1.0000000000
  1 d
0.11074292707 1.0000000000
  1 f
1.3802600000 1.0000000000
  1 f
0.55065000000 1.0000000000
  1 f
0.21968000000 1.0000000000
  1 g
0.75489000000 1.0000000000
```

\*  
os def2-ecp  
\*

```
ncore = 60 lmax = 3
# coefficient r^n exponent
f 18.9094570 2 2.7670751
s-f 885.4057191 2 13.8757539
25.9670401 2 6.9378769
```

|     |             |   |            |
|-----|-------------|---|------------|
|     | -18.9094570 | 2 | 2.7670751  |
| p-f | 320.0839019 | 2 | 10.1937926 |
|     | 26.1487649  | 2 | 5.0968962  |
|     | -18.9094570 | 2 | 2.7670751  |
| d-f | 115.0448431 | 2 | 7.0992385  |
|     | 13.6225746  | 2 | 3.5496192  |
|     | -18.9094570 | 2 | 2.7670751  |

\*

\*

ir def2-QZVP

# ir (10s8p6d3f1g) / [7s5p4d3f1g] {4111111/41111/3111/111/1}

\*

|                   |   |                    |  |
|-------------------|---|--------------------|--|
| 4                 | s |                    |  |
| 23.465507222      |   | 0.71085679679      |  |
| 20.657091116      |   | -1.5723547785      |  |
| 15.725107858      |   | 1.2938086001       |  |
| 7.9297463605      |   | -0.42980466966     |  |
| 1                 | s |                    |  |
| 4.5196120103      |   | 1.0000000000       |  |
| 1                 | s |                    |  |
| 1.3392891402      |   | 1.0000000000       |  |
| 1                 | s |                    |  |
| 0.63692276928     |   | 1.0000000000       |  |
| 1                 | s |                    |  |
| 0.19126770642     |   | 1.0000000000       |  |
| 1                 | s |                    |  |
| 0.87881999015E-01 |   | 1.0000000000       |  |
| 1                 | s |                    |  |
| 0.37643105533E-01 |   | 1.0000000000       |  |
| 4                 | p |                    |  |
| 15.902664143      |   | -0.16290720099     |  |
| 14.415830698      |   | 0.23483212987      |  |
| 5.7597608991      |   | -0.30305337176     |  |
| 1.5008913108      |   | 0.55512982069      |  |
| 1                 | p |                    |  |
| 0.72348035957     |   | 1.0000000000       |  |
| 1                 | p |                    |  |
| 0.32785980328     |   | 1.0000000000       |  |
| 1                 | p |                    |  |
| 0.91000000000E-01 |   | 1.0000000000       |  |
| 1                 | p |                    |  |
| 0.35000000000E-01 |   | 1.0000000000       |  |
| 3                 | d |                    |  |
| 8.9686781612      |   | 0.29754685954E-01  |  |
| 6.4456319498      |   | -0.82246052942E-01 |  |
| 1.5835819740      |   | 0.29212392062      |  |
| 1                 | d |                    |  |
| 0.71871917882     |   | 0.45371657855      |  |
| 1                 | d |                    |  |
| 0.30539233284     |   | 0.35080208829      |  |
| 1                 | d |                    |  |
| 0.11791405498     |   | 0.12106264000      |  |
| 1                 | f |                    |  |
| 1.5134800000      |   | 1.0000000000       |  |
| 1                 | f |                    |  |
| 0.61008000000     |   | 1.0000000000       |  |
| 1                 | f |                    |  |
| 0.24592000000     |   | 1.0000000000       |  |

```

1 g
0.88556000000 1.0000000000
*
ir def2-ecp
*
ncore = 60 lmax = 3
# coefficient r^n exponent
f
21.5310311 2 3.0340719
s-f
732.2691998 2 13.6522026
26.4847209 2 6.8261013
-21.5310311 2 3.0340719
p-f
299.4894736 2 10.2798684
26.4662335 2 5.1399341
-21.5310311 2 3.0340719
d-f
124.4575945 2 7.3498590
14.0359952 2 3.6749295
-21.5310311 2 3.0340719
*
*
pt def2-QZVP
# pt (10s8p6d3f1g) / [7s5p4d3f1g] {4111111/41111/3111/111/1}
*
4 s
23.465507222 0.55150926143
20.657091116 -1.2690274107
15.725107858 1.1215145470
7.9297463605 -0.42250178029
1 s
4.6667116243 1.0000000000
1 s
1.4202522633 1.0000000000
1 s
0.66786671541 1.0000000000
1 s
0.19745059689 1.0000000000
1 s
0.92573920368E-01 1.0000000000
1 s
0.38895936899E-01 1.0000000000
4 p
15.500000000 -0.15672718629
14.000000000 0.23853412989
6.1161212339 -0.31041379733
1.5715586385 0.56473525089
1 p
0.75132510781 1.0000000000
1 p
0.33306466812 1.0000000000
1 p
0.91000000000E-01 1.0000000000
1 p
0.35000000000E-01 1.0000000000
3 d
8.3207937611 0.62945508668E-01
7.4207226520 -0.90271154330E-01
1.6570410639 0.16812340903

```

```

1 d
0.73943569960      1.0000000000
1 d
0.30508290090      1.0000000000
1 d
0.11350435924      1.0000000000
1 f
1.6402500000      1.0000000000
1 f
0.66813000000      1.0000000000
1 f
0.27215000000      1.0000000000
1 g
1.0162300000      1.0000000000
*
pt def2-ecp
*
ncore = 60          lmax = 3
# coefficient      r^n          exponent
f
24.3143757        2            3.3095686
s-f
579.2238609      2            13.4286513
29.6694906       2            6.7143256
-24.3143757      2            3.3095686
p-f
280.8607742      2            10.3659442
26.7453820       2            5.1829721
-24.3143757      2            3.3095686
d-f
120.3964443      2            7.6004795
15.8109206       2            3.8002397
-24.3143757      2            3.3095686
*
*
au def2-QZVP
# au (9s8p6d3f1g) / [7s5p4d3f1g] {31111111/41111/3111/111/1}
*
3 s
24.200000000      1.4645004443
22.000000000      -3.9770190496
20.000000000      2.7298033533
1 s
5.4043553001      1.0000000000
1 s
1.4532546773      1.0000000000
1 s
0.68294298420     1.0000000000
1 s
0.19002755303     1.0000000000
1 s
0.88155981740E-01 1.0000000000
1 s
0.37739555187E-01 1.0000000000
4 p
15.500000000      0.15001711880
14.000000000      -0.23609813183
6.4227368205      0.31458896948
1.6595601681      -0.57279670446
1 p

```

```

0.79402913993      1.0000000000
 1 p
0.35125155397      1.0000000000
 1 p
0.810000000000E-01  1.0000000000
 1 p
0.250000000000E-01  1.0000000000
 3 d
 8.6000000000      0.15361654684
 7.8531899379     -0.20443530663
 1.7650856798      0.30781811607
 1 d
0.79482263260      1.0000000000
 1 d
0.33085396360      1.0000000000
 1 d
0.12398535801      1.0000000000
 1 f
 1.7607400000      1.0000000000
 1 f
0.72482000000      1.0000000000
 1 f
0.29838000000      1.0000000000
 1 g
 1.1469000000      1.0000000000
*
au def2-ecp
*
  ncore =    60      lmax =    3
#      coefficient  r^n      exponent
f
      30.4900889    2        4.7898200
      5.1710738    2        2.3949100
s-f
      426.8466792   2        13.2051000
      37.0070829   2        6.6025500
     -30.4900889   2        4.7898200
      -5.1710738   2        2.3949100
p-f
      261.1995804   2        10.4520200
      26.9624960   2        5.2260100
     -30.4900889   2        4.7898200
      -5.1710738   2        2.3949100
d-f
      124.7906656   2        7.8511000
      16.3007257   2        3.9255500
     -30.4900889   2        4.7898200
      -5.1710738   2        2.3949100
*
*
hg def2-QZVP
# hg      (9s8p7d3f1g) / [7s5p4d3f1g]      {31111111/41111/4111/111/1}
*
  3 s
48.013786990      0.56241403333E-02
21.239875095     -0.17054083503
15.876100879      0.35940389661
 1 s
5.4865939429      1.0000000000
 1 s

```

|                   |                    |
|-------------------|--------------------|
| 1.5521766895      | 1.0000000000       |
| 1 s               |                    |
| 0.74742541187     | 1.0000000000       |
| 1 s               |                    |
| 0.20268838483     | 1.0000000000       |
| 1 s               |                    |
| 0.93376229211E-01 | 1.0000000000       |
| 1 s               |                    |
| 0.41248705609E-01 | 1.0000000000       |
| 4 p               |                    |
| 17.500000000      | -0.86457187331E-01 |
| 15.252594855      | 0.15327318234      |
| 6.4404715169      | -0.30274955249     |
| 1.8180159920      | 0.54361285026      |
| 1 p               |                    |
| 0.90067981801     | 1.0000000000       |
| 1 p               |                    |
| 0.41304540122     | 1.0000000000       |
| 1 p               |                    |
| 0.11845702655     | 1.0000000000       |
| 1 p               |                    |
| 0.36087619349E-01 | 1.0000000000       |
| 4 d               |                    |
| 11.888648987      | 0.13311219898E-01  |
| 6.7773660954      | -0.73346199848E-01 |
| 2.0934941340      | 0.24155986719      |
| 1.0817087176      | 0.38865972362      |
| 1 d               |                    |
| 0.53329136060     | 1.0000000000       |
| 1 d               |                    |
| 0.24984101827     | 1.0000000000       |
| 1 d               |                    |
| 0.10879770063     | 1.0000000000       |
| 1 f               |                    |
| 1.8893800000      | 1.0000000000       |
| 1 f               |                    |
| 0.79569000000     | 1.0000000000       |
| 1 f               |                    |
| 0.33510000000     | 1.0000000000       |
| 1 g               |                    |
| 1.2895000000      | 1.0000000000       |

\*

hg def2-ecp

\*

| #   | ncore = 60 | lmax = 3 | coefficient | r^n | exponent   |
|-----|------------|----------|-------------|-----|------------|
| f   |            |          | 30.3649964  | 2   | 3.8857911  |
| s-f |            |          | 275.7372117 | 2   | 12.9815487 |
|     |            |          | 49.0892125  | 2   | 6.4907744  |
|     |            |          | -30.3649964 | 2   | 3.8857911  |
| p-f |            |          | 241.5400740 | 2   | 10.5380958 |
|     |            |          | 27.3965908  | 2   | 5.2690479  |
|     |            |          | -30.3649964 | 2   | 3.8857911  |
| d-f |            |          | 127.8670076 | 2   | 8.1017205  |
|     |            |          | 16.6083115  | 2   | 4.0508603  |
|     |            |          | -30.3649964 | 2   | 3.8857911  |



```

*
*
t1 def2-QZVP
# t1      (17s14p10d4f1g) / [7s6p4d4f1g]      {9131111/731111/7111/1111/1}
*
  9 s
  9675.5500000      0.800000000000E-05
  1471.4800000      0.570000000000E-04
  323.648000000     0.227000000000E-03
  33.807900000      0.216660000000E-01
  21.131600000      -0.19589700000
  13.209100000      0.67362000000
  8.2561100000      -0.57167600000
  5.1001400000      -0.61234400000
  1.8194300000      0.75954400000
  1 s
0.96804610176      1.00000000000
  3 s
  13.432924081      0.16050252545
  11.126956705      -0.25827112953
  2.0351129325      0.52570088358
  1 s
0.47288027019      1.00000000000
  1 s
0.21703241765      1.00000000000
  1 s
0.99551664344E-01  1.00000000000
  1 s
0.44674475181E-01  1.00000000000
  7 p
  42.524000000      0.160500000000E-02
  21.395700000      -0.231590000000E-01
  13.373700000      0.11173800000
  6.6133700000      -0.34647200000
  2.0421700000      0.47507300000
  1.1144900000      0.48633500000
0.59800600000      0.20513900000
  3 p
  9.0557032031      -0.57376712693E-01
  3.9424773914      0.27305802340
  1.2382159385      0.72255078460
  1 p
0.29943260745      1.00000000000
  1 p
0.14250182360      1.00000000000
  1 p
0.61655072518E-01  1.00000000000
  1 p
0.26054870511E-01  1.00000000000
  7 d
  63.792149375      0.19539028558E-03
  10.854099697      0.17775848298E-01
  6.3885280565      -0.89213657526E-01
  2.4120875010      0.18424406191
  1.4246170706      0.30659722011
0.83496548780      0.31018961556
0.48634320397      0.23215648111
  1 d
0.27592111650      1.00000000000
  1 d

```

```

0.14737244064      1.0000000000
  1 d
0.677000000000E-01  1.0000000000
  1 f
0.426300000000     1.0000000000
  1 f
0.169000000000     1.0000000000
  1 f
1.0848100000       1.0000000000
  1 f
2.3083704534       1.0000000000
  1 g
0.369300000000     1.0000000000
*
tl def2-ecp
*
  ncore =    60      lmax =    3
#      coefficient  r^n      exponent
f
      15.8254880    2        5.6263990
      21.1040210    2        5.5489520
      2.9151270     2        2.8749460
      3.8969030     2        2.8214510
s-f
      281.2846630    2        12.1678050
      62.4342510    2        8.2949090
      -15.8254880    2        5.6263990
      -21.1040210    2        5.5489520
      -2.9151270     2        2.8749460
      -3.8969030     2        2.8214510
p-f
      4.6334080     2        7.1514920
      9.3417560     2        5.1728650
      72.2992530    2        9.8910720
      144.5580370   2        9.0033910
      -15.8254880    2        5.6263990
      -21.1040210    2        5.5489520
      -2.9151270     2        2.8749460
      -3.8969030     2        2.8214510
d-f
      35.9430390     2        7.1302180
      53.9095930     2        6.9269060
      10.3819390     2        5.4175700
      15.5838220     2        5.1386810
      -15.8254880    2        5.6263990
      -21.1040210    2        5.5489520
      -2.9151270     2        2.8749460
      -3.8969030     2        2.8214510
*
*
pb def2-QZVP
# pb      (17s14p10d4f1g) / [7s6p4d4f1g]      {9131111/731111/7111/1111/1}
*
  9 s
9368.3300000      0.140000000000E-04
1366.9300000      0.103000000000E-03
299.682000000     0.379000000000E-03
34.859700000      0.232740000000E-01
21.788900000      -0.20343600000
13.620000000      0.69921400000

```

|                   |                    |
|-------------------|--------------------|
| 8.5129500000      | -0.60684100000     |
| 5.3033200000      | -0.61139200000     |
| 1.9281600000      | 0.76522700000      |
| 1 s               |                    |
| 1.0373400312      | 1.0000000000       |
| 3 s               |                    |
| 13.559944213      | 0.15955164155      |
| 11.039620045      | -0.26750615828     |
| 2.1371722788      | 0.52500552105      |
| 1 s               |                    |
| 0.51111685694     | 1.0000000000       |
| 1 s               |                    |
| 0.24673987563     | 1.0000000000       |
| 1 s               |                    |
| 0.11577976738     | 1.0000000000       |
| 1 s               |                    |
| 0.52874167812E-01 | 1.0000000000       |
| 7 p               |                    |
| 59.090100000      | 0.71600000000E-03  |
| 20.919700000      | -0.21082000000E-01 |
| 13.077700000      | 0.12706100000      |
| 6.8991000000      | -0.37228400000     |
| 2.1962700000      | 0.43566300000      |
| 1.3048600000      | 0.43573500000      |
| 0.77957200000     | 0.26094700000      |
| 3 p               |                    |
| 9.1373183134      | -0.55319030476E-01 |
| 3.9570574249      | 0.27275707058      |
| 1.2246639098      | 0.72280340692      |
| 1 p               |                    |
| 0.42601564238     | 1.0000000000       |
| 1 p               |                    |
| 0.20378586294     | 1.0000000000       |
| 1 p               |                    |
| 0.88168647885E-01 | 1.0000000000       |
| 1 p               |                    |
| 0.37094701422E-01 | 1.0000000000       |
| 7 d               |                    |
| 66.348248961      | 0.28507140251E-03  |
| 13.455899798      | 0.93352787747E-02  |
| 6.5510273149      | -0.75354763534E-01 |
| 2.6574136949      | 0.16674578725      |
| 1.6001278005      | 0.31208757936      |
| 0.93304454981     | 0.32900401823      |
| 0.54391365526     | 0.22655044022      |
| 1 d               |                    |
| 0.32059545270     | 1.0000000000       |
| 1 d               |                    |
| 0.17922304239     | 1.0000000000       |
| 1 d               |                    |
| 0.83200000000E-01 | 1.0000000000       |
| 1 f               |                    |
| 0.44130000000     | 1.0000000000       |
| 1 f               |                    |
| 0.17820000000     | 1.0000000000       |
| 1 f               |                    |
| 1.1606000000      | 1.0000000000       |
| 1 f               |                    |
| 2.5184938758      | 1.0000000000       |
| 1 g               |                    |

```

0.38810000000      1.0000000000
*
pb def2-ecp
*
ncore =      60      lmax =      3
# coefficient      r^n      exponent
f
      12.2098920      2      3.8875120
      16.1902910      2      3.8119630
s-f
      281.2854990      2      12.2963030
      62.5202170      2      8.6326340
      -12.2098920      2      3.8875120
      -16.1902910      2      3.8119630
p-f
      72.2768970      2      10.2417900
      144.5910830      2      8.9241760
      4.7586930      2      6.5813420
      9.9406210      2      6.2554030
      -12.2098920      2      3.8875120
      -16.1902910      2      3.8119630
d-f
      35.8485070      2      7.7543360
      53.7243420      2      7.7202810
      10.1152560      2      4.9702640
      14.8337310      2      4.5637890
      -12.2098920      2      3.8875120
      -16.1902910      2      3.8119630
*
*
bi def2-QZVP
# bi      (17s14p10d4f1g) / [7s6p4d4f1g]      {9131111/731111/7111/1111/1}
*
9 s
8131.0900000      0.290000000000E-04
1225.7700000      0.200000000000E-03
274.67200000      0.684000000000E-03
37.616400000      0.202180000000E-01
23.480400000      -0.15932600000
14.106500000      0.61172600000
8.8130500000      -0.54465300000
5.5077800000      -0.63688400000
2.0397700000      0.77169800000
1 s
1.0975227257      1.00000000000
3 s
13.614284474      0.15800789319
11.010881766      -0.27164962692
2.2630089550      0.52469330212
1 s
0.52344449532      1.00000000000
1 s
0.26734409206      1.00000000000
1 s
0.12836608814      1.00000000000
1 s
0.60097735551E-01      1.00000000000
7 p
99.591400000      0.346000000000E-03
19.896400000      -0.199760000000E-01

```

|                   |                    |
|-------------------|--------------------|
| 12.437600000      | 0.17544600000      |
| 7.774000000       | -0.37955600000     |
| 4.839950000       | -0.55262000000E-01 |
| 2.254780000       | 0.52888400000      |
| 1.180490000       | 0.52132400000      |
| 3 p               |                    |
| 9.6213214965      | -0.52920356623E-01 |
| 4.1321350830      | 0.26705180214      |
| 1.2785827783      | 0.72824686940      |
| 1 p               |                    |
| 0.59423596262     | 1.00000000000      |
| 1 p               |                    |
| 0.25794168858     | 1.00000000000      |
| 1 p               |                    |
| 0.11273595358     | 1.00000000000      |
| 1 p               |                    |
| 0.47791974731E-01 | 1.00000000000      |
| 7 d               |                    |
| 69.632799181      | 0.35055800732E-03  |
| 14.888614968      | 0.81591735697E-02  |
| 6.5949628713      | -0.83905319526E-01 |
| 4.1796107640      | 0.28034212952E-01  |
| 2.5697950152      | 0.20202314185      |
| 1.5601364822      | 0.33621249652      |
| 0.89210528768     | 0.34629017140      |
| 1 d               |                    |
| 0.48093728228     | 1.00000000000      |
| 1 d               |                    |
| 0.24233621968     | 1.00000000000      |
| 1 d               |                    |
| 0.10440000000     | 1.00000000000      |
| 1 f               |                    |
| 0.48030000000     | 1.00000000000      |
| 1 f               |                    |
| 0.20060000000     | 1.00000000000      |
| 1 f               |                    |
| 1.2625600000      | 1.00000000000      |
| 1 f               |                    |
| 2.7210175470      | 1.00000000000      |
| 1 g               |                    |
| 0.42030000000     | 1.00000000000      |
| *                 |                    |
| bi def2-ecp       |                    |
| *                 |                    |
| ncore = 60        | lmax = 3           |
| # coefficient r^n | exponent           |
| f                 |                    |
| 13.7133830        | 2 4.2145460        |
| 18.1943080        | 2 4.1334000        |
| s-f               |                    |
| 283.2642270       | 2 13.0430900       |
| 62.4719590        | 2 8.2216820        |
| -13.7133830       | 2 4.2145460        |
| -18.1943080       | 2 4.1334000        |
| p-f               |                    |
| 72.0014990        | 2 10.4677770       |
| 144.0022770       | 2 9.1189010        |
| 5.0079450         | 2 6.7547910        |
| 9.9915500         | 2 6.2525920        |
| -13.7133830       | 2 4.2145460        |

```

-18.1943080      2      4.1334000
d-f
  36.3962590      2      8.0814740
  54.5976640      2      7.8905950
   9.9842940      2      4.9555560
  14.9814850      2      4.7045590
 -13.7133830      2      4.2145460
 -18.1943080      2      4.1334000
*
*
po def2-QZVP
# po      (17s14p10d4f1g) / [7s6p4d4f1g]      {9131111/731111/7111/1111/1}
*
  9 s
8913.2900000      0.470000000000E-04
1338.9800000      0.331000000000E-03
299.538000000      0.116100000000E-02
51.148900000      0.789900000000E-02
23.015600000      -0.14934700000
14.376500000      0.63824200000
8.98279000000      -0.61708300000
5.61292000000      -0.60519700000
2.16484000000      0.77608600000
  1 s
1.17538000000      1.00000000000
  3 s
14.787766907      0.15929033129
11.958781204      -0.27310166985
2.4798455066      0.52423698726
  1 s
0.55481477792      1.00000000000
  1 s
0.28581735198      1.00000000000
  1 s
0.13849439468      1.00000000000
  1 s
0.64954523837E-01  1.00000000000
  7 p
113.557000000      0.387000000000E-03
20.363900000      -0.182550000000E-01
12.727400000      0.17477600000
7.94984000000      -0.39870300000
4.96477000000      -0.318120000000E-01
2.30130000000      0.56604700000
1.19545000000      0.51022200000
  3 p
8.46813000000      -0.23853762000
7.7962017000      0.28579119000
0.66871758000      0.46050656000
  1 p
0.59152423927      1.00000000000
  1 p
0.24444843795      1.00000000000
  1 p
0.11018922460      1.00000000000
  1 p
0.48149776000E-01  1.00000000000
  7 d
73.649818245      0.43310334586E-03
16.743441686      0.69436968591E-02

```

```

5.8163048812      -0.83799240387
5.6493757173      0.79372183416
2.4547686106      0.29055549251
1.3909015593      0.38177920670
0.78934505572     0.29342954208
 1 d
0.44107648549     1.00000000000
 1 d
0.23631248810     1.00000000000
 1 d
0.10930000000     1.00000000000
 1 f
0.48940000000     1.00000000000
 1 f
0.20020000000     1.00000000000
 1 f
1.31220000000     1.00000000000
 1 f
2.8220658714      1.00000000000
 1 g
0.40740000000     1.00000000000
*
po def2-ecp
*
ncore =      60          lmax =      3
# coefficient  r^n      exponent
f
      17.4282950      2          5.0132700
      23.3803530      2          4.9846400
      0.1633920      2          1.3267600
      0.3245660      2          1.5287580
s-f
      283.2447060      2          13.2772270
      62.3964610      2          8.3995180
      -17.4282950      2          5.0132700
      -23.3803530      2          4.9846400
      -0.1633920      2          1.3267600
      -0.3245660      2          1.5287580
p-f
      71.9917160      2          10.6656820
      143.9718710      2          9.2837530
      4.9496150      2          6.8727490
      9.7404990      2          6.3261500
      -17.4282950      2          5.0132700
      -23.3803530      2          4.9846400
      -0.1633920      2          1.3267600
      -0.3245660      2          1.5287580
d-f
      36.3783830      2          8.2148660
      54.5627150      2          8.0086960
      9.8894990      2          5.0552270
      14.6938770      2          4.7825530
      -17.4282950      2          5.0132700
      -23.3803530      2          4.9846400
      -0.1633920      2          1.3267600
      -0.3245660      2          1.5287580
*
*
at def2-QZVP
# at      (17s14p10d4f1g) / [7s6p4d4f1g]      {9131111/731111/7111/1111/1}

```

\*

|                   |                     |
|-------------------|---------------------|
| 9 s               |                     |
| 9090.2800000      | 0.350000000000E-04  |
| 1373.0700000      | 0.242000000000E-03  |
| 307.9500000       | 0.815000000000E-03  |
| 48.017600000      | 0.846500000000E-02  |
| 23.909900000      | -0.14733300000      |
| 14.933400000      | 0.63241500000       |
| 9.3317100000      | -0.61640600000      |
| 5.8320600000      | -0.61925800000      |
| 2.2878700000      | 0.78512400000       |
| 1 s               |                     |
| 1.2537238008      | 1.00000000000       |
| 3 s               |                     |
| 14.805780876      | 0.15771473639       |
| 11.855783628      | -0.28007490839      |
| 2.5818782360      | 0.52359428906       |
| 1 s               |                     |
| 0.61460691976     | 1.00000000000       |
| 1 s               |                     |
| 0.31486716636     | 1.00000000000       |
| 1 s               |                     |
| 0.15441669153     | 1.00000000000       |
| 1 s               |                     |
| 0.72866424566E-01 | 1.00000000000       |
| 7 p               |                     |
| 124.60200000      | 0.468000000000E-03  |
| 20.889900000      | -0.161240000000E-01 |
| 13.058500000      | 0.17119600000       |
| 8.1606100000      | -0.40887500000      |
| 5.0980800000      | -0.164070000000E-01 |
| 2.3787600000      | 0.58817200000       |
| 1.2375500000      | 0.50099700000       |
| 3 p               |                     |
| 8.7977584321      | -0.23832810213      |
| 8.0996431502      | 0.28585830834       |
| 0.67629719775     | 0.46050935965       |
| 1 p               |                     |
| 0.60785017930     | 1.00000000000       |
| 1 p               |                     |
| 0.26116561417     | 1.00000000000       |
| 1 p               |                     |
| 0.11948611257     | 1.00000000000       |
| 1 p               |                     |
| 0.52899086095E-01 | 1.00000000000       |
| 7 d               |                     |
| 76.152584155      | 0.54645145370E-03   |
| 17.982092186      | 0.70498116717E-02   |
| 5.8900316564      | -0.59711331046      |
| 5.6001503121      | 0.56517203927       |
| 2.4782622062      | 0.32344318344       |
| 1.3928750256      | 0.39511263456       |
| 0.78560551382     | 0.27094838862       |
| 1 d               |                     |
| 0.44173978741     | 1.00000000000       |
| 1 d               |                     |
| 0.24984733563     | 1.00000000000       |
| 1 d               |                     |
| 0.12700000000     | 1.00000000000       |
| 1 f               |                     |



```

0.538900000000      1.0000000000
  1 f
0.228700000000      1.0000000000
  1 f
1.423720000000      1.0000000000
  1 f
  3.0086421207      1.0000000000
  1 g
0.436300000000      1.0000000000
*
at def2-ecp
*
  ncore =      60      lmax =      3
#      coefficient      r^n      exponent
f
      19.8701980      2      5.8121630
      26.4164520      2      5.7537150
      0.9949700      2      2.5134720
      1.4907010      2      2.5362610
s-f
      49.9571580      2      30.2008320
      283.2103710      2      13.6123060
      62.2810520      2      8.5293400
      -19.8701980      2      5.8121630
      -26.4164520      2      5.7537150
      -0.9949700      2      2.5134720
      -1.4907010      2      2.5362610
p-f
      71.9823710      2      10.8540650
      143.9035320      2      9.4682290
      4.8717590      2      7.0311140
      8.9830590      2      6.1438580
      -19.8701980      2      5.8121630
      -26.4164520      2      5.7537150
      -0.9949700      2      2.5134720
      -1.4907010      2      2.5362610
d-f
      36.3632370      2      8.3135150
      54.5489700      2      7.9989650
      9.7762850      2      5.1799660
      14.2647550      2      4.9422260
      -19.8701980      2      5.8121630
      -26.4164520      2      5.7537150
      -0.9949700      2      2.5134720
      -1.4907010      2      2.5362610
*
*
rn def2-QZVP
# rn      (17s14p11d4f1g) / [7s6p4d4f1g]      {9131111/731111/8111/1111/1}
*
  9 s
12715.600000      0.470000000000E-04
1913.300000      0.338000000000E-03
429.95600000      0.128000000000E-02
100.97800000      0.278200000000E-02
24.4708000000      -0.100421000000
15.2922000000      0.539824000000
9.5548300000      -0.573856000000
5.9666100000      -0.610000000000
2.3893900000      0.793253000000

```

|                   |                    |
|-------------------|--------------------|
| 1 s               |                    |
| 1.3276477516      | 1.0000000000       |
| 3 s               |                    |
| 17.195195341      | 0.16333005101      |
| 14.230303720      | -0.27167744770     |
| 3.0760339153      | 0.52372666490      |
| 1 s               |                    |
| 0.69973866760     | 1.0000000000       |
| 1 s               |                    |
| 0.33174234887     | 1.0000000000       |
| 1 s               |                    |
| 0.16093431878     | 1.0000000000       |
| 1 s               |                    |
| 0.75883596172E-01 | 1.0000000000       |
| 7 p               |                    |
| 131.70800000      | 0.58500000000E-03  |
| 21.401600000      | -0.14438000000E-01 |
| 13.382600000      | 0.17009500000      |
| 8.3688000000      | -0.42250400000     |
| 5.2294500000      | -0.17190000000E-02 |
| 2.4768500000      | 0.60115800000      |
| 1.3018000000      | 0.49278000000      |
| 3 p               |                    |
| 9.0768547920      | -0.23950411879     |
| 8.3822367043      | 0.28554010268      |
| 0.70618692299     | 0.46017587936      |
| 1 p               |                    |
| 0.64553860374     | 1.0000000000       |
| 1 p               |                    |
| 0.28380500916     | 1.0000000000       |
| 1 p               |                    |
| 0.13160518578     | 1.0000000000       |
| 1 p               |                    |
| 0.58958259826E-01 | 1.0000000000       |
| 8 d               |                    |
| 183.73000000      | 0.12900000000E-03  |
| 54.689700000      | 0.94900000000E-03  |
| 16.425500000      | 0.10100000000E-01  |
| 7.3050000000      | -0.87309000000E-01 |
| 4.2747700000      | 0.71452000000E-01  |
| 2.6114200000      | 0.29537800000      |
| 1.5667400000      | 0.35873100000      |
| 0.96097900000     | 0.25612000000      |
| 1 d               |                    |
| 0.59653500000     | 1.0000000000       |
| 1 d               |                    |
| 0.34202800000     | 1.0000000000       |
| 1 d               |                    |
| 0.15160000000     | 1.0000000000       |
| 1 f               |                    |
| 0.59400000000     | 1.0000000000       |
| 1 f               |                    |
| 0.26840000000     | 1.0000000000       |
| 1 f               |                    |
| 1.5556400000      | 1.0000000000       |
| 1 f               |                    |
| 3.2498641894      | 1.0000000000       |
| 1 g               |                    |
| 0.47630000000     | 1.0000000000       |

\*

rn def2-ecp

```
*
ncore = 60          lmax = 3
# coefficient      r^n      exponent
f
    21.7972900      2          6.3485710
    28.9468050      2          6.2959490
    1.4473650       2          2.8821180
    2.1779640       2          2.9080480
s-f
    49.9655510      2          30.1512420
    283.0700000     2          14.5212410
    62.0028700      2          8.0520380
    -21.7972900     2          6.3485710
    -28.9468050     2          6.2959490
    -1.4473650      2          2.8821180
    -2.1779640      2          2.9080480
p-f
    71.9691190      2          11.0099420
    143.8605590     2          9.6176250
    4.7147610       2          7.3360080
    9.0130650       2          6.4062530
    -21.7972900     2          6.3485710
    -28.9468050     2          6.2959490
    -1.4473650      2          2.8821180
    -2.1779640      2          2.9080480
d-f
    36.3683650      2          8.3692200
    54.5517610      2          8.1169750
    9.6344870       2          5.3536560
    14.3879020      2          5.0972120
    -21.7972900     2          6.3485710
    -28.9468050     2          6.2959490
    -1.4473650      2          2.8821180
    -2.1779640      2          2.9080480
```

```
*
=====
def2-QZVPP
=====
```

```
*
h def2-QZVPP
# h      (7s3p2d1f) / [4s3p2d1f]      {4111/111/11/1}
*
```

```
4 s
190.69169000      0.70815167000E-03
28.605532000      0.54678827000E-02
6.5095943000      0.27966605000E-01
1.8412455000      0.10764538000
1 s
0.59853725000      1.00000000000
1 s
0.21397624000      1.00000000000
1 s
0.80316286000E-01  1.00000000000
1 p
2.29200000000      1.00000000000
1 p
0.83800000000      1.00000000000
1 p
0.29200000000      1.00000000000
```

```

1 d
2.0620000000      1.0000000000
1 d
0.662000000000   1.0000000000
1 f
1.3970000000     1.0000000000
*
*
he def2-QZVPP
# he      (8s3p2d1f) / [4s3p2d1f]      {5111/111/11/1}
*
5 s
1144.6470809     0.35861578618E-03
171.64596667     0.27725434466E-02
39.066056254     0.14241892216E-01
11.051401989     0.55457352277E-01
3.5725574473     0.16170511810
1 s
1.2429415962     0.33177883833
1 s
0.44807668730   0.42014033068
1 s
0.16411579128   0.18652273014
1 p
5.9940000000    1.0000000000
1 p
1.7450000000    1.0000000000
1 p
0.56000000000   1.0000000000
1 d
4.2990000000    1.0000000000
1 d
1.2230000000    1.0000000000
1 f
2.6800000000    1.0000000000
*
*
li def2-QZVPP
# li      (15s6p2d1f) / [6s4p2d1f]      {921111/3111/11/1}
*
9 s
14853.977085     0.42711388815E-04
2225.2236477     0.33235310800E-03
504.88739008     0.17518436649E-02
142.45847548     0.73477995850E-02
46.315599580     0.25899837683E-01
16.655335474     0.76670682431E-01
6.4331186199     0.18276075765
2.6027043858     0.32655434038
1.0897245405     0.37000429828
2 s
4.4236595971     0.11120987921
1.2356394990     0.79987335862
1 s
0.46067470602    1.0000000000
1 s
0.96617166955E-01 1.0000000000
1 s
0.45915452296E-01 1.0000000000
1 s

```

```

0.21140048730E-01  1.0000000000
  3 p
  3.2605109206      0.86504749023E-02
0.65003043115      0.47614123736E-01
0.16941671073      0.21001138000
  1 p
0.55732343767E-01  1.0000000000
  1 p
0.20489959241E-01  1.0000000000
  1 p
  3.3270000000      1.0000000000
  1 d
0.23000000000      1.0000000000
  1 d
0.75700000000E-01  1.0000000000
  1 f
0.13500000000      1.0000000000
*
*
be def2-QZVPP
# be      (15s7p2d1f) / [7s4p2d1f]      {8211111/4111/11/1}
*
  8 s
  29646.704407      0.37943320869E-04
  4428.7614354      0.29605352634E-03
  1005.4701332      0.15572477356E-02
  284.15339578      0.65323195769E-02
  92.504356461      0.23116861005E-01
  33.311016058      0.69458515249E-01
  12.911553314      0.17014371331
  5.2665497361      0.31682711374
  2 s
  22.995386380      0.81791122747E-01
  6.6236354176      0.80000038023
  1 s
  2.2289595003      1.0000000000
  1 s
0.95302433451      1.0000000000
  1 s
0.24651602436      1.0000000000
  1 s
0.10153895315      1.0000000000
  1 s
0.41551374604E-01  1.0000000000
  4 p
  14.099789445      0.38508871145E-02
  3.1803188482      0.24152380771E-01
0.90489220496      0.97926925156E-01
0.30411585508      0.29470380030
  1 p
0.11302606657      1.0000000000
  1 p
0.42831733691E-01  1.0000000000
  1 p
  6.4000000000      1.0000000000
  1 d
0.36000000000      1.0000000000
  1 d
0.90000000000E-01  1.0000000000
  1 f

```

```

0.290000000000      1.0000000000
*
*
b def2-QZVPP
# b      (15s8p3d2f1g) / [7s4p3d2f1g]      {8211111/5111/111/11/1}
*
      8 s
46447.667056      0.38388681014E-04
6957.6889042      0.29836770197E-03
1583.4428403      0.15645478806E-02
448.46601009      0.65476770742E-02
146.28639262      0.23139008388E-01
52.784386084      0.69615799357E-01
20.519396170      0.17119636876
8.4185659258      0.31913191837
      2 s
36.510018312      0.78990617244E-01
10.541854005      0.78926384265
      1 s
3.6004091387      1.0000000000
      1 s
1.5617023749      1.0000000000
      1 s
0.44997370775      1.0000000000
      1 s
0.18075230237      1.0000000000
      1 s
0.71596696319E-01  1.0000000000
      5 p
72.240462760      0.86539170411E-03
16.807707208      0.68762067365E-02
5.2259410747      0.30976687148E-01
1.8508350671      0.10432357913
0.72206782663      0.26164137577
      1 p
0.29491018056      1.0000000000
      1 p
0.12201141839      1.0000000000
      1 p
0.49865393625E-01  1.0000000000
      1 d
1.1100000000      1.0000000000
      1 d
0.4020000000      1.0000000000
      1 d
0.1450000000      1.0000000000
      1 f
0.8820000000      1.0000000000
      1 f
0.3110000000      1.0000000000
      1 g
0.6730000000      1.0000000000
*
*
c def2-QZVPP
# c      (15s8p3d2f1g) / [7s4p3d2f1g]      {8211111/5111/111/11/1}
*
      8 s
67025.071029      0.38736308501E-04
10039.986538      0.30107917575E-03

```

|                                  |                          |
|----------------------------------|--------------------------|
| 2284.9316911                     | 0.15787918095E-02        |
| 647.14122130                     | 0.66087087195E-02        |
| 211.09472335                     | 0.23367123250E-01        |
| 76.177643862                     | 0.70420716898E-01        |
| 29.633839163                     | 0.17360344953            |
| 12.187785081                     | 0.32292305648            |
| 2 s                              |                          |
| 53.026006299                     | 0.74897404492E-01        |
| 15.258502776                     | 0.76136220983            |
| 1 s                              |                          |
| 5.2403957464                     | 1.0000000000             |
| 1 s                              |                          |
| 2.2905022379                     | 1.0000000000             |
| 1 s                              |                          |
| 0.69673283006                    | 1.0000000000             |
| 1 s                              |                          |
| 0.27599337363                    | 1.0000000000             |
| 1 s                              |                          |
| 0.10739884389                    | 1.0000000000             |
| 5 p                              |                          |
| 105.12555082                     | 0.84647553844E-03        |
| 24.884461066                     | 0.66274038534E-02        |
| 7.8637230826                     | 0.30120390419E-01        |
| 2.8407001835                     | 0.99951435476E-01        |
| 1.1227137335                     | 0.23826299282            |
| 1 p                              |                          |
| 0.46050725555                    | 1.0000000000             |
| 1 p                              |                          |
| 0.18937530913                    | 1.0000000000             |
| 1 p                              |                          |
| 0.75983791611E-01                | 1.0000000000             |
| 1 d                              |                          |
| 1.8480000000                     | 1.0000000000             |
| 1 d                              |                          |
| 0.64900000000                    | 1.0000000000             |
| 1 d                              |                          |
| 0.22800000000                    | 1.0000000000             |
| 1 f                              |                          |
| 1.4190000000                     | 1.0000000000             |
| 1 f                              |                          |
| 0.48500000000                    | 1.0000000000             |
| 1 g                              |                          |
| 1.0110000000                     | 1.0000000000             |
| *                                |                          |
| *                                |                          |
| n def2-QZVPP                     |                          |
| # n (15s8p3d2f1g) / [7s4p3d2f1g] | {82111111/5111/111/11/1} |
| *                                |                          |
| 8 s                              |                          |
| 90726.889210                     | 0.39257887368E-04        |
| 13590.528801                     | 0.30513316455E-03        |
| 3092.9883781                     | 0.16000560446E-02        |
| 875.99876362                     | 0.66982937306E-02        |
| 285.74469982                     | 0.23690078765E-01        |
| 103.11913417                     | 0.71455405268E-01        |
| 40.128556777                     | 0.17632774876            |
| 16.528095704                     | 0.32677592815            |
| 2 s                              |                          |
| 69.390960983                     | 0.80052094386E-01        |
| 20.428200596                     | 0.78268063538            |

```

1 s
7.1292587972      1.0000000000
1 s
3.1324304893      1.0000000000
1 s
0.98755778723     1.0000000000
1 s
0.38765721307     1.0000000000
1 s
0.14909883075     1.0000000000
5 p
150.05742670      -0.86216165986E-03
35.491599483      -0.68571273236E-02
11.247864223      -0.31795688855E-01
4.0900305195      -0.10537396822
1.6220573146      -0.24519708041
1 p
0.66442261530     1.0000000000
1 p
0.27099770070     1.0000000000
1 p
0.10688749984     1.0000000000
1 d
2.83700000000     1.0000000000
1 d
0.96800000000     1.0000000000
1 d
0.33500000000     1.0000000000
1 f
2.02700000000     1.0000000000
1 f
0.68500000000     1.0000000000
1 g
1.42700000000     1.0000000000
*
*
o def2-QZVPP
# o      (15s8p3d2f1g) / [7s4p3d2f1g]      {8211111/5111/111/11/1}
*
8 s
116506.46908      0.40383857939E-04
17504.349724      0.31255139004E-03
3993.4513230      0.16341473495E-02
1133.0063186      0.68283224757E-02
369.99569594      0.24124410221E-01
133.62074349      0.72730206154E-01
52.035643649      0.17934429892
21.461939313      0.33059588895
2 s
89.835051252      0.96468652996E-01
26.428010844      0.94117481120
1 s
9.2822824649      1.0000000000
1 s
4.0947728533      1.0000000000
1 s
1.3255349078      1.0000000000
1 s
0.51877230787     1.0000000000
1 s

```



|                                  |                   |                         |
|----------------------------------|-------------------|-------------------------|
| 0.19772676454                    | 1.0000000000      |                         |
| 5 p                              |                   |                         |
| 191.15255810                     | 0.25115697705E-02 |                         |
| 45.233356739                     | 0.20039240864E-01 |                         |
| 14.353465922                     | 0.93609064762E-01 |                         |
| 5.2422371832                     | 0.30618127124     |                         |
| 2.0792418599                     | 0.67810501439     |                         |
| 1 p                              |                   |                         |
| 0.84282371424                    | 1.0000000000      |                         |
| 1 p                              |                   |                         |
| 0.33617694891                    | 1.0000000000      |                         |
| 1 p                              |                   |                         |
| 0.12863997974                    | 1.0000000000      |                         |
| 1 d                              |                   |                         |
| 3.7750000000                     | 1.0000000000      |                         |
| 1 d                              |                   |                         |
| 1.3000000000                     | 1.0000000000      |                         |
| 1 d                              |                   |                         |
| 0.44400000000                    | 1.0000000000      |                         |
| 1 f                              |                   |                         |
| 2.6660000000                     | 1.0000000000      |                         |
| 1 f                              |                   |                         |
| 0.85900000000                    | 1.0000000000      |                         |
| 1 g                              |                   |                         |
| 1.8460000000                     | 1.0000000000      |                         |
| *                                |                   |                         |
| *                                |                   |                         |
| f def2-QZVPP                     |                   |                         |
| # f (15s8p3d2f1g) / [7s4p3d2f1g] |                   | {8211111/5111/111/11/1} |
| *                                |                   |                         |
| 8 s                              |                   |                         |
| 132535.97345                     | 0.47387482743E-04 |                         |
| 19758.112588                     | 0.37070120897E-03 |                         |
| 4485.1996947                     | 0.19450784713E-02 |                         |
| 1273.8151020                     | 0.80573291994E-02 |                         |
| 418.93831236                     | 0.27992880781E-01 |                         |
| 152.55721985                     | 0.82735120175E-01 |                         |
| 59.821524823                     | 0.19854169012     |                         |
| 24.819076932                     | 0.34860632233     |                         |
| 2 s                              |                   |                         |
| 100.74446673                     | 0.10505068816     |                         |
| 30.103728290                     | 0.94068472434     |                         |
| 1 s                              |                   |                         |
| 10.814283272                     | 1.0000000000      |                         |
| 1 s                              |                   |                         |
| 4.8172886770                     | 1.0000000000      |                         |
| 1 s                              |                   |                         |
| 1.6559334213                     | 1.0000000000      |                         |
| 1 s                              |                   |                         |
| 0.64893519582                    | 1.0000000000      |                         |
| 1 s                              |                   |                         |
| 0.24778104545                    | 1.0000000000      |                         |
| 5 p                              |                   |                         |
| 240.96654114                     | 0.30389933451E-02 |                         |
| 57.020699781                     | 0.24357738582E-01 |                         |
| 18.126952120                     | 0.11442925768     |                         |
| 6.6457404621                     | 0.37064659853     |                         |
| 2.6375722892                     | 0.79791551766     |                         |
| 1 p                              |                   |                         |
| 1.0638217200                     | 1.0000000000      |                         |

```

1 p
0.41932562750      1.0000000000
1 p
0.15747588299      1.0000000000
1 d
5.0140000000       1.0000000000
1 d
1.7250000000       1.0000000000
1 d
0.586000000000    1.0000000000
1 f
3.5620000000       1.0000000000
1 f
1.1480000000       1.0000000000
1 g
2.3760000000       1.0000000000
*
*
ne def2-QZVPP
# ne      (15s9p3d2f1g) / [7s4p3d2f1g]      {82111111/6111/111/11/1}
*
8 s
160676.27955       0.47387482743E-04
23953.195039       0.37070120897E-03
5437.5063711       0.19450784713E-02
1544.2741024       0.80573291994E-02
507.88814269       0.27992880781E-01
184.94847750       0.82735120175E-01
72.522952039       0.19854169012
30.088713575       0.34860632233
2 s
120.68434940       0.10400597014
36.074294857       0.91999988986
1 s
13.052091210       1.0000000000
1 s
5.7974783353       1.0000000000
1 s
2.0478626895       1.0000000000
1 s
0.80214571994       1.0000000000
1 s
0.30548672205       1.0000000000
6 p
498.43397466       0.43118261050E-03
118.14109217       0.36206397703E-02
38.032529735       0.18245344081E-01
14.183731950       0.65133035572E-01
5.7864190721       0.16708915089
2.4599622160       0.29268019613
1 p
1.0421999498       1.0000000000
1 p
0.42987748916       1.0000000000
1 p
0.16889708453       1.0000000000
1 d
6.4710000000       1.0000000000
1 d
2.2130000000       1.0000000000

```

```

1 d
0.74700000000 1.0000000000
1 f
4.65700000000 1.0000000000
1 f
1.52400000000 1.0000000000
1 g
2.98300000000 1.0000000000
*
*
na def2-QZVPP
# na (20s12p4d2f) / [9s5p4d2f] {(10)31111111/81111/1111/11}
*
10 s
379852.20081 0.20671384468E-04
56886.006378 0.16070466617E-03
12942.701838 0.84462905848E-03
3664.3017904 0.35519026029E-02
1194.7417499 0.12754034468E-01
430.98192917 0.39895462742E-01
167.83169424 0.10720154498
69.306669040 0.23339516913
29.951170886 0.36333077287
13.380791097 0.30544770974
3 s
121.74011283 0.36142427284E-01
37.044143387 0.28820961687
13.995422624 0.79337384869
1 s
5.9827797428 1.0000000000
1 s
2.4830455118 1.0000000000
1 s
1.0452506187 1.0000000000
1 s
0.43875640383 1.0000000000
1 s
0.65595633185E-01 1.0000000000
1 s
0.30561925072E-01 1.0000000000
1 s
0.15509064018E-01 1.0000000000
8 p
690.77627017 0.37478518415E-03
163.82806121 0.31775441030E-02
52.876460769 0.16333581338E-01
19.812270493 0.59754902585E-01
8.1320378784 0.15879328812
3.4969068377 0.29049363260
1.5117244146 0.36368131139
0.64479294912 0.28195867334
1 p
0.26145823312 1.0000000000
1 p
0.11704726116 1.0000000000
1 p
0.40494747666E-01 1.0000000000
1 p
0.15666707355E-01 1.0000000000
1 d

```

```

5.3000000000      1.0000000000
 1 d
1.5900000000      1.0000000000
 1 d
0.2300000000      1.0000000000
 1 d
0.7570000000E-01  1.0000000000
 1 f
4.2700000000      1.0000000000
 1 f
0.1350000000      1.0000000000
*
*
mg def2-QZVPP
# mg      (20s12p5d2f) / [9s5p5d2f]      {(10)31111111/81111/11111/11}
*
10 s
605967.78753      0.14430176617E-04
90569.094692      0.11249871807E-03
20574.252844      0.59264972450E-03
5818.6284865      0.24988770424E-02
1895.6296075      0.90230775141E-02
683.45941021      0.28579919806E-01
266.18219762      0.79064453923E-01
110.11220010      0.18269337814
47.777041234      0.32157193967
21.542166149      0.35028259389
 3 s
174.12136378      0.22931111278E-01
53.484972498      0.19151777552
20.500213307      0.61155711055
 1 s
9.8056826922      1.0000000000
 1 s
3.5402989348      1.0000000000
 1 s
1.5450850046      1.0000000000
 1 s
0.66540195432      1.0000000000
 1 s
0.14355439071      1.0000000000
 1 s
0.66624673468E-01  1.0000000000
 1 s
0.29772648266E-01  1.0000000000
 8 p
893.20460829      0.34958267428E-03
211.78258286      0.29811890111E-02
68.443200537      0.15517845758E-01
25.727265349      0.57578659557E-01
10.606634281      0.15610307853
4.5934126484      0.29230912580
2.0100469807      0.37219024072
0.87384841536      0.27578088891
 1 p
0.35615076666      1.0000000000
 1 p
0.18995954356      1.0000000000
 1 p
0.74580135669E-01  1.0000000000

```

```

1 p
0.29221641309E-01 1.0000000000
1 d
6.9300000000 1.0000000000
1 d
2.1000000000 1.0000000000
1 d
0.6500000000 1.0000000000
1 d
0.2000000000 1.0000000000
1 d
0.5200000000E-01 1.0000000000
1 f
5.6000000000 1.0000000000
1 f
0.1600000000 1.0000000000
*
*
al def2-QZVPP
# al (20s14p4d2f1g) / [9s6p4d2f1g] {(10)}
31111111/821111/1111/11/1}
*
10 s
754550.78265 0.13421335886E-04
112999.38922 0.10433210786E-03
25715.831759 0.54841772080E-03
7283.6030283 0.23089081391E-02
2376.0008796 0.83309974593E-02
857.65468087 0.26417963653E-01
334.38922598 0.73443646426E-01
138.48504731 0.17184039139
60.150368808 0.31041980030
27.127610860 0.35669190596
3 s
225.36500065 0.21522039783E-01
69.341968124 0.18531780493
26.619335712 0.63533181245
1 s
12.349420671 1.0000000000
1 s
4.5878785994 1.0000000000
1 s
2.0571338103 1.0000000000
1 s
0.90864549395 1.0000000000
1 s
0.24226988038 1.0000000000
1 s
0.11248136869 1.0000000000
1 s
0.48156492817E-01 1.0000000000
8 p
1489.6119522 0.20177122443E-03
353.01399267 0.17508109203E-02
114.40764069 0.94424704664E-02
43.312186111 0.36868004006E-01
18.027322216 0.10892874007
7.9675432403 0.23265901004
3.6090399541 0.34643587076
1.6456081630 0.33440809866

```

```

2 p
34.731187489      0.17823073020E-01
1.2553083630     -0.59991263926
1 p
0.73635534282    1.00000000000
1 p
0.24686465559    1.00000000000
1 p
0.94821971828E-01 1.00000000000
1 p
0.36214165654E-01 1.00000000000
1 d
1.97000000000    1.00000000000
1 d
0.43700000000    1.00000000000
1 d
0.19500000000    1.00000000000
1 d
0.80000000000E-01 1.00000000000
1 f
0.15400000000    1.00000000000
1 f
0.40100000000    1.00000000000
1 g
0.35700000000    1.00000000000
*
*
si def2-QZVPP
# si      (20s14p4d2f1g) / [9s6p4d2f1g]      {(10)}
31111111/821111/1111/11/1}
*
10 s
918070.69565      0.12658787192E-04
137485.25386      0.98408387461E-04
31287.772714      0.51731398244E-03
8861.6105697      0.21785441933E-02
2890.6943156      0.78656853716E-02
1043.4063979      0.24987553674E-01
406.80160276      0.69761818844E-01
168.48360207      0.16473362733
73.185628823      0.30285602647
32.998485420      0.36007260439
3 s
278.78751325      0.20185463814E-01
85.910228722      0.17720406747
32.992604031      0.63587860906
1 s
15.033693254      1.00000000000
1 s
5.7257514773      1.00000000000
1 s
2.6146521029      1.00000000000
1 s
1.1757833152      1.00000000000
1 s
0.35432330868      1.00000000000
1 s
0.16248335806      1.00000000000
1 s
0.68332457181E-01 1.00000000000

```

```

      8 p
1775.8850516      0.20186971126E-03
420.83786849     0.17544314655E-02
136.42290243     0.95039532290E-02
51.700991737     0.37325741590E-01
21.559456002     0.11085396329
9.5559200095     0.23756407046
4.3529819473     0.35295783750
2.0096964381     0.32885931947
      2 p
46.418153780     0.25858819154E-01
1.9076417796     -0.59874865899
      1 p
0.92337221587     1.0000000000
      1 p
0.34515720370     1.0000000000
      1 p
0.13656834761     1.0000000000
      1 p
0.52987060586E-01 1.0000000000
      1 d
2.6450000000     1.0000000000
      1 d
0.60800000000     1.0000000000
      1 d
0.27200000000     1.0000000000
      1 d
0.11300000000     1.0000000000
      1 f
0.21200000000     1.0000000000
      1 f
0.54100000000     1.0000000000
      1 g
0.46100000000     1.0000000000
*
*
p def2-QZVPP
# p      (20s14p4d2f1g) / [9s6p4d2f1g]      {(10)
31111111/821111/1111/11/1}
*
      10 s
1090561.7138     0.12142449664E-04
163316.39461     0.94395292614E-04
37166.607451     0.49622262177E-03
10526.880945     0.20900040747E-02
3433.9976028     0.75489230025E-02
1239.5360480     0.24010423937E-01
483.27456199     0.67231473697E-01
200.16911586     0.15978669881
86.960394829     0.29735906782
39.211283369     0.36187171850
      3 s
336.75883662     0.19154721050E-01
103.72179793     0.17134079100
39.771861240     0.63689655985
      1 s
17.888612952     1.0000000000
      1 s
6.9644556879     1.0000000000
      1 s

```

|                                   |                   |        |
|-----------------------------------|-------------------|--------|
| 3.2198092087                      | 1.0000000000      |        |
| 1 s                               |                   |        |
| 1.4669943979                      | 1.0000000000      |        |
| 1 s                               |                   |        |
| 0.47765437532                     | 1.0000000000      |        |
| 1 s                               |                   |        |
| 0.21637789241                     | 1.0000000000      |        |
| 1 s                               |                   |        |
| 0.90235894336E-01                 | 1.0000000000      |        |
| 8 p                               |                   |        |
| 2019.6711374                      | 0.21359172406E-03 |        |
| 478.60125090                      | 0.18568771399E-02 |        |
| 155.14942504                      | 0.10070690115E-01 |        |
| 58.816356575                      | 0.39605153679E-01 |        |
| 24.544512785                      | 0.11736067844     |        |
| 10.883571061                      | 0.24950540642     |        |
| 4.9624791285                      | 0.36421287984     |        |
| 2.3002912343                      | 0.31764127123     |        |
| 2 p                               |                   |        |
| 59.371345016                      | 0.39432918004     |        |
| 3.0694590986                      | -6.3522960431     |        |
| 1 p                               |                   |        |
| 1.0634401739                      | 1.0000000000      |        |
| 1 p                               |                   |        |
| 0.45022152161                     | 1.0000000000      |        |
| 1 p                               |                   |        |
| 0.18267271344                     | 1.0000000000      |        |
| 1 p                               |                   |        |
| 0.71610333771E-01                 | 1.0000000000      |        |
| 1 d                               |                   |        |
| 3.3430000000                      | 1.0000000000      |        |
| 1 d                               |                   |        |
| 0.80700000000                     | 1.0000000000      |        |
| 1 d                               |                   |        |
| 0.36500000000                     | 1.0000000000      |        |
| 1 d                               |                   |        |
| 0.15400000000                     | 1.0000000000      |        |
| 1 f                               |                   |        |
| 0.28000000000                     | 1.0000000000      |        |
| 1 f                               |                   |        |
| 0.70300000000                     | 1.0000000000      |        |
| 1 g                               |                   |        |
| 0.59700000000                     | 1.0000000000      |        |
| *                                 |                   |        |
| *                                 |                   |        |
| s def2-QZVPP                      |                   |        |
| # s (20s14p4d2f1g) / [9s6p4d2f1g] |                   | {(10)} |
| 31111111/821111/1111/11/1}        |                   |        |
| *                                 |                   |        |
| 10 s                              |                   |        |
| 1273410.9023                      | 0.11767088246E-04 |        |
| 190697.83007                      | 0.91478610166E-04 |        |
| 43397.885330                      | 0.48090078640E-03 |        |
| 12291.809677                      | 0.20257193592E-02 |        |
| 4009.7420824                      | 0.73190096406E-02 |        |
| 1447.3531030                      | 0.23300499900E-01 |        |
| 564.30102913                      | 0.65386213610E-01 |        |
| 233.74506243                      | 0.15614449910     |        |
| 101.56402814                      | 0.29318563787     |        |
| 45.805907187                      | 0.36287914289     |        |



|                                    |                    |  |
|------------------------------------|--------------------|--|
| 3 s                                |                    |  |
| 394.27281503                       | 0.18753305081E-01  |  |
| 121.72249591                       | 0.16870726663      |  |
| 46.754125963                       | 0.63806830653      |  |
| 1 s                                |                    |  |
| 20.923008254                       | 1.0000000000       |  |
| 1 s                                |                    |  |
| 8.2685567800                       | 1.0000000000       |  |
| 1 s                                |                    |  |
| 3.8629345671                       | 1.0000000000       |  |
| 1 s                                |                    |  |
| 1.7794684781                       | 1.0000000000       |  |
| 1 s                                |                    |  |
| 0.61064260103                      | 1.0000000000       |  |
| 1 s                                |                    |  |
| 0.27412269445                      | 1.0000000000       |  |
| 1 s                                |                    |  |
| 0.11325939107                      | 1.0000000000       |  |
| 8 p                                |                    |  |
| 2189.8930459                       | 0.23912552864E-03  |  |
| 518.94596592                       | 0.20772032158E-02  |  |
| 168.19560151                       | 0.11242420571E-01  |  |
| 63.745282788                       | 0.44069933941E-01  |  |
| 26.597033077                       | 0.12918778608      |  |
| 11.774251449                       | 0.26910820167      |  |
| 5.3534379024                       | 0.37855928620      |  |
| 2.4701911802                       | 0.29692134655      |  |
| 2 p                                |                    |  |
| 82.120288349                       | -0.39420318847E-01 |  |
| 4.9523532869                       | 0.64048403090      |  |
| 1 p                                |                    |  |
| 1.0828262029                       | 1.0000000000       |  |
| 1 p                                |                    |  |
| 0.49271277356                      | 1.0000000000       |  |
| 1 p                                |                    |  |
| 0.20483450942                      | 1.0000000000       |  |
| 1 p                                |                    |  |
| 0.80743615716E-01                  | 1.0000000000       |  |
| 1 d                                |                    |  |
| 4.1590000000                       | 1.0000000000       |  |
| 1 d                                |                    |  |
| 1.0190000000                       | 1.0000000000       |  |
| 1 d                                |                    |  |
| 0.46400000000                      | 1.0000000000       |  |
| 1 d                                |                    |  |
| 0.19400000000                      | 1.0000000000       |  |
| 1 f                                |                    |  |
| 0.33500000000                      | 1.0000000000       |  |
| 1 f                                |                    |  |
| 0.86900000000                      | 1.0000000000       |  |
| 1 g                                |                    |  |
| 0.68300000000                      | 1.0000000000       |  |
| *                                  |                    |  |
| *                                  |                    |  |
| c1 def2-QZVPP                      |                    |  |
| # c1 (20s14p4d2f1g) / [9s6p4d2f1g] | {(10)              |  |
| 31111111/821111/1111/11/1}         |                    |  |
| *                                  |                    |  |
| 10 s                               |                    |  |
| 1467459.0095                       | 0.11478257194E-04  |  |

|                   |                    |
|-------------------|--------------------|
| 219756.16433      | 0.89234299775E-04  |
| 50010.770301      | 0.46911086186E-03  |
| 14164.823918      | 0.19762446133E-02  |
| 4620.7465525      | 0.71419937783E-02  |
| 1667.8991635      | 0.22753219445E-01  |
| 650.29199265      | 0.63959782953E-01  |
| 269.38037376      | 0.15331059238      |
| 117.06752106      | 0.28986952417      |
| 52.811766843      | 0.36348071452      |
| 3 s               |                    |
| 461.42769988      | 0.18019457578E-01  |
| 142.12665355      | 0.16489442314      |
| 54.437838768      | 0.63891587584      |
| 1 s               |                    |
| 24.160770219      | 1.0000000000       |
| 1 s               |                    |
| 9.7083540306      | 1.0000000000       |
| 1 s               |                    |
| 4.5640696733      | 1.0000000000       |
| 1 s               |                    |
| 2.1194744832      | 1.0000000000       |
| 1 s               |                    |
| 0.75722365394     | 1.0000000000       |
| 1 s               |                    |
| 0.33747224597     | 1.0000000000       |
| 1 s               |                    |
| 0.13860775149     | 1.0000000000       |
| 8 p               |                    |
| 2501.9457890      | 0.24242618410E-03  |
| 592.88059285      | 0.21079961749E-02  |
| 192.18089186      | 0.11432693869E-01  |
| 72.875710488      | 0.44956698060E-01  |
| 30.436358370      | 0.13197476145      |
| 13.490178902      | 0.27493639225      |
| 6.1478071413      | 0.38347236372      |
| 2.8450944820      | 0.28871943885      |
| 2 p               |                    |
| 105.39397936      | -0.34311760144E-01 |
| 6.7369738513      | 0.64060818902      |
| 1 p               |                    |
| 1.2421095772      | 1.0000000000       |
| 1 p               |                    |
| 0.55669714254     | 1.0000000000       |
| 1 p               |                    |
| 0.23387801464     | 1.0000000000       |
| 1 p               |                    |
| 0.93164490890E-01 | 1.0000000000       |
| 1 d               |                    |
| 5.1910000000      | 1.0000000000       |
| 1 d               |                    |
| 1.2760000000      | 1.0000000000       |
| 1 d               |                    |
| 0.5830000000      | 1.0000000000       |
| 1 d               |                    |
| 0.2430000000      | 1.0000000000       |
| 1 f               |                    |
| 0.4230000000      | 1.0000000000       |
| 1 f               |                    |
| 1.0890000000      | 1.0000000000       |
| 1 g               |                    |

```

0.82700000000      1.0000000000
*
*
ar def2-QZVPP
# ar      (20s14p4d2f1g) / [9s6p4d2f1g]      {(10)
31111111/821111/1111/11/1}
*
10 s
1673421.9494      0.11245990413E-04
250601.75373      0.87428115798E-04
57030.912120      0.45961641275E-03
16153.303915      0.19363890742E-02
5269.4109288      0.69994046497E-02
1902.0315541      0.22312068196E-01
741.57677159      0.62808077697E-01
307.20901906      0.15101140997
133.52786203      0.28713661177
60.253381291      0.36385490107
3 s
522.02426206      0.18071323116E-01
161.51290469      0.16449219884
62.126369433      0.63897334899
1 s
27.590930012      1.0000000000
1 s
11.175528881      1.0000000000
1 s
5.2959065137      1.0000000000
1 s
2.4782798895      1.0000000000
1 s
0.91262095059      1.0000000000
1 s
0.40426067549      1.0000000000
1 s
0.16562886306      1.0000000000
8 p
2868.4504581      0.24010435121E-03
679.71869590      0.20904788665E-02
220.36758824      0.11369316839E-01
83.620439734      0.44901977398E-01
34.964322657      0.13237156770
15.525131784      0.27709277600
7.0992979806      0.38613979646
3.3021336602      0.28492925372
2 p
128.78765667      -0.30509457751E-01
8.4357867977      0.64101621070
1 p
1.4618661855      1.0000000000
1 p
0.64658010096      1.0000000000
1 p
0.27229295755      1.0000000000
1 p
0.10905182449      1.0000000000
1 d
6.3150000000      1.0000000000
1 d
1.5620000000      1.0000000000

```

```

1 d
0.71500000000 1.0000000000
1 d
0.29700000000 1.0000000000
1 f
0.54300000000 1.0000000000
1 f
1.3250000000 1.0000000000
1 g
1.0070000000 1.0000000000
*
*
k def2-QZVPP
# k (24s18p4d3f) / [11s6p4d3f] {(11)4111111111/951111/1111/111}
*
11 s
2022075.1391 0.10144874011E-04
303044.65568 0.78783500963E-04
69013.938490 0.41380919674E-03
19559.244615 0.17427571893E-02
6383.8934901 0.63004086126E-02
2305.3502858 0.20125347032E-01
899.14418101 0.56966060520E-01
372.59500133 0.13882654093
161.97635247 0.27132285414
73.085553853 0.36383620662
33.595644762 0.24724464776
4 s
685.49855365 0.44367463797E-02
211.66163373 0.42502718169E-01
80.851405131 0.18467742018
35.108667236 0.29353173891
1 s
14.409437283 1.0000000000
1 s
6.8697147262 1.0000000000
1 s
3.2121883687 1.0000000000
1 s
1.2610484365 1.0000000000
1 s
0.61438946301 1.0000000000
1 s
0.27264370973 1.0000000000
1 s
0.77173005207E-01 1.0000000000
1 s
0.40918397569E-01 1.0000000000
1 s
0.17055762425E-01 1.0000000000
9 p
3469.6649718 0.21340225970E-03
822.02356107 0.18637844836E-02
266.58406636 0.10211431546E-01
101.28048161 0.40799604728E-01
42.429490761 0.12257473393
18.912083912 0.26405833679
8.7017779030 0.38227164575
4.0854567599 0.29998812383
1.8667286060 0.78007265591E-01

```

```

5 p
27.544639057 -0.58222994163E-02
9.2098893609 -0.26787531329E-01
1.7232877425 0.30666847665
0.77969303735 0.66927944165
0.34379047862 0.60376468615
1 p
0.14346681918 1.0000000000
1 p
0.68000000000E-01 1.0000000000
1 p
0.32000000000E-01 1.0000000000
1 p
0.15300000000E-01 1.0000000000
1 d
1.7000000000 1.0000000000
1 d
0.5100000000 1.0000000000
1 d
0.1800000000 1.0000000000
1 d
0.54000000000E-01 1.0000000000
1 f
2.3700000000 1.0000000000
1 f
0.7900000000 1.0000000000
1 f
0.90000000000E-01 1.0000000000
*
*
ca def2-QZVPP
# ca (24s18p6d3f) / [11s6p4d3f] {(11)4111111111/951111/3111/111}
*
11 s
2433075.4304 0.91625196182E-05
364160.43015 0.71271617974E-04
82898.747637 0.37433706369E-03
23499.730540 0.15762862250E-02
7671.2245985 0.57026102580E-02
2770.2330687 0.18255738108E-01
1080.6807550 0.51906421035E-01
448.04894531 0.12791238579
194.92007727 0.25586635231
88.039793338 0.36028678275
40.645696719 0.26838462020
4 s
779.53331918 -0.18403005509E-01
241.18856300 -0.17649440544
92.403869324 -0.77662799584
39.786090342 -1.3352155444
1 s
18.195864278 1.0000000000
1 s
8.3321457067 1.0000000000
1 s
3.9190196209 1.0000000000
1 s
1.6667099493 1.0000000000
1 s
0.80891084908 1.0000000000

```

```

1 s
0.36174199934      1.0000000000
1 s
0.82379874526E-01  1.0000000000
1 s
0.47947864375E-01  1.0000000000
1 s
0.22308112408E-01  1.0000000000
9 p
4064.2232796      0.19780891021E-03
962.91550624      0.17307465902E-02
312.34501046      0.95298721105E-02
118.76056036      0.38387459783E-01
49.816153133      0.11679256218
22.259679401      0.25637225097
10.286094124      0.37986193747
4.8606982416      0.30805760637
2.2525682942      0.85755999942E-01
5 p
31.467555443      -0.42441487483E-02
10.657589056      -0.19579425947E-01
2.0505555426      0.21237507422
0.94362089228      0.46277871121
0.42709067504      0.39177495728
1 p
0.17788187209      1.0000000000
1 p
0.86000000000E-01  1.0000000000
1 p
0.41500000000E-01  1.0000000000
1 p
0.20000000000E-01  1.0000000000
3 d
16.924012098      0.35543971560E-01
4.4655403330      0.18133698335
1.4347576200      0.48002060116
1 d
0.46552376784      1.0000000000
1 d
0.14097711082      1.0000000000
1 d
0.41467009281E-01  1.0000000000
1 f
2.6500000000      1.0000000000
1 f
0.79400000000      1.0000000000
1 f
0.13000000000      1.0000000000
*
*
sc def2-QZVPP
# sc      (24s18p9d3f2g) / [11s6p5d3f2g]      {(11)}
4111111111/951111/51111/111/11}
*
11 s
2855231.1264      0.84862794535E-05
427433.34221      0.65998092974E-04
97233.218545      0.34740968058E-03
27496.222846      0.14694099525E-02
8948.7324409      0.53410667286E-02

```

|                   |                    |
|-------------------|--------------------|
| 3221.0397292      | 0.17200652511E-01  |
| 1252.0534077      | 0.49287065332E-01  |
| 517.26093376      | 0.12273534550      |
| 224.33127242      | 0.24910183844      |
| 101.10551671      | 0.35884366997      |
| 46.684957855      | 0.27782811319      |
| 4 s               |                    |
| 947.75965484      | 0.36123019249E-02  |
| 293.07262846      | 0.35616224567E-01  |
| 111.70230657      | 0.16664064248      |
| 47.756215212      | 0.32531051399      |
| 1 s               |                    |
| 21.121984009      | 1.0000000000       |
| 1 s               |                    |
| 9.7765922198      | 1.0000000000       |
| 1 s               |                    |
| 4.5982699340      | 1.0000000000       |
| 1 s               |                    |
| 1.9928487767      | 1.0000000000       |
| 1 s               |                    |
| 0.95939954457     | 1.0000000000       |
| 1 s               |                    |
| 0.42566790070     | 1.0000000000       |
| 1 s               |                    |
| 0.98132196006E-01 | 1.0000000000       |
| 1 s               |                    |
| 0.56894222237E-01 | 1.0000000000       |
| 1 s               |                    |
| 0.25369907195E-01 | 1.0000000000       |
| 9 p               |                    |
| 4611.4680242      | 0.19180655992E-03  |
| 1092.4666458      | 0.16801897753E-02  |
| 354.41923265      | 0.92763338425E-02  |
| 134.83390286      | 0.37537202735E-01  |
| 56.610873926      | 0.11493045217      |
| 25.336605518      | 0.25446811084      |
| 11.741313238      | 0.37993352765      |
| 5.5697268625      | 0.30948776388      |
| 2.5949954062      | 0.86972259257E-01  |
| 5 p               |                    |
| 35.951198081      | -0.55780446917E-02 |
| 12.301020232      | -0.25933825208E-01 |
| 2.3876557755      | 0.27489094204      |
| 1.1031823600      | 0.59208047142      |
| 0.50008479496     | 0.49113471853      |
| 1 p               |                    |
| 0.20796508799     | 1.0000000000       |
| 1 p               |                    |
| 0.10100000000     | 1.0000000000       |
| 1 p               |                    |
| 0.48000000000E-01 | 1.0000000000       |
| 1 p               |                    |
| 0.23000000000E-01 | 1.0000000000       |
| 5 d               |                    |
| 73.531179748      | 0.22506354976E-02  |
| 21.764759639      | 0.16377610133E-01  |
| 7.9233701690      | 0.63330446952E-01  |
| 3.1847889778      | 0.17056208548      |
| 1.3427790019      | 0.30119020299      |
| 1 d               |                    |

```

0.56149574983      1.0000000000
  1 d
0.22764073650      1.0000000000
  1 d
0.85211221793E-01  1.0000000000
  1 d
0.35000000000E-01  1.0000000000
  1 f
  1.4810000000      1.0000000000
  1 f
0.34500000000      1.0000000000
  1 f
0.11000000000      1.0000000000
  1 g
0.53100000000      1.0000000000
  1 g
0.13300000000      1.0000000000
*
*
ti def2-QZVPP
# ti      (24s18p9d3f2g) / [11s6p5d3f2g]      {(11)
4111111111/951111/51111/111/11}
*
  11 s
3070548.8651      0.86954016630E-05
460777.88643      0.67452737727E-04
104901.22889      0.35477293028E-03
29695.861199      0.14977525588E-02
9678.8892688      0.54309912055E-02
3490.1877912      0.17439360524E-01
1359.2217621      0.49835634640E-01
562.42721208      0.12379633943
244.22296250      0.25057490943
110.16668710      0.35934609007
50.881903357      0.27594242664
  4 s
965.95430789      0.41773927781E-02
299.27072059      0.40277148567E-01
114.83772939      0.17898686817
49.477578954      0.31783043543
  1 s
22.982839977      1.0000000000
  1 s
10.518305037      1.0000000000
  1 s
4.9774390567      1.0000000000
  1 s
2.1339846838      1.0000000000
  1 s
1.0342457284      1.0000000000
  1 s
0.46199774995      1.0000000000
  1 s
0.10621264194      1.0000000000
  1 s
0.54340347374E-01  1.0000000000
  1 s
0.25110217385E-01  1.0000000000
  9 p
5169.6755427      0.18802523596E-03

```



|                                    |                    |  |
|------------------------------------|--------------------|--|
| 1225.0961638                       | 0.16473458826E-02  |  |
| 397.60051934                       | 0.91104554321E-02  |  |
| 151.36154684                       | 0.36987450926E-01  |  |
| 63.613321773                       | 0.11376329624      |  |
| 28.514560307                       | 0.25345208574      |  |
| 13.248003298                       | 0.38019402704      |  |
| 6.3048807760                       | 0.30989136346      |  |
| 2.9493525821                       | 0.87418944007E-01  |  |
| 5 p                                |                    |  |
| 40.738772213                       | -0.73233793267E-02 |  |
| 14.062358461                       | -0.34282591082E-01 |  |
| 2.7460680961                       | 0.35655009250      |  |
| 1.2713688141                       | 0.76112035427      |  |
| 0.57610015545                      | 0.62716743237      |  |
| 1 p                                |                    |  |
| 0.23981820724                      | 1.0000000000       |  |
| 1 p                                |                    |  |
| 0.11000000000                      | 1.0000000000       |  |
| 1 p                                |                    |  |
| 0.50000000000E-01                  | 1.0000000000       |  |
| 1 p                                |                    |  |
| 0.23000000000E-01                  | 1.0000000000       |  |
| 5 d                                |                    |  |
| 89.589880075                       | 0.21223030030E-02  |  |
| 26.591412960                       | 0.15911819913E-01  |  |
| 9.7739715702                       | 0.62875243121E-01  |  |
| 3.9625083655                       | 0.17144170807      |  |
| 1.6890532654                       | 0.30565506624      |  |
| 1 d                                |                    |  |
| 0.71539771469                      | 1.0000000000       |  |
| 1 d                                |                    |  |
| 0.29366677748                      | 1.0000000000       |  |
| 1 d                                |                    |  |
| 0.11079094851                      | 1.0000000000       |  |
| 1 d                                |                    |  |
| 0.45000000000E-01                  | 1.0000000000       |  |
| 1 f                                |                    |  |
| 2.0930000000                       | 1.0000000000       |  |
| 1 f                                |                    |  |
| 0.56200000000                      | 1.0000000000       |  |
| 1 f                                |                    |  |
| 0.19100000000                      | 1.0000000000       |  |
| 1 g                                |                    |  |
| 1.0040000000                       | 1.0000000000       |  |
| 1 g                                |                    |  |
| 0.26800000000                      | 1.0000000000       |  |
| *                                  |                    |  |
| *                                  |                    |  |
| v def2-QZVPP                       |                    |  |
| # v (24s18p9d3f2g) / [11s6p5d3f2g] | {(11)}             |  |
| 4111111111/951111/51111/111/11}    |                    |  |
| *                                  |                    |  |
| 11 s                               |                    |  |
| 3360380.0382                       | 0.87027840678E-05  |  |
| 502646.73178                       | 0.67786024965E-04  |  |
| 114247.22867                       | 0.35699229090E-03  |  |
| 32321.972630                       | 0.15075507352E-02  |  |
| 10532.947271                       | 0.54664377528E-02  |  |
| 3798.3004439                       | 0.17547310839E-01  |  |
| 1479.6094715                       | 0.50106594778E-01  |  |

|                   |                    |
|-------------------|--------------------|
| 612.57405507      | 0.12431296066      |
| 266.22103326      | 0.25117026883      |
| 120.21980126      | 0.35926015903      |
| 55.591180848      | 0.27505075685      |
| 4 s               |                    |
| 1082.4768635      | 0.39326847695E-02  |
| 334.94462061      | 0.38298477998E-01  |
| 128.31559026      | 0.17259908827      |
| 55.311589616      | 0.31287423870      |
| 1 s               |                    |
| 25.108383036      | 1.0000000000       |
| 1 s               |                    |
| 11.667553242      | 1.0000000000       |
| 1 s               |                    |
| 5.5372073270      | 1.0000000000       |
| 1 s               |                    |
| 2.3781007618      | 1.0000000000       |
| 1 s               |                    |
| 1.1506947329      | 1.0000000000       |
| 1 s               |                    |
| 0.51283991040     | 1.0000000000       |
| 1 s               |                    |
| 0.11625711449     | 1.0000000000       |
| 1 s               |                    |
| 0.58272785598E-01 | 1.0000000000       |
| 1 s               |                    |
| 0.26662312245E-01 | 1.0000000000       |
| 9 p               |                    |
| 5782.8035005      | 0.18344743045E-03  |
| 1369.9392282      | 0.16095217453E-02  |
| 444.53147129      | 0.89242268749E-02  |
| 169.25617556      | 0.36375182379E-01  |
| 71.168730031      | 0.11246803294      |
| 31.933358374      | 0.25226107794      |
| 14.865336779      | 0.38039695005      |
| 7.0921740091      | 0.31068797325      |
| 3.3281157846      | 0.88141200458E-01  |
| 5 p               |                    |
| 45.842906017      | -0.56661391945E-02 |
| 15.940339016      | -0.26718979445E-01 |
| 3.1257155025      | 0.27354632707      |
| 1.4485867558      | 0.57972883053      |
| 0.65577902825     | 0.47601110515      |
| 1 p               |                    |
| 0.27311626644     | 1.0000000000       |
| 1 p               |                    |
| 0.12200000000     | 1.0000000000       |
| 1 p               |                    |
| 0.55000000000E-01 | 1.0000000000       |
| 1 p               |                    |
| 0.25000000000E-01 | 1.0000000000       |
| 5 d               |                    |
| 103.95047414      | 0.21007158819E-02  |
| 30.901688665      | 0.16015244877E-01  |
| 11.420321145      | 0.64127456940E-01  |
| 4.6573272292      | 0.17488905695      |
| 1.9963682623      | 0.31003778048      |
| 1 d               |                    |
| 0.84967249531     | 1.0000000000       |
| 1 d               |                    |

```

0.34953221876      1.0000000000
 1 d
0.13165588233      1.0000000000
 1 d
0.52000000000E-01  1.0000000000
 1 f
 2.9330000000      1.0000000000
 1 f
0.83100000000      1.0000000000
 1 f
0.25700000000      1.0000000000
 1 g
 1.8560000000      1.0000000000
 1 g
0.45500000000      1.0000000000
*
*
cr def2-QZVPP
# cr      (24s18p9d3f2g) / [11s6p5d3f2g]      {(11)
4111111111/951111/51111/111/11}
*
 11 s
3637838.6820      0.87693297699E-05
544864.46100      0.68169050223E-04
123997.55079      0.35844590272E-03
35116.733166      0.15117006948E-02
11455.702298      0.54731929774E-02
4135.9906712      0.17539430107E-01
1613.2513581      0.50004870927E-01
668.77932380      0.12393518958
291.01365155      0.25039606407
131.57328167      0.35870470429
60.924567928      0.27581148880
 4 s
1196.2899601      0.77368642037E-02
369.76947592      0.75837835399E-01
141.54426084      0.34435148637
60.999228765      0.63249297923
 1 s
27.599113358      1.0000000000
 1 s
12.882112056      1.0000000000
 1 s
 6.1247513721      1.0000000000
 1 s
 2.6332895309      1.0000000000
 1 s
 1.2708482289      1.0000000000
 1 s
0.56483575923      1.0000000000
 1 s
0.12596808943      1.0000000000
 1 s
0.62045607277E-01  1.0000000000
 1 s
0.28144312720E-01  1.0000000000
 9 p
6395.8781792      0.18104788151E-03
1515.1701574      0.15893658935E-02
491.70538681      0.88258739429E-02

```

|                                      |                    |  |
|--------------------------------------|--------------------|--|
| 187.28416675                         | 0.36068946983E-01  |  |
| 78.800346444                         | 0.11189649648      |  |
| 35.396291693                         | 0.25202239843      |  |
| 16.509278879                         | 0.38082266430      |  |
| 7.8947396863                         | 0.31035222437      |  |
| 3.7136414465                         | 0.87980310362E-01  |  |
| 5 p                                  |                    |  |
| 51.259312534                         | -0.60542038165E-02 |  |
| 17.934932523                         | -0.28761764001E-01 |  |
| 3.5257174218                         | 0.29087768170      |  |
| 1.6339163906                         | 0.61267525056      |  |
| 0.73852413834                        | 0.50126035018      |  |
| 1 p                                  |                    |  |
| 0.30752368193                        | 1.0000000000       |  |
| 1 p                                  |                    |  |
| 0.13500000000                        | 1.0000000000       |  |
| 1 p                                  |                    |  |
| 0.59000000000E-01                    | 1.0000000000       |  |
| 1 p                                  |                    |  |
| 0.26000000000E-01                    | 1.0000000000       |  |
| 5 d                                  |                    |  |
| 118.24986288                         | 0.21012757435E-02  |  |
| 35.193935700                         | 0.16212269500E-01  |  |
| 13.057816022                         | 0.65581852668E-01  |  |
| 5.3485602844                         | 0.17849601449      |  |
| 2.3004233713                         | 0.31376763016      |  |
| 1 d                                  |                    |  |
| 0.98114328305                        | 1.0000000000       |  |
| 1 d                                  |                    |  |
| 0.40334183206                        | 1.0000000000       |  |
| 1 d                                  |                    |  |
| 0.15135589551                        | 1.0000000000       |  |
| 1 d                                  |                    |  |
| 0.60000000000E-01                    | 1.0000000000       |  |
| 1 f                                  |                    |  |
| 3.7330000000                         | 1.0000000000       |  |
| 1 f                                  |                    |  |
| 1.1470000000                         | 1.0000000000       |  |
| 1 f                                  |                    |  |
| 0.3660000000                         | 1.0000000000       |  |
| 1 g                                  |                    |  |
| 2.6570000000                         | 1.0000000000       |  |
| 1 g                                  |                    |  |
| 0.7190000000                         | 1.0000000000       |  |
| *                                    |                    |  |
| *                                    |                    |  |
| mn def2-QZVPP                        |                    |  |
| # mn (24s18p10d4f2g) / [11s6p5d4f2g] | {(11)}             |  |
| 4111111111/951111/61111/1111/11}     |                    |  |
| *                                    |                    |  |
| 11 s                                 |                    |  |
| 4289357.6441                         | 0.79360554972E-05  |  |
| 636361.00285                         | 0.62542986761E-04  |  |
| 143637.27569                         | 0.33226388724E-03  |  |
| 40406.345432                         | 0.14130009568E-02  |  |
| 13104.363417                         | 0.51560918319E-02  |  |
| 4705.0664255                         | 0.16659574919E-01  |  |
| 1825.7125432                         | 0.47908083403E-01  |  |
| 753.33816229                         | 0.11994903752      |  |
| 326.47253285                         | 0.24550296959      |  |

|                   |                    |
|-------------------|--------------------|
| 147.10300670      | 0.35822739571      |
| 67.987226869      | 0.28295764442      |
| 4 s               |                    |
| 1300.7266717      | 0.76025154141E-02  |
| 402.72027544      | 0.74365109808E-01  |
| 154.38971348      | 0.33780474819      |
| 66.443384613      | 0.62779331746      |
| 1 s               |                    |
| 30.975316006      | 1.0000000000       |
| 1 s               |                    |
| 14.222980890      | 1.0000000000       |
| 1 s               |                    |
| 6.7598265074      | 1.0000000000       |
| 1 s               |                    |
| 2.9087083287      | 1.0000000000       |
| 1 s               |                    |
| 1.3966507792      | 1.0000000000       |
| 1 s               |                    |
| 0.61792624091     | 1.0000000000       |
| 1 s               |                    |
| 0.13439483715     | 1.0000000000       |
| 1 s               |                    |
| 0.65195053803E-01 | 1.0000000000       |
| 1 s               |                    |
| 0.29415713624E-01 | 1.0000000000       |
| 9 p               |                    |
| 6483.2629658      | 0.20479778890E-03  |
| 1556.7134859      | 0.17525750185E-02  |
| 509.73925460      | 0.95798802458E-02  |
| 195.28408089      | 0.38681362983E-01  |
| 82.542547525      | 0.11832401588      |
| 37.212076731      | 0.26168459627      |
| 17.425804462      | 0.38400628821      |
| 8.3691376962      | 0.29704166759      |
| 3.9409000444      | 0.78263290323E-01  |
| 5 p               |                    |
| 57.202741010      | -0.47749099800E-02 |
| 20.090935947      | -0.22989729915E-01 |
| 3.9357553763      | 0.23197065881      |
| 1.8181984012      | 0.48435204043      |
| 0.81881535281     | 0.39159479004      |
| 1 p               |                    |
| 0.34038359193     | 1.0000000000       |
| 1 p               |                    |
| 0.15000000000     | 1.0000000000       |
| 1 p               |                    |
| 0.63000000000E-01 | 1.0000000000       |
| 1 p               |                    |
| 0.27000000000E-01 | 1.0000000000       |
| 6 d               |                    |
| 200.40254535      | 0.89549560240E-03  |
| 59.898225773      | 0.76257630942E-02  |
| 22.810570167      | 0.34523224226E-01  |
| 9.5874142097      | 0.10552676975      |
| 4.2933710910      | 0.22575377683      |
| 1.9537618373      | 0.32766533667      |
| 1 d               |                    |
| 0.87378873598     | 1.0000000000       |
| 1 d               |                    |
| 0.37597748904     | 1.0000000000       |

```

1 d
0.14811547592      1.0000000000
1 d
0.60000000000E-01  1.0000000000
1 f
4.3530000000      1.0000000000
1 f
1.3260000000      1.0000000000
1 f
0.40800000000     1.0000000000
1 f
0.12550000000     1.0000000000
1 g
3.3160000000      1.0000000000
1 g
0.92900000000     1.0000000000
*
*
fe def2-QZVPP
# fe      (24s18p10d4f2g) / [11s6p5d4f2g]      {(11)}
4111111111/951111/61111/1111/11}
*
11 s
4313154.4338      0.86712290122E-05
645875.08253      0.67423150519E-04
146981.87698      0.35448747955E-03
41630.615044      0.14948285557E-02
13580.620109      0.54136698440E-02
4902.0620613      0.17362460824E-01
1911.2900837      0.49566574059E-01
791.99837852      0.12309089705
344.54799181      0.24936705764
155.78722730      0.35858414677
72.179380315      0.27738221642
4 s
1417.9125091      0.74871631942E-02
439.23184195      0.73337584435E-01
168.51006820      0.33383143870
72.776269412      0.62022524641
1 s
32.752961774      1.0000000000
1 s
15.434336101      1.0000000000
1 s
7.3639318205      1.0000000000
1 s
3.1698832880      1.0000000000
1 s
1.5243708395      1.0000000000
1 s
0.67496281152      1.0000000000
1 s
0.14718566032      1.0000000000
1 s
0.70082216629E-01  1.0000000000
1 s
0.31208269419E-01  1.0000000000
9 p
7709.0587627      0.17711229843E-03
1826.4666323      0.15560056795E-02

```

|                                      |                    |  |
|--------------------------------------|--------------------|--|
| 592.84368362                         | 0.86629536960E-02  |  |
| 225.93763245                         | 0.35565954156E-01  |  |
| 95.164758890                         | 0.11098847278      |  |
| 42.823132375                         | 0.25177796624      |  |
| 20.036286581                         | 0.38166911079      |  |
| 9.6159346283                         | 0.30963598261      |  |
| 4.5393538787                         | 0.87558276626E-01  |  |
| 5 p                                  |                    |  |
| 62.997519003                         | -0.50910388724E-02 |  |
| 22.262748731                         | -0.24540463235E-01 |  |
| 4.3900064942                         | 0.24345605487      |  |
| 2.0328913928                         | 0.50781898425      |  |
| 0.91592621576                        | 0.41214895672      |  |
| 1 p                                  |                    |  |
| 0.38036653507                        | 1.0000000000       |  |
| 1 p                                  |                    |  |
| 0.16000000000                        | 1.0000000000       |  |
| 1 p                                  |                    |  |
| 0.67000000000E-01                    | 1.0000000000       |  |
| 1 p                                  |                    |  |
| 0.28000000000E-01                    | 1.0000000000       |  |
| 6 d                                  |                    |  |
| 218.33430163                         | 0.93700006628E-03  |  |
| 65.256292616                         | 0.80008769378E-02  |  |
| 24.866944817                         | 0.36305286587E-01  |  |
| 10.473399301                         | 0.11057189871      |  |
| 4.6947005007                         | 0.23219588596      |  |
| 2.1315982534                         | 0.32922859685      |  |
| 1 d                                  |                    |  |
| 0.94748004605                        | 1.0000000000       |  |
| 1 d                                  |                    |  |
| 0.40346488831                        | 1.0000000000       |  |
| 1 d                                  |                    |  |
| 0.15687414728                        | 1.0000000000       |  |
| 1 d                                  |                    |  |
| 0.62000000000E-01                    | 1.0000000000       |  |
| 1 f                                  |                    |  |
| 5.1030000000                         | 1.0000000000       |  |
| 1 f                                  |                    |  |
| 1.5980000000                         | 1.0000000000       |  |
| 1 f                                  |                    |  |
| 0.50500000000                        | 1.0000000000       |  |
| 1 f                                  |                    |  |
| 0.15960000000                        | 1.0000000000       |  |
| 1 g                                  |                    |  |
| 3.9750000000                         | 1.0000000000       |  |
| 1 g                                  |                    |  |
| 1.1390000000                         | 1.0000000000       |  |
| *                                    |                    |  |
| *                                    |                    |  |
| co def2-QZVPP                        |                    |  |
| # co (24s18p10d4f2g) / [11s6p5d4f2g] | {(11)}             |  |
| 4111111111/951111/61111/1111/11}     |                    |  |
| *                                    |                    |  |
| 11 s                                 |                    |  |
| 4658206.5032                         | 0.86609506454E-05  |  |
| 697560.87453                         | 0.67336300186E-04  |  |
| 158759.87124                         | 0.35399044899E-03  |  |
| 44969.099379                         | 0.14926384309E-02  |  |
| 14670.714247                         | 0.54053095095E-02  |  |

|                   |                    |
|-------------------|--------------------|
| 5295.8947250      | 0.17335233605E-01  |
| 2065.0581167      | 0.49486641301E-01  |
| 855.90627750      | 0.12289351961      |
| 372.48747255      | 0.24903230028      |
| 168.50576608      | 0.35838320259      |
| 78.128761566      | 0.27777974150      |
| 4 s               |                    |
| 1534.5149885      | 0.74464372833E-02  |
| 475.52976096      | 0.72993601986E-01  |
| 182.54836839      | 0.33243104986      |
| 78.916467177      | 0.61900490005      |
| 1 s               |                    |
| 35.500865522      | 1.0000000000       |
| 1 s               |                    |
| 16.790414486      | 1.0000000000       |
| 1 s               |                    |
| 8.0240232510      | 1.0000000000       |
| 1 s               |                    |
| 3.4571682964      | 1.0000000000       |
| 1 s               |                    |
| 1.6599835391      | 1.0000000000       |
| 1 s               |                    |
| 0.73380022453     | 1.0000000000       |
| 1 s               |                    |
| 0.15878613103     | 1.0000000000       |
| 1 s               |                    |
| 0.74535659476E-01 | 1.0000000000       |
| 1 s               |                    |
| 0.32867351695E-01 | 1.0000000000       |
| 9 p               |                    |
| 8425.4331352      | 0.17491775490E-03  |
| 1995.8758452      | 0.15378901702E-02  |
| 647.76765681      | 0.85752453448E-02  |
| 246.88261214      | 0.35295266911E-01  |
| 104.00952246      | 0.11050007672      |
| 46.827478138      | 0.25160924538      |
| 21.934444535      | 0.38209003019      |
| 10.540499528      | 0.30947119879      |
| 4.9820419385      | 0.87436873012E-01  |
| 5 p               |                    |
| 69.270787130      | -0.61172424428E-02 |
| 24.583977935      | -0.29655043898E-01 |
| 4.8562258878      | 0.29163333190      |
| 2.2480916102      | 0.60629408335      |
| 1.0114285977      | 0.49057440018      |
| 1 p               |                    |
| 0.41919905455     | 1.0000000000       |
| 1 p               |                    |
| 0.17500000000     | 1.0000000000       |
| 1 p               |                    |
| 0.73000000000E-01 | 1.0000000000       |
| 1 p               |                    |
| 0.30000000000E-01 | 1.0000000000       |
| 6 d               |                    |
| 237.58450966      | 0.97593282671E-03  |
| 71.086896302      | 0.83432571945E-02  |
| 27.119080683      | 0.37958471100E-01  |
| 11.448239054      | 0.11522936171      |
| 5.1391806672      | 0.23843467913      |
| 2.3323492099      | 0.33205699955      |



|                                  |                                 |                   |  |
|----------------------------------|---------------------------------|-------------------|--|
| 1                                | d                               |                   |  |
| 1.0338662062                     |                                 | 0.33276836067     |  |
| 1                                | d                               |                   |  |
| 0.43785146294                    |                                 | 0.22769290932     |  |
| 1                                | d                               |                   |  |
| 0.16895004948                    |                                 | 0.74634129160E-01 |  |
| 1                                | d                               |                   |  |
| 0.66000000000E-01                |                                 | 1.0000000000      |  |
| 1                                | f                               |                   |  |
| 5.9750000000                     |                                 | 1.0000000000      |  |
| 1                                | f                               |                   |  |
| 1.9030000000                     |                                 | 1.0000000000      |  |
| 1                                | f                               |                   |  |
| 0.59400000000                    |                                 | 1.0000000000      |  |
| 1                                | f                               |                   |  |
| 0.18540000000                    |                                 | 1.0000000000      |  |
| 1                                | g                               |                   |  |
| 4.6350000000                     |                                 | 1.0000000000      |  |
| 1                                | g                               |                   |  |
| 1.3490000000                     |                                 | 1.0000000000      |  |
| *                                |                                 |                   |  |
| *                                |                                 |                   |  |
| ni                               | def2-QZVPP                      |                   |  |
| # ni                             | (24s18p10d4f2g) / [11s6p5d4f2g] | {(11)}            |  |
| 4111111111/951111/61111/1111/11} |                                 |                   |  |
| *                                |                                 |                   |  |
| 11                               | s                               |                   |  |
| 5037649.9532                     |                                 | 0.86072778771E-05 |  |
| 754246.39418                     |                                 | 0.66935354750E-04 |  |
| 171644.16010                     |                                 | 0.35190801168E-03 |  |
| 48617.230286                     |                                 | 0.14839082715E-02 |  |
| 15860.961795                     |                                 | 0.53736344264E-02 |  |
| 5726.0018653                     |                                 | 0.17233376287E-01 |  |
| 2232.9547317                     |                                 | 0.49211476915E-01 |  |
| 925.49649101                     |                                 | 0.12232504536     |  |
| 402.75336913                     |                                 | 0.24829251588     |  |
| 182.19422856                     |                                 | 0.35825476194     |  |
| 84.494109788                     |                                 | 0.27881865553     |  |
| 4                                | s                               |                   |  |
| 1678.0564586                     |                                 | 0.82462870895E-02 |  |
| 519.21358326                     |                                 | 0.81505940361E-01 |  |
| 198.95881607                     |                                 | 0.37495727651     |  |
| 85.901180703                     |                                 | 0.70841743832     |  |
| 1                                | s                               |                   |  |
| 38.435760123                     |                                 | 1.0000000000      |  |
| 1                                | s                               |                   |  |
| 18.252349351                     |                                 | 1.0000000000      |  |
| 1                                | s                               |                   |  |
| 8.7283616939                     |                                 | 1.0000000000      |  |
| 1                                | s                               |                   |  |
| 3.7616245662                     |                                 | 1.0000000000      |  |
| 1                                | s                               |                   |  |
| 1.8028217338                     |                                 | 1.0000000000      |  |
| 1                                | s                               |                   |  |
| 0.79507140513                    |                                 | 1.0000000000      |  |
| 1                                | s                               |                   |  |
| 0.17031720284                    |                                 | 1.0000000000      |  |
| 1                                | s                               |                   |  |
| 0.78971236177E-01                |                                 | 1.0000000000      |  |
| 1                                | s                               |                   |  |

```

0.34503486750E-01  1.0000000000
 9 p
9156.5701453      0.17346418360E-03
2169.0239526      0.15257220493E-02
703.98918991      0.85163281036E-02
268.36293215      0.35117466952E-01
113.10288796      0.11020275383
50.955539222      0.25162601670
23.896708209      0.38246389853
11.498241522      0.30907230267
5.4410908056      0.87194377415E-01
 5 p
75.938560736      -0.74635546629E-02
27.037350184      -0.36453401627E-01
5.3404687432      0.35633549406
2.4700181361      0.73774121992
1.1095029064      0.59439383024
 1 p
0.45899767101     1.0000000000
 1 p
0.18700000000     1.0000000000
 1 p
0.76200000000E-01 1.0000000000
 1 p
0.31000000000E-01 1.0000000000
 6 d
258.11131142      0.23726274275E-02
77.254891371      0.20330132784E-01
29.500240033      0.92748486665E-01
12.477446945      0.28082284560
5.6070455111      0.57392657880
2.5427744163      0.78766058527
 1 d
1.1238296774      0.77868790423
 1 d
0.47361171459     0.52932234348
 1 d
0.18161858319     0.17478168242
 1 d
0.71000000000E-01 1.0000000000
 1 f
6.7580000000      1.0000000000
 1 f
2.1740000000      1.0000000000
 1 f
0.6810000000      1.0000000000
 1 f
0.2130000000      1.0000000000
 1 g
5.2940000000      1.0000000000
 1 g
1.5580000000      1.0000000000
*
*
cu def2-QZVPP
# cu      (24s18p10d4f2g) / [11s6p5d4f2g]      {(11)
4111111111/951111/61111/1111/11}
*
 11 s
5056467.8898      0.93501916365E-05

```

|                   |                    |
|-------------------|--------------------|
| 759457.83835      | 0.72323443222E-04  |
| 173524.88497      | 0.37813833845E-03  |
| 49327.259988      | 0.15870129862E-02  |
| 16144.149930      | 0.57220685294E-02  |
| 5844.5964680      | 0.18268390048E-01  |
| 2284.6812739      | 0.51893720863E-01  |
| 948.88232514      | 0.12796192366      |
| 413.66215455      | 0.25629891036      |
| 187.38942059      | 0.36064416138      |
| 86.872771648      | 0.26833664660      |
| 4 s               |                    |
| 1744.0598287      | 0.88587079141E-02  |
| 540.93295513      | 0.86522785813E-01  |
| 207.99736224      | 0.38932285258      |
| 90.475793036      | 0.69777199902      |
| 1 s               |                    |
| 38.869687699      | 1.0000000000       |
| 1 s               |                    |
| 18.974829147      | 1.0000000000       |
| 1 s               |                    |
| 9.0953644635      | 1.0000000000       |
| 1 s               |                    |
| 3.8330020174      | 1.0000000000       |
| 1 s               |                    |
| 1.8198891499      | 1.0000000000       |
| 1 s               |                    |
| 0.79068098393     | 1.0000000000       |
| 1 s               |                    |
| 0.14914142106     | 1.0000000000       |
| 1 s               |                    |
| 0.72448090592E-01 | 1.0000000000       |
| 1 s               |                    |
| 0.30959925368E-01 | 1.0000000000       |
| 9 p               |                    |
| 9720.4614555      | 0.17828803512E-03  |
| 2302.7557452      | 0.15678108633E-02  |
| 747.48498314      | 0.87470094509E-02  |
| 285.00132623      | 0.36044549301E-01  |
| 120.15121609      | 0.11287209053      |
| 54.145261156      | 0.25647377341      |
| 25.406033563      | 0.38512918379      |
| 12.224331465      | 0.30316512356      |
| 5.7638720668      | 0.81677218969E-01  |
| 5 p               |                    |
| 83.210837217      | -0.63530359993E-02 |
| 29.694779129      | -0.31383834666E-01 |
| 5.8248516206      | 0.30930039753      |
| 2.6746181180      | 0.63583925938      |
| 1.1841836775      | 0.50946045967      |
| 1 p               |                    |
| 0.48043583535     | 1.0000000000       |
| 1 p               |                    |
| 0.18700000000     | 1.0000000000       |
| 1 p               |                    |
| 0.76200000000E-01 | 1.0000000000       |
| 1 p               |                    |
| 0.31000000000E-01 | 1.0000000000       |
| 6 d               |                    |
| 249.54025080      | 0.12432881244E-02  |
| 74.683914534      | 0.10456901995E-01  |

|                                      |                   |  |
|--------------------------------------|-------------------|--|
| 28.392717116                         | 0.46451241249E-01 |  |
| 11.955968430                         | 0.13541359729     |  |
| 5.3210744624                         | 0.25852899978     |  |
| 2.3661189459                         | 0.33168127635     |  |
| 1 d                                  |                   |  |
| 1.0131863994                         | 1.0000000000      |  |
| 1 d                                  |                   |  |
| 0.40710035940                        | 1.0000000000      |  |
| 1 d                                  |                   |  |
| 0.14742541032                        | 1.0000000000      |  |
| 1 d                                  |                   |  |
| 0.71000000000E-01                    | 1.0000000000      |  |
| 1 f                                  |                   |  |
| 6.9620000000                         | 1.0000000000      |  |
| 1 f                                  |                   |  |
| 2.2330000000                         | 1.0000000000      |  |
| 1 f                                  |                   |  |
| 0.70400000000                        | 1.0000000000      |  |
| 1 f                                  |                   |  |
| 0.24000000000                        | 1.0000000000      |  |
| 1 g                                  |                   |  |
| 5.9530000000                         | 1.0000000000      |  |
| 1 g                                  |                   |  |
| 1.7680000000                         | 1.0000000000      |  |
| *                                    |                   |  |
| *                                    |                   |  |
| zn def2-QZVPP                        |                   |  |
| # zn (24s18p10d4f2g) / [11s6p5d4f2g] | {(11)}            |  |
| 4111111111/951111/61111/1111/11}     |                   |  |
| *                                    |                   |  |
| 11 s                                 |                   |  |
| 5742307.1507                         | 0.86864381562E-05 |  |
| 861450.78790                         | 0.67364668570E-04 |  |
| 196346.05866                         | 0.35349715135E-03 |  |
| 55682.870737                         | 0.14884153943E-02 |  |
| 18183.902394                         | 0.53840916617E-02 |  |
| 6569.6448019                         | 0.17252738209E-01 |  |
| 2563.5613276                         | 0.49238679132E-01 |  |
| 1063.1147176                         | 0.12235812174     |  |
| 462.89771078                         | 0.24835390245     |  |
| 209.52821049                         | 0.35830632832     |  |
| 97.240787991                         | 0.27880259960     |  |
| 4 s                                  |                   |  |
| 1929.2689992                         | 0.83077002177E-02 |  |
| 598.07122307                         | 0.81882590163E-01 |  |
| 229.69667336                         | 0.37588060221     |  |
| 99.416819228                         | 0.71067260445     |  |
| 1 s                                  |                   |  |
| 44.241101421                         | 1.0000000000      |  |
| 1 s                                  |                   |  |
| 21.194367113                         | 1.0000000000      |  |
| 1 s                                  |                   |  |
| 10.158731597                         | 1.0000000000      |  |
| 1 s                                  |                   |  |
| 4.3746176158                         | 1.0000000000      |  |
| 1 s                                  |                   |  |
| 2.0901489071                         | 1.0000000000      |  |
| 1 s                                  |                   |  |
| 0.91869136437                        | 1.0000000000      |  |
| 1 s                                  |                   |  |

|                                             |                    |
|---------------------------------------------|--------------------|
| 0.19278660606                               | 1.0000000000       |
| 1 s                                         |                    |
| 0.87329915171E-01                           | 1.0000000000       |
| 1 s                                         |                    |
| 0.37552217126E-01                           | 1.0000000000       |
| 9 p                                         |                    |
| 10690.445107                                | 0.17142867222E-03  |
| 2532.3159340                                | 0.15088012830E-02  |
| 821.94295003                                | 0.84368777910E-02  |
| 313.42757800                                | 0.34898103208E-01  |
| 132.18314247                                | 0.10993617353      |
| 59.620554387                                | 0.25207277070      |
| 28.019488868                                | 0.38325657524      |
| 13.511704850                                | 0.30787091255      |
| 6.4053711253                                | 0.86411696761E-01  |
| 5 p                                         |                    |
| 89.981131918                                | -0.96262847843E-02 |
| 32.241767106                                | -0.47509407258E-01 |
| 6.3809448581                                | 0.45834100431      |
| 2.9477928353                                | 0.94473799128      |
| 1.3200854955                                | 0.75923464871      |
| 1 p                                         |                    |
| 0.54424674445                               | 1.0000000000       |
| 1 p                                         |                    |
| 0.25799971797                               | 1.0000000000       |
| 1 p                                         |                    |
| 0.92863192359E-01                           | 1.0000000000       |
| 1 p                                         |                    |
| 0.34059341410E-01                           | 1.0000000000       |
| 6 d                                         |                    |
| 305.22298937                                | 0.27359792434E-02  |
| 91.468273202                                | 0.23585229776E-01  |
| 34.986985968                                | 0.10858422440      |
| 14.849415187                                | 0.32843594226      |
| 6.6858545707                                | 0.66180235634      |
| 3.0309412620                                | 0.89165339320      |
| 1 d                                         |                    |
| 1.3355050671                                | 1.0000000000       |
| 1 d                                         |                    |
| 0.55883176392                               | 1.0000000000       |
| 1 d                                         |                    |
| 0.21180799287                               | 1.0000000000       |
| 1 d                                         |                    |
| 0.83000000000E-01                           | 1.0000000000       |
| 1 f                                         |                    |
| 8.0200000000                                | 1.0000000000       |
| 1 f                                         |                    |
| 2.6140000000                                | 1.0000000000       |
| 1 f                                         |                    |
| 0.83600000000                               | 1.0000000000       |
| 1 f                                         |                    |
| 0.26730000000                               | 1.0000000000       |
| 1 g                                         |                    |
| 6.6130000000                                | 1.0000000000       |
| 1 g                                         |                    |
| 1.9780000000                                | 1.0000000000       |
| *                                           |                    |
| *                                           |                    |
| ga def2-QZVPP                               |                    |
| # ga (24s19p10d4f1g) / [11s7p4d4f1g] {(11)} |                    |

4111111111/9241111/7111/1111/1}

\*

|                   |                    |
|-------------------|--------------------|
| 11 s              |                    |
| 6623802.0274      | 0.79091326051E-05  |
| 987904.07075      | 0.61835727406E-04  |
| 224132.05899      | 0.32636322451E-03  |
| 63315.192943      | 0.13810365049E-02  |
| 20611.312702      | 0.50153772104E-02  |
| 7429.1672482      | 0.16130936803E-01  |
| 2894.2071720      | 0.46240827188E-01  |
| 1198.9915786      | 0.11579099571      |
| 521.82003812      | 0.23834840794      |
| 236.27549237      | 0.35374255971      |
| 109.98395671      | 0.29055721918      |
| 4 s               |                    |
| 2101.2587253      | 0.83039611523E-02  |
| 650.97022519      | 0.82254127688E-01  |
| 250.22438356      | 0.38021717478      |
| 108.17616625      | 0.74503594690      |
| 1 s               |                    |
| 51.057486710      | 1.0000000000       |
| 1 s               |                    |
| 23.647474527      | 1.0000000000       |
| 1 s               |                    |
| 11.361701144      | 1.0000000000       |
| 1 s               |                    |
| 5.0178135897      | 1.0000000000       |
| 1 s               |                    |
| 2.4102674998      | 1.0000000000       |
| 1 s               |                    |
| 1.0741046685      | 1.0000000000       |
| 1 s               |                    |
| 0.25745075831     | 1.0000000000       |
| 1 s               |                    |
| 0.12175227548     | 1.0000000000       |
| 1 s               |                    |
| 0.52360599017E-01 | 1.0000000000       |
| 9 p               |                    |
| 14711.750483      | 0.11130990649E-03  |
| 3482.1451716      | 0.98495921142E-03  |
| 1130.2186655      | 0.55854182058E-02  |
| 431.54093448      | 0.23682413047E-01  |
| 182.41723648      | 0.78211587173E-01  |
| 82.706753603      | 0.19503829929      |
| 39.228128772      | 0.34131988495      |
| 19.201979939      | 0.35718665135      |
| 9.5056966689      | 0.16395955052      |
| 2 p               |                    |
| 92.615613022      | -0.85848284169E-01 |
| 33.750148165      | -0.39435019538     |
| 4 p               |                    |
| 7.3482283015      | 0.37941606569      |
| 3.7813384844      | 0.71306291866      |
| 2.3145183128      | 0.43210001481      |
| 0.80346859715     | 0.25838122797      |
| 1 p               |                    |
| 1.5423710087      | 1.0000000000       |
| 1 p               |                    |
| 0.32910239639     | 1.0000000000       |
| 1 p               |                    |

```

0.11834088831      1.0000000000
  1 p
0.41627877699E-01  1.0000000000
  7 d
363.49565218      0.87402299276E-03
109.01749589      0.76751934098E-02
41.866430715      0.36388975341E-01
17.879279894      0.11325183017
8.1201893671      0.23770881294
3.7360611356      0.33306060389
1.6826812549      0.33130613756
  1 d
0.72655790500      0.21895437571
  1 d
0.28498585079      1.0000000000
  1 d
0.11200000000      1.0000000000
  1 f
7.7947037670      1.0000000000
  1 f
2.2956705920      1.0000000000
  1 f
0.18100000000      1.0000000000
  1 f
0.47100000000      1.0000000000
  1 g
0.40320000000      1.0000000000
*
*
ge def2-QZVPP
# ge      (24s19p10d4f1g) / [11s7p4d4f1g]      {(11)
4111111111/9241111/7111/1111/1}
*
  11 s
7233056.0346      0.76638751457E-05
1082886.1731      0.59603601369E-04
246481.46959      0.31319088031E-03
69862.426955      0.13194051561E-02
22815.809662      0.47736099191E-02
8246.5369297      0.15319250467E-01
3219.9367257      0.43900870673E-01
1336.5743706      0.11028573632
582.87737501      0.22912630489
264.59511360      0.34779259246
123.77823320      0.29968722223
  4 s
2311.1055804      0.75033084731E-02
716.27089868      0.74778386626E-01
275.45330910      0.35092882302
118.93292565      0.72055989686
  1 s
58.435699085      1.0000000000
  1 s
26.261575973      1.0000000000
  1 s
12.664880671      1.0000000000
  1 s
5.7269548505      1.0000000000
  1 s
2.7555023203      1.0000000000

```

|                   |                   |
|-------------------|-------------------|
| 1 s               |                   |
| 1.2432886754      | 1.0000000000      |
| 1 s               |                   |
| 0.33107183846     | 1.0000000000      |
| 1 s               |                   |
| 0.15964081368     | 1.0000000000      |
| 1 s               |                   |
| 0.68463178923E-01 | 1.0000000000      |
| 9 p               |                   |
| 16555.711074      | 0.10199370391E-03 |
| 3914.9903745      | 0.90504190546E-03 |
| 1269.4766518      | 0.51558490762E-02 |
| 484.35437789      | 0.22010335708E-01 |
| 204.64985822      | 0.73434798827E-01 |
| 92.791032094      | 0.18608955294     |
| 44.055060255      | 0.33330981945     |
| 21.601319931      | 0.36229776246     |
| 10.732169233      | 0.17765186263     |
| 2 p               |                   |
| 100.88933962      | -0.11146182144    |
| 36.640254741      | -0.52324324314    |
| 4 p               |                   |
| 8.0343224115      | 0.31484763263     |
| 4.5613438333      | 0.38737744790     |
| 3.1794882223      | 0.50034353638     |
| 0.92612041457     | 0.22656707948     |
| 1 p               |                   |
| 1.7977040907      | 1.0000000000      |
| 1 p               |                   |
| 0.41386865432     | 1.0000000000      |
| 1 p               |                   |
| 0.15830798709     | 1.0000000000      |
| 1 p               |                   |
| 0.57877035911E-01 | 1.0000000000      |
| 7 d               |                   |
| 420.99565921      | 0.78212192196E-03 |
| 126.36209818      | 0.69560123831E-02 |
| 48.661473548      | 0.33712188323E-01 |
| 20.880325527      | 0.10717291194     |
| 9.5418229355      | 0.23161030141     |
| 4.4353653868      | 0.33390954301     |
| 2.0285421942      | 0.33720676378     |
| 1 d               |                   |
| 0.89484935267     | 0.21702473265     |
| 1 d               |                   |
| 0.35786074334     | 1.0000000000      |
| 1 d               |                   |
| 0.14000000000     | 1.0000000000      |
| 1 f               |                   |
| 8.9425329000      | 1.0000000000      |
| 1 f               |                   |
| 2.6920312990      | 1.0000000000      |
| 1 f               |                   |
| 0.54920000000     | 1.0000000000      |
| 1 f               |                   |
| 0.21900000000     | 1.0000000000      |
| 1 g               |                   |
| 0.46810000000     | 1.0000000000      |

\*

\*



```

as def2-QZVPP
# as      (24s20p10d4f1g) / [11s7p4d4f1g]      {(11)4111111111/(10)
511111/7111/1111/1}
*
  11 s
  8217482.6198      0.70590618422E-05
  1230500.3720      0.54880889611E-04
  280225.86648      0.28809164698E-03
  79482.509415      0.12129779464E-02
  25963.783351      0.43914559880E-02
  9381.4010193      0.14125362961E-01
  3660.4911972      0.40657915618E-01
  1518.2356024      0.10300382633
  661.80098920      0.21730077101
  300.58642127      0.33995751412
  141.11137296      0.31088634077
  4 s
  2577.0870580      0.70752991980E-02
  798.07872277      0.71383615256E-01
  306.57574948      0.34287024634
  132.27558802      0.74361403413
  1 s
  67.448702235      1.0000000000
  1 s
  29.209180441      1.0000000000
  1 s
  14.156509326      1.0000000000
  1 s
  6.5561506682      1.0000000000
  1 s
  3.1392847238      1.0000000000
  1 s
  1.4294631050      1.0000000000
  1 s
  0.41103390885      1.0000000000
  1 s
  0.20032453310      1.0000000000
  1 s
  0.85669928850E-01  1.0000000000
  10 p
  25198.504278      0.54758168372E-04
  5972.5601381      0.48572462452E-03
  1941.9123183      0.27908085625E-02
  743.59381104      0.12201505962E-01
  315.63828052      0.42666285138E-01
  143.96878925      0.11870919141
  69.068683164      0.24909407023
  34.254305629      0.36061356903
  17.371746759      0.29392241832
  8.7634555628      0.97829057366E-01
  5 p
  228.49024582      -0.24900140765E-02
  86.313555488      -0.19482515843E-01
  36.751366267      -0.61495071038E-01
  8.5365149464      0.47258065062
  4.1935128599      1.0236065079
  1 p
  2.0464980417      1.0000000000
  1 p
  0.98000000000      1.0000000000

```

```

1 p
0.40534340618      1.0000000000
1 p
0.16655070471      1.0000000000
1 p
0.65981706123E-01  1.0000000000
7 d
479.32599612      0.71722800196E-03
143.96064855      0.64419223046E-02
55.548909224      0.31776498964E-01
23.927581006      0.10276249168
10.988194172      0.22710952843
5.1489356262      0.33477474118
2.3836810892      0.34175986071
1 d
1.0688204667      0.21462891644
1 d
0.43305693742      1.0000000000
1 d
0.17000000000      1.0000000000
1 f
10.181096831      1.0000000000
1 f
3.1280704550      1.0000000000
1 f
0.26400000000      1.0000000000
1 f
0.64400000000      1.0000000000
1 g
0.54650000000      1.0000000000
*
*
se def2-QZVPP
# se      (24s20p10d4f1g) / [11s7p4d4f1g]      {(11)4111111111/(10)
511111/7111/1111/1}
*
11 s
9520446.7743      0.63309690150E-05
1424984.0802      0.49267697990E-04
324127.57682      0.25920249744E-03
91774.876950      0.10943145743E-02
29932.725725      0.39706139067E-02
10804.617905      0.12801187916E-01
4214.0134779      0.36980379417E-01
1747.8116633      0.94461349896E-01
762.12160878      0.20274705434
346.45604141      0.32878956424
163.11569304      0.32300252609
4 s
2614.5153067      0.79113928518E-02
818.68552756      0.77187739408E-01
318.63398991      0.35672061949
139.04844125      0.75846750004
1 s
78.348734788      1.0000000000
1 s
31.704290663      1.0000000000
1 s
15.505859269      1.0000000000
1 s

```

|                   |                    |
|-------------------|--------------------|
| 7.3227423625      | 1.0000000000       |
| 1 s               |                    |
| 3.4969483549      | 1.0000000000       |
| 1 s               |                    |
| 1.6121546085      | 1.0000000000       |
| 1 s               |                    |
| 0.49587158541     | 1.0000000000       |
| 1 s               |                    |
| 0.24092138175     | 1.0000000000       |
| 1 s               |                    |
| 0.10231739397     | 1.0000000000       |
| 10 p              |                    |
| 25360.215615      | 0.60531790911E-04  |
| 5993.7896610      | 0.53987774437E-03  |
| 1943.0741755      | 0.31130456170E-02  |
| 742.35316156      | 0.13599674694E-01  |
| 314.62114597      | 0.47298958377E-01  |
| 143.34748044      | 0.12981487726      |
| 68.673617552      | 0.26569982215      |
| 34.013554117      | 0.36723195311      |
| 17.198099621      | 0.27478356345      |
| 8.5830329629      | 0.79256169683E-01  |
| 5 p               |                    |
| 236.58209146      | -0.12271649354E-02 |
| 90.576183214      | -0.92584627774E-02 |
| 39.086689301      | -0.28428728384E-01 |
| 9.3084344018      | 0.21201102192      |
| 4.6169923084      | 0.47117589805      |
| 1 p               |                    |
| 2.2653477506      | 1.0000000000       |
| 1 p               |                    |
| 1.0800000000      | 1.0000000000       |
| 1 p               |                    |
| 0.47939328581     | 1.0000000000       |
| 1 p               |                    |
| 0.19619983845     | 1.0000000000       |
| 1 p               |                    |
| 0.76256339275E-01 | 1.0000000000       |
| 7 d               |                    |
| 539.48700124      | 0.66722955533E-03  |
| 162.13394435      | 0.60399330928E-02  |
| 62.661795641      | 0.30238666507E-01  |
| 27.077272889      | 0.99267892065E-01  |
| 12.483003929      | 0.22358036310      |
| 5.8864623136      | 0.33574682762      |
| 2.7519131105      | 0.34554856483      |
| 1 d               |                    |
| 1.2500769617      | 0.21216654622      |
| 1 d               |                    |
| 0.51172841843     | 1.0000000000       |
| 1 d               |                    |
| 0.2000000000      | 1.0000000000       |
| 1 f               |                    |
| 11.333391939      | 1.0000000000       |
| 1 f               |                    |
| 3.5185505690      | 1.0000000000       |
| 1 f               |                    |
| 0.2840000000      | 1.0000000000       |
| 1 f               |                    |
| 0.7097000000      | 1.0000000000       |

```

1 g
0.57300000000 1.0000000000
*
*
br def2-QZVPP
# br (24s20p10d4f1g) / [11s7p4d4f1g] {(11)4111111111/(10)
511111/7111/1111/1}
*
11 s
10629044.264 0.59322104325E-05
1591918.2739 0.46118980689E-04
362333.98437 0.24244612378E-03
102643.11141 0.10231422748E-02
33489.846668 0.37121984175E-02
12091.247190 0.11978107933E-01
4716.1908789 0.34682692842E-01
1956.1598080 0.89068331264E-01
853.08595848 0.19330124567
387.96633666 0.32071144956
182.85156613 0.32996797574
4 s
3240.4086421 0.65905194070E-02
1000.4631935 0.68439609656E-01
383.37301682 0.34495478668
166.03929698 0.82315542085
1 s
87.919906994 1.0000000000
1 s
35.675840068 1.0000000000
1 s
17.543657842 1.0000000000
1 s
8.4473660433 1.0000000000
1 s
3.9666180616 1.0000000000
1 s
1.8356815987 1.0000000000
1 s
0.59084778776 1.0000000000
1 s
0.28863218421 1.0000000000
1 s
0.12153380537 1.0000000000
10 p
26566.476579 0.62073657410E-04
6290.5088566 0.55131636217E-03
2043.3178410 0.31680110980E-02
781.67221007 0.13816597290E-01
331.51078945 0.48018539681E-01
151.09198667 0.13162015183
72.395278166 0.26860052203
35.869510844 0.36827391093
18.139906191 0.27108612944
9.0466688944 0.76215338633E-01
5 p
253.71822146 -0.13729169381E-02
97.250818058 -0.10393811185E-01
42.034897960 -0.32204214612E-01
9.9685673555 0.24224770086
4.9395854745 0.53557868398

```

```

1 p
2.4382845475      1.0000000000
1 p
1.1800000000      1.0000000000
1 p
0.51047564965     1.0000000000
1 p
0.21215851928     1.0000000000
1 p
0.83943604990E-01 1.0000000000
7 d
601.44434484      0.62783723765E-03
180.85718640      0.57205157153E-02
69.986806340      0.29002521527E-01
30.324710300      0.96446989766E-01
14.027909238      0.22065825870
6.6511702082      0.33657642375
3.1354168338      0.34872040582
1 d
1.4393591843      0.20984536473
1 d
0.59350441438     1.0000000000
1 d
0.23000000000     1.0000000000
1 f
12.703062423      1.0000000000
1 f
4.0083455670      1.0000000000
1 f
0.34070000000     1.0000000000
1 f
0.82570000000     1.0000000000
1 g
0.64910000000     1.0000000000
*
*
kr def2-QZVPP
# kr      (24s20p10d4f1g) / [11s7p4d4f1g]      {(11)4111111111/(10)
511111/7111/1111/1}
*
11 s
11713823.008      0.56915790360E-05
1755253.3979      0.44214471278E-04
399717.41924      0.23227813842E-03
113285.79260      0.97973661050E-03
36977.205293      0.35537627541E-02
13355.036580      0.11468673282E-01
5210.9012988      0.33241627469E-01
2162.1137020      0.85620725674E-01
943.29291023      0.18708766876
429.20724331      0.31497583326
202.40720840      0.33406191042
4 s
3260.4985521      0.73091509287E-02
1011.1069716      0.74040355445E-01
392.44359273      0.35414962222
173.21702132      0.80188286115
1 s
96.619988467      1.0000000000
1 s

```

|                   |                    |
|-------------------|--------------------|
| 38.158284867      | 1.0000000000       |
| 1 s               |                    |
| 18.959517570      | 1.0000000000       |
| 1 s               |                    |
| 9.2505996199      | 1.0000000000       |
| 1 s               |                    |
| 4.3486517621      | 1.0000000000       |
| 1 s               |                    |
| 2.0380324209      | 1.0000000000       |
| 1 s               |                    |
| 0.69110152540     | 1.0000000000       |
| 1 s               |                    |
| 0.33506065143     | 1.0000000000       |
| 1 s               |                    |
| 0.14074441124     | 1.0000000000       |
| 10 p              |                    |
| 28609.335767      | 0.60526369543E-04  |
| 6773.1236364      | 0.53786288403E-03  |
| 2199.8011079      | 0.30935356550E-02  |
| 841.50201590      | 0.13514318412E-01  |
| 356.92110288      | 0.47090086910E-01  |
| 162.71174351      | 0.12960370449      |
| 78.004264994      | 0.26607435646      |
| 38.682579997      | 0.36775851233      |
| 19.589158685      | 0.27406903542      |
| 9.7990863417      | 0.78773352304E-01  |
| 5 p               |                    |
| 261.37786869      | -0.16397212361E-02 |
| 100.09932146      | -0.12034797573E-01 |
| 44.012139363      | -0.34891485263E-01 |
| 10.854010739      | 0.25212650561      |
| 5.4351930182      | 0.57400781830      |
| 1 p               |                    |
| 2.7062805542      | 1.0000000000       |
| 1 p               |                    |
| 1.3195633408      | 1.0000000000       |
| 1 p               |                    |
| 0.58004455967     | 1.0000000000       |
| 1 p               |                    |
| 0.24329976264     | 1.0000000000       |
| 1 p               |                    |
| 0.96823725087E-01 | 1.0000000000       |
| 7 d               |                    |
| 665.35057386      | 0.59588702935E-03  |
| 200.17995366      | 0.54594260457E-02  |
| 77.545085570      | 0.27980992479E-01  |
| 33.677854345      | 0.94119165910E-01  |
| 15.624928334      | 0.21825215619      |
| 7.4427867423      | 0.33739971242      |
| 3.5336073535      | 0.35141418853      |
| 1 d               |                    |
| 1.6363725142      | 0.20756718931      |
| 1 d               |                    |
| 0.67845684728     | 1.0000000000       |
| 1 d               |                    |
| 0.27000000000     | 1.0000000000       |
| 1 f               |                    |
| 14.180116992      | 1.0000000000       |
| 1 f               |                    |
| 4.5393183680      | 1.0000000000       |

```

    1 f
    0.41300000000      1.0000000000
    1 f
    0.95570000000      1.0000000000
    1 g
    0.73950000000      1.0000000000
*
*
rb def2-QZVPP
# rb      (8s8p5d3f) / [7s5p4d3f]      {2111111/41111/2111/111}
*
    2 s
    7.4744618040      0.26999390986
    6.7296180594      -0.42624989529
    1 s
    2.7822883445      1.0000000000
    1 s
    0.53494544647      1.0000000000
    1 s
    0.22522959349      1.0000000000
    1 s
    0.50765580412E-01  1.0000000000
    1 s
    0.26940281781E-01  1.0000000000
    1 s
    0.13051395489E-01  1.0000000000
    4 p
    5.9998960731      0.54568549670E-01
    3.2040784712      -0.26447792498
    0.86991979950      0.50033505958
    0.44104169728      0.75243449327
    1 p
    0.22139898232      1.0000000000
    1 p
    0.10679039696      1.0000000000
    1 p
    0.33292658822E-01  1.0000000000
    1 p
    0.12847003750E-01  1.0000000000
    2 d
    4.6530655240      -0.11653388661E-02
    0.44914033653      0.15584297068
    1 d
    0.10089577190      0.48262396029
    1 d
    0.27432280711E-01  1.0000000000
    1 d
    0.95353625581E-02  1.0000000000
    1 f
    0.76580000000E-01  0.0000000000
    1 f
    0.48744000000      0.0000000000
    1 f
    1.18448000000      0.0000000000
*
rb def2-ecp
*
    ncore =      28      lmax =      3
#      coefficient      r^n      exponent
f

```

|     |             |   |           |
|-----|-------------|---|-----------|
|     | -12.3169000 | 2 | 3.8431140 |
| s-f | 89.5001980  | 2 | 5.0365510 |
|     | 0.4937610   | 2 | 1.9708490 |
|     | 12.3169000  | 2 | 3.8431140 |
| p-f | 58.5689740  | 2 | 4.2583410 |
|     | 0.4317910   | 2 | 1.4707090 |
|     | 12.3169000  | 2 | 3.8431140 |
| d-f | 26.2248980  | 2 | 3.0231270 |
|     | 0.9628390   | 2 | 0.6503830 |
|     | 12.3169000  | 2 | 3.8431140 |

\*

\*

sr def2-QZVPP

# sr (8s8p5d3f) / [7s5p4d3f] {21111111/411111/2111/111}

\*

|                   |                    |  |
|-------------------|--------------------|--|
| 2 s               |                    |  |
| 11.000000000      | -0.26157031021     |  |
| 9.900000000       | 0.36446668395      |  |
| 1 s               |                    |  |
| 2.8771178206      | 1.0000000000       |  |
| 1 s               |                    |  |
| 0.63364987829     | 1.0000000000       |  |
| 1 s               |                    |  |
| 0.28588739731     | 1.0000000000       |  |
| 1 s               |                    |  |
| 0.61938540840E-01 | 1.0000000000       |  |
| 1 s               |                    |  |
| 0.31237518881E-01 | 1.0000000000       |  |
| 1 s               |                    |  |
| 0.16266139051E-01 | 1.0000000000       |  |
| 4 p               |                    |  |
| 7.6233499793      | 0.71548409039E-01  |  |
| 3.6643075442      | -0.44232262175     |  |
| 0.97809648234     | 0.55690782709      |  |
| 0.77815253363     | 0.63437348922      |  |
| 1 p               |                    |  |
| 0.40666316828     | 1.0000000000       |  |
| 1 p               |                    |  |
| 0.18725455934     | 1.0000000000       |  |
| 1 p               |                    |  |
| 0.56304594427E-01 | 1.0000000000       |  |
| 1 p               |                    |  |
| 0.21826701680E-01 | 1.0000000000       |  |
| 2 d               |                    |  |
| 4.3003648126      | -0.43567751655E-02 |  |
| 0.84876551534     | 0.13176477946      |  |
| 1 d               |                    |  |
| 0.29200562252     | 0.27410245307      |  |
| 1 d               |                    |  |
| 0.94733990946E-01 | 1.0000000000       |  |
| 1 d               |                    |  |
| 0.30479894317E-01 | 1.0000000000       |  |
| 1 f               |                    |  |
| 0.10940000000     | 0.0000000000       |  |
| 1 f               |                    |  |
| 0.54080000000     | 0.0000000000       |  |
| 1 f               |                    |  |



```

1.3460000000      0.0000000000
*
sr def2-ecp
*
ncore =      28          lmax =      3
#   coefficient   r^n      exponent
f      -15.8059920      2          4.6339750
s-f      135.4794300      2          7.4000740
          17.5344630      2          3.6063790
          15.8059920      2          4.6339750
p-f      88.3597090      2          6.4848680
          15.3943720      2          3.2880530
          15.8059920      2          4.6339750
d-f      29.8889870      2          4.6228410
          6.6594140      2          2.2469040
          15.8059920      2          4.6339750
*
*
y def2-QZVPP
# y      (8s8p7d3f2g) / [7s5p4d3f2g]      {2111111/41111/4111/111/11}
*
2 s
12.000000000      -0.27445870024
10.800000000      0.37995468727
1 s
3.1007372195      1.00000000000
1 s
0.74155427570      1.00000000000
1 s
0.34176775775      1.00000000000
1 s
0.79428797018E-01  1.00000000000
1 s
0.43308336524E-01  1.00000000000
1 s
0.21593224872E-01  1.00000000000
4 p
8.0336135138      0.73041700172E-01
4.0181723477      -0.41610436192
1.1052105890      0.55451897342
0.83219316692      0.62307196069
1 p
0.44762676666      1.00000000000
1 p
0.20523347112      1.00000000000
1 p
0.55045561759E-01  1.00000000000
1 p
0.22603027453E-01  1.00000000000
4 d
13.755105347      0.23830583863E-02
3.9629908552      -0.25068021047E-01
1.3427449755      0.22348991872
0.62579248108      0.55237929771
1 d
0.27632363958      1.00000000000

```

```

1 d
0.11706987754      1.0000000000
1 d
0.46601501035E-01  1.0000000000
1 f
0.76291000000      1.0000000000
1 f
0.26515000000      1.0000000000
1 f
0.92150000000E-01  1.0000000000
1 g
0.30250000000      1.0000000000
1 g
0.11474000000      1.0000000000
*
y def2-ecp
*
ncore =      28      lmax =      3
#      coefficient  r^n      exponent
f
      -19.1221981    2      6.5842120
      -2.4363754    2      3.2921060
s-f
      135.1538441    2      7.4880494
      15.5524413    2      3.7440247
      19.1221981    2      6.5842120
      2.4363754    2      3.2921060
p-f
      87.7849917    2      6.4453772
      11.5640660    2      3.2226886
      19.1221981    2      6.5842120
      2.4363754    2      3.2921060
d-f
      29.7010007    2      4.6584472
      5.5399685    2      2.3292236
      19.1221981    2      6.5842120
      2.4363754    2      3.2921060
*
*
zr def2-QZVPP
# zr      (8s8p7d3f2g) / [7s5p4d3f2g]      {21111111/41111/4111/111/11}
*
2 s
13.000000000      0.30219052022
11.750000000      -0.41145056914
1 s
3.3679085035      1.0000000000
1 s
0.83813257389      1.0000000000
1 s
0.39094081796      1.0000000000
1 s
0.12165103956      1.0000000000
1 s
0.68995924030E-01  1.0000000000
1 s
0.28131941438E-01  1.0000000000
4 p
8.6639962104      0.73773984271E-01
4.4109566148      -0.40022747074

```

```

1.2360133871      0.54947233625
0.87445820593    0.61937721413
  1 p
0.47713887642    1.00000000000
  1 p
0.21764845261    1.00000000000
  1 p
0.57837163627E-01  1.00000000000
  1 p
0.20242456645E-01  1.00000000000
  4 d
14.106535710     0.29285547494E-02
 5.0597471810    -0.19680100129E-01
 1.4340490314     0.24763912308
0.65933129072     0.53572735030
  1 d
0.28894952351    1.00000000000
  1 d
0.12160731860    1.00000000000
  1 d
0.48470078407E-01  1.00000000000
  1 f
 1.1417100000     1.00000000000
  1 f
0.39261000000     1.00000000000
  1 f
0.13501000000     1.00000000000
  1 g
0.53073000000     1.00000000000
  1 g
0.18969000000     1.00000000000
*
zr def2-ecp
*
  ncore =      28          lmax =      3
#   coefficient   r^n      exponent
f
  -21.0937760     2          7.5400000
  -3.0806943      2          3.7700000
s-f
  150.2675911     2          8.2000000
  18.9762165      2          4.0897278
  21.0937760      2          7.5400000
  3.0806943       2          3.7700000
p-f
  99.6221237      2          7.1100000
  14.1687333      2          3.5967980
  21.0937760      2          7.5400000
  3.0806943       2          3.7700000
d-f
  35.0451235      2          5.3500000
  6.1112595       2          2.4918215
  21.0937760      2          7.5400000
  3.0806943       2          3.7700000
*
*
nb def2-QZVPP
# nb      (8s8p7d3f2g) / [7s5p4d3f2g]      {2111111/41111/4111/111/11}
*
  2 s

```

|                   |                    |
|-------------------|--------------------|
| 13.500000000      | -0.32410606901     |
| 12.200000000      | 0.44773333772      |
| 1 s               |                    |
| 3.7169274051      | 1.0000000000       |
| 1 s               |                    |
| 0.90652488058     | 1.0000000000       |
| 1 s               |                    |
| 0.41577606051     | 1.0000000000       |
| 1 s               |                    |
| 0.11042511303     | 1.0000000000       |
| 1 s               |                    |
| 0.62821821279E-01 | 1.0000000000       |
| 1 s               |                    |
| 0.28016289999E-01 | 1.0000000000       |
| 4 p               |                    |
| 9.3098091725      | 0.73705483583E-01  |
| 4.8178682975      | -0.38234456657     |
| 1.3632838380      | 0.54987821838      |
| 0.90647526151     | 0.61931035808      |
| 1 p               |                    |
| 0.50089563075     | 1.0000000000       |
| 1 p               |                    |
| 0.22793279437     | 1.0000000000       |
| 1 p               |                    |
| 0.60000000000E-01 | 1.0000000000       |
| 1 p               |                    |
| 0.20600000000E-01 | 1.0000000000       |
| 4 d               |                    |
| 17.364404474      | 0.26413526976E-02  |
| 5.3680385855      | -0.20806369564E-01 |
| 1.6586089067      | 0.24555637053      |
| 0.78121461396     | 0.53651499644      |
| 1 d               |                    |
| 0.34874234803     | 1.0000000000       |
| 1 d               |                    |
| 0.14844540532     | 1.0000000000       |
| 1 d               |                    |
| 0.59334919015E-01 | 1.0000000000       |
| 1 f               |                    |
| 1.5360500000      | 1.0000000000       |
| 1 f               |                    |
| 0.52270000000     | 1.0000000000       |
| 1 f               |                    |
| 0.17787000000     | 1.0000000000       |
| 1 g               |                    |
| 0.78318000000     | 1.0000000000       |
| 1 g               |                    |
| 0.26464000000     | 1.0000000000       |
| *                 |                    |
| nb def2-ecp       |                    |
| *                 |                    |
| ncore = 28        | lmax = 3           |
| # coefficient r^n | exponent           |
| f                 |                    |
| -22.9295500       | 2 8.4900000        |
| -3.6663099        | 2 4.2500000        |
| s-f               |                    |
| 165.1791435       | 2 8.9000000        |
| 21.9929744        | 2 4.4300000        |
| 22.9295500        | 2 8.4900000        |

|     |             |   |           |
|-----|-------------|---|-----------|
|     | 3.6663099   | 2 | 4.2500000 |
| p-f | 111.7944145 | 2 | 7.7700000 |
|     | 16.6334833  | 2 | 3.9600000 |
|     | 22.9295500  | 2 | 8.4900000 |
|     | 3.6663099   | 2 | 4.2500000 |
| d-f | 38.1122488  | 2 | 6.0500000 |
|     | 8.0391673   | 2 | 2.8400000 |
|     | 22.9295500  | 2 | 8.4900000 |
|     | 3.6663099   | 2 | 4.2500000 |

\*  
\*

mo def2-QZVPP  
# mo (9s8p7d3f2g) / [7s5p4d3f2g] {3111111/41111/4111/111/11}

\*

|                   |   |                    |  |
|-------------------|---|--------------------|--|
| 3                 | s |                    |  |
| 15.000000000      |   | 0.57082903143E-01  |  |
| 13.500000000      |   | -0.66824799324     |  |
| 12.571764111      |   | 0.75521146249      |  |
| 1                 | s |                    |  |
| 4.1304342348      |   | 1.0000000000       |  |
| 1                 | s |                    |  |
| 0.96478113331     |   | 1.0000000000       |  |
| 1                 | s |                    |  |
| 0.43736648981     |   | 1.0000000000       |  |
| 1                 | s |                    |  |
| 0.11318605514     |   | 1.0000000000       |  |
| 1                 | s |                    |  |
| 0.57579423658E-01 |   | 1.0000000000       |  |
| 1                 | s |                    |  |
| 0.27018151462E-01 |   | 1.0000000000       |  |
| 4                 | p |                    |  |
| 9.1087343439      |   | 0.10192125262      |  |
| 5.3495476626      |   | -0.38460279534     |  |
| 1.4870196599      |   | 0.53457134734      |  |
| 0.90585473836     |   | 0.61724117143      |  |
| 1                 | p |                    |  |
| 0.50141240214     |   | 1.0000000000       |  |
| 1                 | p |                    |  |
| 0.23286318145     |   | 1.0000000000       |  |
| 1                 | p |                    |  |
| 0.62000000000E-01 |   | 1.0000000000       |  |
| 1                 | p |                    |  |
| 0.21000000000E-01 |   | 1.0000000000       |  |
| 4                 | d |                    |  |
| 17.215377137      |   | 0.30147475909E-02  |  |
| 5.8496916871      |   | -0.28923836319E-01 |  |
| 1.8232967249      |   | 0.25398642015      |  |
| 0.86970233105     |   | 0.52725603860      |  |
| 1                 | d |                    |  |
| 0.39461697588     |   | 1.0000000000       |  |
| 1                 | d |                    |  |
| 0.17084141240     |   | 1.0000000000       |  |
| 1                 | d |                    |  |
| 0.69272819629E-01 |   | 1.0000000000       |  |
| 1                 | f |                    |  |
| 1.9462500000      |   | 1.0000000000       |  |
| 1                 | f |                    |  |
| 0.65545000000     |   | 1.0000000000       |  |

```

1 f
0.22074000000 1.0000000000
1 g
1.05980000000 1.0000000000
1 g
0.33958000000 1.0000000000
*
mo def2-ecp
*
ncore = 28 lmax = 3
# coefficient r^n exponent
f
-24.8051771 2 9.4500000
-4.1537815 2 4.7200000
s-f
180.1031085 2 9.7145938
24.9972279 2 4.6805004
24.8051771 2 9.4500000
4.1537815 2 4.7200000
p-f
123.7727523 2 8.1421366
19.5302280 2 4.6259863
24.8051771 2 9.4500000
4.1537815 2 4.7200000
d-f
48.3750223 2 6.6184148
8.8920527 2 3.2487516
24.8051771 2 9.4500000
4.1537815 2 4.7200000
*
*
tc def2-QZVPP
# tc (9s8p7d4f2g) / [7s5p4d4f2g] {3111111/41111/4111/1111/11}
*
3 s
15.000000000 -0.31349221639
13.500000000 0.44793618799
7.1022525122 0.20051786822E-01
1 s
4.4415995038 1.0000000000
1 s
1.0660127848 1.0000000000
1 s
0.48568559673 1.0000000000
1 s
0.12654965451 1.0000000000
1 s
0.66997954399E-01 1.0000000000
1 s
0.29822104753E-01 1.0000000000
4 p
10.298029968 0.83867175334E-01
5.7213792785 -0.36246957884
1.6296063991 0.53649463822
0.97528623230 0.61837212480
1 p
0.53997625690 1.0000000000
1 p
0.25172025379 1.0000000000
1 p

```

```

0.640000000000E-01  1.0000000000
 1 p
0.215000000000E-01  1.0000000000
 4 d
18.617708386      0.27056783609E-02
5.8369803972     -0.35968645824E-01
2.0921979438     0.21334851537
1.0148117201     0.45713971996
 1 d
0.46154215497    1.0000000000
 1 d
0.19795071041    1.0000000000
 1 d
0.78619872304E-01 1.0000000000
 1 f
2.3724000000     1.0000000000
 1 f
0.790800000000   1.0000000000
 1 f
0.263600000000   1.0000000000
 1 f
0.878700000000E-01 1.0000000000
 1 g
1.3606500000     1.0000000000
 1 g
0.41453000000    1.0000000000
*
tc def2-ecp
*
  ncore =    28      lmax =    3
#      coefficient  r^n      exponent
f
      -26.5624475   2      10.4000000
      -4.5856805   2      5.2000000
s-f
      195.1591659   2      10.4223462
      28.0926033   2      5.0365160
      26.5624475   2      10.4000000
      4.5856805    2      5.2000000
p-f
      135.2845662   2      8.9504494
      21.8065043   2      4.8544394
      26.5624475   2      10.4000000
      4.5856805    2      5.2000000
d-f
      54.3297294    2      6.9456968
      11.1550679    2      3.9705849
      26.5624475   2      10.4000000
      4.5856805    2      5.2000000
*
*
ru def2-QZVPP
# ru      (9s8p7d4f2g) / [7s5p4d4f2g]      {3111111/41111/4111/1111/11}
*
  3 s
15.000000000     0.40205707045
13.500000000     -0.59417167365
7.2130868530     0.12541032854
 1 s
4.5405901225     1.0000000000

```

```

1 s
1.1904973723      1.0000000000
1 s
0.54307531590    1.0000000000
1 s
0.13700563039    1.0000000000
1 s
0.73396375028E-01  1.0000000000
1 s
0.31250715458E-01  1.0000000000
4 p
11.388100061      0.55871461629E-01
6.1591005666     -0.25808446847
1.7320431063      0.42924265341
1.0194857402      0.43313353048
1 p
0.58131419111    1.0000000000
1 p
0.27290530268    1.0000000000
1 p
0.66000000000E-01  1.0000000000
1 p
0.22000000000E-01  1.0000000000
4 d
18.598247778     0.31556859652E-02
6.7883773752     -0.34551060293E-01
2.2470797667     0.21708566158
1.0884195428     0.42834135307
1 d
0.49787892886    1.0000000000
1 d
0.21481968266    1.0000000000
1 d
0.85666751170E-01  1.0000000000
1 f
2.8246600000     1.0000000000
1 f
0.94314000000    1.0000000000
1 f
0.31491000000    1.0000000000
1 f
0.10515000000    1.0000000000
1 g
1.7089400000     1.0000000000
1 g
0.53873000000    1.0000000000
*
ru def2-ecp
*
ncore = 28      lmax = 3
#      coefficient  r^n      exponent
f
      -28.3406163   2        11.3600000
      -4.9446292   2         5.6800000
s-f
      209.8229712   2        11.1052693
      30.6547264    2         5.4147454
      28.3406163   2        11.3600000
      4.9446292    2         5.6800000
p-f

```



|      |                             |                    |                               |
|------|-----------------------------|--------------------|-------------------------------|
|      | 146.3361823                 | 2                  | 9.7712707                     |
|      | 24.1278772                  | 2                  | 5.0739908                     |
|      | 28.3406163                  | 2                  | 11.3600000                    |
|      | 4.9446292                   | 2                  | 5.6800000                     |
| d-f  |                             |                    |                               |
|      | 67.5158967                  | 2                  | 7.6714231                     |
|      | 9.8701041                   | 2                  | 4.1365647                     |
|      | 28.3406163                  | 2                  | 11.3600000                    |
|      | 4.9446292                   | 2                  | 5.6800000                     |
| *    |                             |                    |                               |
| *    |                             |                    |                               |
| rh   | def2-QZVPP                  |                    |                               |
| # rh | (9s8p7d4f2g) / [7s5p4d4f2g] |                    | {31111111/41111/4111/1111/11} |
| *    |                             |                    |                               |
|      | 3 s                         |                    |                               |
|      | 15.000000000                | 0.50258059140      |                               |
|      | 13.500000000                | -0.76433277918     |                               |
|      | 7.4051116103                | 0.31145290674      |                               |
|      | 1 s                         |                    |                               |
|      | 4.5131696431                | 1.00000000000      |                               |
|      | 1 s                         |                    |                               |
|      | 1.3235977422                | 1.00000000000      |                               |
|      | 1 s                         |                    |                               |
|      | 0.60954144541               | 1.00000000000      |                               |
|      | 1 s                         |                    |                               |
|      | 0.18907192773               | 1.00000000000      |                               |
|      | 1 s                         |                    |                               |
|      | 0.89080450794E-01           | 1.00000000000      |                               |
|      | 1 s                         |                    |                               |
|      | 0.34131567514E-01           | 1.00000000000      |                               |
|      | 4 p                         |                    |                               |
|      | 11.839425278                | 0.59787418531E-01  |                               |
|      | 6.6953652636                | -0.24743454054     |                               |
|      | 1.8333616287                | 0.42987003231      |                               |
|      | 1.0267931770                | 0.42547313311      |                               |
|      | 1 p                         |                    |                               |
|      | 0.58071767020               | 1.00000000000      |                               |
|      | 1 p                         |                    |                               |
|      | 0.27907753269               | 1.00000000000      |                               |
|      | 1 p                         |                    |                               |
|      | 0.67108954625E-01           | 1.00000000000      |                               |
|      | 1 p                         |                    |                               |
|      | 0.22101542156E-01           | 1.00000000000      |                               |
|      | 4 d                         |                    |                               |
|      | 26.341167176                | 0.20623159685E-02  |                               |
|      | 7.8709462705                | -0.17239329053E-01 |                               |
|      | 2.5989970939                | 0.17284839402      |                               |
|      | 1.2613435752                | 0.36282102279      |                               |
|      | 1 d                         |                    |                               |
|      | 0.57578407979               | 1.00000000000      |                               |
|      | 1 d                         |                    |                               |
|      | 0.24725174897               | 1.00000000000      |                               |
|      | 1 d                         |                    |                               |
|      | 0.97531210324E-01           | 1.00000000000      |                               |
|      | 1 f                         |                    |                               |
|      | 3.2739100000                | 1.00000000000      |                               |
|      | 1 f                         |                    |                               |
|      | 1.0949900000                | 1.00000000000      |                               |
|      | 1 f                         |                    |                               |
|      | 0.36623000000               | 1.00000000000      |                               |

```

1 f
0.12249000000 1.0000000000
1 g
2.0298900000 1.0000000000
1 g
0.66294000000 1.0000000000
*
rh def2-ecp
*
ncore = 28 lmax = 3
# coefficient r^n exponent
f
-30.0934557 2 12.3100000
-5.2184819 2 6.1600000
s-f
225.3477535 2 11.7200000
32.8231890 2 5.8200000
30.0934557 2 12.3100000
5.2184819 2 6.1600000
p-f
158.7094116 2 10.4200000
26.4441005 2 5.4500000
30.0934557 2 12.3100000
5.2184819 2 6.1600000
d-f
62.7586257 2 8.8200000
10.9787195 2 3.8700000
30.0934557 2 12.3100000
5.2184819 2 6.1600000
*
*
pd def2-QZVPP
# pd (9s8p7d4f2g) / [7s5p4d4f2g] {3111111/41111/4111/1111/11}
*
3 s
15.262399331 0.44145727454
13.721983176 -0.70293005979
4.8448286268 0.36095390108
1 s
8.7309326588 1.0000000000
1 s
1.4357564094 1.0000000000
1 s
0.66088433720 1.0000000000
1 s
0.20897212790 1.0000000000
1 s
0.91936735872E-01 1.0000000000
1 s
0.34733479706E-01 1.0000000000
4 p
12.585237008 0.60002003747E-01
7.2058104839 -0.24022183118
1.9558705640 0.43424940067
1.0534418618 0.42084436088
1 p
0.59809389552 1.0000000000
1 p
0.30362411297 1.0000000000
1 p

```

```

0.880000000000E-01  1.0000000000
  1 p
0.300000000000E-01  1.0000000000
  4 d
  28.840985892      0.21131470308E-02
  8.4584163440     -0.17913194955E-01
  2.8648941754      0.17165507663
  1.3966488847      0.36149251150
  1 d
0.63921677230      1.0000000000
  1 d
0.27502319836      1.0000000000
  1 d
0.10829940074      1.0000000000
  1 f
  3.7200000000      1.0000000000
  1 f
  1.2462900000      1.0000000000
  1 f
0.41754000000      1.0000000000
  1 f
0.13989000000      1.0000000000
  1 g
  2.3234500000      1.0000000000
  1 g
0.78715000000      1.0000000000
*
pd def2-ecp
*
  ncore =    28      lmax =    3
#      coefficient  r^n      exponent
f
      -31.9295543   2      13.2700000
      -5.3982169   2      6.6300000
s-f
      240.2290403   2      12.4300000
      35.1719435    2      6.1707594
      31.9295543   2      13.2700000
      5.3982169    2      6.6300000
p-f
      170.4172760   2      11.0800000
      28.4721329    2      5.8295541
      31.9295543   2      13.2700000
      5.3982169    2      6.6300000
d-f
      69.0138449    2      9.5100000
      11.7508616    2      4.1397811
      31.9295543   2      13.2700000
      5.3982169    2      6.6300000
*
*
ag def2-QZVPP
# ag      (10s8p7d4f2g) / [7s5p4d4f2g]      {4111111/41111/4111/1111/11}
*
  4 s
  256.50898381      0.73215128094E-03
  19.000000000      -0.14706983774
  14.129749737      0.47914881797
  9.4840599768      -0.26930801705
  1 s

```

|                            |                    |
|----------------------------|--------------------|
| 5.5812682897               | 1.0000000000       |
| 1 s                        |                    |
| 1.4763753299               | 1.0000000000       |
| 1 s                        |                    |
| 0.66184584335              | 1.0000000000       |
| 1 s                        |                    |
| 0.15382171742              | 1.0000000000       |
| 1 s                        |                    |
| 0.79534248689E-01          | 1.0000000000       |
| 1 s                        |                    |
| 0.32408624506E-01          | 1.0000000000       |
| 4 p                        |                    |
| 13.350389537               | 0.62479151672E-01  |
| 7.7163302467               | -0.24398688175     |
| 2.0864535219               | 0.45439758415      |
| 1.0577805733               | 0.47607485340      |
| 1 p                        |                    |
| 0.52564427657              | 1.0000000000       |
| 1 p                        |                    |
| 0.23694908895              | 1.0000000000       |
| 1 p                        |                    |
| 0.66457980332E-01          | 1.0000000000       |
| 1 p                        |                    |
| 0.21864839286E-01          | 1.0000000000       |
| 4 d                        |                    |
| 32.147961274               | 0.34564677092E-02  |
| 9.0323725307               | -0.28135297216E-01 |
| 3.1673540854               | 0.26999486025      |
| 1.5519381135               | 0.57666767772      |
| 1 d                        |                    |
| 0.71310284000              | 1.0000000000       |
| 1 d                        |                    |
| 0.30749741551              | 1.0000000000       |
| 1 d                        |                    |
| 0.12094304210              | 1.0000000000       |
| 1 f                        |                    |
| 4.1631100000               | 1.0000000000       |
| 1 f                        |                    |
| 1.3971100000               | 1.0000000000       |
| 1 f                        |                    |
| 0.46886000000              | 1.0000000000       |
| 1 f                        |                    |
| 0.15735000000              | 1.0000000000       |
| 1 g                        |                    |
| 2.5896000000               | 1.0000000000       |
| 1 g                        |                    |
| 0.91135000000              | 1.0000000000       |
| *                          |                    |
| ag def2-ecp                |                    |
| *                          |                    |
| ncore = 28                 | lmax = 3           |
| # coefficient r^n exponent |                    |
| f                          |                    |
| -33.6899201 2 14.2200000   |                    |
| -5.5311202 2 7.1100000     |                    |
| s-f                        |                    |
| 255.1393645 2 13.1300000   |                    |
| 36.8661215 2 6.5100000     |                    |
| 33.6899201 2 14.2200000    |                    |
| 5.5311202 2 7.1100000      |                    |

```

p-f
    182.1818687    2    11.7400000
    30.3577515    2    6.2000000
    33.6899201    2    14.2200000
    5.5311202     2    7.1100000

d-f
    73.7192609    2    10.2100000
    12.5021171    2    4.3800000
    33.6899201    2    14.2200000
    5.5311202     2    7.1100000

```

\*

\*

```

cd def2-QZVPP
# cd (10s8p7d4f2g) / [7s5p4d4f2g] {41111111/411111/41111/1111/11}
*

```

```

4 s
269.30016289    0.62688949336E-03
18.554269093   -0.43456616075
16.729943183    0.66043072415
11.768546646   -0.11793513277
1 s
6.1816604427    1.00000000000
1 s
1.5775743989    1.00000000000
1 s
0.71857981187    1.00000000000
1 s
0.16433138409    1.00000000000
1 s
0.76794158768E-01 1.00000000000
1 s
0.34377199848E-01 1.00000000000
4 p
14.107678180    0.70307291426E-01
8.2750040714   -0.26474818030
2.2507338323    0.47494851120
1.1914970238    0.46327020832
1 p
0.66041257699    1.00000000000
1 p
0.33804403770    1.00000000000
1 p
0.96004037879E-01 1.00000000000
1 p
0.33681030012E-01 1.00000000000
4 d
35.689192548    0.44455913982E-02
9.3407971610   -0.39185351747E-01
3.5922659140    0.31235972097
1.7980676976    0.71163739606
1 d
0.84830057791    1.00000000000
1 d
0.37846492753    1.00000000000
1 d
0.15420101631    1.00000000000
1 f
4.7689900000    1.00000000000
1 f
1.5981300000    1.00000000000

```

```

1 f
0.53555000000 1.0000000000
1 f
0.17947000000 1.0000000000
1 g
2.9414200000 1.0000000000
1 g
1.0371000000 1.0000000000
*
cd def2-ecp
*
ncore = 28 lmax = 3
# coefficient r^n exponent
f
-35.4766256 2 15.1847957
-5.6176768 2 7.5923978
s-f
270.0094832 2 13.8358689
38.7673080 2 6.8572704
35.4766256 2 15.1847957
5.6176768 2 7.5923978
p-f
193.8296294 2 12.4049710
31.8965252 2 6.5677995
35.4766256 2 15.1847957
5.6176768 2 7.5923978
d-f
79.1936470 2 10.8969253
13.2308267 2 4.6411649
35.4766256 2 15.1847957
5.6176768 2 7.5923978
*
*
in def2-QZVPP
# in (17s14p11d4f1g) / [7s6p4d4f1g] {9131111/731111/8111/1111/1}
*
9 s
8931.8400000 0.19000000000E-04
1352.2200000 0.13100000000E-03
303.39300000 0.47800000000E-03
45.122900000 0.11708000000E-01
28.182200000 -0.87330000000E-01
17.604800000 0.25957700000
6.9405800000 -0.62847100000
4.3337700000 -0.15871800000
1.9868400000 0.67440400000
1 s
1.0438672413 1.0000000000
3 s
20.245544208 0.29650296199E-01
11.072298416 -0.14745372687
2.4929238916 0.53232061960
1 s
0.53244484157 1.0000000000
1 s
0.21211307407 1.0000000000
1 s
0.95475196519E-01 1.0000000000
1 s
0.42357644919E-01 1.0000000000

```

|                    |                     |  |
|--------------------|---------------------|--|
| 7 p                |                     |  |
| 129.23300000       | 0.279000000000E-03  |  |
| 29.628400000       | -0.617100000000E-02 |  |
| 18.521100000       | 0.469120000000E-01  |  |
| 8.2853600000       | -0.23990400000      |  |
| 2.4993900000       | 0.42981100000       |  |
| 1.3221600000       | 0.48610100000       |  |
| 0.68870700000      | 0.22203700000       |  |
| 3 p                |                     |  |
| 13.248633034       | -0.18203004609E-01  |  |
| 3.0240161259       | 0.31476939453       |  |
| 1.0805448379       | 0.71919648136       |  |
| 1 p                |                     |  |
| 0.33353581509      | 1.0000000000        |  |
| 1 p                |                     |  |
| 0.15403760449      | 1.0000000000        |  |
| 1 p                |                     |  |
| 0.65770424632E-01  | 1.0000000000        |  |
| 1 p                |                     |  |
| 0.27642180293E-01  | 1.0000000000        |  |
| 8 d                |                     |  |
| 131.81131820       | 0.22281463414E-03   |  |
| 37.030875816       | 0.19331306797E-02   |  |
| 11.378665218       | -0.17870304080E-01  |  |
| 6.4488212086       | 0.22953424346E-01   |  |
| 3.4878752216       | 0.17536747821       |  |
| 1.9912337572       | 0.29288830616       |  |
| 1.1306610212       | 0.31018960851       |  |
| 0.63074842914      | 0.24247651565       |  |
| 1 d                |                     |  |
| 0.33856463907      | 1.0000000000        |  |
| 1 d                |                     |  |
| 0.17026198815      | 1.0000000000        |  |
| 1 d                |                     |  |
| 0.692000000000E-01 | 1.0000000000        |  |
| 1 f                |                     |  |
| 0.39210000000      | 1.0000000000        |  |
| 1 f                |                     |  |
| 0.15600000000      | 1.0000000000        |  |
| 1 f                |                     |  |
| 1.3983200000       | 1.0000000000        |  |
| 1 f                |                     |  |
| 4.1949600000       | 1.0000000000        |  |
| 1 g                |                     |  |
| 0.34190000000      | 1.0000000000        |  |

```

*
in def2-ecp
*
ncore = 28      lmax = 3
#      coefficient  r^n      exponent
f
      -13.7280780    2      12.5390560
      -18.2068660    2      12.5525610
s-f
      281.1223500    2      15.3928220
      61.9014700    2      8.0558640
      13.7280780    2      12.5390560
      18.2068660    2      12.5525610
p-f
      67.4621540    2      13.9286720

```

|     |             |   |            |
|-----|-------------|---|------------|
|     | 134.9492500 | 2 | 13.3472340 |
|     | 14.7461400  | 2 | 7.6141320  |
|     | 29.6392620  | 2 | 7.3183650  |
|     | 13.7280780  | 2 | 12.5390560 |
|     | 18.2068660  | 2 | 12.5525610 |
| d-f |             |   |            |
|     | 35.4932540  | 2 | 14.0347150 |
|     | 53.1787730  | 2 | 14.5116160 |
|     | 9.1772810   | 2 | 5.5505500  |
|     | 12.3924100  | 2 | 5.0594150  |
|     | 13.7280780  | 2 | 12.5390560 |
|     | 18.2068660  | 2 | 12.5525610 |

\*

\*

sn def2-QZVPP

# sn (17s14p11d4f1g) / [7s6p4d4f1g] {9131111/731111/8111/1111/1}

\*

|                   |   |                     |  |
|-------------------|---|---------------------|--|
| 9                 | s |                     |  |
| 11606.900000      |   | 0.290000000000E-04  |  |
| 1754.8000000      |   | 0.206000000000E-03  |  |
| 397.17800000      |   | 0.807000000000E-03  |  |
| 90.299000000      |   | 0.247100000000E-02  |  |
| 31.489000000      |   | -0.400250000000E-01 |  |
| 19.668500000      |   | 0.16315200000       |  |
| 7.0675900000      |   | -0.55698300000      |  |
| 4.4149000000      |   | -0.16993200000      |  |
| 2.1635600000      |   | 0.65102800000       |  |
| 1                 | s |                     |  |
| 1.1440977736      |   | 1.0000000000        |  |
| 3                 | s |                     |  |
| 20.197961274      |   | 0.22393937317E-01   |  |
| 10.880108426      |   | -0.14330764814      |  |
| 2.7745387028      |   | 0.53278527074       |  |
| 1                 | s |                     |  |
| 0.58550056279     |   | 1.0000000000        |  |
| 1                 | s |                     |  |
| 0.25317089836     |   | 1.0000000000        |  |
| 1                 | s |                     |  |
| 0.11599461634     |   | 1.0000000000        |  |
| 1                 | s |                     |  |
| 0.52233584109E-01 |   | 1.0000000000        |  |
| 7                 | p |                     |  |
| 195.49500000      |   | 0.258000000000E-03  |  |
| 18.256300000      |   | 0.443410000000E-01  |  |
| 11.409400000      |   | -0.10914200000      |  |
| 6.9056700000      |   | -0.13860600000      |  |
| 2.9820600000      |   | 0.34374300000       |  |
| 1.6084300000      |   | 0.51827100000       |  |
| 0.83176700000     |   | 0.27870600000       |  |
| 3                 | p |                     |  |
| 13.304065745      |   | -0.20694775410E-01  |  |
| 3.4193503621      |   | 0.33654593033       |  |
| 1.2382899573      |   | 0.71397757129       |  |
| 1                 | p |                     |  |
| 0.39265300321     |   | 1.0000000000        |  |
| 1                 | p |                     |  |
| 0.19313059747     |   | 1.0000000000        |  |
| 1                 | p |                     |  |
| 0.86443518729E-01 |   | 1.0000000000        |  |
| 1                 | p |                     |  |



```

0.37350684674E-01  1.0000000000
 8 d
143.82134199      0.26165602862E-03
41.039940764      0.21562117321E-02
11.508999207      -0.24771286642E-01
8.4312612820      0.29022163379E-01
4.0180001346      0.16171344601
2.3122021836      0.29213521578
1.3168562511      0.32241037254
0.73729126651     0.24629433031
 1 d
0.40109472811     1.0000000000
 1 d
0.20593354535     1.0000000000
 1 d
0.866000000000E-01 1.0000000000
 1 f
0.43150000000     1.0000000000
 1 f
0.17720000000     1.0000000000
 1 f
1.5915400000      1.0000000000
 1 f
4.7988893935      1.0000000000
 1 g
0.37740000000     1.0000000000
*
sn def2-ecp
*
  ncore =    28          lmax =    3
#      coefficient      r^n      exponent
f
      -12.5763330      2          12.2823480
      -16.5959440      2          12.2721500
s-f
      279.9886820      2          17.4204140
      62.3778100      2           7.6311550
      12.5763330      2          12.2823480
      16.5959440      2          12.2721500
p-f
      66.1625230      2          16.1310240
      132.1743960      2          15.6280770
      16.3394170      2           7.3256080
      32.4889590      2           6.9425190
      12.5763330      2          12.2823480
      16.5959440      2          12.2721500
d-f
      36.3874410      2          15.5149760
      54.5078410      2          15.1881600
      8.6968230      2           5.4560240
      12.8402080      2           5.3631050
      12.5763330      2          12.2823480
      16.5959440      2          12.2721500
*
*
sb def2-QZVPP
# sb      (17s14p11d4f1g) / [7s6p4d4f1g]      {9131111/731111/8111/1111/1}
*
  9 s
12339.316555      0.38545231046E-04

```

|                   |                    |
|-------------------|--------------------|
| 1854.7043271      | 0.27702166404E-03  |
| 418.44441772      | 0.11161923778E-02  |
| 96.965111109      | 0.28828055377E-02  |
| 28.537960267      | -0.60556405021E-01 |
| 17.862907144      | 0.27988835315      |
| 8.4541754812      | -0.54748479396     |
| 5.2813981306      | -0.30336289748     |
| 2.3194618632      | 0.68093278701      |
| 1 s               |                    |
| 1.2167512076      | 1.0000000000       |
| 3 s               |                    |
| 25.336266601      | 0.22414355064E-01  |
| 12.477043309      | -0.14737811818     |
| 3.0723142741      | 0.53278468779      |
| 1 s               |                    |
| 0.60174774699     | 1.0000000000       |
| 1 s               |                    |
| 0.28323936354     | 1.0000000000       |
| 1 s               |                    |
| 0.13221765728     | 1.0000000000       |
| 1 s               |                    |
| 0.60986718951E-01 | 1.0000000000       |
| 7 p               |                    |
| 162.89300000      | 0.37500000000E-03  |
| 30.399600000      | -0.47980000000E-02 |
| 19.000400000      | 0.54731000000E-01  |
| 9.3225600000      | -0.25528400000     |
| 3.0166800000      | 0.34537700000      |
| 1.8621900000      | 0.40483300000      |
| 1.1033100000      | 0.32592200000      |
| 3 p               |                    |
| 12.665326113      | -0.20694788562E-01 |
| 3.3473442879      | 0.26878411014      |
| 1.1722158971      | 0.72590523998      |
| 1 p               |                    |
| 0.58886745483     | 1.0000000000       |
| 1 p               |                    |
| 0.25014249608     | 1.0000000000       |
| 1 p               |                    |
| 0.11120161090     | 1.0000000000       |
| 1 p               |                    |
| 0.48206685448E-01 | 1.0000000000       |
| 8 d               |                    |
| 142.61790051      | 0.34691704136E-03  |
| 40.920334292      | 0.27417583490E-02  |
| 10.854520545      | -0.33847404142E-01 |
| 8.3926457719      | 0.42753986065E-01  |
| 4.1806878019      | 0.16545099365      |
| 2.5346474124      | 0.26821979719      |
| 1.5175455555      | 0.31482077294      |
| 0.86799625994     | 0.25485913704      |
| 1 d               |                    |
| 0.47323070711     | 1.0000000000       |
| 1 d               |                    |
| 0.24111763234     | 1.0000000000       |
| 1 d               |                    |
| 0.10080000000     | 1.0000000000       |
| 1 f               |                    |
| 0.48490000000     | 1.0000000000       |
| 1 f               |                    |

```

0.20490000000    1.0000000000
  1 f
1.7880600000    1.0000000000
  1 f
5.6265581363    1.0000000000
  1 g
0.42340000000    1.0000000000
*
sb def2-ecp
*
  ncore =    28          lmax =    3
#      coefficient      r^n          exponent
f
      -15.3668010      2          14.4449780
      -20.2961380      2          14.4492950
s-f
      281.0715810      2          16.3308650
      61.7166040      2          8.5565420
      15.3668010      2          14.4449780
      20.2961380      2          14.4492950
p-f
      67.4573800      2          14.4703370
      134.9335030      2          13.8161940
      14.7163440      2          8.4249240
      29.5185120      2          8.0927280
      15.3668010      2          14.4449780
      20.2961380      2          14.4492950
d-f
      35.4478150      2          14.8863310
      53.1434660      2          15.1463190
      9.1792230      2          5.9082670
      13.2402530      2          5.5943220
      15.3668010      2          14.4449780
      20.2961380      2          14.4492950
*
*
te def2-QZVPP
# te      (17s14p11d4f1g) / [7s6p4d4f1g]      {9131111/731111/8111/1111/1}
*
  9 s
15746.300000    0.540000000000E-04
2369.2500000    0.398000000000E-03
535.86000000    0.166200000000E-02
141.88500000    0.363600000000E-02
27.819700000    -0.584270000000E-01
17.387900000    0.366520000000
10.865600000    -0.397589000000
6.5688500000    -0.519175000000
2.4013900000    0.687652000000
  1 s
1.2865441585    1.0000000000
  3 s
29.383253023    0.30079778033E-01
15.946408003    -0.13631630929
3.6679902632    0.53467574034
  1 s
0.63533594694    1.0000000000
  1 s
0.29807786206    1.0000000000
  1 s

```

```

0.14061248688      1.0000000000
 1 s
0.65660655893E-01  1.0000000000
 7 p
750.22200000      0.52000000000E-04
163.96100000      0.41000000000E-03
16.922700000      0.83387000000E-01
10.575500000     -0.26821200000
 5.7046200000     -0.22932000000E-01
 2.9802200000      0.49554800000
 1.5197000000      0.51452200000
 3 p
13.925457258     -0.21336842159E-01
 4.2323766654      0.22433961554
 1.4547630727      0.73198528158
 1 p
0.75528783692     1.0000000000
 1 p
0.31829451168     1.0000000000
 1 p
0.13721830923     1.0000000000
 1 p
0.57099171462E-01  1.0000000000
 8 d
146.30727119      0.43816018982E-03
42.243859354      0.33559305599E-02
 9.9155377745     -0.11157186771
 8.9949643607      0.13269569633
 4.1376628430      0.21574044755
 2.3659339431      0.32583679541
 1.3736141857      0.30685918052
0.79846379228     0.19445241192
 1 d
0.45685175394     1.0000000000
 1 d
0.25022747959     1.0000000000
 1 d
0.11560000000     1.0000000000
 1 f
0.51840000000     1.0000000000
 1 f
0.21350000000     1.0000000000
 1 f
 1.9347800000      1.0000000000
 1 f
 5.8043400000      1.0000000000
 1 g
0.42940000000     1.0000000000
*
te def2-ecp
*
ncore =      28          lmax =      3
#      coefficient    r^n      exponent
f      -15.7454500     2        15.2061680
      -20.7424480     2        15.2017020
s-f    281.0458430     2        16.8144730
      61.6206560     2         8.7935260
      15.7454500     2        15.2061680

```

|     |             |   |            |
|-----|-------------|---|------------|
|     | 20.7424480  | 2 | 15.2017020 |
| p-f | 67.4494640  | 2 | 14.8778010 |
|     | 134.9043040 | 2 | 14.2697310 |
|     | 14.6895470  | 2 | 8.7244350  |
|     | 29.4150630  | 2 | 8.2915150  |
|     | 15.7454500  | 2 | 15.2061680 |
|     | 20.7424480  | 2 | 15.2017020 |
| d-f | 35.4320570  | 2 | 15.2050080 |
|     | 53.1356870  | 2 | 15.2258480 |
|     | 9.0698020   | 2 | 6.0717690  |
|     | 13.1223040  | 2 | 5.8047600  |
|     | 15.7454500  | 2 | 15.2061680 |
|     | 20.7424480  | 2 | 15.2017020 |

\*

\*

i def2-QZVPP

# i (17s14p11d4f1g) / [7s6p4d4f1g] {9131111/731111/8111/1111/1}

\*

|                   |                     |  |
|-------------------|---------------------|--|
| 9 s               |                     |  |
| 16788.400000      | 0.410000000000E-04  |  |
| 2526.6400000      | 0.303000000000E-03  |  |
| 571.98400000      | 0.124700000000E-02  |  |
| 150.43400000      | 0.265900000000E-02  |  |
| 29.540500000      | -0.531900000000E-01 |  |
| 18.457100000      | 0.340096000000      |  |
| 11.528600000      | -0.352355000000     |  |
| 7.0828900000      | -0.541385000000     |  |
| 2.5040500000      | 0.715749000000      |  |
| 1 s               |                     |  |
| 1.3540144781      | 1.000000000000      |  |
| 3 s               |                     |  |
| 25.058617933      | 0.40897754402E-01   |  |
| 15.621979372      | -0.14269668187      |  |
| 3.3536325162      | 0.52916319279       |  |
| 1 s               |                     |  |
| 0.67430472704     | 1.000000000000      |  |
| 1 s               |                     |  |
| 0.32727136949     | 1.000000000000      |  |
| 1 s               |                     |  |
| 0.15749364119     | 1.000000000000      |  |
| 1 s               |                     |  |
| 0.74377727841E-01 | 1.000000000000      |  |
| 7 p               |                     |  |
| 656.27400000      | 0.910000000000E-04  |  |
| 149.23200000      | 0.613000000000E-03  |  |
| 19.015300000      | 0.599230000000E-01  |  |
| 10.737800000      | -0.249258000000     |  |
| 6.4420800000      | -0.437500000000E-02 |  |
| 3.0920300000      | 0.513999000000      |  |
| 1.5787400000      | 0.507213000000      |  |
| 3 p               |                     |  |
| 15.660511893      | -0.22143803592E-01  |  |
| 4.9250669812      | 0.23518064355       |  |
| 1.6692319982      | 0.73153925548       |  |
| 1 p               |                     |  |
| 0.77817898176     | 1.000000000000      |  |
| 1 p               |                     |  |
| 0.35608843716     | 1.000000000000      |  |

```

1 p
0.15493242649      1.0000000000
1 p
0.64666212492E-01  1.0000000000
8 d
318.22407776      0.10951692560E-03
95.810227352      0.91919139268E-03
35.322295259      0.47916935207E-02
13.107447819      -0.16280459996E-01
6.2949152988      0.90889609141E-01
3.6826101201      0.27483543784
2.0858950647      0.36067901632
1.1644342344      0.28384002219
1 d
0.63180613129     1.0000000000
1 d
0.32215084697     1.0000000000
1 d
0.13490000000     1.0000000000
1 f
0.58780000000     1.0000000000
1 f
0.25000000000     1.0000000000
1 f
2.17800000000     1.0000000000
1 f
6.4253613600      1.0000000000
1 g
0.47390000000     1.0000000000

```

```

*
i def2-ecp
*
ncore =      28          lmax =      3
#      coefficient      r^n      exponent
f
      -21.8420400      2          19.4586090
      -28.4681910      2          19.3492600
      -0.2437130      2           4.8237670
      -0.3208040      2           4.8843150
s-f
      49.9942930      2          40.0158350
      281.0253170      2          17.4297470
      61.5733260      2           9.0054840
      21.8420400      2          19.4586090
      28.4681910      2          19.3492600
      0.2437130      2           4.8237670
      0.3208040      2           4.8843150
p-f
      67.4428410      2          15.3554660
      134.8811370      2          14.9718330
      14.6750510      2           8.9601640
      29.3756660      2           8.2590960
      21.8420400      2          19.4586090
      28.4681910      2          19.3492600
      0.2437130      2           4.8237670
      0.3208040      2           4.8843150
d-f
      35.4395290      2          15.0689080
      53.1760570      2          14.5553220
      9.0671950      2           6.7186470

```

|            |   |            |
|------------|---|------------|
| 13.2069370 | 2 | 6.4563930  |
| 0.0893350  | 2 | 1.1917790  |
| 0.0523800  | 2 | 1.2911570  |
| 21.8420400 | 2 | 19.4586090 |
| 28.4681910 | 2 | 19.3492600 |
| 0.2437130  | 2 | 4.8237670  |
| 0.3208040  | 2 | 4.8843150  |

\*  
\*

xe def2-QZVPP

# xe (17s14p11d4f1g) / [7s6p4d4f1g] {9131111/731111/8111/1111/1}

\*

|                   |                     |
|-------------------|---------------------|
| 9 s               |                     |
| 18774.300000      | 0.680000000000E-04  |
| 2824.8100000      | 0.501000000000E-03  |
| 640.08800000      | 0.209700000000E-02  |
| 172.61600000      | 0.449300000000E-02  |
| 29.516900000      | -0.471510000000E-01 |
| 18.444800000      | 0.374033000000      |
| 11.523800000      | -0.512826000000     |
| 6.6189000000      | -0.478624000000     |
| 2.9955200000      | 0.596471000000      |
| 1 s               |                     |
| 1.6532586536      | 1.0000000000        |
| 3 s               |                     |
| 27.052171835      | 0.11189611954       |
| 20.940622415      | -0.24055422724      |
| 6.0024591071      | 0.51452076187       |
| 1 s               |                     |
| 0.87553889270     | 1.0000000000        |
| 1 s               |                     |
| 0.41033616654     | 1.0000000000        |
| 1 s               |                     |
| 0.19493585779     | 1.0000000000        |
| 1 s               |                     |
| 0.90171093041E-01 | 1.0000000000        |
| 7 p               |                     |
| 613.33100000      | 0.138000000000E-03  |
| 141.71000000      | 0.853000000000E-03  |
| 20.310600000      | 0.550240000000E-01  |
| 11.033100000      | -0.252988000000     |
| 6.8951300000      | 0.974600000000E-02  |
| 3.2416600000      | 0.526797000000      |
| 1.6653500000      | 0.501832000000      |
| 3 p               |                     |
| 18.388908413      | -0.24514446229E-01  |
| 6.1139045431      | 0.25265669670       |
| 1.8729815691      | 0.72938328969       |
| 1 p               |                     |
| 0.82004665991     | 1.0000000000        |
| 1 p               |                     |
| 0.39552648254     | 1.0000000000        |
| 1 p               |                     |
| 0.17445509815     | 1.0000000000        |
| 1 p               |                     |
| 0.73389992663E-01 | 1.0000000000        |
| 8 d               |                     |
| 315.66106865      | 0.14235585191E-03   |
| 95.553873651      | 0.11707875751E-02   |
| 35.451236301      | 0.58783160362E-02   |

```

13.153211283      -0.16764226287E-01
6.3847329564      0.11558421625
3.6968166410      0.30375919653
2.0976070364      0.36037726827
1.1951246616      0.24813434400
 1 d
0.68431725339      1.00000000000
 1 d
0.37710480204      1.00000000000
 1 d
0.16760000000      1.00000000000
 1 f
0.66190000000      1.00000000000
 1 f
0.29790000000      1.00000000000
 1 f
2.43230000000      1.00000000000
 1 f
7.2077391789      1.00000000000
 1 g
0.52780000000      1.00000000000

```

```

*
xe def2-ecp

```

```

*
ncore =      28          lmax =      3
# coefficient  r^n      exponent
f
-23.0892950    2          20.8815570
-30.0744750    2          20.7834430
-0.2882270     2          5.2533890
-0.3869240     2          5.3611880
s-f
49.9979620    2          40.0051840
281.0133030   2          17.8122140
61.5382550    2          9.3041500
23.0892950    2          20.8815570
30.0744750    2          20.7834430
0.2882270     2          5.2533890
0.3869240     2          5.3611880
p-f
67.4391420    2          15.7017720
134.8747110   2          15.2586080
14.6633000    2          9.2921840
29.3547300    2          8.5590030
23.0892950    2          20.8815570
30.0744750    2          20.7834430
0.2882270     2          5.2533890
0.3869240     2          5.3611880
d-f
35.4369080    2          15.1856000
53.1957720    2          14.2845000
9.0462320     2          7.1218890
13.2236810    2          6.9919630
0.0848530     2          0.6239460
0.0441550     2          0.6472840
23.0892950    2          20.8815570
30.0744750    2          20.7834430
0.2882270     2          5.2533890
0.3869240     2          5.3611880

```

```

*
```



```

*
cs def2-QZVPP
# cs      (8s7p5d3f) / [6s5p3d3f]      {311111/31111/311/111}
*
  3 s
  5.8684829520      0.12906631816
  4.3741038860     -0.34380446158
  1.7951201473      0.69937346606
  1 s
  0.37816941125      1.00000000000
  1 s
  0.16624693130      1.00000000000
  1 s
  0.27763176052E-01  1.00000000000
  1 s
  0.16113005842E-01  1.00000000000
  1 s
  0.10996108743E-01  1.00000000000
  3 p
  4.2749775718      0.45595316685E-01
  1.9639316240     -0.25031125651
  0.47666322385      0.55660114378
  1 p
  0.21736718772      1.00000000000
  1 p
  0.97276293828E-01  1.00000000000
  1 p
  0.26770518041E-01  1.00000000000
  1 p
  0.10845412222E-01  1.00000000000
  3 d
  2.0091044335     -0.34453182058E-02
  0.35778351451      0.22686596025
  0.11070568254      0.47180885981
  1 d
  0.33216214821E-01  1.00000000000
  1 d
  0.11409380652E-01  1.00000000000
  1 f
  0.70000000000E-01  0.00000000000
  1 f
  0.34933000000      0.00000000000
  1 f
  0.84693000000      0.00000000000
*
cs def2-ecp
*
  ncore =    46      lmax =    3
#      coefficient  r^n      exponent
f
  -28.8843090      2      3.1232690
s-f
  84.5477300      2      4.0797500
  16.6541730      2      2.4174060
  28.8843090      2      3.1232690
p-f
  157.0490590     2      5.5140800
  26.4233070      2      2.1603160
  28.8843090      2      3.1232690
d-f

```

|  |            |   |           |
|--|------------|---|-----------|
|  | 13.1727530 | 2 | 1.8074100 |
|  | 3.3428330  | 2 | 0.8581820 |
|  | 28.8843090 | 2 | 3.1232690 |

\*  
\*

ba def2-QZVPP  
# ba (8s8p5d3f) / [7s5p3d3f] {2111111/41111/311/111}

\*  
2 s  
5.7000000000 1.3292982002  
5.2043612469 -1.7367497134  
1 s  
2.1475437282 1.0000000000  
1 s  
0.41033660537 1.0000000000  
1 s  
0.18393532770 1.0000000000  
1 s  
0.72521216545E-01 1.0000000000  
1 s  
0.34526334903E-01 1.0000000000  
1 s  
0.16157891872E-01 1.0000000000  
4 p  
5.6000000000 0.51385026013  
5.1104879274 -0.70529238864  
2.5006544803 0.42822329830  
0.51947995345 -0.57125984472  
1 p  
0.24536994841 1.0000000000  
1 p  
0.11256056700 1.0000000000  
1 p  
0.34917622027E-01 1.0000000000  
1 p  
0.16320065666E-01 1.0000000000  
3 d  
2.7000000000 0.14372069824  
2.3460740881 -0.19565347309  
0.39553542609 0.29963058552  
1 d  
0.12967935859 1.0000000000  
1 d  
0.40463066544E-01 1.0000000000  
1 f  
0.87880000000E-01 0.0000000000  
1 f  
0.36590000000 0.0000000000  
1 f  
0.87310000000 0.0000000000

\*  
ba def2-ecp  
\*  
ncore = 46 lmax = 3  
# coefficient r^n exponent  
f -33.4731740 2 3.5894650  
s-f 427.8458160 2 9.5269860  
204.4175300 2 4.4875100

|     |             |   |           |
|-----|-------------|---|-----------|
|     | 33.4731740  | 2 | 3.5894650 |
| p-f | 293.6058640 | 2 | 8.3159300 |
|     | 294.1933160 | 2 | 4.2922170 |
|     | 33.4731740  | 2 | 3.5894650 |
| d-f | 112.5504020 | 2 | 5.9161080 |
|     | 181.7826210 | 2 | 2.8748420 |
|     | 33.4731740  | 2 | 3.5894650 |

\*

\*

la def2-QZVPP

# la (9s8p6d3f2g) / [7s5p4d3f2g] {31111111/41111/3111/111/11}

\*

|                   |   |                    |  |
|-------------------|---|--------------------|--|
| 3                 | s |                    |  |
| 26.077272000      |   | 0.23198684846E-02  |  |
| 5.7127838000      |   | -0.29787719611     |  |
| 4.4057848000      |   | 0.70022722515      |  |
| 1                 | s |                    |  |
| 2.1315325829      |   | 1.0000000000       |  |
| 1                 | s |                    |  |
| 0.49385808956     |   | 1.0000000000       |  |
| 1                 | s |                    |  |
| 0.23595687888     |   | 1.0000000000       |  |
| 1                 | s |                    |  |
| 0.63593489661E-01 |   | 1.0000000000       |  |
| 1                 | s |                    |  |
| 0.31545394754E-01 |   | 1.0000000000       |  |
| 1                 | s |                    |  |
| 0.15777655296E-01 |   | 1.0000000000       |  |
| 4                 | p |                    |  |
| 6.0000000000      |   | -0.11397960924E-01 |  |
| 3.6808191615      |   | 0.14675038550      |  |
| 2.3265462081      |   | -0.35581819167     |  |
| 0.64342629633     |   | 0.45834955229      |  |
| 1                 | p |                    |  |
| 0.33584281962     |   | 1.0000000000       |  |
| 1                 | p |                    |  |
| 0.16519051916     |   | 1.0000000000       |  |
| 1                 | p |                    |  |
| 0.56715971797E-01 |   | 1.0000000000       |  |
| 1                 | p |                    |  |
| 0.22100824776E-01 |   | 1.0000000000       |  |
| 3                 | d |                    |  |
| 1.2000000000      |   | -0.35803482414     |  |
| 1.0239524401      |   | 0.40483734122      |  |
| 0.37508490282     |   | 0.37649639849      |  |
| 1                 | d |                    |  |
| 0.17161940245     |   | 1.0000000000       |  |
| 1                 | d |                    |  |
| 0.78780423402E-01 |   | 1.0000000000       |  |
| 1                 | d |                    |  |
| 0.35000047794E-01 |   | 1.0000000000       |  |
| 1                 | f |                    |  |
| 0.65580000000     |   | 1.0000000000       |  |
| 1                 | f |                    |  |
| 0.25683000000     |   | 1.0000000000       |  |
| 1                 | f |                    |  |
| 0.10058000000     |   | 1.0000000000       |  |
| 1                 | g |                    |  |

```

0.33218000000      1.0000000000
  1 g
0.13538000000      1.0000000000
*
la def2-ecp
*
  ncore =    46          lmax =    3
#   coefficient   r^n      exponent
f
  -36.0100160     2         4.0286000
s-f
  91.9321770     2         3.3099000
  -3.7887640     2         1.6550000
  36.0100160     2         4.0286000
p-f
  63.7594860     2         2.8368000
  -0.6479580     2         1.4184000
  36.0100160     2         4.0286000
d-f
  36.1161730     2         2.0213000
  0.2191140     2         1.0107000
  36.0100160     2         4.0286000
*
*
hf def2-QZVPP
# hf   (10s8p6d3f2g) / [7s5p4d3f2g]      {41111111/41111/3111/111/11}
*
  4 s
  24.000000000    0.19369448644
  16.000000000    -3.5064630782
  14.400000000    4.3082581000
  10.304504667    -0.91045809742
  1 s
  3.8372797792    1.0000000000
  1 s
  0.94649028050    1.0000000000
  1 s
  0.44397931299    1.0000000000
  1 s
  0.13656009445    1.0000000000
  1 s
  0.66549732509E-01  1.0000000000
  1 s
  0.28719110054E-01  1.0000000000
  4 p
  17.000000000    -0.30316491880E-01
  11.738072097    0.10139279686
  4.9203967161    -0.28227924657
  1.1251726138    0.52032008501
  1 p
  0.54220114055    1.0000000000
  1 p
  0.25659447877    1.0000000000
  1 p
  0.10000000000    1.0000000000
  1 p
  0.41700000000E-01  1.0000000000
  3 d
  6.9644775309    0.90606952386E-01
  5.7275227587    -0.16459899714

```

```

1.1503305416      0.51375718250
 1 d
0.47559482991    0.97807169690
 1 d
0.18774414759    1.00000000000
 1 d
0.68439488104E-01 1.00000000000
 1 f
0.80387000000    1.00000000000
 1 f
0.31547000000    1.00000000000
 1 f
0.12380000000    1.00000000000
 1 g
0.48820000000    1.00000000000
 1 g
0.18926000000    1.00000000000
*
hf def2-ecp
*
  ncore =      60      lmax =      3
#      coefficient  r^n      exponent
f
      10.0467225    2      1.7857698
s-f
      1499.2847107  2      14.7699590
      40.2821014   2      7.3849794
      -10.0467225  2      1.7857698
p-f
      397.7330053   2      9.8494895
      19.3164059   2      4.9247445
      -10.0467225  2      1.7857698
d-f
      101.3298053   2      6.0967564
      5.8734382    2      3.0483782
      -10.0467225  2      1.7857698
*
*
ta def2-QZVPP
# ta      (10s8p6d3f2g) / [7s5p4d3f2g]      {4111111/41111/3111/111/11}
*
  4 s
24.473650944      0.20537515818
18.721372549      -0.74477445680
11.500000000      3.4067771001
10.350000000      -2.8222400335
 1 s
 3.8125414615      1.00000000000
 1 s
 1.0507430630      1.00000000000
 1 s
0.49732275755      1.00000000000
 1 s
0.15602650970      1.00000000000
 1 s
0.75056442354E-01 1.00000000000
 1 s
0.31632668803E-01 1.00000000000
 4 p
17.000000000      -0.32577305616E-01

```

```

12.008186536      0.10336287365
5.0278760583     -0.28526521696
1.1937124184     0.51790141155
  1 p
0.57889707053    1.00000000000
  1 p
0.27225198801    1.00000000000
  1 p
0.10000000000    1.00000000000
  1 p
0.41700000000E-01 1.00000000000
  3 d
  7.1419762952    0.88606814221E-01
  5.7696869171    -0.17156962221
  1.2199483941    0.53547693505
  1 d
0.52366034246    1.00000000000
  1 d
0.21384808767    1.00000000000
  1 d
0.80254256735E-01 1.00000000000
  1 f
0.95070000000    1.00000000000
  1 f
0.37386000000    1.00000000000
  1 f
0.14702000000    1.00000000000
  1 g
0.65777000000    1.00000000000
  1 g
0.24314000000    1.00000000000
*
ta def2-ecp
*
  ncore =      60          lmax =      3
#   coefficient   r^n      exponent
f
      12.0179609      2          2.0178811
s-f
      1345.8806470      2          14.5464077
      36.7668062       2          7.2732038
      -12.0179609      2          2.0178811
p-f
      378.4253015      2          9.9355653
      22.2930909       2          4.9677824
      -12.0179609      2          2.0178811
d-f
      104.8839557      2          6.3473769
      8.7558481        2          3.1736885
      -12.0179609      2          2.0178811
*
*
w def2-QZVPP
# w      (10s8p6d3f2g) / [7s5p4d3f2g]      {4111111/41111/3111/111/11}
*
  4 s
22.106487883     0.66320504570
18.958062620     -1.5576189160
13.128699049     2.1416485467
10.149417378     -1.1823364947

```

|                   |                    |        |            |
|-------------------|--------------------|--------|------------|
| 1 s               |                    |        |            |
| 4.0160322414      | 1.0000000000       |        |            |
| 1 s               |                    |        |            |
| 1.1234496158      | 1.0000000000       |        |            |
| 1 s               |                    |        |            |
| 0.53500662821     | 1.0000000000       |        |            |
| 1 s               |                    |        |            |
| 0.17127449658     | 1.0000000000       |        |            |
| 1 s               |                    |        |            |
| 0.80452897876E-01 | 1.0000000000       |        |            |
| 1 s               |                    |        |            |
| 0.33669872229E-01 | 1.0000000000       |        |            |
| 4 p               |                    |        |            |
| 17.000000000      | -0.37817768433E-01 |        |            |
| 12.431973432      | 0.10905673845      |        |            |
| 5.1586217658      | -0.29399955020     |        |            |
| 1.2801454812      | 0.51560726697      |        |            |
| 1 p               |                    |        |            |
| 0.62856790898     | 1.0000000000       |        |            |
| 1 p               |                    |        |            |
| 0.29380423553     | 1.0000000000       |        |            |
| 1 p               |                    |        |            |
| 0.10000000000     | 1.0000000000       |        |            |
| 1 p               |                    |        |            |
| 0.41700000000E-01 | 1.0000000000       |        |            |
| 3 d               |                    |        |            |
| 7.4064737315      | 0.86993963018E-01  |        |            |
| 5.9026268603      | -0.17667540011     |        |            |
| 1.2984756750      | 0.55145697030      |        |            |
| 1 d               |                    |        |            |
| 0.57153508541     | 1.0000000000       |        |            |
| 1 d               |                    |        |            |
| 0.23845526606     | 1.0000000000       |        |            |
| 1 d               |                    |        |            |
| 0.91144267331E-01 | 1.0000000000       |        |            |
| 1 f               |                    |        |            |
| 1.0962400000      | 1.0000000000       |        |            |
| 1 f               |                    |        |            |
| 0.43199000000     | 1.0000000000       |        |            |
| 1 f               |                    |        |            |
| 0.17023000000     | 1.0000000000       |        |            |
| 1 g               |                    |        |            |
| 0.84089000000     | 1.0000000000       |        |            |
| 1 g               |                    |        |            |
| 0.29702000000     | 1.0000000000       |        |            |
| *                 |                    |        |            |
| w def2-ecp        |                    |        |            |
| *                 |                    |        |            |
| ncore =           | 60                 | lmax = | 3          |
| #                 | coefficient        | r^n    | exponent   |
| f                 | 14.1525795         | 2      | 2.2588885  |
| s-f               | 1192.3958823       | 2      | 14.3228564 |
|                   | 32.5229332         | 2      | 7.1614281  |
|                   | -14.1525795        | 2      | 2.2588885  |
| p-f               | 359.0319671        | 2      | 10.0216411 |
|                   | 24.0303802         | 2      | 5.0108204  |
|                   | -14.1525795        | 2      | 2.2588885  |

```

d-f
      108.3013490    2          6.5979974
      10.9825283    2          3.2989987
      -14.1525795    2          2.2588885
*
*
re def2-QZVPP
# re      (10s8p6d4f2g) / [7s5p4d4f2g]      {41111111/411111/3111/1111/11}
*
      4 s
      24.000000000    0.26968047163
      18.204262749    -1.3559378623
      14.048192487    1.9003709759
      9.5166786954    -0.75626964015
      1 s
      4.1714667981    1.0000000000
      1 s
      1.1944213976    1.0000000000
      1 s
      0.56755447797    1.0000000000
      1 s
      0.17533854868    1.0000000000
      1 s
      0.82014250464E-01  1.0000000000
      1 s
      0.34607892740E-01  1.0000000000
      4 p
      18.000000000    -0.26890962397E-01
      12.318606250    0.99711498502E-01
      5.3719234505    -0.29289398145
      1.3506646748    0.51466301434
      1 p
      0.66212816808    1.0000000000
      1 p
      0.31071385193    1.0000000000
      1 p
      0.10800000000    1.0000000000
      1 p
      0.45000000000E-01  1.0000000000
      3 d
      7.7352877672    0.83901798556E-01
      6.0949443610    -0.17722258734
      1.3871105497    0.55238259692
      1 d
      0.62324027854    1.0000000000
      1 d
      0.26517328547    1.0000000000
      1 d
      0.10321096849    1.0000000000
      1 f
      1.2406000000    1.0000000000
      1 f
      0.48989000000    1.0000000000
      1 f
      0.19345000000    1.0000000000
      1 f
      0.76390000000E-01  1.0000000000
      1 g
      1.0375800000    1.0000000000
      1 g

```



```

0.35090000000      1.0000000000
*
re def2-ecp
*
ncore =      60      lmax =      3
# coefficient  r^n      exponent
f
      16.4498523      2      2.5086506
s-f
      1038.9515723      2      14.0993051
      29.5617383      2      7.0496525
      -16.4498523      2      2.5086506
p-f
      339.5435096      2      10.1077169
      24.9136965      2      5.0538583
      -16.4498523      2      2.5086506
d-f
      111.6996527      2      6.8486179
      12.6243293      2      3.4243090
      -16.4498523      2      2.5086506
*
*
os def2-QZVPP
# os      (10s8p6d4f2g) / [7s5p4d4f2g]      {4111111/41111/3111/1111/11}
*
  4 s
24.000000000      0.24559132972
18.204262749      -1.3020204925
14.048192487      1.9114896000
9.5166786954      -0.83098846799
  1 s
4.2529406042      1.0000000000
  1 s
1.2999583502      1.0000000000
  1 s
0.61756850127      1.0000000000
  1 s
0.18785305474      1.0000000000
  1 s
0.87865523960E-01      1.0000000000
  1 s
0.37004242944E-01      1.0000000000
  4 p
15.500000000      0.16016463376
14.000000000      -0.23201520402
5.5458290420      0.29772587274
1.4139502215      -0.54253238176
  1 p
0.68136686765      1.0000000000
  1 p
0.30911452647      1.0000000000
  1 p
0.90000000000E-01      1.0000000000
  1 p
0.33000000000E-01      1.0000000000
  3 d
8.5557226523      0.55081304746E-01
6.1927250845      -0.15041777374
1.4916733698      0.55087247584
  1 d

```

```

0.67423241512      1.0000000000
  1 d
0.28635737076      1.0000000000
  1 d
0.11074292707      1.0000000000
  1 f
  1.3802600000      1.0000000000
    1 f
0.55065000000      1.0000000000
  1 f
0.21968000000      1.0000000000
  1 f
0.87640000000E-01  1.0000000000
  1 g
  1.2249700000      1.0000000000
    1 g
0.42803000000      1.0000000000
*
os def2-ecp
*
  ncore =    60      lmax =    3
#      coefficient  r^n      exponent
f
      18.9094570    2        2.7670751
s-f
      885.4057191    2        13.8757539
      25.9670401    2        6.9378769
      -18.9094570    2        2.7670751
p-f
      320.0839019    2        10.1937926
      26.1487649    2        5.0968962
      -18.9094570    2        2.7670751
d-f
      115.0448431    2        7.0992385
      13.6225746    2        3.5496192
      -18.9094570    2        2.7670751
*
*
ir def2-QZVPP
# ir      (10s8p6d4f2g) / [7s5p4d4f2g]      {4111111/41111/3111/1111/11}
*
  4 s
23.465507222      0.71085679679
20.657091116      -1.5723547785
15.725107858      1.2938086001
 7.9297463605     -0.42980466966
  1 s
 4.5196120103      1.0000000000
  1 s
 1.3392891402      1.0000000000
  1 s
0.63692276928      1.0000000000
  1 s
0.19126770642      1.0000000000
  1 s
0.87881999015E-01  1.0000000000
  1 s
0.37643105533E-01  1.0000000000
  4 p
15.902664143      -0.16290720099

```

```

14.415830698      0.23483212987
5.7597608991     -0.30305337176
1.5008913108     0.55512982069
  1 p
0.72348035957    1.00000000000
  1 p
0.32785980328    1.00000000000
  1 p
0.910000000000E-01  1.00000000000
  1 p
0.350000000000E-01  1.00000000000
  3 d
8.9686781612     0.29754685954E-01
6.4456319498    -0.82246052942E-01
1.5835819740     0.29212392062
  1 d
0.71871917882    0.45371657855
  1 d
0.30539233284    0.35080208829
  1 d
0.11791405498    0.12106264000
  1 f
1.5134800000     1.00000000000
  1 f
0.61008000000    1.00000000000
  1 f
0.24592000000    1.00000000000
  1 f
0.991300000000E-01  1.00000000000
  1 g
1.3977000000     1.00000000000
  1 g
0.50516000000    1.00000000000
*
ir def2-ecp
*
  ncore =      60      lmax =      3
#      coefficient      r^n      exponent
f
      21.5310311      2      3.0340719
s-f
      732.2691998      2      13.6522026
      26.4847209      2      6.8261013
      -21.5310311      2      3.0340719
p-f
      299.4894736      2      10.2798684
      26.4662335      2      5.1399341
      -21.5310311      2      3.0340719
d-f
      124.4575945      2      7.3498590
      14.0359952      2      3.6749295
      -21.5310311      2      3.0340719
*
*
pt def2-QZVPP
# pt      (10s8p6d4f2g) / [7s5p4d4f2g]      {4111111/41111/3111/1111/11}
*
  4 s
23.465507222     0.55150926143
20.657091116     -1.2690274107

```

|                   |                    |
|-------------------|--------------------|
| 15.725107858      | 1.1215145470       |
| 7.9297463605      | -0.42250178029     |
| 1 s               |                    |
| 4.6667116243      | 1.0000000000       |
| 1 s               |                    |
| 1.4202522633      | 1.0000000000       |
| 1 s               |                    |
| 0.66786671541     | 1.0000000000       |
| 1 s               |                    |
| 0.19745059689     | 1.0000000000       |
| 1 s               |                    |
| 0.92573920368E-01 | 1.0000000000       |
| 1 s               |                    |
| 0.38895936899E-01 | 1.0000000000       |
| 4 p               |                    |
| 15.500000000      | -0.15672718629     |
| 14.000000000      | 0.23853412989      |
| 6.1161212339      | -0.31041379733     |
| 1.5715586385      | 0.56473525089      |
| 1 p               |                    |
| 0.75132510781     | 1.0000000000       |
| 1 p               |                    |
| 0.33306466812     | 1.0000000000       |
| 1 p               |                    |
| 0.91000000000E-01 | 1.0000000000       |
| 1 p               |                    |
| 0.35000000000E-01 | 1.0000000000       |
| 3 d               |                    |
| 8.3207937611      | 0.62945508668E-01  |
| 7.4207226520      | -0.90271154330E-01 |
| 1.6570410639      | 0.16812340903      |
| 1 d               |                    |
| 0.73943569960     | 1.0000000000       |
| 1 d               |                    |
| 0.30508290090     | 1.0000000000       |
| 1 d               |                    |
| 0.11350435924     | 1.0000000000       |
| 1 f               |                    |
| 1.6402500000      | 1.0000000000       |
| 1 f               |                    |
| 0.66813000000     | 1.0000000000       |
| 1 f               |                    |
| 0.27215000000     | 1.0000000000       |
| 1 f               |                    |
| 0.11086000000     | 1.0000000000       |
| 1 g               |                    |
| 1.5557500000      | 1.0000000000       |
| 1 g               |                    |
| 0.58228000000     | 1.0000000000       |
| *                 |                    |
| pt def2-ecp       |                    |
| *                 |                    |
| ncore = 60        | lmax = 3           |
| # coefficient r^n | exponent           |
| f                 |                    |
| 24.3143757        | 2 3.3095686        |
| s-f               |                    |
| 579.2238609       | 2 13.4286513       |
| 29.6694906        | 2 6.7143256        |
| -24.3143757       | 2 3.3095686        |

```

p-f      280.8607742    2      10.3659442
          26.7453820    2      5.1829721
          -24.3143757    2      3.3095686
d-f      120.3964443    2      7.6004795
          15.8109206    2      3.8002397
          -24.3143757    2      3.3095686
*
*
au def2-QZVPP
# au      (9s8p6d4f2g) / [7s5p4d4f2g]      {31111111/411111/3111/1111/11}
*
  3 s
  24.200000000      1.4645004443
  22.000000000      -3.9770190496
  20.000000000      2.7298033533
  1 s
  5.4043553001      1.0000000000
  1 s
  1.4532546773      1.0000000000
  1 s
  0.68294298420      1.0000000000
  1 s
  0.19002755303      1.0000000000
  1 s
  0.88155981740E-01  1.0000000000
  1 s
  0.37739555187E-01  1.0000000000
  4 p
  15.500000000      0.15001711880
  14.000000000      -0.23609813183
  6.4227368205      0.31458896948
  1.6595601681      -0.57279670446
  1 p
  0.79402913993      1.0000000000
  1 p
  0.35125155397      1.0000000000
  1 p
  0.81000000000E-01  1.0000000000
  1 p
  0.25000000000E-01  1.0000000000
  3 d
  8.6000000000      0.15361654684
  7.8531899379      -0.20443530663
  1.7650856798      0.30781811607
  1 d
  0.79482263260      1.0000000000
  1 d
  0.33085396360      1.0000000000
  1 d
  0.12398535801      1.0000000000
  1 f
  1.7607400000      1.0000000000
  1 f
  0.72482000000      1.0000000000
  1 f
  0.29838000000      1.0000000000
  1 f
  0.12283000000      1.0000000000

```

```

1 g
1.6991700000      1.0000000000
1 g
0.6594100000      1.0000000000
*
au def2-ecp
*
ncore =      60      lmax =      3
#      coefficient      r^n      exponent
f
      30.4900889      2      4.7898200
      5.1710738      2      2.3949100
s-f
      426.8466792      2      13.2051000
      37.0070829      2      6.6025500
      -30.4900889      2      4.7898200
      -5.1710738      2      2.3949100
p-f
      261.1995804      2      10.4520200
      26.9624960      2      5.2260100
      -30.4900889      2      4.7898200
      -5.1710738      2      2.3949100
d-f
      124.7906656      2      7.8511000
      16.3007257      2      3.9255500
      -30.4900889      2      4.7898200
      -5.1710738      2      2.3949100
*
*
hg def2-QZVPP
# hg      (9s8p7d4f2g) / [7s5p4d4f2g]      {31111111/41111/4111/1111/11}
*
3 s
48.013786990      0.56241403333E-02
21.239875095      -0.17054083503
15.876100879      0.35940389661
1 s
5.4865939429      1.0000000000
1 s
1.5521766895      1.0000000000
1 s
0.74742541187      1.0000000000
1 s
0.20268838483      1.0000000000
1 s
0.93376229211E-01      1.0000000000
1 s
0.41248705609E-01      1.0000000000
4 p
17.500000000      -0.86457187331E-01
15.252594855      0.15327318234
6.4404715169      -0.30274955249
1.8180159920      0.54361285026
1 p
0.90067981801      1.0000000000
1 p
0.41304540122      1.0000000000
1 p
0.11845702655      1.0000000000
1 p

```

```

0.36087619349E-01  1.0000000000
 4 d
11.888648987      0.13311219898E-01
6.7773660954     -0.73346199848E-01
2.0934941340     0.24155986719
1.0817087176     0.38865972362
 1 d
0.53329136060    1.0000000000
 1 d
0.24984101827    1.0000000000
 1 d
0.10879770063    1.0000000000
 1 f
1.8893800000     1.0000000000
 1 f
0.79569000000    1.0000000000
 1 f
0.33510000000    1.0000000000
 1 f
0.14112000000    1.0000000000
 1 g
1.8358500000     1.0000000000
 1 g
0.72249000000    1.0000000000
*
hg def2-ecp
*
  ncore =    60      lmax =    3
#      coefficient  r^n      exponent
f
      30.3649964    2        3.8857911
s-f
      275.7372117   2        12.9815487
      49.0892125    2        6.4907744
      -30.3649964   2        3.8857911
p-f
      241.5400740    2        10.5380958
      27.3965908    2        5.2690479
      -30.3649964   2        3.8857911
d-f
      127.8670076    2        8.1017205
      16.6083115    2        4.0508603
      -30.3649964   2        3.8857911
*
*
t1 def2-QZVPP
# t1      (17s14p10d4f1g) / [7s6p4d4f1g]      {9131111/731111/7111/1111/1}
*
 9 s
9675.550000      0.80000000000E-05
1471.480000      0.57000000000E-04
323.6480000      0.22700000000E-03
33.807900000     0.21666000000E-01
21.131600000     -0.19589700000
13.209100000     0.67362000000
8.2561100000     -0.57167600000
5.1001400000     -0.61234400000
1.8194300000     0.75954400000
 1 s
0.96804610176    1.0000000000

```

```

3 s
13.432924081      0.16050252545
11.126956705     -0.25827112953
2.0351129325     0.52570088358
1 s
0.47288027019    1.00000000000
1 s
0.21703241765    1.00000000000
1 s
0.99551664344E-01 1.00000000000
1 s
0.44674475181E-01 1.00000000000
7 p
42.524000000     0.16050000000E-02
21.395700000     -0.23159000000E-01
13.373700000     0.11173800000
6.6133700000    -0.34647200000
2.0421700000     0.47507300000
1.1144900000     0.48633500000
0.59800600000    0.20513900000
3 p
9.0557032031    -0.57376712693E-01
3.9424773914     0.27305802340
1.2382159385     0.72255078460
1 p
0.29943260745    1.00000000000
1 p
0.14250182360    1.00000000000
1 p
0.61655072518E-01 1.00000000000
1 p
0.26054870511E-01 1.00000000000
7 d
63.792149375     0.19539028558E-03
10.854099697     0.17775848298E-01
6.3885280565     -0.89213657526E-01
2.4120875010     0.18424406191
1.4246170706     0.30659722011
0.83496548780    0.31018961556
0.48634320397    0.23215648111
1 d
0.27592111650    1.00000000000
1 d
0.14737244064    1.00000000000
1 d
0.67700000000E-01 1.00000000000
1 f
0.42630000000    1.00000000000
1 f
0.16900000000    1.00000000000
1 f
1.0848100000     1.00000000000
1 f
2.3083704534     1.00000000000
1 g
0.36930000000    1.00000000000
*
t1 def2-ecp
*
ncore =      60          lmax =      3

```



| #             | coefficient                    | r^n                | exponent                     |
|---------------|--------------------------------|--------------------|------------------------------|
| f             | 15.8254880                     | 2                  | 5.6263990                    |
|               | 21.1040210                     | 2                  | 5.5489520                    |
|               | 2.9151270                      | 2                  | 2.8749460                    |
|               | 3.8969030                      | 2                  | 2.8214510                    |
| s-f           | 281.2846630                    | 2                  | 12.1678050                   |
|               | 62.4342510                     | 2                  | 8.2949090                    |
|               | -15.8254880                    | 2                  | 5.6263990                    |
|               | -21.1040210                    | 2                  | 5.5489520                    |
|               | -2.9151270                     | 2                  | 2.8749460                    |
|               | -3.8969030                     | 2                  | 2.8214510                    |
| p-f           | 4.6334080                      | 2                  | 7.1514920                    |
|               | 9.3417560                      | 2                  | 5.1728650                    |
|               | 72.2992530                     | 2                  | 9.8910720                    |
|               | 144.5580370                    | 2                  | 9.0033910                    |
|               | -15.8254880                    | 2                  | 5.6263990                    |
|               | -21.1040210                    | 2                  | 5.5489520                    |
|               | -2.9151270                     | 2                  | 2.8749460                    |
|               | -3.8969030                     | 2                  | 2.8214510                    |
| d-f           | 35.9430390                     | 2                  | 7.1302180                    |
|               | 53.9095930                     | 2                  | 6.9269060                    |
|               | 10.3819390                     | 2                  | 5.4175700                    |
|               | 15.5838220                     | 2                  | 5.1386810                    |
|               | -15.8254880                    | 2                  | 5.6263990                    |
|               | -21.1040210                    | 2                  | 5.5489520                    |
|               | -2.9151270                     | 2                  | 2.8749460                    |
|               | -3.8969030                     | 2                  | 2.8214510                    |
| *             |                                |                    |                              |
| *             |                                |                    |                              |
| pb def2-QZVPP |                                |                    |                              |
| # pb          | (17s14p10d4f1g) / [7s6p4d4f1g] |                    | {9131111/731111/7111/1111/1} |
| *             |                                |                    |                              |
| 9 s           |                                |                    |                              |
|               | 9368.3300000                   | 0.140000000000E-04 |                              |
|               | 1366.9300000                   | 0.103000000000E-03 |                              |
|               | 299.68200000                   | 0.379000000000E-03 |                              |
|               | 34.859700000                   | 0.232740000000E-01 |                              |
|               | 21.788900000                   | -0.20343600000     |                              |
|               | 13.620000000                   | 0.69921400000      |                              |
|               | 8.5129500000                   | -0.60684100000     |                              |
|               | 5.3033200000                   | -0.61139200000     |                              |
|               | 1.9281600000                   | 0.76522700000      |                              |
| 1 s           |                                |                    |                              |
|               | 1.0373400312                   | 1.0000000000       |                              |
| 3 s           |                                |                    |                              |
|               | 13.559944213                   | 0.15955164155      |                              |
|               | 11.039620045                   | -0.26750615828     |                              |
|               | 2.1371722788                   | 0.52500552105      |                              |
| 1 s           |                                |                    |                              |
|               | 0.51111685694                  | 1.0000000000       |                              |
| 1 s           |                                |                    |                              |
|               | 0.24673987563                  | 1.0000000000       |                              |
| 1 s           |                                |                    |                              |
|               | 0.11577976738                  | 1.0000000000       |                              |
| 1 s           |                                |                    |                              |
|               | 0.52874167812E-01              | 1.0000000000       |                              |

|                   |   |                    |  |
|-------------------|---|--------------------|--|
| 7                 | p |                    |  |
| 59.090100000      |   | 0.71600000000E-03  |  |
| 20.919700000      |   | -0.21082000000E-01 |  |
| 13.077700000      |   | 0.12706100000      |  |
| 6.8991000000      |   | -0.37228400000     |  |
| 2.1962700000      |   | 0.43566300000      |  |
| 1.3048600000      |   | 0.43573500000      |  |
| 0.77957200000     |   | 0.26094700000      |  |
| 3                 | p |                    |  |
| 9.1373183134      |   | -0.55319030476E-01 |  |
| 3.9570574249      |   | 0.27275707058      |  |
| 1.2246639098      |   | 0.72280340692      |  |
| 1                 | p |                    |  |
| 0.42601564238     |   | 1.0000000000       |  |
| 1                 | p |                    |  |
| 0.20378586294     |   | 1.0000000000       |  |
| 1                 | p |                    |  |
| 0.88168647885E-01 |   | 1.0000000000       |  |
| 1                 | p |                    |  |
| 0.37094701422E-01 |   | 1.0000000000       |  |
| 7                 | d |                    |  |
| 66.348248961      |   | 0.28507140251E-03  |  |
| 13.455899798      |   | 0.93352787747E-02  |  |
| 6.5510273149      |   | -0.75354763534E-01 |  |
| 2.6574136949      |   | 0.16674578725      |  |
| 1.6001278005      |   | 0.31208757936      |  |
| 0.93304454981     |   | 0.32900401823      |  |
| 0.54391365526     |   | 0.22655044022      |  |
| 1                 | d |                    |  |
| 0.32059545270     |   | 1.0000000000       |  |
| 1                 | d |                    |  |
| 0.17922304239     |   | 1.0000000000       |  |
| 1                 | d |                    |  |
| 0.83200000000E-01 |   | 1.0000000000       |  |
| 1                 | f |                    |  |
| 0.44130000000     |   | 1.0000000000       |  |
| 1                 | f |                    |  |
| 0.17820000000     |   | 1.0000000000       |  |
| 1                 | f |                    |  |
| 1.1606000000      |   | 1.0000000000       |  |
| 1                 | f |                    |  |
| 2.5184938758      |   | 1.0000000000       |  |
| 1                 | g |                    |  |
| 0.38810000000     |   | 1.0000000000       |  |

\*

pb def2-ecp

\*

|         |             |        |            |
|---------|-------------|--------|------------|
| ncore = | 60          | lmax = | 3          |
| #       | coefficient | r^n    | exponent   |
| f       |             |        |            |
|         | 12.2098920  | 2      | 3.8875120  |
|         | 16.1902910  | 2      | 3.8119630  |
| s-f     |             |        |            |
|         | 281.2854990 | 2      | 12.2963030 |
|         | 62.5202170  | 2      | 8.6326340  |
|         | -12.2098920 | 2      | 3.8875120  |
|         | -16.1902910 | 2      | 3.8119630  |
| p-f     |             |        |            |
|         | 72.2768970  | 2      | 10.2417900 |
|         | 144.5910830 | 2      | 8.9241760  |

|     |                   |                                |                              |
|-----|-------------------|--------------------------------|------------------------------|
|     | 4.7586930         | 2                              | 6.5813420                    |
|     | 9.9406210         | 2                              | 6.2554030                    |
|     | -12.2098920       | 2                              | 3.8875120                    |
|     | -16.1902910       | 2                              | 3.8119630                    |
| d-f |                   |                                |                              |
|     | 35.8485070        | 2                              | 7.7543360                    |
|     | 53.7243420        | 2                              | 7.7202810                    |
|     | 10.1152560        | 2                              | 4.9702640                    |
|     | 14.8337310        | 2                              | 4.5637890                    |
|     | -12.2098920       | 2                              | 3.8875120                    |
|     | -16.1902910       | 2                              | 3.8119630                    |
| *   |                   |                                |                              |
| *   |                   |                                |                              |
| bi  | def2-QZVPP        |                                |                              |
| #   | bi                | (17s14p10d4f1g) / [7s6p4d4f1g] | {9131111/731111/7111/1111/1} |
| *   |                   |                                |                              |
|     | 9                 | s                              |                              |
|     | 8131.0900000      |                                | 0.290000000000E-04           |
|     | 1225.7700000      |                                | 0.200000000000E-03           |
|     | 274.67200000      |                                | 0.684000000000E-03           |
|     | 37.616400000      |                                | 0.202180000000E-01           |
|     | 23.480400000      |                                | -0.15932600000               |
|     | 14.106500000      |                                | 0.61172600000                |
|     | 8.8130500000      |                                | -0.54465300000               |
|     | 5.5077800000      |                                | -0.63688400000               |
|     | 2.0397700000      |                                | 0.77169800000                |
|     | 1                 | s                              |                              |
|     | 1.0975227257      |                                | 1.0000000000                 |
|     | 3                 | s                              |                              |
|     | 13.614284474      |                                | 0.15800789319                |
|     | 11.010881766      |                                | -0.27164962692               |
|     | 2.2630089550      |                                | 0.52469330212                |
|     | 1                 | s                              |                              |
|     | 0.52344449532     |                                | 1.0000000000                 |
|     | 1                 | s                              |                              |
|     | 0.26734409206     |                                | 1.0000000000                 |
|     | 1                 | s                              |                              |
|     | 0.12836608814     |                                | 1.0000000000                 |
|     | 1                 | s                              |                              |
|     | 0.60097735551E-01 |                                | 1.0000000000                 |
|     | 7                 | p                              |                              |
|     | 99.591400000      |                                | 0.346000000000E-03           |
|     | 19.896400000      |                                | -0.199760000000E-01          |
|     | 12.437600000      |                                | 0.17544600000                |
|     | 7.7740000000      |                                | -0.37955600000               |
|     | 4.8399500000      |                                | -0.552620000000E-01          |
|     | 2.2547800000      |                                | 0.52888400000                |
|     | 1.1804900000      |                                | 0.52132400000                |
|     | 3                 | p                              |                              |
|     | 9.6213214965      |                                | -0.52920356623E-01           |
|     | 4.1321350830      |                                | 0.26705180214                |
|     | 1.2785827783      |                                | 0.72824686940                |
|     | 1                 | p                              |                              |
|     | 0.59423596262     |                                | 1.0000000000                 |
|     | 1                 | p                              |                              |
|     | 0.25794168858     |                                | 1.0000000000                 |
|     | 1                 | p                              |                              |
|     | 0.11273595358     |                                | 1.0000000000                 |
|     | 1                 | p                              |                              |
|     | 0.47791974731E-01 |                                | 1.0000000000                 |

```

7 d
69.632799181      0.35055800732E-03
14.888614968      0.81591735697E-02
6.5949628713     -0.83905319526E-01
4.1796107640      0.28034212952E-01
2.5697950152      0.20202314185
1.5601364822      0.33621249652
0.89210528768     0.34629017140
1 d
0.48093728228     1.00000000000
1 d
0.24233621968     1.00000000000
1 d
0.10440000000     1.00000000000
1 f
0.48030000000     1.00000000000
1 f
0.20060000000     1.00000000000
1 f
1.26256000000     1.00000000000
1 f
2.7210175470      1.00000000000
1 g
0.42030000000     1.00000000000
*
bi def2-ecp
*
ncore = 60          lmax = 3
# coefficient      r^n          exponent
f
      13.7133830    2            4.2145460
      18.1943080    2            4.1334000
s-f
      283.2642270   2            13.0430900
      62.4719590    2            8.2216820
      -13.7133830   2            4.2145460
      -18.1943080   2            4.1334000
p-f
      72.0014990    2            10.4677770
      144.0022770   2            9.1189010
      5.0079450     2            6.7547910
      9.9915500     2            6.2525920
      -13.7133830   2            4.2145460
      -18.1943080   2            4.1334000
d-f
      36.3962590    2            8.0814740
      54.5976640    2            7.8905950
      9.9842940     2            4.9555560
      14.9814850    2            4.7045590
      -13.7133830   2            4.2145460
      -18.1943080   2            4.1334000
*
*
po def2-QZVPP
# po (17s14p10d4f1g) / [7s6p4d4f1g] {9131111/731111/7111/1111/1}
*
9 s
8913.2900000      0.470000000000E-04
1338.9800000      0.331000000000E-03
299.538000000     0.116100000000E-02

```

|                   |                     |
|-------------------|---------------------|
| 51.148900000      | 0.789900000000E-02  |
| 23.015600000      | -0.14934700000      |
| 14.376500000      | 0.63824200000       |
| 8.9827900000      | -0.61708300000      |
| 5.6129200000      | -0.60519700000      |
| 2.1648400000      | 0.77608600000       |
| 1 s               |                     |
| 1.1753800000      | 1.00000000000       |
| 3 s               |                     |
| 14.787766907      | 0.15929033129       |
| 11.958781204      | -0.27310166985      |
| 2.4798455066      | 0.52423698726       |
| 1 s               |                     |
| 0.55481477792     | 1.00000000000       |
| 1 s               |                     |
| 0.28581735198     | 1.00000000000       |
| 1 s               |                     |
| 0.13849439468     | 1.00000000000       |
| 1 s               |                     |
| 0.64954523837E-01 | 1.00000000000       |
| 7 p               |                     |
| 113.55700000      | 0.387000000000E-03  |
| 20.363900000      | -0.182550000000E-01 |
| 12.727400000      | 0.17477600000       |
| 7.9498400000      | -0.39870300000      |
| 4.9647700000      | -0.318120000000E-01 |
| 2.3013000000      | 0.56604700000       |
| 1.1954500000      | 0.51022200000       |
| 3 p               |                     |
| 8.4681300000      | -0.23853762000      |
| 7.7962017000      | 0.28579119000       |
| 0.66871758000     | 0.46050656000       |
| 1 p               |                     |
| 0.59152423927     | 1.00000000000       |
| 1 p               |                     |
| 0.244444843795    | 1.00000000000       |
| 1 p               |                     |
| 0.11018922460     | 1.00000000000       |
| 1 p               |                     |
| 0.48149776000E-01 | 1.00000000000       |
| 7 d               |                     |
| 73.649818245      | 0.43310334586E-03   |
| 16.743441686      | 0.69436968591E-02   |
| 5.8163048812      | -0.83799240387      |
| 5.6493757173      | 0.79372183416       |
| 2.4547686106      | 0.29055549251       |
| 1.3909015593      | 0.38177920670       |
| 0.78934505572     | 0.29342954208       |
| 1 d               |                     |
| 0.44107648549     | 1.00000000000       |
| 1 d               |                     |
| 0.23631248810     | 1.00000000000       |
| 1 d               |                     |
| 0.10930000000     | 1.00000000000       |
| 1 f               |                     |
| 0.48940000000     | 1.00000000000       |
| 1 f               |                     |
| 0.20020000000     | 1.00000000000       |
| 1 f               |                     |
| 1.31220000000     | 1.00000000000       |

```

1 f
2.8220658714      1.0000000000
1 g
0.40740000000    1.0000000000
*
po def2-ecp
*
ncore =      60      lmax =      3
#      coefficient  r^n      exponent
f
      17.4282950    2        5.0132700
      23.3803530    2        4.9846400
      0.1633920    2        1.3267600
      0.3245660    2        1.5287580
s-f
      283.2447060   2        13.2772270
      62.3964610   2        8.3995180
      -17.4282950  2        5.0132700
      -23.3803530  2        4.9846400
      -0.1633920  2        1.3267600
      -0.3245660  2        1.5287580
p-f
      71.9917160    2        10.6656820
      143.9718710   2        9.2837530
      4.9496150     2        6.8727490
      9.7404990     2        6.3261500
      -17.4282950  2        5.0132700
      -23.3803530  2        4.9846400
      -0.1633920  2        1.3267600
      -0.3245660  2        1.5287580
d-f
      36.3783830    2        8.2148660
      54.5627150    2        8.0086960
      9.8894990     2        5.0552270
      14.6938770    2        4.7825530
      -17.4282950  2        5.0132700
      -23.3803530  2        4.9846400
      -0.1633920  2        1.3267600
      -0.3245660  2        1.5287580
*
*
at def2-QZVPP
# at      (17s14p10d4f1g) / [7s6p4d4f1g]      {9131111/731111/7111/1111/1}
*
9 s
9090.2800000      0.350000000000E-04
1373.0700000      0.242000000000E-03
307.950000000     0.815000000000E-03
48.017600000      0.846500000000E-02
23.909900000      -0.14733300000
14.933400000      0.63241500000
9.3317100000      -0.61640600000
5.8320600000      -0.61925800000
2.2878700000      0.78512400000
1 s
1.2537238008      1.00000000000
3 s
14.805780876      0.15771473639
11.855783628      -0.28007490839
2.5818782360      0.52359428906

```

```

1 s
0.61460691976      1.0000000000
1 s
0.31486716636      1.0000000000
1 s
0.15441669153      1.0000000000
1 s
0.72866424566E-01  1.0000000000
7 p
124.60200000      0.468000000000E-03
20.889900000      -0.16124000000E-01
13.058500000      0.17119600000
8.1606100000      -0.40887500000
5.0980800000      -0.16407000000E-01
2.3787600000      0.58817200000
1.2375500000      0.50099700000
3 p
8.7977584321      -0.23832810213
8.0996431502      0.28585830834
0.67629719775      0.46050935965
1 p
0.60785017930      1.0000000000
1 p
0.26116561417      1.0000000000
1 p
0.11948611257      1.0000000000
1 p
0.52899086095E-01  1.0000000000
7 d
76.152584155      0.54645145370E-03
17.982092186      0.70498116717E-02
5.8900316564      -0.59711331046
5.6001503121      0.56517203927
2.4782622062      0.32344318344
1.3928750256      0.39511263456
0.78560551382      0.27094838862
1 d
0.44173978741      1.0000000000
1 d
0.24984733563      1.0000000000
1 d
0.12700000000      1.0000000000
1 f
0.53890000000      1.0000000000
1 f
0.22870000000      1.0000000000
1 f
1.4237200000      1.0000000000
1 f
3.0086421207      1.0000000000
1 g
0.43630000000      1.0000000000
*
at def2-ecp
*
ncore =      60      lmax =      3
#      coefficient      r^n      exponent
f
      19.8701980      2      5.8121630
      26.4164520      2      5.7537150

```

|     |             |   |            |
|-----|-------------|---|------------|
|     | 0.9949700   | 2 | 2.5134720  |
|     | 1.4907010   | 2 | 2.5362610  |
| s-f |             |   |            |
|     | 49.9571580  | 2 | 30.2008320 |
|     | 283.2103710 | 2 | 13.6123060 |
|     | 62.2810520  | 2 | 8.5293400  |
|     | -19.8701980 | 2 | 5.8121630  |
|     | -26.4164520 | 2 | 5.7537150  |
|     | -0.9949700  | 2 | 2.5134720  |
|     | -1.4907010  | 2 | 2.5362610  |
| p-f |             |   |            |
|     | 71.9823710  | 2 | 10.8540650 |
|     | 143.9035320 | 2 | 9.4682290  |
|     | 4.8717590   | 2 | 7.0311140  |
|     | 8.9830590   | 2 | 6.1438580  |
|     | -19.8701980 | 2 | 5.8121630  |
|     | -26.4164520 | 2 | 5.7537150  |
|     | -0.9949700  | 2 | 2.5134720  |
|     | -1.4907010  | 2 | 2.5362610  |
| d-f |             |   |            |
|     | 36.3632370  | 2 | 8.3135150  |
|     | 54.5489700  | 2 | 7.9989650  |
|     | 9.7762850   | 2 | 5.1799660  |
|     | 14.2647550  | 2 | 4.9422260  |
|     | -19.8701980 | 2 | 5.8121630  |
|     | -26.4164520 | 2 | 5.7537150  |
|     | -0.9949700  | 2 | 2.5134720  |
|     | -1.4907010  | 2 | 2.5362610  |

\*  
\*

rn def2-QZVPP

# rn (17s14p11d4f1g) / [7s6p4d4f1g] {9131111/731111/8111/1111/1}

\*

|                   |   |                    |  |
|-------------------|---|--------------------|--|
| 9                 | s |                    |  |
| 12715.600000      |   | 0.470000000000E-04 |  |
| 1913.300000       |   | 0.338000000000E-03 |  |
| 429.95600000      |   | 0.128000000000E-02 |  |
| 100.97800000      |   | 0.278200000000E-02 |  |
| 24.470800000      |   | -0.10042100000     |  |
| 15.292200000      |   | 0.53982400000      |  |
| 9.5548300000      |   | -0.57385600000     |  |
| 5.9666100000      |   | -0.61000000000     |  |
| 2.3893900000      |   | 0.79325300000      |  |
| 1                 | s |                    |  |
| 1.3276477516      |   | 1.0000000000       |  |
| 3                 | s |                    |  |
| 17.195195341      |   | 0.16333005101      |  |
| 14.230303720      |   | -0.27167744770     |  |
| 3.0760339153      |   | 0.52372666490      |  |
| 1                 | s |                    |  |
| 0.69973866760     |   | 1.0000000000       |  |
| 1                 | s |                    |  |
| 0.33174234887     |   | 1.0000000000       |  |
| 1                 | s |                    |  |
| 0.16093431878     |   | 1.0000000000       |  |
| 1                 | s |                    |  |
| 0.75883596172E-01 |   | 1.0000000000       |  |
| 7                 | p |                    |  |
| 131.70800000      |   | 0.58500000000E-03  |  |
| 21.401600000      |   | -0.14438000000E-01 |  |



|                   |                    |
|-------------------|--------------------|
| 13.382600000      | 0.17009500000      |
| 8.368800000       | -0.42250400000     |
| 5.229450000       | -0.17190000000E-02 |
| 2.476850000       | 0.60115800000      |
| 1.301800000       | 0.49278000000      |
| 3 p               |                    |
| 9.0768547920      | -0.23950411879     |
| 8.3822367043      | 0.28554010268      |
| 0.70618692299     | 0.46017587936      |
| 1 p               |                    |
| 0.64553860374     | 1.00000000000      |
| 1 p               |                    |
| 0.28380500916     | 1.00000000000      |
| 1 p               |                    |
| 0.13160518578     | 1.00000000000      |
| 1 p               |                    |
| 0.58958259826E-01 | 1.00000000000      |
| 8 d               |                    |
| 183.73000000      | 0.12900000000E-03  |
| 54.689700000      | 0.94900000000E-03  |
| 16.425500000      | 0.10100000000E-01  |
| 7.3050000000      | -0.87309000000E-01 |
| 4.2747700000      | 0.71452000000E-01  |
| 2.6114200000      | 0.29537800000      |
| 1.5667400000      | 0.35873100000      |
| 0.96097900000     | 0.25612000000      |
| 1 d               |                    |
| 0.59653500000     | 1.00000000000      |
| 1 d               |                    |
| 0.34202800000     | 1.00000000000      |
| 1 d               |                    |
| 0.15160000000     | 1.00000000000      |
| 1 f               |                    |
| 0.59400000000     | 1.00000000000      |
| 1 f               |                    |
| 0.26840000000     | 1.00000000000      |
| 1 f               |                    |
| 1.5556400000      | 1.00000000000      |
| 1 f               |                    |
| 3.2498641894      | 1.00000000000      |
| 1 g               |                    |
| 0.47630000000     | 1.00000000000      |

\*

rn def2-ecp

\*

| #   | ncore = 60  | lmax = 3 | exponent   |
|-----|-------------|----------|------------|
| f   | coefficient | r^n      |            |
|     | 21.7972900  | 2        | 6.3485710  |
|     | 28.9468050  | 2        | 6.2959490  |
|     | 1.4473650   | 2        | 2.8821180  |
|     | 2.1779640   | 2        | 2.9080480  |
| s-f |             |          |            |
|     | 49.9655510  | 2        | 30.1512420 |
|     | 283.0700000 | 2        | 14.5212410 |
|     | 62.0028700  | 2        | 8.0520380  |
|     | -21.7972900 | 2        | 6.3485710  |
|     | -28.9468050 | 2        | 6.2959490  |
|     | -1.4473650  | 2        | 2.8821180  |
|     | -2.1779640  | 2        | 2.9080480  |

p-f

|             |   |            |
|-------------|---|------------|
| 71.9691190  | 2 | 11.0099420 |
| 143.8605590 | 2 | 9.6176250  |
| 4.7147610   | 2 | 7.3360080  |
| 9.0130650   | 2 | 6.4062530  |
| -21.7972900 | 2 | 6.3485710  |
| -28.9468050 | 2 | 6.2959490  |
| -1.4473650  | 2 | 2.8821180  |
| -2.1779640  | 2 | 2.9080480  |

d-f

|             |   |           |
|-------------|---|-----------|
| 36.3683650  | 2 | 8.3692200 |
| 54.5517610  | 2 | 8.1169750 |
| 9.6344870   | 2 | 5.3536560 |
| 14.3879020  | 2 | 5.0972120 |
| -21.7972900 | 2 | 6.3485710 |
| -28.9468050 | 2 | 6.2959490 |
| -1.4473650  | 2 | 2.8821180 |
| -2.1779640  | 2 | 2.9080480 |

\*

\$end
