# Supplementary material for: Balanced basis sets of split valence, triple zeta valence and quadruple zeta valence quality for H to Rn: Design and assessment of accuracy
Source: Royal Society of Chemistry journal article supplement (doi:10.1039/b508541a), 2005-01-01
Supplement: b508541a_results.pdf [file b508541a_results.pdf]

```

!
!=====
!ATOMIZATION ENERGIES AND NON-ZERO DIPOLE MOMENTS FOR THE MOLECULAR TEST SET
!AT LEVELS DFT(BP86), MP2 AND HF USING DEF2- AND DEF-BASIS SETS.
!=====
!
!column "QZVPP": result obtained with def2-QZVPP bases
!other columns: differences to def2-QZVPP
!
!
!
!=====
!   atomization energies per atom /eV: DFT(BP86)
!=====
!
!
!
!compound      QZVPP      def2-      def-
!              QZVPP      TZVPP      TZVPP      SVP      SV(P)  TZVPP      TZVPP      SVP      SV(P)
!              -QZVPP      -QZVPP      -QZVPP      -QZVPP      -QZVPP  -QZVPP      -QZVPP      -QZVPP      -QZVPP
!
BaF            3.09      -0.02      -0.06      -0.06      -0.12      -0.12      -0.18      -0.20      -0.12      -0.12
BaF2           4.09      -0.03      -0.07      -0.07      -0.16      -0.16      -0.20      -0.22      -0.16      -0.16
BaH2           1.61      -0.01      -0.02      -0.04      -0.07      -0.08      -0.06      -0.07      -0.07      -0.08
BaO            2.97      -0.02      -0.09      -0.09      -0.24      -0.24      -0.26      -0.30      -0.24      -0.24
BaS            2.30      -0.01      -0.04      -0.04      -0.07      -0.07      -0.10      -0.11      -0.07      -0.07
Be2F4          4.75      0.00      -0.09      -0.09      -0.02      -0.02      -0.15      -0.21      -0.02      -0.02
Be2H4          2.48      0.00      -0.02      -0.03      -0.03      -0.03      -0.04      -0.06      -0.03      -0.07
Be4            1.22      0.00      -0.03      -0.03      -0.01      -0.01      -0.06      -0.08      -0.01      -0.01
BeC2H6         3.77      0.00      -0.01      -0.02      0.00      -0.05      -0.01      -0.02      0.00      -0.05
BeF2O2H4       3.96      0.00      -0.03      -0.04      -0.02      -0.12      -0.05      -0.09      -0.02      -0.12
BeH2           2.23      0.00      -0.02      -0.03      -0.01      -0.05      -0.02      -0.04      -0.01      -0.05
BeS            1.83      0.00      -0.04      -0.04      -0.03      -0.03      -0.07      -0.11      -0.03      -0.03
CaCl2          3.10      0.00      -0.05      -0.05      -0.01      -0.01      -0.05      -0.08      -0.01      -0.01
CaF2           4.01      0.00      -0.08      -0.08      -0.09      -0.09      -0.08      -0.09      -0.09      -0.09
CaH2           1.57      0.00      -0.02      -0.03      -0.05      -0.06      -0.02      -0.04      -0.05      -0.06
CsF            2.62      -0.02      -0.04      -0.05      -0.21      -0.21      -0.22      -0.43      -0.85      -0.85
CsH            0.95      0.00      -0.01      -0.02      -0.06      -0.06      -0.07      -0.17      -0.19      -0.20
CsO            1.47      -0.01      -0.04      -0.05      -0.17      -0.17      -0.25      -0.38      -0.69      -0.69
K2S            1.61      0.00      -0.03      -0.03      -0.07      -0.07      -0.14      -0.23      -0.27      -0.27
K3P            1.00      0.00      -0.02      -0.02      -0.03      -0.03      -0.09      -0.15      -0.15      -0.15
KBr            1.96      0.00      -0.02      -0.02      -0.09      -0.09      -0.09      -0.15      -0.23      -0.23
KCl            2.14      0.00      -0.04      -0.04      -0.13      -0.13      -0.13      -0.20      -0.34      -0.34
KF             2.58      0.00      -0.06      -0.06      -0.26      -0.26      -0.22      -0.33      -0.67      -0.67
KH             0.96      0.00      -0.02      -0.02      -0.05      -0.05      -0.05      -0.11      -0.12      -0.12
KI             1.70      0.00      -0.02      -0.02      -0.05      -0.05      -0.07      -0.11      -0.13      -0.13
Li2            0.44      0.00      -0.01      -0.01      0.01      0.01      -0.01      -0.01      0.00      0.00
Li2O           2.54      0.00      -0.03      -0.04      0.01      0.01      -0.04      -0.16      -0.13      -0.13
Li4C4H12       3.42      0.00      0.00      -0.01      0.01      -0.03      -0.01      -0.02      0.00      -0.04
Li4Cl4         3.10      0.00      -0.01      -0.02      0.11      0.11      -0.03      -0.06      0.07      0.07
Li4H4          2.02      0.00      -0.01      -0.03      0.01      0.00      -0.02      -0.04      -0.03      -0.04
Li8            0.80      0.00      -0.02      -0.02      0.01      0.01      -0.02      -0.03      -0.02      -0.02
LiBH4          2.98      0.00      -0.01      -0.02      0.00      -0.03      -0.01      -0.03      -0.01      -0.04
LiCl           2.38      0.00      -0.02      -0.04      -0.04      -0.04      -0.04      -0.09      -0.10      -0.10
LiF            2.99      0.00      -0.03      -0.06      -0.09      -0.09      -0.06      -0.15      -0.20      -0.20
LiH            1.26      0.00      -0.01      -0.02      0.00      -0.01      -0.01      -0.03      -0.02      -0.03
LiSLi          2.11      0.00      -0.02      -0.03      -0.03      -0.03      -0.03      -0.10      -0.14      -0.14
Mg4            0.29      0.00      0.00      0.00      0.02      0.02      -0.05      -0.15      -0.15      -0.15
MgCl2          2.65      0.00      -0.01      -0.01      0.02      0.02      -0.12      -0.23      -0.27      -0.27
MgF            2.36      0.00      -0.04      -0.04      0.00      0.00      -0.15      -0.30      -0.46      -0.46
MgF2           3.58      0.00      -0.05      -0.05      0.01      0.01      -0.20      -0.30      -0.45      -0.45
MgH2           1.55      0.00      0.00      -0.01      0.00      -0.02      -0.02      -0.05      -0.05      -0.08
Na2O           1.72      -0.01      -0.01      -0.01      0.02      0.02      -0.07      -0.08      -0.11      -0.11
Na2S           1.59      -0.01      0.00      0.00      0.01      0.01      -0.05      -0.07      -0.05      -0.05
Na3N           1.04      -0.01      0.00      0.00      0.01      0.01      -0.04      -0.06      -0.04      -0.04
Na3P           1.11      0.00      0.01      0.01      0.02      0.02      -0.02      -0.04      -0.01      -0.01
NaCl           2.04      0.00      -0.01      -0.01      -0.03      -0.03      -0.06      -0.08      -0.11      -0.11
NaF            2.47      -0.01      -0.03      -0.03      -0.11      -0.11      -0.11      -0.12      -0.29      -0.29
NaH            1.01      0.00      0.00      -0.01      -0.01      -0.02      -0.01      -0.03      -0.02      -0.03
PLi3           1.55      0.00      -0.02      -0.02      0.00      0.00      -0.03      -0.08      -0.06      -0.06
RbF            2.48      -0.01      -0.04      -0.05      -0.21      -0.21      -0.20      -0.29      -0.65      -0.65
RbH            0.90      0.00      -0.01      -0.01      -0.02      -0.03      -0.04      -0.10      -0.11      -0.11
RbO            1.34      -0.01      -0.03      -0.04      -0.17      -0.17      -0.20      -0.26      -0.53      -0.53
SrF            2.88      -0.02      -0.04      -0.06      -0.03      -0.03      -0.12      -0.13      -0.03      -0.03
SrF2           3.91      -0.03      -0.05      -0.08      -0.05      -0.05      -0.14      -0.14      -0.05      -0.05
SrH2           1.48      0.00      -0.01      -0.02      -0.04      -0.05      -0.03      -0.03      -0.04      -0.05

```

|        |      |       |       |       |       |       |       |       |       |       |
|--------|------|-------|-------|-------|-------|-------|-------|-------|-------|-------|
| SrO    | 2.44 | -0.01 | -0.04 | -0.07 | -0.10 | -0.10 | -0.14 | -0.16 | -0.10 | -0.10 |
| SrS    | 1.90 | -0.01 | -0.01 | -0.02 | 0.00  | 0.00  | -0.05 | -0.05 | 0.00  | 0.00  |
| B2H6   | 3.36 | 0.00  | 0.00  | 0.00  | 0.00  | -0.04 | 0.00  | -0.01 | 0.00  | -0.04 |
| B3N3H6 | 4.53 | 0.00  | 0.00  | -0.01 | 0.04  | -0.01 | 0.00  | -0.03 | 0.04  | -0.01 |
| B4H4   | 3.80 | 0.00  | 0.00  | 0.00  | 0.03  | 0.01  | 0.00  | -0.01 | 0.03  | 0.01  |
| BF3    | 5.15 | 0.00  | 0.00  | 0.00  | 0.13  | 0.13  | 0.00  | -0.05 | 0.13  | 0.13  |
| BH3    | 3.10 | 0.00  | 0.00  | 0.00  | -0.01 | -0.04 | 0.00  | -0.01 | -0.01 | -0.04 |
| BH3CO  | 4.25 | 0.00  | 0.00  | 0.00  | 0.03  | 0.01  | 0.00  | -0.03 | 0.03  | 0.01  |
| BH3NH3 | 3.40 | 0.00  | 0.00  | -0.01 | -0.01 | -0.07 | 0.00  | -0.02 | -0.01 | -0.07 |
| C2H2   | 4.49 | 0.00  | 0.00  | -0.01 | 0.00  | -0.04 | 0.00  | -0.02 | 0.00  | -0.04 |
| C2H3N  | 4.03 | 0.00  | 0.00  | -0.01 | 0.01  | -0.04 | 0.00  | -0.04 | 0.01  | -0.04 |
| C2H4   | 4.16 | 0.00  | 0.00  | -0.01 | 0.01  | -0.03 | 0.00  | -0.01 | 0.01  | -0.03 |
| C2H6   | 3.94 | 0.00  | 0.00  | -0.01 | 0.01  | -0.04 | 0.00  | -0.01 | 0.01  | -0.04 |
| C4H4   | 4.45 | 0.00  | 0.00  | 0.00  | 0.07  | 0.04  | 0.00  | -0.03 | 0.07  | 0.04  |
| C6H6   | 5.06 | 0.00  | 0.00  | 0.00  | 0.05  | 0.02  | 0.00  | -0.02 | 0.05  | 0.02  |
| CF4    | 4.28 | 0.00  | 0.01  | 0.01  | 0.17  | 0.17  | 0.01  | -0.07 | 0.17  | 0.17  |
| CH2O   | 4.19 | 0.00  | 0.00  | -0.01 | 0.03  | 0.00  | 0.00  | -0.03 | 0.03  | 0.00  |
| CH2O2  | 3.74 | 0.00  | 0.00  | 0.00  | 0.02  | 0.00  | 0.00  | -0.05 | 0.02  | 0.00  |
| CH3N   | 3.94 | 0.00  | 0.00  | -0.01 | 0.00  | -0.05 | 0.00  | -0.03 | 0.00  | -0.05 |
| CH3OH  | 3.80 | 0.00  | 0.00  | -0.02 | -0.01 | -0.08 | 0.00  | -0.03 | -0.01 | -0.08 |
| CH4    | 3.72 | 0.00  | 0.00  | -0.01 | -0.01 | -0.06 | 0.00  | -0.01 | -0.01 | -0.06 |
| CO     | 5.73 | 0.00  | 0.00  | 0.00  | 0.06  | 0.06  | 0.00  | -0.05 | 0.06  | 0.06  |
| CO2    | 5.90 | 0.00  | 0.00  | 0.00  | 0.10  | 0.10  | 0.00  | -0.07 | 0.10  | 0.10  |
| F2     | 1.10 | 0.00  | 0.01  | 0.01  | 0.06  | 0.06  | 0.01  | -0.03 | 0.06  | 0.06  |
| H2     | 2.42 | 0.00  | 0.00  | 0.00  | -0.05 | -0.08 | 0.00  | 0.00  | -0.05 | -0.08 |
| H2CO3  | 4.64 | 0.00  | 0.00  | -0.01 | 0.06  | -0.03 | 0.00  | -0.06 | 0.06  | -0.03 |
| H2O    | 3.44 | 0.00  | -0.01 | -0.04 | -0.11 | -0.28 | -0.01 | -0.06 | -0.11 | -0.28 |
| H2O2   | 3.08 | 0.00  | 0.00  | -0.03 | -0.04 | -0.16 | 0.00  | -0.05 | -0.04 | -0.16 |
| HCN    | 4.67 | 0.00  | 0.00  | -0.01 | 0.00  | -0.02 | 0.00  | -0.03 | 0.00  | -0.02 |
| HF     | 3.12 | 0.00  | -0.01 | -0.04 | -0.13 | -0.31 | -0.01 | -0.05 | -0.13 | -0.31 |
| HNC    | 4.46 | 0.00  | 0.00  | -0.01 | 0.01  | -0.04 | 0.00  | -0.04 | 0.01  | -0.04 |
| HNO    | 3.19 | 0.00  | 0.00  | -0.01 | 0.01  | -0.02 | 0.00  | -0.06 | 0.01  | -0.02 |
| HNO2   | 3.64 | 0.00  | 0.00  | -0.01 | 0.04  | 0.02  | 0.00  | -0.07 | 0.04  | 0.02  |
| HNO3   | 3.72 | 0.00  | 0.00  | -0.01 | 0.06  | 0.01  | 0.00  | -0.09 | 0.06  | 0.01  |
| N2     | 5.15 | 0.00  | 0.00  | 0.00  | -0.01 | -0.01 | 0.00  | -0.07 | -0.01 | -0.01 |
| N2H2   | 3.35 | 0.00  | -0.01 | -0.02 | -0.03 | -0.09 | -0.01 | -0.07 | -0.03 | -0.09 |
| N2H4   | 3.31 | 0.00  | -0.01 | -0.02 | -0.05 | -0.13 | -0.01 | -0.05 | -0.05 | -0.13 |
| N4     | 3.43 | 0.00  | -0.01 | -0.01 | -0.01 | -0.01 | -0.01 | -0.12 | -0.01 | -0.01 |
| NF3    | 2.57 | 0.00  | 0.00  | 0.00  | 0.05  | 0.05  | 0.00  | -0.08 | 0.05  | 0.05  |
| NH3    | 3.34 | 0.00  | -0.01 | -0.03 | -0.07 | -0.18 | -0.01 | -0.04 | -0.07 | -0.18 |
| NH4F   | 3.36 | 0.00  | -0.01 | -0.03 | -0.08 | -0.20 | -0.01 | -0.03 | -0.08 | -0.20 |
| OF2    | 1.72 | 0.00  | 0.00  | 0.00  | 0.04  | 0.04  | 0.00  | -0.06 | 0.04  | 0.04  |
| Al2O3  | 4.07 | 0.00  | -0.01 | -0.01 | -0.07 | -0.07 | -0.06 | -0.14 | -0.07 | -0.07 |
| Al2S3  | 3.07 | 0.00  | 0.01  | 0.01  | 0.00  | 0.00  | -0.02 | -0.08 | 0.00  | 0.00  |
| AlCl3  | 3.26 | 0.00  | 0.01  | 0.00  | 0.01  | 0.01  | -0.03 | -0.09 | 0.01  | 0.01  |
| AlF3   | 4.59 | 0.00  | -0.02 | -0.02 | -0.06 | -0.06 | -0.07 | -0.18 | -0.06 | -0.06 |
| AlH3   | 2.31 | 0.00  | 0.00  | 0.00  | -0.01 | -0.03 | -0.01 | -0.02 | -0.01 | -0.03 |
| AlN    | 1.51 | 0.00  | -0.01 | -0.01 | -0.07 | -0.07 | -0.03 | -0.09 | -0.07 | -0.07 |
| CS2    | 4.24 | 0.00  | 0.01  | 0.01  | 0.01  | 0.01  | -0.03 | -0.11 | 0.01  | 0.01  |
| Cl2    | 1.36 | 0.00  | 0.00  | 0.00  | -0.10 | -0.10 | -0.03 | -0.14 | -0.10 | -0.10 |
| ClF    | 1.52 | 0.00  | -0.01 | -0.01 | -0.09 | -0.09 | -0.03 | -0.13 | -0.09 | -0.09 |
| ClF3   | 1.73 | 0.00  | -0.02 | -0.02 | -0.21 | -0.21 | -0.07 | -0.23 | -0.21 | -0.21 |
| H2SO4  | 3.81 | 0.00  | -0.01 | -0.02 | -0.23 | -0.31 | -0.10 | -0.31 | -0.23 | -0.31 |
| H3PO4  | 4.20 | 0.00  | -0.01 | -0.02 | -0.15 | -0.25 | -0.06 | -0.21 | -0.15 | -0.25 |
| HCP    | 3.73 | 0.00  | 0.00  | 0.00  | -0.02 | -0.04 | -0.02 | -0.07 | -0.02 | -0.04 |
| HCl    | 2.35 | 0.00  | 0.00  | -0.02 | -0.06 | -0.17 | -0.01 | -0.05 | -0.06 | -0.17 |
| HSH    | 2.70 | 0.00  | 0.00  | -0.01 | -0.05 | -0.14 | -0.02 | -0.05 | -0.05 | -0.14 |
| HSSH   | 2.69 | 0.00  | 0.00  | -0.01 | -0.08 | -0.14 | -0.03 | -0.09 | -0.08 | -0.14 |
| P2     | 2.59 | 0.00  | 0.00  | 0.00  | -0.07 | -0.07 | -0.04 | -0.12 | -0.07 | -0.07 |
| PF3    | 4.02 | 0.00  | -0.01 | -0.02 | -0.14 | -0.14 | -0.07 | -0.26 | -0.14 | -0.14 |
| PF5    | 4.04 | 0.00  | -0.01 | -0.01 | -0.12 | -0.12 | -0.08 | -0.30 | -0.12 | -0.12 |
| PH3    | 2.68 | 0.00  | 0.00  | 0.00  | -0.03 | -0.09 | -0.01 | -0.04 | -0.03 | -0.09 |
| S2     | 2.43 | 0.00  | 0.00  | 0.00  | -0.09 | -0.09 | -0.05 | -0.16 | -0.09 | -0.09 |
| S5     | 2.76 | 0.00  | 0.00  | 0.00  | -0.15 | -0.15 | -0.05 | -0.22 | -0.15 | -0.15 |
| SF2    | 2.72 | 0.00  | -0.02 | -0.02 | -0.14 | -0.14 | -0.06 | -0.22 | -0.14 | -0.14 |
| SF4    | 3.07 | 0.00  | -0.02 | -0.02 | -0.18 | -0.18 | -0.09 | -0.29 | -0.18 | -0.18 |
| SF6    | 3.08 | 0.00  | -0.01 | -0.01 | -0.14 | -0.14 | -0.10 | -0.35 | -0.14 | -0.14 |
| SiCl4  | 3.27 | 0.00  | 0.01  | 0.01  | -0.04 | -0.04 | -0.04 | -0.14 | -0.04 | -0.04 |
| SiF4   | 4.91 | 0.00  | -0.01 | -0.02 | -0.11 | -0.11 | -0.08 | -0.27 | -0.11 | -0.11 |
| SiH4   | 2.82 | 0.00  | 0.00  | 0.00  | -0.02 | -0.05 | -0.01 | -0.03 | -0.02 | -0.05 |
| SiO2   | 4.42 | 0.00  | -0.01 | -0.01 | -0.16 | -0.16 | -0.07 | -0.21 | -0.16 | -0.16 |
| SiS2   | 3.32 | 0.00  | 0.01  | 0.01  | -0.05 | -0.05 | -0.04 | -0.13 | -0.05 | -0.05 |
| As4    | 2.73 | 0.00  | 0.01  | 0.01  | -0.03 | -0.03 | 0.01  | -0.07 | -0.03 | -0.03 |
| As4S4  | 2.71 | 0.00  | 0.01  | 0.01  | -0.04 | -0.04 | -0.01 | -0.11 | -0.04 | -0.04 |
| AsCl3  | 2.49 | 0.00  | 0.00  | 0.00  | -0.04 | -0.04 | -0.01 | -0.10 | -0.04 | -0.04 |

|        |      |      |       |       |       |       |       |       |       |       |
|--------|------|------|-------|-------|-------|-------|-------|-------|-------|-------|
| AsCl6- | 2.64 | 0.00 | 0.00  | 0.00  | -0.06 | -0.06 | -0.01 | -0.08 | -0.06 | -0.06 |
| AsH3   | 2.46 | 0.00 | 0.00  | 0.00  | -0.01 | -0.05 | 0.00  | -0.01 | -0.01 | -0.05 |
| Br2    | 1.21 | 0.00 | -0.01 | -0.01 | -0.04 | -0.04 | -0.01 | -0.07 | -0.04 | -0.04 |
| BrCl   | 1.29 | 0.00 | -0.01 | -0.01 | -0.07 | -0.07 | -0.02 | -0.10 | -0.07 | -0.07 |
| BrO4-  | 3.01 | 0.00 | -0.03 | -0.03 | -0.29 | -0.29 | -0.03 | -0.24 | -0.29 | -0.29 |
| GaCl   | 2.43 | 0.00 | 0.01  | 0.01  | 0.02  | 0.02  | 0.01  | -0.02 | 0.02  | 0.02  |
| GaCl3  | 2.76 | 0.00 | 0.01  | 0.01  | 0.03  | 0.03  | 0.00  | -0.05 | 0.03  | 0.03  |
| GaF    | 3.12 | 0.00 | -0.01 | -0.01 | 0.00  | 0.00  | -0.01 | -0.05 | 0.00  | 0.00  |
| GaF2   | 3.16 | 0.00 | -0.01 | -0.01 | 0.01  | 0.01  | -0.01 | -0.08 | 0.01  | 0.01  |
| GaH3   | 2.15 | 0.00 | 0.00  | -0.01 | -0.02 | -0.04 | 0.00  | -0.01 | -0.02 | -0.04 |
| GaO    | 2.36 | 0.00 | -0.01 | -0.01 | -0.03 | -0.03 | -0.01 | -0.07 | -0.03 | -0.03 |
| GeCl4  | 2.83 | 0.00 | 0.02  | 0.02  | 0.01  | 0.01  | 0.00  | -0.07 | 0.01  | 0.01  |
| GeF3   | 3.67 | 0.00 | -0.01 | -0.01 | -0.01 | -0.01 | -0.01 | -0.12 | -0.01 | -0.01 |
| GeF4   | 4.01 | 0.00 | -0.01 | -0.01 | 0.00  | 0.00  | -0.01 | -0.14 | 0.00  | 0.00  |
| GeH4   | 2.59 | 0.00 | 0.00  | 0.00  | -0.01 | -0.04 | 0.00  | -0.01 | -0.01 | -0.04 |
| GeO    | 3.62 | 0.00 | -0.01 | -0.01 | -0.03 | -0.03 | -0.01 | -0.08 | -0.03 | -0.03 |
| GeO2   | 3.59 | 0.00 | -0.01 | -0.01 | -0.07 | -0.07 | -0.01 | -0.12 | -0.07 | -0.07 |
| HBr    | 2.07 | 0.00 | 0.00  | -0.01 | -0.02 | -0.10 | 0.00  | -0.02 | -0.02 | -0.10 |
| HCBBr3 | 2.74 | 0.00 | 0.00  | 0.00  | 0.01  | 0.00  | 0.00  | -0.04 | 0.01  | 0.00  |
| Se8    | 2.52 | 0.00 | -0.01 | -0.01 | -0.02 | -0.02 | -0.01 | -0.07 | -0.02 | -0.02 |
| SeH2   | 2.43 | 0.00 | 0.00  | -0.01 | -0.01 | -0.08 | 0.00  | -0.02 | -0.01 | -0.08 |
| SeO    | 2.59 | 0.00 | -0.01 | -0.01 | -0.07 | -0.07 | -0.01 | -0.11 | -0.07 | -0.07 |
| SeO2   | 3.29 | 0.00 | -0.02 | -0.02 | -0.11 | -0.11 | -0.02 | -0.16 | -0.11 | -0.11 |
| I2     | 1.06 | 0.00 | -0.01 | -0.01 | -0.07 | -0.07 | -0.05 | -0.11 | -0.11 | -0.11 |
| ICl    | 1.26 | 0.00 | -0.01 | -0.01 | -0.09 | -0.09 | -0.06 | -0.14 | -0.13 | -0.13 |
| IH     | 1.77 | 0.00 | 0.00  | -0.01 | -0.03 | -0.08 | -0.01 | -0.02 | -0.04 | -0.10 |
| IO4-   | 3.24 | 0.00 | -0.06 | -0.06 | -0.47 | -0.47 | -0.22 | -0.52 | -0.59 | -0.59 |
| InCl   | 2.30 | 0.00 | 0.00  | 0.00  | -0.02 | -0.02 | 0.08  | 0.03  | 0.04  | 0.04  |
| InCl3  | 2.49 | 0.00 | 0.00  | 0.00  | -0.01 | -0.01 | 0.27  | 0.16  | 0.19  | 0.19  |
| InH    | 1.39 | 0.00 | 0.00  | 0.00  | -0.02 | -0.03 | 0.03  | 0.02  | 0.00  | -0.01 |
| InH3   | 1.90 | 0.00 | 0.00  | -0.01 | -0.03 | -0.05 | 0.10  | 0.07  | 0.06  | 0.04  |
| InO    | 1.98 | 0.00 | -0.02 | -0.02 | -0.13 | -0.13 | 0.24  | 0.13  | 0.10  | 0.10  |
| SbCl6- | 2.81 | 0.00 | -0.01 | -0.01 | -0.07 | -0.07 | 0.01  | -0.08 | -0.05 | -0.05 |
| SbF    | 2.25 | 0.00 | -0.03 | -0.03 | -0.15 | -0.15 | -0.02 | -0.13 | -0.14 | -0.14 |
| SbF3   | 3.62 | 0.00 | -0.04 | -0.04 | -0.17 | -0.17 | -0.02 | -0.22 | -0.18 | -0.18 |
| SbH3   | 2.20 | 0.00 | 0.00  | -0.01 | -0.03 | -0.06 | 0.04  | 0.03  | -0.01 | -0.04 |
| SbO2   | 2.88 | 0.00 | -0.03 | -0.03 | -0.21 | -0.21 | -0.02 | -0.19 | -0.23 | -0.23 |
| SnF3   | 3.41 | 0.00 | -0.02 | -0.02 | -0.11 | -0.11 | 0.00  | -0.16 | -0.12 | -0.12 |
| SnH4   | 2.28 | 0.00 | 0.00  | -0.01 | -0.03 | -0.05 | 0.03  | 0.02  | -0.03 | -0.06 |
| SnO    | 3.04 | 0.00 | -0.02 | -0.02 | -0.13 | -0.13 | -0.06 | -0.16 | -0.22 | -0.22 |
| SnO2   | 3.00 | 0.00 | -0.02 | -0.02 | -0.19 | -0.19 | -0.06 | -0.21 | -0.30 | -0.30 |
| TeF3   | 2.90 | 0.00 | -0.04 | -0.04 | -0.18 | -0.18 | -0.07 | -0.25 | -0.23 | -0.23 |
| TeH2   | 2.13 | 0.00 | 0.00  | -0.01 | -0.03 | -0.07 | 0.05  | 0.03  | 0.00  | -0.05 |
| TeO    | 2.36 | 0.00 | -0.03 | -0.03 | -0.18 | -0.18 | -0.02 | -0.16 | -0.22 | -0.22 |
| TeO2   | 3.03 | 0.00 | -0.04 | -0.04 | -0.28 | -0.28 | -0.05 | -0.28 | -0.33 | -0.33 |
| XeF2   | 1.21 | 0.00 | -0.05 | -0.05 | -0.04 | -0.04 | -0.11 | -0.21 | -0.22 | -0.22 |
| XeF4   | 1.45 | 0.00 | -0.07 | -0.07 | 0.01  | 0.01  | -0.14 | -0.30 | -0.22 | -0.22 |
| XeOF4  | 1.51 | 0.00 | -0.07 | -0.07 | 0.02  | 0.02  | -0.17 | -0.43 | -0.32 | -0.32 |
| BiCl6- | 2.64 | 0.00 | -0.01 | 0.00  | -0.07 | -0.07 | 0.05  | -0.06 | -0.06 | -0.06 |
| BiF    | 2.15 | 0.00 | -0.03 | -0.03 | -0.16 | -0.16 | 0.03  | -0.08 | -0.13 | -0.13 |
| BiF3   | 3.45 | 0.00 | -0.04 | -0.04 | -0.19 | -0.19 | 0.04  | -0.12 | -0.11 | -0.11 |
| BiH3   | 2.05 | 0.00 | 0.00  | -0.01 | -0.03 | -0.06 | 0.04  | 0.02  | 0.03  | -0.01 |
| BiO2   | 2.56 | 0.00 | -0.03 | -0.03 | -0.21 | -0.21 | 0.02  | -0.13 | -0.17 | -0.17 |
| PbF3   | 3.04 | 0.00 | -0.02 | -0.02 | -0.10 | -0.10 | -0.05 | -0.17 | -0.11 | -0.11 |
| PbH4   | 2.02 | 0.00 | 0.00  | -0.01 | -0.03 | -0.06 | 0.10  | 0.08  | 0.08  | 0.05  |
| PbO    | 2.75 | 0.00 | -0.03 | -0.03 | -0.16 | -0.16 | 0.00  | -0.10 | -0.14 | -0.14 |
| PbO2   | 2.61 | 0.00 | -0.02 | -0.02 | -0.21 | -0.21 | -0.09 | -0.26 | -0.27 | -0.27 |
| TlCl   | 2.23 | 0.00 | 0.00  | 0.00  | -0.03 | -0.03 | -0.01 | -0.04 | -0.04 | -0.04 |
| TlCl3  | 2.08 | 0.00 | 0.00  | 0.00  | -0.01 | -0.01 | 0.11  | 0.03  | 0.09  | 0.09  |
| TlH    | 1.34 | 0.00 | 0.00  | 0.00  | -0.02 | -0.03 | 0.00  | -0.01 | -0.02 | -0.02 |
| TlH3   | 1.69 | 0.00 | 0.00  | -0.01 | -0.04 | -0.07 | 0.09  | 0.08  | 0.06  | 0.03  |
| TlO    | 1.73 | 0.00 | -0.02 | -0.02 | -0.14 | -0.14 | 0.09  | 0.00  | -0.01 | -0.01 |
| CoCl3  | 2.65 | 0.00 | 0.00  | -0.03 | 0.13  | 0.13  | 0.06  | 0.03  | 0.13  | 0.13  |
| CoF2   | 3.38 | 0.00 | -0.03 | -0.06 | 0.10  | 0.09  | 0.05  | 0.01  | 0.09  | 0.09  |
| CoF3   | 3.46 | 0.00 | -0.03 | -0.07 | 0.12  | 0.11  | 0.03  | -0.01 | 0.11  | 0.11  |
| CrCO6  | 6.00 | 0.00 | 0.01  | 0.01  | 0.12  | 0.11  | 0.01  | -0.04 | 0.11  | 0.11  |
| CrCl3  | 2.79 | 0.00 | 0.00  | -0.02 | -0.02 | -0.03 | -0.01 | -0.07 | -0.03 | -0.03 |
| CrF3   | 3.90 | 0.00 | -0.01 | -0.05 | 0.01  | -0.03 | -0.05 | -0.11 | -0.03 | -0.03 |
| CrO3   | 4.16 | 0.00 | 0.01  | -0.02 | 0.05  | -0.02 | -0.02 | -0.12 | -0.02 | -0.02 |
| Cu2    | 1.02 | 0.00 | -0.01 | -0.02 | 0.24  | 0.23  | 0.06  | 0.06  | 0.23  | 0.23  |
| Cu2O   | 2.09 | 0.00 | -0.03 | -0.08 | 0.21  | 0.20  | 0.03  | 0.01  | 0.20  | 0.20  |
| Cu2S   | 2.01 | 0.00 | -0.02 | -0.05 | 0.20  | 0.19  | 0.05  | 0.02  | 0.19  | 0.19  |
| CuCN   | 4.17 | 0.00 | -0.01 | -0.01 | 0.14  | 0.14  | 0.05  | 0.01  | 0.14  | 0.14  |
| CuCl   | 1.85 | 0.00 | -0.03 | -0.05 | 0.10  | 0.10  | 0.02  | 0.00  | 0.10  | 0.10  |
| CuF    | 2.16 | 0.00 | -0.04 | -0.08 | 0.07  | 0.06  | -0.01 | -0.02 | 0.06  | 0.06  |

|          |      |       |       |       |       |       |       |       |       |       |
|----------|------|-------|-------|-------|-------|-------|-------|-------|-------|-------|
| CuH      | 1.46 | 0.00  | -0.01 | -0.03 | 0.08  | 0.04  | 0.03  | 0.02  | 0.07  | 0.04  |
| FeCO5    | 6.02 | 0.00  | 0.01  | 0.01  | 0.14  | 0.14  | 0.03  | -0.03 | 0.14  | 0.14  |
| FeF2     | 3.67 | 0.00  | -0.07 | -0.05 | 0.00  | -0.01 | 0.00  | -0.04 | -0.01 | -0.01 |
| FeF3     | 3.71 | 0.00  | -0.03 | -0.07 | 0.05  | 0.04  | -0.01 | -0.05 | 0.04  | 0.04  |
| FeO      | 2.71 | 0.00  | -0.02 | -0.06 | -0.04 | -0.07 | -0.02 | -0.07 | -0.07 | -0.07 |
| Ferrocen | 5.00 | 0.00  | 0.00  | -0.01 | 0.08  | 0.05  | 0.01  | -0.01 | 0.08  | 0.05  |
| MnF2     | 3.70 | 0.00  | -0.02 | -0.05 | -0.11 | -0.12 | -0.07 | -0.10 | -0.12 | -0.12 |
| MnO      | 2.70 | 0.00  | -0.02 | -0.07 | -0.14 | -0.17 | -0.10 | -0.14 | -0.17 | -0.17 |
| MnO2     | 3.57 | 0.00  | -0.01 | -0.04 | -0.02 | -0.07 | -0.04 | -0.11 | -0.07 | -0.07 |
| MnO3F    | 4.03 | 0.00  | -0.01 | -0.03 | 0.04  | -0.02 | -0.04 | -0.12 | -0.02 | -0.02 |
| MnO4-    | 4.83 | 0.00  | -0.01 | -0.04 | -0.03 | -0.09 | -0.05 | -0.12 | -0.09 | -0.09 |
| MnS      | 2.05 | 0.00  | -0.01 | -0.04 | -0.18 | -0.19 | -0.09 | -0.12 | -0.19 | -0.19 |
| NiCO4    | 5.91 | 0.00  | 0.00  | 0.01  | 0.19  | 0.19  | 0.06  | 0.00  | 0.19  | 0.19  |
| NiCl2    | 2.58 | 0.00  | 0.00  | -0.02 | 0.15  | 0.14  | 0.09  | 0.05  | 0.14  | 0.14  |
| NiF2     | 3.24 | 0.00  | -0.02 | -0.05 | 0.15  | 0.14  | 0.07  | 0.04  | 0.14  | 0.14  |
| NiF3     | 3.03 | 0.00  | -0.03 | -0.07 | 0.18  | 0.17  | 0.05  | 0.02  | 0.17  | 0.17  |
| NiO      | 2.37 | -0.01 | -0.02 | -0.04 | 0.10  | 0.08  | 0.07  | 0.04  | 0.08  | 0.08  |
| NiS      | 2.07 | 0.00  | -0.01 | -0.02 | 0.01  | 0.01  | 0.05  | 0.00  | 0.01  | 0.01  |
| ScCl3    | 3.77 | 0.00  | 0.01  | 0.00  | 0.05  | 0.00  | -0.02 | -0.06 | 0.00  | 0.00  |
| ScF3     | 5.06 | 0.00  | 0.00  | -0.02 | 0.07  | 0.01  | -0.06 | -0.10 | 0.01  | 0.01  |
| ScH3     | 2.20 | 0.00  | 0.00  | -0.01 | -0.02 | -0.05 | 0.00  | -0.01 | -0.02 | -0.05 |
| ScO      | 3.88 | 0.00  | 0.00  | -0.02 | 0.05  | 0.00  | -0.02 | -0.08 | 0.00  | 0.00  |
| TiCO4    | 5.72 | 0.00  | 0.00  | 0.00  | 0.10  | 0.09  | 0.01  | -0.04 | 0.09  | 0.09  |
| TiCl4    | 3.78 | 0.00  | 0.01  | 0.00  | 0.05  | 0.01  | -0.01 | -0.06 | 0.01  | 0.01  |
| TiF3     | 4.96 | 0.00  | 0.00  | -0.01 | 0.07  | 0.00  | -0.05 | -0.10 | 0.00  | 0.00  |
| TiF4     | 5.21 | 0.00  | 0.00  | -0.01 | 0.10  | 0.02  | -0.05 | -0.12 | 0.02  | 0.02  |
| TiH4     | 2.30 | 0.00  | 0.00  | -0.01 | 0.00  | -0.05 | 0.01  | 0.00  | 0.00  | -0.05 |
| TiO      | 3.99 | 0.00  | 0.01  | -0.02 | 0.05  | -0.01 | -0.02 | -0.08 | -0.01 | -0.01 |
| TiO2     | 4.92 | 0.00  | 0.01  | -0.01 | 0.07  | 0.00  | -0.03 | -0.09 | 0.00  | 0.00  |
| TiS2     | 3.49 | 0.00  | 0.01  | 0.00  | 0.03  | 0.00  | 0.00  | -0.04 | 0.00  | 0.00  |
| VH5      | 2.08 | 0.00  | 0.00  | -0.01 | 0.10  | 0.04  | 0.06  | 0.05  | 0.10  | 0.04  |
| VO       | 3.60 | 0.00  | 0.01  | -0.02 | 0.29  | 0.23  | 0.10  | 0.04  | 0.23  | 0.23  |
| VOF3     | 4.92 | 0.00  | 0.00  | -0.02 | 0.21  | 0.13  | 0.01  | -0.06 | 0.13  | 0.13  |
| ZnCl2    | 2.18 | 0.00  | -0.03 | -0.03 | 0.01  | 0.01  | -0.01 | -0.04 | 0.01  | 0.01  |
| ZnF2     | 2.82 | -0.01 | -0.06 | -0.07 | -0.04 | -0.05 | -0.05 | -0.08 | -0.05 | -0.05 |
| ZnH2     | 1.55 | 0.00  | -0.01 | -0.02 | 0.01  | -0.04 | 0.02  | 0.00  | 0.01  | -0.04 |
| ZnMe2    | 3.48 | 0.00  | 0.00  | -0.01 | 0.03  | -0.02 | 0.01  | 0.00  | 0.03  | -0.02 |
| Ag2      | 0.87 | 0.00  | -0.01 | -0.02 | -0.03 | -0.04 | -0.03 | -0.03 | -0.04 | -0.04 |
| AgCl     | 1.55 | 0.00  | -0.01 | -0.03 | -0.01 | -0.03 | -0.03 | -0.06 | -0.03 | -0.03 |
| CdF2     | 2.39 | -0.01 | -0.05 | -0.08 | -0.06 | -0.08 | -0.08 | -0.11 | -0.08 | -0.08 |
| CdMe2    | 3.39 | 0.00  | 0.00  | -0.01 | -0.01 | -0.05 | -0.01 | -0.02 | -0.01 | -0.05 |
| MoCO6    | 6.17 | 0.00  | 0.00  | 0.00  | 0.10  | 0.08  | 0.00  | -0.07 | 0.08  | 0.08  |
| MoF3     | 4.13 | 0.00  | -0.01 | -0.05 | 0.06  | -0.05 | -0.10 | -0.23 | -0.05 | -0.05 |
| MoH      | 1.35 | 0.00  | 0.00  | -0.01 | -0.01 | -0.04 | -0.01 | -0.02 | -0.02 | -0.04 |
| MoO2     | 4.41 | 0.00  | 0.00  | -0.04 | 0.03  | -0.14 | -0.07 | -0.25 | -0.14 | -0.14 |
| MoO3     | 4.95 | 0.00  | 0.00  | -0.04 | 0.04  | -0.16 | -0.08 | -0.28 | -0.16 | -0.16 |
| NbF3     | 4.70 | 0.00  | 0.00  | -0.04 | 0.11  | -0.03 | -0.10 | -0.24 | -0.03 | -0.03 |
| NbO      | 4.11 | 0.00  | 0.01  | -0.02 | 0.05  | -0.08 | -0.03 | -0.16 | -0.08 | -0.08 |
| NbO2     | 5.13 | 0.00  | 0.00  | -0.03 | 0.06  | -0.11 | -0.05 | -0.22 | -0.11 | -0.11 |
| NbO2F    | 5.39 | 0.00  | 0.00  | -0.04 | 0.07  | -0.10 | -0.08 | -0.24 | -0.10 | -0.10 |
| PdCO4    | 5.72 | 0.00  | 0.00  | 0.00  | 0.08  | 0.07  | 0.00  | -0.07 | 0.07  | 0.07  |
| PdF      | 1.85 | -0.01 | 0.00  | -0.03 | -0.03 | -0.06 | -0.05 | -0.08 | -0.06 | -0.06 |
| PdO2     | 2.14 | 0.00  | -0.01 | -0.05 | -0.03 | -0.08 | -0.07 | -0.14 | -0.08 | -0.08 |
| RhF      | 2.03 | -0.01 | -0.03 | -0.07 | 0.05  | -0.06 | -0.08 | -0.13 | -0.06 | -0.06 |
| RhF4     | 2.93 | 0.00  | -0.04 | -0.08 | 0.03  | 0.00  | -0.11 | -0.16 | 0.00  | 0.00  |
| RhF6     | 3.01 | 0.00  | -0.03 | -0.09 | 0.05  | -0.02 | -0.14 | -0.24 | -0.02 | -0.02 |
| RhO      | 2.54 | 0.00  | -0.01 | -0.06 | -0.03 | -0.10 | -0.07 | -0.16 | -0.10 | -0.10 |
| RuCO5    | 6.15 | 0.00  | 0.00  | 0.00  | 0.09  | 0.08  | 0.00  | -0.07 | 0.08  | 0.08  |
| RuF      | 2.18 | 0.00  | 0.00  | -0.04 | 0.03  | -0.01 | -0.03 | -0.07 | -0.01 | -0.01 |
| RuO      | 2.84 | 0.00  | 0.01  | -0.02 | 0.00  | -0.08 | -0.04 | -0.13 | -0.08 | -0.08 |
| RuO2     | 3.89 | 0.00  | 0.00  | -0.05 | 0.00  | -0.17 | -0.08 | -0.27 | -0.17 | -0.17 |
| RuO4     | 4.47 | 0.00  | -0.01 | -0.06 | -0.01 | -0.19 | -0.09 | -0.31 | -0.19 | -0.19 |
| Tc2O7    | 5.23 | 0.00  | 0.01  | -0.04 | 0.03  | -0.18 | -0.10 | -0.32 | -0.18 | -0.18 |
| TcO      | 3.08 | 0.00  | 0.05  | 0.02  | 0.00  | -0.09 | -0.05 | -0.15 | -0.09 | -0.09 |
| TcO3F    | 4.96 | 0.00  | 0.01  | -0.04 | 0.02  | -0.17 | -0.10 | -0.31 | -0.17 | -0.17 |
| YF       | 3.53 | 0.00  | -0.01 | -0.03 | 0.06  | -0.02 | -0.06 | -0.13 | -0.02 | -0.02 |
| YF3      | 5.09 | -0.01 | -0.03 | -0.05 | 0.09  | -0.03 | -0.08 | -0.16 | -0.03 | -0.03 |
| YO       | 3.86 | 0.00  | -0.02 | -0.04 | 0.00  | -0.09 | -0.04 | -0.14 | -0.09 | -0.09 |
| ZrF      | 3.41 | 0.00  | -0.01 | -0.03 | 0.06  | -0.02 | -0.06 | -0.14 | -0.02 | -0.02 |
| ZrF3     | 5.24 | 0.00  | -0.01 | -0.04 | 0.11  | -0.02 | -0.09 | -0.20 | -0.02 | -0.02 |
| ZrO      | 4.27 | 0.00  | -0.01 | -0.03 | 0.03  | -0.09 | -0.04 | -0.15 | -0.09 | -0.09 |
| ZrO2     | 5.16 | 0.00  | -0.01 | -0.04 | 0.04  | -0.11 | -0.05 | -0.19 | -0.11 | -0.11 |
| Au2      | 1.13 | -0.01 | -0.02 | -0.04 | -0.05 | -0.09 | -0.06 | -0.08 | -0.09 | -0.09 |
| Au3-     | 2.39 | -0.01 | -0.03 | -0.04 | -0.08 | -0.11 | -0.09 | -0.11 | -0.11 | -0.11 |
| AuCl     | 1.47 | 0.00  | -0.02 | -0.03 | -0.05 | -0.08 | -0.06 | -0.12 | -0.08 | -0.08 |

|        |      |      |       |       |       |       |       |       |       |       |
|--------|------|------|-------|-------|-------|-------|-------|-------|-------|-------|
| AuCl3  | 1.68 | 0.00 | -0.01 | -0.03 | -0.05 | -0.09 | -0.09 | -0.17 | -0.09 | -0.09 |
| HfF    | 3.52 | 0.00 | 0.00  | -0.02 | 0.02  | -0.06 | -0.09 | -0.17 | -0.06 | -0.06 |
| HfF3   | 5.24 | 0.00 | 0.00  | -0.03 | 0.06  | -0.06 | -0.12 | -0.22 | -0.06 | -0.06 |
| HfO    | 4.41 | 0.00 | 0.00  | -0.01 | -0.02 | -0.13 | -0.07 | -0.16 | -0.13 | -0.13 |
| HfO2   | 4.90 | 0.00 | -0.01 | -0.03 | -0.01 | -0.14 | -0.08 | -0.20 | -0.14 | -0.14 |
| Hg2Cl2 | 1.18 | 0.00 | -0.01 | -0.02 | -0.11 | -0.14 | -0.13 | -0.18 | -0.14 | -0.14 |
| HgF2   | 1.94 | 0.00 | -0.02 | -0.04 | -0.09 | -0.15 | -0.12 | -0.19 | -0.15 | -0.15 |
| HgMe2  | 3.36 | 0.00 | 0.00  | -0.01 | -0.02 | -0.07 | -0.02 | -0.04 | -0.03 | -0.07 |
| IrF6   | 3.42 | 0.00 | -0.01 | -0.05 | 0.02  | -0.14 | -0.17 | -0.34 | -0.14 | -0.14 |
| OsCO5  | 6.25 | 0.00 | 0.00  | 0.00  | 0.05  | 0.03  | -0.04 | -0.12 | 0.03  | 0.03  |
| OsO2   | 4.29 | 0.00 | -0.01 | -0.06 | -0.09 | -0.29 | -0.14 | -0.36 | -0.29 | -0.29 |
| OsO3   | 4.91 | 0.00 | -0.01 | -0.05 | -0.08 | -0.31 | -0.15 | -0.41 | -0.31 | -0.31 |
| OsO4   | 5.00 | 0.00 | 0.00  | -0.04 | -0.08 | -0.36 | -0.17 | -0.46 | -0.36 | -0.36 |
| OsOF5  | 3.97 | 0.00 | 0.00  | -0.04 | 0.02  | -0.19 | -0.18 | -0.39 | -0.19 | -0.19 |
| PtCO4  | 5.90 | 0.00 | 0.00  | 0.00  | 0.04  | 0.02  | -0.05 | -0.12 | 0.02  | 0.02  |
| PtO    | 2.46 | 0.00 | -0.02 | -0.06 | -0.06 | -0.17 | -0.10 | -0.22 | -0.17 | -0.17 |
| PtO2   | 3.43 | 0.00 | -0.01 | -0.05 | -0.10 | -0.32 | -0.16 | -0.40 | -0.32 | -0.32 |
| ReH    | 1.26 | 0.00 | 0.00  | -0.01 | -0.04 | -0.08 | -0.03 | -0.04 | -0.04 | -0.08 |
| ReO    | 2.85 | 0.00 | -0.01 | -0.04 | -0.13 | -0.25 | -0.16 | -0.29 | -0.25 | -0.25 |
| ReO2   | 4.17 | 0.00 | -0.01 | -0.03 | -0.13 | -0.32 | -0.18 | -0.40 | -0.32 | -0.32 |
| ReO3   | 5.04 | 0.00 | 0.00  | -0.04 | -0.09 | -0.32 | -0.16 | -0.41 | -0.32 | -0.32 |
| ReO3F  | 5.22 | 0.00 | 0.00  | -0.04 | -0.05 | -0.30 | -0.16 | -0.42 | -0.30 | -0.30 |
| TaF    | 3.18 | 0.00 | 0.00  | -0.04 | 0.00  | -0.10 | -0.09 | -0.21 | -0.10 | -0.10 |
| TaF3   | 5.00 | 0.00 | 0.00  | -0.04 | 0.05  | -0.09 | -0.13 | -0.28 | -0.09 | -0.09 |
| TaO2F  | 5.40 | 0.00 | 0.00  | -0.04 | -0.02 | -0.19 | -0.13 | -0.30 | -0.19 | -0.19 |
| WCO6   | 6.31 | 0.00 | 0.00  | 0.00  | 0.07  | 0.06  | -0.02 | -0.09 | 0.06  | 0.06  |
| WF3    | 4.49 | 0.00 | 0.00  | -0.04 | 0.02  | -0.11 | -0.13 | -0.27 | -0.11 | -0.11 |
| WH     | 1.76 | 0.00 | 0.00  | 0.00  | -0.03 | -0.06 | -0.02 | -0.03 | -0.03 | -0.06 |
| WO     | 3.45 | 0.00 | 0.00  | -0.03 | -0.02 | -0.15 | -0.06 | -0.20 | -0.15 | -0.15 |
| WO2    | 5.00 | 0.00 | 0.00  | -0.03 | -0.03 | -0.21 | -0.10 | -0.28 | -0.21 | -0.21 |
| WO3    | 5.22 | 0.00 | 0.00  | -0.04 | -0.09 | -0.31 | -0.16 | -0.39 | -0.31 | -0.31 |

!  
!  
!

!=====  
! atomization energies per atom /eV: MP2  
!=====

| !compound | def2- |        |        |        |        |        | def-   |        |        |        |
|-----------|-------|--------|--------|--------|--------|--------|--------|--------|--------|--------|
|           | QZVPP | QZVP   | TZVPP  | TZVP   | SVP    | SV(P)  | TZVPP  | TZVP   | SVP    | SV(P)  |
| !         |       | -QZVPP | -QZVPP | -QZVPP | -QZVPP | -QZVPP | -QZVPP | -QZVPP | -QZVPP | -QZVPP |
| !         |       |        |        |        |        |        |        |        |        |        |
| BaF       | 3.07  | -0.02  | -0.09  | -0.09  | -0.36  | -0.36  | -0.21  | -0.36  | -0.36  | -0.36  |
| BaF2      | 4.12  | -0.03  | -0.15  | -0.15  | -0.48  | -0.48  | -0.26  | -0.44  | -0.48  | -0.48  |
| BaH2      | 1.38  | -0.01  | -0.03  | -0.20  | -0.25  | -0.44  | -0.07  | -0.24  | -0.25  | -0.44  |
| BaO       | 3.02  | -0.06  | -0.20  | -0.20  | -0.70  | -0.70  | -0.38  | -0.67  | -0.70  | -0.70  |
| BaS       | 2.20  | -0.04  | -0.15  | -0.15  | -0.57  | -0.57  | -0.24  | -0.59  | -0.57  | -0.57  |
| Be2F4     | 4.93  | 0.00   | -0.19  | -0.19  | -0.33  | -0.33  | -0.27  | -0.47  | -0.33  | -0.33  |
| Be2H4     | 2.38  | 0.00   | -0.07  | -0.14  | -0.17  | -0.40  | -0.09  | -0.20  | -0.17  | -0.40  |
| Be4       | 1.13  | 0.00   | -0.16  | -0.16  | -0.31  | -0.31  | -0.40  | -0.40  | -0.31  | -0.31  |
| BeC2H6    | 3.67  | 0.00   | -0.06  | -0.12  | -0.16  | -0.35  | -0.06  | -0.18  | -0.16  | -0.35  |
| BeF2O2H4  | 4.00  | 0.00   | -0.10  | -0.16  | -0.26  | -0.46  | -0.13  | -0.30  | -0.26  | -0.46  |
| BeH2      | 2.14  | 0.00   | -0.06  | -0.12  | -0.12  | -0.34  | -0.05  | -0.15  | -0.12  | -0.34  |
| BeS       | 1.82  | 0.00   | -0.16  | -0.16  | -0.36  | -0.36  | -0.22  | -0.42  | -0.36  | -0.36  |
| CaCl2     | 3.14  | 0.01   | -0.15  | -0.16  | -0.32  | -0.32  | -0.16  | -0.40  | -0.32  | -0.32  |
| CaF2      | 4.02  | 0.01   | -0.19  | -0.19  | -0.35  | -0.35  | -0.19  | -0.34  | -0.35  | -0.35  |
| CaH2      | 1.37  | 0.01   | -0.06  | -0.17  | -0.18  | -0.35  | -0.06  | -0.19  | -0.18  | -0.35  |
| CsF       | 2.72  | -0.04  | -0.21  | -0.24  | -0.52  | -0.52  | -0.35  | -0.54  | -1.05  | -1.05  |
| CsH       | 0.80  | -0.03  | -0.11  | -0.22  | -0.23  | -0.33  | -0.17  | -0.32  | -0.35  | -0.45  |
| CsO       | 1.41  | -0.03  | -0.20  | -0.21  | -0.47  | -0.47  | -0.34  | -0.49  | -0.92  | -0.92  |
| K2S       | 1.63  | 0.01   | -0.14  | -0.14  | -0.36  | -0.36  | -0.27  | -0.55  | -0.61  | -0.61  |
| K3P       | 0.99  | 0.00   | -0.12  | -0.13  | -0.27  | -0.27  | -0.24  | -0.50  | -0.51  | -0.51  |
| KBr       | 2.06  | 0.00   | -0.09  | -0.09  | -0.23  | -0.23  | -0.14  | -0.29  | -0.35  | -0.35  |
| KCl       | 2.23  | 0.01   | -0.11  | -0.11  | -0.36  | -0.36  | -0.19  | -0.39  | -0.56  | -0.56  |
| KF        | 2.63  | 0.00   | -0.15  | -0.15  | -0.44  | -0.44  | -0.27  | -0.43  | -0.83  | -0.83  |
| KH        | 0.78  | 0.00   | -0.06  | -0.13  | -0.15  | -0.26  | -0.10  | -0.22  | -0.23  | -0.33  |
| KI        | 1.83  | 0.01   | -0.09  | -0.09  | -0.21  | -0.21  | -0.23  | -0.31  | -0.30  | -0.30  |
| Li2       | 0.38  | 0.00   | -0.04  | -0.10  | -0.09  | -0.09  | -0.10  | -0.12  | -0.13  | -0.13  |
| Li2O      | 2.61  | 0.00   | -0.13  | -0.17  | -0.28  | -0.28  | -0.17  | -0.44  | -0.47  | -0.47  |
| Li4C4H12  | 3.35  | 0.00   | -0.05  | -0.12  | -0.15  | -0.32  | -0.06  | -0.18  | -0.17  | -0.35  |
| Li4Cl4    | 3.27  | 0.00   | -0.10  | -0.15  | -0.14  | -0.14  | -0.15  | -0.31  | -0.20  | -0.20  |
| Li4H4     | 1.94  | 0.00   | -0.06  | -0.18  | -0.14  | -0.29  | -0.08  | -0.18  | -0.18  | -0.32  |
| Li8       | 0.78  | 0.00   | -0.07  | -0.17  | -0.14  | -0.14  | -0.17  | -0.21  | -0.22  | -0.22  |
| LiBH4     | 2.88  | 0.00   | -0.04  | -0.10  | -0.11  | -0.29  | -0.04  | -0.14  | -0.12  | -0.30  |
| LiCl      | 2.47  | 0.00   | -0.09  | -0.13  | -0.29  | -0.29  | -0.13  | -0.33  | -0.36  | -0.36  |

|        |      |       |       |       |       |       |       |       |       |       |
|--------|------|-------|-------|-------|-------|-------|-------|-------|-------|-------|
| LiF    | 3.09 | 0.00  | -0.11 | -0.15 | -0.32 | -0.32 | -0.15 | -0.34 | -0.42 | -0.42 |
| LiH    | 1.13 | 0.00  | -0.05 | -0.14 | -0.13 | -0.25 | -0.06 | -0.15 | -0.15 | -0.27 |
| LiSLi  | 2.15 | 0.00  | -0.12 | -0.16 | -0.36 | -0.36 | -0.16 | -0.40 | -0.49 | -0.49 |
| Mg4    | 0.33 | 0.00  | -0.08 | -0.08 | -0.04 | -0.04 | -0.28 | -0.40 | -0.42 | -0.42 |
| MgCl2  | 2.85 | 0.00  | -0.10 | -0.10 | -0.19 | -0.19 | -0.22 | -0.48 | -0.52 | -0.52 |
| MgF    | 2.51 | 0.00  | -0.09 | -0.09 | -0.14 | -0.14 | -0.18 | -0.41 | -0.55 | -0.55 |
| MgF2   | 3.80 | 0.00  | -0.13 | -0.13 | -0.21 | -0.21 | -0.29 | -0.47 | -0.60 | -0.60 |
| MgH2   | 1.46 | 0.00  | -0.04 | -0.12 | -0.09 | -0.26 | -0.05 | -0.15 | -0.14 | -0.32 |
| Na2O   | 1.85 | -0.01 | -0.13 | -0.13 | -0.26 | -0.26 | -0.24 | -0.40 | -0.42 | -0.42 |
| Na2S   | 1.69 | 0.00  | -0.12 | -0.12 | -0.30 | -0.30 | -0.19 | -0.43 | -0.43 | -0.43 |
| Na3N   | 0.77 | -0.01 | -0.10 | -0.10 | -0.29 | -0.29 | -0.25 | -0.44 | -0.48 | -0.48 |
| Na3P   | 1.14 | 0.00  | -0.10 | -0.11 | -0.25 | -0.25 | -0.18 | -0.39 | -0.38 | -0.38 |
| NaCl   | 2.16 | 0.00  | -0.10 | -0.10 | -0.27 | -0.27 | -0.15 | -0.34 | -0.39 | -0.39 |
| NaF    | 2.59 | 0.00  | -0.12 | -0.12 | -0.32 | -0.32 | -0.20 | -0.32 | -0.54 | -0.54 |
| NaH    | 0.86 | 0.00  | -0.04 | -0.10 | -0.13 | -0.24 | -0.07 | -0.17 | -0.17 | -0.27 |
| PLi3   | 1.52 | 0.00  | -0.11 | -0.17 | -0.31 | -0.31 | -0.16 | -0.36 | -0.38 | -0.38 |
| RbF    | 2.56 | -0.02 | -0.13 | -0.14 | -0.47 | -0.47 | -0.26 | -0.40 | -0.85 | -0.85 |
| RbH    | 0.72 | -0.01 | -0.04 | -0.14 | -0.15 | -0.26 | -0.09 | -0.20 | -0.23 | -0.33 |
| RbO    | 1.27 | -0.02 | -0.11 | -0.12 | -0.43 | -0.43 | -0.25 | -0.38 | -0.75 | -0.75 |
| SrF    | 2.87 | -0.03 | -0.14 | -0.20 | -0.26 | -0.26 | -0.13 | -0.27 | -0.26 | -0.26 |
| SrF2   | 3.96 | -0.04 | -0.19 | -0.25 | -0.36 | -0.36 | -0.16 | -0.33 | -0.36 | -0.36 |
| SrH2   | 1.27 | -0.01 | -0.06 | -0.22 | -0.18 | -0.36 | -0.01 | -0.17 | -0.18 | -0.36 |
| SrO    | 2.34 | -0.05 | -0.21 | -0.35 | -0.53 | -0.53 | -0.22 | -0.49 | -0.53 | -0.53 |
| SrS    | 1.74 | -0.03 | -0.18 | -0.25 | -0.42 | -0.42 | -0.13 | -0.44 | -0.42 | -0.42 |
| B2H6   | 3.25 | 0.00  | -0.03 | -0.08 | -0.10 | -0.29 | -0.03 | -0.12 | -0.10 | -0.29 |
| B3N3H6 | 4.46 | 0.00  | -0.07 | -0.11 | -0.16 | -0.31 | -0.07 | -0.23 | -0.16 | -0.31 |
| B4H4   | 3.74 | 0.00  | -0.04 | -0.07 | -0.08 | -0.20 | -0.04 | -0.14 | -0.08 | -0.20 |
| BF3    | 5.32 | 0.00  | -0.07 | -0.07 | -0.14 | -0.14 | -0.07 | -0.25 | -0.14 | -0.14 |
| BH3    | 3.00 | 0.00  | -0.03 | -0.08 | -0.09 | -0.27 | -0.03 | -0.10 | -0.09 | -0.27 |
| BH3CO  | 4.15 | 0.00  | -0.05 | -0.09 | -0.13 | -0.25 | -0.05 | -0.18 | -0.13 | -0.25 |
| BH3NH3 | 3.27 | 0.00  | -0.04 | -0.11 | -0.14 | -0.36 | -0.04 | -0.15 | -0.14 | -0.36 |
| C2H2   | 4.44 | 0.00  | -0.06 | -0.10 | -0.15 | -0.28 | -0.06 | -0.19 | -0.15 | -0.28 |
| C2H3N  | 3.89 | 0.00  | -0.08 | -0.12 | -0.21 | -0.36 | -0.08 | -0.25 | -0.21 | -0.36 |
| C2H4   | 4.05 | 0.00  | -0.05 | -0.10 | -0.13 | -0.31 | -0.05 | -0.16 | -0.13 | -0.31 |
| C2H6   | 3.83 | 0.00  | -0.04 | -0.10 | -0.12 | -0.32 | -0.04 | -0.14 | -0.12 | -0.32 |
| C4H4   | 4.37 | 0.00  | -0.07 | -0.11 | -0.14 | -0.27 | -0.07 | -0.24 | -0.14 | -0.27 |
| C6H6   | 5.01 | 0.00  | -0.06 | -0.10 | -0.14 | -0.27 | -0.06 | -0.21 | -0.14 | -0.27 |
| CF4    | 4.34 | 0.00  | -0.07 | -0.07 | -0.16 | -0.16 | -0.07 | -0.29 | -0.16 | -0.16 |
| CH2O   | 4.11 | 0.00  | -0.06 | -0.10 | -0.17 | -0.30 | -0.06 | -0.20 | -0.17 | -0.30 |
| CH2O2  | 3.63 | 0.00  | -0.07 | -0.11 | -0.25 | -0.35 | -0.07 | -0.27 | -0.25 | -0.35 |
| CH3N   | 3.79 | 0.00  | -0.06 | -0.12 | -0.19 | -0.37 | -0.06 | -0.21 | -0.19 | -0.37 |
| CH3OH  | 3.71 | 0.00  | -0.05 | -0.12 | -0.18 | -0.40 | -0.05 | -0.19 | -0.18 | -0.40 |
| CH4    | 3.59 | 0.00  | -0.04 | -0.10 | -0.12 | -0.34 | -0.04 | -0.13 | -0.12 | -0.34 |
| CO     | 5.84 | 0.00  | -0.09 | -0.09 | -0.17 | -0.17 | -0.09 | -0.26 | -0.17 | -0.17 |
| CO2    | 5.92 | 0.00  | -0.10 | -0.10 | -0.21 | -0.21 | -0.10 | -0.35 | -0.21 | -0.21 |
| F2     | 0.91 | 0.00  | -0.05 | -0.05 | -0.20 | -0.20 | -0.05 | -0.17 | -0.20 | -0.20 |
| H2     | 2.26 | 0.00  | -0.02 | -0.08 | -0.13 | -0.33 | -0.02 | -0.08 | -0.13 | -0.33 |
| H2CO3  | 4.61 | 0.00  | -0.08 | -0.12 | -0.23 | -0.39 | -0.08 | -0.31 | -0.23 | -0.39 |
| H2O    | 3.39 | 0.00  | -0.07 | -0.16 | -0.29 | -0.61 | -0.07 | -0.23 | -0.29 | -0.61 |
| H2O2   | 2.96 | 0.00  | -0.07 | -0.14 | -0.29 | -0.52 | -0.07 | -0.26 | -0.29 | -0.52 |
| HCN    | 4.61 | 0.00  | -0.08 | -0.11 | -0.21 | -0.29 | -0.08 | -0.24 | -0.21 | -0.29 |
| HF     | 3.14 | 0.00  | -0.06 | -0.13 | -0.28 | -0.57 | -0.06 | -0.19 | -0.28 | -0.57 |
| HNC    | 4.36 | 0.00  | -0.09 | -0.12 | -0.21 | -0.32 | -0.09 | -0.26 | -0.21 | -0.32 |
| HNO    | 3.01 | 0.00  | -0.09 | -0.12 | -0.27 | -0.38 | -0.09 | -0.30 | -0.27 | -0.38 |
| HNO2   | 3.45 | 0.00  | -0.10 | -0.13 | -0.30 | -0.37 | -0.10 | -0.35 | -0.30 | -0.37 |
| HNO3   | 3.53 | 0.00  | -0.10 | -0.13 | -0.31 | -0.40 | -0.10 | -0.38 | -0.31 | -0.40 |
| N2     | 5.10 | 0.00  | -0.13 | -0.13 | -0.33 | -0.33 | -0.13 | -0.35 | -0.33 | -0.33 |
| N2H2   | 3.12 | 0.00  | -0.09 | -0.14 | -0.28 | -0.46 | -0.09 | -0.29 | -0.28 | -0.46 |
| N2H4   | 3.13 | 0.00  | -0.07 | -0.15 | -0.26 | -0.49 | -0.07 | -0.24 | -0.26 | -0.49 |
| N4     | 3.20 | 0.00  | -0.14 | -0.14 | -0.56 | -0.56 | -0.14 | -0.54 | -0.56 | -0.56 |
| NF3    | 2.33 | 0.00  | -0.09 | -0.09 | -0.32 | -0.32 | -0.09 | -0.32 | -0.32 | -0.32 |
| NH3    | 3.18 | 0.00  | -0.06 | -0.14 | -0.24 | -0.52 | -0.06 | -0.21 | -0.24 | -0.52 |
| NH4F   | 3.26 | 0.00  | -0.06 | -0.14 | -0.24 | -0.51 | -0.06 | -0.20 | -0.24 | -0.51 |
| OF2    | 1.44 | 0.00  | -0.07 | -0.07 | -0.29 | -0.29 | -0.07 | -0.26 | -0.29 | -0.29 |
| Al2O3  | 4.34 | 0.00  | -0.11 | -0.12 | -0.43 | -0.43 | -0.16 | -0.44 | -0.43 | -0.43 |
| Al2S3  | 3.22 | 0.00  | -0.09 | -0.10 | -0.33 | -0.33 | -0.12 | -0.39 | -0.33 | -0.33 |
| AlCl3  | 3.51 | 0.00  | -0.08 | -0.08 | -0.26 | -0.26 | -0.10 | -0.32 | -0.26 | -0.26 |
| AlF3   | 4.88 | 0.00  | -0.10 | -0.10 | -0.32 | -0.32 | -0.14 | -0.39 | -0.32 | -0.32 |
| AlH3   | 2.25 | 0.00  | -0.03 | -0.09 | -0.10 | -0.29 | -0.04 | -0.12 | -0.10 | -0.29 |
| AlN    | 1.10 | 0.00  | -0.07 | -0.07 | -0.27 | -0.27 | -0.09 | -0.25 | -0.27 | -0.27 |
| CS2    | 4.23 | 0.00  | -0.08 | -0.09 | -0.30 | -0.30 | -0.12 | -0.41 | -0.30 | -0.30 |
| Cl2    | 1.31 | 0.00  | -0.08 | -0.08 | -0.36 | -0.36 | -0.10 | -0.34 | -0.36 | -0.36 |
| ClF    | 1.42 | 0.00  | -0.08 | -0.08 | -0.32 | -0.32 | -0.10 | -0.29 | -0.32 | -0.32 |
| ClF3   | 1.49 | 0.00  | -0.11 | -0.11 | -0.55 | -0.55 | -0.15 | -0.45 | -0.55 | -0.55 |
| H2SO4  | 3.82 | 0.00  | -0.11 | -0.15 | -0.62 | -0.75 | -0.20 | -0.61 | -0.62 | -0.75 |

|        |      |      |       |       |       |       |       |       |       |       |
|--------|------|------|-------|-------|-------|-------|-------|-------|-------|-------|
| H3PO4  | 4.24 | 0.00 | -0.10 | -0.16 | -0.49 | -0.67 | -0.15 | -0.49 | -0.49 | -0.67 |
| HCP    | 3.68 | 0.00 | -0.08 | -0.12 | -0.24 | -0.32 | -0.10 | -0.29 | -0.24 | -0.32 |
| HCl    | 2.31 | 0.00 | -0.04 | -0.11 | -0.20 | -0.45 | -0.05 | -0.18 | -0.20 | -0.45 |
| HSH    | 2.58 | 0.00 | -0.05 | -0.12 | -0.21 | -0.47 | -0.06 | -0.20 | -0.21 | -0.47 |
| HSSH   | 2.58 | 0.00 | -0.07 | -0.13 | -0.32 | -0.51 | -0.09 | -0.30 | -0.32 | -0.51 |
| P2     | 2.48 | 0.00 | -0.13 | -0.18 | -0.41 | -0.41 | -0.16 | -0.44 | -0.41 | -0.41 |
| PF3    | 4.06 | 0.00 | -0.11 | -0.13 | -0.50 | -0.50 | -0.16 | -0.52 | -0.50 | -0.50 |
| PF5    | 4.19 | 0.00 | -0.11 | -0.12 | -0.51 | -0.51 | -0.17 | -0.58 | -0.51 | -0.51 |
| PH3    | 2.50 | 0.00 | -0.04 | -0.12 | -0.19 | -0.43 | -0.06 | -0.19 | -0.19 | -0.43 |
| S2     | 2.27 | 0.00 | -0.09 | -0.10 | -0.38 | -0.38 | -0.13 | -0.40 | -0.38 | -0.38 |
| S5     | 2.66 | 0.00 | -0.14 | -0.15 | -0.65 | -0.65 | -0.19 | -0.63 | -0.65 | -0.65 |
| SF2    | 2.65 | 0.00 | -0.11 | -0.11 | -0.46 | -0.46 | -0.15 | -0.44 | -0.46 | -0.46 |
| SF4    | 3.02 | 0.00 | -0.12 | -0.12 | -0.56 | -0.56 | -0.18 | -0.56 | -0.56 | -0.56 |
| SF6    | 3.16 | 0.00 | -0.10 | -0.11 | -0.53 | -0.53 | -0.18 | -0.62 | -0.53 | -0.53 |
| SiCl4  | 3.49 | 0.00 | -0.09 | -0.10 | -0.37 | -0.37 | -0.13 | -0.41 | -0.37 | -0.37 |
| SiF4   | 5.18 | 0.00 | -0.10 | -0.11 | -0.44 | -0.44 | -0.15 | -0.52 | -0.44 | -0.44 |
| SiH4   | 2.73 | 0.00 | -0.03 | -0.10 | -0.14 | -0.36 | -0.05 | -0.15 | -0.14 | -0.36 |
| SiO2   | 4.59 | 0.00 | -0.13 | -0.13 | -0.55 | -0.55 | -0.18 | -0.53 | -0.55 | -0.55 |
| SiS2   | 3.40 | 0.00 | -0.10 | -0.11 | -0.43 | -0.43 | -0.15 | -0.47 | -0.43 | -0.43 |
| As4    | 2.70 | 0.02 | -0.12 | -0.12 | -0.57 | -0.57 | -0.12 | -0.53 | -0.57 | -0.57 |
| As4S4  | 2.66 | 0.01 | -0.13 | -0.13 | -0.61 | -0.61 | -0.15 | -0.60 | -0.61 | -0.61 |
| AsCl3  | 2.45 | 0.01 | -0.09 | -0.09 | -0.42 | -0.42 | -0.10 | -0.41 | -0.42 | -0.42 |
| AsCl6- | 2.71 | 0.02 | -0.09 | -0.10 | -0.47 | -0.47 | -0.10 | -0.42 | -0.47 | -0.47 |
| AsH3   | 2.26 | 0.02 | -0.03 | -0.11 | -0.17 | -0.39 | -0.03 | -0.16 | -0.17 | -0.39 |
| Br2    | 1.18 | 0.00 | -0.08 | -0.08 | -0.27 | -0.27 | -0.08 | -0.24 | -0.27 | -0.27 |
| BrCl   | 1.25 | 0.00 | -0.08 | -0.08 | -0.32 | -0.32 | -0.09 | -0.29 | -0.32 | -0.32 |
| BrO4-  | 2.89 | 0.02 | -0.13 | -0.13 | -0.88 | -0.88 | -0.13 | -0.69 | -0.88 | -0.88 |
| GaCl   | 2.53 | 0.00 | -0.06 | -0.06 | -0.23 | -0.23 | -0.06 | -0.22 | -0.23 | -0.23 |
| GaCl3  | 2.99 | 0.03 | -0.03 | -0.04 | -0.19 | -0.19 | -0.04 | -0.24 | -0.19 | -0.19 |
| GaF    | 3.23 | 0.00 | -0.07 | -0.07 | -0.23 | -0.23 | -0.07 | -0.22 | -0.23 | -0.23 |
| GaF2   | 3.30 | 0.04 | -0.03 | -0.03 | -0.18 | -0.18 | -0.03 | -0.22 | -0.18 | -0.18 |
| GaH3   | 2.09 | 0.03 | -0.01 | -0.08 | -0.09 | -0.29 | -0.01 | -0.09 | -0.09 | -0.29 |
| GaO    | 2.07 | 0.00 | -0.09 | -0.09 | -0.31 | -0.31 | -0.09 | -0.28 | -0.31 | -0.31 |
| GeCl4  | 3.02 | 0.02 | -0.05 | -0.05 | -0.29 | -0.29 | -0.06 | -0.33 | -0.29 | -0.29 |
| GeF3   | 3.78 | 0.03 | -0.05 | -0.05 | -0.28 | -0.28 | -0.05 | -0.32 | -0.28 | -0.28 |
| GeF4   | 4.22 | 0.03 | -0.06 | -0.06 | -0.28 | -0.28 | -0.06 | -0.36 | -0.28 | -0.28 |
| GeH4   | 2.49 | 0.03 | -0.02 | -0.09 | -0.12 | -0.34 | -0.02 | -0.12 | -0.12 | -0.34 |
| GeO    | 3.77 | 0.01 | -0.11 | -0.11 | -0.35 | -0.35 | -0.11 | -0.33 | -0.35 | -0.35 |
| GeO2   | 3.73 | 0.03 | -0.10 | -0.10 | -0.45 | -0.45 | -0.10 | -0.42 | -0.45 | -0.45 |
| HBr    | 2.03 | 0.00 | -0.04 | -0.10 | -0.16 | -0.36 | -0.04 | -0.15 | -0.16 | -0.36 |
| HCBBr3 | 2.79 | 0.00 | -0.07 | -0.09 | -0.26 | -0.31 | -0.07 | -0.26 | -0.26 | -0.31 |
| Se8    | 2.45 | 0.00 | -0.12 | -0.12 | -0.47 | -0.47 | -0.12 | -0.43 | -0.47 | -0.47 |
| SeH2   | 2.31 | 0.01 | -0.04 | -0.12 | -0.17 | -0.41 | -0.04 | -0.17 | -0.17 | -0.41 |
| SeO    | 2.44 | 0.01 | -0.08 | -0.08 | -0.37 | -0.37 | -0.08 | -0.33 | -0.37 | -0.37 |
| SeO2   | 3.30 | 0.01 | -0.11 | -0.11 | -0.55 | -0.55 | -0.11 | -0.48 | -0.55 | -0.55 |
| I2     | 1.10 | 0.00 | -0.12 | -0.12 | -0.33 | -0.33 | -0.21 | -0.38 | -0.39 | -0.39 |
| ICl    | 1.24 | 0.00 | -0.10 | -0.10 | -0.35 | -0.35 | -0.13 | -0.37 | -0.39 | -0.39 |
| IH     | 1.72 | 0.00 | -0.04 | -0.10 | -0.18 | -0.35 | -0.07 | -0.19 | -0.21 | -0.38 |
| IO4-   | 3.11 | 0.00 | -0.21 | -0.21 | -1.02 | -1.02 | -0.28 | -0.95 | -1.15 | -1.15 |
| InCl   | 2.41 | 0.00 | -0.07 | -0.08 | -0.28 | -0.28 | -0.01 | -0.19 | -0.23 | -0.23 |
| InCl3  | 2.67 | 0.00 | -0.07 | -0.07 | -0.20 | -0.20 | 0.19  | -0.09 | -0.11 | -0.11 |
| InH    | 1.29 | 0.00 | -0.02 | -0.08 | -0.10 | -0.22 | 0.00  | -0.08 | -0.10 | -0.22 |
| InH3   | 1.77 | 0.00 | -0.01 | -0.09 | -0.06 | -0.25 | 0.07  | -0.04 | -0.06 | -0.24 |
| InO    | 1.71 | 0.00 | -0.11 | -0.11 | -0.41 | -0.41 | 0.11  | -0.14 | -0.24 | -0.24 |
| SbCl6- | 2.88 | 0.00 | -0.14 | -0.14 | -0.43 | -0.43 | -0.08 | -0.45 | -0.47 | -0.47 |
| SbF    | 2.11 | 0.00 | -0.11 | -0.11 | -0.35 | -0.35 | -0.05 | -0.29 | -0.37 | -0.37 |
| SbF3   | 3.60 | 0.00 | -0.15 | -0.15 | -0.47 | -0.47 | -0.08 | -0.46 | -0.50 | -0.50 |
| SbH3   | 1.97 | 0.00 | -0.04 | -0.12 | -0.17 | -0.38 | -0.02 | -0.15 | -0.20 | -0.40 |
| SbO2   | 2.47 | 0.00 | -0.15 | -0.15 | -0.59 | -0.59 | -0.12 | -0.52 | -0.65 | -0.65 |
| SnF3   | 3.42 | 0.00 | -0.11 | -0.11 | -0.29 | -0.29 | 0.00  | -0.32 | -0.36 | -0.36 |
| SnH4   | 2.14 | 0.00 | -0.02 | -0.11 | -0.11 | -0.32 | 0.01  | -0.11 | -0.17 | -0.37 |
| SnO    | 3.17 | 0.00 | -0.13 | -0.13 | -0.45 | -0.45 | -0.17 | -0.44 | -0.58 | -0.58 |
| SnO2   | 3.05 | 0.00 | -0.14 | -0.14 | -0.57 | -0.57 | -0.14 | -0.52 | -0.73 | -0.73 |
| TeF3   | 2.75 | 0.00 | -0.17 | -0.17 | -0.53 | -0.53 | -0.10 | -0.44 | -0.53 | -0.53 |
| TeH2   | 1.99 | 0.00 | -0.05 | -0.13 | -0.20 | -0.40 | -0.03 | -0.17 | -0.21 | -0.42 |
| TeO    | 2.20 | 0.00 | -0.11 | -0.11 | -0.47 | -0.47 | -0.09 | -0.41 | -0.53 | -0.53 |
| TeO2   | 3.06 | 0.00 | -0.17 | -0.17 | -0.71 | -0.71 | -0.10 | -0.56 | -0.77 | -0.77 |
| XeF2   | 0.97 | 0.00 | -0.15 | -0.15 | -0.35 | -0.35 | -0.14 | -0.37 | -0.45 | -0.45 |
| XeF4   | 1.18 | 0.00 | -0.18 | -0.18 | -0.36 | -0.36 | -0.19 | -0.50 | -0.52 | -0.52 |
| XeOF4  | 1.20 | 0.00 | -0.20 | -0.20 | -0.39 | -0.39 | -0.22 | -0.68 | -0.68 | -0.68 |
| BiCl6- | 2.63 | 0.00 | -0.12 | -0.13 | -0.43 | -0.43 | -0.01 | -0.40 | -0.44 | -0.44 |
| BiF    | 2.01 | 0.00 | -0.12 | -0.12 | -0.39 | -0.39 | 0.02  | -0.22 | -0.32 | -0.32 |
| BiF3   | 3.41 | 0.00 | -0.15 | -0.15 | -0.51 | -0.51 | 0.01  | -0.33 | -0.39 | -0.39 |
| BiH3   | 1.79 | 0.00 | -0.04 | -0.13 | -0.18 | -0.38 | -0.02 | -0.16 | -0.17 | -0.38 |
| BiO2   | 1.98 | 0.00 | -0.14 | -0.14 | -0.61 | -0.61 | -0.05 | -0.43 | -0.58 | -0.58 |

|          |      |       |       |       |       |       |       |       |       |       |
|----------|------|-------|-------|-------|-------|-------|-------|-------|-------|-------|
| PbF3     | 2.92 | 0.00  | -0.12 | -0.12 | -0.31 | -0.31 | -0.02 | -0.30 | -0.32 | -0.32 |
| PbH4     | 1.82 | 0.00  | -0.03 | -0.12 | -0.10 | -0.32 | 0.06  | -0.06 | -0.08 | -0.28 |
| PbO      | 2.88 | 0.00  | -0.14 | -0.14 | -0.49 | -0.49 | -0.05 | -0.33 | -0.49 | -0.49 |
| PbO2     | 2.58 | 0.00  | -0.16 | -0.16 | -0.61 | -0.61 | -0.13 | -0.55 | -0.69 | -0.69 |
| TlCl     | 2.32 | 0.00  | -0.08 | -0.08 | -0.31 | -0.31 | -0.10 | -0.27 | -0.31 | -0.31 |
| TlCl3    | 2.13 | 0.00  | -0.09 | -0.09 | -0.16 | -0.16 | 0.12  | -0.12 | -0.10 | -0.10 |
| TlH      | 1.21 | 0.00  | -0.03 | -0.09 | -0.11 | -0.23 | -0.03 | -0.10 | -0.12 | -0.23 |
| TlH3     | 1.52 | 0.00  | -0.04 | -0.12 | -0.05 | -0.25 | 0.09  | -0.01 | -0.03 | -0.21 |
| TlO      | 1.51 | 0.00  | -0.11 | -0.11 | -0.43 | -0.43 | -0.02 | -0.24 | -0.31 | -0.31 |
| CoCl3    | 2.31 | 0.00  | -0.13 | -0.12 | -0.27 | -0.25 | -0.10 | -0.30 | -0.25 | -0.25 |
| CoF2     | 3.48 | 0.00  | -0.18 | -0.22 | -0.51 | -0.38 | -0.14 | -0.31 | -0.38 | -0.38 |
| CoF3     | 3.23 | -0.01 | -0.18 | -0.16 | -0.31 | -0.28 | -0.13 | -0.33 | -0.28 | -0.28 |
| CrCO6    | 6.30 | 0.00  | -0.12 | -0.13 | -0.29 | -0.32 | -0.15 | -0.41 | -0.32 | -0.32 |
| CrCl3    | 2.61 | -0.02 | -0.13 | -0.13 | -0.35 | -0.31 | -0.12 | -0.28 | -0.31 | -0.31 |
| CrF3     | 3.71 | -0.03 | -0.16 | -0.16 | -0.33 | -0.29 | -0.15 | -0.32 | -0.29 | -0.29 |
| CrO3     | 4.95 | -0.04 | -0.14 | -0.12 | -0.59 | -0.67 | -0.16 | -0.44 | -0.67 | -0.67 |
| Cu2      | 1.03 | -0.06 | -0.12 | -0.19 | -0.12 | -0.19 | -0.23 | -0.28 | -0.19 | -0.19 |
| Cu2O     | 2.34 | -0.03 | -0.18 | -0.24 | -0.37 | -0.42 | -0.24 | -0.44 | -0.42 | -0.42 |
| Cu2S     | 2.18 | -0.04 | -0.17 | -0.22 | -0.30 | -0.36 | -0.23 | -0.41 | -0.36 | -0.36 |
| CuCN     | 4.28 | 0.00  | -0.11 | -0.10 | -0.22 | -0.23 | -0.07 | -0.31 | -0.23 | -0.23 |
| CuCl     | 2.03 | 0.00  | -0.11 | -0.12 | -0.22 | -0.23 | -0.09 | -0.23 | -0.23 | -0.23 |
| CuF      | 2.32 | -0.01 | -0.13 | -0.14 | -0.27 | -0.28 | -0.11 | -0.24 | -0.28 | -0.28 |
| CuH      | 1.40 | 0.00  | -0.07 | -0.16 | -0.19 | -0.37 | -0.07 | -0.20 | -0.22 | -0.37 |
| FeCO5    | 6.50 | -0.01 | -0.14 | -0.15 | -0.42 | -0.47 | -0.17 | -0.47 | -0.47 | -0.47 |
| FeF2     | 3.74 | -0.01 | -0.15 | -0.17 | -0.43 | -0.42 | -0.17 | -0.33 | -0.42 | -0.42 |
| FeF3     | 3.66 | -0.01 | -0.18 | -0.16 | -0.33 | -0.28 | -0.13 | -0.32 | -0.28 | -0.28 |
| FeO      | 1.40 | -0.02 | -0.13 | -0.15 | -0.45 | -0.49 | -0.15 | -0.37 | -0.49 | -0.49 |
| Ferrocen | 5.00 | -0.01 | -0.09 | -0.14 | -0.20 | -0.34 | -0.10 | -0.28 | -0.22 | -0.34 |
| MnF2     | 3.64 | -0.01 | -0.15 | -0.17 | -0.44 | -0.44 | -0.18 | -0.34 | -0.44 | -0.44 |
| MnO      | 1.40 | -0.02 | -0.12 | -0.14 | -0.44 | -0.48 | -0.14 | -0.37 | -0.48 | -0.48 |
| MnO2     | 2.31 | -0.03 | -0.16 | -0.13 | -0.59 | -0.69 | -0.15 | -0.46 | -0.69 | -0.69 |
| MnO3F    | 0.95 | -0.03 | -0.18 | -0.21 | -0.54 | -0.64 | -0.23 | -0.55 | -0.64 | -0.64 |
| MnO4-    | 5.51 | -0.04 | -0.21 | -0.23 | -1.04 | -1.13 | -0.31 | -0.61 | -1.13 | -1.13 |
| MnS      | 1.27 | -0.01 | -0.13 | -0.17 | -0.54 | -0.55 | -0.18 | -0.39 | -0.55 | -0.55 |
| NiCO4    | 6.72 | -0.02 | -0.14 | -0.16 | -0.46 | -0.50 | -0.19 | -0.47 | -0.50 | -0.50 |
| NiCl2    | 2.66 | -0.03 | -0.13 | -0.14 | -0.37 | -0.35 | -0.14 | -0.32 | -0.35 | -0.35 |
| NiF2     | 3.40 | 0.00  | -0.15 | -0.16 | -0.39 | -0.36 | -0.14 | -0.30 | -0.36 | -0.36 |
| NiF3     | 2.77 | 0.00  | -0.17 | -0.15 | -0.24 | -0.20 | -0.11 | -0.29 | -0.20 | -0.20 |
| NiO      | 0.89 | -0.01 | -0.14 | -0.15 | -0.48 | -0.48 | -0.15 | -0.33 | -0.48 | -0.48 |
| NiS      | 1.23 | -0.01 | -0.18 | -0.24 | -0.72 | -0.72 | -0.29 | -0.47 | -0.72 | -0.72 |
| ScCl3    | 3.89 | -0.01 | -0.04 | -0.08 | -0.25 | -0.39 | -0.19 | -0.36 | -0.39 | -0.39 |
| ScF3     | 5.16 | -0.01 | -0.05 | -0.09 | -0.22 | -0.32 | -0.21 | -0.36 | -0.32 | -0.32 |
| ScH3     | 2.01 | 0.00  | 0.00  | -0.10 | -0.15 | -0.41 | -0.03 | -0.11 | -0.16 | -0.41 |
| ScO      | 3.85 | -0.01 | -0.05 | -0.09 | -0.27 | -0.39 | -0.14 | -0.35 | -0.39 | -0.39 |
| TiCO4    | 5.69 | 0.00  | -0.11 | -0.11 | -0.31 | -0.39 | -0.14 | -0.39 | -0.39 | -0.39 |
| TiCl4    | 3.82 | 0.01  | -0.09 | -0.09 | -0.34 | -0.45 | -0.19 | -0.35 | -0.45 | -0.45 |
| TiF3     | 4.91 | -0.01 | -0.11 | -0.10 | -0.30 | -0.38 | -0.20 | -0.37 | -0.38 | -0.38 |
| TiF4     | 5.17 | 0.00  | -0.09 | -0.08 | -0.26 | -0.36 | -0.21 | -0.36 | -0.36 | -0.36 |
| TiH4     | 2.00 | 0.00  | -0.05 | -0.11 | -0.21 | -0.50 | -0.03 | -0.11 | -0.21 | -0.50 |
| TiO      | 3.78 | -0.01 | -0.07 | -0.08 | -0.35 | -0.49 | -0.15 | -0.37 | -0.49 | -0.49 |
| TiO2     | 5.03 | -0.01 | -0.11 | -0.11 | -0.40 | -0.56 | -0.21 | -0.46 | -0.56 | -0.56 |
| TiS2     | 3.57 | 0.00  | -0.12 | -0.12 | -0.52 | -0.65 | -0.23 | -0.43 | -0.65 | -0.65 |
| VH5      | 1.93 | -0.01 | -0.08 | -0.17 | -0.30 | -0.61 | -0.06 | -0.18 | -0.31 | -0.61 |
| VO       | 2.92 | -0.01 | -0.07 | -0.05 | -0.44 | -0.57 | -0.12 | -0.33 | -0.57 | -0.57 |
| VOF3     | 5.20 | -0.02 | -0.13 | -0.12 | -0.34 | -0.41 | -0.20 | -0.37 | -0.41 | -0.41 |
| ZnCl2    | 2.43 | -0.04 | -0.14 | -0.11 | -0.25 | -0.23 | -0.09 | -0.26 | -0.23 | -0.23 |
| ZnF2     | 3.03 | -0.02 | -0.14 | -0.11 | -0.26 | -0.24 | -0.08 | -0.22 | -0.24 | -0.24 |
| ZnH2     | 1.52 | -0.01 | -0.05 | -0.13 | -0.10 | -0.31 | 0.00  | -0.12 | -0.10 | -0.31 |
| ZnMe2    | 3.44 | -0.01 | -0.06 | -0.12 | -0.13 | -0.32 | -0.04 | -0.17 | -0.13 | -0.32 |
| Ag2      | 0.91 | -0.03 | -0.07 | -0.13 | -0.09 | -0.23 | -0.14 | -0.25 | -0.23 | -0.23 |
| AgCl     | 1.65 | 0.00  | -0.07 | -0.02 | -0.18 | -0.16 | 0.01  | -0.13 | -0.16 | -0.16 |
| CdF2     | 2.44 | 0.00  | -0.11 | -0.03 | -0.21 | -0.10 | 0.04  | -0.03 | -0.10 | -0.10 |
| CdMe2    | 3.31 | 0.00  | -0.04 | -0.08 | -0.12 | -0.30 | 0.00  | -0.13 | -0.11 | -0.30 |
| MoCO6    | 6.32 | 0.00  | -0.10 | -0.11 | -0.25 | -0.32 | -0.10 | -0.41 | -0.32 | -0.32 |
| MoF3     | 4.03 | 0.00  | -0.10 | -0.11 | -0.29 | -0.27 | -0.13 | -0.33 | -0.27 | -0.27 |
| MoH      | 1.11 | 0.00  | -0.02 | -0.09 | -0.11 | -0.28 | 0.03  | -0.08 | -0.10 | -0.28 |
| MoO2     | 4.36 | 0.01  | -0.11 | -0.14 | -0.47 | -1.09 | -0.20 | -1.06 | -1.09 | -1.09 |
| MoO3     | 5.20 | 0.01  | -0.11 | -0.09 | -0.40 | -0.47 | -0.07 | -0.41 | -0.47 | -0.47 |
| NbF3     | 4.74 | 0.01  | -0.08 | -0.10 | -0.24 | -0.26 | -0.16 | -0.34 | -0.26 | -0.26 |
| NbO      | 4.18 | 0.00  | -0.07 | -0.06 | -0.23 | -0.30 | -0.02 | -0.28 | -0.30 | -0.30 |
| NbO2     | 5.20 | 0.00  | -0.12 | -0.19 | -0.46 | -0.92 | -0.34 | -0.96 | -0.92 | -0.92 |
| NbO2F    | 5.62 | 0.01  | -0.10 | -0.09 | -0.30 | -0.36 | -0.08 | -0.36 | -0.36 | -0.36 |
| PdCO4    | 5.86 | 0.00  | -0.07 | -0.02 | -0.19 | -0.28 | 0.00  | -0.36 | -0.28 | -0.28 |
| PdF      | 1.54 | 0.01  | -0.02 | 0.12  | -0.05 | -0.06 | 0.18  | 0.00  | -0.06 | -0.06 |
| PdO2     | 0.69 | 0.02  | -0.04 | 0.10  | -0.25 | -0.09 | 0.19  | -0.11 | -0.09 | -0.09 |



|        |      |       |       |       |       |       |       |       |       |       |
|--------|------|-------|-------|-------|-------|-------|-------|-------|-------|-------|
| RhF    | 1.99 | -0.01 | -0.10 | -0.11 | -0.19 | -0.27 | -0.08 | -0.22 | -0.27 | -0.27 |
| RhF4   | 2.58 | 0.00  | -0.13 | -0.06 | -0.24 | -0.20 | -0.01 | -0.21 | -0.20 | -0.20 |
| RhF6   | 2.62 | 0.00  | -0.11 | -0.09 | -0.25 | -0.27 | -0.10 | -0.36 | -0.27 | -0.27 |
| RhO    | 2.34 | -0.01 | -0.10 | -0.19 | -0.54 | -0.70 | -0.21 | -0.59 | -0.70 | -0.70 |
| RuCO5  | 6.37 | 0.00  | -0.10 | -0.08 | -0.25 | -0.33 | -0.06 | -0.42 | -0.33 | -0.33 |
| RuF    | 2.03 | -0.02 | -0.12 | -0.20 | -0.39 | -0.41 | -0.18 | -0.36 | -0.41 | -0.41 |
| RuO    | 1.85 | 0.01  | -0.05 | 0.03  | -0.24 | -0.32 | 0.08  | -0.26 | -0.32 | -0.32 |
| RuO2   | 4.16 | 0.00  | -0.11 | -0.11 | -0.46 | -0.54 | -0.10 | -0.48 | -0.54 | -0.54 |
| RuO4   | 5.18 | 0.01  | -0.10 | -0.03 | -0.40 | -0.49 | 0.00  | -0.40 | -0.49 | -0.49 |
| Tc2O7  | 5.56 | 0.01  | -0.11 | -0.11 | -0.45 | -0.54 | -0.09 | -0.46 | -0.54 | -0.54 |
| TcO    | 2.19 | 0.01  | -0.09 | -0.12 | -0.40 | -0.51 | -0.10 | -0.44 | -0.51 | -0.51 |
| TcO3F  | 5.22 | 0.01  | -0.11 | -0.11 | -0.43 | -0.52 | -0.11 | -0.46 | -0.52 | -0.52 |
| YF     | 3.73 | 0.00  | -0.05 | -0.03 | -0.11 | -0.11 | -0.09 | -0.15 | -0.11 | -0.11 |
| YF3    | 5.28 | -0.02 | -0.12 | -0.14 | -0.17 | -0.31 | -0.18 | -0.39 | -0.31 | -0.31 |
| YO     | 4.00 | 0.00  | -0.10 | -0.13 | -0.23 | -0.36 | -0.06 | -0.38 | -0.36 | -0.36 |
| ZrF    | 3.29 | -0.01 | -0.07 | -0.12 | -0.18 | -0.32 | -0.14 | -0.39 | -0.32 | -0.32 |
| ZrF3   | 5.30 | 0.00  | -0.09 | -0.12 | -0.19 | -0.29 | -0.17 | -0.38 | -0.29 | -0.29 |
| ZrO    | 4.26 | -0.01 | -0.09 | -0.11 | -0.24 | -0.40 | -0.06 | -0.39 | -0.40 | -0.40 |
| ZrO2   | 5.33 | -0.01 | -0.12 | -0.15 | -0.35 | -0.53 | -0.12 | -0.51 | -0.53 | -0.53 |
| Au2    | 1.26 | -0.05 | -0.10 | -0.17 | -0.20 | -0.41 | -0.26 | -0.43 | -0.41 | -0.41 |
| Au3-   | 2.61 | -0.08 | -0.17 | -0.30 | -0.33 | -0.77 | -0.49 | -0.80 | -0.77 | -0.77 |
| AuCl   | 1.49 | -0.01 | -0.08 | -0.09 | -0.30 | -0.24 | -0.07 | -0.23 | -0.24 | -0.24 |
| AuCl3  | 2.85 | 0.00  | -0.03 | 0.01  | -0.15 | -0.14 | -0.04 | -0.15 | -0.14 | -0.14 |
| HfF    | 3.54 | 0.00  | -0.05 | -0.03 | -0.13 | -0.15 | -0.08 | -0.18 | -0.15 | -0.15 |
| HfF3   | 5.37 | 0.00  | -0.07 | -0.09 | -0.18 | -0.28 | -0.16 | -0.37 | -0.28 | -0.28 |
| HfO    | 4.68 | 0.01  | -0.07 | -0.03 | -0.24 | -0.27 | -0.03 | -0.19 | -0.27 | -0.27 |
| HfO2   | 5.09 | -0.01 | -0.11 | -0.13 | -0.32 | -0.48 | -0.11 | -0.47 | -0.48 | -0.48 |
| Hg2Cl2 | 1.23 | -0.04 | -0.11 | -0.11 | -0.34 | -0.15 | -0.13 | -0.18 | -0.15 | -0.15 |
| HgF2   | 1.86 | -0.01 | -0.12 | -0.10 | -0.37 | -0.12 | -0.05 | -0.07 | -0.12 | -0.12 |
| HgMe2  | 3.27 | 0.00  | -0.05 | -0.10 | -0.17 | -0.33 | -0.03 | -0.15 | -0.14 | -0.33 |
| IrF6   | 3.19 | 0.00  | -0.08 | -0.09 | -0.34 | -0.38 | -0.20 | -0.45 | -0.38 | -0.38 |
| OsCO5  | 6.44 | 0.00  | -0.08 | -0.09 | -0.30 | -0.41 | -0.14 | -0.50 | -0.41 | -0.41 |
| OsO2   | 4.28 | 0.00  | -0.09 | -0.09 | -0.48 | -0.64 | -0.15 | -0.57 | -0.64 | -0.64 |
| OsO3   | 5.18 | 0.01  | -0.11 | -0.08 | -0.49 | -0.63 | -0.16 | -0.54 | -0.63 | -0.63 |
| OsO4   | 5.43 | 0.01  | -0.10 | -0.07 | -0.50 | -0.65 | -0.17 | -0.56 | -0.65 | -0.65 |
| OsOF5  | 3.39 | 0.01  | -0.08 | -0.09 | -0.38 | -0.54 | -0.25 | -0.58 | -0.54 | -0.54 |
| PtCO4  | 6.14 | 0.00  | -0.10 | -0.09 | -0.30 | -0.38 | -0.11 | -0.46 | -0.38 | -0.38 |
| PtO    | 2.14 | -0.01 | -0.10 | -0.16 | -0.41 | -0.67 | -0.20 | -0.62 | -0.67 | -0.67 |
| PtO2   | 3.91 | 0.01  | -0.11 | -0.03 | -0.40 | -0.51 | -0.07 | -0.41 | -0.51 | -0.51 |
| ReH    | 0.78 | 0.00  | -0.01 | -0.08 | -0.10 | -0.31 | 0.02  | -0.08 | -0.09 | -0.31 |
| ReO    | 2.55 | 0.01  | -0.10 | -0.12 | -0.55 | -0.74 | -0.31 | -0.69 | -0.74 | -0.74 |
| ReO2   | 3.85 | 0.02  | -0.09 | -0.06 | -0.40 | -0.57 | -0.14 | -0.55 | -0.57 | -0.57 |
| ReO3   | 4.57 | 0.01  | -0.10 | -0.11 | -0.43 | -0.72 | -0.18 | -0.67 | -0.72 | -0.72 |
| ReO3F  | 5.42 | 0.01  | -0.10 | -0.09 | -0.45 | -0.60 | -0.19 | -0.55 | -0.60 | -0.60 |
| TaF    | 2.64 | 0.01  | -0.02 | 0.03  | -0.06 | 0.01  | 0.05  | -0.03 | 0.01  | 0.01  |
| TaF3   | 5.08 | 0.01  | -0.08 | -0.10 | -0.25 | -0.37 | -0.21 | -0.44 | -0.37 | -0.37 |
| TaO2F  | 5.63 | 0.01  | -0.09 | -0.10 | -0.34 | -0.48 | -0.16 | -0.47 | -0.48 | -0.48 |
| WCO6   | 6.45 | 0.00  | -0.09 | -0.10 | -0.27 | -0.38 | -0.14 | -0.46 | -0.38 | -0.38 |
| WF3    | 4.38 | 0.01  | -0.09 | -0.12 | -0.32 | -0.34 | -0.19 | -0.39 | -0.34 | -0.34 |
| WH     | 1.33 | 0.01  | -0.03 | -0.09 | -0.14 | -0.32 | -0.02 | -0.11 | -0.13 | -0.32 |
| WO     | 1.90 | -0.03 | -0.14 | -0.36 | -0.41 | -0.86 | -0.44 | -0.81 | -0.86 | -0.86 |
| WO2    | 5.10 | 0.01  | -0.12 | -0.10 | -0.45 | -0.57 | -0.20 | -0.46 | -0.57 | -0.57 |
| WO3    | 5.36 | 0.01  | -0.12 | -0.10 | -0.50 | -0.63 | -0.22 | -0.55 | -0.63 | -0.63 |

!

!

!

=====

! atomization energies per atom /eV: HF

=====

!

!

! compound QZVPP

!

!

BaF 2.21 -0.03 -0.07 -0.07 -0.18 -0.18 -0.22 -0.24 -0.18 -0.18

BaF2 2.82 -0.03 -0.08 -0.08 -0.19 -0.19 -0.22 -0.25 -0.19 -0.19

BaH2 1.09 -0.01 -0.04 -0.07 -0.13 -0.15 -0.09 -0.12 -0.13 -0.15

BaO 0.93 -0.04 -0.13 -0.13 -0.44 -0.44 -0.39 -0.47 -0.44 -0.44

BaS 1.17 -0.02 -0.07 -0.07 -0.18 -0.18 -0.17 -0.21 -0.18 -0.18

Be2F4 3.70 0.00 -0.11 -0.11 -0.09 -0.09 -0.17 -0.25 -0.09 -0.09

Be2H4 1.99 0.00 -0.03 -0.03 -0.02 -0.09 -0.04 -0.07 -0.02 -0.09

Be4 0.45 0.00 -0.03 -0.03 0.01 0.01 -0.09 -0.09 0.01 0.01

BeC2H6 2.87 0.00 -0.01 -0.02 0.02 0.02 -0.03 -0.01 -0.02 -0.03

BeF2O2H4 2.80 0.00 -0.03 -0.05 -0.02 -0.15 -0.06 -0.10 -0.02 -0.15

BeH2 1.81 0.00 -0.02 -0.02 0.01 -0.05 -0.02 -0.03 0.01 -0.05

|          |       |       |       |       |       |       |       |       |       |       |
|----------|-------|-------|-------|-------|-------|-------|-------|-------|-------|-------|
| BeS      | 0.81  | 0.00  | -0.04 | -0.04 | -0.04 | -0.04 | -0.08 | -0.13 | -0.04 | -0.04 |
| CaCl2    | 2.53  | 0.00  | -0.05 | -0.05 | 0.00  | 0.00  | -0.05 | -0.08 | 0.00  | 0.00  |
| CaF2     | 2.76  | 0.00  | -0.07 | -0.07 | -0.06 | -0.06 | -0.07 | -0.09 | -0.06 | -0.06 |
| CaH2     | 1.12  | 0.00  | -0.02 | -0.03 | -0.04 | -0.06 | -0.02 | -0.04 | -0.04 | -0.06 |
| CsF      | 1.56  | -0.02 | -0.04 | -0.06 | -0.18 | -0.18 | -0.13 | -0.28 | -0.63 | -0.63 |
| CsH      | 0.44  | -0.01 | -0.02 | -0.04 | -0.08 | -0.08 | -0.09 | -0.21 | -0.24 | -0.25 |
| CsO      | 0.47  | -0.02 | -0.05 | -0.06 | -0.18 | -0.18 | -0.16 | -0.25 | -0.56 | -0.56 |
| K2S      | 0.81  | 0.00  | -0.03 | -0.03 | -0.06 | -0.06 | -0.14 | -0.23 | -0.31 | -0.31 |
| K3P      | 0.07  | 0.00  | -0.02 | -0.03 | -0.04 | -0.04 | -0.09 | -0.18 | -0.19 | -0.19 |
| KBr      | 1.51  | 0.00  | -0.01 | -0.01 | -0.04 | -0.04 | -0.06 | -0.11 | -0.16 | -0.16 |
| KCl      | 1.62  | 0.00  | -0.03 | -0.03 | -0.08 | -0.08 | -0.10 | -0.15 | -0.28 | -0.28 |
| KF       | 1.52  | 0.00  | -0.05 | -0.05 | -0.15 | -0.15 | -0.14 | -0.22 | -0.48 | -0.48 |
| KH       | 0.43  | 0.00  | -0.02 | -0.02 | -0.04 | -0.05 | -0.06 | -0.13 | -0.13 | -0.14 |
| KI       | 1.32  | 0.00  | -0.01 | -0.01 | -0.01 | -0.01 | -0.08 | -0.10 | -0.10 | -0.10 |
| Li2      | 0.09  | 0.00  | -0.01 | -0.01 | 0.00  | 0.00  | -0.01 | -0.01 | -0.01 | -0.01 |
| Li2O     | 1.19  | 0.00  | -0.03 | -0.04 | 0.01  | 0.01  | -0.04 | -0.13 | -0.11 | -0.11 |
| Li4C4H12 | 2.51  | 0.00  | -0.01 | -0.02 | 0.03  | -0.01 | -0.01 | -0.02 | 0.02  | -0.02 |
| Li4Cl4   | 2.54  | 0.00  | -0.02 | -0.03 | 0.13  | 0.13  | -0.03 | -0.05 | 0.10  | 0.10  |
| Li4H4    | 1.48  | 0.00  | -0.02 | -0.04 | 0.00  | -0.02 | -0.02 | -0.05 | -0.02 | -0.04 |
| Li8      | 0.24  | 0.00  | -0.01 | -0.02 | -0.01 | -0.01 | -0.02 | -0.03 | -0.03 | -0.03 |
| LiBH4    | 2.29  | 0.00  | -0.01 | -0.02 | 0.02  | -0.01 | -0.01 | -0.02 | 0.01  | -0.02 |
| LiCl     | 1.81  | 0.00  | -0.02 | -0.03 | -0.02 | -0.02 | -0.03 | -0.08 | -0.07 | -0.07 |
| LiF      | 1.95  | 0.00  | -0.03 | -0.05 | -0.05 | -0.05 | -0.05 | -0.13 | -0.12 | -0.12 |
| LiH      | 0.74  | 0.00  | -0.01 | -0.02 | 0.00  | -0.02 | -0.01 | -0.03 | -0.02 | -0.03 |
| LiSLi    | 1.34  | 0.00  | -0.02 | -0.03 | -0.02 | -0.02 | -0.03 | -0.08 | -0.13 | -0.13 |
| Mg4      | -0.07 | 0.00  | -0.01 | -0.01 | 0.00  | 0.00  | -0.06 | -0.14 | -0.16 | -0.16 |
| MgCl2    | 2.19  | 0.00  | -0.02 | -0.02 | 0.02  | 0.02  | -0.13 | -0.23 | -0.25 | -0.25 |
| MgF      | 1.73  | 0.00  | -0.05 | -0.05 | -0.02 | -0.02 | -0.15 | -0.32 | -0.40 | -0.40 |
| MgF2     | 2.55  | 0.00  | -0.05 | -0.05 | 0.00  | 0.00  | -0.19 | -0.27 | -0.30 | -0.30 |
| MgH2     | 1.14  | 0.00  | -0.01 | -0.01 | -0.01 | -0.04 | -0.02 | -0.07 | -0.06 | -0.11 |
| Na2O     | 0.28  | -0.01 | -0.01 | -0.01 | 0.01  | 0.01  | -0.10 | -0.11 | -0.16 | -0.16 |
| Na2S     | 0.85  | -0.01 | 0.00  | 0.00  | 0.01  | 0.01  | -0.05 | -0.06 | -0.06 | -0.06 |
| Na3N     | -0.45 | -0.01 | 0.00  | 0.00  | -0.01 | -0.01 | -0.04 | -0.07 | -0.06 | -0.06 |
| Na3P     | 0.22  | 0.00  | 0.00  | 0.00  | 0.00  | 0.00  | -0.03 | -0.07 | -0.04 | -0.04 |
| NaCl     | 1.52  | 0.00  | -0.01 | -0.01 | -0.01 | -0.01 | -0.05 | -0.07 | -0.10 | -0.10 |
| NaF      | 1.45  | -0.01 | -0.01 | -0.01 | -0.06 | -0.06 | -0.08 | -0.09 | -0.22 | -0.22 |
| NaH      | 0.46  | 0.00  | 0.00  | 0.00  | -0.02 | -0.03 | -0.01 | -0.04 | -0.03 | -0.05 |
| PLi3     | 0.66  | 0.00  | -0.02 | -0.03 | -0.02 | -0.02 | -0.03 | -0.09 | -0.08 | -0.08 |
| RbF      | 1.47  | -0.01 | -0.04 | -0.04 | -0.16 | -0.16 | -0.13 | -0.20 | -0.50 | -0.50 |
| RbH      | 0.39  | 0.00  | -0.01 | -0.02 | -0.04 | -0.04 | -0.06 | -0.13 | -0.15 | -0.16 |
| RbO      | 0.39  | -0.01 | -0.04 | -0.04 | -0.17 | -0.17 | -0.14 | -0.20 | -0.47 | -0.47 |
| SrF      | 2.07  | -0.03 | -0.06 | -0.09 | -0.09 | -0.09 | -0.15 | -0.17 | -0.09 | -0.09 |
| SrF2     | 2.70  | -0.03 | -0.07 | -0.10 | -0.09 | -0.09 | -0.15 | -0.17 | -0.09 | -0.09 |
| SrH2     | 1.01  | -0.01 | -0.02 | -0.05 | -0.06 | -0.08 | -0.04 | -0.05 | -0.06 | -0.08 |
| SrO      | 0.31  | -0.03 | -0.08 | -0.13 | -0.24 | -0.24 | -0.23 | -0.27 | -0.24 | -0.24 |
| SrS      | 0.76  | -0.01 | -0.03 | -0.05 | -0.05 | -0.05 | -0.09 | -0.10 | -0.05 | -0.05 |
| B2H6     | 2.63  | 0.00  | 0.00  | -0.01 | 0.03  | -0.01 | 0.00  | -0.01 | 0.03  | -0.01 |
| B3N3H6   | 3.28  | 0.00  | -0.01 | -0.01 | 0.06  | 0.00  | -0.01 | -0.04 | 0.06  | 0.00  |
| B4H4     | 2.83  | 0.00  | 0.00  | 0.00  | 0.07  | 0.04  | 0.00  | -0.01 | 0.07  | 0.04  |
| BF3      | 3.92  | 0.00  | -0.01 | -0.01 | 0.04  | 0.04  | -0.01 | -0.07 | 0.04  | 0.04  |
| BH3      | 2.51  | 0.00  | 0.00  | -0.01 | 0.02  | -0.02 | 0.00  | 0.00  | 0.02  | -0.02 |
| BH3CO    | 2.96  | 0.00  | 0.00  | -0.01 | 0.03  | 0.01  | 0.00  | -0.04 | 0.03  | 0.01  |
| BH3NH3   | 2.45  | 0.00  | 0.00  | -0.01 | 0.02  | -0.06 | 0.00  | -0.02 | 0.02  | -0.06 |
| C2H2     | 3.16  | 0.00  | 0.00  | -0.01 | 0.04  | 0.00  | 0.00  | -0.02 | 0.04  | 0.00  |
| C2H3N    | 2.46  | 0.00  | -0.01 | -0.01 | 0.03  | -0.03 | -0.01 | -0.05 | 0.03  | -0.03 |
| C2H4     | 3.09  | 0.00  | 0.00  | -0.01 | 0.04  | -0.02 | 0.00  | -0.01 | 0.04  | -0.02 |
| C2H6     | 2.98  | 0.00  | 0.00  | -0.01 | 0.04  | -0.02 | 0.00  | -0.01 | 0.04  | -0.02 |
| C4H4     | 3.01  | 0.00  | 0.00  | -0.01 | 0.09  | 0.05  | 0.00  | -0.03 | 0.09  | 0.05  |
| C6H6     | 3.69  | 0.00  | 0.00  | -0.01 | 0.08  | 0.04  | 0.00  | -0.02 | 0.08  | 0.04  |
| CF4      | 2.70  | 0.00  | -0.01 | -0.01 | 0.06  | 0.06  | -0.01 | -0.10 | 0.06  | 0.06  |
| CH2O     | 2.77  | 0.00  | -0.01 | -0.01 | 0.03  | -0.01 | -0.01 | -0.04 | 0.03  | -0.01 |
| CH2O2    | 1.97  | 0.00  | 0.00  | -0.01 | 0.01  | -0.03 | 0.00  | -0.06 | 0.01  | -0.03 |
| CH3N     | 2.59  | 0.00  | -0.01 | -0.01 | 0.01  | -0.05 | -0.01 | -0.04 | 0.01  | -0.05 |
| CH3OH    | 2.66  | 0.00  | 0.00  | -0.02 | 0.02  | -0.07 | 0.00  | -0.03 | 0.02  | -0.07 |
| CH4      | 2.84  | 0.00  | 0.00  | -0.01 | 0.02  | -0.04 | 0.00  | -0.01 | 0.02  | -0.04 |
| CO       | 3.75  | 0.00  | -0.01 | -0.01 | 0.04  | 0.04  | -0.01 | -0.08 | 0.04  | 0.04  |
| CO2      | 3.53  | 0.00  | -0.01 | -0.01 | 0.05  | 0.05  | -0.01 | -0.12 | 0.05  | 0.05  |
| F2       | -0.81 | 0.00  | 0.00  | 0.00  | -0.02 | -0.02 | 0.00  | -0.02 | -0.02 | -0.02 |
| H2       | 1.81  | 0.00  | 0.00  | -0.01 | -0.04 | -0.10 | 0.00  | -0.01 | -0.04 | -0.10 |
| H2CO3    | 2.86  | 0.00  | -0.01 | -0.02 | 0.05  | -0.06 | -0.01 | -0.08 | 0.05  | -0.06 |
| H2O      | 2.23  | 0.00  | -0.01 | -0.04 | -0.05 | -0.25 | -0.01 | -0.05 | -0.05 | -0.25 |
| H2O2     | 1.44  | 0.00  | 0.00  | -0.02 | -0.02 | -0.16 | 0.00  | -0.04 | -0.02 | -0.16 |
| HCN      | 2.85  | 0.00  | -0.01 | -0.01 | 0.02  | -0.01 | -0.01 | -0.05 | 0.02  | -0.01 |
| HF       | 2.09  | 0.00  | -0.01 | -0.03 | -0.07 | -0.28 | -0.01 | -0.04 | -0.07 | -0.28 |
| HNC      | 2.71  | 0.00  | -0.01 | -0.01 | 0.03  | -0.04 | -0.01 | -0.05 | 0.03  | -0.04 |

|        |       |      |       |       |       |       |       |       |       |       |
|--------|-------|------|-------|-------|-------|-------|-------|-------|-------|-------|
| HNO    | 1.12  | 0.00 | -0.01 | -0.02 | -0.01 | -0.06 | -0.01 | -0.09 | -0.01 | -0.06 |
| HNO2   | 1.19  | 0.00 | -0.01 | -0.02 | -0.02 | -0.06 | -0.01 | -0.12 | -0.02 | -0.06 |
| HNO3   | 1.18  | 0.00 | -0.01 | -0.02 | -0.02 | -0.08 | -0.01 | -0.13 | -0.02 | -0.08 |
| N2     | 2.45  | 0.00 | -0.01 | -0.01 | -0.05 | -0.05 | -0.01 | -0.13 | -0.05 | -0.05 |
| N2H2   | 1.55  | 0.00 | -0.01 | -0.02 | -0.03 | -0.11 | -0.01 | -0.09 | -0.03 | -0.11 |
| N2H4   | 1.92  | 0.00 | -0.01 | -0.02 | -0.02 | -0.12 | -0.01 | -0.05 | -0.02 | -0.12 |
| N4     | -0.02 | 0.00 | -0.02 | -0.02 | -0.15 | -0.15 | -0.02 | -0.17 | -0.15 | -0.15 |
| NF3    | 0.36  | 0.00 | -0.01 | -0.01 | -0.06 | -0.06 | -0.01 | -0.10 | -0.06 | -0.06 |
| NH3    | 2.16  | 0.00 | -0.01 | -0.03 | -0.03 | -0.16 | -0.01 | -0.04 | -0.03 | -0.16 |
| NH4F   | 2.21  | 0.00 | -0.01 | -0.02 | -0.03 | -0.17 | -0.01 | -0.03 | -0.03 | -0.17 |
| OF2    | -0.63 | 0.00 | 0.00  | 0.00  | -0.06 | -0.06 | 0.00  | -0.05 | -0.06 | -0.06 |
| Al2O3  | 2.19  | 0.00 | -0.02 | -0.02 | -0.10 | -0.10 | -0.07 | -0.17 | -0.10 | -0.10 |
| Al2S3  | 1.97  | 0.00 | 0.00  | 0.00  | -0.02 | -0.02 | -0.03 | -0.09 | -0.02 | -0.02 |
| AlCl3  | 2.64  | 0.00 | 0.00  | -0.01 | -0.01 | -0.01 | -0.03 | -0.09 | -0.01 | -0.01 |
| AlF3   | 3.47  | 0.00 | -0.03 | -0.03 | -0.09 | -0.09 | -0.07 | -0.20 | -0.09 | -0.09 |
| AlH3   | 1.83  | 0.00 | -0.01 | -0.01 | 0.00  | -0.03 | -0.02 | -0.02 | 0.00  | -0.03 |
| AlN    | 0.30  | 0.00 | -0.02 | -0.02 | -0.10 | -0.10 | -0.03 | -0.11 | -0.10 | -0.10 |
| CS2    | 2.36  | 0.00 | 0.00  | 0.00  | -0.03 | -0.03 | -0.04 | -0.15 | -0.03 | -0.03 |
| Cl2    | 0.38  | 0.00 | -0.01 | -0.01 | -0.11 | -0.11 | -0.04 | -0.12 | -0.11 | -0.11 |
| ClF    | 0.13  | 0.00 | -0.02 | -0.02 | -0.11 | -0.11 | -0.04 | -0.12 | -0.11 | -0.11 |
| ClF3   | -0.36 | 0.00 | -0.03 | -0.03 | -0.27 | -0.27 | -0.07 | -0.25 | -0.27 | -0.27 |
| H2SO4  | 1.90  | 0.00 | -0.02 | -0.03 | -0.30 | -0.38 | -0.09 | -0.35 | -0.30 | -0.38 |
| H3PO4  | 2.58  | 0.00 | -0.01 | -0.03 | -0.18 | -0.30 | -0.06 | -0.24 | -0.18 | -0.30 |
| HCP    | 2.22  | 0.00 | -0.01 | -0.01 | -0.03 | -0.06 | -0.03 | -0.10 | -0.03 | -0.06 |
| HCl    | 1.66  | 0.00 | 0.00  | -0.02 | -0.04 | -0.17 | -0.02 | -0.04 | -0.04 | -0.17 |
| HSH    | 1.86  | 0.00 | 0.00  | -0.01 | -0.04 | -0.15 | -0.02 | -0.05 | -0.04 | -0.15 |
| HSSH   | 1.67  | 0.00 | 0.00  | -0.01 | -0.08 | -0.16 | -0.03 | -0.09 | -0.08 | -0.16 |
| P2     | 0.81  | 0.00 | -0.01 | -0.01 | -0.14 | -0.14 | -0.05 | -0.20 | -0.14 | -0.14 |
| PF3    | 2.49  | 0.00 | -0.03 | -0.03 | -0.25 | -0.25 | -0.07 | -0.31 | -0.25 | -0.25 |
| PF5    | 2.56  | 0.00 | -0.02 | -0.03 | -0.25 | -0.25 | -0.08 | -0.35 | -0.25 | -0.25 |
| PH3    | 1.86  | 0.00 | 0.00  | -0.01 | -0.04 | -0.11 | -0.02 | -0.06 | -0.04 | -0.11 |
| S2     | 1.08  | 0.00 | -0.02 | -0.02 | -0.18 | -0.18 | -0.06 | -0.22 | -0.18 | -0.18 |
| S5     | 0.92  | 0.00 | -0.01 | -0.01 | -0.20 | -0.20 | -0.06 | -0.21 | -0.20 | -0.20 |
| SF2    | 1.09  | 0.00 | -0.03 | -0.03 | -0.21 | -0.21 | -0.06 | -0.23 | -0.21 | -0.21 |
| SF4    | 1.24  | 0.00 | -0.03 | -0.03 | -0.29 | -0.29 | -0.08 | -0.33 | -0.29 | -0.29 |
| SF6    | 1.38  | 0.00 | -0.02 | -0.02 | -0.27 | -0.27 | -0.09 | -0.38 | -0.27 | -0.27 |
| SiCl4  | 2.46  | 0.00 | -0.01 | -0.01 | -0.08 | -0.08 | -0.04 | -0.15 | -0.08 | -0.08 |
| SiF4   | 3.68  | 0.00 | -0.03 | -0.03 | -0.22 | -0.22 | -0.08 | -0.31 | -0.22 | -0.22 |
| SiH4   | 2.22  | 0.00 | 0.00  | -0.01 | -0.03 | -0.07 | -0.02 | -0.05 | -0.03 | -0.07 |
| SiO2   | 2.19  | 0.00 | -0.02 | -0.02 | -0.23 | -0.23 | -0.08 | -0.27 | -0.23 | -0.23 |
| SiS2   | 1.96  | 0.00 | 0.00  | 0.00  | -0.11 | -0.11 | -0.04 | -0.17 | -0.11 | -0.11 |
| As4    | 0.74  | 0.00 | 0.01  | 0.01  | -0.08 | -0.08 | 0.01  | -0.09 | -0.08 | -0.08 |
| As4S4  | 0.70  | 0.00 | 0.00  | 0.00  | -0.08 | -0.08 | -0.01 | -0.13 | -0.08 | -0.08 |
| AsCl3  | 1.34  | 0.00 | -0.01 | -0.01 | -0.11 | -0.11 | -0.02 | -0.13 | -0.11 | -0.11 |
| AsCl6- | 1.41  | 0.00 | -0.01 | -0.01 | -0.08 | -0.08 | -0.02 | -0.09 | -0.08 | -0.08 |
| AsH3   | 1.61  | 0.00 | 0.00  | -0.01 | -0.01 | -0.07 | 0.00  | -0.02 | -0.01 | -0.07 |
| Br2    | 0.33  | 0.00 | -0.01 | -0.01 | -0.06 | -0.06 | -0.01 | -0.05 | -0.06 | -0.06 |
| BrCl   | 0.36  | 0.00 | -0.02 | -0.02 | -0.08 | -0.08 | -0.02 | -0.08 | -0.08 | -0.08 |
| BrO4-  | 0.23  | 0.00 | -0.04 | -0.04 | -0.40 | -0.40 | -0.04 | -0.34 | -0.40 | -0.40 |
| GaCl   | 1.81  | 0.00 | 0.00  | 0.00  | -0.01 | -0.01 | 0.00  | -0.02 | -0.01 | -0.01 |
| GaCl3  | 2.15  | 0.00 | 0.00  | 0.01  | 0.01  | 0.01  | 0.00  | -0.05 | 0.01  | 0.01  |
| GaF    | 2.12  | 0.00 | -0.01 | -0.01 | -0.03 | -0.03 | -0.01 | -0.07 | -0.03 | -0.03 |
| GaF2   | 2.13  | 0.00 | -0.02 | -0.02 | -0.04 | -0.04 | -0.02 | -0.11 | -0.04 | -0.04 |
| GaH3   | 1.64  | 0.00 | 0.00  | -0.01 | 0.00  | -0.03 | 0.00  | -0.01 | 0.00  | -0.03 |
| GaO    | 0.84  | 0.00 | -0.01 | -0.01 | -0.07 | -0.07 | -0.01 | -0.09 | -0.07 | -0.07 |
| GeCl4  | 2.03  | 0.00 | 0.00  | 0.00  | -0.04 | -0.04 | -0.01 | -0.10 | -0.04 | -0.04 |
| GeF3   | 2.38  | 0.00 | -0.02 | -0.02 | -0.11 | -0.11 | -0.02 | -0.17 | -0.11 | -0.11 |
| GeF4   | 2.72  | 0.00 | -0.02 | -0.02 | -0.12 | -0.12 | -0.02 | -0.20 | -0.12 | -0.12 |
| GeH4   | 1.95  | 0.00 | 0.00  | 0.00  | 0.00  | -0.05 | 0.00  | -0.01 | 0.00  | -0.05 |
| GeO    | 1.56  | 0.00 | -0.02 | -0.02 | -0.11 | -0.11 | -0.02 | -0.12 | -0.11 | -0.11 |
| GeO2   | 1.19  | 0.00 | -0.01 | -0.01 | -0.16 | -0.16 | -0.01 | -0.18 | -0.16 | -0.16 |
| HBr    | 1.41  | 0.00 | 0.00  | -0.01 | 0.00  | -0.11 | 0.00  | -0.01 | 0.00  | -0.11 |
| HBr3   | 1.62  | 0.00 | 0.00  | 0.00  | -0.01 | -0.02 | 0.00  | -0.03 | -0.01 | -0.02 |
| Se8    | 0.86  | 0.00 | -0.01 | -0.01 | -0.08 | -0.08 | -0.01 | -0.07 | -0.08 | -0.08 |
| SeH2   | 1.60  | 0.00 | 0.00  | -0.01 | 0.00  | -0.09 | 0.00  | -0.01 | 0.00  | -0.09 |
| SeO    | 0.62  | 0.00 | -0.02 | -0.02 | -0.18 | -0.18 | -0.02 | -0.16 | -0.18 | -0.18 |
| SeO2   | 0.59  | 0.00 | -0.03 | -0.03 | -0.26 | -0.26 | -0.03 | -0.26 | -0.26 | -0.26 |
| I2     | 0.30  | 0.00 | -0.02 | -0.02 | -0.08 | -0.08 | -0.04 | -0.08 | -0.08 | -0.08 |
| ICl    | 0.39  | 0.00 | -0.02 | -0.02 | -0.09 | -0.09 | -0.05 | -0.12 | -0.11 | -0.11 |
| IH     | 1.14  | 0.00 | 0.00  | -0.01 | -0.02 | -0.09 | -0.01 | -0.02 | -0.03 | -0.11 |
| IO4-   | 0.33  | 0.00 | -0.08 | -0.08 | -0.52 | -0.52 | -0.18 | -0.56 | -0.62 | -0.62 |
| InCl   | 1.71  | 0.00 | -0.01 | -0.01 | -0.04 | -0.04 | 0.08  | 0.04  | 0.02  | 0.02  |
| InCl3  | 1.90  | 0.00 | -0.01 | -0.01 | -0.04 | -0.04 | 0.18  | 0.07  | 0.08  | 0.08  |
| InH    | 0.92  | 0.00 | 0.00  | 0.00  | -0.02 | -0.03 | 0.02  | 0.01  | -0.01 | -0.03 |
| InH3   | 1.39  | 0.00 | 0.00  | -0.01 | -0.03 | -0.06 | 0.05  | 0.02  | 0.00  | -0.03 |

|          |       |       |       |       |       |       |       |       |       |       |
|----------|-------|-------|-------|-------|-------|-------|-------|-------|-------|-------|
| InO      | 0.57  | 0.00  | -0.02 | -0.02 | -0.15 | -0.15 | 0.26  | 0.14  | 0.07  | 0.07  |
| SbCl6-   | 1.69  | 0.00  | -0.03 | -0.03 | -0.08 | -0.08 | -0.01 | -0.12 | -0.07 | -0.07 |
| SbF      | 1.10  | 0.00  | -0.04 | -0.04 | -0.19 | -0.19 | -0.02 | -0.16 | -0.19 | -0.19 |
| SbF3     | 2.01  | 0.00  | -0.06 | -0.06 | -0.24 | -0.24 | -0.04 | -0.28 | -0.25 | -0.25 |
| SbH3     | 1.38  | 0.00  | -0.01 | -0.01 | -0.04 | -0.09 | 0.02  | 0.00  | -0.03 | -0.08 |
| SbO2     | 0.24  | 0.00  | -0.04 | -0.04 | -0.34 | -0.34 | -0.03 | -0.27 | -0.36 | -0.36 |
| SnF3     | 2.03  | 0.00  | -0.04 | -0.04 | -0.16 | -0.16 | -0.05 | -0.25 | -0.22 | -0.22 |
| SnH4     | 1.66  | 0.00  | 0.00  | -0.01 | -0.03 | -0.07 | 0.02  | 0.00  | -0.06 | -0.10 |
| SnO      | 0.83  | 0.00  | -0.03 | -0.03 | -0.23 | -0.23 | -0.08 | -0.22 | -0.33 | -0.33 |
| SnO2     | 0.42  | 0.00  | -0.03 | -0.03 | -0.29 | -0.29 | -0.11 | -0.32 | -0.43 | -0.43 |
| TeF3     | 1.05  | 0.00  | -0.07 | -0.07 | -0.25 | -0.25 | -0.06 | -0.28 | -0.27 | -0.27 |
| TeH2     | 1.34  | 0.00  | 0.00  | -0.01 | -0.03 | -0.10 | 0.03  | 0.01  | -0.01 | -0.09 |
| TeO      | 0.29  | 0.00  | -0.04 | -0.04 | -0.29 | -0.29 | 0.00  | -0.19 | -0.31 | -0.31 |
| TeO2     | 0.21  | 0.00  | -0.05 | -0.05 | -0.42 | -0.42 | -0.06 | -0.37 | -0.47 | -0.47 |
| XeF2     | -0.49 | 0.00  | -0.07 | -0.07 | -0.07 | -0.07 | -0.11 | -0.24 | -0.21 | -0.21 |
| XeF4     | -0.71 | 0.00  | -0.10 | -0.10 | -0.07 | -0.07 | -0.15 | -0.35 | -0.27 | -0.27 |
| XeOF4    | -0.94 | 0.00  | -0.11 | -0.11 | -0.10 | -0.10 | -0.16 | -0.48 | -0.40 | -0.40 |
| BiCl6-   | 1.38  | 0.00  | -0.02 | -0.02 | -0.07 | -0.07 | 0.05  | -0.08 | -0.04 | -0.04 |
| BiF      | 0.93  | 0.00  | -0.04 | -0.04 | -0.19 | -0.19 | 0.04  | -0.08 | -0.10 | -0.10 |
| BiF3     | 1.74  | 0.00  | -0.05 | -0.05 | -0.24 | -0.24 | 0.05  | -0.12 | -0.09 | -0.09 |
| BiH3     | 1.16  | 0.00  | 0.00  | -0.01 | -0.05 | -0.09 | 0.02  | -0.01 | 0.00  | -0.06 |
| BiO2     | -0.14 | 0.00  | -0.04 | -0.04 | -0.32 | -0.32 | 0.02  | -0.18 | -0.25 | -0.25 |
| PbF3     | 1.43  | 0.00  | -0.04 | -0.04 | -0.15 | -0.15 | -0.08 | -0.21 | -0.14 | -0.14 |
| PbH4     | 1.32  | 0.00  | 0.00  | -0.01 | -0.04 | -0.09 | 0.06  | 0.04  | 0.04  | 0.00  |
| PbO      | 0.45  | 0.00  | -0.04 | -0.04 | -0.26 | -0.26 | -0.05 | -0.18 | -0.26 | -0.26 |
| PbO2     | -0.04 | 0.00  | -0.03 | -0.03 | -0.31 | -0.31 | -0.18 | -0.39 | -0.42 | -0.42 |
| TlCl     | 1.59  | 0.00  | -0.01 | -0.01 | -0.05 | -0.05 | 0.00  | -0.02 | -0.04 | -0.04 |
| TlCl3    | 1.34  | 0.00  | -0.01 | -0.01 | -0.04 | -0.04 | 0.08  | 0.01  | 0.06  | 0.06  |
| TlH      | 0.82  | 0.00  | 0.00  | 0.00  | -0.03 | -0.04 | 0.00  | -0.01 | -0.02 | -0.03 |
| TlH3     | 1.12  | 0.00  | 0.00  | -0.01 | -0.04 | -0.08 | 0.06  | 0.05  | 0.03  | 0.00  |
| TlO      | 0.33  | 0.00  | -0.02 | -0.02 | -0.16 | -0.16 | 0.15  | 0.06  | 0.03  | 0.03  |
| CoCl3    | 1.49  | 0.00  | -0.03 | -0.08 | -0.20 | -0.19 | -0.09 | -0.13 | -0.19 | -0.19 |
| CoF2     | 2.11  | -0.01 | -0.17 | -0.21 | -0.31 | -0.14 | -0.08 | -0.12 | -0.14 | -0.14 |
| CoF3     | 2.01  | -0.01 | -0.07 | -0.13 | -0.26 | -0.25 | -0.14 | -0.20 | -0.25 | -0.25 |
| CrCO6    | 3.16  | 0.00  | 0.00  | 0.00  | 0.06  | 0.05  | 0.00  | -0.08 | 0.05  | 0.05  |
| CrCl3    | 1.49  | 0.00  | -0.02 | -0.06 | -0.23 | -0.26 | -0.08 | -0.16 | -0.26 | -0.26 |
| CrF3     | 2.15  | 0.00  | -0.04 | -0.09 | -0.26 | -0.33 | -0.12 | -0.23 | -0.33 | -0.33 |
| CrO3     | -0.80 | 0.00  | -0.01 | -0.05 | -0.32 | -0.48 | -0.09 | -0.28 | -0.48 | -0.48 |
| Cu2      | 0.16  | 0.00  | 0.00  | -0.01 | 0.07  | 0.06  | 0.00  | 0.00  | 0.06  | 0.06  |
| Cu2O     | 0.26  | -0.01 | -0.03 | -0.08 | -0.06 | -0.08 | -0.09 | -0.12 | -0.08 | -0.08 |
| Cu2S     | 0.79  | 0.00  | -0.02 | -0.05 | -0.01 | -0.02 | -0.04 | -0.06 | -0.02 | -0.02 |
| CuCN     | 2.30  | 0.00  | -0.01 | -0.01 | 0.04  | 0.03  | -0.01 | -0.06 | 0.03  | 0.03  |
| CuCl     | 1.29  | 0.00  | -0.02 | -0.04 | -0.04 | -0.04 | -0.04 | -0.04 | -0.04 | -0.04 |
| CuF      | 1.15  | -0.01 | -0.04 | -0.07 | -0.09 | -0.10 | -0.07 | -0.09 | -0.10 | -0.10 |
| CuH      | 0.68  | 0.00  | -0.01 | -0.03 | -0.02 | -0.05 | -0.02 | -0.03 | -0.03 | -0.05 |
| FeCO5    | 2.87  | 0.00  | 0.00  | 0.00  | 0.05  | 0.05  | 0.00  | -0.08 | 0.05  | 0.05  |
| FeF2     | 2.43  | 0.00  | -0.04 | -0.07 | -0.15 | -0.16 | -0.08 | -0.13 | -0.16 | -0.16 |
| FeF3     | 2.48  | -0.01 | -0.06 | -0.12 | -0.24 | -0.24 | -0.13 | -0.19 | -0.24 | -0.24 |
| FeO      | 0.27  | 0.00  | -0.02 | -0.09 | -0.17 | -0.20 | -0.10 | -0.18 | -0.20 | -0.20 |
| Ferrocen | 3.29  | 0.00  | 0.00  | -0.01 | 0.08  | 0.04  | -0.01 | -0.03 | 0.08  | 0.04  |
| MnF2     | 2.32  | 0.00  | -0.03 | -0.07 | -0.14 | -0.16 | -0.09 | -0.13 | -0.16 | -0.16 |
| MnO      | 0.25  | 0.00  | -0.02 | -0.08 | -0.15 | -0.19 | -0.10 | -0.17 | -0.19 | -0.19 |
| MnO2     | -0.42 | 0.00  | -0.02 | -0.07 | -0.20 | -0.27 | -0.10 | -0.20 | -0.27 | -0.27 |
| MnO3F    | -1.41 | 0.00  | -0.02 | -0.06 | -0.17 | -0.26 | -0.09 | -0.24 | -0.26 | -0.26 |
| MnO4-    | -1.12 | 0.00  | -0.02 | -0.06 | -0.30 | -0.41 | -0.10 | -0.27 | -0.41 | -0.41 |
| MnS      | 0.40  | 0.00  | -0.02 | -0.07 | -0.17 | -0.19 | -0.08 | -0.13 | -0.19 | -0.19 |
| NiCO4    | 2.94  | 0.00  | 0.00  | 0.00  | 0.05  | 0.07  | 0.00  | -0.06 | 0.07  | 0.07  |
| NiCl2    | 1.84  | 0.00  | -0.02 | -0.05 | -0.12 | -0.11 | -0.06 | -0.09 | -0.11 | -0.11 |
| NiF2     | 2.04  | -0.01 | -0.04 | -0.08 | -0.15 | -0.15 | -0.09 | -0.13 | -0.15 | -0.15 |
| NiF3     | 1.62  | -0.01 | -0.07 | -0.15 | -0.25 | -0.25 | -0.15 | -0.22 | -0.25 | -0.25 |
| NiO      | -0.29 | 0.00  | -0.04 | -0.10 | -0.22 | -0.22 | -0.11 | -0.16 | -0.22 | -0.22 |
| NiS      | -0.10 | -0.01 | -0.03 | -0.08 | -0.21 | -0.20 | -0.09 | -0.14 | -0.20 | -0.20 |
| ScCl3    | 2.89  | 0.00  | 0.01  | -0.01 | -0.04 | -0.12 | -0.07 | -0.12 | -0.12 | -0.12 |
| ScF3     | 3.58  | 0.00  | 0.00  | -0.03 | -0.03 | -0.12 | -0.10 | -0.17 | -0.12 | -0.12 |
| ScH3     | 1.53  | 0.00  | 0.01  | -0.01 | -0.07 | -0.14 | -0.01 | -0.03 | -0.08 | -0.14 |
| ScO      | 1.56  | 0.00  | 0.00  | -0.04 | -0.08 | -0.19 | -0.09 | -0.18 | -0.19 | -0.19 |
| TiCO4    | 3.03  | 0.00  | 0.00  | 0.00  | 0.04  | 0.04  | 0.00  | -0.06 | 0.04  | 0.04  |
| TiCl4    | 2.23  | 0.00  | 0.00  | -0.02 | -0.14 | -0.21 | -0.07 | -0.14 | -0.21 | -0.21 |
| TiF3     | 3.22  | 0.00  | -0.01 | -0.03 | -0.08 | -0.18 | -0.11 | -0.18 | -0.18 | -0.18 |
| TiF4     | 3.16  | 0.00  | -0.01 | -0.03 | -0.14 | -0.27 | -0.12 | -0.23 | -0.27 | -0.27 |
| TiH4     | 1.14  | 0.00  | 0.00  | -0.01 | -0.11 | -0.20 | 0.00  | -0.02 | -0.11 | -0.20 |
| TiO      | 1.27  | 0.00  | 0.01  | -0.03 | -0.09 | -0.21 | -0.08 | -0.17 | -0.21 | -0.21 |
| TiO2     | 1.26  | 0.00  | 0.01  | -0.01 | -0.10 | -0.24 | -0.08 | -0.19 | -0.24 | -0.24 |
| TiS2     | 0.76  | 0.00  | 0.01  | 0.01  | -0.11 | -0.16 | -0.05 | -0.07 | -0.16 | -0.16 |
| VH5      | 0.61  | 0.00  | 0.00  | -0.01 | -0.08 | -0.17 | 0.00  | -0.02 | -0.08 | -0.17 |

|        |       |       |       |       |       |       |       |       |       |       |
|--------|-------|-------|-------|-------|-------|-------|-------|-------|-------|-------|
| VO     | 0.89  | 0.00  | 0.00  | -0.05 | -0.12 | -0.20 | -0.08 | -0.16 | -0.20 | -0.20 |
| VOF3   | 1.95  | 0.00  | -0.01 | -0.05 | -0.22 | -0.36 | -0.12 | -0.25 | -0.36 | -0.36 |
| ZnCl2  | 1.78  | 0.00  | -0.03 | -0.04 | -0.07 | -0.07 | -0.05 | -0.07 | -0.07 | -0.07 |
| ZnF2   | 1.87  | -0.01 | -0.06 | -0.07 | -0.11 | -0.12 | -0.08 | -0.12 | -0.12 | -0.12 |
| ZnH2   | 1.13  | 0.00  | -0.01 | -0.02 | -0.02 | -0.06 | -0.01 | -0.03 | -0.02 | -0.06 |
| ZnMe2  | 2.57  | 0.00  | -0.01 | -0.01 | 0.03  | -0.02 | 0.00  | -0.01 | 0.03  | -0.02 |
| Ag2    | 0.20  | 0.00  | -0.01 | -0.02 | -0.02 | -0.04 | -0.02 | -0.03 | -0.04 | -0.04 |
| AgCl   | 1.10  | 0.00  | -0.02 | -0.04 | -0.05 | -0.07 | -0.04 | -0.06 | -0.07 | -0.07 |
| CdF2   | 1.42  | -0.01 | -0.06 | -0.09 | -0.10 | -0.11 | -0.09 | -0.12 | -0.11 | -0.11 |
| CdMe2  | 2.49  | 0.00  | -0.01 | -0.02 | 0.02  | -0.04 | -0.01 | -0.02 | 0.02  | -0.04 |
| MoCO6  | 3.58  | 0.00  | -0.01 | -0.01 | 0.06  | 0.04  | -0.01 | -0.10 | 0.04  | 0.04  |
| MoF3   | 2.36  | 0.00  | -0.03 | -0.09 | -0.06 | -0.21 | -0.16 | -0.35 | -0.21 | -0.21 |
| MoH    | 0.62  | 0.00  | -0.01 | -0.02 | -0.02 | -0.08 | -0.02 | -0.05 | -0.05 | -0.08 |
| MoO2   | 0.91  | 0.00  | -0.03 | -0.10 | -0.12 | -0.42 | -0.14 | -0.45 | -0.42 | -0.42 |
| MoO3   | 1.04  | 0.00  | -0.03 | -0.10 | -0.15 | -0.52 | -0.17 | -0.57 | -0.52 | -0.52 |
| NbF3   | 2.92  | 0.00  | -0.02 | -0.08 | -0.04 | -0.22 | -0.16 | -0.36 | -0.22 | -0.22 |
| NbO    | 1.71  | 0.00  | -0.01 | -0.06 | -0.05 | -0.27 | -0.08 | -0.29 | -0.27 | -0.27 |
| NbO2   | 1.90  | 0.00  | -0.02 | -0.07 | -0.07 | -0.34 | -0.11 | -0.37 | -0.34 | -0.34 |
| NbO2F  | 2.52  | 0.00  | -0.03 | -0.09 | -0.07 | -0.38 | -0.15 | -0.46 | -0.38 | -0.38 |
| PdCO4  | 3.37  | 0.00  | -0.01 | -0.01 | 0.04  | 0.04  | -0.01 | -0.09 | 0.04  | 0.04  |
| PdF    | 1.21  | -0.01 | -0.03 | -0.08 | -0.11 | -0.18 | -0.10 | -0.17 | -0.18 | -0.18 |
| PdO2   | -0.96 | -0.01 | -0.04 | -0.11 | -0.23 | -0.34 | -0.16 | -0.30 | -0.34 | -0.34 |
| RhF    | 0.84  | -0.01 | -0.04 | -0.09 | 0.08  | -0.12 | -0.11 | -0.14 | -0.12 | -0.12 |
| RhF4   | 0.94  | -0.01 | -0.08 | -0.14 | -0.20 | -0.22 | -0.19 | -0.27 | -0.22 | -0.22 |
| RhF6   | 0.19  | -0.01 | -0.09 | -0.17 | -0.27 | -0.37 | -0.26 | -0.44 | -0.37 | -0.37 |
| RhO    | -0.30 | -0.01 | -0.04 | -0.08 | -0.12 | -0.14 | -0.10 | -0.13 | -0.14 | -0.14 |
| RuCO5  | 3.50  | 0.00  | -0.01 | -0.01 | 0.05  | 0.04  | -0.01 | -0.09 | 0.04  | 0.04  |
| RuF    | 0.71  | -0.01 | -0.04 | -0.09 | -0.10 | -0.02 | -0.11 | -0.12 | -0.11 | -0.11 |
| RuO    | 0.39  | 0.00  | -0.01 | -0.04 | -0.11 | -0.20 | -0.07 | -0.20 | -0.20 | -0.20 |
| RuO2   | 0.11  | 0.00  | -0.03 | -0.11 | -0.21 | -0.45 | -0.15 | -0.46 | -0.45 | -0.45 |
| RuO4   | -0.28 | -0.01 | -0.04 | -0.12 | -0.27 | -0.56 | -0.18 | -0.56 | -0.56 | -0.56 |
| Tc2O7  | 0.90  | -0.01 | -0.04 | -0.13 | -0.22 | -0.60 | -0.21 | -0.62 | -0.60 | -0.60 |
| TcO    | 0.70  | 0.00  | -0.03 | -0.07 | -0.12 | -0.27 | -0.10 | -0.27 | -0.27 | -0.27 |
| TcO3F  | 1.00  | -0.01 | -0.05 | -0.13 | -0.22 | -0.57 | -0.20 | -0.60 | -0.57 | -0.57 |
| YF     | 2.59  | -0.01 | -0.03 | -0.05 | -0.03 | -0.11 | -0.11 | -0.19 | -0.11 | -0.11 |
| YF3    | 3.81  | -0.01 | -0.05 | -0.07 | 0.01  | -0.12 | -0.13 | -0.23 | -0.12 | -0.12 |
| YO     | 2.00  | 0.00  | -0.04 | -0.07 | -0.11 | -0.29 | -0.11 | -0.29 | -0.29 | -0.29 |
| ZrF    | 2.31  | 0.00  | -0.01 | -0.03 | -0.02 | -0.08 | -0.09 | -0.15 | -0.08 | -0.08 |
| ZrF3   | 3.76  | 0.00  | -0.03 | -0.07 | 0.00  | -0.15 | -0.14 | -0.28 | -0.15 | -0.15 |
| ZrO    | 2.14  | 0.00  | -0.02 | -0.05 | -0.08 | -0.28 | -0.10 | -0.29 | -0.28 | -0.28 |
| ZrO2   | 2.31  | 0.00  | -0.03 | -0.07 | -0.06 | -0.32 | -0.11 | -0.35 | -0.32 | -0.32 |
| Au2    | 0.40  | -0.01 | -0.03 | -0.04 | -0.06 | -0.10 | -0.07 | -0.10 | -0.10 | -0.10 |
| Au3-   | 0.98  | -0.01 | -0.02 | -0.03 | -0.08 | -0.10 | -0.08 | -0.10 | -0.10 | -0.10 |
| AuCl   | 0.85  | 0.00  | -0.02 | -0.03 | -0.08 | -0.12 | -0.07 | -0.12 | -0.12 | -0.12 |
| AuCl3  | 0.48  | 0.00  | -0.02 | -0.04 | -0.10 | -0.14 | -0.10 | -0.19 | -0.14 | -0.14 |
| HfF    | 2.52  | 0.00  | -0.01 | -0.04 | -0.12 | -0.21 | -0.15 | -0.25 | -0.21 | -0.21 |
| HfF3   | 3.89  | 0.00  | -0.01 | -0.05 | -0.06 | -0.20 | -0.16 | -0.31 | -0.20 | -0.20 |
| HfO    | 2.28  | 0.00  | -0.01 | -0.03 | -0.17 | -0.36 | -0.14 | -0.31 | -0.36 | -0.36 |
| HfO2   | 2.27  | 0.00  | -0.01 | -0.04 | -0.14 | -0.37 | -0.15 | -0.37 | -0.37 | -0.37 |
| Hg2Cl2 | 0.81  | 0.00  | -0.01 | -0.02 | -0.15 | -0.17 | -0.14 | -0.19 | -0.17 | -0.17 |
| HgF2   | 0.85  | -0.01 | -0.03 | -0.05 | -0.12 | -0.17 | -0.12 | -0.20 | -0.17 | -0.17 |
| HgMe2  | 2.45  | 0.00  | 0.00  | -0.01 | 0.00  | -0.06 | -0.03 | -0.05 | -0.01 | -0.06 |
| IrF6   | 1.06  | -0.01 | -0.03 | -0.09 | -0.21 | -0.44 | -0.28 | -0.57 | -0.44 | -0.44 |
| OsCO5  | 3.66  | 0.00  | -0.01 | -0.01 | 0.01  | -0.02 | -0.05 | -0.15 | -0.02 | -0.02 |
| OsO2   | 0.94  | 0.00  | -0.04 | -0.10 | -0.29 | -0.63 | -0.25 | -0.62 | -0.63 | -0.63 |
| OsO3   | 1.11  | 0.00  | -0.02 | -0.09 | -0.30 | -0.71 | -0.26 | -0.71 | -0.71 | -0.71 |
| OsO4   | 0.86  | 0.00  | -0.02 | -0.09 | -0.31 | -0.81 | -0.28 | -0.81 | -0.81 | -0.81 |
| OsOF5  | 1.46  | 0.00  | -0.02 | -0.08 | -0.19 | -0.48 | -0.25 | -0.55 | -0.48 | -0.48 |
| PtCO4  | 3.49  | 0.00  | -0.01 | 0.00  | 0.00  | 0.00  | -0.05 | -0.14 | 0.00  | 0.00  |
| PtO    | 0.06  | -0.01 | -0.06 | -0.08 | -0.12 | -0.22 | -0.11 | -0.21 | -0.22 | -0.22 |
| PtO2   | -0.29 | 0.00  | -0.03 | -0.08 | -0.31 | -0.64 | -0.25 | -0.62 | -0.64 | -0.64 |
| ReH    | 0.45  | 0.00  | -0.01 | -0.02 | -0.08 | -0.16 | -0.06 | -0.10 | -0.10 | -0.16 |
| ReO    | 0.71  | 0.00  | -0.03 | -0.07 | -0.27 | -0.48 | -0.25 | -0.46 | -0.48 | -0.48 |
| ReO2   | 1.27  | 0.00  | -0.02 | -0.06 | -0.33 | -0.65 | -0.30 | -0.66 | -0.65 | -0.65 |
| ReO3   | 1.61  | 0.00  | -0.02 | -0.08 | -0.31 | -0.70 | -0.27 | -0.69 | -0.70 | -0.70 |
| ReO3F  | 1.78  | 0.00  | -0.01 | -0.09 | -0.27 | -0.72 | -0.27 | -0.75 | -0.72 | -0.72 |
| TaF    | 2.12  | 0.00  | -0.01 | -0.04 | -0.14 | -0.24 | -0.15 | -0.27 | -0.24 | -0.24 |
| TaF3   | 3.39  | 0.00  | -0.01 | -0.06 | -0.10 | -0.27 | -0.18 | -0.38 | -0.27 | -0.27 |
| TaO2F  | 2.96  | 0.00  | -0.01 | -0.06 | -0.17 | -0.47 | -0.21 | -0.51 | -0.47 | -0.47 |
| WCO6   | 3.72  | 0.00  | -0.01 | -0.01 | 0.02  | 0.01  | -0.03 | -0.12 | 0.01  | 0.01  |
| WF3    | 2.75  | 0.00  | -0.02 | -0.07 | -0.09 | -0.27 | -0.18 | -0.39 | -0.27 | -0.27 |
| WH     | 0.87  | 0.00  | -0.01 | -0.03 | -0.09 | -0.16 | -0.08 | -0.12 | -0.12 | -0.16 |
| WO     | -1.27 | -0.01 | -0.02 | -0.12 | -0.18 | -0.43 | -0.16 | -0.43 | -0.43 | -0.43 |
| WO2    | 1.34  | 0.00  | -0.01 | -0.08 | -0.22 | -0.58 | -0.20 | -0.57 | -0.58 | -0.58 |
| WO3    | 1.82  | 0.00  | -0.02 | -0.08 | -0.28 | -0.72 | -0.27 | -0.72 | -0.72 | -0.72 |

```

!
!
!
!=====
!   non-zero dipole moments / Debye: DFT(BP86)
!=====
!
!
!
!compound  QZVPP      def2-      def-
!           QZVP    TZVPP    TZVP   SVP   SV(P) | TZVPP    def-
!           -QZVPP -QZVPP -QZVPP -QZVPP -QZVPP | -QZVPP -QZVPP -QZVPP -QZVPP
!
BaF        3.27    0.07    0.11    0.11   -0.20  -0.20    0.19    0.29   -0.20  -0.20
BaF2       7.22    0.08    0.11    0.11   -0.53  -0.53    0.02    0.10   -0.53  -0.53
BaH2       7.03    0.06    0.12    0.10   -0.18  -0.17   -0.11   -0.12   -0.18  -0.17
BaO        7.87   -0.04   -0.10   -0.10   -0.73  -0.73   -0.43   -0.39   -0.73  -0.73
BaS       10.01   -0.01   -0.12   -0.12   -0.89  -0.89   -0.41   -0.30   -0.89  -0.89
BeF2O2H4   3.00    0.00    0.00   -0.07    0.02   -0.14    0.05   -0.06    0.02   -0.14
BeS        5.09    0.00   -0.15   -0.15   -0.44  -0.44   -0.18   -0.17   -0.44  -0.44
CsF        8.84   -0.04   -0.10   -0.11   -0.71  -0.71    0.64    1.45   -0.41  -0.41
CsH        7.98   -0.04   -0.01   -0.02   -0.21  -0.20    0.49    0.70    0.39    0.42
CsO        9.98   -0.06   -0.17   -0.18   -0.90  -0.90    0.73    1.37   -0.76  -0.76
K2S        7.25    0.01   -0.18   -0.18   -1.17  -1.17   -0.38   -0.33   -1.67  -1.67
K3P        4.83    0.00    0.01    0.02   -0.74  -0.74   -0.49   -0.46   -1.23  -1.23
KBr       10.67    0.03    0.06    0.06   -0.36  -0.36    0.57    1.08    0.17    0.17
KCl       10.25    0.02   -0.01    0.00   -0.67  -0.67    0.58    1.05   -0.25  -0.25
KF         8.64   -0.01   -0.01   -0.01   -0.85  -0.85    0.42    0.73   -0.92  -0.92
KH         7.65    0.00   -0.12   -0.09   -0.10  -0.07    0.20    0.19    0.11    0.14
KI        11.24    0.01    0.13    0.13    0.00    0.00    0.80    1.23    1.23    1.23
LiBH4     6.08    0.00    0.05    0.12    0.02    0.09    0.08    0.03   -0.01    0.06
LiCl      6.98    0.00   -0.01    0.08   -0.46  -0.46    0.09    0.19   -0.22  -0.22
LiF       6.09    0.00    0.00    0.01   -0.70  -0.70    0.01    0.10   -0.53  -0.53
LiH       5.78    0.00    0.00    0.00   -0.22  -0.19    0.00   -0.22   -0.30  -0.27
MgF       3.22    0.00    0.00    0.00   -0.21  -0.21    0.08    1.37    0.86    0.86
Na3N      1.49   -0.01   -0.08   -0.08   -0.21  -0.21   -0.29   -0.28   -0.73  -0.73
Na3P      5.10   -0.01   -0.07   -0.07   -0.38  -0.38   -0.13   -0.01   -0.55  -0.55
NaCl      8.62    0.02   -0.07   -0.07   -0.67  -0.67    0.10    0.41   -0.64  -0.64
NaF       7.76    0.02   -0.08   -0.08   -0.79  -0.79   -0.01    0.11   -1.09  -1.09
NaH       5.98    0.00   -0.01   -0.01   0.00    0.03    0.04    0.07    0.03    0.07
PLi3     6.34    0.00   -0.04   -0.05   -0.30  -0.30   -0.05    0.50    0.08    0.08
RbF       9.21   -0.01   -0.05   -0.05   -0.56  -0.56    0.31    0.67   -1.04  -1.04
RbH       7.73   -0.01   0.10    0.13    0.04    0.06    0.29    0.42    0.20    0.22
RbO      10.17   -0.01   -0.08   -0.08   -0.46  -0.46    0.18    0.49   -1.47  -1.47
SrF       3.33    0.05    0.08    0.11   -0.18  -0.18    0.12    0.21   -0.18  -0.18
SrF2     6.25    0.07    0.07    0.07   -0.26  -0.26    0.07    0.13   -0.26  -0.26
SrH2     6.20    0.04    0.05    0.04   -0.08  -0.06   -0.05   -0.04   -0.08  -0.06
SrO       7.90    0.01   -0.07   -0.09   -0.49  -0.49   -0.28   -0.19   -0.49  -0.49
SrS       9.81    0.00   -0.11   -0.11   -0.67  -0.67   -0.36   -0.23   -0.67  -0.67
BH3CO    1.11    0.00    0.03    0.04    0.16    0.20    0.03    0.03    0.16    0.20
BH3NH3   5.37    0.00    0.06    0.12    0.34    0.43    0.06    0.21    0.34    0.43
C2H3N    1.89    0.00    0.00    0.02    0.06    0.11    0.00    0.15    0.06    0.11
CH2O     2.21   -0.01   -0.04   -0.03   -0.21  -0.21   -0.04    0.01   -0.21  -0.21
CH2O2    2.38    0.00   -0.01    0.00    0.03    0.03   -0.01    0.14    0.03    0.03
CH3N     1.95    0.00   -0.01    0.02   -0.12  -0.06   -0.01    0.08   -0.12  -0.06
CH3OH    1.57    0.00   -0.01    0.04    0.00    0.09   -0.01    0.17    0.00    0.09
CO        0.16    0.00    0.01    0.01    0.14    0.14    0.01   -0.01    0.14    0.14
H2CO3    0.29    0.00   -0.02   -0.06   -0.16  -0.27   -0.02   -0.19   -0.16  -0.27
H2O      1.90    0.00    0.03    0.18    0.08    0.26    0.03    0.25    0.08    0.26
H2O2     1.64    0.00    0.03    0.10    0.11    0.19    0.03    0.18    0.11    0.19
HCN      2.97   -0.01   -0.02   -0.01   -0.19  -0.18   -0.02   -0.02   -0.19  -0.18
HF        1.81    0.00    0.01    0.10    0.01    0.12    0.01    0.13    0.01    0.12
HNC       3.06    0.00    0.03    0.05    0.09    0.10    0.03    0.04    0.09    0.10
HNO      1.53    0.00   -0.01    0.00    0.00    0.01   -0.01    0.07    0.00    0.01
HNO2     2.47    0.00    0.01    0.02   -0.01  -0.03    0.01    0.08   -0.01  -0.03
HNO3     2.14    0.00    0.02    0.05    0.04    0.05    0.02    0.10    0.04    0.05
N2H2     2.74    0.00    0.03    0.10    0.12    0.20    0.03    0.27    0.12    0.20
N2H4     1.92    0.00    0.04    0.13    0.13    0.26    0.04    0.24    0.13    0.26
NF3       0.17    0.00   -0.03   -0.03   -0.10  -0.10   -0.03    0.02   -0.10  -0.10
NH3       1.63    0.00    0.07    0.18    0.16    0.34    0.07    0.29    0.16    0.34
NH4F     4.77    0.00    0.05    0.15    0.16    0.38    0.05    0.24    0.16    0.38
OF2       0.29    0.00   -0.01   -0.01   -0.07  -0.07   -0.01    0.00   -0.07  -0.07
Al2S3    4.00    0.01   -0.04   -0.03   -0.55  -0.55   -0.03   -0.21   -0.55  -0.55
AlN       2.90    0.03   -0.08   -0.10   -0.62  -0.62   -0.09   -0.06   -0.62  -0.62
ClF       0.88    0.01    0.09    0.09    0.22    0.22    0.09    0.26    0.22    0.22
ClF3      0.73    0.00    0.06    0.05    0.20    0.20    0.06    0.22    0.20    0.20
H2SO4    0.83    0.00   -0.02   -0.09   -0.25  -0.40   -0.02   -0.26   -0.25  -0.40

```

|       |      |       |       |       |       |       |       |       |       |       |
|-------|------|-------|-------|-------|-------|-------|-------|-------|-------|-------|
| H3PO4 | 0.39 | 0.00  | 0.04  | 0.15  | 0.39  | 0.62  | 0.03  | 0.43  | 0.39  | 0.62  |
| HCP   | 0.38 | 0.00  | -0.01 | 0.03  | 0.15  | 0.16  | 0.07  | 0.05  | 0.15  | 0.16  |
| HCl   | 1.14 | 0.00  | 0.05  | 0.11  | 0.20  | 0.25  | 0.07  | 0.27  | 0.20  | 0.25  |
| HSH   | 1.02 | 0.00  | 0.06  | 0.11  | 0.28  | 0.33  | 0.09  | 0.35  | 0.28  | 0.33  |
| HSSH  | 1.12 | 0.00  | 0.06  | 0.10  | 0.29  | 0.32  | 0.08  | 0.34  | 0.29  | 0.32  |
| PF3   | 1.18 | 0.00  | 0.01  | 0.01  | 0.03  | 0.03  | 0.04  | 0.23  | 0.03  | 0.03  |
| PH3   | 0.56 | 0.00  | 0.04  | 0.06  | 0.28  | 0.32  | 0.06  | 0.28  | 0.28  | 0.32  |
| S5    | 0.26 | 0.01  | -0.04 | 0.02  | 0.07  | 0.07  | 0.05  | 0.13  | 0.07  | 0.07  |
| SF2   | 1.07 | 0.00  | 0.08  | 0.08  | 0.23  | 0.23  | 0.09  | 0.33  | 0.23  | 0.23  |
| SF4   | 0.80 | 0.00  | 0.01  | 0.01  | 0.15  | 0.15  | 0.04  | 0.22  | 0.15  | 0.15  |
| AsCl3 | 1.54 | 0.00  | 0.02  | 0.03  | 0.06  | 0.06  | 0.04  | 0.24  | 0.06  | 0.06  |
| AsH3  | 0.24 | 0.00  | 0.00  | 0.00  | 0.17  | 0.17  | 0.00  | 0.13  | 0.17  | 0.17  |
| BrCl  | 0.50 | 0.00  | -0.02 | -0.02 | 0.01  | 0.01  | -0.02 | 0.06  | 0.01  | 0.01  |
| GaCl  | 2.42 | 0.00  | -0.04 | -0.04 | -0.48 | -0.48 | -0.03 | 0.10  | -0.48 | -0.48 |
| GaF   | 2.22 | 0.00  | -0.06 | -0.06 | -0.46 | -0.46 | -0.06 | 0.03  | -0.46 | -0.46 |
| GaF2  | 2.31 | -0.02 | -0.05 | -0.05 | -0.30 | -0.30 | -0.05 | 0.08  | -0.30 | -0.30 |
| GaO   | 3.64 | 0.03  | -0.07 | -0.07 | -0.49 | -0.49 | -0.07 | 0.00  | -0.49 | -0.49 |
| GeF3  | 2.03 | -0.02 | -0.04 | -0.04 | -0.15 | -0.15 | -0.04 | 0.11  | -0.15 | -0.15 |
| GeO   | 3.18 | 0.00  | -0.03 | -0.03 | -0.45 | -0.45 | -0.03 | 0.01  | -0.45 | -0.45 |
| HBr   | 0.89 | 0.00  | 0.01  | 0.03  | 0.15  | 0.15  | 0.01  | 0.18  | 0.15  | 0.15  |
| HCCl3 | 0.87 | 0.00  | 0.01  | 0.02  | 0.03  | 0.03  | 0.01  | 0.07  | 0.03  | 0.03  |
| SeH2  | 0.71 | 0.00  | 0.00  | 0.01  | 0.17  | 0.18  | 0.00  | 0.19  | 0.17  | 0.18  |
| SeO   | 2.04 | 0.00  | 0.00  | 0.00  | -0.04 | -0.04 | 0.00  | 0.15  | -0.04 | -0.04 |
| SeO2  | 2.61 | 0.00  | -0.03 | -0.03 | -0.10 | -0.10 | -0.03 | 0.09  | -0.10 | -0.10 |
| ICl   | 1.23 | -0.01 | 0.02  | 0.02  | 0.10  | 0.10  | -0.08 | 0.12  | -0.04 | -0.04 |
| IH    | 0.44 | -0.01 | 0.02  | 0.03  | 0.18  | 0.18  | 0.10  | 0.22  | 0.30  | 0.29  |
| InCl  | 3.41 | 0.00  | -0.06 | -0.06 | -0.58 | -0.58 | -0.33 | -0.13 | -0.67 | -0.67 |
| InH   | 1.05 | -0.01 | -0.03 | -0.03 | -0.28 | -0.28 | -0.37 | -0.37 | -0.66 | -0.65 |
| InO   | 4.00 | 0.02  | -0.09 | -0.09 | -0.56 | -0.56 | 0.10  | 0.19  | -0.47 | -0.47 |
| SbF   | 2.40 | -0.01 | 0.06  | 0.06  | -0.05 | -0.05 | -0.01 | 0.32  | -0.05 | -0.05 |
| SbF3  | 3.80 | 0.00  | 0.04  | 0.04  | -0.18 | -0.18 | -0.09 | 0.25  | -0.15 | -0.15 |
| SbH3  | 0.47 | 0.00  | 0.01  | 0.01  | -0.18 | -0.16 | -0.14 | -0.20 | -0.42 | -0.45 |
| SbO2  | 2.96 | 0.02  | 0.01  | 0.01  | -0.25 | -0.25 | -0.04 | 0.10  | -0.21 | -0.21 |
| SnF3  | 3.02 | -0.01 | -0.01 | -0.01 | -0.25 | -0.25 | 0.01  | 0.21  | -0.22 | -0.22 |
| SnO   | 4.10 | 0.00  | -0.07 | -0.07 | -0.59 | -0.59 | 0.04  | 0.20  | -0.38 | -0.38 |
| TeF3  | 0.96 | 0.00  | 0.02  | 0.02  | -0.07 | -0.07 | -0.03 | 0.08  | -0.03 | -0.03 |
| TeH2  | 0.11 | 0.00  | 0.02  | 0.03  | 0.18  | 0.17  | 0.15  | 0.31  | 0.44  | 0.42  |
| TeO   | 2.84 | 0.01  | 0.04  | 0.04  | -0.14 | -0.14 | -0.05 | 0.15  | -0.17 | -0.17 |
| TeO2  | 3.78 | 0.00  | 0.00  | 0.00  | -0.20 | -0.20 | -0.07 | 0.16  | -0.06 | -0.06 |
| XeOF4 | 1.41 | 0.00  | -0.02 | -0.02 | 0.15  | 0.15  | -0.04 | -0.01 | 0.21  | 0.21  |
| BiF   | 2.96 | -0.01 | 0.05  | 0.05  | -0.11 | -0.11 | -0.03 | 0.41  | -0.08 | -0.08 |
| BiF3  | 4.82 | 0.00  | 0.03  | 0.03  | -0.23 | -0.23 | 0.13  | 0.47  | -0.07 | -0.07 |
| BiH3  | 1.18 | 0.00  | 0.01  | 0.01  | -0.14 | -0.12 | -0.10 | -0.19 | -0.21 | -0.20 |
| BiO2  | 3.83 | 0.02  | 0.02  | 0.02  | -0.30 | -0.30 | -0.05 | 0.09  | -0.23 | -0.23 |
| PbF3  | 3.32 | 0.00  | -0.01 | -0.01 | -0.29 | -0.29 | 0.12  | 0.28  | -0.24 | -0.24 |
| PbO   | 4.28 | 0.00  | -0.08 | -0.08 | -0.56 | -0.56 | 0.01  | 0.12  | -0.33 | -0.33 |
| TlCl  | 4.43 | 0.00  | -0.07 | -0.07 | -0.67 | -0.67 | -0.17 | 0.04  | -0.75 | -0.75 |
| TlCl3 | 0.03 | 0.00  | 0.00  | 0.00  | 0.00  | 0.00  | 0.01  | 0.01  | 0.01  | 0.01  |
| TlH   | 1.52 | 0.00  | -0.04 | -0.04 | -0.29 | -0.28 | -0.24 | -0.28 | -0.54 | -0.52 |
| TlO   | 3.86 | 0.02  | -0.09 | -0.09 | -0.50 | -0.50 | 0.21  | 0.30  | -0.39 | -0.39 |
| CoF2  | 0.03 | 0.01  | 0.00  | 0.00  | 0.00  | 0.01  | 0.02  | 0.02  | 0.01  | 0.01  |
| Cu2O  | 3.43 | 0.04  | 0.08  | 0.27  | 0.20  | 0.20  | 0.32  | 0.36  | 0.20  | 0.20  |
| Cu2S  | 3.97 | 0.02  | -0.05 | 0.08  | 0.28  | 0.28  | 0.31  | 0.33  | 0.28  | 0.28  |
| CuCN  | 6.50 | 0.02  | -0.03 | -0.04 | 0.02  | 0.03  | 0.15  | 0.15  | 0.03  | 0.03  |
| CuCl  | 4.42 | 0.02  | -0.05 | 0.05  | 0.15  | 0.16  | 0.20  | 0.25  | 0.16  | 0.16  |
| CuF   | 4.43 | 0.05  | 0.08  | 0.18  | -0.02 | -0.01 | 0.23  | 0.28  | -0.01 | -0.01 |
| CuH   | 2.25 | 0.02  | -0.06 | -0.09 | -0.03 | -0.02 | -0.06 | -0.08 | -0.03 | -0.01 |
| FeO   | 4.11 | 0.05  | 0.00  | 0.10  | -0.06 | -0.06 | 0.23  | 0.29  | -0.05 | -0.05 |
| MnO   | 4.12 | 0.03  | -0.01 | 0.11  | -0.18 | -0.17 | 0.21  | 0.27  | -0.17 | -0.17 |
| MnO2  | 2.37 | 0.02  | 0.02  | 0.11  | 0.11  | 0.12  | 0.20  | 0.23  | 0.12  | 0.12  |
| MnO3F | 0.09 | 0.01  | 0.01  | 0.04  | -0.04 | -0.02 | 0.05  | 0.08  | -0.03 | -0.03 |
| MnS   | 4.97 | 0.02  | -0.08 | 0.11  | 0.32  | 0.31  | 0.41  | 0.49  | 0.32  | 0.32  |
| NiO   | 3.77 | 0.06  | 0.00  | 0.07  | 0.09  | 0.08  | 0.23  | 0.27  | 0.09  | 0.09  |
| NiS   | 3.35 | 0.02  | -0.03 | 0.01  | 0.61  | 0.60  | 0.49  | 0.54  | 0.60  | 0.61  |
| ScO   | 3.56 | 0.02  | 0.05  | 0.35  | -0.17 | -0.11 | 0.24  | 0.30  | -0.11 | -0.11 |
| TiO   | 3.34 | -0.02 | -0.02 | 0.25  | -0.22 | -0.17 | 0.15  | 0.20  | -0.17 | -0.17 |
| TiO2  | 6.51 | 0.00  | -0.03 | 0.05  | -0.18 | -0.19 | 0.07  | 0.08  | -0.19 | -0.19 |
| TiS2  | 5.47 | 0.00  | -0.01 | 0.07  | 0.24  | 0.21  | 0.24  | 0.30  | 0.21  | 0.21  |
| VH5   | 1.19 | 0.00  | 0.01  | 0.01  | 0.03  | 0.02  | 0.03  | 0.02  | 0.03  | 0.02  |
| VO    | 3.24 | 0.00  | 0.01  | 0.22  | -0.20 | -0.16 | 0.14  | 0.19  | -0.16 | -0.16 |
| VOF3  | 0.48 | 0.00  | -0.01 | -0.04 | 0.03  | 0.00  | -0.06 | -0.10 | 0.00  | 0.00  |
| AgCl  | 4.90 | 0.04  | -0.01 | 0.04  | -0.40 | -0.36 | 0.11  | 0.21  | -0.36 | -0.36 |
| CdMe2 | 0.01 | 0.00  | 0.00  | 0.00  | 0.00  | 0.00  | 0.00  | 0.00  | 0.00  | 0.00  |
| MoH   | 2.20 | -0.01 | 0.03  | 0.06  | 0.03  | 0.04  | 0.08  | 0.07  | 0.04  | 0.04  |
| MoO2  | 4.03 | -0.01 | 0.03  | 0.09  | -0.01 | 0.02  | 0.15  | 0.21  | 0.02  | 0.02  |

|       |      |       |       |       |       |       |       |       |       |       |
|-------|------|-------|-------|-------|-------|-------|-------|-------|-------|-------|
| MoO3  | 5.03 | 0.00  | 0.04  | 0.11  | 0.08  | 0.07  | 0.14  | 0.17  | 0.07  | 0.07  |
| NbO   | 3.49 | 0.00  | -0.01 | 0.03  | -0.06 | -0.01 | 0.09  | 0.12  | -0.02 | -0.02 |
| NbO2  | 4.90 | -0.01 | -0.01 | 0.04  | -0.04 | 0.05  | 0.15  | 0.24  | 0.05  | 0.05  |
| NbO2F | 5.20 | 0.00  | 0.01  | 0.08  | 0.01  | 0.01  | 0.13  | 0.14  | 0.01  | 0.01  |
| PdF   | 4.07 | 0.06  | 0.09  | 0.15  | -0.21 | -0.18 | 0.23  | 0.29  | -0.17 | -0.17 |
| RhF   | 4.00 | 0.06  | 0.09  | 0.18  | -0.33 | -0.10 | 0.22  | 0.29  | -0.10 | -0.10 |
| RhO   | 3.26 | 0.05  | 0.05  | 0.08  | -0.07 | -0.06 | 0.11  | 0.14  | -0.06 | -0.06 |
| RuF   | 3.83 | 0.06  | 0.08  | 0.17  | -0.45 | -0.42 | -0.01 | 0.06  | -0.42 | -0.42 |
| RuO   | 3.29 | 0.03  | 0.06  | 0.10  | -0.11 | -0.09 | 0.14  | 0.18  | -0.10 | -0.10 |
| RuO4  | 0.03 | -0.02 | -0.03 | -0.03 | -0.02 | -0.02 | -0.02 | -0.02 | -0.02 | -0.02 |
| TcO   | 3.43 | 0.02  | 0.05  | 0.09  | -0.14 | -0.11 | 0.16  | 0.21  | -0.11 | -0.11 |
| TcO3F | 0.62 | 0.01  | -0.02 | -0.05 | 0.06  | 0.01  | -0.09 | -0.16 | 0.01  | 0.01  |
| YF    | 1.89 | 0.04  | 0.11  | 0.10  | 0.00  | 0.10  | 0.30  | 0.41  | 0.10  | 0.10  |
| YF3   | 0.06 | 0.00  | 0.00  | 0.00  | 0.00  | 0.00  | 0.00  | 0.00  | 0.00  | 0.00  |
| YO    | 4.71 | -0.01 | -0.03 | -0.04 | -0.17 | -0.12 | 0.07  | 0.12  | -0.13 | -0.13 |
| ZrF   | 2.84 | 0.00  | 0.04  | 0.15  | 0.06  | 0.13  | 0.32  | 0.39  | 0.12  | 0.12  |
| ZrO   | 4.03 | -0.01 | -0.01 | 0.04  | -0.06 | -0.01 | 0.13  | 0.17  | -0.01 | -0.01 |
| ZrO2  | 7.53 | 0.00  | -0.05 | 0.04  | -0.18 | -0.17 | 0.13  | 0.13  | -0.17 | -0.17 |
| AuCl  | 3.20 | 0.03  | 0.08  | 0.12  | -0.31 | -0.26 | 0.14  | 0.22  | -0.26 | -0.26 |
| HfF   | 1.62 | 0.04  | 0.05  | 0.08  | 0.18  | 0.26  | 0.36  | 0.46  | 0.27  | 0.27  |
| HfO   | 3.37 | 0.04  | 0.02  | 0.01  | -0.01 | 0.06  | 0.14  | 0.20  | 0.06  | 0.06  |
| HfO2  | 7.52 | 0.00  | -0.05 | 0.01  | -0.24 | -0.14 | 0.14  | 0.16  | -0.14 | -0.14 |
| OsO2  | 1.73 | 0.01  | 0.06  | 0.11  | 0.05  | 0.11  | 0.19  | 0.22  | 0.11  | 0.11  |
| OsOF5 | 1.48 | 0.00  | 0.01  | 0.06  | -0.16 | -0.09 | 0.14  | 0.28  | -0.08 | -0.08 |
| PtO   | 2.38 | 0.03  | 0.05  | 0.09  | 0.00  | 0.05  | 0.12  | 0.16  | 0.05  | 0.05  |
| ReH   | 1.11 | 0.04  | 0.04  | 0.03  | 0.05  | 0.06  | 0.09  | 0.07  | 0.05  | 0.06  |
| ReO   | 3.27 | 0.03  | 0.01  | 0.06  | 0.02  | 0.11  | 0.35  | 0.40  | 0.10  | 0.10  |
| ReO3F | 1.15 | -0.01 | -0.01 | -0.03 | 0.02  | -0.05 | -0.09 | -0.19 | -0.04 | -0.04 |
| TaF   | 0.88 | 0.07  | 0.06  | 0.08  | 0.14  | 0.23  | 0.29  | 0.37  | 0.24  | 0.24  |
| TaO2F | 2.05 | 0.01  | 0.00  | -0.03 | -0.11 | -0.21 | -0.14 | -0.28 | -0.21 | -0.21 |
| WH    | 1.77 | -0.01 | 0.03  | 0.05  | 0.14  | 0.17  | 0.20  | 0.19  | 0.17  | 0.16  |
| WO    | 2.17 | 0.00  | 0.00  | 0.00  | 0.03  | 0.13  | 0.07  | 0.14  | 0.13  | 0.13  |
| WO2   | 3.07 | 0.03  | 0.01  | 0.01  | 0.09  | 0.21  | 0.19  | 0.26  | 0.20  | 0.20  |

!  
!  
!

=====

! non-zero dipole moments / Debye: HF

=====

| !compound | def2- |        |        |        |        |        | def-   |        |        |        |
|-----------|-------|--------|--------|--------|--------|--------|--------|--------|--------|--------|
|           | QZVPP | QZVP   | TZVPP  | TZVP   | SVP    | SV(P)  | TZVPP  | TZVP   | SVP    | SV(P)  |
| !         |       | -QZVPP | -QZVPP | -QZVPP | -QZVPP | -QZVPP | -QZVPP | -QZVPP | -QZVPP | -QZVPP |
| !         |       |        |        |        |        |        |        |        |        |        |
| BaF       | 2.61  | 0.14   | 0.24   | 0.29   | 0.39   | 0.38   | 0.53   | 0.69   | 0.40   | 0.40   |
| BaF2      | 8.22  | 0.10   | 0.21   | 0.21   | 0.09   | 0.09   | 0.31   | 0.47   | 0.09   | 0.09   |
| BaH2      | 8.54  | 0.08   | 0.19   | 0.25   | 0.17   | 0.23   | 0.14   | 0.20   | 0.17   | 0.23   |
| BaO       | 10.45 | -0.02  | -0.03  | -0.03  | -0.55  | -0.55  | -0.33  | -0.23  | -0.55  | -0.55  |
| BaS       | 13.49 | 0.00   | -0.07  | -0.07  | -0.80  | -0.80  | -0.31  | -0.16  | -0.80  | -0.80  |
| BeF2O2H4  | 3.07  | 0.00   | 0.01   | -0.05  | 0.00   | -0.13  | 0.06   | -0.03  | 0.00   | -0.13  |
| BeS       | 6.55  | 0.00   | -0.14  | -0.14  | -0.36  | -0.36  | -0.16  | -0.09  | -0.36  | -0.36  |
| CsF       | 9.78  | 0.04   | 0.04   | 0.06   | -0.19  | -0.19  | 0.55   | 1.67   | 1.55   | 1.55   |
| CsH       | 9.84  | -0.02  | 0.08   | 0.14   | 0.06   | 0.08   | 0.54   | 1.40   | 1.09   | 1.13   |
| CsO       | 10.94 | 0.05   | 0.03   | 0.04   | -0.33  | -0.33  | 0.65   | 1.50   | 1.19   | 1.19   |
| K2S       | 9.14  | 0.02   | -0.12  | -0.12  | -0.80  | -0.80  | 0.20   | 0.57   | -0.66  | -0.66  |
| K3P       | 5.41  | 0.00   | 0.35   | 0.35   | -0.53  | -0.53  | -1.53  | -1.37  | -2.54  | -2.54  |
| KBr       | 11.43 | 0.03   | 0.03   | 0.03   | -0.13  | -0.13  | 0.48   | 1.13   | 0.65   | 0.65   |
| KCl       | 10.94 | 0.02   | 0.04   | 0.05   | -0.31  | -0.31  | 0.59   | 1.19   | 0.54   | 0.54   |
| KF        | 9.33  | -0.01  | 0.07   | 0.07   | -0.20  | -0.20  | 0.50   | 0.99   | 0.70   | 0.70   |
| KH        | 9.05  | 0.00   | -0.05  | -0.01  | -0.06  | -0.01  | 0.27   | 0.49   | 0.36   | 0.42   |
| KI        | 12.11 | 0.01   | 0.08   | 0.08   | 0.14   | 0.14   | 0.70   | 1.24   | 1.29   | 1.29   |
| LiBH4     | 6.30  | 0.00   | 0.06   | 0.14   | 0.15   | 0.24   | 0.08   | 0.07   | 0.08   | 0.17   |
| LiCl      | 7.39  | 0.00   | 0.03   | 0.12   | -0.16  | -0.16  | 0.13   | 0.28   | 0.01   | 0.01   |
| LiF       | 6.47  | 0.00   | 0.06   | 0.11   | -0.18  | -0.18  | 0.11   | 0.24   | -0.08  | -0.08  |
| LiH       | 6.09  | 0.00   | 0.03   | 0.04   | -0.08  | -0.04  | 0.02   | -0.13  | -0.12  | -0.08  |
| MgF       | 3.25  | 0.00   | 0.05   | 0.05   | 0.06   | 0.06   | 0.35   | 1.87   | 1.71   | 1.71   |
| Na3N      | 3.34  | 0.06   | 0.17   | 0.17   | 0.28   | 0.28   | 0.82   | 0.10   | 1.31   | 1.31   |
| Na3P      | 6.39  | -0.01  | -0.14  | -0.15  | -0.44  | -0.44  | -0.22  | 0.02   | -0.60  | -0.60  |
| NaCl      | 9.22  | 0.02   | -0.01  | -0.01  | -0.29  | -0.29  | 0.22   | 0.59   | -0.08  | -0.08  |
| NaF       | 8.32  | 0.02   | 0.01   | 0.01   | -0.14  | -0.14  | 0.21   | 0.37   | -0.04  | -0.04  |
| NaH       | 7.01  | 0.01   | -0.01  | -0.01  | 0.12   | 0.16   | 0.06   | 0.13   | 0.14   | 0.20   |
| PLi3      | 7.52  | 0.00   | -0.10  | -0.08  | -0.22  | -0.22  | -0.05  | 0.57   | 0.22   | 0.22   |
| RbF       | 9.94  | 0.03   | 0.03   | 0.03   | -0.20  | -0.20  | 0.47   | 1.07   | 0.80   | 0.80   |
| RbH       | 9.56  | 0.00   | 0.05   | 0.11   | 0.11   | 0.15   | 0.29   | 0.72   | 0.49   | 0.52   |
| RbO       | 10.79 | 0.04   | 0.03   | 0.03   | -0.15  | -0.15  | 0.52   | 0.99   | 0.56   | 0.56   |



|        |       |       |       |       |       |       |       |       |       |       |
|--------|-------|-------|-------|-------|-------|-------|-------|-------|-------|-------|
| SrF    | 2.81  | 0.12  | 0.22  | 0.25  | 0.16  | 0.15  | 0.30  | 0.44  | 0.17  | 0.17  |
| SrF2   | 6.98  | 0.08  | 0.15  | 0.17  | 0.10  | 0.10  | 0.23  | 0.34  | 0.10  | 0.10  |
| SrH2   | 7.30  | 0.05  | 0.07  | 0.09  | 0.07  | 0.11  | 0.06  | 0.09  | 0.07  | 0.11  |
| SrO    | 11.38 | 0.00  | -0.07 | -0.09 | -0.41 | -0.41 | -0.26 | -0.14 | -0.41 | -0.41 |
| SrS    | 13.59 | 0.00  | -0.12 | -0.14 | -0.61 | -0.61 | -0.28 | -0.11 | -0.61 | -0.61 |
| BH3CO  | 1.53  | 0.00  | 0.02  | 0.04  | 0.14  | 0.20  | 0.02  | 0.06  | 0.14  | 0.20  |
| BH3NH3 | 5.49  | 0.00  | 0.06  | 0.10  | 0.33  | 0.41  | 0.06  | 0.19  | 0.33  | 0.41  |
| C2H3N  | 2.10  | 0.00  | 0.01  | 0.02  | 0.17  | 0.21  | 0.01  | 0.14  | 0.17  | 0.21  |
| CH2O   | 2.84  | 0.00  | -0.02 | -0.02 | -0.06 | -0.07 | -0.02 | 0.04  | -0.06 | -0.07 |
| CH2O2  | 2.95  | 0.00  | 0.00  | 0.00  | 0.25  | 0.23  | 0.00  | 0.17  | 0.25  | 0.23  |
| CH3N   | 2.26  | 0.00  | -0.01 | 0.01  | -0.02 | 0.02  | -0.01 | 0.10  | -0.02 | 0.02  |
| CH3OH  | 1.78  | 0.00  | 0.00  | 0.04  | 0.10  | 0.17  | 0.00  | 0.17  | 0.10  | 0.17  |
| CO     | 0.34  | 0.00  | -0.01 | -0.01 | -0.04 | -0.04 | -0.01 | 0.05  | -0.04 | -0.04 |
| H2CO3  | 0.31  | 0.00  | -0.02 | -0.06 | -0.20 | -0.30 | -0.02 | -0.19 | -0.20 | -0.30 |
| H2O    | 2.07  | 0.00  | 0.03  | 0.14  | 0.12  | 0.26  | 0.03  | 0.22  | 0.12  | 0.26  |
| H2O2   | 1.80  | 0.00  | 0.02  | 0.08  | 0.14  | 0.19  | 0.02  | 0.16  | 0.14  | 0.19  |
| HCN    | 3.33  | 0.00  | -0.01 | 0.00  | -0.09 | -0.10 | -0.01 | -0.01 | -0.09 | -0.10 |
| HF     | 1.97  | 0.00  | 0.01  | 0.08  | 0.05  | 0.13  | 0.01  | 0.11  | 0.05  | 0.13  |
| HNC    | 2.84  | 0.00  | 0.02  | 0.04  | 0.08  | 0.08  | 0.02  | 0.01  | 0.08  | 0.08  |
| HNO    | 1.97  | 0.00  | 0.01  | 0.01  | 0.11  | 0.08  | 0.01  | 0.09  | 0.11  | 0.08  |
| HNO2   | 3.06  | 0.00  | 0.04  | 0.04  | 0.15  | 0.10  | 0.04  | 0.15  | 0.15  | 0.10  |
| HNO3   | 2.57  | 0.00  | 0.02  | 0.04  | 0.07  | 0.04  | 0.02  | 0.11  | 0.07  | 0.04  |
| N2H2   | 3.02  | 0.00  | 0.04  | 0.08  | 0.22  | 0.24  | 0.04  | 0.26  | 0.22  | 0.24  |
| N2H4   | 2.06  | 0.00  | 0.03  | 0.09  | 0.14  | 0.24  | 0.03  | 0.19  | 0.14  | 0.24  |
| NF3    | 0.43  | 0.00  | -0.01 | -0.01 | 0.03  | 0.03  | -0.01 | 0.06  | 0.03  | 0.03  |
| NH3    | 1.76  | 0.00  | 0.05  | 0.13  | 0.16  | 0.30  | 0.05  | 0.23  | 0.16  | 0.30  |
| NH4F   | 4.90  | 0.00  | 0.04  | 0.11  | 0.18  | 0.34  | 0.04  | 0.20  | 0.18  | 0.34  |
| OF2    | 0.44  | 0.00  | 0.00  | 0.00  | -0.04 | -0.04 | 0.00  | 0.01  | -0.04 | -0.04 |
| Al2S3  | 5.38  | 0.00  | -0.07 | -0.06 | -0.63 | -0.63 | -0.05 | -0.24 | -0.63 | -0.63 |
| AlN    | 1.53  | 0.00  | -0.07 | -0.06 | -0.42 | -0.42 | -0.06 | 0.01  | -0.42 | -0.42 |
| ClF    | 1.30  | 0.00  | 0.08  | 0.08  | 0.32  | 0.32  | 0.08  | 0.24  | 0.32  | 0.32  |
| ClF3   | 0.70  | 0.00  | 0.04  | 0.04  | 0.19  | 0.19  | 0.04  | 0.12  | 0.19  | 0.19  |
| H2SO4  | 1.03  | 0.00  | -0.02 | -0.08 | -0.27 | -0.42 | -0.01 | -0.21 | -0.27 | -0.42 |
| H3PO4  | 0.44  | 0.00  | 0.04  | 0.14  | 0.46  | 0.68  | 0.03  | 0.42  | 0.46  | 0.68  |
| HCP    | 0.37  | 0.00  | 0.02  | 0.02  | 0.13  | 0.11  | 0.05  | 0.07  | 0.13  | 0.11  |
| HCl    | 1.24  | 0.00  | 0.04  | 0.08  | 0.20  | 0.23  | 0.06  | 0.23  | 0.20  | 0.23  |
| HSH    | 1.10  | 0.00  | 0.04  | 0.07  | 0.23  | 0.26  | 0.05  | 0.25  | 0.23  | 0.26  |
| HSSH   | 1.26  | 0.00  | 0.04  | 0.06  | 0.26  | 0.26  | 0.05  | 0.25  | 0.26  | 0.26  |
| PF3    | 1.60  | 0.00  | 0.05  | 0.04  | 0.33  | 0.33  | 0.07  | 0.32  | 0.33  | 0.33  |
| PH3    | 0.59  | 0.00  | -0.01 | 0.00  | 0.13  | 0.12  | 0.01  | 0.09  | 0.13  | 0.12  |
| S5     | 0.34  | 0.00  | 0.00  | 0.00  | 0.03  | 0.03  | 0.00  | 0.09  | 0.03  | 0.03  |
| SF2    | 1.60  | 0.00  | 0.09  | 0.10  | 0.44  | 0.44  | 0.11  | 0.38  | 0.44  | 0.44  |
| SF4    | 1.10  | 0.00  | 0.04  | 0.03  | 0.32  | 0.32  | 0.05  | 0.24  | 0.32  | 0.32  |
| AsCl3  | 1.75  | -0.01 | 0.06  | 0.06  | 0.27  | 0.27  | 0.08  | 0.37  | 0.27  | 0.27  |
| AsH3   | 0.26  | 0.01  | -0.01 | -0.01 | 0.09  | 0.06  | -0.01 | 0.02  | 0.09  | 0.06  |
| BrCl   | 0.60  | 0.00  | 0.00  | 0.00  | 0.06  | 0.06  | 0.01  | 0.11  | 0.06  | 0.06  |
| GaCl   | 2.57  | -0.01 | 0.00  | 0.00  | -0.26 | -0.26 | 0.02  | 0.22  | -0.26 | -0.26 |
| GaF    | 2.39  | 0.00  | -0.02 | -0.02 | -0.16 | -0.16 | -0.02 | 0.13  | -0.16 | -0.16 |
| GaF2   | 2.89  | 0.01  | -0.01 | -0.01 | 0.06  | 0.06  | -0.01 | 0.22  | 0.06  | 0.06  |
| GaO    | 2.84  | 0.00  | -0.06 | -0.06 | -0.25 | -0.25 | -0.06 | 0.08  | -0.25 | -0.25 |
| GeF3   | 2.72  | 0.00  | 0.01  | 0.01  | 0.20  | 0.20  | 0.01  | 0.24  | 0.20  | 0.20  |
| GeO    | 4.34  | 0.00  | -0.02 | -0.02 | -0.30 | -0.30 | -0.02 | 0.05  | -0.30 | -0.30 |
| HBr    | 1.00  | 0.00  | 0.01  | 0.03  | 0.14  | 0.13  | 0.01  | 0.14  | 0.14  | 0.13  |
| HCBBr3 | 1.04  | 0.00  | 0.01  | 0.02  | 0.03  | 0.00  | 0.01  | 0.08  | 0.03  | 0.00  |
| SeH2   | 0.80  | 0.00  | 0.00  | 0.00  | 0.14  | 0.12  | 0.00  | 0.12  | 0.14  | 0.12  |
| SeO    | 2.63  | 0.00  | -0.03 | -0.03 | -0.04 | -0.04 | -0.03 | 0.05  | -0.04 | -0.04 |
| SeO2   | 3.40  | -0.01 | 0.00  | 0.00  | 0.12  | 0.12  | 0.00  | 0.17  | 0.12  | 0.12  |
| ICl    | 1.56  | 0.00  | 0.05  | 0.05  | 0.21  | 0.21  | -0.02 | 0.21  | 0.09  | 0.09  |
| IH     | 0.54  | 0.00  | 0.01  | 0.01  | 0.12  | 0.10  | 0.04  | 0.11  | 0.17  | 0.14  |
| InCl   | 3.55  | 0.00  | 0.00  | 0.00  | -0.27 | -0.27 | -0.04 | 0.25  | -0.14 | -0.14 |
| InH    | 0.70  | 0.00  | 0.00  | 0.00  | -0.21 | -0.19 | -0.06 | -0.06 | -0.30 | -0.28 |
| InO    | 3.18  | 0.00  | -0.04 | -0.04 | -0.23 | -0.23 | -0.04 | 0.14  | -0.25 | -0.25 |
| SbF    | 3.02  | 0.00  | 0.10  | 0.10  | 0.30  | 0.30  | 0.10  | 0.51  | 0.33  | 0.33  |
| SbF3   | 4.38  | 0.00  | 0.10  | 0.10  | 0.27  | 0.27  | 0.06  | 0.50  | 0.34  | 0.34  |
| SbH3   | 0.46  | 0.00  | 0.04  | 0.04  | -0.02 | 0.02  | 0.05  | 0.07  | -0.18 | -0.14 |
| SbO2   | 3.19  | 0.01  | 0.01  | 0.01  | 0.05  | 0.05  | 0.00  | 0.19  | 0.13  | 0.13  |
| SnF3   | 3.87  | 0.00  | 0.06  | 0.06  | 0.21  | 0.21  | -0.02 | 0.29  | 0.12  | 0.12  |
| SnO    | 5.61  | 0.00  | -0.05 | -0.05 | -0.40 | -0.40 | 0.20  | 0.38  | -0.12 | -0.12 |
| TeF3   | 1.05  | 0.00  | 0.03  | 0.03  | -0.05 | -0.05 | 0.03  | 0.08  | -0.01 | -0.01 |
| TeH2   | 0.19  | 0.00  | 0.00  | 0.00  | 0.08  | 0.05  | 0.00  | 0.06  | 0.19  | 0.15  |
| TeO    | 3.66  | 0.02  | -0.04 | -0.04 | -0.31 | -0.31 | -0.22 | -0.20 | -0.40 | -0.40 |
| TeO2   | 4.92  | 0.00  | 0.03  | 0.03  | 0.07  | 0.07  | 0.02  | 0.32  | 0.24  | 0.24  |
| XeOF4  | 1.42  | 0.00  | -0.02 | -0.02 | 0.17  | 0.17  | -0.05 | -0.05 | 0.14  | 0.14  |
| BiF    | 3.79  | 0.00  | 0.11  | 0.11  | 0.26  | 0.26  | 0.13  | 0.68  | 0.39  | 0.39  |
| BiF3   | 5.72  | 0.00  | 0.10  | 0.10  | 0.25  | 0.25  | 0.52  | 0.94  | 0.55  | 0.55  |

|       |       |       |       |       |       |       |       |       |       |       |
|-------|-------|-------|-------|-------|-------|-------|-------|-------|-------|-------|
| BiH3  | 1.30  | 0.00  | 0.04  | 0.04  | -0.02 | 0.02  | 0.23  | 0.26  | 0.23  | 0.26  |
| BiO2  | 4.16  | 0.01  | 0.03  | 0.03  | 0.03  | 0.03  | 0.15  | 0.42  | 0.19  | 0.19  |
| PbF3  | 4.32  | 0.00  | 0.04  | 0.04  | 0.08  | 0.08  | 0.18  | 0.43  | 0.14  | 0.14  |
| PbO   | 5.93  | 0.00  | -0.06 | -0.06 | -0.35 | -0.35 | 0.39  | 0.49  | 0.07  | 0.07  |
| TlCl  | 4.96  | 0.00  | -0.01 | 0.00  | -0.34 | -0.34 | -0.02 | 0.26  | -0.32 | -0.32 |
| TlH   | 1.38  | 0.00  | -0.02 | -0.02 | -0.22 | -0.19 | 0.01  | -0.08 | -0.25 | -0.23 |
| TlO   | 3.78  | 0.00  | -0.04 | -0.04 | -0.18 | -0.18 | 0.06  | 0.24  | -0.17 | -0.17 |
| Cu2O  | 6.09  | 0.06  | 0.05  | 0.22  | 0.10  | 0.11  | 0.24  | 0.31  | 0.11  | 0.11  |
| Cu2S  | 7.17  | 0.04  | -0.02 | 0.19  | 0.06  | 0.08  | 0.30  | 0.38  | 0.08  | 0.08  |
| CuCN  | 8.26  | 0.02  | 0.00  | 0.03  | 0.03  | 0.08  | 0.13  | 0.18  | 0.08  | 0.08  |
| CuCl  | 6.39  | 0.03  | 0.01  | 0.13  | 0.14  | 0.19  | 0.23  | 0.34  | 0.19  | 0.19  |
| CuF   | 6.17  | 0.07  | 0.11  | 0.21  | 0.19  | 0.25  | 0.29  | 0.39  | 0.25  | 0.25  |
| CuH   | 4.05  | 0.03  | -0.04 | -0.05 | -0.08 | -0.05 | -0.02 | -0.02 | -0.05 | -0.05 |
| FeO   | 2.15  | 0.02  | 0.11  | 0.50  | 0.40  | 0.40  | 0.56  | 0.64  | 0.40  | 0.40  |
| MnO   | 2.40  | 0.02  | 0.08  | 0.49  | 0.27  | 0.28  | 0.50  | 0.59  | 0.28  | 0.28  |
| MnO2  | 3.95  | 0.02  | 0.03  | 0.11  | 0.13  | 0.14  | 0.14  | 0.19  | 0.14  | 0.14  |
| MnO3F | 2.33  | 0.03  | 0.07  | 0.08  | 0.11  | 0.11  | 0.11  | 0.15  | 0.11  | 0.11  |
| MnS   | 5.14  | -0.03 | -0.10 | 0.23  | 0.04  | 0.04  | 0.29  | 0.59  | 0.04  | 0.04  |
| NiO   | 2.40  | 0.01  | 0.18  | 0.56  | 0.53  | 0.52  | 0.67  | 0.75  | 0.52  | 0.52  |
| NiS   | 6.59  | 0.02  | -0.15 | -0.31 | -0.74 | -0.84 | -0.32 | 0.23  | -0.84 | -0.84 |
| ScO   | 4.42  | 0.01  | 0.05  | 0.60  | 0.38  | 0.54  | 0.63  | 0.75  | 0.54  | 0.54  |
| TiO   | 4.07  | 0.00  | 0.01  | 0.57  | 0.28  | 0.41  | 0.54  | 0.66  | 0.41  | 0.41  |
| TiO2  | 8.28  | 0.00  | 0.00  | 0.10  | -0.02 | -0.01 | 0.11  | 0.16  | -0.01 | -0.01 |
| TiS2  | 6.59  | 0.00  | 0.00  | 0.10  | 0.28  | 0.22  | 0.27  | 0.37  | 0.22  | 0.22  |
| VH5   | 0.74  | 0.00  | 0.00  | 0.00  | -0.16 | -0.22 | 0.00  | -0.05 | -0.18 | -0.22 |
| VO    | 2.37  | 0.00  | 0.07  | 0.69  | 0.41  | 0.47  | 0.65  | 0.79  | 0.47  | 0.47  |
| VOF3  | 0.37  | -0.01 | -0.03 | -0.07 | -0.26 | -0.32 | -0.12 | -0.21 | -0.32 | -0.32 |
| AgCl  | 7.01  | 0.05  | 0.06  | 0.17  | -0.19 | -0.07 | 0.24  | 0.47  | -0.07 | -0.07 |
| MoH   | 3.24  | 0.00  | 0.04  | 0.11  | 0.08  | 0.20  | 0.12  | 0.16  | 0.15  | 0.20  |
| MoO2  | 5.99  | 0.00  | 0.03  | -0.04 | -0.01 | -1.42 | -0.14 | -1.44 | -1.41 | -1.41 |
| MoO3  | 6.19  | 0.00  | 0.07  | 0.16  | 0.28  | 0.22  | 0.18  | 0.19  | 0.22  | 0.22  |
| NbO   | 4.49  | 0.01  | -0.02 | 0.03  | 0.08  | 0.27  | 0.11  | 0.27  | 0.27  | 0.27  |
| NbO2  | 7.01  | 0.04  | 0.01  | -0.09 | 0.04  | -0.41 | -0.23 | -0.56 | -0.41 | -0.41 |
| NbO2F | 6.51  | 0.00  | 0.03  | 0.12  | 0.22  | 0.21  | 0.17  | 0.20  | 0.21  | 0.21  |
| PdF   | 6.17  | 0.08  | 0.18  | 0.33  | 0.15  | 0.26  | 0.39  | 0.55  | 0.26  | 0.26  |
| RhF   | 6.10  | 0.08  | 0.19  | 0.35  | -0.10 | 0.34  | 0.41  | 0.59  | 0.34  | 0.34  |
| RhO   | 5.49  | 0.03  | -0.02 | -0.12 | -0.33 | -0.41 | -0.17 | -0.32 | -0.41 | -0.41 |
| RuF   | 5.75  | 0.09  | 0.22  | 0.41  | 0.27  | 0.27  | 0.48  | 0.66  | 0.42  | 0.42  |
| RuO   | 2.59  | 0.01  | 0.01  | 0.05  | 0.02  | 0.00  | 0.07  | 0.17  | 0.00  | 0.00  |
| TcO   | 3.07  | -0.03 | -0.06 | -0.02 | -0.08 | -0.10 | 0.03  | 0.11  | -0.10 | -0.10 |
| TcO3F | 0.58  | 0.00  | -0.05 | -0.11 | -0.09 | -0.23 | -0.19 | -0.40 | -0.23 | -0.23 |
| YF    | 1.78  | 0.01  | 0.11  | 0.11  | 0.21  | 0.50  | 0.40  | 0.66  | 0.51  | 0.51  |
| YO    | 5.45  | 0.00  | 0.02  | 0.00  | -0.06 | 0.23  | 0.14  | 0.35  | 0.23  | 0.23  |
| ZrF   | 3.10  | 0.01  | 0.07  | 0.19  | 0.36  | 0.58  | 0.50  | 0.72  | 0.58  | 0.58  |
| ZrO   | 4.91  | -0.01 | -0.02 | 0.04  | 0.12  | 0.36  | 0.20  | 0.39  | 0.36  | 0.36  |
| ZrO2  | 9.81  | 0.00  | -0.04 | 0.07  | 0.06  | 0.10  | 0.18  | 0.22  | 0.10  | 0.10  |
| AuCl  | 5.49  | 0.04  | 0.14  | 0.20  | -0.11 | 0.05  | 0.28  | 0.54  | 0.05  | 0.05  |
| HfF   | 1.30  | 0.00  | 0.16  | 0.22  | 0.50  | 0.74  | 0.51  | 0.73  | 0.74  | 0.74  |
| HfO   | 4.34  | 0.00  | 0.04  | 0.05  | 0.18  | 0.51  | 0.26  | 0.48  | 0.51  | 0.51  |
| HfO2  | 10.21 | 0.00  | -0.03 | 0.04  | -0.06 | 0.07  | 0.17  | 0.21  | 0.07  | 0.07  |
| OsO2  | 2.98  | 0.02  | 0.16  | 0.22  | 0.42  | 0.54  | 0.42  | 0.51  | 0.54  | 0.54  |
| OsOF5 | 5.72  | 0.01  | 0.22  | 0.21  | 0.27  | 0.61  | 0.50  | 0.89  | 0.61  | 0.61  |
| PtO   | 3.22  | 0.06  | -0.05 | -0.08 | -0.13 | -0.22 | -0.13 | -0.28 | -0.22 | -0.22 |
| ReO   | 4.62  | -0.01 | -0.01 | -0.03 | -0.01 | -0.08 | 0.04  | -0.02 | -0.09 | -0.09 |
| ReO3F | 1.37  | 0.00  | 0.00  | -0.05 | -0.05 | -0.19 | -0.14 | -0.34 | -0.19 | -0.19 |
| TaF   | 0.40  | 0.01  | 0.14  | 0.20  | 0.15  | 0.35  | 0.19  | 0.38  | 0.35  | 0.35  |
| TaO2F | 2.87  | 0.00  | -0.03 | -0.06 | -0.19 | -0.35 | -0.20 | -0.41 | -0.35 | -0.35 |
| WH    | 2.35  | 0.01  | 0.07  | 0.14  | 0.56  | 0.72  | 0.62  | 0.69  | 0.68  | 0.72  |
| WO    | 6.72  | 0.00  | 0.08  | 0.28  | 0.28  | 0.45  | 0.44  | 0.47  | 0.45  | 0.45  |
| WO2   | 5.32  | 0.00  | 0.03  | 0.02  | 0.61  | 0.95  | 0.49  | 0.76  | 0.95  | 0.95  |
