# Supplementary material for: Balanced basis sets of split valence, triple zeta valence and quadruple zeta valence quality for H to Rn: Design and assessment of accuracy
Source: Royal Society of Chemistry journal article supplement (doi:10.1039/b508541a), 2005-01-01
Supplement: b508541a_structures.pdf [file b508541a_structures.pdf]

# Representatively chosen systems containing nearly all elements (H-Rn,  
 # except Lanthanides) in (nearly) all common oxidation states.  
 # Structure parameters were optimized for DFT(BP86)/def-SV(P) and are given  
 # in atomic units.

|                    |                    |                    |    |
|--------------------|--------------------|--------------------|----|
| #BaF               |                    |                    |    |
| 0.0000000000000000 | 0.0000000000000000 | -2.07069892703602  | ba |
| 0.0000000000000000 | 0.0000000000000000 | 2.07069892703602   | f  |
| #BaF2              |                    |                    |    |
| 0.0000000000000000 | 0.0000000000000000 | 1.55847796152849   | ba |
| 3.50406263138391   | 0.0000000000000000 | -0.77923898076424  | f  |
| -3.50406263138391  | 0.0000000000000000 | -0.77923898076424  | f  |
| #BaH2              |                    |                    |    |
| 0.0000000000000000 | 0.0000000000000000 | 1.68536306424487   | ba |
| 3.48553102731125   | 0.0000000000000000 | -0.84268153212243  | h  |
| -3.48553102731125  | 0.0000000000000000 | -0.84268153212243  | h  |
| #BaO               |                    |                    |    |
| 0.0000000000000000 | 0.0000000000000000 | -1.92962468481039  | ba |
| 0.0000000000000000 | 0.0000000000000000 | 1.92962468481039   | o  |
| #BaS               |                    |                    |    |
| 0.0000000000000000 | 0.0000000000000000 | -2.42999531404145  | ba |
| 0.0000000000000000 | 0.0000000000000000 | 2.42999531404145   | s  |
| #Be2F4             |                    |                    |    |
| -2.13361594547065  | 0.0000000000000000 | 0.0000000000000000 | be |
| 2.13361594547065   | 0.0000000000000000 | 0.0000000000000000 | be |
| 0.0000000000000000 | 2.13211302712278   | 0.0000000000000000 | f  |
| 0.0000000000000000 | -2.13211302712278  | 0.0000000000000000 | f  |
| -4.78939030299712  | 0.0000000000000000 | 0.0000000000000000 | f  |
| 4.78939030299712   | 0.0000000000000000 | 0.0000000000000000 | f  |
| #Be2H4             |                    |                    |    |
| 0.0000000000000000 | 0.0000000000000000 | -1.92929449970282  | be |
| 0.0000000000000000 | 0.0000000000000000 | 1.92931071700141   | be |
| 2.05284948165387   | 0.0000000000000000 | -0.00000554462538  | h  |
| -2.05284948165387  | 0.0000000000000000 | -0.00000554462538  | h  |
| 0.0000000000000000 | 0.0000000000000000 | -4.46632923721534  | h  |
| 0.0000000000000000 | 0.0000000000000000 | 4.46632410916751   | h  |
| #Be4               |                    |                    |    |
| 1.98239336244068   | -1.40175406475758  | 0.0000000000000000 | be |
| -1.98240276048822  | -1.40176820517744  | 0.0000000000000000 | be |
| 0.00000469902377   | 1.40176113496751   | -1.98238088228083  | be |
| 0.00000469902377   | 1.40176113496751   | 1.98238088228083   | be |
| #BeC2H6            |                    |                    |    |
| 0.0000000000000000 | 0.0000000000000000 | 0.0000000000000000 | be |
| -0.00020044556495  | 3.18689981828802   | 0.0000000000000000 | c  |
| 0.00020044556495   | -3.18689981828802  | 0.0000000000000000 | c  |
| 1.94277443489397   | 3.99483630431448   | 0.0000000000000000 | h  |
| 0.97131508976867   | -3.99480784611534  | -1.68303202724579  | h  |
| -0.97131508976866  | 3.99480784611534   | -1.68303202724579  | h  |
| -1.94277443489397  | -3.99483630431448  | 0.0000000000000000 | h  |
| -0.97131508976866  | 3.99480784611534   | 1.68303202724579   | h  |
| 0.97131508976867   | -3.99480784611534  | 1.68303202724579   | h  |
| #BeF2O2H4          |                    |                    |    |
| -0.00000032363640  | -0.00000008566633  | -0.88438717282531  | be |
| 0.00000013544101   | -2.55923932656878  | -2.01794116529110  | f  |
| -0.00000415512240  | 2.55924102532360   | -2.01793952586888  | f  |
| 2.70021194774609   | -0.00000008523155  | 1.18317601953195   | o  |
| -2.70021065005859  | 0.00000715003053   | 1.18318161817594   | o  |
| 3.67189018000387   | 1.47880857364976   | 0.63847717253928   | h  |

|                   |                   |                   |    |
|-------------------|-------------------|-------------------|----|
| -3.67189013209522 | -1.47881214872542 | 0.63847438690258  | h  |
| 3.67189002508221  | -1.47880764617565 | 0.63847412415729  | h  |
| -3.67188702736059 | 1.47880254336382  | 0.63848454267826  | h  |
| #BeH2             |                   |                   |    |
| 0.000000000000000 | 0.000000000000000 | 0.000000000000000 | be |
| 0.000000000000000 | 0.000000000000000 | 2.54057183216976  | h  |
| 0.000000000000000 | 0.000000000000000 | -2.54057183216976 | h  |
| #BeS              |                   |                   |    |
| 0.000000000000000 | 0.000000000000000 | -1.67244267945864 | be |
| 0.000000000000000 | 0.000000000000000 | 1.67244267945864  | s  |
| #CaCl2            |                   |                   |    |
| 0.000000000000000 | 0.000000000000000 | 0.000000000000000 | ca |
| 0.000000000000000 | 0.000000000000000 | -4.87191849109726 | cl |
| 0.000000000000000 | 0.000000000000000 | 4.87191849109726  | cl |
| #CaF2             |                   |                   |    |
| 0.000000000000000 | 0.000000000000000 | 0.000000000000000 | ca |
| 0.000000000000000 | 0.000000000000000 | -3.97143043764854 | f  |
| 0.000000000000000 | 0.000000000000000 | 3.97143043764854  | f  |
| #CaH2             |                   |                   |    |
| 0.000000000000000 | 0.000000000000000 | 0.000000000000000 | ca |
| 0.000000000000000 | 0.000000000000000 | 4.04362377931292  | h  |
| 0.000000000000000 | 0.000000000000000 | -4.04362377931292 | h  |
| #CsF              |                   |                   |    |
| 0.000000000000000 | 0.000000000000000 | -2.43002010389848 | f  |
| 0.000000000000000 | 0.000000000000000 | 2.43002010389848  | cs |
| #CsH              |                   |                   |    |
| 0.000000000000000 | 0.000000000000000 | -2.51401278411792 | cs |
| 0.000000000000000 | 0.000000000000000 | 2.51401278411792  | h  |
| #CsO              |                   |                   |    |
| 0.000000000000000 | 0.000000000000000 | -2.61735090985010 | o  |
| 0.000000000000000 | 0.000000000000000 | 2.61735090985010  | cs |
| #K2S              |                   |                   |    |
| 0.000000000000000 | 0.000000000000000 | 1.75493373992356  | s  |
| -4.68812462132366 | 0.000000000000000 | -0.87746686996178 | k  |
| 4.68812462132366  | 0.000000000000000 | -0.87746686996178 | k  |
| #K3P              |                   |                   |    |
| 0.000000000000000 | 0.000000000000000 | 1.89749417626207  | p  |
| 2.58580346543032  | -4.47874298051299 | -0.63249805875402 | k  |
| 2.58580346543032  | 4.47874298051299  | -0.63249805875402 | k  |
| -5.17160693086064 | 0.000000000000000 | -0.63249805875402 | k  |
| #KBr              |                   |                   |    |
| 0.000000000000000 | 0.000000000000000 | -2.75588742538509 | k  |
| 0.000000000000000 | 0.000000000000000 | 2.75588742538509  | br |
| #KCl              |                   |                   |    |
| 0.000000000000000 | 0.000000000000000 | -2.59307106746649 | k  |
| 0.000000000000000 | 0.000000000000000 | 2.59307106746649  | cl |
| #KF               |                   |                   |    |
| 0.000000000000000 | 0.000000000000000 | -2.13462007168556 | k  |
| 0.000000000000000 | 0.000000000000000 | 2.13462007168556  | f  |
| #KH               |                   |                   |    |
| 0.000000000000000 | 0.000000000000000 | -2.20252950247800 | k  |
| 0.000000000000000 | 0.000000000000000 | 2.20252950247800  | h  |
| #KI               |                   |                   |    |
| 0.000000000000000 | 0.000000000000000 | -3.00693295045154 | k  |
| 0.000000000000000 | 0.000000000000000 | 3.00693295045154  | i  |
| #Li2              |                   |                   |    |
| 0.000000000000000 | 0.000000000000000 | 2.64099487417752  | li |

|                    |                    |                    |    |
|--------------------|--------------------|--------------------|----|
| 0.0000000000000000 | 0.0000000000000000 | -2.64099487417752  | li |
| #Li2O              |                    |                    |    |
| 0.0000000000000000 | 0.0000000000000000 | 0.0000000000000000 | o  |
| 0.0000000000000000 | 0.0000000000000000 | 3.07886917104883   | li |
| 0.0000000000000000 | 0.0000000000000000 | -3.07886917104883  | li |
| #Li4C4H12          |                    |                    |    |
| 1.64706365185023   | -1.64706414193258  | 1.64706544369022   | li |
| -1.64706403016091  | 1.64706609392631   | 1.64705887225055   | li |
| -1.64706511498339  | -1.64706283357271  | -1.64706684500640  | li |
| 1.64706611886332   | 1.64706488898669   | -1.64706698536379  | li |
| -2.43039744530168  | -2.43039421024393  | 2.43039371335858   | c  |
| -2.43039481981438  | 2.43039861558535   | -2.43039404610143  | c  |
| 2.43041016795889   | -2.43037962486503  | -2.43040830076453  | c  |
| 2.43039584881608   | 2.43039712925517   | 2.43039442430495   | c  |
| -3.75314966263209  | -3.75314808906104  | 1.42781762772074   | h  |
| -3.75315152314663  | 1.42782582005728   | -3.75315082553213  | h  |
| 3.75314761464945   | -3.75315658904388  | -1.42781372983920  | h  |
| 3.75314887684819   | 1.42782119712603   | 3.75314726754457   | h  |
| 3.75315353972696   | -1.42784583286734  | -3.75312947798914  | h  |
| -1.42781763382581  | 3.75315092168214   | -3.75315637933721  | h  |
| -1.42782024327477  | -3.75314815761710  | 3.75314688009472   | h  |
| 3.75314899897099   | 3.75315138842044   | 1.42781694923781   | h  |
| 1.42781612597795   | -3.75315104845671  | -3.75315272040008  | h  |
| -3.75315006597704  | -1.42781843578250  | 3.75314714040825   | h  |
| 1.42782002306320   | 3.75315047748770   | 3.75314651403628   | h  |
| -3.75316042760865  | 3.75314243091576   | -1.42779552231280  | h  |
| #Li4Cl4            |                    |                    |    |
| 2.74433107302748   | -1.94051594179951  | 0.0000000000000000 | li |
| 0.00000067632057   | 1.94051446095008   | 2.74434044508148   | li |
| -2.74434673087586  | -1.94050438549579  | 0.0000000000000000 | li |
| 0.00000067632057   | 1.94051446095008   | -2.74434044508148  | li |
| 3.45559531815124   | 2.44348827432849   | 0.0000000000000000 | cl |
| -0.00000377172669  | -2.44349841628354  | 3.45558889743391   | cl |
| -3.45557361860438  | 2.44349993543522   | 0.0000000000000000 | cl |
| -0.00000377172669  | -2.44349841628354  | -3.45558889743391  | cl |
| #Li4H4             |                    |                    |    |
| 1.70080534683096   | 1.70080537092335   | 1.70080629791783   | li |
| -1.70080500921405  | 1.70080539807377   | -1.70080575731674  | li |
| -1.70080602667080  | -1.70080602949547  | 1.70080562105870   | li |
| 1.70080538482293   | -1.70080498514297  | -1.70080576838347  | li |
| -1.85949824812399  | 1.85949816528516   | 1.85949815526986   | h  |
| -1.85949848558192  | -1.85949846568449  | -1.85949840131317  | h  |
| 1.85949821284325   | -1.85949826186725  | 1.85949814331282   | h  |
| 1.85949882509361   | 1.85949880790790   | -1.85949829054584  | h  |
| #Li8               |                    |                    |    |
| 2.74131108923626   | 2.74132478269676   | 2.74117649987501   | li |
| -2.74132095967384  | 2.74139733087893   | 2.74123662814823   | li |
| -2.74141505700265  | -2.74140311587089  | 2.74132801066027   | li |
| 2.74142424897969   | -2.74136699425814  | 2.7412852508306    | li |
| 2.74120592621730   | -2.74115999255214  | -2.74129238641303  | li |
| 2.74113282151043   | 2.74114762466293   | -2.74121705828456  | li |
| -2.74113063835797  | 2.74118015543297   | -2.74125140645887  | li |
| -2.74120743090921  | -2.74111979099044  | -2.74126581261013  | li |
| #LiBH4             |                    |                    |    |
| -0.00024869116689  | -0.69457330488353  | 0.0000000000000000 | b  |
| 0.00086758333408   | -2.99344227721830  | 0.0000000000000000 | h  |
| 1.10203755028072   | 0.22558430838791   | -1.90940541026977  | h  |

|                   |                   |                   |    |
|-------------------|-------------------|-------------------|----|
| 1.10203755028072  | 0.22558430838791  | 1.90940541026977  | h  |
| -2.20471760670618 | 0.22450989127912  | 0.00000000000000  | h  |
| 0.00002361397754  | 3.01233707404689  | 0.00000000000000  | li |
| #LiCl             |                   |                   |    |
| 0.00000000000000  | 0.00000000000000  | -1.93849439881658 | li |
| 0.00000000000000  | 0.00000000000000  | 1.93849439881658  | cl |
| #LiF              |                   |                   |    |
| 0.00000000000000  | 0.00000000000000  | -1.48697136026104 | li |
| 0.00000000000000  | 0.00000000000000  | 1.48697136026103  | f  |
| #LiH              |                   |                   |    |
| 0.00000000000000  | 0.00000000000000  | 1.54697769798700  | li |
| 0.00000000000000  | 0.00000000000000  | -1.54697769798700 | h  |
| #LiSLi            |                   |                   |    |
| 0.00000000000000  | 0.00000000000000  | 0.00000000000000  | s  |
| 0.00000000000000  | 0.00000000000000  | 3.94716240337943  | li |
| 0.00000000000000  | 0.00000000000000  | -3.94716240337943 | li |
| #Mg4              |                   |                   |    |
| 2.14509045506480  | -2.14509045506480 | 2.14509045506480  | mg |
| -2.14509045506480 | 2.14509045506480  | 2.14509045506480  | mg |
| -2.14509045506480 | -2.14509045506480 | -2.14509045506480 | mg |
| 2.14509045506480  | 2.14509045506480  | -2.14509045506480 | mg |
| #MgCl2            |                   |                   |    |
| 0.00000000000000  | 0.00000000000000  | 0.00000000000000  | mg |
| 0.00000000000000  | 0.00000000000000  | 4.14223402210192  | cl |
| 0.00000000000000  | 0.00000000000000  | -4.14223402210192 | cl |
| #MgF              |                   |                   |    |
| 0.00000000000000  | 0.00000000000000  | -1.67915451808357 | mg |
| 0.00000000000000  | 0.00000000000000  | 1.67915451808357  | f  |
| #MgF2             |                   |                   |    |
| 0.00000000000000  | 0.00000000000000  | 0.00000000000000  | mg |
| 0.00000000000000  | 0.00000000000000  | 3.32239429304949  | f  |
| 0.00000000000000  | 0.00000000000000  | -3.32239429304949 | f  |
| #MgH2             |                   |                   |    |
| 0.00000000000000  | 0.00000000000000  | 0.00000000000000  | mg |
| 0.00000000000000  | 0.00000000000000  | 3.23157098894782  | h  |
| 0.00000000000000  | 0.00000000000000  | -3.23157098894782 | h  |
| #Na2O             |                   |                   |    |
| 0.00000000000000  | 0.00000000000000  | -0.00125987003817 | o  |
| 3.76616708679694  | 0.00000000000000  | 0.00062993501909  | na |
| -3.76616708679694 | 0.00000000000000  | 0.00062993501909  | na |
| #Na2S             |                   |                   |    |
| 0.00000000000000  | 0.00000000000000  | 0.00000000000000  | s  |
| 0.00000000000000  | 0.00000000000000  | -4.54664766104049 | na |
| 0.00000000000000  | 0.00000000000000  | 4.54664766104049  | na |
| #Na3N             |                   |                   |    |
| 0.00000000000000  | 0.00000000000000  | 0.98846813029527  | n  |
| -1.94602685234149 | 3.37061738114880  | -0.32948937676509 | na |
| -1.94602685234149 | -3.37061738114880 | -0.32948937676509 | na |
| 3.89205370468299  | 0.00000000000000  | -0.32948937676509 | na |
| #Na3P             |                   |                   |    |
| 0.02166950952763  | -0.00927750719924 | 1.85753834100637  | p  |
| 1.53863108521887  | -3.99579517958087 | -0.62708109943298 | na |
| 2.65769485647032  | 3.35118326979984  | -0.62224016723425 | na |
| -4.21799545121683 | 0.65388941698028  | -0.60821707433915 | na |
| #NaCl             |                   |                   |    |
| 0.00000000000000  | 0.00000000000000  | -2.23125548600731 | na |
| 0.00000000000000  | 0.00000000000000  | 2.23125548600731  | cl |

|         |                    |                    |                    |    |
|---------|--------------------|--------------------|--------------------|----|
| #NaF    | 0.0000000000000000 | 0.0000000000000000 | -1.81647944104883  | na |
|         | 0.0000000000000000 | 0.0000000000000000 | 1.81647944104883   | f  |
| #NaH    | 0.0000000000000000 | 0.0000000000000000 | -1.79420308214526  | na |
|         | 0.0000000000000000 | 0.0000000000000000 | 1.79420308214526   | h  |
| #PLi3   | -0.00040508715227  | 1.96231380420593   | 0.0000000000000000 | p  |
|         | 3.47020495828402   | -0.65597305055359  | 0.0000000000000000 | li |
|         | -1.73489993556587  | -0.65317037682617  | 3.00666083679482   | li |
|         | -1.73489993556587  | -0.65317037682617  | -3.00666083679482  | li |
| #RbF    | 0.0000000000000000 | 0.0000000000000000 | -2.29684487633273  | f  |
|         | 0.0000000000000000 | 0.0000000000000000 | 2.29684487633273   | rb |
| #RbH    | 0.0000000000000000 | 0.0000000000000000 | -2.33735012066011  | rb |
|         | 0.0000000000000000 | 0.0000000000000000 | 2.33735012066011   | h  |
| #RbO    | 0.0000000000000000 | 0.0000000000000000 | -2.46235472688576  | o  |
|         | 0.0000000000000000 | 0.0000000000000000 | 2.46235472688576   | rb |
| #SrF    | 0.0000000000000000 | 0.0000000000000000 | -1.95487637299250  | sr |
|         | 0.0000000000000000 | 0.0000000000000000 | 1.95487637299250   | f  |
| #SrF2   | 0.0000000000000000 | 0.0000000000000000 | 1.21686253050211   | sr |
|         | 3.54167198526231   | 0.0000000000000000 | -0.60843126525105  | f  |
|         | -3.54167198526231  | 0.0000000000000000 | -0.60843126525105  | f  |
| #SrH2   | 0.0000000000000000 | 0.0000000000000000 | 1.36780798604125   | sr |
|         | -3.52443250853761  | 0.0000000000000000 | -0.68390399302062  | h  |
|         | 3.52443250853761   | 0.0000000000000000 | -0.68390399302062  | h  |
| #SrO    | 0.0000000000000000 | 0.0000000000000000 | -1.83598401421036  | sr |
|         | 0.0000000000000000 | 0.0000000000000000 | 1.83598401421036   | o  |
| #SrS    | 0.0000000000000000 | 0.0000000000000000 | -2.31673677279564  | sr |
|         | 0.0000000000000000 | 0.0000000000000000 | 2.31673677279564   | s  |
| #B2H6   | 0.0000000000000000 | 0.0000000000000000 | 1.68149280660034   | b  |
|         | 0.0000000000000000 | 0.0000000000000000 | -1.68149280660034  | b  |
|         | 0.0000000000000000 | -1.88412562931544  | 0.0000000000000000 | h  |
|         | 0.0000000000000000 | 1.88412562931544   | 0.0000000000000000 | h  |
|         | 1.99832414844106   | 0.0000000000000000 | 2.79335654905377   | h  |
|         | -1.99832414844106  | 0.0000000000000000 | 2.79335654905377   | h  |
|         | -1.99832414844106  | 0.0000000000000000 | -2.79335654905377  | h  |
|         | 1.99832414844106   | 0.0000000000000000 | -2.79335654905377  | h  |
| #B3N3H6 | 2.75503008971104   | -0.00000323939483  | 0.0000000000000000 | b  |
|         | 1.33708167162979   | 2.31531468226869   | 0.0000000000000000 | n  |
|         | -1.37762869492974  | 2.38537342180479   | 0.0000000000000000 | b  |
|         | -2.67435276602476  | 0.00000211824938   | 0.0000000000000000 | n  |
|         | -1.37764337777651  | -2.38537456910514  | 0.0000000000000000 | b  |
|         | 1.33706851342589   | -2.31531512981732  | 0.0000000000000000 | n  |
|         | 5.05300245977585   | -0.00000804976266  | 0.0000000000000000 | h  |
|         | 2.30183999853162   | 3.98629277576524   | 0.0000000000000000 | h  |
|         | -2.52609075956054  | 4.37610354836293   | 0.0000000000000000 | h  |
|         | -4.60403920406282  | 0.00000416958359   | 0.0000000000000000 | h  |

|                   |                   |                   |   |
|-------------------|-------------------|-------------------|---|
| -2.52610296250991 | -4.37610284086748 | 0.00000000000000  | h |
| 2.30183503179008  | -3.98628688708722 | 0.00000000000000  | h |
| #B4H4             |                   |                   |   |
| 1.13513007545606  | 1.13512970003633  | 1.13512888659479  | b |
| -1.13512170839976 | 1.13512235099020  | -1.13512294487928 | b |
| -1.13512831829025 | -1.13512872380334 | 1.13512812346088  | b |
| 1.13513271243326  | -1.13513209595804 | -1.13513301541142 | b |
| 2.45171101991862  | 2.45170873428443  | 2.45170917853944  | h |
| -2.45171753891449 | 2.45171830786967  | -2.45171888582538 | h |
| -2.45170898165818 | -2.45171133452650 | 2.45171018828927  | h |
| 2.45170273945477  | -2.45170693889277 | -2.45170153076831 | h |
| #BF3              |                   |                   |   |
| 0.00057162011753  | 0.00000112131525  | 0.00000000000000  | b |
| 2.50269790165942  | 0.00000463627076  | 0.00000000000000  | f |
| -1.25162960237501 | 2.16558024460409  | 0.00000000000000  | f |
| -1.25163991940193 | -2.16558600219009 | 0.00000000000000  | f |
| #BH3              |                   |                   |   |
| 0.00000000000000  | 0.00000000000000  | -0.00001716605107 | b |
| 0.00000000000000  | 0.00000000000000  | 2.29252379962527  | h |
| 1.98536152775083  | 0.00000000000000  | -1.14625331603055 | h |
| -1.98536152775083 | 0.00000000000000  | -1.14625331603055 | h |
| #BH3CO            |                   |                   |   |
| -0.00003267004886 | 1.01111329216265  | 0.00000000000000  | b |
| 2.24066059731720  | 1.62213805210289  | 0.00000000000000  | h |
| -1.12023754948246 | 1.62311914581523  | 1.94044267338909  | h |
| -1.12023754948246 | 1.62311914581523  | -1.94044267338909 | h |
| -0.00018198607045 | -1.85414688329676 | 0.00000000000000  | c |
| 0.00002915776702  | -4.02534275259922 | 0.00000000000000  | o |
| #BH3NH3           |                   |                   |   |
| -0.00005391609667 | -0.00000006055366 | 1.59755328544083  | b |
| 0.00003677556503  | -0.00000004984535 | -1.51922811870669 | n |
| -1.12198704238829 | 1.94345823821240  | 2.21019712023369  | h |
| -1.81066670598354 | -0.00000007552669 | -2.23620407950898 | h |
| -1.12200568324154 | -1.94345788468772 | 2.21023739863948  | h |
| 0.90537147089552  | -1.56819423165877 | -2.23633381411281 | h |
| 2.24393364900982  | -0.00000003812768 | 2.21011203996588  | h |
| 0.90537145223968  | 1.56819410218746  | -2.23633383195137 | h |
| #C2H2             |                   |                   |   |
| 0.00000000000000  | 0.00000000000000  | 1.15246217269357  | c |
| 0.00000000000000  | 0.00000000000000  | -1.15237758930046 | c |
| 0.00000000000000  | 0.00000000000000  | 3.19592252631204  | h |
| 0.00000000000000  | 0.00000000000000  | -3.19600710970514 | h |
| #C2H3N            |                   |                   |   |
| 1.88736354706722  | -0.38569072500046 | 0.00000000000000  | n |
| -0.71824807664584 | -0.19471094953120 | -1.22023694426924 | c |
| -0.71824807664584 | -0.19471094953120 | 1.22023694426924  | c |
| 2.62906670020725  | 1.44277863614961  | 0.00000000000000  | h |
| -1.53996704699139 | -0.33383300604337 | -3.10934257471802 | h |
| -1.53996704699139 | -0.33383300604337 | 3.10934257471802  | h |
| #C2H4             |                   |                   |   |
| -0.00000595240645 | -1.26733455985489 | 0.00000000000000  | c |
| -0.00001103692376 | 1.26733990808114  | 0.00000000000000  | c |
| 1.77139591530185  | -2.36353680346697 | 0.00000000000000  | h |
| -1.77135302848125 | -2.36354228611354 | 0.00000000000000  | h |
| 1.77143988920888  | 2.36354006871598  | 0.00000000000000  | h |
| -1.77146578669927 | 2.36353367263826  | 0.00000000000000  | h |
| #C2H6             |                   |                   |   |

|                   |                   |                   |   |
|-------------------|-------------------|-------------------|---|
| -0.00004769714133 | 0.00000349348608  | 1.44636083928208  | c |
| 0.00000804691144  | 0.00000483284596  | -1.44638600827020 | c |
| 0.00000507341384  | 1.94903094277111  | 2.21977150357274  | h |
| -1.68811904618790 | 0.97442869763498  | -2.21944595476968 | h |
| -1.68812247614916 | -0.97443046693153 | 2.21943006405761  | h |
| 0.00000720306362  | -1.94903334377391 | -2.21978760781604 | h |
| 1.68813497191566  | -0.97443316442446 | 2.21950311354087  | h |
| 1.68813392417380  | 0.97442900839179  | -2.21944594959735 | h |
| #C4H4             |                   |                   |   |
| 0.99384594007199  | 0.99384464702096  | 0.99383622488147  | c |
| -0.99383778119390 | 0.99384857359297  | -0.99384786547507 | c |
| -0.99383837692231 | -0.99383758446481 | 0.99383909184982  | c |
| 0.99384393287549  | -0.99383406319256 | -0.99384192088452 | c |
| 2.18053060627208  | 2.18052818251503  | 2.18055255481919  | h |
| -2.18053790501712 | 2.18055083059018  | -2.18055040079725 | h |
| -2.18053792505281 | -2.18054059788475 | 2.18054096602118  | h |
| 2.18053150896658  | -2.18055998817700 | -2.18052865041484 | h |
| #C6H6             |                   |                   |   |
| 2.65617581771435  | -0.00001755566762 | 0.00000000000000  | c |
| 1.32809320450038  | 2.30036580039517  | 0.00000000000000  | c |
| -1.32814289699474 | 2.30032454944275  | 0.00000000000000  | c |
| -2.65616474222357 | -0.00002947176151 | 0.00000000000000  | c |
| -1.32814664832257 | -2.30031670879657 | 0.00000000000000  | c |
| 1.32804572900546  | -2.30030596170580 | 0.00000000000000  | c |
| 4.73697603254869  | -0.00001003497658 | 0.00000000000000  | h |
| 2.36858554692983  | 4.10225225927773  | 0.00000000000000  | h |
| -2.36858598921966 | 4.10217914017551  | 0.00000000000000  | h |
| -4.73684964271648 | -0.00000987434447 | 0.00000000000000  | h |
| -2.36856197133617 | -4.10217066208403 | 0.00000000000000  | h |
| 2.36857556011450  | -4.10226147995460 | 0.00000000000000  | h |
| #CF4              |                   |                   |   |
| 0.00000072798427  | -0.00000084127378 | 0.00000134823270  | c |
| 1.45612263947210  | 1.45612426874410  | 1.45612670863342  | f |
| -1.45612382956586 | 1.45612744820956  | -1.45611634123477 | f |
| -1.45611302972194 | -1.45611774949082 | 1.45611910063923  | f |
| 1.45611349183143  | -1.45613312618904 | -1.45613081627060 | f |
| #CH2O             |                   |                   |   |
| 0.00001136906018  | -0.00680178712325 | 0.00000000000000  | c |
| 0.00001124892632  | -2.29137576741941 | 0.00000000000000  | o |
| -1.79950764336418 | 1.14910699652609  | 0.00000000000000  | h |
| 1.79948502537768  | 1.14907055801657  | 0.00000000000000  | h |
| #CH2O2            |                   |                   |   |
| -0.00257696271985 | -0.00029911539700 | 0.43566389538811  | c |
| 0.91809787651456  | 1.10119962920547  | -1.77030267443462 | o |
| -0.89638419996679 | -1.09806893130047 | -1.78331456460493 | o |
| 1.35822195950510  | -1.13175262110298 | 1.56631140453024  | h |
| -1.37735867333304 | 1.12892103859498  | 1.55164193912118  | h |
| #CH3N             |                   |                   |   |
| -0.51099882579378 | -1.72615900810017 | 0.00000000000000  | n |
| -0.28199635256966 | 0.67673092847568  | 0.00000000000000  | c |
| 1.26548359579527  | -2.55925182755683 | 0.00000000000000  | h |
| 1.54014071938432  | 1.74203610207273  | 0.00000000000000  | h |
| -2.01262913681617 | 1.86664380510858  | 0.00000000000000  | h |
| #CH3OH            |                   |                   |   |
| -0.60943318920949 | 0.23208453617070  | 0.00000000000000  | c |
| -1.40349374228799 | -0.73023655246102 | -1.70457168393205 | h |
| -1.40349374228799 | -0.73023655246102 | 1.70457168393205  | h |

|                   |                   |                   |   |
|-------------------|-------------------|-------------------|---|
| -1.34535487704355 | 2.19364844386480  | 0.00000000000000  | h |
| 2.05720432204887  | 0.37903865616194  | 0.00000000000000  | o |
| 2.70457122878014  | -1.34429853127539 | 0.00000000000000  | h |
| #CH4              |                   |                   |   |
| 0.00000365772543  | -0.00000430204539 | -0.00000303470922 | c |
| 1.20635474089927  | 1.20638206443483  | 1.20635809459961  | h |
| -1.20637417661767 | 1.20636079380735  | -1.20635435342573 | h |
| -1.20635629114801 | -1.20637256903187 | 1.20636439312342  | h |
| 1.20637206914099  | -1.20636598716490 | -1.20636509958807 | h |
| #CO               |                   |                   |   |
| 0.00000000000000  | 0.00000000000000  | -1.07901367410215 | c |
| 0.00000000000000  | 0.00000000000000  | 1.07901367410215  | o |
| #CO2              |                   |                   |   |
| 0.00000000000000  | 0.00000000000000  | 0.00002806040915  | c |
| 0.00000000000000  | 0.00000000000000  | 2.21994735057408  | o |
| 0.00000000000000  | 0.00000000000000  | -2.21997541098322 | o |
| #F2               |                   |                   |   |
| 0.00000000000000  | 0.00000000000000  | -1.33472243762606 | f |
| 0.00000000000000  | 0.00000000000000  | 1.33472243762606  | f |
| #H2               |                   |                   |   |
| 0.00000000000000  | 0.00000000000000  | 0.72490772298399  | h |
| 0.00000000000000  | 0.00000000000000  | -0.72490772298399 | h |
| #H2CO3            |                   |                   |   |
| -0.00000072368405 | 0.22080394668051  | 0.00000000000000  | c |
| -0.00000085983362 | 2.51789433031705  | 0.00000000000000  | o |
| 2.06907082035747  | -1.26682714026337 | 0.00000000000000  | o |
| -2.06907034454166 | -1.26683026979785 | 0.00000000000000  | o |
| 3.50618225374280  | -0.10251893084200 | 0.00000000000000  | h |
| -3.50618114604093 | -0.10252193609435 | 0.00000000000000  | h |
| #H2O              |                   |                   |   |
| -0.00000092153086 | 0.77139067871094  | 0.00000000000000  | o |
| 1.43408493447591  | -0.38569466553748 | 0.00000000000000  | h |
| -1.43408401294505 | -0.38569601317346 | 0.00000000000000  | h |
| #H2O2             |                   |                   |   |
| 1.37391573291828  | -0.11754325013582 | 0.47481512973650  | o |
| -1.37391573291828 | 0.11754325013582  | 0.47481512973650  | o |
| 1.81764940640807  | 1.41027485517298  | -0.47481512973649 | h |
| -1.81764940640807 | -1.41027485517298 | -0.47481512973649 | h |
| #HCN              |                   |                   |   |
| 0.00000000000000  | 0.00000000000000  | -2.10459881646616 | h |
| 0.00000000000000  | 0.00000000000000  | -0.05057148541107 | c |
| 0.00000000000000  | 0.00000000000000  | 2.15517030187723  | n |
| #HF               |                   |                   |   |
| 0.00000000000000  | 0.00000000000000  | 0.88143111896247  | h |
| 0.00000000000000  | 0.00000000000000  | -0.88143111896247 | f |
| #HNC              |                   |                   |   |
| 0.00000000000000  | 0.00000000000000  | -2.02196172790527 | h |
| 0.00000000000000  | 0.00000000000000  | -0.10820520253614 | n |
| 0.00000000000000  | 0.00000000000000  | 2.13016693044140  | c |
| #HNO              |                   |                   |   |
| -1.79661507816673 | 0.48943320881840  | 0.00000000000000  | o |
| 0.47454096973458  | 0.69971484027459  | 0.00000000000000  | n |
| 1.32207410843215  | -1.18914804909299 | 0.00000000000000  | h |
| #HNO2             |                   |                   |   |
| -0.00005991769124 | 0.00467141411420  | 0.00000000000000  | n |
| 0.00050822247803  | -2.00908183598864 | 0.00000000000000  | h |
| 2.08688969332883  | 1.00263775985379  | 0.00000000000000  | o |



|                   |                   |                   |    |
|-------------------|-------------------|-------------------|----|
| -2.08733799811562 | 1.00177266202064  | 0.00000000000000  | o  |
| #HNO3             |                   |                   |    |
| -0.84920495946036 | -0.15764648097179 | 0.00000000000000  | n  |
| -1.28916831029594 | 2.10044345874920  | 0.00000000000000  | o  |
| 1.78029964374549  | -0.83073113266367 | 0.00000000000000  | o  |
| -2.25079424696181 | -1.94859046351144 | 0.00000000000000  | o  |
| 2.60886787297262  | 0.83652461839769  | 0.00000000000000  | h  |
| #N2               |                   |                   |    |
| 0.00000000000000  | 0.00000000000000  | -1.05078974035833 | n  |
| 0.00000000000000  | 0.00000000000000  | 1.05078974035833  | n  |
| #N2H2             |                   |                   |    |
| -1.17672812398851 | 0.92386039472759  | 0.00000000000000  | n  |
| 1.17661864072211  | 0.92396010505874  | 0.00000000000000  | n  |
| -1.95539025873620 | -0.92400022187768 | 0.00000000000000  | h  |
| 1.95549974200260  | -0.92382027790864 | 0.00000000000000  | h  |
| #N2H4             |                   |                   |    |
| 1.34301342554004  | 0.11487732805038  | 0.44262664845470  | n  |
| -1.34301342554004 | -0.11487732805038 | 0.44262664845470  | n  |
| 2.06079980354008  | 0.61078546738212  | -1.30448136798935 | h  |
| -2.06079980354008 | -0.61078546738212 | -1.30448136798935 | h  |
| 2.08747379308132  | -1.63000779480150 | 0.86185471953465  | h  |
| -2.08747379308132 | 1.63000779480150  | 0.86185471953465  | h  |
| #N4               |                   |                   |    |
| 0.97352637877574  | 0.97353427649995  | 0.97350854749399  | n  |
| -0.97347107666161 | 0.97345970934768  | -0.97348952076396 | n  |
| -0.97352288698680 | -0.97351512802877 | 0.97348592757745  | n  |
| 0.97346758487266  | -0.97347885781885 | -0.97350495430747 | n  |
| #NF3              |                   |                   |    |
| -0.00023917863373 | 0.86723125260972  | 0.00000000000000  | n  |
| 2.36152560364088  | -0.29019299685791 | 0.00000000000000  | f  |
| -1.18064321250358 | -0.28851912787590 | 2.04401593693485  | f  |
| -1.18064321250358 | -0.28851912787590 | -2.04401593693485 | f  |
| #NH3              |                   |                   |    |
| -0.00002996273382 | 0.60419573896846  | 0.00000000000000  | n  |
| 1.77459787410351  | -0.20146478753319 | 0.00000000000000  | h  |
| -0.88728395568485 | -0.20136547571764 | 1.53702086353764  | h  |
| -0.88728395568485 | -0.20136547571764 | -1.53702086353764 | h  |
| #NH4F             |                   |                   |    |
| 0.00035295142012  | 0.99586270905472  | 0.00000000000000  | n  |
| 1.79756586681634  | 1.73917600761303  | 0.00000000000000  | h  |
| -0.89974980156668 | 1.73568143900128  | 1.55739131188531  | h  |
| -0.89974980156668 | 1.73568143900128  | -1.55739131188531 | h  |
| 0.00153471995548  | -2.18853841134706 | 0.00000000000000  | h  |
| 0.00004606494142  | -4.01786318332326 | 0.00000000000000  | f  |
| #OF2              |                   |                   |    |
| 0.00000000000000  | 0.00000000000000  | 1.08966458588793  | o  |
| -2.12636045821744 | 0.00000000000000  | -0.54483229294396 | f  |
| 2.12636045821744  | 0.00000000000000  | -0.54483229294396 | f  |
| #Al2O3            |                   |                   |    |
| 0.00000000000000  | 0.00000000000000  | 0.00000000000000  | o  |
| 0.00000000000000  | 0.00000000000000  | -3.20592451951933 | al |
| 0.00000000000000  | 0.00000000000000  | 3.20592451951933  | al |
| 0.00000000000000  | 0.00000000000000  | -6.26442328261665 | o  |
| 0.00000000000000  | 0.00000000000000  | 6.26442328261665  | o  |
| #Al2S3            |                   |                   |    |
| 0.00000000000000  | 0.00000000000000  | 3.16034259123655  | s  |
| -6.05680384209421 | 0.00000000000000  | -2.01213979070925 | s  |

|                    |                    |                    |    |
|--------------------|--------------------|--------------------|----|
| 6.05680384209421   | 0.0000000000000000 | -2.01213979070925  | s  |
| -3.12156733278024  | 0.0000000000000000 | 0.43196849509098   | al |
| 3.12156733278024   | 0.0000000000000000 | 0.43196849509098   | al |
| #AlCl3             |                    |                    |    |
| 0.0000000000000000 | 0.0000000000000000 | 0.0000000000000000 | al |
| 1.98010837147193   | -3.42964830388186  | 0.0000000000000000 | cl |
| 1.98010837147193   | 3.42964830388186   | 0.0000000000000000 | cl |
| -3.96021674294387  | 0.0000000000000000 | 0.0000000000000000 | cl |
| #AlF3              |                    |                    |    |
| 0.0000000000000000 | 0.0000000000000000 | 0.0000000000000000 | al |
| 1.56643211516439   | -2.71314001007231  | 0.0000000000000000 | f  |
| 1.56643211516439   | 2.71314001007231   | 0.0000000000000000 | f  |
| -3.13286423032878  | 0.0000000000000000 | 0.0000000000000000 | f  |
| #AlH3              |                    |                    |    |
| 0.0000000000000000 | 0.0000000000000000 | 0.0000000000000000 | al |
| 1.51111027824900   | -2.61731977776682  | 0.0000000000000000 | h  |
| 1.51111027824900   | 2.61731977776682   | 0.0000000000000000 | h  |
| -3.02222055649801  | 0.0000000000000000 | 0.0000000000000000 | h  |
| #AlN               |                    |                    |    |
| 0.0000000000000000 | 0.0000000000000000 | 1.70183203298110   | n  |
| 0.0000000000000000 | 0.0000000000000000 | -1.70183203298110  | al |
| #CS2               |                    |                    |    |
| 0.0000000000000000 | 0.0000000000000000 | -0.00042370317242  | c  |
| 0.0000000000000000 | 0.0000000000000000 | 2.96976471283164   | s  |
| 0.0000000000000000 | 0.0000000000000000 | -2.96934100965921  | s  |
| #Cl2               |                    |                    |    |
| 0.0000000000000000 | 0.0000000000000000 | 1.94562946845339   | cl |
| 0.0000000000000000 | 0.0000000000000000 | -1.94562946845339  | cl |
| #ClF               |                    |                    |    |
| 0.0000000000000000 | 0.0000000000000000 | -1.58509614282258  | cl |
| 0.0000000000000000 | 0.0000000000000000 | 1.58509614282258   | f  |
| #ClF3              |                    |                    |    |
| -0.00003067860727  | -0.83736782989924  | 0.0000000000000000 | cl |
| -3.32968626746479  | -0.75728391745932  | 0.0000000000000000 | f  |
| 3.32967523209023   | -0.75719934611368  | 0.0000000000000000 | f  |
| 0.00004171398183   | 2.35185109347225   | 0.0000000000000000 | f  |
| #H2SO4             |                    |                    |    |
| -0.00001618652064  | 0.00000532998352   | 0.57726346501965   | s  |
| 2.40449042802622   | 0.00000119792204   | 1.95483853136064   | o  |
| -2.40446876756433  | 0.00000117641825   | 1.95482480979171   | o  |
| -0.00000130197438  | 2.22843215334819   | -1.58826869332215  | o  |
| -0.00000131291374  | -2.22844560147121  | -1.58825020322016  | o  |
| -0.00000143369034  | 3.83405981964557   | -0.65522713489551  | h  |
| -0.00000142536279  | -3.83405407584636  | -0.65518077473415  | h  |
| #H3PO4             |                    |                    |    |
| 0.00025271029759   | 0.00000002775195   | 0.18378624273833   | p  |
| 2.75771513369481   | 0.00000046305733   | -1.18697263987526  | o  |
| -1.38058842041890  | 2.38580178738371   | -1.18704930153066  | o  |
| -1.38058701560059  | -2.38580233754762  | -1.18704935129008  | o  |
| 0.00141162249612   | 0.00000008197607   | 3.01262148875343   | o  |
| 4.05947580693281   | -0.00000015128153  | 0.12202776723928   | h  |
| -2.02883988453177  | 3.51548597828379   | 0.12131791511576   | h  |
| -2.02883995287005  | -3.51548584962367  | 0.12131787884917   | h  |
| #HCP               |                    |                    |    |
| 0.0000000000000000 | 0.0000000000000000 | -2.64853987727355  | p  |
| 0.0000000000000000 | 0.0000000000000000 | 2.35551089579161   | h  |
| 0.0000000000000000 | 0.0000000000000000 | 0.29302898148195   | c  |

|       |                    |                    |                    |    |
|-------|--------------------|--------------------|--------------------|----|
| #HC1  | 0.0000000000000000 | 0.0000000000000000 | -1.22530682104886  | cl |
|       | 0.0000000000000000 | 0.0000000000000000 | 1.22530682104886   | h  |
| #HSH  | -0.00000891346937  | 1.19653856768716   | 0.0000000000000000 | s  |
|       | 1.84307080535555   | -0.59826448731836  | 0.0000000000000000 | h  |
|       | -1.84306189188618  | -0.59827408036881  | 0.0000000000000000 | h  |
| #HSSH | 1.98198459838609   | -0.07543787142517  | 0.90366573347496   | s  |
|       | -1.98198459838609  | 0.07543787142517   | 0.90366573347496   | s  |
|       | 2.42926401991953   | 1.72380811808687   | -0.90366607995143  | h  |
|       | -2.42926401991953  | -1.72380811808687  | -0.90366607995143  | h  |
| #P2   | 0.0000000000000000 | 0.0000000000000000 | 1.81038834147637   | p  |
|       | 0.0000000000000000 | 0.0000000000000000 | -1.81038834147637  | p  |
| #PF3  | 0.00190593228732   | 0.00000637856307   | -1.13522248396255  | p  |
|       | 2.65740159746508   | 0.00000628935462   | 0.38170793256163   | f  |
|       | -1.32964926884328  | 2.29968766474854   | 0.37675740109626   | f  |
|       | -1.32965826090911  | -2.29970033266624  | 0.37675715030465   | f  |
| #PF5  | 0.00093568540199   | 0.00000556340549   | 0.0000000000000000 | p  |
|       | 0.00115403835462   | -3.04805754510344  | 0.0000000000000000 | f  |
|       | 0.00115453827044   | 3.04805857150255   | 0.0000000000000000 | f  |
|       | 3.00853565827311   | -0.00000245516935  | 0.0000000000000000 | f  |
|       | -1.50588996015008  | -0.00000206731762  | 2.60331280562780   | f  |
|       | -1.50588996015008  | -0.00000206731762  | -2.60331280562780  | f  |
| #PH3  | 0.00021868262881   | 0.00000408524970   | -1.13254033248507  | p  |
|       | 2.26639108333582   | 0.00000455950564   | 0.37803102689817   | h  |
|       | -1.13330963847505  | 1.96296552283309   | 0.37726390137846   | h  |
|       | -1.13330012748958  | -1.96297416758843  | 0.37724540420844   | h  |
| #S2   | 0.0000000000000000 | 0.0000000000000000 | -1.82795217547776  | s  |
|       | 0.0000000000000000 | 0.0000000000000000 | 1.82795217547776   | s  |
| #S5   | -1.01219286085597  | 0.91031071217532   | 2.78939529359939   | s  |
|       | 2.56254320877922   | -0.26701145071347  | 2.27262712733185   | s  |
|       | 2.56256180032893   | -0.26700825963793  | -2.27262274065567  | s  |
|       | -1.01216802810249  | 0.91029852260584   | -2.78940508703009  | s  |
|       | -3.10074412014967  | -1.28658952442978  | 0.00000540675450   | s  |
| #SF2  | 0.0000000000000000 | 0.0000000000000000 | 1.32266337773884   | s  |
|       | 2.37880811467657   | 0.0000000000000000 | -0.66133188418768  | f  |
|       | -2.37880811467657  | 0.0000000000000000 | -0.66133188418768  | f  |
| #SF4  | -0.00000226380055  | -0.00002431422764  | 0.84926009844488   | s  |
|       | -3.18886562268367  | -0.00001733471558  | 0.66640784370306   | f  |
|       | 3.18886006659826   | -0.00001733422028  | 0.66642737569287   | f  |
|       | 0.00000390405808   | 2.35445661105741   | -1.09097973125881  | f  |
|       | 0.00000391582787   | -2.35439762789392  | -1.09111558658199  | f  |
| #SF6  | 0.0000000000000000 | 0.0000000000000000 | 0.00000118515990   | s  |
|       | -2.15172851914079  | -2.15172851914079  | -0.00000033099473  | f  |
|       | 0.0000000000000000 | 0.0000000000000000 | 3.04300291311907   | f  |
|       | -2.15172851914079  | 2.15172851914079   | -0.00000033099473  | f  |
|       | 0.0000000000000000 | 0.0000000000000000 | -3.04300276329175  | f  |

|                   |                   |                   |    |
|-------------------|-------------------|-------------------|----|
| 2.15172851914079  | -2.15172851914079 | -0.00000033099473 | f  |
| 2.15172851914079  | 2.15172851914079  | -0.00000033099473 | f  |
| #SiCl4            |                   |                   |    |
| 0.000000000000000 | 0.000000000000000 | 0.000000000000000 | si |
| 2.24180189786400  | -2.24180189786400 | 2.24180189786400  | cl |
| -2.24180189786400 | 2.24180189786400  | 2.24180189786400  | cl |
| -2.24180189786400 | -2.24180189786400 | -2.24180189786400 | cl |
| 2.24180189786400  | 2.24180189786400  | -2.24180189786400 | cl |
| #SiF4             |                   |                   |    |
| 0.000000000000000 | 0.000000000000000 | 0.000000000000000 | si |
| 1.74748733068482  | -1.74748733068482 | 1.74748733068482  | f  |
| -1.74748733068482 | 1.74748733068482  | 1.74748733068482  | f  |
| -1.74748733068482 | -1.74748733068482 | -1.74748733068482 | f  |
| 1.74748733068482  | 1.74748733068482  | -1.74748733068482 | f  |
| #SiH4             |                   |                   |    |
| 0.000000000000000 | 0.000000000000000 | 0.000000000000000 | si |
| 1.63806238513397  | -1.63806238513397 | 1.63806238513397  | h  |
| -1.63806238513397 | 1.63806238513397  | 1.63806238513397  | h  |
| -1.63806238513397 | -1.63806238513397 | -1.63806238513397 | h  |
| 1.63806238513397  | 1.63806238513397  | -1.63806238513397 | h  |
| #SiO2             |                   |                   |    |
| 0.000000000000000 | 0.000000000000000 | 0.000000000000000 | si |
| 0.000000000000000 | 0.000000000000000 | -2.90863957585795 | o  |
| 0.000000000000000 | 0.000000000000000 | 2.90863957585795  | o  |
| #SiS2             |                   |                   |    |
| 0.000000000000000 | 0.000000000000000 | 0.000000000000000 | si |
| 0.000000000000000 | 0.000000000000000 | -3.68153174204543 | s  |
| 0.000000000000000 | 0.000000000000000 | 3.68153174204543  | s  |
| #As4              |                   |                   |    |
| 1.64900717955662  | -1.64900717955662 | 1.64900717955662  | as |
| -1.64900717955662 | 1.64900717955662  | 1.64900717955662  | as |
| -1.64900717955662 | -1.64900717955662 | -1.64900717955662 | as |
| 1.64900717955662  | 1.64900717955662  | -1.64900717955662 | as |
| #As4S4            |                   |                   |    |
| -1.41083883866857 | -1.41083883866857 | 4.46081971940384  | s  |
| 1.41083883866857  | 1.41083883866857  | 4.46081971940384  | s  |
| -1.41083883866857 | 1.41083883866857  | -4.46081971940384 | s  |
| 1.41083883866857  | -1.41083883866857 | -4.46081971940384 | s  |
| 0.000000000000000 | 3.30253054743472  | 0.000000000000000 | as |
| 3.30253054743472  | 0.000000000000000 | 0.000000000000000 | as |
| 0.000000000000000 | -3.30253054743472 | 0.000000000000000 | as |
| -3.30253054743472 | 0.000000000000000 | 0.000000000000000 | as |
| #AsCl3            |                   |                   |    |
| 0.000000000000000 | 0.000000000000000 | 1.45363897308538  | as |
| -1.85326772975506 | 3.20995386796359  | -0.48454632436179 | cl |
| -1.85326772975506 | -3.20995386796359 | -0.48454632436179 | cl |
| 3.70653545951011  | 0.000000000000000 | -0.48454632436179 | cl |
| #AsCl6-           |                   |                   |    |
| 0.000000000000000 | 0.000000000000000 | 0.000000000000000 | as |
| 0.000000000000000 | 4.35128874572739  | 0.000000000000000 | cl |
| 0.000000000000000 | 0.000000000000000 | 4.35128874572739  | cl |
| 4.35128874572739  | 0.000000000000000 | 0.000000000000000 | cl |
| 0.000000000000000 | 0.000000000000000 | -4.35128874572739 | cl |
| -4.35128874572739 | 0.000000000000000 | 0.000000000000000 | cl |
| 0.000000000000000 | -4.35128874572739 | 0.000000000000000 | cl |
| #AsH3             |                   |                   |    |
| 0.000000000000000 | 0.000000000000000 | 1.23244998693740  | as |

|                   |                   |                   |    |
|-------------------|-------------------|-------------------|----|
| -1.20159017904000 | 2.08121523997307  | -0.41081666231247 | h  |
| -1.20159017904000 | -2.08121523997307 | -0.41081666231247 | h  |
| 2.40318035808001  | 0.00000000000000  | -0.41081666231247 | h  |
| #Br2              |                   |                   |    |
| 0.00000000000000  | 0.00000000000000  | -2.20336345967580 | br |
| 0.00000000000000  | 0.00000000000000  | 2.20336345967580  | br |
| #BrCl             |                   |                   |    |
| 0.00000000000000  | 0.00000000000000  | -2.07645102410186 | br |
| 0.00000000000000  | 0.00000000000000  | 2.07645102410186  | cl |
| #BrO4-            |                   |                   |    |
| 0.00000000000000  | 0.00000000000000  | 0.00000000000000  | br |
| 1.80474294078758  | -1.80474294078758 | 1.80474294078758  | o  |
| -1.80474294078758 | 1.80474294078758  | 1.80474294078758  | o  |
| -1.80474294078758 | -1.80474294078758 | -1.80474294078758 | o  |
| 1.80474294078758  | 1.80474294078758  | -1.80474294078758 | o  |
| #GaCl             |                   |                   |    |
| 0.00000000000000  | 0.00000000000000  | -2.11198999351902 | ga |
| 0.00000000000000  | 0.00000000000000  | 2.11198999351902  | cl |
| #GaCl3            |                   |                   |    |
| 0.00000000000000  | 0.00000000000000  | 0.00000000000000  | ga |
| 2.02363708334148  | -3.50504224442794 | 0.00000000000000  | cl |
| 2.02363708334148  | 3.50504224442794  | 0.00000000000000  | cl |
| -4.04727416668296 | 0.00000000000000  | 0.00000000000000  | cl |
| #GaF              |                   |                   |    |
| 0.00000000000000  | 0.00000000000000  | -1.69732010119943 | ga |
| 0.00000000000000  | 0.00000000000000  | 1.69732010119943  | f  |
| #GaF2             |                   |                   |    |
| 0.00000000000000  | 0.00000000000000  | 1.16213096204235  | ga |
| -2.87257490857190 | 0.00000000000000  | -0.58106548102118 | f  |
| 2.87257490857190  | 0.00000000000000  | -0.58106548102118 | f  |
| #GaH3             |                   |                   |    |
| 0.00000000000000  | 0.00000000000000  | 0.00000000000000  | ga |
| 1.49230772481659  | -2.58475279990984 | 0.00000000000000  | h  |
| 1.49230772481659  | 2.58475279990984  | 0.00000000000000  | h  |
| -2.98461544963317 | 0.00000000000000  | 0.00000000000000  | h  |
| #GaO              |                   |                   |    |
| 0.00000000000000  | 0.00000000000000  | -1.61698641616867 | ga |
| 0.00000000000000  | 0.00000000000000  | 1.61698641616867  | o  |
| #GeCl4            |                   |                   |    |
| 0.00000000000000  | 0.00000000000000  | 0.00000000000000  | ge |
| 2.34720419578646  | -2.34720419578646 | 2.34720419578646  | cl |
| -2.34720419578646 | 2.34720419578646  | 2.34720419578646  | cl |
| -2.34720419578646 | -2.34720419578646 | -2.34720419578646 | cl |
| 2.34720419578646  | 2.34720419578646  | -2.34720419578646 | cl |
| #GeF3             |                   |                   |    |
| 0.00000000000000  | 0.00000000000000  | 0.93844457989423  | ge |
| 1.53348366776395  | -2.65607162514423 | -0.31281485996474 | f  |
| 1.53348366776395  | 2.65607162514423  | -0.31281485996474 | f  |
| -3.06696733552790 | 0.00000000000000  | -0.31281485996474 | f  |
| #GeF4             |                   |                   |    |
| 0.00000000000000  | 0.00000000000000  | 0.00000000000000  | ge |
| 1.87482477759343  | -1.87482477759343 | 1.87482477759343  | f  |
| -1.87482477759343 | 1.87482477759343  | 1.87482477759343  | f  |
| -1.87482477759343 | -1.87482477759343 | -1.87482477759343 | f  |
| 1.87482477759343  | 1.87482477759343  | -1.87482477759343 | f  |
| #GeH4             |                   |                   |    |
| 0.00000000000000  | 0.00000000000000  | 0.00000000000000  | ge |

|                   |                   |                   |    |
|-------------------|-------------------|-------------------|----|
| 1.69283500661777  | -1.69283500661777 | 1.69283500661777  | h  |
| -1.69283500661777 | 1.69283500661777  | 1.69283500661777  | h  |
| -1.69283500661777 | -1.69283500661777 | -1.69283500661777 | h  |
| 1.69283500661777  | 1.69283500661777  | -1.69283500661777 | h  |
| #GeO              |                   |                   |    |
| 0.000000000000000 | 0.000000000000000 | -1.55696412775958 | ge |
| 0.000000000000000 | 0.000000000000000 | 1.55696412775958  | o  |
| #GeO2             |                   |                   |    |
| 0.000000000000000 | 0.000000000000000 | 0.000000000000000 | ge |
| 0.000000000000000 | 0.000000000000000 | 3.09562411619127  | o  |
| 0.000000000000000 | 0.000000000000000 | -3.09562411619127 | o  |
| #HBr              |                   |                   |    |
| 0.000000000000000 | 0.000000000000000 | -1.35667371651595 | h  |
| 0.000000000000000 | 0.000000000000000 | 1.35667371651595  | br |
| #HBr3             |                   |                   |    |
| 0.000000000000000 | 0.000000000000000 | 0.22579559169999  | c  |
| 0.000000000000000 | 0.000000000000000 | 2.30613641574210  | h  |
| 1.76507167530612  | -3.05719382063092 | -0.84397733581403 | br |
| 1.76507167530612  | 3.05719382063092  | -0.84397733581403 | br |
| -3.53014335061225 | 0.000000000000000 | -0.84397733581403 | br |
| #Se8              |                   |                   |    |
| 4.73473332107232  | -1.96119075580796 | 1.08203483157154  | se |
| 1.96119075580796  | 4.73473332107232  | 1.08203483157154  | se |
| -4.73473332107232 | 1.96119075580796  | 1.08203483157154  | se |
| -1.96119075580796 | -4.73473332107232 | 1.08203483157154  | se |
| 4.73473332107232  | 1.96119075580796  | -1.08203483157154 | se |
| -1.96119075580796 | 4.73473332107232  | -1.08203483157154 | se |
| -4.73473332107232 | -1.96119075580796 | -1.08203483157154 | se |
| 1.96119075580796  | -4.73473332107232 | -1.08203483157154 | se |
| #SeH2             |                   |                   |    |
| 0.000000000000000 | 0.000000000000000 | 1.31443756714499  | se |
| -1.99442696033084 | 0.000000000000000 | -0.65721878357249 | h  |
| 1.99442696033084  | 0.000000000000000 | -0.65721878357249 | h  |
| #SeO              |                   |                   |    |
| 0.000000000000000 | 0.000000000000000 | -1.58117857273827 | se |
| 0.000000000000000 | 0.000000000000000 | 1.58117857273827  | o  |
| #SeO2             |                   |                   |    |
| 0.000000000000000 | 0.000000000000000 | 1.10091950638887  | se |
| -2.61260008861725 | 0.000000000000000 | -0.55045975319444 | o  |
| 2.61260008861725  | 0.000000000000000 | -0.55045975319444 | o  |
| #I2               |                   |                   |    |
| 0.000000000000000 | 0.000000000000000 | -2.58717910006003 | i  |
| 0.000000000000000 | 0.000000000000000 | 2.58717910006003  | i  |
| #ICl              |                   |                   |    |
| 0.000000000000000 | 0.000000000000000 | -2.27749291163188 | i  |
| 0.000000000000000 | 0.000000000000000 | 2.27749291163189  | cl |
| #IH               |                   |                   |    |
| 0.000000000000000 | 0.000000000000000 | -1.54901575226915 | i  |
| 0.000000000000000 | 0.000000000000000 | 1.54901575226915  | h  |
| #IO4-             |                   |                   |    |
| 0.000000000000000 | 0.000000000000000 | 0.000000000000000 | i  |
| 2.03119023188409  | -2.03119023188409 | 2.03119023188409  | o  |
| -2.03119023188409 | 2.03119023188409  | 2.03119023188409  | o  |
| -2.03119023188409 | -2.03119023188409 | -2.03119023188409 | o  |
| 2.03119023188409  | 2.03119023188409  | -2.03119023188409 | o  |
| #InCl             |                   |                   |    |
| 0.000000000000000 | 0.000000000000000 | -2.28501380453881 | in |

|                    |                    |                    |    |
|--------------------|--------------------|--------------------|----|
| 0.0000000000000000 | 0.0000000000000000 | 2.28501380453881   | cl |
| #InCl3             |                    |                    |    |
| 0.0000000000000000 | 0.0000000000000000 | 0.0000000000000000 | in |
| -2.18888514352907  | 3.79126028052504   | 0.0000000000000000 | cl |
| -2.18888514352907  | -3.79126028052504  | 0.0000000000000000 | cl |
| 4.37777028705814   | 0.0000000000000000 | 0.0000000000000000 | cl |
| #InH               |                    |                    |    |
| 0.0000000000000000 | 0.0000000000000000 | -1.77323971157117  | in |
| 0.0000000000000000 | 0.0000000000000000 | 1.77323971157117   | h  |
| #InH3              |                    |                    |    |
| 0.0000000000000000 | 0.0000000000000000 | 0.0000000000000000 | in |
| -1.65719731255026  | 2.87034994350365   | 0.0000000000000000 | h  |
| -1.65719731255026  | -2.87034994350365  | 0.0000000000000000 | h  |
| 3.31439462510052   | 0.0000000000000000 | 0.0000000000000000 | h  |
| #InO               |                    |                    |    |
| 0.0000000000000000 | 0.0000000000000000 | -1.77046376816122  | in |
| 0.0000000000000000 | 0.0000000000000000 | 1.77046376816122   | o  |
| #SbCl6-            |                    |                    |    |
| 0.0000000000000000 | 0.0000000000000000 | 0.0000000000000000 | sb |
| 0.0000000000000000 | 4.64447503829980   | 0.0000000000000000 | cl |
| 0.0000000000000000 | 0.0000000000000000 | 4.64447503829980   | cl |
| 4.64447503829980   | 0.0000000000000000 | 0.0000000000000000 | cl |
| 0.0000000000000000 | 0.0000000000000000 | -4.64447503829980  | cl |
| -4.64447503829980  | 0.0000000000000000 | 0.0000000000000000 | cl |
| 0.0000000000000000 | -4.64447503829980  | 0.0000000000000000 | cl |
| #SbF               |                    |                    |    |
| 0.0000000000000000 | 0.0000000000000000 | -1.86318815100045  | sb |
| 0.0000000000000000 | 0.0000000000000000 | 1.86318815100045   | f  |
| #SbF3              |                    |                    |    |
| 0.0000000000000000 | 0.0000000000000000 | 1.41635010067847   | sb |
| -1.57661128992144  | 2.73077085793065   | -0.47211670022616  | f  |
| -1.57661128992144  | -2.73077085793065  | -0.47211670022616  | f  |
| 3.15322257984289   | 0.0000000000000000 | -0.47211670022616  | f  |
| #SbH3              |                    |                    |    |
| 0.0000000000000000 | 0.0000000000000000 | 1.40288124678412   | sb |
| 1.34916589534128   | -2.33682387857025  | -0.46762708226138  | h  |
| 1.34916589534128   | 2.33682387857025   | -0.46762708226138  | h  |
| -2.69833179068256  | 0.0000000000000000 | -0.46762708226138  | h  |
| #SbO2              |                    |                    |    |
| 0.0000000000000000 | 0.0000000000000000 | 1.18120858212824   | sb |
| 3.08998758817836   | 0.0000000000000000 | -0.59060429106412  | o  |
| -3.08998758817836  | 0.0000000000000000 | -0.59060429106412  | o  |
| #SnF3              |                    |                    |    |
| 0.0000000000000000 | 0.0000000000000000 | 1.07456818814013   | sn |
| 1.71243475756358   | -2.96602400474702  | -0.35818939604671  | f  |
| 1.71243475756358   | 2.96602400474702   | -0.35818939604671  | f  |
| -3.42486951512717  | 0.0000000000000000 | -0.35818939604671  | f  |
| #SnH4              |                    |                    |    |
| 0.0000000000000000 | 0.0000000000000000 | 0.0000000000000000 | sn |
| 1.89044177023958   | -1.89044177023958  | 1.89044177023958   | h  |
| -1.89044177023958  | 1.89044177023958   | 1.89044177023958   | h  |
| -1.89044177023958  | -1.89044177023958  | -1.89044177023958  | h  |
| 1.89044177023958   | 1.89044177023958   | -1.89044177023958  | h  |
| #SnO               |                    |                    |    |
| 0.0000000000000000 | 0.0000000000000000 | -1.76719363698803  | sn |
| 0.0000000000000000 | 0.0000000000000000 | 1.76719363698803   | o  |
| #SnO2              |                    |                    |    |

|                    |                    |                    |    |
|--------------------|--------------------|--------------------|----|
| 0.0000000000000000 | 0.0000000000000000 | 0.00163548812459   | sn |
| -3.51460840178293  | 0.0000000000000000 | -0.00081774406230  | o  |
| 3.51460840178293   | 0.0000000000000000 | -0.00081774406230  | o  |
| #TeF3              |                    |                    |    |
| 0.0000000000000000 | 0.0000000000000000 | 0.35475666747305   | te |
| -1.87725312652868  | 3.25149779381520   | -0.11825222249101  | f  |
| -1.87725312652868  | -3.25149779381520  | -0.11825222249101  | f  |
| 3.75450625305736   | 0.0000000000000000 | -0.11825222249101  | f  |
| #TeH2              |                    |                    |    |
| 0.0000000000000000 | 0.0000000000000000 | 1.49820193039170   | te |
| -2.24906865611118  | 0.0000000000000000 | -0.74910096519585  | h  |
| 2.24906865611118   | 0.0000000000000000 | -0.74910096519585  | h  |
| #TeO               |                    |                    |    |
| 0.0000000000000000 | 0.0000000000000000 | -1.77896181226445  | te |
| 0.0000000000000000 | 0.0000000000000000 | 1.77896181226445   | o  |
| #TeO2              |                    |                    |    |
| 0.0000000000000000 | 0.0000000000000000 | 1.29984292231352   | te |
| -2.88498675314837  | 0.0000000000000000 | -0.64992146115676  | o  |
| 2.88498675314837   | 0.0000000000000000 | -0.64992146115676  | o  |
| #XeF2              |                    |                    |    |
| 0.0000000000000000 | 0.0000000000000000 | 0.0000000000000000 | xe |
| 0.0000000000000000 | 0.0000000000000000 | 3.90757878328295   | f  |
| 0.0000000000000000 | 0.0000000000000000 | -3.90757878328295  | f  |
| #XeF4              |                    |                    |    |
| 0.0000000000000000 | 0.0000000000000000 | 0.0000000000000000 | xe |
| 2.72236103703447   | -2.72236103703447  | 0.0000000000000000 | f  |
| 2.72236103703447   | 2.72236103703447   | 0.0000000000000000 | f  |
| -2.72236103703447  | 2.72236103703447   | 0.0000000000000000 | f  |
| -2.72236103703447  | -2.72236103703447  | 0.0000000000000000 | f  |
| #XeOF4             |                    |                    |    |
| 0.0000000000000000 | 0.0000000000000000 | -0.39099828949089  | xe |
| 0.0000000000000000 | 0.0000000000000000 | 3.04665434896357   | o  |
| 2.70138310369918   | -2.70138310369918  | -0.66391401486817  | f  |
| 2.70138310369918   | 2.70138310369918   | -0.66391401486817  | f  |
| -2.70138310369918  | 2.70138310369918   | -0.66391401486817  | f  |
| -2.70138310369918  | -2.70138310369918  | -0.66391401486817  | f  |
| #BiCl6-            |                    |                    |    |
| 0.0000000000000000 | 0.0000000000000000 | 0.0000000000000000 | bi |
| 0.0000000000000000 | 4.82554937284918   | 0.0000000000000000 | cl |
| 0.0000000000000000 | 0.0000000000000000 | 4.82554937284918   | cl |
| 0.0000000000000000 | -4.82554937284918  | 0.0000000000000000 | cl |
| 0.0000000000000000 | 0.0000000000000000 | -4.82554937284918  | cl |
| 4.82554937284918   | 0.0000000000000000 | 0.0000000000000000 | cl |
| -4.82554937284918  | 0.0000000000000000 | 0.0000000000000000 | cl |
| #BiF               |                    |                    |    |
| 0.0000000000000000 | 0.0000000000000000 | -1.93137769997131  | bi |
| 0.0000000000000000 | 0.0000000000000000 | 1.93137769997131   | f  |
| #BiF3              |                    |                    |    |
| 0.0000000000000000 | 0.0000000000000000 | 1.46232798160630   | bi |
| 1.63662897536318   | -2.83472453846842  | -0.48744266053543  | f  |
| 1.63662897536318   | 2.83472453846842   | -0.48744266053543  | f  |
| -3.27325795072636  | 0.0000000000000000 | -0.48744266053543  | f  |
| #BiH3              |                    |                    |    |
| 0.0000000000000000 | 0.0000000000000000 | 1.47386771700502   | bi |
| 1.40843659350503   | -2.43948373918995  | -0.49128923900167  | h  |
| 1.40843659350503   | 2.43948373918995   | -0.49128923900167  | h  |
| -2.81687318701006  | 0.0000000000000000 | -0.49128923900167  | h  |



|        |                    |                    |                    |    |
|--------|--------------------|--------------------|--------------------|----|
| #BiO2  | 0.0000000000000000 | 0.0000000000000000 | 1.37289088296138   | bi |
|        | -3.15041062335303  | 0.0000000000000000 | -0.68644544148069  | o  |
|        | 3.15041062335303   | 0.0000000000000000 | -0.68644544148069  | o  |
| #PbF3  | 0.0000000000000000 | 0.0000000000000000 | 1.10329818701537   | pb |
|        | -1.78036242435008  | 3.08367817486085   | -0.36776606233846  | f  |
|        | -1.78036242435008  | -3.08367817486085  | -0.36776606233846  | f  |
|        | 3.56072484870017   | 0.0000000000000000 | -0.36776606233846  | f  |
| #PbH4  | 0.0000000000000000 | 0.0000000000000000 | 0.0000000000000000 | pb |
|        | 1.91301550123300   | -1.91301550123300  | 1.91301550123300   | h  |
|        | -1.91301550123300  | 1.91301550123300   | 1.91301550123300   | h  |
|        | -1.91301550123300  | -1.91301550123300  | -1.91301550123300  | h  |
|        | 1.91301550123300   | 1.91301550123300   | -1.91301550123300  | h  |
| #PbO   | 0.0000000000000000 | 0.0000000000000000 | -1.80754257937630  | pb |
|        | 0.0000000000000000 | 0.0000000000000000 | 1.80754257937630   | o  |
| #PbO2  | 0.0000000000000000 | 0.0000000000000000 | 0.0000000000000000 | pb |
|        | 0.0000000000000000 | 0.0000000000000000 | 3.61357863592328   | o  |
|        | 0.0000000000000000 | 0.0000000000000000 | -3.61357863592328  | o  |
| #TlCl  | 0.0000000000000000 | 0.0000000000000000 | -2.38342001986092  | tl |
|        | 0.0000000000000000 | 0.0000000000000000 | 2.38342001986092   | cl |
| #TlCl3 | 0.0000000000000000 | 0.0000000000000000 | -0.01443837177572  | tl |
|        | -2.26117878730255  | 3.91647654460500   | 0.00481279059057   | cl |
|        | -2.26117878730255  | -3.91647654460500  | 0.00481279059057   | cl |
|        | 4.52235757460510   | 0.0000000000000000 | 0.00481279059057   | cl |
| #TlH   | 0.0000000000000000 | 0.0000000000000000 | -1.81347675018980  | tl |
|        | 0.0000000000000000 | 0.0000000000000000 | 1.81347675018980   | h  |
| #TlH3  | 0.0000000000000000 | 0.0000000000000000 | 0.0000000000000000 | tl |
|        | -1.64536913789863  | 2.84986294404622   | 0.0000000000000000 | h  |
|        | -1.64536913789863  | -2.84986294404622  | 0.0000000000000000 | h  |
|        | 3.29073827579725   | 0.0000000000000000 | 0.0000000000000000 | h  |
| #TlO   | 0.0000000000000000 | 0.0000000000000000 | -1.81795601245970  | tl |
|        | 0.0000000000000000 | 0.0000000000000000 | 1.81795601245970   | o  |
| #CoCl3 | 0.0000000000000000 | 0.0000000000000000 | 0.0000000000000000 | co |
|        | 2.00502719350387   | -3.47280896970594  | 0.0000000000000000 | cl |
|        | 2.00502719350387   | 3.47280896970594   | 0.0000000000000000 | cl |
|        | -4.01005438700775  | 0.0000000000000000 | 0.0000000000000000 | cl |
| #CoF2  | 0.0000000000000000 | 0.0000000000000000 | -0.01591379082412  | co |
|        | 3.26355789294746   | 0.0000000000000000 | 0.00795689541206   | f  |
|        | -3.26355789294746  | 0.0000000000000000 | 0.00795689541206   | f  |
| #CoF3  | 0.0000000000000000 | 0.0000000000000000 | 0.0000000000000000 | co |
|        | 1.65123154872552   | -2.86001693745324  | 0.0000000000000000 | f  |
|        | 1.65123154872552   | 2.86001693745324   | 0.0000000000000000 | f  |
|        | -3.30246309745104  | 0.0000000000000000 | 0.0000000000000000 | f  |
| #CrCO6 | 0.0000000000000000 | 0.0000000000000000 | 0.0000000000000000 | cr |

|                    |                    |                    |    |
|--------------------|--------------------|--------------------|----|
| 0.0000000000000000 | 3.59171681854581   | 0.0000000000000000 | c  |
| 0.0000000000000000 | 0.0000000000000000 | 3.59171681854581   | c  |
| 3.59171681854581   | 0.0000000000000000 | 0.0000000000000000 | c  |
| 0.0000000000000000 | 0.0000000000000000 | -3.59171681854581  | c  |
| -3.59171681854581  | 0.0000000000000000 | 0.0000000000000000 | c  |
| 0.0000000000000000 | -3.59171681854581  | 0.0000000000000000 | c  |
| 0.0000000000000000 | 5.77973936611907   | 0.0000000000000000 | o  |
| 0.0000000000000000 | 0.0000000000000000 | 5.77973936611907   | o  |
| 5.77973936611907   | 0.0000000000000000 | 0.0000000000000000 | o  |
| 0.0000000000000000 | 0.0000000000000000 | -5.77973936611907  | o  |
| -5.77973936611907  | 0.0000000000000000 | 0.0000000000000000 | o  |
| 0.0000000000000000 | -5.77973936611907  | 0.0000000000000000 | o  |
| #CrCl3             |                    |                    |    |
| 0.0000000000000000 | 0.0000000000000000 | 0.0000000000000000 | cr |
| 2.02495084056461   | -3.50731773868720  | 0.0000000000000000 | cl |
| 2.02495084056461   | 3.50731773868720   | 0.0000000000000000 | cl |
| -4.04990168112921  | 0.0000000000000000 | 0.0000000000000000 | cl |
| #CrF3              |                    |                    |    |
| 0.0000000000000000 | 0.0000000000000000 | 0.0000000000000000 | cr |
| 1.63137792162153   | -2.82562944659461  | 0.0000000000000000 | f  |
| 1.63137792162153   | 2.82562944659461   | 0.0000000000000000 | f  |
| -3.26275584324306  | 0.0000000000000000 | 0.0000000000000000 | f  |
| #CrO3              |                    |                    |    |
| 0.0000000000000000 | 0.0000000000000000 | 0.0000000000000000 | cr |
| -1.50063115995876  | 2.59916941246959   | 0.0000000000000000 | o  |
| -1.50063115995876  | -2.59916941246959  | 0.0000000000000000 | o  |
| 3.00126231991752   | 0.0000000000000000 | 0.0000000000000000 | o  |
| #Cu2               |                    |                    |    |
| 0.0000000000000000 | 0.0000000000000000 | -2.07387116344728  | cu |
| 0.0000000000000000 | 0.0000000000000000 | 2.07387116344728   | cu |
| #Cu2O              |                    |                    |    |
| 0.0000000000000000 | 0.0000000000000000 | 1.63312192704579   | o  |
| 2.28854347532692   | 0.0000000000000000 | -0.81656096352289  | cu |
| -2.28854347532692  | 0.0000000000000000 | -0.81656096352289  | cu |
| #Cu2S              |                    |                    |    |
| 0.0000000000000000 | 0.0000000000000000 | 2.19080233145777   | s  |
| -2.28384138036123  | 0.0000000000000000 | -1.09540116572889  | cu |
| 2.28384138036123   | 0.0000000000000000 | -1.09540116572889  | cu |
| #CuCN              |                    |                    |    |
| 0.0000000000000000 | 0.0000000000000000 | -3.01968451426437  | cu |
| 0.0000000000000000 | 0.0000000000000000 | 0.39611548720036   | c  |
| 0.0000000000000000 | 0.0000000000000000 | 2.62356902706402   | n  |
| #CuCl              |                    |                    |    |
| 0.0000000000000000 | 0.0000000000000000 | -1.95954303758138  | cu |
| 0.0000000000000000 | 0.0000000000000000 | 1.95954303758138   | cl |
| #CuF               |                    |                    |    |
| 0.0000000000000000 | 0.0000000000000000 | -1.64676654637877  | cu |
| 0.0000000000000000 | 0.0000000000000000 | 1.64676654637877   | f  |
| #CuH               |                    |                    |    |
| 0.0000000000000000 | 0.0000000000000000 | -1.37926640891550  | cu |
| 0.0000000000000000 | 0.0000000000000000 | 1.37926640891550   | h  |
| #FeCO5             |                    |                    |    |
| 0.0000000000000000 | 0.0000000000000000 | 0.0000000000000000 | fe |
| 1.70357480283978   | -2.95067811301262  | 0.0000000000000000 | c  |
| 1.70357480283978   | 2.95067811301262   | 0.0000000000000000 | c  |
| -3.40714960567955  | 0.0000000000000000 | 0.0000000000000000 | c  |
| 0.0000000000000000 | 0.0000000000000000 | 3.40816318478371   | c  |

|                    |                    |                    |    |
|--------------------|--------------------|--------------------|----|
| 0.0000000000000000 | 0.0000000000000000 | -3.40816318478371  | c  |
| 2.79922085086665   | -4.84839273530721  | 0.0000000000000000 | o  |
| 2.79922085086665   | 4.84839273530721   | 0.0000000000000000 | o  |
| -5.59844170173329  | 0.0000000000000000 | 0.0000000000000000 | o  |
| 0.0000000000000000 | 0.0000000000000000 | 5.59447063964439   | o  |
| 0.0000000000000000 | 0.0000000000000000 | -5.59447063964439  | o  |
| #FeF2              |                    |                    |    |
| 0.0000000000000000 | 0.0000000000000000 | 0.0000000000000000 | fe |
| 3.29988416615965   | 0.0000000000000000 | 0.0000000000000000 | f  |
| -3.29988416615965  | 0.0000000000000000 | 0.0000000000000000 | f  |
| #FeF3              |                    |                    |    |
| 0.0000000000000000 | 0.0000000000000000 | 0.0000000000000000 | fe |
| 1.67360598116772   | -2.89877059123365  | 0.0000000000000000 | f  |
| 1.67360598116772   | 2.89877059123365   | 0.0000000000000000 | f  |
| -3.34721196233544  | 0.0000000000000000 | 0.0000000000000000 | f  |
| #FeO               |                    |                    |    |
| -0.66907143281002  | 0.0000000000000000 | 0.0000000000000000 | fe |
| 2.33556505384199   | 0.0000000000000000 | 0.0000000000000000 | o  |
| #Ferrocen          |                    |                    |    |
| 0.0000000000000000 | 0.0000000000000000 | 0.0000000000000000 | fe |
| 2.31561104541701   | 0.0000000000000000 | 3.09927116392114   | c  |
| 0.71556316539619   | 2.20227697394888   | 3.09927116392114   | c  |
| -1.87336868810470  | 1.36108202254167   | 3.09927116392114   | c  |
| -1.87336868810470  | -1.36108202254167  | 3.09927116392114   | c  |
| 0.71556316539619   | -2.20227697394888  | 3.09927116392114   | c  |
| 2.31561104541701   | 0.0000000000000000 | -3.09927116392114  | c  |
| 0.71556316539619   | -2.20227697394888  | -3.09927116392114  | c  |
| -1.87336868810470  | -1.36108202254167  | -3.09927116392114  | c  |
| -1.87336868810470  | 1.36108202254167   | -3.09927116392114  | c  |
| 0.71556316539619   | 2.20227697394888   | -3.09927116392114  | c  |
| 4.38900985665904   | 0.0000000000000000 | 3.08518706538327   | h  |
| 1.35627863418680   | 4.17419642425924   | 3.08518706538327   | h  |
| -3.55078356251632  | 2.57979526591049   | 3.08518706538327   | h  |
| -3.55078356251632  | -2.57979526591049  | 3.08518706538327   | h  |
| 1.35627863418680   | -4.17419642425924  | 3.08518706538327   | h  |
| 4.38900985665904   | 0.0000000000000000 | -3.08518706538327  | h  |
| 1.35627863418680   | -4.17419642425924  | -3.08518706538327  | h  |
| -3.55078356251632  | -2.57979526591049  | -3.08518706538327  | h  |
| -3.55078356251632  | 2.57979526591049   | -3.08518706538327  | h  |
| 1.35627863418680   | 4.17419642425924   | -3.08518706538327  | h  |
| #MnF2              |                    |                    |    |
| 0.0000000000000000 | 0.0000000000000000 | 0.0000000000000000 | mn |
| 0.0000000000000000 | 0.0000000000000000 | 3.36165918231541   | f  |
| 0.0000000000000000 | 0.0000000000000000 | -3.36165918231541  | f  |
| #MnO               |                    |                    |    |
| 0.0000000000000000 | 0.0000000000000000 | -1.52065965443162  | mn |
| 0.0000000000000000 | 0.0000000000000000 | 1.52065965443162   | o  |
| #MnO2              |                    |                    |    |
| 0.0000000000000000 | 0.0000000000000000 | 0.91350357143973   | mn |
| 2.66795187804954   | 0.0000000000000000 | -0.45675178571986  | o  |
| -2.66795187804954  | 0.0000000000000000 | -0.45675178571986  | o  |
| #MnO3F             |                    |                    |    |
| 0.0000000000000000 | 0.0000000000000000 | -0.07330413800993  | mn |
| 0.0000000000000000 | 0.0000000000000000 | 3.16649627047248   | f  |
| 1.40721736620792   | -2.43737197556538  | -1.03106404415419  | o  |
| 1.40721736620792   | 2.43737197556538   | -1.03106404415419  | o  |
| -2.81443473241584  | 0.0000000000000000 | -1.03106404415419  | o  |

|        |                    |                    |                    |    |
|--------|--------------------|--------------------|--------------------|----|
| #MnO4- | 0.0000000000000000 | 0.0000000000000000 | 0.0000000000000000 | mn |
|        | 1.75938547049818   | -1.75938547049818  | 1.75938547049818   | o  |
|        | -1.75938547049818  | 1.75938547049818   | 1.75938547049818   | o  |
|        | -1.75938547049818  | -1.75938547049818  | -1.75938547049818  | o  |
|        | 1.75938547049818   | 1.75938547049818   | -1.75938547049818  | o  |
| #MnS   | 0.0000000000000000 | 0.0000000000000000 | -1.92619713055598  | mn |
|        | 0.0000000000000000 | 0.0000000000000000 | 1.92619713055598   | s  |
| #NiCO4 | 0.0000000000000000 | 0.0000000000000000 | 0.0000000000000000 | ni |
|        | 1.98326378231725   | -1.98326378231725  | 1.98326378231725   | c  |
|        | -1.98326378231725  | 1.98326378231725   | 1.98326378231725   | c  |
|        | -1.98326378231725  | -1.98326378231725  | -1.98326378231725  | c  |
|        | 1.98326378231725   | 1.98326378231725   | -1.98326378231725  | c  |
|        | 3.24273654096679   | -3.24273654096679  | 3.24273654096679   | o  |
|        | -3.24273654096679  | 3.24273654096679   | 3.24273654096679   | o  |
|        | -3.24273654096679  | -3.24273654096679  | -3.24273654096679  | o  |
|        | 3.24273654096679   | 3.24273654096679   | -3.24273654096679  | o  |
| #NiCl2 | 0.0000000000000000 | 0.0000000000000000 | 0.00232084864856   | ni |
|        | -3.96670138124145  | 0.0000000000000000 | -0.00116042432428  | cl |
|        | 3.96670138124145   | 0.0000000000000000 | -0.00116042432428  | cl |
| #NiF2  | 0.0000000000000000 | 0.0000000000000000 | 0.0000000000000000 | ni |
|        | 0.0000000000000000 | 0.0000000000000000 | -3.26603962131760  | f  |
|        | 0.0000000000000000 | 0.0000000000000000 | 3.26603962131760   | f  |
| #NiF3  | 0.0000000000000000 | 0.0000000000000000 | 0.00152306552660   | ni |
|        | -1.66351766562508  | 2.88129711615101   | -0.00050768850887  | f  |
|        | -1.66351766562508  | -2.88129711615101  | -0.00050768850887  | f  |
|        | 3.32703533125016   | 0.0000000000000000 | -0.00050768850887  | f  |
| #NiO   | 0.0000000000000000 | 0.0000000000000000 | -1.51749092920855  | ni |
|        | 0.0000000000000000 | 0.0000000000000000 | 1.51749092920855   | o  |
| #NiS   | 0.0000000000000000 | 0.0000000000000000 | -1.85681514730456  | ni |
|        | 0.0000000000000000 | 0.0000000000000000 | 1.85681514730456   | s  |
| #ScCl3 | 0.0000000000000000 | 0.0000000000000000 | 0.0000000000000000 | sc |
|        | 2.15416668810895   | -3.73112615177708  | 0.0000000000000000 | cl |
|        | 2.15416668810895   | 3.73112615177708   | 0.0000000000000000 | cl |
|        | -4.30833337621790  | 0.0000000000000000 | 0.0000000000000000 | cl |
| #ScF3  | 0.0000000000000000 | 0.0000000000000000 | 0.0000000000000000 | sc |
|        | 1.73202055035891   | -2.99994759297505  | 0.0000000000000000 | f  |
|        | 1.73202055035891   | 2.99994759297505   | 0.0000000000000000 | f  |
|        | -3.46404110071783  | 0.0000000000000000 | 0.0000000000000000 | f  |
| #ScH3  | 0.0000000000000000 | 0.0000000000000000 | 0.0000000000000000 | sc |
|        | 1.71347214324408   | -2.96782080945268  | 0.0000000000000000 | h  |
|        | 1.71347214324408   | 2.96782080945268   | 0.0000000000000000 | h  |
|        | -3.42694428648816  | 0.0000000000000000 | 0.0000000000000000 | h  |
| #ScO   | 0.0000000000000000 | 0.0000000000000000 | -1.57175591846256  | sc |
|        | 0.0000000000000000 | 0.0000000000000000 | 1.57175591846256   | o  |
| #TiCO4 |                    |                    |                    |    |

|                    |                    |                    |    |
|--------------------|--------------------|--------------------|----|
| 0.0000000000000000 | 0.0000000000000000 | 0.0000000000000000 | ti |
| 2.25209609785139   | -2.25209609785139  | 2.25209609785139   | c  |
| -2.25209609785139  | 2.25209609785139   | 2.25209609785139   | c  |
| -2.25209609785139  | -2.25209609785139  | -2.25209609785139  | c  |
| 2.25209609785139   | 2.25209609785139   | -2.25209609785139  | c  |
| 3.52294080235074   | -3.52294080235074  | 3.52294080235074   | o  |
| -3.52294080235074  | 3.52294080235074   | 3.52294080235074   | o  |
| -3.52294080235074  | -3.52294080235074  | -3.52294080235074  | o  |
| 3.52294080235074   | 3.52294080235074   | -3.52294080235074  | o  |
| #TiCl4             |                    |                    |    |
| 0.0000000000000000 | 0.0000000000000000 | 0.0000000000000000 | ti |
| 2.38225918250055   | -2.38225918250055  | 2.38225918250055   | cl |
| -2.38225918250055  | 2.38225918250055   | 2.38225918250055   | cl |
| -2.38225918250055  | -2.38225918250055  | -2.38225918250055  | cl |
| 2.38225918250055   | 2.38225918250055   | -2.38225918250055  | cl |
| #TiF3              |                    |                    |    |
| 0.0000000000000000 | 0.0000000000000000 | 0.0000000000000000 | ti |
| 1.67141378359608   | -2.89497359365934  | 0.0000000000000000 | f  |
| 1.67141378359608   | 2.89497359365934   | 0.0000000000000000 | f  |
| -3.34282756719215  | 0.0000000000000000 | 0.0000000000000000 | f  |
| #TiF4              |                    |                    |    |
| 0.0000000000000000 | 0.0000000000000000 | 0.0000000000000000 | ti |
| 1.91049002205680   | -1.91049002205680  | 1.91049002205680   | f  |
| -1.91049002205680  | 1.91049002205680   | 1.91049002205680   | f  |
| -1.91049002205680  | -1.91049002205680  | -1.91049002205680  | f  |
| 1.91049002205680   | 1.91049002205680   | -1.91049002205680  | f  |
| #TiH4              |                    |                    |    |
| 0.0000000000000000 | 0.0000000000000000 | 0.0000000000000000 | ti |
| 1.85401673992524   | -1.85401673992524  | 1.85401673992524   | h  |
| -1.85401673992524  | 1.85401673992524   | 1.85401673992524   | h  |
| -1.85401673992524  | -1.85401673992524  | -1.85401673992524  | h  |
| 1.85401673992524   | 1.85401673992524   | -1.85401673992524  | h  |
| #TiO               |                    |                    |    |
| 0.0000000000000000 | 0.0000000000000000 | -1.52666508702031  | ti |
| 0.0000000000000000 | 0.0000000000000000 | 1.52666508702031   | o  |
| #TiO2              |                    |                    |    |
| 0.0000000000000000 | 0.0000000000000000 | 1.20428895304113   | ti |
| -2.52745691819368  | 0.0000000000000000 | -0.60214447652056  | o  |
| 2.52745691819368   | 0.0000000000000000 | -0.60214447652056  | o  |
| #TiS2              |                    |                    |    |
| 0.0000000000000000 | 0.0000000000000000 | 1.47408703528939   | ti |
| -3.26474084717958  | 0.0000000000000000 | -0.73704351764470  | s  |
| 3.26474084717958   | 0.0000000000000000 | -0.73704351764470  | s  |
| #VH5               |                    |                    |    |
| 0.19112681055705   | 0.02226992514811   | -0.53930273355572  | v  |
| 1.21909073594429   | 0.14802719321707   | -3.48934725444155  | h  |
| 1.35539695757176   | -1.88711320691551  | 1.52413775854092   | h  |
| 1.36313902267154   | 1.74011620101324   | 1.68211209473418   | h  |
| -2.05809542406512  | 1.79208170165047   | 0.49003911695103   | h  |
| -2.07065810267952  | -1.81538181411337  | 0.33236101777113   | h  |
| #VO                |                    |                    |    |
| 0.0000000000000000 | 0.0000000000000000 | -1.49605986356322  | v  |
| 0.0000000000000000 | 0.0000000000000000 | 1.49605986356322   | o  |
| #VOF3              |                    |                    |    |
| 0.0000000000000000 | 0.0000000000000000 | 0.02138488636646   | v  |
| 0.0000000000000000 | 0.0000000000000000 | 2.99447623694060   | o  |
| -1.54851197430779  | 2.68210141562988   | -1.00528704110235  | f  |

|                   |                   |                   |    |
|-------------------|-------------------|-------------------|----|
| -1.54851197430779 | -2.68210141562988 | -1.00528704110235 | f  |
| 3.09702394861558  | 0.00000000000000  | -1.00528704110235 | f  |
| #ZnCl2            |                   |                   |    |
| 0.00000000000000  | 0.00000000000000  | 0.00000000000000  | zn |
| 0.00000000000000  | 0.00000000000000  | 3.97259040076298  | cl |
| 0.00000000000000  | 0.00000000000000  | -3.97259040076298 | cl |
| #ZnF2             |                   |                   |    |
| 0.00000000000000  | 0.00000000000000  | 0.00000000000000  | zn |
| 0.00000000000000  | 0.00000000000000  | 3.28287621534218  | f  |
| 0.00000000000000  | 0.00000000000000  | -3.28287621534218 | f  |
| #ZnH2             |                   |                   |    |
| 0.00000000000000  | 0.00000000000000  | 0.00000000000000  | zn |
| 0.00000000000000  | 0.00000000000000  | -2.92711569055511 | h  |
| 0.00000000000000  | 0.00000000000000  | 2.92711569055511  | h  |
| #ZnMe2            |                   |                   |    |
| 3.68342584557891  | 0.00005713689622  | 0.00026506182462  | c  |
| -3.68356713887322 | 0.00023772392501  | 0.00027909608166  | c  |
| 4.44876667227890  | 1.40886676936816  | -1.35377226518157 | h  |
| 4.44905348065180  | -1.87650086846691 | -0.54356099559000 | h  |
| 4.45013283461305  | 0.46800749693417  | 1.89658631099636  | h  |
| -4.44857871394426 | 1.21933922067696  | -1.52675501888773 | h  |
| -4.45004569978716 | 0.71048953578705  | 1.82005490636899  | h  |
| -4.44913036491722 | -1.93120927472341 | -0.29420173043471 | h  |
| -0.00005691560083 | 0.00071225960275  | 0.00110463482239  | zn |
| #Ag2              |                   |                   |    |
| 0.00000000000000  | 0.00000000000000  | -2.43284975341900 | ag |
| 0.00000000000000  | 0.00000000000000  | 2.43284975341900  | ag |
| #AgCl             |                   |                   |    |
| 0.00000000000000  | 0.00000000000000  | -2.17427221124677 | ag |
| 0.00000000000000  | 0.00000000000000  | 2.17427221124677  | cl |
| #CdF2             |                   |                   |    |
| 0.00000000000000  | 0.00000000000000  | 0.00000000000000  | cd |
| 0.00000000000000  | 0.00000000000000  | 3.65399698977701  | f  |
| 0.00000000000000  | 0.00000000000000  | -3.65399698977701 | f  |
| #CdMe2            |                   |                   |    |
| -0.01552765207821 | -0.00211074960291 | -0.00256455209819 | cd |
| -0.00518470223702 | -0.00014740649893 | 4.03174197678488  | c  |
| -0.00362618205013 | -0.00022460589332 | -4.02970589844624 | c  |
| 1.03909570930236  | 1.66912049287321  | 4.74981657043364  | h  |
| 0.94231936085281  | -1.72490849239420 | 4.75261331167082  | h  |
| -1.95136186467702 | 0.05616956014136  | 4.80782591209543  | h  |
| -1.54974432309212 | -1.20222871244731 | -4.77501608328692 | h  |
| 1.81386811131603  | -0.73818341030734 | -4.76612177697937 | h  |
| -0.26983845733673 | 1.94251332412944  | -4.76858946017406 | h  |
| #MoCO6            |                   |                   |    |
| 0.00000000000000  | 0.00000000000000  | 0.00000000000000  | mo |
| 0.00000000000000  | 3.90295652556995  | 0.00000000000000  | c  |
| 0.00000000000000  | 0.00000000000000  | 3.90295652556995  | c  |
| 3.90295652556995  | 0.00000000000000  | 0.00000000000000  | c  |
| 0.00000000000000  | 0.00000000000000  | -3.90295652556995 | c  |
| -3.90295652556995 | 0.00000000000000  | 0.00000000000000  | c  |
| 0.00000000000000  | -3.90295652556995 | 0.00000000000000  | c  |
| 0.00000000000000  | 6.09006160839460  | 0.00000000000000  | o  |
| 0.00000000000000  | 0.00000000000000  | 6.09006160839460  | o  |
| 6.09006160839460  | 0.00000000000000  | 0.00000000000000  | o  |
| 0.00000000000000  | 0.00000000000000  | -6.09006160839460 | o  |
| -6.09006160839460 | 0.00000000000000  | 0.00000000000000  | o  |

|                    |                    |                    |    |
|--------------------|--------------------|--------------------|----|
| 0.0000000000000000 | -6.09006160839460  | 0.0000000000000000 | o  |
| #MoF3              |                    |                    |    |
| 0.0000000000000000 | 0.0000000000000000 | -0.00159671171885  | mo |
| 1.77637872237622   | -3.07677820063990  | 0.00053223723962   | f  |
| 1.77637872237622   | 3.07677820063990   | 0.00053223723962   | f  |
| -3.55275744475244  | 0.0000000000000000 | 0.00053223723962   | f  |
| #MoH               |                    |                    |    |
| 0.0000000000000000 | 0.0000000000000000 | -1.62042478286011  | mo |
| 0.0000000000000000 | 0.0000000000000000 | 1.62042478286011   | h  |
| #MoO2              |                    |                    |    |
| 0.0000000000000000 | 0.0000000000000000 | 1.20329050676615   | mo |
| 2.70432477568260   | 0.0000000000000000 | -0.60164525338307  | o  |
| -2.70432477568260  | 0.0000000000000000 | -0.60164525338307  | o  |
| #MoO3              |                    |                    |    |
| 0.0000000000000000 | 0.0000000000000000 | -0.87497023552764  | mo |
| -1.52984968466562  | 2.64977738178409   | 0.29165674517588   | o  |
| -1.52984968466562  | -2.64977738178409  | 0.29165674517588   | o  |
| 3.05969936933125   | 0.0000000000000000 | 0.29165674517588   | o  |
| #NbF3              |                    |                    |    |
| 0.0000000000000000 | 0.0000000000000000 | 0.0000000000000000 | nb |
| -1.76123486076723  | 3.05054826291034   | 0.0000000000000000 | f  |
| -1.76123486076723  | -3.05054826291034  | 0.0000000000000000 | f  |
| 3.52246972153446   | 0.0000000000000000 | 0.0000000000000000 | f  |
| #NbO               |                    |                    |    |
| 0.0000000000000000 | 0.0000000000000000 | 1.61827909896555   | nb |
| 0.0000000000000000 | 0.0000000000000000 | -1.61827909896555  | o  |
| #NbO2              |                    |                    |    |
| 0.0000000000000000 | 0.0000000000000000 | 1.35090407793570   | nb |
| 2.58725120191969   | 0.0000000000000000 | -0.67545203896785  | o  |
| -2.58725120191969  | 0.0000000000000000 | -0.67545203896785  | o  |
| #NbO2F             |                    |                    |    |
| -0.02610891780556  | 0.86342528822632   | 0.06758988948919   | nb |
| 2.62395976524113   | 0.01237672503655   | -1.69666564370223  | o  |
| -2.62102600254883  | -0.14687228651066  | -1.69136676770083  | o  |
| 0.02317515511327   | -0.72892972675222  | 3.32044252191387   | f  |
| #PdCO4             |                    |                    |    |
| 0.00000919143467   | 0.00000531380106   | -0.00001191622877  | pd |
| 2.18351277656177   | 2.18350949811326   | 2.18351805760958   | c  |
| -2.18350195361372  | -2.18350090015659  | 2.18350128273601   | c  |
| 2.18351494366302   | -2.18352263605300  | -2.18351671330313  | c  |
| -2.18351964856344  | 2.18351087841231   | -2.18351593700892  | c  |
| 3.44064404148229   | 3.44064088770018   | 3.44067413451479   | o  |
| -3.44064406985283  | -3.44062025793711  | 3.44067735832652   | o  |
| 3.44066163241694   | -3.44068081079362  | -3.44066336280415  | o  |
| -3.44067691352870  | 3.44065802691347   | -3.44066290384197  | o  |
| #PdF               |                    |                    |    |
| 0.0000000000000000 | 0.0000000000000000 | -1.82090621303246  | pd |
| 0.0000000000000000 | 0.0000000000000000 | 1.82090621303246   | f  |
| #PdO2              |                    |                    |    |
| 0.0000000000000000 | 0.0000000000000000 | 0.00368780697011   | pd |
| -3.56296972714997  | 0.0000000000000000 | -0.00184390348506  | o  |
| 3.56296972714997   | 0.0000000000000000 | -0.00184390348506  | o  |
| #RhF               |                    |                    |    |
| 0.0000000000000000 | 0.0000000000000000 | -1.80303434766506  | rh |
| 0.0000000000000000 | 0.0000000000000000 | 1.80303434766506   | f  |
| #RhF4              |                    |                    |    |
| 0.0000000000000000 | 0.0000000000000000 | 0.0000000000000000 | rh |

|                   |                   |                   |    |
|-------------------|-------------------|-------------------|----|
| 2.11095283269456  | -2.11095283269456 | 2.11095283269456  | f  |
| -2.11095283269456 | 2.11095283269456  | 2.11095283269456  | f  |
| -2.11095283269456 | -2.11095283269456 | -2.11095283269456 | f  |
| 2.11095283269456  | 2.11095283269456  | -2.11095283269456 | f  |
| #RhF6             |                   |                   |    |
| 0.000000000000000 | 0.000000000000000 | 0.000000000000000 | rh |
| 2.51299833250292  | -2.51299833250292 | 0.000000000000000 | f  |
| 2.51299833250292  | 2.51299833250292  | 0.000000000000000 | f  |
| -2.51299833250292 | 2.51299833250292  | 0.000000000000000 | f  |
| -2.51299833250292 | -2.51299833250292 | 0.000000000000000 | f  |
| 0.000000000000000 | 0.000000000000000 | 3.55393480343994  | f  |
| 0.000000000000000 | 0.000000000000000 | -3.55393480343994 | f  |
| #RhO              |                   |                   |    |
| 0.000000000000000 | 0.000000000000000 | -1.63450098884323 | rh |
| 0.000000000000000 | 0.000000000000000 | 1.63450098884323  | o  |
| #RuCO5            |                   |                   |    |
| 0.000000000000000 | 0.000000000000000 | 0.000000000000000 | ru |
| 1.84480011535838  | -3.19528752960964 | 0.000000000000000 | c  |
| 1.84480011535838  | 3.19528752960964  | 0.000000000000000 | c  |
| -3.68960023071676 | 0.000000000000000 | 0.000000000000000 | c  |
| 0.000000000000000 | 0.000000000000000 | 3.69125554048716  | c  |
| 0.000000000000000 | 0.000000000000000 | -3.69125554048716 | c  |
| 2.94039490193387  | -5.09291336446596 | 0.000000000000000 | o  |
| 2.94039490193387  | 5.09291336446596  | 0.000000000000000 | o  |
| -5.88078980386773 | 0.000000000000000 | 0.000000000000000 | o  |
| 0.000000000000000 | 0.000000000000000 | 5.87379294085885  | o  |
| 0.000000000000000 | 0.000000000000000 | -5.87379294085885 | o  |
| #RuF              |                   |                   |    |
| 0.000000000000000 | 0.000000000000000 | -1.79559672059692 | ru |
| 0.000000000000000 | 0.000000000000000 | 1.79559672059692  | f  |
| #RuO              |                   |                   |    |
| 0.000000000000000 | 0.000000000000000 | -1.63370929862074 | ru |
| 0.000000000000000 | 0.000000000000000 | 1.63370929862074  | o  |
| #RuO2             |                   |                   |    |
| 0.000000000000000 | 0.000000000000000 | 0.000000000000000 | ru |
| 0.000000000000000 | 0.000000000000000 | 3.22936844775946  | o  |
| 0.000000000000000 | 0.000000000000000 | -3.22936844775946 | o  |
| #RuO4             |                   |                   |    |
| -0.00003901512132 | -0.00004974867915 | 0.00003175074579  | ru |
| 1.87142850130396  | 1.87147977103538  | 1.87148905199029  | o  |
| -1.87142232278019 | -1.87137312944410 | 1.87142093412647  | o  |
| 1.87151789303364  | -1.87153124203117 | -1.87151937514838 | o  |
| -1.87148505643610 | 1.87147434911906  | -1.87142236171416 | o  |
| #Tc2O7            |                   |                   |    |
| 0.000000000000000 | 0.000000000000000 | 0.000000000000000 | o  |
| 0.000000000000000 | 0.000000000000000 | 3.55098914866315  | tc |
| 0.000000000000000 | 0.000000000000000 | -3.55098914866315 | tc |
| 2.62571861860354  | -1.51595935126696 | 4.65860875354015  | o  |
| 2.62571861860354  | 1.51595935126696  | -4.65860875354015 | o  |
| 0.000000000000000 | 3.03191870253393  | 4.65860875354015  | o  |
| -2.62571861860354 | 1.51595935126696  | -4.65860875354015 | o  |
| -2.62571861860354 | -1.51595935126696 | 4.65860875354015  | o  |
| 0.000000000000000 | -3.03191870253393 | -4.65860875354015 | o  |
| #TcO              |                   |                   |    |
| 0.000000000000000 | 0.000000000000000 | -1.65131440458535 | tc |
| 0.000000000000000 | 0.000000000000000 | 1.65131440458535  | o  |
| #TcO3F            |                   |                   |    |



|                    |                    |                    |    |
|--------------------|--------------------|--------------------|----|
| 0.0000000000000000 | 0.0000000000000000 | -0.03575380241616  | tc |
| 0.0000000000000000 | 0.0000000000000000 | 3.47832150786421   | f  |
| 1.51189127548743   | -2.61867250466434  | -1.14752256848268  | o  |
| 1.51189127548743   | 2.61867250466434   | -1.14752256848268  | o  |
| -3.02378255097485  | 0.0000000000000000 | -1.14752256848268  | o  |
| #YF                |                    |                    |    |
| 0.0000000000000000 | 0.0000000000000000 | -1.84234806551158  | y  |
| 0.0000000000000000 | 0.0000000000000000 | 1.84234806551158   | f  |
| #YF3               |                    |                    |    |
| 0.0000000000000000 | 0.0000000000000000 | 0.00977112603694   | y  |
| -1.89922978387516  | 3.28956248091983   | -0.00325704201177  | f  |
| -1.89922978387516  | -3.28956248091983  | -0.00325704201177  | f  |
| 3.79845956775031   | 0.0000000000000000 | -0.00325704201177  | f  |
| #YO                |                    |                    |    |
| 0.0000000000000000 | 0.0000000000000000 | -1.72806290572366  | y  |
| 0.0000000000000000 | 0.0000000000000000 | 1.72806290572366   | o  |
| #ZrF               |                    |                    |    |
| 0.0000000000000000 | 0.0000000000000000 | -1.78049044438309  | zr |
| 0.0000000000000000 | 0.0000000000000000 | 1.78049044438309   | f  |
| #ZrF3              |                    |                    |    |
| 0.0000000000000000 | 0.0000000000000000 | 0.00444657710922   | zr |
| -1.82070257365541  | 3.15354936304259   | -0.00148219236669  | f  |
| -1.82070257365541  | -3.15354936304259  | -0.00148219236669  | f  |
| 3.64140514731082   | 0.0000000000000000 | -0.00148219236669  | f  |
| #ZrO               |                    |                    |    |
| 0.0000000000000000 | 0.0000000000000000 | -1.66498802952802  | zr |
| 0.0000000000000000 | 0.0000000000000000 | 1.66498802952802   | o  |
| #ZrO2              |                    |                    |    |
| 0.0000000000000000 | 0.0000000000000000 | 1.36096020616404   | zr |
| -2.71171774062042  | 0.0000000000000000 | -0.68048010308202  | o  |
| 2.71171774062042   | 0.0000000000000000 | -0.68048010308202  | o  |
| #Au2               |                    |                    |    |
| 0.0000000000000000 | 0.0000000000000000 | -2.42327065240856  | au |
| 0.0000000000000000 | 0.0000000000000000 | 2.42327065240856   | au |
| #Au3-              |                    |                    |    |
| 0.0000000000000000 | 0.0000000000000000 | 0.0000000000000000 | au |
| 0.0000000000000000 | 0.0000000000000000 | 4.97146253204511   | au |
| 0.0000000000000000 | 0.0000000000000000 | -4.97146253204511  | au |
| #AuCl              |                    |                    |    |
| 0.0000000000000000 | 0.0000000000000000 | -2.15000661513040  | au |
| 0.0000000000000000 | 0.0000000000000000 | 2.15000661513040   | cl |
| #AuCl3             |                    |                    |    |
| 0.0000000000000000 | 0.0000000000000000 | 0.0000000000000000 | au |
| 2.21054988848081   | -3.82878471951448  | 0.0000000000000000 | cl |
| 2.21054988848081   | 3.82878471951448   | 0.0000000000000000 | cl |
| -4.42109977696162  | 0.0000000000000000 | 0.0000000000000000 | cl |
| #HfF               |                    |                    |    |
| 0.0000000000000000 | 0.0000000000000000 | 1.78068737689156   | hf |
| 0.0000000000000000 | 0.0000000000000000 | -1.78068737689156  | f  |
| #HfF3              |                    |                    |    |
| 0.0000000000000000 | 0.0000000000000000 | 0.0000000000000000 | hf |
| 1.81947112203196   | -3.15141642626371  | 0.0000000000000000 | f  |
| 1.81947112203196   | 3.15141642626371   | 0.0000000000000000 | f  |
| -3.63894224406392  | 0.0000000000000000 | 0.0000000000000000 | f  |
| #HfO               |                    |                    |    |
| 0.0000000000000000 | 0.0000000000000000 | -1.66226332616427  | hf |
| 0.0000000000000000 | 0.0000000000000000 | 1.66226332616427   | o  |

|         |                    |                    |                    |    |
|---------|--------------------|--------------------|--------------------|----|
| #HfO2   |                    |                    |                    |    |
|         | 0.0000000000000000 | 0.0000000000000000 | 1.37910110648005   | hf |
|         | 2.72240351204331   | 0.0000000000000000 | -0.68955055324002  | o  |
|         | -2.72240351204331  | 0.0000000000000000 | -0.68955055324002  | o  |
| #HgF2   |                    |                    |                    |    |
|         | 0.0000000000000000 | 0.0000000000000000 | 0.0000000000000000 | hg |
|         | 0.0000000000000000 | 0.0000000000000000 | -3.69723523229824  | f  |
|         | 0.0000000000000000 | 0.0000000000000000 | 3.69723523229824   | f  |
| #HgMe2  |                    |                    |                    |    |
|         | 0.0000000000000000 | 0.0000000000000000 | 0.0000000000000000 | hg |
|         | 0.0000000000000000 | 0.0000000000000000 | 4.03656130521134   | c  |
|         | 0.0000000000000000 | 0.0000000000000000 | -4.03656130521134  | c  |
|         | 1.70138176612670   | -0.98229322066757  | 4.76366724761748   | h  |
|         | 1.70138176612670   | 0.98229322066757   | -4.76366724761748  | h  |
|         | 0.0000000000000000 | 1.96458644133514   | 4.76366724761748   | h  |
|         | -1.70138176612670  | 0.98229322066757   | -4.76366724761748  | h  |
|         | -1.70138176612670  | -0.98229322066757  | 4.76366724761748   | h  |
|         | 0.0000000000000000 | -1.96458644133514  | -4.76366724761748  | h  |
| #Hg2Cl2 |                    |                    |                    |    |
|         | -0.00092289111444  | -2.49971029372210  | 0.0000000000000000 | hg |
|         | 0.00086843425201   | 2.49894980264274   | 0.0000000000000000 | hg |
|         | 0.00005416705884   | -6.97426742991672  | 0.0000000000000000 | cl |
|         | 0.00000028980360   | 6.97502792099608   | 0.0000000000000000 | cl |
| #IrF6   |                    |                    |                    |    |
|         | 0.0000000000000000 | 0.0000000000000000 | 0.0000000000000000 | ir |
|         | 0.0000000000000000 | 0.0000000000000000 | 3.59726293025323   | f  |
|         | 0.0000000000000000 | 0.0000000000000000 | -3.59726293025323  | f  |
|         | 2.54361009647590   | -2.54361009647590  | 0.0000000000000000 | f  |
|         | 2.54361009647590   | 2.54361009647590   | 0.0000000000000000 | f  |
|         | -2.54361009647590  | 2.54361009647590   | 0.0000000000000000 | f  |
|         | -2.54361009647590  | -2.54361009647590  | 0.0000000000000000 | f  |
| #OsCO5  |                    |                    |                    |    |
|         | 0.0000000000000000 | 0.0000000000000000 | 0.0000000000000000 | os |
|         | 1.86245714222963   | -3.22587039726125  | 0.0000000000000000 | c  |
|         | 1.86245714222963   | 3.22587039726125   | 0.0000000000000000 | c  |
|         | -3.72491428445925  | 0.0000000000000000 | 0.0000000000000000 | c  |
|         | 0.0000000000000000 | 0.0000000000000000 | 3.74847701997556   | c  |
|         | 0.0000000000000000 | 0.0000000000000000 | -3.74847701997556  | c  |
|         | 2.95959230898802   | -5.12616424885734  | 0.0000000000000000 | o  |
|         | 2.95959230898802   | 5.12616424885734   | 0.0000000000000000 | o  |
|         | -5.91918461797604  | 0.0000000000000000 | 0.0000000000000000 | o  |
|         | 0.0000000000000000 | 0.0000000000000000 | 5.93170395303675   | o  |
|         | 0.0000000000000000 | 0.0000000000000000 | -5.93170395303675  | o  |
| #OsO2   |                    |                    |                    |    |
|         | 0.0000000000000000 | 0.0000000000000000 | -0.90139173199185  | os |
|         | 2.96334365356516   | 0.0000000000000000 | 0.45069586599592   | o  |
|         | -2.96334365356516  | 0.0000000000000000 | 0.45069586599592   | o  |
| #OsO3   |                    |                    |                    |    |
|         | 0.0000000000000000 | 0.0000000000000000 | 0.0000000000000000 | os |
|         | 1.63177166219432   | -2.82631142527168  | 0.0000000000000000 | o  |
|         | 1.63177166219432   | 2.82631142527168   | 0.0000000000000000 | o  |
|         | -3.26354332438864  | 0.0000000000000000 | 0.0000000000000000 | o  |
| #OsO4   |                    |                    |                    |    |
|         | 0.0000000000000000 | 0.0000000000000000 | 0.0000000000000000 | os |
|         | 1.90033009057400   | -1.90033009057400  | 1.90033009057400   | o  |
|         | -1.90033009057400  | 1.90033009057400   | 1.90033009057400   | o  |
|         | -1.90033009057400  | -1.90033009057400  | -1.90033009057400  | o  |

|                    |                    |                    |    |
|--------------------|--------------------|--------------------|----|
| 1.90033009057400   | 1.90033009057400   | -1.90033009057400  | o  |
| #OsOF5             |                    |                    |    |
| 0.0000000000000000 | 0.0000000000000000 | 0.22822360502953   | os |
| 0.0000000000000000 | 0.0000000000000000 | 3.47998909744502   | o  |
| 0.0000000000000000 | 0.0000000000000000 | -3.39562990080580  | f  |
| -2.53530418774888  | 2.53530418774888   | -0.07814570041718  | f  |
| -2.53530418774888  | -2.53530418774888  | -0.07814570041718  | f  |
| 2.53530418774888   | -2.53530418774888  | -0.07814570041718  | f  |
| 2.53530418774888   | 2.53530418774888   | -0.07814570041718  | f  |
| #PtCO4             |                    |                    |    |
| 0.0000000000000000 | 0.0000000000000000 | 0.0000000000000000 | pt |
| 2.17219503977633   | -2.17219503977633  | 2.17219503977633   | c  |
| -2.17219503977633  | 2.17219503977633   | 2.17219503977633   | c  |
| -2.17219503977633  | -2.17219503977633  | -2.17219503977633  | c  |
| 2.17219503977633   | 2.17219503977633   | -2.17219503977633  | c  |
| 3.43196912076035   | -3.43196912076035  | 3.43196912076035   | o  |
| -3.43196912076035  | 3.43196912076035   | 3.43196912076035   | o  |
| -3.43196912076035  | -3.43196912076035  | -3.43196912076035  | o  |
| 3.43196912076035   | 3.43196912076035   | -3.43196912076035  | o  |
| #PtO               |                    |                    |    |
| 0.0000000000000000 | 0.0000000000000000 | -1.67069134020836  | pt |
| 0.0000000000000000 | 0.0000000000000000 | 1.67069134020836   | o  |
| #PtO2              |                    |                    |    |
| 0.0000000000000000 | 0.0000000000000000 | 0.0000000000000000 | pt |
| 0.0000000000000000 | 0.0000000000000000 | -3.28869598692728  | o  |
| 0.0000000000000000 | 0.0000000000000000 | 3.28869598692728   | o  |
| #ReH               |                    |                    |    |
| 0.0000000000000000 | 0.0000000000000000 | -1.56532428006416  | re |
| 0.0000000000000000 | 0.0000000000000000 | 1.56532428006416   | h  |
| #ReO               |                    |                    |    |
| 0.0000000000000000 | 0.0000000000000000 | -1.67864437842535  | re |
| 0.0000000000000000 | 0.0000000000000000 | 1.67864437842535   | o  |
| #ReO2              |                    |                    |    |
| 0.0000000000000000 | 0.0000000000000000 | 0.0000000000000000 | re |
| 0.0000000000000000 | 0.0000000000000000 | -3.36557123070835  | o  |
| 0.0000000000000000 | 0.0000000000000000 | 3.36557123070835   | o  |
| #ReO3              |                    |                    |    |
| 0.0000000000000000 | 0.0000000000000000 | 0.0000000000000000 | re |
| -1.64935415797960  | 2.85676520129566   | 0.0000000000000000 | o  |
| -1.64935415797960  | -2.85676520129566  | 0.0000000000000000 | o  |
| 3.29870831595921   | 0.0000000000000000 | 0.0000000000000000 | o  |
| #ReO3F             |                    |                    |    |
| 0.0000000000000000 | 0.0000000000000000 | -0.00862182543285  | re |
| 0.0000000000000000 | 0.0000000000000000 | 3.55207214412449   | f  |
| -1.52651151621215  | 2.64399550441844   | -1.18115010623055  | o  |
| -1.52651151621215  | -2.64399550441844  | -1.18115010623055  | o  |
| 3.05302303242429   | 0.0000000000000000 | -1.18115010623055  | o  |
| #TaF               |                    |                    |    |
| 0.0000000000000000 | 0.0000000000000000 | -1.73663852825574  | ta |
| 0.0000000000000000 | 0.0000000000000000 | 1.73663852825574   | f  |
| #TaF3              |                    |                    |    |
| 0.0000000000000000 | 0.0000000000000000 | -0.00088004990885  | ta |
| -1.76481713541870  | 3.05675294461335   | 0.00029334996962   | f  |
| -1.76481713541870  | -3.05675294461335  | 0.00029334996962   | f  |
| 3.52963427083740   | 0.0000000000000000 | 0.00029334996962   | f  |
| #TaO2F             |                    |                    |    |
| 0.0000000000000000 | 0.0000000000000000 | 0.03006542312973   | ta |

|                    |                    |                    |   |
|--------------------|--------------------|--------------------|---|
| 0.0000000000000000 | 0.0000000000000000 | 3.72739793762169   | f |
| 2.74274130577697   | 0.0000000000000000 | -1.87873168037571  | o |
| -2.74274130577697  | 0.0000000000000000 | -1.87873168037571  | o |
| #WCO6              |                    |                    |   |
| 0.0000000000000000 | 0.0000000000000000 | 0.0000000000000000 | w |
| 0.0000000000000000 | 3.93720141856123   | 0.0000000000000000 | c |
| 0.0000000000000000 | 0.0000000000000000 | 3.93720141856123   | c |
| 3.93720141856123   | 0.0000000000000000 | 0.0000000000000000 | c |
| 0.0000000000000000 | 0.0000000000000000 | -3.93720141856123  | c |
| -3.93720141856123  | 0.0000000000000000 | 0.0000000000000000 | c |
| 0.0000000000000000 | -3.93720141856123  | 0.0000000000000000 | c |
| 0.0000000000000000 | 6.12568593744740   | 0.0000000000000000 | o |
| 0.0000000000000000 | 0.0000000000000000 | 6.12568593744740   | o |
| 6.12568593744740   | 0.0000000000000000 | 0.0000000000000000 | o |
| 0.0000000000000000 | 0.0000000000000000 | -6.12568593744740  | o |
| -6.12568593744740  | 0.0000000000000000 | 0.0000000000000000 | o |
| 0.0000000000000000 | -6.12568593744740  | 0.0000000000000000 | o |
| #WF3               |                    |                    |   |
| 0.0000000000000000 | 0.0000000000000000 | 0.00187166361740   | w |
| -1.79324602416154  | 3.10599322431868   | -0.00062388787247  | f |
| -1.79324602416154  | -3.10599322431868  | -0.00062388787247  | f |
| 3.58649204832309   | 0.0000000000000000 | -0.00062388787247  | f |
| #WH                |                    |                    |   |
| 0.0000000000000000 | 0.0000000000000000 | -1.62254316912897  | w |
| 0.0000000000000000 | 0.0000000000000000 | 1.62254316912897   | h |
| #WO                |                    |                    |   |
| 0.0000000000000000 | 0.0000000000000000 | -1.58822148469933  | w |
| 0.0000000000000000 | 0.0000000000000000 | 1.58822148469933   | o |
| #WO2               |                    |                    |   |
| 0.0000000000000000 | 0.0000000000000000 | 1.21145734769756   | w |
| -2.74201323107353  | 0.0000000000000000 | -0.60572867384878  | o |
| 2.74201323107353   | 0.0000000000000000 | -0.60572867384878  | o |
| #WO3               |                    |                    |   |
| 0.0000000000000000 | 0.0000000000000000 | 0.0000000000000000 | w |
| 1.67015014718729   | -2.89278491119702  | 0.0000000000000000 | o |
| 1.67015014718729   | 2.89278491119702   | 0.0000000000000000 | o |
| -3.34030029437458  | 0.0000000000000000 | 0.0000000000000000 | o |
